# Supplementary material for: Domesticated cannabinoid synthases amid a wild mosaic cannabis pangenome
Source: Nature. 2025 May 28;643(8073):1001–10. doi: 10.1038/s41586-025-09065-0 (PMC12286863; doi:10.1038/s41586-025-09065-0)
Supplement: Supplementary file 4 — Source Data Fig. 1 [file 41586_2025_9065_MOESM4_ESM.xlsx]

## Sheet: Figure1e_gene_counts
79X	private	125	125	32607
79X	core	2913	7335	32607
79X	softcore	13288	18815	32607
79X	shell	4823	6239	32607
79X	cloud	91	93	32607
ABAC	private	319	323	32826
ABAC	core	2913	7279	32826
ABAC	shell	5678	7384	32826
ABAC	softcore	13190	17644	32826
ABAC	cloud	191	196	32826
ABC	private	111	114	30151
ABC	core	2913	6839	30151
ABC	shell	4527	5847	30151
ABC	softcore	13221	17242	30151
ABC	cloud	106	109	30151
ACBD	private	121	121	36724
ACBD	core	2913	8325	36724
ACBD	shell	4794	6919	36724
ACBD	softcore	13264	21254	36724
ACBD	cloud	101	105	36724
ACDC	private	142	143	38664
ACDC	core	2913	8858	38664
ACDC	softcore	13302	22243	38664
ACDC	shell	5269	7329	38664
ACDC	cloud	87	91	38664
AH3Ma	private	113	113	28798
AH3Ma	core	2913	6706	28798
AH3Ma	shell	5101	6222	28798
AH3Ma	softcore	13221	15658	28798
AH3Ma	cloud	97	99	28798
AH3Mb	private	91	91	28286
AH3Mb	core	2913	6871	28286
AH3Mb	shell	4783	5924	28286
AH3Mb	softcore	12865	15282	28286
AH3Mb	cloud	116	118	28286
BBKH	private	152	153	42050
BBKH	core	2913	9887	42050
BBKH	softcore	13311	24391	42050
BBKH	shell	5113	7523	42050
BBKH	cloud	92	96	42050
BCMa	private	180	180	29579
BCMa	core	2913	6928	29579
BCMa	shell	5261	6491	29579
BCMa	softcore	13267	15816	29579
BCMa	cloud	158	164	29579
BCMb	private	117	117	27898
BCMb	core	2913	6774	27898
BCMb	shell	4446	5537	27898
BCMb	softcore	12856	15284	27898
BCMb	cloud	174	186	27898
BH4	private	202	203	44576
BH4	core	2913	10314	44576
BH4	shell	5553	8689	44576
BH4	softcore	13303	25215	44576
BH4	cloud	148	155	44576
BH44	private	96	97	36568
BH44	core	2913	8550	36568
BH44	shell	5067	6886	36568
BH44	softcore	13273	20946	36568
BH44	cloud	88	89	36568
BH55	private	186	186	35399
BH55	core	2913	8058	35399
BH55	shell	5320	7233	35399
BH55	softcore	13265	19753	35399
BH55	cloud	164	169	35399
BLCv1a	private	127	128	28963
BLCv1a	core	2913	6858	28963
BLCv1a	shell	4857	6050	28963
BLCv1a	softcore	13052	15714	28963
BLCv1a	cloud	206	213	28963
BLCv1b	private	247	248	28962
BLCv1b	core	2913	6857	28962
BLCv1b	shell	4773	5905	28962
BLCv1b	softcore	13140	15769	28962
BLCv1b	cloud	177	183	28962
BLYS	private	129	131	35892
BLYS	core	2913	8273	35892
BLYS	softcore	13306	21067	35892
BLYS	shell	4781	6344	35892
BLYS	cloud	76	77	35892
BOAXa	private	163	163	29318
BOAXa	core	2913	6762	29318
BOAXa	shell	5236	6376	29318
BOAXa	softcore	13218	15828	29318
BOAXa	cloud	188	189	29318
BOAXb	private	113	117	28736
BOAXb	core	2913	6789	28736
BOAXb	shell	4984	6002	28736
BOAXb	softcore	13216	15694	28736
BOAXb	cloud	131	134	28736
CALO	private	115	115	33179
CALO	core	2913	7771	33179
CALO	shell	4739	6096	33179
CALO	softcore	13277	19092	33179
CALO	cloud	104	105	33179
CANN	private	805	818	21713
CANN	core	2913	5273	21713
CANN	shell	4039	5004	21713
CANN	softcore	8489	10220	21713
CANN	cloud	369	398	21713
CBDRX	private	519	734	29159
CBDRX	core	2913	6111	29159
CBDRX	shell	5003	6126	29159
CBDRX	softcore	12807	15862	29159
CBDRX	cloud	253	326	29159
CBIO2	private	807	821	43443
CBIO2	core	2913	9514	43443
CBIO2	shell	5851	9396	43443
CBIO2	softcore	13152	23342	43443
CBIO2	cloud	332	370	43443
CHM9	private	93	94	30424
CHM9	core	2913	6993	30424
CHM9	softcore	13274	17799	30424
CHM9	shell	4343	5483	30424
CHM9	cloud	54	55	30424
CHMD3	private	93	93	29809
CHMD3	core	2913	6710	29809
CHMD3	softcore	13265	17717	29809
CHMD3	shell	4368	5252	29809
CHMD3	cloud	37	37	29809
CHMD5	private	115	115	31029
CHMD5	core	2913	7091	31029
CHMD5	shell	4744	6022	31029
CHMD5	softcore	13270	17725	31029
CHMD5	cloud	76	76	31029
CNBv1a	private	349	350	30021
CNBv1a	core	2913	7099	30021
CNBv1a	shell	4823	6201	30021
CNBv1a	softcore	13111	16206	30021
CNBv1a	cloud	161	165	30021
CNBv1b	private	610	612	28853
CNBv1b	core	2913	6713	28853
CNBv1b	shell	4423	5716	28853
CNBv1b	softcore	12866	15687	28853
CNBv1b	cloud	123	125	28853
COFBa	private	84	84	28235
COFBa	core	2913	6705	28235
COFBa	shell	4513	5525	28235
COFBa	softcore	13260	15839	28235
COFBa	cloud	81	82	28235
COFBb	private	190	191	30594
COFBb	core	2913	7134	30594
COFBb	shell	5672	7138	30594
COFBb	softcore	13234	15952	30594
COFBb	cloud	178	179	30594
COSVa	private	107	108	29183
COSVa	core	2913	6817	29183
COSVa	shell	5299	6393	29183
COSVa	softcore	13327	15735	29183
COSVa	cloud	129	130	29183
COSVb	private	97	97	29379
COSVb	core	2913	6758	29379
COSVb	shell	5367	6555	29379
COSVb	softcore	13325	15886	29379
COSVb	cloud	83	83	29379
CST53	private	218	219	41751
CST53	core	2913	9659	41751
CST53	shell	5325	7893	41751
CST53	softcore	13301	23853	41751
CST53	cloud	126	127	41751
CST8	private	83	83	30764
CST8	core	2913	7396	30764
CST8	softcore	13270	17800	30764
CST8	shell	4326	5411	30764
CST8	cloud	71	74	30764
DCHCC	private	136	138	38606
DCHCC	core	2913	9027	38606
DCHCC	softcore	13303	22109	38606
DCHCC	shell	5171	7225	38606
DCHCC	cloud	103	107	38606
DPFBa	private	153	154	26271
DPFBa	core	2913	6059	26271
DPFBa	softcore	13206	15057	26271
DPFBa	shell	4207	4918	26271
DPFBa	cloud	77	83	26271
DPFBb	private	79	79	26320
DPFBb	core	2913	6093	26320
DPFBb	softcore	13216	15126	26320
DPFBb	shell	4319	4970	26320
DPFBb	cloud	51	52	26320
DPSVa	private	97	97	30049
DPSVa	core	2913	7030	30049
DPSVa	shell	5562	6843	30049
DPSVa	softcore	13331	15936	30049
DPSVa	cloud	131	143	30049
DPSVb	private	100	100	29199
DPSVb	core	2913	6745	29199
DPSVb	shell	5284	6560	29199
DPSVb	softcore	13207	15728	29199
DPSVb	cloud	64	66	29199
DRBP	private	132	136	31132
DRBP	core	2913	7322	31132
DRBP	shell	4600	5782	31132
DRBP	softcore	13257	17812	31132
DRBP	cloud	80	80	31132
EH23a	private	70	70	29766
EH23a	core	2913	6967	29766
EH23a	shell	5457	6731	29766
EH23a	softcore	13326	15899	29766
EH23a	cloud	98	99	29766
EH23b	private	61	61	29235
EH23b	core	2913	6951	29235
EH23b	shell	5186	6457	29235
EH23b	softcore	13226	15682	29235
EH23b	cloud	83	84	29235
ERB	private	73	77	30489
ERB	core	2913	6981	30489
ERB	shell	4635	5774	30489
ERB	softcore	13270	17566	30489
ERB	cloud	87	91	30489
FB191	private	125	125	36571
FB191	core	2913	8396	36571
FB191	softcore	13273	21172	36571
FB191	shell	4933	6797	36571
FB191	cloud	77	81	36571
FB30	private	110	110	32067
FB30	core	2913	7575	32067
FB30	shell	4628	5966	32067
FB30	softcore	13269	18331	32067
FB30	cloud	82	85	32067
FBHO	private	158	160	36071
FBHO	core	2913	8558	36071
FBHO	shell	4295	5960	36071
FBHO	softcore	13136	21315	36071
FBHO	cloud	78	78	36071
FCS1a	private	154	154	26393
FCS1a	core	2913	6051	26393
FCS1a	softcore	13202	15121	26393
FCS1a	shell	4340	4993	26393
FCS1a	cloud	74	74	26393
FCS1b	private	170	170	29694
FCS1b	core	2913	7064	29694
FCS1b	shell	5262	6562	29694
FCS1b	softcore	13029	15719	29694
FCS1b	cloud	176	179	29694
FIMv1a	private	130	131	29244
FIMv1a	core	2913	6948	29244
FIMv1a	shell	5109	6271	29244
FIMv1a	softcore	13143	15702	29244
FIMv1a	cloud	186	192	29244
FIMv1b	private	386	388	29802
FIMv1b	core	2913	6875	29802
FIMv1b	shell	5071	6557	29802
FIMv1b	softcore	13064	15812	29802
FIMv1b	cloud	167	170	29802
FIN	private	1942	2061	37923
FIN	core	2913	7891	37923
FIN	shell	5715	8063	37923
FIN	softcore	12931	18999	37923
FIN	cloud	782	909	37923
FMv1a	private	159	159	29077
FMv1a	core	2913	6813	29077
FMv1a	shell	5015	6271	29077
FMv1a	softcore	13013	15647	29077
FMv1a	cloud	177	187	29077
FMv1b	private	157	158	29871
FMv1b	core	2913	7033	29871
FMv1b	shell	5095	6362	29871
FMv1b	softcore	13198	16190	29871
FMv1b	cloud	122	128	29871
FOG	private	165	166	36024
FOG	core	2913	8129	36024
FOG	shell	5142	7013	36024
FOG	softcore	13300	20609	36024
FOG	cloud	107	107	36024
GERv1a	private	123	124	25985
GERv1a	core	2913	6146	25985
GERv1a	shell	3964	4673	25985
GERv1a	softcore	13036	14930	25985
GERv1a	cloud	109	112	25985
GERv1b	private	140	140	28248
GERv1b	core	2913	6774	28248
GERv1b	shell	4872	6025	28248
GERv1b	softcore	12865	15155	28248
GERv1b	cloud	152	154	28248
GMO	private	170	173	42866
GMO	core	2913	9708	42866
GMO	shell	5458	8099	42866
GMO	softcore	13327	24793	42866
GMO	cloud	92	93	42866
GRMa	private	321	340	27212
GRMa	core	2913	6308	27212
GRMa	shell	4427	5486	27212
GRMa	softcore	12687	14939	27212
GRMa	cloud	138	139	27212
GRMb	private	693	695	30689
GRMb	core	2913	6945	30689
GRMb	shell	5556	7009	30689
GRMb	softcore	13272	15925	30689
GRMb	cloud	115	115	30689
GSC	private	133	133	35805
GSC	core	2913	8309	35805
GSC	softcore	13285	20497	35805
GSC	shell	4952	6780	35805
GSC	cloud	84	86	35805
H3S1a	private	238	240	26925
H3S1a	core	2913	6228	26925
H3S1a	shell	4364	5133	26925
H3S1a	softcore	13181	15158	26925
H3S1a	cloud	160	166	26925
H3S1b	private	130	131	29298
H3S1b	core	2913	6768	29298
H3S1b	shell	5274	6424	29298
H3S1b	softcore	13293	15827	29298
H3S1b	cloud	145	148	29298
H3S7a	private	156	156	29858
H3S7a	core	2913	6935	29858
H3S7a	shell	5483	6735	29858
H3S7a	softcore	13296	15895	29858
H3S7a	cloud	137	137	29858
H3S7b	private	135	135	29103
H3S7b	core	2913	6841	29103
H3S7b	shell	4946	6138	29103
H3S7b	softcore	13284	15838	29103
H3S7b	cloud	150	151	29103
HO40	private	117	118	32963
HO40	core	2913	7806	32963
HO40	shell	4739	6264	32963
HO40	softcore	13182	18667	32963
HO40	cloud	106	108	32963
I3	private	137	142	34215
I3	core	2913	7731	34215
I3	softcore	13165	19773	34215
I3	shell	4823	6465	34215
I3	cloud	100	104	34215
I52	private	133	134	33441
I52	core	2913	7748	33441
I52	shell	4920	6460	33441
I52	softcore	13275	18994	33441
I52	cloud	99	105	33441
I53	private	211	217	38868
I53	core	2913	9009	38868
I53	shell	5930	8348	38868
I53	softcore	13338	21157	38868
I53	cloud	132	137	38868
I59	private	76	81	33348
I59	core	2913	7764	33348
I59	shell	4593	6007	33348
I59	softcore	13264	19424	33348
I59	cloud	71	72	33348
I61	private	180	181	36335
I61	core	2913	8311	36335
I61	shell	5292	7205	36335
I61	softcore	13253	20519	36335
I61	cloud	111	119	36335
I68	private	176	179	41251
I68	core	2913	9567	41251
I68	shell	5481	7884	41251
I68	softcore	13253	23491	41251
I68	cloud	126	130	41251
I75	private	145	149	36386
I75	core	2913	8342	36386
I75	shell	4821	6456	36386
I75	softcore	13270	21346	36386
I75	cloud	90	93	36386
I78	private	206	216	38313
I78	core	2913	8869	38313
I78	shell	5901	8389	38313
I78	softcore	13342	20713	38313
I78	cloud	121	126	38313
ITLv1a	private	944	945	30467
ITLv1a	core	2913	7025	30467
ITLv1a	shell	4996	6549	30467
ITLv1a	softcore	12940	15747	30467
ITLv1a	cloud	194	201	30467
ITLv1b	private	1072	1073	30059
ITLv1b	core	2913	6773	30059
ITLv1b	shell	4866	6344	30059
ITLv1b	softcore	12858	15661	30059
ITLv1b	cloud	206	208	30059
JL	private	750	780	33350
JL	core	2913	7545	33350
JL	shell	5186	7039	33350
JL	softcore	12367	17562	33350
JL	cloud	393	424	33350
JLD	private	545	548	37760
JLD	core	2913	8810	37760
JLD	shell	5480	7914	37760
JLD	softcore	13304	20350	37760
JLD	cloud	132	138	37760
JLDSH	private	675	683	41628
JLDSH	core	2913	9562	41628
JLDSH	shell	5755	8841	41628
JLDSH	softcore	13233	22220	41628
JLDSH	cloud	310	322	41628
JLF	private	232	235	32935
JLF	core	2913	7608	32935
JLF	shell	5585	7389	32935
JLF	softcore	13266	17533	32935
JLF	cloud	166	170	32935
JLM	private	174	177	36841
JLM	core	2913	8589	36841
JLM	shell	5692	7872	36841
JLM	softcore	13301	20028	36841
JLM	cloud	171	175	36841
KCDv1a	private	409	410	30422
KCDv1a	core	2913	7051	30422
KCDv1a	shell	5276	6633	30422
KCDv1a	softcore	13122	16126	30422
KCDv1a	cloud	195	202	30422
KCDv1b	private	194	194	29599
KCDv1b	core	2913	6909	29599
KCDv1b	shell	5186	6474	29599
KCDv1b	softcore	13022	15825	29599
KCDv1b	cloud	197	197	29599
KOMPa	private	182	183	29387
KOMPa	core	2913	6825	29387
KOMPa	shell	5261	6477	29387
KOMPa	softcore	13182	15697	29387
KOMPa	cloud	194	205	29387
KOMPb	private	126	126	28350
KOMPb	core	2913	6753	28350
KOMPb	shell	4707	5899	28350
KOMPb	softcore	12879	15368	28350
KOMPb	cloud	199	204	28350
LP10	private	200	200	42499
LP10	core	2913	9742	42499
LP10	shell	5535	8105	42499
LP10	softcore	13308	24310	42499
LP10	cloud	134	142	42499
LP6	private	158	160	40499
LP6	core	2913	9303	40499
LP6	softcore	13303	23148	40499
LP6	shell	5410	7748	40499
LP6	cloud	133	140	40499
MBFBa	private	113	113	28259
MBFBa	core	2913	6629	28259
MBFBa	shell	4815	5801	28259
MBFBa	softcore	13283	15637	28259
MBFBa	cloud	79	79	28259
MBFBb	private	162	162	29031
MBFBb	core	2913	6740	29031
MBFBb	shell	5286	6385	29031
MBFBb	softcore	13175	15658	29031
MBFBb	cloud	86	86	29031
MBSVa	private	77	77	28685
MBSVa	core	2913	6680	28685
MBSVa	shell	5025	6087	28685
MBSVa	softcore	13295	15742	28685
MBSVa	cloud	98	99	28685
MBSVb	private	81	81	28650
MBSVb	core	2913	6736	28650
MBSVb	shell	4995	6078	28650
MBSVb	softcore	13296	15686	28650
MBSVb	cloud	69	69	28650
MM3v1a	private	205	206	29633
MM3v1a	core	2913	6777	29633
MM3v1a	shell	5321	6608	29633
MM3v1a	softcore	12894	15888	29633
MM3v1a	cloud	151	154	29633
MM3v1b	private	211	211	29649
MM3v1b	core	2913	6874	29649
MM3v1b	shell	5344	6604	29649
MM3v1b	softcore	12853	15788	29649
MM3v1b	cloud	171	172	29649
MNDB	private	142	142	37104
MNDB	core	2913	8556	37104
MNDB	shell	4974	6909	37104
MNDB	softcore	13257	21376	37104
MNDB	cloud	117	121	37104
NLv1a	private	150	150	29043
NLv1a	core	2913	6698	29043
NLv1a	shell	5259	6426	29043
NLv1a	softcore	13059	15671	29043
NLv1a	cloud	96	98	29043
NLv1b	private	151	151	29787
NLv1b	core	2913	6913	29787
NLv1b	shell	5565	6840	29787
NLv1b	softcore	13012	15758	29787
NLv1b	cloud	125	125	29787
OFBa	private	192	192	28182
OFBa	core	2913	6633	28182
OFBa	shell	5020	6094	28182
OFBa	softcore	12838	15168	28182
OFBa	cloud	92	95	28182
OFBb	private	110	110	30320
OFBb	core	2913	6963	30320
OFBb	shell	5465	6769	30320
OFBb	softcore	13320	16389	30320
OFBb	cloud	87	89	30320
OFP5	private	224	227	44784
OFP5	core	2913	10477	44784
OFP5	shell	6192	9471	44784
OFP5	softcore	13329	24455	44784
OFP5	cloud	151	154	44784
P20	private	161	161	33508
P20	core	2913	7885	33508
P20	shell	5383	7241	33508
P20	softcore	13341	18136	33508
P20	cloud	85	85	33508
P22	private	237	237	40198
P22	core	2913	9491	40198
P22	shell	6226	9094	40198
P22	softcore	13344	21175	40198
P22	cloud	192	201	40198
PBBK	private	1280	1307	20660
PBBK	core	2913	5094	20660
PBBK	shell	3318	4191	20660
PBBK	softcore	7617	9524	20660
PBBK	cloud	501	544	20660
PK	private	1381	1457	37619
PK	core	2913	7893	37619
PK	shell	5718	7992	37619
PK	softcore	12616	19508	37619
PK	cloud	673	769	37619
PPFBa	private	139	141	29925
PPFBa	core	2913	6957	29925
PPFBa	shell	5418	6738	29925
PPFBa	softcore	13277	15975	29925
PPFBa	cloud	113	114	29925
PPFBb	private	97	97	29784
PPFBb	core	2913	6904	29784
PPFBb	shell	5410	6603	29784
PPFBb	softcore	13316	16101	29784
PPFBb	cloud	79	79	29784
PTK32	private	186	186	34171
PTK32	core	2913	7982	34171
PTK32	shell	5475	7207	34171
PTK32	softcore	13324	18675	34171
PTK32	cloud	118	121	34171
PURD	private	169	170	45783
PURD	core	2913	10608	45783
PURD	shell	6335	10021	45783
PURD	softcore	13341	24815	45783
PURD	cloud	165	169	45783
PURP	private	260	263	49280
PURP	core	2913	11384	49280
PURP	shell	6602	10912	49280
PURP	softcore	13347	26535	49280
PURP	cloud	179	186	49280
S8H2LR	private	299	305	48680
S8H2LR	core	2913	11251	48680
S8H2LR	shell	6527	10394	48680
S8H2LR	softcore	13338	26532	48680
S8H2LR	cloud	190	198	48680
S8Ha	private	479	479	29438
S8Ha	core	2913	6697	29438
S8Ha	shell	5246	6499	29438
S8Ha	softcore	13089	15631	29438
S8Ha	cloud	132	132	29438
S8Hb	private	171	172	30150
S8Hb	core	2913	6869	30150
S8Hb	shell	5687	7023	30150
S8Hb	softcore	13184	15935	30150
S8Hb	cloud	147	151	30150
S8LR	private	175	179	41891
S8LR	core	2913	9694	41891
S8LR	shell	6135	9015	41891
S8LR	softcore	13348	22860	41891
S8LR	cloud	139	143	41891
SAN2a	private	208	208	30268
SAN2a	core	2913	7082	30268
SAN2a	shell	5415	6805	30268
SAN2a	softcore	13185	15940	30268
SAN2a	cloud	229	233	30268
SAN2b	private	166	166	29815
SAN2b	core	2913	6962	29815
SAN2b	shell	5348	6676	29815
SAN2b	softcore	13224	15810	29815
SAN2b	cloud	188	201	29815
SCFB	private	242	242	44637
SCFB	core	2913	10350	44637
SCFB	shell	5954	9399	44637
SCFB	softcore	13341	24505	44637
SCFB	cloud	138	141	44637
SDFBa	private	235	235	29778
SDFBa	core	2913	6899	29778
SDFBa	shell	5435	6608	29778
SDFBa	softcore	13304	15908	29778
SDFBa	cloud	127	128	29778
SDFBb	private	147	148	29382
SDFBb	core	2913	6788	29382
SDFBb	shell	5493	6658	29382
SDFBb	softcore	13199	15709	29382
SDFBb	cloud	77	79	29382
SDI	private	145	145	42809
SDI	core	2913	10047	42809
SDI	shell	5763	8812	42809
SDI	softcore	13343	23701	42809
SDI	cloud	97	104	42809
SG123	private	95	103	37832
SG123	core	2913	9015	37832
SG123	shell	5461	7739	37832
SG123	softcore	13340	20890	37832
SG123	cloud	84	85	37832
SGVA	private	289	292	45751
SGVA	core	2913	10787	45751
SGVA	shell	5877	9625	45751
SGVA	softcore	13339	24748	45751
SGVA	cloud	267	299	45751
SH50	private	197	197	38572
SH50	core	2913	9120	38572
SH50	shell	5772	8216	38572
SH50	softcore	13341	20954	38572
SH50	cloud	83	85	38572
SHH24	private	183	187	42045
SHH24	core	2913	9799	42045
SHH24	shell	6015	9100	42045
SHH24	softcore	13334	22812	42045
SHH24	cloud	142	147	42045
SHH5a	private	234	235	26616
SHH5a	core	2913	6101	26616
SHH5a	softcore	13129	15058	26616
SHH5a	shell	4465	5146	26616
SHH5a	cloud	76	76	26616
SHH5b	private	114	115	29180
SHH5b	core	2913	6781	29180
SHH5b	shell	5195	6342	29180
SHH5b	softcore	13294	15847	29180
SHH5b	cloud	93	95	29180
SHLR	private	115	118	39286
SHLR	core	2913	9279	39286
SHLR	shell	5955	8440	39286
SHLR	softcore	13346	21358	39286
SHLR	cloud	89	91	39286
SK88	private	182	185	47013
SK88	core	2913	10994	47013
SK88	shell	6280	9987	47013
SK88	softcore	13339	25704	47013
SK88	cloud	138	143	47013
SKFBa	private	95	95	29309
SKFBa	core	2913	6907	29309
SKFBa	shell	5336	6479	29309
SKFBa	softcore	13128	15724	29309
SKFBa	cloud	103	104	29309
SKFBb	private	168	168	30059
SKFBb	core	2913	6945	30059
SKFBb	shell	5411	6606	30059
SKFBb	softcore	13307	16234	30059
SKFBb	cloud	105	106	30059
SKSV	private	319	320	47991
SKSV	core	2913	10967	47991
SKSV	shell	6508	10553	47991
SKSV	softcore	13355	25962	47991
SKSV	cloud	174	189	47991
SKTZ	private	196	196	39666
SKTZ	core	2913	9027	39666
SKTZ	shell	5920	8375	39666
SKTZ	softcore	13340	21928	39666
SKTZ	cloud	139	140	39666
SMSQ	private	219	220	39750
SMSQ	core	2913	9242	39750
SMSQ	shell	5633	8275	39750
SMSQ	softcore	13333	21912	39750
SMSQ	cloud	99	101	39750
SN1v3a	private	332	332	26938
SN1v3a	core	2913	6260	26938
SN1v3a	shell	4246	5058	26938
SN1v3a	softcore	13013	15153	26938
SN1v3a	cloud	134	135	26938
SN1v3b	private	200	201	27635
SN1v3b	core	2913	6585	27635
SN1v3b	shell	4577	5642	27635
SN1v3b	softcore	12626	15051	27635
SN1v3b	cloud	153	156	27635
SODLa	private	71	71	26997
SODLa	core	2913	6204	26997
SODLa	softcore	13241	15347	26997
SODLa	shell	4487	5273	26997
SODLa	cloud	100	102	26997
SODLb	private	475	476	29840
SODLb	core	2913	6842	29840
SODLb	shell	5354	6511	29840
SODLb	softcore	13301	15919	29840
SODLb	cloud	91	92	29840
SSA1	private	117	117	32282
SSA1	core	2913	7417	32282
SSA1	shell	5642	7224	32282
SSA1	softcore	13321	17386	32282
SSA1	cloud	137	138	32282
SSA2	private	124	124	30953
SSA2	core	2913	7141	30953
SSA2	shell	5298	6656	30953
SSA2	softcore	13328	16920	30953
SSA2	cloud	112	112	30953
SSH	private	167	176	48674
SSH	core	2913	11254	48674
SSH	shell	6356	10296	48674
SSH	softcore	13330	26811	48674
SSH	cloud	132	137	48674
SSHS	private	180	181	42212
SSHS	core	2913	9574	42212
SSHS	shell	6197	9551	42212
SSHS	softcore	13347	22796	42212
SSHS	cloud	109	110	42212
SSLR	private	162	169	41534
SSLR	core	2913	9985	41534
SSLR	shell	5976	8751	41534
SSLR	softcore	13345	22515	41534
SSLR	cloud	106	114	41534
SSV	private	217	218	37290
SSV	core	2913	8570	37290
SSV	shell	5619	7943	37290
SSV	softcore	13334	20470	37290
SSV	cloud	86	89	37290
STHa	private	523	523	30853
STHa	core	2913	6975	30853
STHa	shell	5708	7182	30853
STHa	softcore	13298	16028	30853
STHa	cloud	141	145	30853
STHb	private	87	87	29190
STHb	core	2913	6763	29190
STHb	shell	5264	6429	29190
STHb	softcore	13291	15815	29190
STHb	cloud	95	96	29190
STLR	private	159	171	43507
STLR	core	2913	10183	43507
STLR	shell	6051	9131	43507
STLR	softcore	13343	23882	43507
STLR	cloud	137	140	43507
SUNDR	private	254	256	44584
SUNDR	core	2913	10359	44584
SUNDR	shell	6100	9393	44584
SUNDR	softcore	13351	24427	44584
SUNDR	cloud	146	149	44584
SUV8	private	172	172	39735
SUV8	core	2913	9369	39735
SUV8	shell	5747	8253	39735
SUV8	softcore	13345	21836	39735
SUV8	cloud	105	105	39735
SV2	private	220	220	38992
SV2	core	2913	9274	38992
SV2	shell	5780	8144	38992
SV2	softcore	13340	21248	38992
SV2	cloud	106	106	38992
SVA12a	private	175	175	29209
SVA12a	core	2913	6823	29209
SVA12a	shell	5236	6396	29209
SVA12a	softcore	13291	15739	29209
SVA12a	cloud	75	76	29209
SVA12b	private	130	130	29671
SVA12b	core	2913	6878	29671
SVA12b	shell	5409	6683	29671
SVA12b	softcore	13307	15861	29671
SVA12b	cloud	119	119	29671
SVA6a	private	284	284	29802
SVA6a	core	2913	6834	29802
SVA6a	shell	5560	6829	29802
SVA6a	softcore	13146	15773	29802
SVA6a	cloud	81	82	29802
SVA6b	private	162	162	28779
SVA6b	core	2913	6798	28779
SVA6b	shell	4821	5951	28779
SVA6b	softcore	13253	15781	28779
SVA6b	cloud	86	87	28779
SZFBa	private	137	137	28334
SZFBa	core	2913	6557	28334
SZFBa	shell	5063	5987	28334
SZFBa	softcore	13321	15574	28334
SZFBa	cloud	79	79	28334
SZFBb	private	78	78	25810
SZFBb	core	2913	5960	25810
SZFBb	shell	4197	4780	25810
SZFBb	softcore	13031	14949	25810
SZFBb	cloud	43	43	25810
TIBv1a	private	152	153	30105
TIBv1a	core	2913	7040	30105
TIBv1a	shell	5166	6515	30105
TIBv1a	softcore	13176	16151	30105
TIBv1a	cloud	229	246	30105
TIBv1b	private	525	526	29805
TIBv1b	core	2913	6896	29805
TIBv1b	shell	4855	6349	29805
TIBv1b	softcore	13013	15827	29805
TIBv1b	cloud	196	207	29805
TK10	private	78	79	31753
TK10	core	2913	7362	31753
TK10	shell	5378	6812	31753
TK10	softcore	13330	17399	31753
TK10	cloud	99	101	31753
TK7	private	194	194	33051
TK7	core	2913	7615	33051
TK7	shell	5398	7044	33051
TK7	softcore	13342	18106	33051
TK7	cloud	90	92	33051
TKFBa	private	229	229	27993
TKFBa	core	2913	6502	27993
TKFBa	shell	4754	5704	27993
TKFBa	softcore	13236	15493	27993
TKFBa	cloud	65	65	27993
TKFBb	private	114	114	29475
TKFBb	core	2913	6834	29475
TKFBb	shell	5411	6572	29475
TKFBb	softcore	13322	15856	29475
TKFBb	cloud	98	99	29475
TRWR	private	245	247	39141
TRWR	core	2913	9099	39141
TRWR	shell	5937	8786	39141
TRWR	softcore	13326	20782	39141
TRWR	cloud	220	227	39141
TS13	private	152	157	39768
TS13	core	2913	9301	39768
TS13	shell	6020	8726	39768
TS13	softcore	13341	21457	39768
TS13	cloud	123	127	39768
TST192	private	208	209	36113
TST192	core	2913	8478	36113
TST192	shell	5685	7777	36113
TST192	softcore	13329	19537	36113
TST192	cloud	112	112	36113
TST58	private	223	225	36152
TST58	core	2913	8375	36152
TST58	shell	5188	7063	36152
TST58	softcore	13334	20394	36152
TST58	cloud	91	95	36152
TURv1a	private	579	579	30214
TURv1a	core	2913	7021	30214
TURv1a	shell	5071	6395	30214
TURv1a	softcore	13098	16042	30214
TURv1a	cloud	173	177	30214
TURv1b	private	430	431	30055
TURv1b	core	2913	6982	30055
TURv1b	shell	5040	6426	30055
TURv1b	softcore	13186	16053	30055
TURv1b	cloud	160	163	30055
TWFBa	private	194	194	29610
TWFBa	core	2913	6901	29610
TWFBa	shell	5236	6505	29610
TWFBa	softcore	13275	15802	29610
TWFBa	cloud	206	208	29610
TWFBb	private	146	148	29606
TWFBb	core	2913	6831	29606
TWFBb	shell	5396	6643	29606
TWFBb	softcore	13333	15893	29606
TWFBb	cloud	87	91	29606
TWSVa	private	93	93	28635
TWSVa	core	2913	6737	28635
TWSVa	shell	4952	6002	28635
TWSVa	softcore	13320	15649	28635
TWSVa	cloud	152	154	28635
TWSVb	private	99	99	29788
TWSVb	core	2913	6848	29788
TWSVb	shell	5504	6738	29788
TWSVb	softcore	13305	16019	29788
TWSVb	cloud	82	84	29788
UFBa	private	273	273	29397
UFBa	core	2913	6882	29397
UFBa	shell	5156	6330	29397
UFBa	softcore	13296	15796	29397
UFBa	cloud	115	116	29397
UFBb	private	123	123	29796
UFBb	core	2913	6934	29796
UFBb	shell	5445	6632	29796
UFBb	softcore	13331	16022	29796
UFBb	cloud	84	85	29796
URKL	private	125	125	39027
URKL	core	2913	9367	39027
URKL	shell	5572	8044	39027
URKL	softcore	13343	21387	39027
URKL	cloud	103	104	39027
USV	private	130	132	47466
USV	core	2913	11225	47466
USV	shell	6209	9966	47466
USV	softcore	13345	26051	47466
USV	cloud	92	92	47466
W103	private	188	190	39240
W103	core	2913	9146	39240
W103	shell	5786	8449	39240
W103	softcore	13342	21332	39240
W103	cloud	116	123	39240
W19LR	private	98	105	38246
W19LR	core	2913	8962	38246
W19LR	shell	5638	7885	38246
W19LR	softcore	13348	21197	38246
W19LR	cloud	93	97	38246
WC	private	238	238	43971
WC	core	2913	10264	43971
WC	shell	5952	9183	43971
WC	softcore	13347	24162	43971
WC	cloud	120	124	43971
WCFBa	private	159	159	29944
WCFBa	core	2913	6927	29944
WCFBa	shell	5541	6828	29944
WCFBa	softcore	13321	15910	29944
WCFBa	cloud	119	120	29944
WCFBb	private	120	120	29005
WCFBb	core	2913	6604	29005
WCFBb	shell	5288	6405	29005
WCFBb	softcore	13329	15796	29005
WCFBb	cloud	78	80	29005
WCSV	private	172	172	44679
WCSV	core	2913	10475	44679
WCSV	shell	6167	9600	44679
WCSV	softcore	13328	24310	44679
WCSV	cloud	120	122	44679
WFv1a	private	170	170	29001
WFv1a	core	2913	6845	29001
WFv1a	shell	4931	6126	29001
WFv1a	softcore	13019	15646	29001
WFv1a	cloud	209	214	29001
WFv1b	private	150	150	28912
WFv1b	core	2913	6914	28912
WFv1b	shell	4827	5953	28912
WFv1b	softcore	13055	15733	28912
WFv1b	cloud	159	162	28912
WH106	private	186	188	40354
WH106	core	2913	9364	40354
WH106	shell	6060	8950	40354
WH106	softcore	13346	21726	40354
WH106	cloud	125	126	40354
WH72	private	217	218	37463
WH72	core	2913	8825	37463
WH72	shell	6017	8394	37463
WH72	softcore	13339	19901	37463
WH72	cloud	122	125	37463
WH94	private	102	102	35290
WH94	core	2913	8449	35290
WH94	shell	5250	7126	35290
WH94	softcore	13324	19536	35290
WH94	cloud	75	77	35290
WH96	private	212	213	38180
WH96	core	2913	8881	38180
WH96	shell	5880	8276	38180
WH96	softcore	13343	20667	38180
WH96	cloud	138	143	38180
WHLR	private	271	290	47891
WHLR	core	2913	11250	47891
WHLR	shell	6052	9828	47891
WHLR	softcore	13330	26390	47891
WHLR	cloud	126	133	47891
WHWa	private	187	187	30079
WHWa	core	2913	6953	30079
WHWa	shell	5543	6893	30079
WHWa	softcore	13282	15932	30079
WHWa	cloud	112	114	30079
WHWb	private	119	119	29541
WHWb	core	2913	6841	29541
WHWb	shell	5524	6685	29541
WHWb	softcore	13277	15801	29541
WHWb	cloud	95	95	29541
WIv1a	private	908	908	31242
WIv1a	core	2913	7140	31242
WIv1a	shell	5166	6770	31242
WIv1a	softcore	13032	16229	31242
WIv1a	cloud	191	195	31242
WIv1b	private	820	821	30448
WIv1b	core	2913	6960	30448
WIv1b	shell	4956	6411	30448
WIv1b	softcore	12894	16080	30448
WIv1b	cloud	174	176	30448
WLR	private	226	231	39898
WLR	core	2913	9395	39898
WLR	shell	5937	8585	39898
WLR	softcore	13341	21533	39898
WLR	cloud	148	154	39898
YMMv1a	private	164	169	29182
YMMv1a	core	2913	6861	29182
YMMv1a	shell	4975	6142	29182
YMMv1a	softcore	13207	15841	29182
YMMv1a	cloud	167	169	29182
YMMv1b	private	825	831	30464
YMMv1b	core	2913	6911	30464
YMMv1b	shell	5194	6669	30464
YMMv1b	softcore	13069	15842	30464
YMMv1b	cloud	206	211	30464
YMv2a	private	172	173	29452
YMv2a	core	2913	6882	29452
YMv2a	shell	5235	6454	29452
YMv2a	softcore	13174	15761	29452
YMv2a	cloud	181	182	29452
YMv2b	private	189	191	29145
YMv2b	core	2913	6739	29145
YMv2b	shell	5012	6178	29145
YMv2b	softcore	13239	15872	29145
YMv2b	cloud	157	165	29145

## Sheet: Figure1e_all_genome_IDs
AH3Ma
AH3Mb
BCMa
BCMb
BOAXa
BOAXb
COFBa
COFBb
COSVa
COSVb
DPFBa
DPFBb
DPSVa
DPSVb
EH23a
EH23b
FCS1a
FCS1b
GERv1a
GERv1b
GRMa
GRMb
H3S1a
H3S1b
H3S7a
H3S7b
KCDv1a
KCDv1b
KOMPa
KOMPb
MBFBa
MBFBb
MBSVa
MBSVb
MM3v1a
MM3v1b
NLv1a
NLv1b
OFBa
OFBb
PPFBa
PPFBb
S8Ha
S8Hb
SAN2a
SAN2b
SDFBa
SDFBb
SHH5a
SHH5b
SKFBa
SKFBb
SN1v3a
SN1v3b
SODLa
SODLb
STHa
STHb
SVA12a
SVA12b
SVA6a
SVA6b
SZFBa
SZFBb
TKFBa
TKFBb
TWFBa
TWFBb
TWSVa
TWSVb
UFBa
UFBb
WCFBa
WCFBb
WHWa
WHWb
YMv2a
YMv2b
79X
ABC
ACBD
ACDC
BBKH
BH4
BH44
BH55
BLCv1a
BLCv1b
BLYS
CALO
CHM9
CHMD3
CHMD5
CNBv1a
CNBv1b
CST53
CST8
DCHCC
DRBP
ERB
FB191
FB30
FBHO
FIMv1a
FIMv1b
FMv1a
FMv1b
FOG
GMO
GSC
HO40
I3
I52
I53
I59
I61
I68
I75
I78
ITLv1a
ITLv1b
LP10
LP6
MNDB
OFP5
P20
P22
PTK32
PURD
PURP
S8H2LR
S8LR
SCFB
SDI
SG123
SGVA
SH50
SHH24
SHLR
SK88
SKSV
SKTZ
SMSQ
SSA1
SSA2
SSH
SSHS
SSLR
SSV
STLR
SUNDR
SUV8
SV2
TIBv1a
TIBv1b
TK10
TK7
TRWR
TS13
TST192
TST58
TURv1a
TURv1b
URKL
USV
W103
W19LR
WC
WCSV
WFv1a
WFv1b
WH106
WH72
WH94
WH96
WHLR
WIv1a
WIv1b
WLR
YMMv1a
YMMv1b
ABAC
CANN
CBDRX
CBIO2
FIN
JL
JLD
JLDSH
JLF
JLM
PBBK
PK

## Sheet: Figure1e_population_IDs
Abv	Chemotype	Type
79X	1	mj
ABAC	3	hc_hemp
ABC	1	mj
ACBD	3	hc_hemp
ACDC	3	mj
AH3Ma	1	mj
AH3Mb	1	mj
BBKH	1	mj
BCMa	3	feral
BCMb	3	feral
BH4	1	mj
BH44	4	mj
BH55	1	mj
BLCv1a	3	hemp
BLCv1b	3	hemp
BLYS	1	mj
BOAXa	3	hc_hemp
BOAXb	3	hc_hemp
CALO	1	mj
CANN	1	hc_hemp
CBDRX	3	hc_hemp
CBIO2	1	hc_hemp
CHM9	1	mj
CHMD3	1	mj
CHMD5	1	mj
CNBv1a	1 or 4	asian_hemp
CNBv1b	1 or 4	asian_hemp
COFBa	1	mj
COFBb	1	mj
COSVa	2	F1
COSVb	2	F1
CST53	3	hc_hemp
CST8	2	F1
DCHCC	3	hc_hemp
DPFBa	1	mj
DPFBb	1	mj
DPSVa	2	F1
DPSVb	2	F1
DRBP	1	mj
EH23a	1	mj
EH23b	3	hc_hemp
ERB	3	hc_hemp
F49v1a	2	EXCLUDED
F49v1b	2	EXCLUDED
FB191	4	hc_hemp
FB30	4	hc_hemp
FBHO	1	F1
FCS1a	1	F1
FCS1b	4	F1
FIMv1a	3	feral
FIMv1b	3?	feral
FIN	?	hemp
FMv1a	3?	feral
FMv1b	3?	feral
FOG	1	mj
GERv1a	3	hemp
GERv1b	3	hemp
GMO	1	mj
GRMa	3	hc_hemp
GRMb	3	hc_hemp
GSC	1	mj
H3S1a	1	F1
H3S1b	4	F1
H3S7a	1	F1
H3S7b	4	F1
HO40	1	mj
I3	5	hc_hemp
I52	5	hc_hemp
I53	5	hc_hemp
I59	5	hc_hemp
I61	5	hc_hemp
I68	5	hc_hemp
I75	5	hc_hemp
I78	5	hc_hemp
ITLv1a	1?	hemp
ITLv1b	1?	hemp
JL	4	asian_hemp
JLD	2	F1
JLDSH	2	F1
JLF	2	F1
JLM	2	F1
KCDv1a	3	hemp
KCDv1b	3	hemp
KOMPa	3	hemp
KOMPb	3	hemp
LP10	1	mj
LP6	1	mj
MBFBa	1	mj
MBFBb	1	mj
MBSVa	1	F1
MBSVb	1	F1
MM3v1a	3	hc_hemp
MM3v1b	3	hc_hemp
MNDB	1	mj
NLv1a	1	mj
NLv1b	1	mj
OFBa	1	mj
OFBb	1	mj
OFP5	1	mj
P20	4	hc_hemp
P22	4	hc_hemp
PBBK	1	mj
PK	1	mj
PPFBa	1	mj
PPFBb	1	mj
PTK32	1	mj
PURD	1	mj
PURP	1	mj
S8H2LR	2	F1
S8Ha	2	mj
S8Hb	2	mj
S8LR	3	hc_hemp
SAN2a	4	hemp
SAN2b	4	hemp
SCFB	1	mj
SDFBa	1	mj
SDFBb	1	mj
SDI	1	mj
SG123	4	hc_hemp
SGVA	4	hemp
SH50	3	hc_hemp
SHH24	3	hc_hemp
SHH5a	2	mj
SHH5b	2	mj
SHLR	3	hc_hemp
SK88	1	mj
SKFBa	1	mj
SKFBb	1	mj
SKSV	2	F1
SKTZ	1	mj
SMSQ	1	mj
SN1v3a	4	hemp
SN1v3b	4	hemp
SODLa	1	mj
SODLb	1	mj
SSA1	3	hc_hemp
SSA2	3	hc_hemp
SSH	2	F1
SSHS	3	hc_hemp
SSLR	3	hc_hemp
SSV	3	hc_hemp
STHa	3	mj
STHb	1	mj
STLR	3	hc_hemp
SUNDR	1	mj
SUV8	3	hc_hemp
SV2	3	hc_hemp
SVA12a	3	mj
SVA12b	3	mj
SVA6a	3	mj
SVA6b	3	mj
SZFBa	1	mj
SZFBb	1	mj
TIBv1a	3	hemp
TIBv1b	3	hemp
TK10	1	mj
TK7	1	mj
TKFBa	1	mj
TKFBb	1	mj
TRWR	1	mj
TS13	4	hc_hemp
TST192	4	hc_hemp
TST58	4	hemp
TURv1a	3	hemp
TURv1b	3	hemp
TWFBa	1	mj
TWFBb	1	mj
TWSVa	2	F1
TWSVb	2	F1
UFBa	1	mj
UFBb	1	mj
URKL	1	mj
USV	2	F1
W103	4	hc_hemp
W19LR	4	hc_hemp
WC	1	mj
WCFBa	1	mj
WCFBb	1	mj
WCSV	2	F1
WFv1a	3	hc_hemp
WFv1b	3	hc_hemp
WH106	4	hc_hemp
WH72	4	hc_hemp
WH94	1	hc_hemp
WH96	1	mj
WHLR	1	mj
WHWa	1	mj
WHWb	1	mj
WIv1a	3	feral
WIv1b	3	feral
WLR	4	hc_hemp
YMMv1a	3	asian_hemp
YMMv1b	3	asian_hemp
YMv2a	3	asian_hemp
YMv2b	3	asian_hemp

## Sheet: Figure1e_scaffolded_IDs
AH3Ma
AH3Mb
BCMa
BCMb
BOAXa
BOAXb
COFBa
COFBb
COSVa
COSVb
DPFBa
DPFBb
DPSVa
DPSVb
EH23a
EH23b
FCS1a
FCS1b
GERv1a
GERv1b
GRMa
GRMb
H3S1a
H3S1b
H3S7a
H3S7b
KCDv1a
KCDv1b
KOMPa
KOMPb
MBFBa
MBFBb
MBSVa
MBSVb
MM3v1a
MM3v1b
NLv1a
NLv1b
OFBa
OFBb
PPFBa
PPFBb
S8Ha
S8Hb
SAN2a
SAN2b
SDFBa
SDFBb
SHH5a
SHH5b
SKFBa
SKFBb
SN1v3a
SN1v3b
SODLa
SODLb
STHa
STHb
SVA12a
SVA12b
SVA6a
SVA6b
SZFBa
SZFBb
TKFBa
TKFBb
TWFBa
TWFBb
TWSVa
TWSVb
UFBa
UFBb
WCFBa
WCFBb
WHWa
WHWb
YMv2a
YMv2b

## Sheet: Figure1e_unscaffolded_IDs
79X
ABC
ACBD
ACDC
BBKH
BH4
BH44
BH55
BLCv1a
BLCv1b
BLYS
CALO
CHM9
CHMD3
CHMD5
CNBv1a
CNBv1b
CST53
CST8
DCHCC
DRBP
ERB
FB191
FB30
FBHO
FIMv1a
FIMv1b
FMv1a
FMv1b
FOG
GMO
GSC
HO40
I3
I52
I53
I59
I61
I68
I75
I78
ITLv1a
ITLv1b
LP10
LP6
MNDB
OFP5
P20
P22
PTK32
PURD
PURP
S8H2LR
S8LR
SCFB
SDI
SG123
SGVA
SH50
SHH24
SHLR
SK88
SKSV
SKTZ
SMSQ
SSA1
SSA2
SSH
SSHS
SSLR
SSV
STLR
SUNDR
SUV8
SV2
TIBv1a
TIBv1b
TK10
TK7
TRWR
TS13
TST192
TST58
TURv1a
TURv1b
URKL
USV
W103
W19LR
WC
WCSV
WFv1a
WFv1b
WH106
WH72
WH94
WH96
WHLR
WIv1a
WIv1b
WLR
YMMv1a
YMMv1b

## Sheet: Figure1e_public_IDs
ABAC
CANN
CBDRX
CBIO2
FIN
JL
JLD
JLDSH
JLF
JLM
PBBK
PK
