# Supplementary material for: Domesticated cannabinoid synthases amid a wild mosaic cannabis pangenome
Source: Nature. 2025 May 28;643(8073):1001–10. doi: 10.1038/s41586-025-09065-0 (PMC12286863; doi:10.1038/s41586-025-09065-0)
Supplement: Supplementary file 5 — Source Data Fig. 2 [file 41586_2025_9065_MOESM5_ESM.xlsx]

## Sheet: Figure2a_percentMasked
Ty1-LTR	Ty3-LTR	unknown-LTR	CACTA	Mutator	PIF_Harbinger	Tc1_Mariner	hAT	helitron	Names
15.41	20.41	17.41	3.53	6.26	1.22	0.2	1.08	4.91	mj
17.55	19.84	15.64	5.02	7.1	1.24	0.22	0.96	1.86	mj
17.73	20.85	18.14	1.51	5.82	0.84	0.25	1.18	3.09	mj
16.16	20.32	16.47	3.51	4.79	1.35	0.26	1.92	2.8	mj
18.18	19.97	18.09	3.14	4.06	0.54	0.21	2.64	2.89	mj
16.8	19.67	17.83	6.66	3.31	1.77	0.16	1.07	2.22	mj
16.63	19.84	17.9	2.15	3.87	1.06	0.07	1.34	4.98	mj
14.77	20.28	16.81	3.16	6.1	1.05	0.15	1.56	3.8	mj
16.68	18.25	14.72	4.25	6.02	1.08	0.2	3.08	3.65	mj
14.98	20.3	15.88	4.18	7.33	2.09	0.23	1.04	2.75	mj
16.99	19.54	15.14	3.77	3.27	1.24	3.75	0.96	2.08	mj
16.49	20.85	17.66	1.8	6.52	1.17	0.18	2.98	2.24	mj
15.96	19.53	18.89	1.74	7.98	1.39	0.23	1.04	1.96	mj
14.88	20.33	16.79	8.05	5.19	1.28	0.15	0.93	2.39	mj
15.99	19.27	11.04	5.71	8.9	1.48	0.31	1.8	3.5	mj
14.62	20.29	17.65	4.91	5.72	1.21	0.3	2.22	3.07	mj
15.53	20.85	14.25	5.25	7.49	1.22	0.36	0.96	2.22	mj
17.83	21.39	11.34	1.75	7.26	1.1	0.25	1.56	5.1	mj
14.95	19.25	19.71	3.19	6.07	1.13	0.21	1.54	1.9	mj
15.34	18.98	18.59	2.16	5.9	1.12	2.61	1.99	2.53	mj
17.78	19.95	19.76	1.31	7.15	1.25	0.31	0.96	1.32	mj
14.49	19.49	16.63	2.61	6.99	1.93	0.27	5.54	2.57	mj
16.14	21.81	15.28	3.22	6.23	1.29	0.13	1.38	3.53	mj
17.3	19.33	20.46	1.95	4.78	1.26	0.94	2.05	1.39	mj
16.7	19.56	18.83	1.69	7.34	1.19	0.28	0.99	2.72	mj
16.77	21.36	13.56	1.75	10.12	1.23	0.24	1.75	2.99	mj
16.48	19.97	16.93	3.97	4.39	0.96	0.19	1.25	3.06	mj
15.99	18.98	15.09	1.83	5.2	1	0.18	1.31	8.19	mj
17.89	20.01	17.85	5.59	2.88	0.71	0.22	1.52	2.8	mj
14.6	18.45	18.68	3.25	4.01	0.66	0.2	4.06	3.44	mj
15	20.24	19.49	2.67	6.69	1.38	0.19	1.69	1.56	mj
18.92	19.4	15.11	4.99	3.14	0.97	0.21	1.02	3.92	mj
15.6	19.93	16.29	1.41	5.78	1.33	0.43	5.9	1.08	mj
14.54	19.82	16.46	8.33	6.72	1.08	0.34	1.08	1.51	mj
15.31	21.75	15.29	3.67	3.12	0.89	0.19	1.65	4.34	mj
15.85	18.48	13.51	8.19	6.31	0.6	0.21	1.07	4.01	mj
15.39	19	13.16	2.46	7.38	0.84	0.37	1.56	8.63	mj
14.48	20.66	16.11	4.36	9.5	0.92	0.06	1.97	1.34	mj
14.67	20.9	16.76	4.84	6.41	1.37	0.21	1.45	4.13	mj
15.23	21.58	21.22	1.57	6.78	1.89	0.12	1.04	1.31	mj
14.95	18.8	15.59	4.53	6	2.16	0.27	2.13	3.73	mj
18.16	18.26	13.76	3.45	7.92	1.08	2.63	2.52	1.43	mj
16.8	20.03	12.86	1.7	8.35	1.5	0.08	1.38	7.45	mj
15.5	19.7	18.4	2.75	5.72	0.76	0.28	1.86	1.66	mj
18.47	19.49	17.47	4.2	4.96	1.03	0.1	1.38	1.18	mj
14.38	19.99	17.46	5.01	8.55	0.86	0.19	1.29	2.22	mj
14.63	19.94	13.18	1.82	6.38	1.14	0.41	7	3.14	mj
18.39	18.36	19.7	1.76	6.19	1.26	0.33	1.38	1.93	mj
19.61	19.86	20.42	1.76	4.98	1.46	0.38	0.89	1.15	mj
20.33	18.76	16.18	1.76	5.67	1.2	0.17	1.4	1.44	mj
16.23	18.28	14.28	5.04	6.26	0.97	0.19	1.83	4.92	mj
16.64	21.3	16.85	3.03	6.29	0.73	0.19	3.49	1.16	mj
15.75	18.66	18.17	2.12	5.66	0.86	0.05	1.05	5.53	mj
17.57	21.46	17.61	2.08	2.46	0.9	0.22	4.4	1.36	mj
17.55	20.2	17.02	2.24	5.83	1.28	0.26	1.64	1.89	mj
16.09	18.81	15.54	3.78	5.35	1.3	0.27	3.19	3.5	mj
15.69	18.79	17.28	5.44	5.91	0.94	1.75	1.77	1.41	mj
17.22	19.52	17	4.47	7.14	0.96	0.16	1.05	1.73	mj
18.44	19.5	14.25	1.42	7	1.28	2.64	2.09	1.26	mj
18.14	20.8	18.21	2.07	5.92	1.21	0.2	1.05	0.85	mj
15.92	20.05	16.44	3.56	6.29	1.23	0.86	2.57	1.08	mj
16.52	20.44	18.29	2.57	5.72	1.22	0.3	2.1	1.03	mj
15.93	19.47	15.47	3.55	6.2	1.16	0.14	1.58	3.74	mj
16.18	21.58	10.91	3.93	6.85	1.74	0.1	5.06	1.17	mj
15.44	21.47	14.55	5.73	6.75	1.35	0.24	1.5	1.51	mj
15.46	21.52	14.24	5.73	6.25	1.69	0.16	1.65	1.7	mj
17.11	20.61	13.62	2.3	6.51	1.17	0.24	1.61	4.11	mj
16.06	21.31	10.92	2.67	8.42	1.14	0.18	1.66	4.99	mj
15.89	19.36	13.56	3.4	6.81	0.73	0.22	1.44	7.13	mj
14.75	17.95	17.22	1.55	7.02	1.11	0.13	5.66	1.75	mj
17.04	20.55	12.21	1.29	9.12	0.87	0.18	2.59	3.72	mj
17.35	18.83	14.9	3.27	6.68	1.78	0.21	1.13	2.85	mj
17.6	19.05	18.86	2.39	6.01	1.75	0.33	1.65	0.91	mj
17.61	20.19	19.16	3.64	5.35	1	0.15	0.98	2.28	mj
14.76	21.08	18	1.47	8.15	0.93	0.13	1.46	1.85	mj
15.62	21.19	15.24	3.28	7.19	1.14	0.12	1.85	2.14	mj
16.99	20.47	23.37	1.81	5.2	1.23	0.15	0.87	1.01	mj
18.55	18.47	15.16	2.58	6.36	1.01	2.05	1.08	1.45	mj
16.27	20.21	23.08	2.06	2.74	1.36	0.3	1.85	0.93	mj
16.69	20	20.37	1.71	4.22	0.81	0.25	0.89	1.87	mj
15.57	19.48	20.54	3.84	3.95	1.27	0.22	0.89	2.84	mj
15.34	21.31	19.04	1.6	2.96	1.23	0.25	3.08	2.06	hc hemp
14.53	20.05	15.55	2.42	7.42	0.69	0.22	1.58	8.09	hc hemp
17.38	18.14	19.38	2.15	5.88	1.04	0.11	0.93	1.57	hc hemp
15.3	18.83	18.73	2.73	5.07	0.98	0.1	1.26	4.72	hc hemp
17.4	12.41	22.32	2.55	5.06	0.63	0.14	4.81	3.05	hc hemp
13.72	19.73	16.68	4.9	3.84	0.94	0.26	1.22	3.52	hc hemp
16.15	20.42	18.12	5.73	5.68	1.28	0.22	1.94	1.06	hc hemp
15.38	19.46	17.61	6.05	6.16	1.08	0.14	1.06	2.26	hc hemp
19.99	19.97	19.6	1.72	3.82	0.84	0.27	1.06	0.83	hc hemp
20.8	20.18	18.09	1.88	4.2	0.84	0.34	1.12	0.69	hc hemp
15.22	18.23	12.42	1.94	6.67	1.11	0.28	1.62	8.94	hc hemp
15.67	21.64	16.25	5.3	3.9	0.98	0.19	1.21	4.2	hc hemp
17.57	19.88	19.08	1.81	4.81	1.3	0.2	1.24	2.07	hc hemp
15.29	19.35	16.16	6.35	6.11	0.78	0.64	1.75	1.81	hc hemp
17.46	20	15.05	1.83	6.29	1.56	0.13	2.24	3.53	hc hemp
17.55	20.85	15.45	2.79	4.81	0.64	0.26	4.1	2.36	hc hemp
15.1	19.92	19.13	2.97	3.92	1.12	0.23	2.21	4.33	hc hemp
15.36	20.37	19.74	1.84	3.76	1.21	0.22	3.8	2.52	hc hemp
19.64	20.62	18.04	2.04	2.88	1.43	0.23	1.09	2.66	hc hemp
16.18	20.69	19.46	1.81	4.07	1.26	0.21	2.69	3.63	hc hemp
17.64	19.6	16.99	3.26	5.42	0.96	0.2	1.46	2.68	hc hemp
18.35	21.29	18.7	1.91	3.43	1.64	0.15	1.29	2.64	hc hemp
20.2	20.44	18.32	1.48	3.47	1.3	0.22	1.07	1.44	hc hemp
19.5	19.77	17.87	1.61	4.8	0.99	0.2	0.87	2.35	hc hemp
20.46	18.82	14.27	3.79	6.21	0.93	0.1	1.06	2.13	hc hemp
17.9	19.38	16.03	1.92	7.51	0.97	0.16	2.18	2.45	hc hemp
15.34	21.14	19	4.3	3.58	1.31	0.32	1.22	2.86	hc hemp
17.71	20.51	17.2	1.91	5.11	1.11	0.15	2.09	2.22	hc hemp
15.26	20.11	14.91	4.65	8.19	1.32	0.34	2.13	2.66	hc hemp
15.02	20.48	20.38	2.18	6.3	1.03	0.23	2.68	1.46	hc hemp
15.64	20.3	16.35	5.1	4.49	1.73	0.16	1.41	3.45	hc hemp
16.8	21.29	17.57	1.68	6.82	1.33	0.2	1.05	1.22	hc hemp
14.92	20.3	19.29	1.62	6.99	1.1	0.15	1.05	2.63	hc hemp
15.43	18.7	17.93	2.45	7.85	1.41	0.28	1.67	1.52	hc hemp
16.18	24.14	17.05	2.55	3.01	1.24	0.3	1.35	3.56	hc hemp
15.53	19.05	14.43	4.01	8.56	1.18	0.2	1.86	3.2	hc hemp
17.36	19.07	20.77	1.94	3.59	1.55	0.24	1.15	3.05	hc hemp
14.94	21.06	17.5	5.73	6.39	1.41	0.64	1.58	1.71	hc hemp
16.93	18.92	18.21	1.59	6	1.46	0.43	1.39	1.12	hc hemp
20.62	20.15	16.32	2.66	3.62	0.87	0.15	1.44	2.21	hc hemp
15.12	18.63	21.55	2.56	5.71	2.04	0.22	0.93	2.85	hc hemp
16.33	20.16	13.62	5.92	5.73	0.84	0.21	4.09	1.43	hc hemp
16.17	20.88	14.75	2.91	5.92	1.67	0.12	2.03	3.68	hc hemp
14.59	20.09	20.02	2.92	5.66	0.58	0.12	1.3	2.45	hc hemp
13.21	19.7	18.63	5.04	3.3	1.25	0.17	5	2.63	hc hemp
17.36	18.28	14.43	1.75	7.67	1.27	2.06	1.94	1.37	hc hemp
17.81	18.42	15.82	2.19	9.9	1.54	0.21	1.29	3.1	hc hemp
18.85	18.77	15.18	5.43	2.83	1.15	0.28	1.5	3.55	hc hemp
20.89	20.22	14.1	3.2	3.18	0.92	0.28	3.3	1.27	hc hemp
17.56	19.04	16.6	2.78	8.88	0.7	0.19	1.14	1.15	feral
12.98	21.19	15.35	2.65	10.72	0.44	0.23	1.59	4.62	feral
17.14	21.07	15.8	4.42	4.23	0.97	0.24	2.15	3.45	feral
16.25	22.01	16.56	4.76	5.39	1.04	0.13	1.71	1.33	feral
16.45	20.92	17.07	2.31	4.79	0.91	0.13	3.22	3.48	feral
16.57	21.05	16.61	2.83	4.9	1.4	0.24	3.44	2.17	hemp
17.87	21.63	19.64	1.96	4.76	1.02	0.07	1.02	1.56	hemp
14.62	19.8	18.45	2.31	7.1	0.59	0.06	1.89	2.65	hemp
15.74	20.06	15.75	8.52	4.75	0.45	0.05	1.6	1.69	hemp
16.83	19.3	14.11	5.32	5.07	1.51	0.07	2.2	2.49	hemp
16.95	19.76	16.78	4.19	5.43	1.58	0.23	1.09	2.75	hemp
14.98	20.42	12.4	6.53	4.1	1.58	0.12	2.03	5.02	hemp
16.01	23.08	15.51	3.38	4.17	1.32	0.24	1.91	4.95	hemp
13.36	17.24	20.31	2.21	4.96	1.13	0.06	1.05	2.79	hemp
14.98	20.12	19.8	3.06	4.76	1.19	0.06	1.08	1.98	hemp
15.05	20.46	23	2.1	5.19	1.48	0.18	1.17	1.59	hemp
13.06	20	20.06	1.36	5.29	0.67	0.07	0.95	1.75	hemp
15.41	20.02	16.03	1.89	5.62	0.84	0.08	1	5.69	hemp
15.39	22.18	19.11	1.47	5.29	0.71	0.15	2.4	3.14	hemp
14.79	22.25	19.45	2.74	4.49	1.08	0.11	0.84	4.26	hemp
15.93	18.56	20.03	2.68	6.45	1.47	0.13	1.89	1.63	hemp
18.22	20.27	21.56	1.85	3.87	0.87	0.1	1	1.1	hemp
16.6	22.02	16.63	2.99	5.75	0.83	0.22	1.54	3.4	hemp
15.04	23.26	16.95	2.1	4.95	0.78	0.18	3.1	3.78	Asian hemp
15.02	22.46	15.45	3.88	3.23	0.68	0.21	5.68	3.3	Asian hemp
19.77	21.44	17.57	2.13	3.24	1.17	0.27	0.92	1.72	Asian hemp
17.15	20.38	21.02	2.2	5.26	1.41	0.06	0.93	1.72	Asian hemp
20.36	22.4	16.73	1.37	5.43	0.67	0.26	1.02	2.38	Asian hemp
15.14	20.84	15.51	2.08	5.52	1.1	0.34	1.3	5.18	Asian hemp
14.75	20.05	16.81	1.63	6.12	0.74	0.15	0.9	8.04	Asian hemp
13.3	19.68	17.88	3.6	7.03	1.11	0.38	1.46	4.65	F1
15.38	19.02	15.07	6.21	6.69	0.93	0.74	2.49	2.5	F1
17	19.04	18.67	2.77	7.32	0.91	0.21	1.15	2	F1
16.18	18.83	15.47	4.82	7.76	1.19	0.33	1.43	2.98	F1
16.63	18.62	15.7	5.14	7.11	1.54	1.04	1.84	2.07	F1
16.09	18.66	15.98	4.47	7.16	1.35	0.29	2.09	2.89	F1
13.53	21.71	15.84	5.02	5.47	0.79	0.08	1.44	1.5	F1
17.42	20.55	17.66	2.01	5.9	1.02	0.2	0.9	1.61	F1
18.52	19.53	17.33	1.52	6.58	0.62	0.15	0.94	0.97	F1
14.25	21.37	15.07	3.49	6.06	0.99	0.29	3.59	2.61	F1
12.36	19.88	19.15	1.46	7.88	1.64	0.07	3.46	1.73	F1
15.56	19.32	20.89	2.04	4.87	0.86	0.08	2.45	1.73	F1
18.6	21.82	18.61	1.97	2.92	0.71	0.26	1	3.13	F1
16.68	20.01	20.07	4.06	3.15	1.42	0.14	1.51	1.95	F1
15.89	23.92	16.6	2.57	6.87	0.67	0.18	1.29	1.57	F1
19.36	20.64	18.25	4.26	2.39	0.9	0.08	1.89	2.02	F1
16.18	20.14	16.22	2.63	6.36	0.97	0.16	1.97	3.26	F1
17.25	21.52	14.1	1.75	6.77	0.97	2.2	1.62	3.24	F1
17.36	19.32	14.73	2.73	6.49	2.4	1.29	1.65	2.86	F1
19.06	21.49	19.05	1.94	2.81	1.29	0.34	1.43	1.17	F1
15.63	18.21	15.05	2.35	8.74	1.11	0.17	1.46	5.61	F1
19.36	20.15	17.15	1.57	6.7	1.17	0.19	1.31	1.18	F1
14.75	19.54	18.77	2.98	7.07	2.6	1.57	1.12	1.5	F1
15.24	19.39	16.44	5.57	7.57	1.37	0.63	1.06	3.06	F1

## Sheet: Figure2b_nonintact_TE_times_mya
Column1	Column2	Column3	Column4	Column5
genomeID	chrIDstructureIDteID			teTimesMYA
ABAC	chr1	NonIntact	Mutator_TIR_transposon	21.9672131147541,22.131147540983605,22.622950819672134,22.213114754098363,15.655737704918028,23.032786885245905,17.04918032786885,11.475409836065575,15.49180327868852,11.557377049180328,18.934426229508194,10.737704918032788,22.868852459016395,24.508196721
ABAC	chr1	NonIntact	LTR_retrotransposon	16.63934426229508,16.0655737704918,9.344262295081966,10.40983606557377,16.557377049180324,15.983606557377046,9.508196721311474,10.245901639344263,16.63934426229508,12.868852459016395,11.967213114754099,16.393442622950815,12.459016393442624,16.065573770491
ABAC	chr1	NonIntact	helitron	12.459016393442624,14.016393442622954,22.95081967213115,18.114754098360653,6.393442622950817,19.754098360655735,20.983606557377048,17.786885245901637,16.22950819672131,11.39344262295082,17.29508196721311,17.86885245901639,17.950819672131143,19.59016393442
ABAC	chr1	NonIntact	Copia_LTR_retrotransposon	14.672131147540988,20.245901639344265,14.672131147540988,20.245901639344265,14.344262295081972,18.360655737704917,5.000000000000004,4.50819672131148,11.80327868852459,11.147540983606559,18.114754098360653,15.819672131147538,0.491803278688525,14.1803278688
ABAC	chr1	NonIntact	hAT_TIR_transposon	1.7213114754098378,4.262295081967217,7.131147540983603,9.426229508196721,10.737704918032788,8.770491803278686,15.000000000000004,8.688524590163933,12.622950819672134,14.754098360655743,17.45901639344262,14.590163934426233,2.8688524590163964,15.98360655737
ABAC	chr1	NonIntact	PIF_Harbinger_TIR_transposon	15.245901639344268,19.262295081967213,5.1639344262295035,1.1475409836065582,2.786885245901642,20.491803278688526,15.901639344262291,13.524590163934429,13.196721311475413,15.081967213114758,12.786885245901642,15.655737704918028,16.803278688524586,13.688524
ABAC	chr1	NonIntact	Tc1_Mariner_TIR_transposon	19.42622950819672,17.86885245901639,16.967213114754095,13.524590163934429,18.606557377049178,11.80327868852459,14.262295081967215,20.737704918032787,20.327868852459016,20.81967213114754,16.885245901639344,15.901639344262291,11.147540983606559,10.655737704918032,19.918032786885245,18.0327868852459,14.836065573770496,15.737704918032781,15.901639344262291,21.557377049180328,15.819672131147538,13.032…
ABAC	chr1	NonIntact	CACTA_TIR_transposon	12.622950819672134,12.704918032786887,10.081967213114753,21.885245901639347,9.344262295081966,16.803278688524586,10.98360655737705,13.032786885245905,12.95081967213115,10.0,13.770491803278691,8.278688524590162,19.83606557377049,15.163934426229511,15.90163
ABAC	chr1	NonIntact	Gypsy_LTR_retrotransposon	14.590163934426233,15.081967213114758,15.901639344262291,14.50819672131148,14.50819672131148,15.081967213114758,14.50819672131148,14.50819672131148,15.081967213114758,15.081967213114758,14.50819672131148,14.50819672131148,15.081967213114758,14.50819672131
ABAC	chr2	NonIntact	Copia_LTR_retrotransposon	17.704918032786882,11.065573770491802,11.721311475409838,18.688524590163933,18.770491803278688,17.950819672131143,18.114754098360653,13.032786885245905,0.98360655737705,17.62295081967213,5.1639344262295035,7.868852459016391,16.22950819672131,14.2622950819
ABAC	chr2	NonIntact	LTR_retrotransposon	18.852459016393443,12.868852459016395,2.213114754098363,1.9672131147541,10.327868852459018,3.852459016393446,15.245901639344268,21.229508196721312,17.1311475409836,16.393442622950815,15.655737704918028,19.754098360655735,6.065573770491799,5.65573770491802
ABAC	chr2	NonIntact	helitron	10.573770491803279,23.442622950819676,2.213114754098363,10.98360655737705,16.885245901639344,13.196721311475413,15.901639344262291,18.360655737704917,8.0327868852459,9.01639344262295,20.163934426229506,20.901639344262293,19.59016393442623,12.7049180327868
ABAC	chr2	NonIntact	PIF_Harbinger_TIR_transposon	17.29508196721311,15.409836065573767,17.04918032786885,13.934426229508201,13.524590163934429,14.672131147540988,23.852459016393446,20.983606557377048,18.852459016393443,22.95081967213115,16.885245901639344,6.721311475409832,18.934426229508194,14.098360655
ABAC	chr2	NonIntact	Mutator_TIR_transposon	5.819672131147537,17.86885245901639,19.18032786885246,12.459016393442624,21.393442622950822,18.114754098360653,4.180327868852463,21.393442622950822,23.77049180327869,12.049180327868855,18.852459016393443,20.40983606557377,24.34426229508197,9.0163934426229
ABAC	chr2	NonIntact	CACTA_TIR_transposon	7.377049180327866,19.0983606557377,11.147540983606559,11.475409836065575,17.540983606557372,13.852459016393446,22.622950819672134,21.885245901639347,23.36065573770492,11.229508196721312,19.83606557377049,18.196721311475407,19.18032786885246,20.73770491803
ABAC	chr2	NonIntact	hAT_TIR_transposon	18.852459016393443,18.278688524590162,17.950819672131143,9.59016393442623,12.37704918032787,19.508196721311474,22.54098360655738,9.754098360655737,17.704918032786882,16.72131147540983,11.311475409836067,19.83606557377049,6.393442622950817,23.9344262295081
ABAC	chr2	NonIntact	Gypsy_LTR_retrotransposon	5.081967213114759,8.196721311475407,11.885245901639346,2.1311475409836085,17.62295081967213,15.000000000000004,20.983606557377048,4.8360655737704965,7.540983606557375,4.344262295081971,14.098360655737707,9.508196721311474,10.573770491803279,22.54098360655
ABAC	chr2	NonIntact	Tc1_Mariner_TIR_transposon	17.540983606557372,12.786885245901642,9.918032786885245,19.754098360655735,14.754098360655743,16.22950819672131,9.836065573770492,12.786885245901642,23.19672131147541,16.72131147540983,16.0655737704918,9.836065573770492,11.311475409836067,17.786885245901637,14.754098360655743,14.672131147540988,9.180327868852459,17.950819672131143,17.62295081967213,13.032786885245905,16.31147540983606,20.16393442…
ABAC	chr3	NonIntact	LTR_retrotransposon	4.8360655737704965,6.885245901639341,10.819672131147541,7.704918032786884,7.377049180327866,10.98360655737705,4.590163934426233,7.868852459016391,7.868852459016391,8.442622950819672,5.409836065573766,20.655737704918035,20.901639344262293,8.196721311475407
ABAC	chr3	NonIntact	Copia_LTR_retrotransposon	15.901639344262291,11.557377049180328,11.885245901639346,18.770491803278688,1.8852459016393461,22.131147540983605,12.213114754098363,11.39344262295082,9.098360655737704,9.098360655737704,14.672131147540988,16.557377049180324,9.426229508196721,9.4262295081
ABAC	chr3	NonIntact	hAT_TIR_transposon	21.721311475409834,5.409836065573766,9.672131147540982,8.524590163934425,14.180327868852462,4.590163934426233,14.50819672131148,1.393442622950821,14.098360655737707,12.459016393442624,16.803278688524586,12.786885245901642,8.934426229508196,14.590163934426
ABAC	chr3	NonIntact	CACTA_TIR_transposon	14.91803278688525,8.196721311475407,8.196721311475407,15.655737704918028,19.42622950819672,14.754098360655743,19.18032786885246,21.557377049180328,14.426229508196725,8.196721311475407,20.81967213114754,15.983606557377046,14.672131147540988,19.672131147540
ABAC	chr3	NonIntact	Gypsy_LTR_retrotransposon	16.885245901639344,17.86885245901639,10.655737704918032,14.91803278688525,11.557377049180328,20.163934426229506,18.278688524590162,16.885245901639344,14.344262295081972,16.31147540983606,12.786885245901642,14.098360655737707,12.213114754098363,4.836065573
ABAC	chr3	NonIntact	helitron	16.47540983606557,11.147540983606559,19.18032786885246,12.54098360655738,21.557377049180328,14.016393442622954,7.540983606557375,10.163934426229508,5.1639344262295035,16.557377049180324,16.31147540983606,10.327868852459018,16.885245901639344,11.1475409836
ABAC	chr3	NonIntact	Mutator_TIR_transposon	4.344262295081971,7.868852459016391,21.065573770491806,14.016393442622954,4.180327868852463,15.901639344262291,9.672131147540982,7.622950819672129,20.163934426229506,19.18032786885246,21.229508196721312,8.852459016393441,23.19672131147541,17.6229508196721
ABAC	chr3	NonIntact	PIF_Harbinger_TIR_transposon	16.72131147540983,11.147540983606559,22.131147540983605,21.475409836065577,15.901639344262291,16.31147540983606,18.770491803278688,16.885245901639344,24.590163934426233,19.672131147540984,14.50819672131148,18.278688524590162,14.836065573770496,24.50819672131148,24.34426229508197,20.163934426229506,14.098360655737707,20.245901639344265,20.245901639344265,21.639344262295083,22.295081967213118,18.44…
ABAC	chr3	NonIntact	Tc1_Mariner_TIR_transposon	14.91803278688525,19.42622950819672,18.114754098360653,18.114754098360653,8.770491803278686,15.327868852459021,20.81967213114754,11.967213114754099,12.704918032786887,13.688524590163937,13.36065573770492,16.31147540983606,16.63934426229508,18.852459016393443,20.0,18.360655737704917,9.426229508196721,17.786885245901637,17.540983606557372,17.540983606557372,11.311475409836067,18.278688524590162,15.…
ABAC	chr4	NonIntact	Mutator_TIR_transposon	15.409836065573767,1.5573770491803294,17.950819672131143,17.704918032786882,14.836065573770496,20.40983606557377,23.114754098360656,12.459016393442624,22.70491803278689,14.754098360655743,13.114754098360658,11.065573770491802,16.147540983606554,17.3770491
ABAC	chr4	NonIntact	Copia_LTR_retrotransposon	13.36065573770492,13.852459016393446,14.262295081967215,12.54098360655738,12.131147540983608,23.032786885245905,12.786885245901642,19.42622950819672,13.114754098360658,13.36065573770492,16.967213114754095,2.8688524590163964,8.196721311475407,17.0491803278
ABAC	chr4	NonIntact	LTR_retrotransposon	15.245901639344268,9.180327868852459,9.59016393442623,6.311475409836063,3.1147540983606588,4.590163934426233,10.40983606557377,10.737704918032788,13.606557377049183,12.54098360655738,10.655737704918032,10.081967213114753,8.278688524590162,6.06557377049179
ABAC	chr4	NonIntact	CACTA_TIR_transposon	19.0983606557377,21.311475409836063,2.377049180327871,17.1311475409836,13.524590163934429,22.295081967213118,18.114754098360653,10.655737704918032,22.213114754098363,8.934426229508196,10.901639344262296,9.508196721311474,18.442622950819672,12.131147540983
ABAC	chr4	NonIntact	PIF_Harbinger_TIR_transposon	20.40983606557377,7.213114754098358,5.819672131147537,5.737704918032783,23.27868852459017,13.524590163934429,12.459016393442624,15.409836065573767,11.311475409836067,11.229508196721312,10.327868852459018,22.78688524590164,23.19672131147541,15.49180327868852,24.09836065573771,11.80327868852459,23.032786885245905,21.803278688524593,19.262295081967213,18.114754098360653,17.540983606557372,17.5409836…
ABAC	chr4	NonIntact	hAT_TIR_transposon	15.163934426229511,3.688524590163938,2.95081967213115,15.737704918032781,13.606557377049183,12.786885245901642,16.63934426229508,17.04918032786885,11.721311475409838,14.098360655737707,15.327868852459021,4.016393442622954,12.786885245901642,15.81967213114
ABAC	chr4	NonIntact	helitron	2.7049180327868876,3.2786885245901667,14.836065573770496,22.622950819672134,14.590163934426233,18.442622950819672,21.393442622950822,15.983606557377046,14.754098360655743,20.0,18.524590163934423,22.70491803278689,15.409836065573767,13.770491803278691,17.0
ABAC	chr4	NonIntact	Gypsy_LTR_retrotransposon	11.147540983606559,6.065573770491799,20.901639344262293,16.967213114754095,10.081967213114753,18.196721311475407,13.196721311475413,7.04918032786885,12.95081967213115,7.622950819672129,16.47540983606557,7.704918032786884,10.245901639344263,12.377049180327
ABAC	chr4	NonIntact	Tc1_Mariner_TIR_transposon	15.081967213114758,17.86885245901639,23.442622950819676,14.262295081967215,13.442622950819676,13.196721311475413,14.91803278688525,23.36065573770492,20.901639344262293,24.50819672131148,8.360655737704915,15.163934426229511,17.62295081967213,14.180327868852462,15.573770491803273,17.29508196721311,11.80327868852459,18.0327868852459,13.524590163934429,16.0655737704918,11.229508196721312,17.950819672…
ABAC	chr5	NonIntact	Copia_LTR_retrotransposon	5.819672131147537,6.721311475409832,10.327868852459018,3.524590163934429,5.573770491803274,1.8852459016393461,10.819672131147541,16.22950819672131,8.688524590163933,9.59016393442623,5.409836065573766,22.459016393442624,16.803278688524586,16.47540983606557
ABAC	chr5	NonIntact	Gypsy_LTR_retrotransposon	16.393442622950815,2.213114754098363,22.049180327868854,13.196721311475413,5.901639344262291,8.0327868852459,2.8688524590163964,6.5573770491803245,1.5573770491803294,13.196721311475413,4.9180327868852505,7.131147540983603,2.786885245901642,23.770491803278
ABAC	chr5	NonIntact	helitron	6.885245901639341,20.40983606557377,2.4590163934426252,16.63934426229508,16.803278688524586,20.327868852459016,13.852459016393446,13.770491803278691,13.196721311475413,5.983606557377045,11.721311475409838,10.655737704918032,16.885245901639344,13.442622950
ABAC	chr5	NonIntact	CACTA_TIR_transposon	20.491803278688526,15.49180327868852,15.245901639344268,1.393442622950821,15.409836065573767,17.04918032786885,15.819672131147538,19.83606557377049,22.78688524590164,7.540983606557375,10.573770491803279,17.540983606557372,16.31147540983606,8.0327868852459
ABAC	chr5	NonIntact	LTR_retrotransposon	11.80327868852459,13.196721311475413,3.6065573770491834,7.622950819672129,11.721311475409838,23.442622950819676,14.754098360655743,14.262295081967215,7.459016393442621,8.114754098360654,8.442622950819672,5.655737704918029,5.901639344262291,14.016393442622
ABAC	chr5	NonIntact	PIF_Harbinger_TIR_transposon	2.95081967213115,16.803278688524586,15.737704918032781,13.852459016393446,13.524590163934429,14.672131147540988,12.37704918032787,18.934426229508194,13.688524590163937,12.37704918032787,12.786885245901642,22.868852459016395,12.786885245901642,15.983606557377046,16.72131147540983,10.737704918032788,14.836065573770496,17.1311475409836,19.508196721311474,13.196721311475413,5.000000000000004,18.60655…
ABAC	chr5	NonIntact	Mutator_TIR_transposon	5.409836065573766,7.04918032786885,13.688524590163937,9.262295081967212,11.721311475409838,15.819672131147538,15.983606557377046,14.344262295081972,16.47540983606557,14.262295081967215,17.704918032786882,17.86885245901639,19.42622950819672,17.213114754098
ABAC	chr5	NonIntact	hAT_TIR_transposon	14.91803278688525,18.852459016393443,15.000000000000004,13.196721311475413,8.442622950819672,13.032786885245905,12.95081967213115,24.50819672131148,23.27868852459017,15.245901639344268,12.786885245901642,15.245901639344268,12.786885245901642,17.7049180327
ABAC	chr5	NonIntact	Tc1_Mariner_TIR_transposon	15.655737704918028,20.327868852459016,19.344262295081965,1.8032786885245917,21.229508196721312,22.54098360655738,16.885245901639344,17.704918032786882,15.163934426229511,24.262295081967217,17.950819672131143,20.573770491803277,20.491803278688526,19.754098360655735,22.295081967213118,17.540983606557372,16.147540983606554,24.50819672131148,14.590163934426233,15.000000000000004,14.098360655737707,10…
ABAC	chr6	NonIntact	Copia_LTR_retrotransposon	4.9180327868852505,11.311475409836067,16.0655737704918,17.62295081967213,2.8688524590163964,11.147540983606559,9.918032786885245,5.573770491803274,7.704918032786884,15.245901639344268,16.72131147540983,16.63934426229508,16.0655737704918,12.131147540983608
ABAC	chr6	NonIntact	Mutator_TIR_transposon	5.819672131147537,1.393442622950821,1.0655737704918042,0.98360655737705,11.885245901639346,10.327868852459018,15.000000000000004,8.442622950819672,8.442622950819672,16.63934426229508,12.95081967213115,9.508196721311474,10.901639344262296,10.40983606557377
ABAC	chr6	NonIntact	helitron	15.737704918032781,21.803278688524593,11.147540983606559,4.344262295081971,4.344262295081971,1.8852459016393461,20.655737704918035,18.360655737704917,16.147540983606554,21.803278688524593,22.131147540983605,12.54098360655738,20.655737704918035,18.85245901
ABAC	chr6	NonIntact	hAT_TIR_transposon	1.0655737704918042,17.950819672131143,16.31147540983606,11.229508196721312,17.29508196721311,10.98360655737705,17.29508196721311,11.967213114754099,18.524590163934423,9.262295081967212,13.196721311475413,3.360655737704921,12.786885245901642,12.45901639344
ABAC	chr6	NonIntact	PIF_Harbinger_TIR_transposon	14.91803278688525,16.557377049180324,24.34426229508197,12.213114754098363,14.50819672131148,17.1311475409836,16.47540983606557,19.754098360655735,3.852459016393446,3.1147540983606588,5.655737704918029,5.983606557377045,16.967213114754095,11.065573770491802,9.180327868852459,13.196721311475413,13.36065573770492,19.42622950819672,12.54098360655738,11.065573770491802,21.639344262295083,11.3934426229…
ABAC	chr6	NonIntact	LTR_retrotransposon	15.819672131147538,9.01639344262295,17.45901639344262,12.54098360655738,7.704918032786884,7.377049180327866,12.459016393442624,13.032786885245905,14.91803278688525,6.721311475409832,11.80327868852459,12.37704918032787,15.655737704918028,15.245901639344268
ABAC	chr6	NonIntact	CACTA_TIR_transposon	10.0,16.557377049180324,23.27868852459017,15.983606557377046,10.327868852459018,21.311475409836063,18.770491803278688,21.147540983606557,23.36065573770492,23.77049180327869,15.819672131147538,22.131147540983605,16.147540983606554,16.22950819672131,22.4590
ABAC	chr6	NonIntact	Gypsy_LTR_retrotransposon	4.180327868852463,12.622950819672134,19.508196721311474,2.786885245901642,24.590163934426233,20.81967213114754,21.065573770491806,20.163934426229506,12.131147540983608,6.147540983606554,17.540983606557372,22.049180327868854,13.688524590163937,18.852459016
ABAC	chr6	NonIntact	Tc1_Mariner_TIR_transposon	14.50819672131148,13.606557377049183,20.901639344262293,12.459016393442624,13.852459016393446,9.918032786885245,12.868852459016395,19.18032786885246,16.557377049180324,11.311475409836067,10.40983606557377,19.508196721311474,20.163934426229506,16.803278688524586,16.803278688524586,18.770491803278688,20.901639344262293,18.442622950819672,10.573770491803279,10.327868852459018,12.295081967213116,20.0…
ABAC	chr7	NonIntact	Mutator_TIR_transposon	15.49180327868852,19.01639344262295,14.91803278688525,1.6393442622950833,19.01639344262295,16.147540983606554,19.01639344262295,20.737704918032787,1.0655737704918042,19.59016393442623,17.704918032786882,17.950819672131143,13.524590163934429,11.22950819672
ABAC	chr7	NonIntact	Gypsy_LTR_retrotransposon	12.704918032786887,22.54098360655738,19.42622950819672,1.0655737704918042,7.9508196721311455,14.590163934426233,10.0,19.83606557377049,23.68852459016394,8.360655737704915,10.819672131147541,9.59016393442623,15.819672131147538,10.163934426229508,22.8688524
ABAC	chr7	NonIntact	helitron	16.72131147540983,15.163934426229511,15.901639344262291,18.360655737704917,18.278688524590162,15.327868852459021,23.524590163934427,14.754098360655743,19.59016393442623,24.016393442622952,4.426229508196726,18.852459016393443,8.442622950819672,17.377049180
ABAC	chr7	NonIntact	Copia_LTR_retrotransposon	15.245901639344268,15.737704918032781,19.18032786885246,17.377049180327866,16.393442622950815,14.672131147540988,20.40983606557377,21.475409836065577,18.0327868852459,18.524590163934423,19.508196721311474,19.344262295081965,17.1311475409836,17.78688524590
ABAC	chr7	NonIntact	LTR_retrotransposon	13.442622950819676,13.196721311475413,5.901639344262291,8.360655737704915,8.0327868852459,9.754098360655737,8.442622950819672,9.344262295081966,4.426229508196726,4.50819672131148,4.672131147540988,9.918032786885245,9.426229508196721,5.819672131147537,5.81
ABAC	chr7	NonIntact	CACTA_TIR_transposon	15.573770491803273,19.18032786885246,19.18032786885246,16.72131147540983,12.37704918032787,11.475409836065575,15.163934426229511,15.49180327868852,8.524590163934425,17.1311475409836,11.721311475409838,18.524590163934423,21.721311475409834,24.5901639344262
ABAC	chr7	NonIntact	Tc1_Mariner_TIR_transposon	14.91803278688525,20.081967213114755,14.91803278688525,15.901639344262291,17.950819672131143,18.442622950819672,15.573770491803273,14.672131147540988,11.229508196721312,16.557377049180324,17.377049180327866,13.114754098360658,11.639344262295085,17.950819672131143,23.852459016393446,23.36065573770492,18.442622950819672,14.344262295081972,19.01639344262295,16.803278688524586,13.442622950819676,16.8…
ABAC	chr7	NonIntact	hAT_TIR_transposon	15.983606557377046,11.229508196721312,10.245901639344263,15.245901639344268,7.622950819672129,4.262295081967217,14.91803278688525,5.000000000000004,13.114754098360658,9.344262295081966,16.47540983606557,9.01639344262295,24.34426229508197,4.754098360655742
ABAC	chr7	NonIntact	PIF_Harbinger_TIR_transposon	20.901639344262293,2.8688524590163964,13.196721311475413,8.524590163934425,13.114754098360658,13.770491803278691,17.04918032786885,17.377049180327866,18.524590163934423,22.37704918032787,17.62295081967213,15.163934426229511,8.196721311475407,9.672131147540982,18.114754098360653,18.524590163934423,17.950819672131143,14.180327868852462,20.163934426229506,16.557377049180324,19.508196721311474,18.032…
ABAC	chr8	NonIntact	Mutator_TIR_transposon	15.245901639344268,15.409836065573767,15.655737704918028,7.868852459016391,8.360655737704915,14.016393442622954,13.114754098360658,6.721311475409832,11.065573770491802,16.47540983606557,14.91803278688525,22.049180327868854,11.065573770491802,15.4918032786
ABAC	chr8	NonIntact	helitron	12.213114754098363,21.721311475409834,19.262295081967213,20.655737704918035,7.459016393442621,22.131147540983605,10.327868852459018,6.885245901639341,1.9672131147541,17.04918032786885,2.7049180327868876,15.163934426229511,17.45901639344262,10.163934426229
ABAC	chr8	NonIntact	LTR_retrotransposon	8.196721311475407,13.770491803278691,18.442622950819672,19.672131147540984,14.672131147540988,8.688524590163933,15.655737704918028,4.590163934426233,2.8688524590163964,9.344262295081966,3.852459016393446,6.885245901639341,19.59016393442623,6.9672131147540
ABAC	chr8	NonIntact	Copia_LTR_retrotransposon	7.377049180327866,15.163934426229511,15.737704918032781,8.770491803278686,16.22950819672131,19.262295081967213,15.655737704918028,15.901639344262291,7.786885245901637,18.606557377049178,19.0983606557377,9.672131147540982,8.524590163934425,12.9508196721311
ABAC	chr8	NonIntact	hAT_TIR_transposon	7.868852459016391,6.4754098360655705,7.131147540983603,17.04918032786885,4.8360655737704965,20.737704918032787,11.557377049180328,14.426229508196725,8.934426229508196,7.704918032786884,8.934426229508196,11.475409836065575,23.68852459016394,15.409836065573
ABAC	chr8	NonIntact	PIF_Harbinger_TIR_transposon	17.1311475409836,16.47540983606557,21.9672131147541,17.540983606557372,20.327868852459016,11.065573770491802,9.59016393442623,20.655737704918035,23.68852459016394,21.803278688524593,19.672131147540984,18.360655737704917,19.01639344262295,9.344262295081966,11.39344262295082,14.262295081967215,10.655737704918032,13.032786885245905,16.885245901639344,20.737704918032787,14.590163934426233,18.11475409…
ABAC	chr8	NonIntact	CACTA_TIR_transposon	8.278688524590162,18.442622950819672,8.60655737704918,6.5573770491803245,11.229508196721312,9.262295081967212,18.770491803278688,17.786885245901637,10.163934426229508,23.524590163934427,7.868852459016391,13.278688524590166,21.475409836065577,17.9508196721
ABAC	chr8	NonIntact	Gypsy_LTR_retrotransposon	12.459016393442624,12.459016393442624,11.967213114754099,12.131147540983608,2.5409836065573796,8.114754098360654,17.950819672131143,21.393442622950822,17.1311475409836,5.000000000000004,15.819672131147538,10.40983606557377,13.36065573770492,18.60655737704
ABAC	chr8	NonIntact	Tc1_Mariner_TIR_transposon	16.803278688524586,16.47540983606557,9.836065573770492,23.68852459016394,15.573770491803273,12.704918032786887,13.606557377049183,17.1311475409836,17.1311475409836,16.22950819672131,11.311475409836067,14.262295081967215,18.606557377049178,24.590163934426233,23.27868852459017,9.59016393442623,17.704918032786882,11.721311475409838,21.065573770491806,22.622950819672134,17.540983606557372,14.59016393…
ABAC	chr9	NonIntact	CACTA_TIR_transposon	17.540983606557372,17.45901639344262,22.295081967213118,10.491803278688524,13.36065573770492,15.000000000000004,11.39344262295082,20.327868852459016,8.770491803278686,14.098360655737707,21.721311475409834,13.032786885245905,9.918032786885245,7.62295081967
ABAC	chr9	NonIntact	Copia_LTR_retrotransposon	2.377049180327871,9.098360655737704,19.0983606557377,14.016393442622954,16.31147540983606,15.737704918032781,8.196721311475407,13.032786885245905,14.180327868852462,3.6065573770491834,12.131147540983608,7.04918032786885,11.229508196721312,9.42622950819672
ABAC	chr9	NonIntact	LTR_retrotransposon	13.196721311475413,13.032786885245905,4.590163934426233,8.114754098360654,6.803278688524587,16.557377049180324,12.95081967213115,15.573770491803273,8.0327868852459,9.426229508196721,10.573770491803279,7.622950819672129,13.934426229508201,9.836065573770492
ABAC	chr9	NonIntact	helitron	2.2950819672131164,15.573770491803273,9.672131147540982,5.573770491803274,19.344262295081965,17.04918032786885,21.229508196721312,16.0655737704918,13.442622950819676,13.852459016393446,11.885245901639346,15.409836065573767,10.40983606557377,9.262295081967
ABAC	chr9	NonIntact	PIF_Harbinger_TIR_transposon	16.803278688524586,18.278688524590162,14.754098360655743,19.918032786885245,22.213114754098363,12.295081967213116,22.131147540983605,21.229508196721312,16.885245901639344,21.065573770491806,17.786885245901637,18.196721311475407,19.42622950819672,18.524590163934423,12.54098360655738,18.114754098360653,8.770491803278686,15.000000000000004,16.885245901639344,19.918032786885245,21.147540983606557,18.…
ABAC	chr9	NonIntact	Mutator_TIR_transposon	15.409836065573767,13.770491803278691,14.426229508196725,19.18032786885246,19.18032786885246,13.688524590163937,3.852459016393446,7.704918032786884,13.606557377049183,15.163934426229511,3.0327868852459043,8.688524590163933,17.21311475409836,13.44262295081
ABAC	chr9	NonIntact	hAT_TIR_transposon	16.803278688524586,19.344262295081965,20.081967213114755,8.360655737704915,6.229508196721308,2.2950819672131164,2.1311475409836085,6.229508196721308,11.967213114754099,13.278688524590166,21.229508196721312,10.573770491803279,12.37704918032787,17.540983606
ABAC	chr9	NonIntact	Gypsy_LTR_retrotransposon	12.213114754098363,4.754098360655742,4.672131147540988,8.60655737704918,13.688524590163937,15.081967213114758,15.901639344262291,15.081967213114758,14.50819672131148,13.934426229508201,14.50819672131148,13.36065573770492,13.934426229508201,15.081967213114
ABAC	chr9	NonIntact	Tc1_Mariner_TIR_transposon	23.27868852459017,15.081967213114758,13.852459016393446,11.80327868852459,18.606557377049178,13.36065573770492,17.45901639344262,14.262295081967215,20.081967213114755,21.721311475409834,9.672131147540982,19.0983606557377,21.311475409836063,16.22950819672131,19.262295081967213,20.163934426229506,19.59016393442623,16.0655737704918,22.295081967213118,11.311475409836067,23.19672131147541,19.754098360…
ABAC	chrX	NonIntact	Gypsy_LTR_retrotransposon	22.049180327868854,21.147540983606557,18.0327868852459,20.737704918032787,13.524590163934429,16.557377049180324,15.245901639344268,7.04918032786885,14.262295081967215,15.081967213114758,18.606557377049178,11.147540983606559,12.622950819672134,16.311475409
ABAC	chrX	NonIntact	Mutator_TIR_transposon	17.786885245901637,16.393442622950815,16.393442622950815,20.327868852459016,20.163934426229506,17.540983606557372,15.409836065573767,22.295081967213118,11.721311475409838,21.639344262295083,19.18032786885246,13.278688524590166,11.229508196721312,14.508196
ABAC	chrX	NonIntact	CACTA_TIR_transposon	19.0983606557377,14.836065573770496,14.91803278688525,22.213114754098363,16.22950819672131,21.229508196721312,16.557377049180324,14.50819672131148,17.950819672131143,4.344262295081971,6.311475409836063,11.229508196721312,22.95081967213115,14.0163934426229
ABAC	chrX	NonIntact	helitron	11.065573770491802,8.688524590163933,18.606557377049178,8.688524590163933,15.081967213114758,0.98360655737705,4.754098360655742,17.04918032786885,17.704918032786882,17.86885245901639,18.852459016393443,11.475409836065575,17.86885245901639,21.6393442622950
ABAC	chrX	NonIntact	PIF_Harbinger_TIR_transposon	18.0327868852459,20.901639344262293,21.475409836065577,5.573770491803274,9.754098360655737,22.049180327868854,17.21311475409836,9.754098360655737,12.37704918032787,7.704918032786884,17.29508196721311,21.147540983606557,12.622950819672134,10.98360655737705,16.47540983606557,9.426229508196721,21.639344262295083,24.426229508196727,14.50819672131148,15.655737704918028,21.393442622950822,20.1639344262…
ABAC	chrX	NonIntact	Copia_LTR_retrotransposon	16.72131147540983,5.901639344262291,17.704918032786882,20.81967213114754,16.47540983606557,17.04918032786885,12.37704918032787,13.114754098360658,10.819672131147541,16.72131147540983,19.18032786885246,12.95081967213115,18.196721311475407,10.16393442622950
ABAC	chrX	NonIntact	LTR_retrotransposon	6.393442622950817,9.180327868852459,10.163934426229508,7.295081967213112,6.147540983606554,14.672131147540988,11.065573770491802,11.967213114754099,9.508196721311474,12.868852459016395,21.393442622950822,17.704918032786882,18.524590163934423,10.4098360655
ABAC	chrX	NonIntact	hAT_TIR_transposon	21.229508196721312,21.639344262295083,21.475409836065577,12.704918032786887,11.147540983606559,6.721311475409832,14.672131147540988,14.672131147540988,13.852459016393446,8.852459016393441,8.852459016393441,16.147540983606554,7.540983606557375,18.770491803
ABAC	chrX	NonIntact	Tc1_Mariner_TIR_transposon	19.508196721311474,16.72131147540983,16.72131147540983,23.19672131147541,18.196721311475407,20.0,15.245901639344268,16.885245901639344,18.442622950819672,21.475409836065577,13.278688524590166,19.344262295081965,14.754098360655743,11.39344262295082,11.557377049180328,12.459016393442624,10.40983606557377,12.868852459016395,11.967213114754099,18.0327868852459,18.0327868852459,17.950819672131143,11.8…
AH3Ma	chr1	NonIntact	Copia_LTR_retrotransposon	3.688524590163938,0.98360655737705,8.0327868852459,9.01639344262295,20.81967213114754,0.6557377049180333,3.360655737704921,1.9672131147541,7.9508196721311455,12.049180327868855,4.590163934426233,9.426229508196721,11.721311475409838,4.180327868852463,5.163
AH3Ma	chr1	NonIntact	Mutator_TIR_transposon	15.409836065573767,1.8032786885245917,15.409836065573767,17.704918032786882,17.540983606557372,13.524590163934429,15.081967213114758,19.262295081967213,21.311475409836063,4.344262295081971,17.950819672131143,13.524590163934429,3.6065573770491834,23.442622
AH3Ma	chr1	NonIntact	Gypsy_LTR_retrotransposon	3.7704918032786923,8.196721311475407,18.606557377049178,7.04918032786885,7.540983606557375,9.508196721311474,11.065573770491802,11.311475409836067,20.573770491803277,15.245901639344268,15.245901639344268,15.49180327868852,10.327868852459018,12.78688524590
AH3Ma	chr1	NonIntact	LTR_retrotransposon	4.180327868852463,5.819672131147537,3.4426229508196755,3.1967213114754123,3.4426229508196755,13.278688524590166,17.377049180327866,14.426229508196725,13.114754098360658,6.967213114754096,14.426229508196725,15.819672131147538,14.426229508196725,15.57377049
AH3Ma	chr1	NonIntact	hAT_TIR_transposon	13.934426229508201,9.754098360655737,19.754098360655735,15.901639344262291,8.360655737704915,7.540983606557375,15.655737704918028,17.704918032786882,15.49180327868852,17.29508196721311,15.655737704918028,15.737704918032781,12.131147540983608,19.7540983606
AH3Ma	chr1	NonIntact	CACTA_TIR_transposon	20.327868852459016,21.475409836065577,19.18032786885246,22.70491803278689,11.147540983606559,12.131147540983608,9.01639344262295,14.754098360655743,19.59016393442623,19.42622950819672,16.22950819672131,19.59016393442623,8.114754098360654,15.98360655737704
AH3Ma	chr1	NonIntact	helitron	15.163934426229511,11.967213114754099,14.098360655737707,9.180327868852459,14.672131147540988,14.590163934426233,13.196721311475413,12.868852459016395,13.852459016393446,15.983606557377046,10.655737704918032,13.278688524590166,10.901639344262296,14.016393
AH3Ma	chr1	NonIntact	PIF_Harbinger_TIR_transposon	21.475409836065577,13.032786885245905,13.770491803278691,19.59016393442623,20.40983606557377,20.0,23.60655737704918,14.672131147540988,17.1311475409836,21.803278688524593,22.622950819672134,8.278688524590162,10.655737704918032,17.21311475409836,17.6229508
AH3Ma	chr1	NonIntact	Tc1_Mariner_TIR_transposon	17.786885245901637,7.131147540983603,8.688524590163933,20.40983606557377,20.81967213114754,23.77049180327869,21.393442622950822,10.081967213114753,23.442622950819676,17.704918032786882,17.786885245901637,20.163934426229506,16.885245901639344,18.278688524590162,16.0655737704918,19.344262295081965,16.22950819672131,20.0,22.78688524590164,13.606557377049183,15.409836065573767,13.852459016393446,12.4…
AH3Ma	chr2	NonIntact	Mutator_TIR_transposon	2.213114754098363,15.49180327868852,6.311475409836063,16.0655737704918,6.5573770491803245,15.49180327868852,7.868852459016391,15.573770491803273,6.5573770491803245,15.409836065573767,7.868852459016391,15.49180327868852,5.901639344262291,13.278688524590166
AH3Ma	chr2	NonIntact	helitron	15.000000000000004,11.311475409836067,13.196721311475413,17.786885245901637,12.786885245901642,11.39344262295082,19.672131147540984,16.885245901639344,19.59016393442623,20.491803278688526,19.18032786885246,14.098360655737707,13.934426229508201,16.96721311
AH3Ma	chr2	NonIntact	LTR_retrotransposon	17.704918032786882,5.081967213114759,4.754098360655742,9.180327868852459,8.688524590163933,11.80327868852459,17.04918032786885,15.409836065573767,9.836065573770492,12.786885245901642,21.639344262295083,19.83606557377049,15.573770491803273,10.8196721311475
AH3Ma	chr2	NonIntact	Copia_LTR_retrotransposon	9.098360655737704,2.049180327868854,4.8360655737704965,18.114754098360653,14.426229508196725,21.885245901639347,21.065573770491806,19.18032786885246,2.5409836065573796,16.22950819672131,2.377049180327871,19.18032786885246,10.819672131147541,7.377049180327
AH3Ma	chr2	NonIntact	CACTA_TIR_transposon	20.491803278688526,16.22950819672131,15.327868852459021,4.098360655737708,19.672131147540984,20.81967213114754,21.475409836065577,19.918032786885245,22.131147540983605,18.934426229508194,17.704918032786882,14.836065573770496,14.672131147540988,13.77049180
AH3Ma	chr2	NonIntact	hAT_TIR_transposon	16.22950819672131,4.262295081967217,10.081967213114753,10.245901639344263,13.770491803278691,15.573770491803273,18.278688524590162,15.409836065573767,11.557377049180328,16.885245901639344,13.688524590163937,16.22950819672131,19.508196721311474,16.96721311
AH3Ma	chr2	NonIntact	Gypsy_LTR_retrotransposon	14.754098360655743,17.45901639344262,7.213114754098358,9.672131147540982,15.655737704918028,24.016393442622952,18.524590163934423,17.62295081967213,15.000000000000004,3.2786885245901667,3.4426229508196755,13.934426229508201,0.40983606557377084,2.377049180
AH3Ma	chr2	NonIntact	PIF_Harbinger_TIR_transposon	13.524590163934429,14.590163934426233,14.262295081967215,16.557377049180324,16.63934426229508,20.163934426229506,22.95081967213115,20.901639344262293,10.245901639344263,24.016393442622952,20.491803278688526,19.508196721311474,18.606557377049178,7.45901639
AH3Ma	chr2	NonIntact	Tc1_Mariner_TIR_transposon	20.163934426229506,16.31147540983606,18.770491803278688,15.901639344262291,12.704918032786887,15.983606557377046,17.377049180327866,16.72131147540983,10.98360655737705,12.868852459016395,15.573770491803273,21.475409836065577,23.60655737704918,7.459016393442621,19.01639344262295,18.0327868852459,21.065573770491806,18.114754098360653,11.39344262295082,21.639344262295083,18.524590163934423,22.131147…
AH3Ma	chr3	NonIntact	Copia_LTR_retrotransposon	10.491803278688524,5.819672131147537,10.163934426229508,5.49180327868852,21.557377049180328,14.91803278688525,19.18032786885246,14.754098360655743,23.77049180327869,15.901639344262291,17.1311475409836,20.737704918032787,18.688524590163933,22.9508196721311
AH3Ma	chr3	NonIntact	hAT_TIR_transposon	15.163934426229511,17.62295081967213,18.196721311475407,24.426229508196727,15.49180327868852,23.852459016393446,16.72131147540983,11.229508196721312,14.836065573770496,14.754098360655743,13.852459016393446,14.016393442622954,18.934426229508194,19.09836065
AH3Ma	chr3	NonIntact	Gypsy_LTR_retrotransposon	8.360655737704915,19.344262295081965,8.688524590163933,23.27868852459017,17.786885245901637,24.262295081967217,23.60655737704918,6.721311475409832,6.311475409836063,8.114754098360654,8.114754098360654,4.262295081967217,19.262295081967213,13.03278688524590
AH3Ma	chr3	NonIntact	PIF_Harbinger_TIR_transposon	23.852459016393446,18.0327868852459,18.114754098360653,22.95081967213115,17.377049180327866,12.295081967213116,6.885245901639341,6.885245901639341,15.983606557377046,12.295081967213116,20.491803278688526,13.032786885245905,21.557377049180328,15.4098360655
AH3Ma	chr3	NonIntact	Mutator_TIR_transposon	19.18032786885246,21.557377049180328,17.540983606557372,18.524590163934423,18.934426229508194,14.754098360655743,23.60655737704918,16.0655737704918,16.885245901639344,17.704918032786882,18.688524590163933,21.393442622950822,18.114754098360653,11.147540983
AH3Ma	chr3	NonIntact	LTR_retrotransposon	14.672131147540988,16.967213114754095,15.655737704918028,2.213114754098363,22.459016393442624,1.0655737704918042,11.065573770491802,4.9180327868852505,0.9016393442622959,3.2786885245901667,2.4590163934426252,17.45901639344262,14.754098360655743,17.2950819
AH3Ma	chr3	NonIntact	CACTA_TIR_transposon	17.704918032786882,12.54098360655738,21.475409836065577,14.262295081967215,22.37704918032787,14.180327868852462,13.114754098360658,20.40983606557377,21.065573770491806,21.639344262295083,21.639344262295083,8.278688524590162,10.0,12.131147540983608,13.8524
AH3Ma	chr3	NonIntact	helitron	18.688524590163933,23.27868852459017,19.344262295081965,18.770491803278688,24.50819672131148,14.016393442622954,16.147540983606554,9.508196721311474,14.672131147540988,17.540983606557372,18.114754098360653,21.393442622950822,10.245901639344263,19.18032786
AH3Ma	chr3	NonIntact	Tc1_Mariner_TIR_transposon	20.983606557377048,13.442622950819676,16.393442622950815,18.524590163934423,19.59016393442623,15.245901639344268,14.016393442622954,14.50819672131148,16.0655737704918,17.86885245901639,15.819672131147538,16.803278688524586,12.868852459016395,9.918032786885245,14.262295081967215,19.18032786885246,15.901639344262291,17.950819672131143,17.29508196721311,9.262295081967212,2.786885245901642,4.83606557…
AH3Ma	chr4	NonIntact	Mutator_TIR_transposon	15.409836065573767,2.049180327868854,15.409836065573767,18.442622950819672,23.934426229508198,17.21311475409836,16.557377049180324,16.47540983606557,10.40983606557377,17.1311475409836,21.229508196721312,19.918032786885245,16.47540983606557,17.622950819672
AH3Ma	chr4	NonIntact	hAT_TIR_transposon	9.918032786885245,2.786885245901642,17.786885245901637,0.9016393442622959,16.22950819672131,18.442622950819672,14.426229508196725,13.606557377049183,15.737704918032781,6.065573770491799,9.01639344262295,16.31147540983606,13.032786885245905,15.327868852459
AH3Ma	chr4	NonIntact	helitron	11.311475409836067,15.655737704918028,13.524590163934429,10.901639344262296,20.245901639344265,13.278688524590166,19.344262295081965,0.491803278688525,13.196721311475413,19.59016393442623,21.147540983606557,23.852459016393446,10.40983606557377,13.27868852
AH3Ma	chr4	NonIntact	Gypsy_LTR_retrotransposon	4.672131147540988,13.032786885245905,3.1967213114754123,18.196721311475407,3.4426229508196755,17.21311475409836,13.770491803278691,19.754098360655735,9.262295081967212,10.655737704918032,15.327868852459021,13.934426229508201,6.6393442622950785,11.63934426
AH3Ma	chr4	NonIntact	PIF_Harbinger_TIR_transposon	12.131147540983608,19.918032786885245,17.377049180327866,5.081967213114759,20.81967213114754,6.967213114754096,16.803278688524586,11.885245901639346,12.049180327868855,15.081967213114758,22.78688524590164,4.8360655737704965,23.19672131147541,8.852459016393441,16.47540983606557,16.47540983606557,20.737704918032787,24.180327868852462,22.95081967213115,8.524590163934425,22.295081967213118,5.81967213…
AH3Ma	chr4	NonIntact	LTR_retrotransposon	11.475409836065575,22.459016393442624,16.72131147540983,11.147540983606559,11.80327868852459,14.344262295081972,9.754098360655737,13.524590163934429,8.852459016393441,18.934426229508194,7.868852459016391,15.983606557377046,2.1311475409836085,0.40983606557
AH3Ma	chr4	NonIntact	CACTA_TIR_transposon	18.442622950819672,14.754098360655743,20.245901639344265,6.803278688524587,6.311475409836063,17.21311475409836,11.967213114754099,0.7377049180327875,17.950819672131143,3.1967213114754123,13.852459016393446,10.163934426229508,21.147540983606557,18.93442622
AH3Ma	chr4	NonIntact	Copia_LTR_retrotransposon	20.655737704918035,15.163934426229511,6.065573770491799,3.2786885245901667,19.01639344262295,6.721311475409832,2.213114754098363,3.688524590163938,2.786885245901642,6.721311475409832,2.8688524590163964,4.426229508196726,2.7049180327868876,10.5737704918032
AH3Ma	chr4	NonIntact	Tc1_Mariner_TIR_transposon	19.508196721311474,12.459016393442624,12.295081967213116,14.426229508196725,16.0655737704918,17.950819672131143,22.37704918032787,13.032786885245905,14.836065573770496,15.901639344262291,6.4754098360655705,15.409836065573767,10.573770491803279,17.540983606557372,20.81967213114754,10.573770491803279,19.672131147540984,16.31147540983606,21.639344262295083,19.0983606557377,19.672131147540984,18.9344…
AH3Ma	chr5	NonIntact	Mutator_TIR_transposon	2.2950819672131164,15.163934426229511,14.262295081967215,19.42622950819672,3.6065573770491834,20.0,17.540983606557372,17.786885245901637,10.819672131147541,22.70491803278689,18.114754098360653,17.21311475409836,17.29508196721311,21.9672131147541,9.9180327
AH3Ma	chr5	NonIntact	LTR_retrotransposon	17.1311475409836,14.754098360655743,18.688524590163933,19.918032786885245,9.426229508196721,10.737704918032788,8.770491803278686,5.081967213114759,3.0327868852459043,8.60655737704918,2.8688524590163964,8.852459016393441,20.40983606557377,9.344262295081966
AH3Ma	chr5	NonIntact	Copia_LTR_retrotransposon	14.016393442622954,17.29508196721311,22.622950819672134,14.262295081967215,8.196721311475407,10.901639344262296,0.7377049180327875,17.29508196721311,19.508196721311474,0.7377049180327875,17.29508196721311,4.344262295081971,22.622950819672134,18.9344262295
AH3Ma	chr5	NonIntact	Gypsy_LTR_retrotransposon	14.180327868852462,18.934426229508194,4.590163934426233,17.540983606557372,8.442622950819672,15.327868852459021,11.557377049180328,6.721311475409832,8.0327868852459,15.49180327868852,12.95081967213115,4.344262295081971,4.754098360655742,8.688524590163933,
AH3Ma	chr5	NonIntact	hAT_TIR_transposon	9.01639344262295,16.393442622950815,7.540983606557375,4.50819672131148,2.95081967213115,22.049180327868854,18.688524590163933,8.196721311475407,18.0327868852459,6.803278688524587,7.540983606557375,14.91803278688525,8.114754098360654,13.770491803278691,20.
AH3Ma	chr5	NonIntact	PIF_Harbinger_TIR_transposon	16.803278688524586,18.934426229508194,16.72131147540983,21.475409836065577,21.229508196721312,12.295081967213116,17.86885245901639,22.95081967213115,14.590163934426233,18.196721311475407,17.86885245901639,16.803278688524586,6.147540983606554,14.50819672131148,20.245901639344265,17.86885245901639,16.22950819672131,17.950819672131143,18.606557377049178,15.655737704918028,21.147540983606557,20.90163…
AH3Ma	chr5	NonIntact	helitron	15.573770491803273,8.278688524590162,10.901639344262296,21.475409836065577,20.737704918032787,16.0655737704918,20.0,20.40983606557377,17.786885245901637,15.081967213114758,14.426229508196725,18.852459016393443,11.967213114754099,9.262295081967212,16.31147
AH3Ma	chr5	NonIntact	CACTA_TIR_transposon	10.819672131147541,19.344262295081965,21.557377049180328,2.1311475409836085,8.852459016393441,24.09836065573771,23.60655737704918,16.22950819672131,17.1311475409836,18.196721311475407,14.016393442622954,21.885245901639347,20.163934426229506,3.360655737704
AH3Ma	chr5	NonIntact	Tc1_Mariner_TIR_transposon	9.672131147540982,12.622950819672134,12.459016393442624,15.163934426229511,16.803278688524586,16.967213114754095,21.885245901639347,19.42622950819672,16.31147540983606,17.786885245901637,17.704918032786882,13.934426229508201,24.016393442622952,12.459016393442624,9.262295081967212,21.557377049180328,16.967213114754095,18.196721311475407,21.065573770491806,17.1311475409836,19.754098360655735,11.393…
AH3Ma	chr6	NonIntact	Mutator_TIR_transposon	14.344262295081972,9.180327868852459,14.262295081967215,14.590163934426233,15.901639344262291,3.1967213114754123,15.901639344262291,4.672131147540988,3.6065573770491834,15.655737704918028,5.081967213114759,14.672131147540988,4.8360655737704965,15.24590163
AH3Ma	chr6	NonIntact	LTR_retrotransposon	5.49180327868852,16.31147540983606,14.91803278688525,15.49180327868852,16.0655737704918,14.180327868852462,4.180327868852463,15.901639344262291,16.31147540983606,3.360655737704921,19.01639344262295,13.934426229508201,6.229508196721308,13.524590163934429,1
AH3Ma	chr6	NonIntact	hAT_TIR_transposon	20.081967213114755,20.0,15.409836065573767,17.704918032786882,14.262295081967215,15.163934426229511,6.393442622950817,7.04918032786885,2.8688524590163964,3.9344262295082,6.229508196721308,15.983606557377046,4.180327868852463,9.098360655737704,16.557377049
AH3Ma	chr6	NonIntact	CACTA_TIR_transposon	23.19672131147541,22.049180327868854,13.770491803278691,9.180327868852459,17.1311475409836,18.196721311475407,14.016393442622954,22.37704918032787,20.655737704918035,18.770491803278688,20.163934426229506,9.508196721311474,20.983606557377048,16.63934426229
AH3Ma	chr6	NonIntact	helitron	14.590163934426233,12.622950819672134,14.262295081967215,19.01639344262295,14.91803278688525,15.000000000000004,14.016393442622954,22.78688524590164,18.114754098360653,21.639344262295083,14.672131147540988,16.557377049180324,14.836065573770496,16.31147540
AH3Ma	chr6	NonIntact	Copia_LTR_retrotransposon	3.7704918032786923,1.9672131147541,4.098360655737708,7.377049180327866,18.770491803278688,16.803278688524586,6.967213114754096,4.344262295081971,7.868852459016391,7.213114754098358,12.049180327868855,9.262295081967212,4.180327868852463,19.344262295081965,
AH3Ma	chr6	NonIntact	Gypsy_LTR_retrotransposon	5.1639344262295035,18.114754098360653,9.098360655737704,11.557377049180328,7.540983606557375,6.803278688524587,10.491803278688524,10.40983606557377,6.229508196721308,16.31147540983606,8.360655737704915,4.016393442622954,6.721311475409832,21.80327868852459
AH3Ma	chr6	NonIntact	PIF_Harbinger_TIR_transposon	23.60655737704918,15.327868852459021,19.672131147540984,2.622950819672133,19.918032786885245,10.98360655737705,20.327868852459016,19.344262295081965,18.524590163934423,17.786885245901637,17.786885245901637,14.672131147540988,10.737704918032788,17.62295081967213,11.80327868852459,16.967213114754095,3.6065573770491834,18.196721311475407,12.37704918032787,21.9672131147541,22.868852459016395,14.18032…
AH3Ma	chr6	NonIntact	Tc1_Mariner_TIR_transposon	12.54098360655738,11.967213114754099,14.672131147540988,14.91803278688525,19.672131147540984,10.491803278688524,8.524590163934425,14.672131147540988,17.786885245901637,14.50819672131148,23.032786885245905,19.672131147540984,12.049180327868855,22.70491803278689,22.37704918032787,16.885245901639344,11.885245901639346,20.40983606557377,16.47540983606557,19.508196721311474,21.475409836065577,21.47540…
AH3Ma	chr7	NonIntact	Mutator_TIR_transposon	15.49180327868852,19.754098360655735,2.213114754098363,1.6393442622950833,12.786885245901642,19.01639344262295,1.6393442622950833,19.754098360655735,1.6393442622950833,19.262295081967213,19.262295081967213,23.27868852459017,10.737704918032788,10.819672131
AH3Ma	chr7	NonIntact	Gypsy_LTR_retrotransposon	14.50819672131148,5.655737704918029,19.344262295081965,2.786885245901642,5.000000000000004,9.344262295081966,18.114754098360653,3.7704918032786923,15.409836065573767,2.786885245901642,5.737704918032783,9.180327868852459,24.016393442622952,8.68852459016393
AH3Ma	chr7	NonIntact	hAT_TIR_transposon	14.91803278688525,14.672131147540988,15.081967213114758,14.91803278688525,18.114754098360653,5.49180327868852,7.295081967213112,5.983606557377045,14.262295081967215,5.409836065573766,12.54098360655738,5.081967213114759,4.098360655737708,13.032786885245905
AH3Ma	chr7	NonIntact	Tc1_Mariner_TIR_transposon	20.081967213114755,23.27868852459017,14.91803278688525,20.081967213114755,20.491803278688526,14.262295081967215,20.081967213114755,24.09836065573771,14.91803278688525,20.081967213114755,23.27868852459017,14.91803278688525,13.852459016393446,11.639344262295085,21.803278688524593,19.672131147540984,11.885245901639346,19.01639344262295,16.557377049180324,16.393442622950815,17.377049180327866,13.5245…
AH3Ma	chr7	NonIntact	helitron	19.83606557377049,20.163934426229506,19.754098360655735,22.54098360655738,18.360655737704917,13.770491803278691,17.04918032786885,16.22950819672131,6.885245901639341,16.967213114754095,13.032786885245905,21.311475409836063,19.754098360655735,20.4098360655
AH3Ma	chr7	NonIntact	CACTA_TIR_transposon	23.934426229508198,22.78688524590164,24.180327868852462,21.475409836065577,12.213114754098363,21.721311475409834,17.62295081967213,13.032786885245905,16.967213114754095,13.852459016393446,11.885245901639346,13.688524590163937,9.180327868852459,2.786885245
AH3Ma	chr7	NonIntact	Copia_LTR_retrotransposon	19.344262295081965,2.622950819672133,8.934426229508196,16.393442622950815,16.967213114754095,23.934426229508198,17.29508196721311,18.770491803278688,18.0327868852459,18.360655737704917,17.29508196721311,7.868852459016391,8.442622950819672,6.47540983606557
AH3Ma	chr7	NonIntact	LTR_retrotransposon	8.442622950819672,7.9508196721311455,19.01639344262295,10.327868852459018,11.065573770491802,9.262295081967212,13.524590163934429,10.901639344262296,13.032786885245905,7.213114754098358,3.524590163934429,7.540983606557375,8.0327868852459,11.55737704918032
AH3Ma	chr7	NonIntact	PIF_Harbinger_TIR_transposon	22.213114754098363,15.000000000000004,21.475409836065577,23.524590163934427,23.524590163934427,8.278688524590162,9.754098360655737,14.672131147540988,9.01639344262295,16.0655737704918,23.19672131147541,20.327868852459016,21.557377049180328,7.2131147540983
AH3Ma	chr8	NonIntact	Mutator_TIR_transposon	3.2786885245901667,15.245901639344268,15.409836065573767,15.655737704918028,3.1967213114754123,10.737704918032788,17.540983606557372,21.065573770491806,8.60655737704918,12.95081967213115,4.8360655737704965,11.639344262295085,11.557377049180328,14.01639344
AH3Ma	chr8	NonIntact	LTR_retrotransposon	1.475409836065575,14.590163934426233,9.754098360655737,19.18032786885246,19.672131147540984,15.655737704918028,6.4754098360655705,16.803278688524586,12.37704918032787,3.6065573770491834,17.1311475409836,5.081967213114759,17.86885245901639,12.9508196721311
AH3Ma	chr8	NonIntact	Gypsy_LTR_retrotransposon	5.983606557377045,7.213114754098358,17.21311475409836,9.180327868852459,9.508196721311474,11.557377049180328,6.6393442622950785,5.245901639344258,6.393442622950817,15.245901639344268,7.295081967213112,8.0327868852459,19.262295081967213,16.72131147540983,7
AH3Ma	chr8	NonIntact	Copia_LTR_retrotransposon	6.393442622950817,19.508196721311474,11.39344262295082,10.245901639344263,15.49180327868852,17.950819672131143,8.770491803278686,14.426229508196725,7.459016393442621,7.786885245901637,5.327868852459011,2.2950819672131164,18.688524590163933,0.6557377049180
AH3Ma	chr8	NonIntact	CACTA_TIR_transposon	19.59016393442623,16.803278688524586,12.95081967213115,24.180327868852462,6.147540983606554,9.262295081967212,8.688524590163933,7.704918032786884,9.426229508196721,11.885245901639346,8.278688524590162,18.196721311475407,17.950819672131143,18.5245901639344
AH3Ma	chr8	NonIntact	hAT_TIR_transposon	18.114754098360653,4.180327868852463,6.721311475409832,16.557377049180324,21.147540983606557,11.39344262295082,15.163934426229511,10.327868852459018,23.27868852459017,20.901639344262293,18.852459016393443,15.409836065573767,22.622950819672134,14.754098360
AH3Ma	chr8	NonIntact	PIF_Harbinger_TIR_transposon	18.278688524590162,11.639344262295085,16.147540983606554,18.688524590163933,14.426229508196725,4.426229508196726,11.065573770491802,9.180327868852459,22.54098360655738,14.262295081967215,13.688524590163937,16.967213114754095,14.016393442622954,21.229508196721312,14.180327868852462,10.081967213114753,15.573770491803273,23.68852459016394,20.081967213114755,22.37704918032787,15.573770491803273,8.770…
AH3Ma	chr8	NonIntact	helitron	14.91803278688525,10.98360655737705,14.098360655737707,18.442622950819672,15.983606557377046,10.245901639344263,16.31147540983606,16.885245901639344,13.934426229508201,10.819672131147541,16.557377049180324,17.540983606557372,15.819672131147538,19.91803278
AH3Ma	chr8	NonIntact	Tc1_Mariner_TIR_transposon	10.98360655737705,13.442622950819676,11.639344262295085,19.672131147540984,14.590163934426233,20.573770491803277,20.983606557377048,17.86885245901639,13.278688524590166,20.983606557377048,17.86885245901639,13.278688524590166,4.50819672131148,13.032786885245905,11.80327868852459,14.672131147540988,13.524590163934429,18.196721311475407,16.72131147540983,14.344262295081972,23.934426229508198,16.4754…
AH3Ma	chr9	NonIntact	Mutator_TIR_transposon	2.95081967213115,15.409836065573767,3.852459016393446,7.9508196721311455,22.049180327868854,13.278688524590166,6.885245901639341,8.524590163934425,20.327868852459016,13.770491803278691,7.540983606557375,6.229508196721308,13.442622950819676,13.278688524590
AH3Ma	chr9	NonIntact	LTR_retrotransposon	3.0327868852459043,18.360655737704917,6.065573770491799,4.098360655737708,17.377049180327866,16.47540983606557,13.606557377049183,16.967213114754095,16.803278688524586,8.278688524590162,4.426229508196726,6.393442622950817,18.688524590163933,19.83606557377
AH3Ma	chr9	NonIntact	hAT_TIR_transposon	18.934426229508194,13.442622950819676,10.081967213114753,5.983606557377045,19.83606557377049,4.8360655737704965,9.836065573770492,11.80327868852459,11.065573770491802,7.786885245901637,14.262295081967215,14.836065573770496,14.50819672131148,16.06557377049
AH3Ma	chr9	NonIntact	CACTA_TIR_transposon	20.081967213114755,23.114754098360656,21.393442622950822,12.131147540983608,22.049180327868854,20.491803278688526,22.622950819672134,11.80327868852459,11.39344262295082,11.229508196721312,22.459016393442624,17.86885245901639,18.934426229508194,22.54098360
AH3Ma	chr9	NonIntact	Copia_LTR_retrotransposon	12.622950819672134,1.7213114754098378,13.852459016393446,1.1475409836065582,3.7704918032786923,4.590163934426233,11.639344262295085,2.4590163934426252,8.60655737704918,9.01639344262295,8.60655737704918,4.672131147540988,22.37704918032787,6.885245901639341
AH3Ma	chr9	NonIntact	Gypsy_LTR_retrotransposon	9.01639344262295,15.737704918032781,5.49180327868852,1.1475409836065582,16.557377049180324,14.91803278688525,15.49180327868852,5.983606557377045,0.9016393442622959,19.0983606557377,4.8360655737704965,5.327868852459011,5.081967213114759,3.852459016393446,1
AH3Ma	chr9	NonIntact	helitron	12.049180327868855,7.459016393442621,13.524590163934429,10.901639344262296,11.39344262295082,17.786885245901637,14.262295081967215,16.0655737704918,19.83606557377049,14.262295081967215,17.45901639344262,14.426229508196725,6.229508196721308,11.885245901639
AH3Ma	chr9	NonIntact	PIF_Harbinger_TIR_transposon	20.81967213114754,20.245901639344265,21.803278688524593,15.081967213114758,13.606557377049183,22.70491803278689,21.557377049180328,12.049180327868855,12.95081967213115,15.819672131147538,16.393442622950815,22.868852459016395,21.9672131147541,23.27868852459017,12.213114754098363,11.967213114754099,13.688524590163937,15.081967213114758,17.45901639344262,23.60655737704918,11.147540983606559,12.21311…
AH3Ma	chr9	NonIntact	Tc1_Mariner_TIR_transposon	14.754098360655743,14.262295081967215,21.639344262295083,11.311475409836067,18.0327868852459,14.098360655737707,19.18032786885246,14.098360655737707,21.721311475409834,13.36065573770492,12.459016393442624,17.29508196721311,23.934426229508198,21.721311475409834,12.786885245901642,15.49180327868852,11.721311475409838,15.655737704918028,11.557377049180328,11.721311475409838,11.557377049180328,17.295…
AH3Ma	chrX	NonIntact	Mutator_TIR_transposon	1.3114754098360666,15.245901639344268,5.573770491803274,14.754098360655743,5.000000000000004,9.180327868852459,19.672131147540984,14.50819672131148,8.196721311475407,17.786885245901637,13.606557377049183,15.819672131147538,8.688524590163933,20.81967213114
AH3Ma	chrX	NonIntact	CACTA_TIR_transposon	17.1311475409836,21.721311475409834,10.737704918032788,20.163934426229506,10.737704918032788,19.59016393442623,20.655737704918035,14.426229508196725,12.622950819672134,12.213114754098363,13.852459016393446,21.147540983606557,16.967213114754095,21.72131147
AH3Ma	chrX	NonIntact	LTR_retrotransposon	8.114754098360654,7.704918032786884,10.819672131147541,10.737704918032788,9.344262295081966,11.147540983606559,4.9180327868852505,16.72131147540983,14.590163934426233,14.180327868852462,17.950819672131143,14.590163934426233,11.967213114754099,5.9836065573
AH3Ma	chrX	NonIntact	helitron	13.196721311475413,11.639344262295085,17.1311475409836,12.049180327868855,20.163934426229506,9.180327868852459,19.508196721311474,17.377049180327866,6.147540983606554,14.344262295081972,14.590163934426233,18.852459016393443,14.50819672131148,10.3278688524
AH3Ma	chrX	NonIntact	Copia_LTR_retrotransposon	5.1639344262295035,3.2786885245901667,13.606557377049183,10.655737704918032,17.45901639344262,21.885245901639347,15.409836065573767,11.639344262295085,3.4426229508196755,2.4590163934426252,11.639344262295085,10.655737704918032,10.327868852459018,11.803278
AH3Ma	chrX	NonIntact	Gypsy_LTR_retrotransposon	7.704918032786884,13.36065573770492,13.114754098360658,15.409836065573767,17.950819672131143,13.606557377049183,21.557377049180328,5.327868852459011,16.47540983606557,18.934426229508194,15.901639344262291,15.901639344262291,22.37704918032787,22.8688524590
AH3Ma	chrX	NonIntact	hAT_TIR_transposon	21.065573770491806,10.901639344262296,16.885245901639344,15.655737704918028,15.409836065573767,9.754098360655737,15.655737704918028,10.491803278688524,10.0,18.770491803278688,18.442622950819672,6.803278688524587,13.36065573770492,7.9508196721311455,12.540
AH3Ma	chrX	NonIntact	PIF_Harbinger_TIR_transposon	9.426229508196721,18.524590163934423,12.459016393442624,17.950819672131143,16.803278688524586,22.70491803278689,22.213114754098363,16.885245901639344,9.344262295081966,21.065573770491806,4.426229508196726,15.163934426229511,23.524590163934427,12.213114754
AH3Ma	chrX	NonIntact	Tc1_Mariner_TIR_transposon	18.688524590163933,16.885245901639344,20.901639344262293,14.426229508196725,19.344262295081965,16.967213114754095,18.770491803278688,15.49180327868852,14.016393442622954,10.737704918032788,19.42622950819672,21.229508196721312,10.819672131147541,18.770491803278688,15.901639344262291,17.62295081967213,18.606557377049178,12.868852459016395,17.29508196721311,14.50819672131148,11.147540983606559,18.11…
AH3Mb	chr1	NonIntact	Mutator_TIR_transposon	2.1311475409836085,1.8032786885245917,2.4590163934426252,1.8032786885245917,1.5573770491803294,2.2950819672131164,2.95081967213115,1.475409836065575,2.049180327868854,1.8032786885245917,1.5573770491803294,1.8032786885245917,2.95081967213115,1.393442622950
AH3Mb	chr1	NonIntact	CACTA_TIR_transposon	14.836065573770496,16.72131147540983,20.081967213114755,16.72131147540983,13.606557377049183,20.655737704918035,9.180327868852459,15.901639344262291,15.901639344262291,12.049180327868855,16.147540983606554,9.836065573770492,12.37704918032787,14.5901639344
AH3Mb	chr1	NonIntact	Copia_LTR_retrotransposon	12.049180327868855,4.344262295081971,3.852459016393446,3.4426229508196755,3.852459016393446,5.081967213114759,2.377049180327871,6.147540983606554,7.459016393442621,11.475409836065575,15.409836065573767,15.409836065573767,13.852459016393446,21.885245901639
AH3Mb	chr1	NonIntact	hAT_TIR_transposon	18.196721311475407,16.72131147540983,16.557377049180324,16.557377049180324,6.885245901639341,15.245901639344268,16.72131147540983,13.36065573770492,13.770491803278691,10.573770491803279,11.80327868852459,7.868852459016391,19.672131147540984,6.311475409836
AH3Mb	chr1	NonIntact	LTR_retrotransposon	3.2786885245901667,19.42622950819672,2.95081967213115,18.278688524590162,14.754098360655743,11.229508196721312,12.295081967213116,10.40983606557377,15.327868852459021,13.114754098360658,14.91803278688525,21.147540983606557,8.688524590163933,15.98360655737
AH3Mb	chr1	NonIntact	Gypsy_LTR_retrotransposon	16.557377049180324,15.081967213114758,17.950819672131143,6.065573770491799,6.311475409836063,12.868852459016395,2.4590163934426252,3.9344262295082,7.622950819672129,15.983606557377046,4.590163934426233,6.885245901639341,21.475409836065577,10.4918032786885
AH3Mb	chr1	NonIntact	helitron	17.377049180327866,18.606557377049178,12.37704918032787,17.45901639344262,20.245901639344265,17.704918032786882,17.86885245901639,19.01639344262295,13.114754098360658,14.50819672131148,19.672131147540984,18.114754098360653,16.72131147540983,19.01639344262
AH3Mb	chr1	NonIntact	PIF_Harbinger_TIR_transposon	14.590163934426233,13.196721311475413,18.852459016393443,15.819672131147538,15.163934426229511,20.245901639344265,22.622950819672134,13.032786885245905,19.0983606557377,17.21311475409836,17.1311475409836,15.327868852459021,17.04918032786885,7.377049180327866,17.1311475409836,19.18032786885246,5.49180327868852,11.721311475409838,10.98360655737705,14.016393442622954,18.524590163934423,16.5573770491…
AH3Mb	chr1	NonIntact	Tc1_Mariner_TIR_transposon	11.311475409836067,19.754098360655735,19.42622950819672,18.442622950819672,22.295081967213118,17.45901639344262,13.114754098360658,8.114754098360654,15.49180327868852,10.40983606557377,19.262295081967213,16.0655737704918,9.180327868852459,23.36065573770492,18.114754098360653,21.639344262295083,18.0327868852459,18.360655737704917,18.852459016393443,11.147540983606559,13.442622950819676,13.03278688…
AH3Mb	chr2	NonIntact	Gypsy_LTR_retrotransposon	10.98360655737705,17.377049180327866,24.590163934426233,16.72131147540983,22.459016393442624,18.524590163934423,17.45901639344262,16.72131147540983,13.934426229508201,15.000000000000004,24.180327868852462,4.9180327868852505,3.688524590163938,16.5573770491
AH3Mb	chr2	NonIntact	Mutator_TIR_transposon	20.0,12.54098360655738,2.786885245901642,21.885245901639347,22.37704918032787,19.508196721311474,20.163934426229506,8.770491803278686,9.754098360655737,22.95081967213115,8.360655737704915,6.147540983606554,12.213114754098363,9.426229508196721,21.311475409
AH3Mb	chr2	NonIntact	PIF_Harbinger_TIR_transposon	14.098360655737707,13.688524590163937,17.950819672131143,22.622950819672134,20.655737704918035,15.081967213114758,18.442622950819672,19.344262295081965,23.934426229508198,22.131147540983605,9.01639344262295,15.327868852459021,19.344262295081965,19.344262295081965,12.295081967213116,19.344262295081965,16.22950819672131,12.622950819672134,11.885245901639346,15.000000000000004,19.42622950819672,17.9…
AH3Mb	chr2	NonIntact	hAT_TIR_transposon	18.278688524590162,16.0655737704918,11.80327868852459,15.983606557377046,13.688524590163937,16.967213114754095,17.21311475409836,11.639344262295085,12.786885245901642,18.524590163934423,15.983606557377046,9.180327868852459,20.491803278688526,16.1475409836
AH3Mb	chr2	NonIntact	LTR_retrotransposon	11.311475409836067,11.311475409836067,21.229508196721312,2.786885245901642,7.131147540983603,15.000000000000004,14.098360655737707,7.295081967213112,5.737704918032783,13.278688524590166,13.934426229508201,13.934426229508201,13.196721311475413,23.196721311
AH3Mb	chr2	NonIntact	Copia_LTR_retrotransposon	21.065573770491806,18.196721311475407,9.754098360655737,2.7049180327868876,14.426229508196725,11.639344262295085,6.6393442622950785,12.95081967213115,18.0327868852459,12.213114754098363,3.0327868852459043,7.295081967213112,3.2786885245901667,8.19672131147
AH3Mb	chr2	NonIntact	helitron	21.9672131147541,14.754098360655743,21.557377049180328,17.1311475409836,15.983606557377046,16.393442622950815,18.0327868852459,18.114754098360653,17.540983606557372,4.262295081967217,13.606557377049183,10.901639344262296,18.196721311475407,15.983606557377
AH3Mb	chr2	NonIntact	CACTA_TIR_transposon	14.754098360655743,16.885245901639344,19.508196721311474,7.622950819672129,18.524590163934423,13.196721311475413,12.049180327868855,21.229508196721312,2.8688524590163964,13.278688524590166,16.0655737704918,18.688524590163933,15.409836065573767,12.70491803
AH3Mb	chr2	NonIntact	Tc1_Mariner_TIR_transposon	18.770491803278688,14.590163934426233,20.163934426229506,14.262295081967215,13.606557377049183,9.508196721311474,19.918032786885245,15.901639344262291,12.704918032786887,15.737704918032781,11.967213114754099,12.868852459016395,21.475409836065577,22.54098360655738,19.01639344262295,12.95081967213115,9.836065573770492,11.721311475409838,21.147540983606557,23.032786885245905,19.01639344262295,10.573…
AH3Mb	chr3	NonIntact	helitron	7.04918032786885,17.1311475409836,13.524590163934429,18.196721311475407,15.081967213114758,19.672131147540984,18.360655737704917,14.754098360655743,15.655737704918028,12.786885245901642,18.114754098360653,19.672131147540984,10.98360655737705,15.4918032786
AH3Mb	chr3	NonIntact	Copia_LTR_retrotransposon	2.95081967213115,11.065573770491802,15.327868852459021,15.000000000000004,11.639344262295085,13.852459016393446,19.918032786885245,12.295081967213116,23.032786885245905,3.0327868852459043,14.836065573770496,3.360655737704921,16.885245901639344,16.63934426
AH3Mb	chr3	NonIntact	LTR_retrotransposon	4.754098360655742,11.39344262295082,21.639344262295083,11.147540983606559,21.803278688524593,9.836065573770492,21.803278688524593,14.672131147540988,18.852459016393443,14.344262295081972,12.54098360655738,2.5409836065573796,7.131147540983603,10.0,12.78688
AH3Mb	chr3	NonIntact	Mutator_TIR_transposon	13.278688524590166,22.049180327868854,19.0983606557377,10.737704918032788,12.704918032786887,15.49180327868852,13.934426229508201,0.98360655737705,9.754098360655737,10.245901639344263,14.344262295081972,13.196721311475413,13.442622950819676,13.93442622950
AH3Mb	chr3	NonIntact	Gypsy_LTR_retrotransposon	12.95081967213115,15.819672131147538,20.655737704918035,16.72131147540983,17.86885245901639,10.737704918032788,5.49180327868852,4.50819672131148,4.50819672131148,16.31147540983606,6.721311475409832,3.4426229508196755,3.1967213114754123,5.573770491803274,1
AH3Mb	chr3	NonIntact	CACTA_TIR_transposon	7.786885245901637,22.78688524590164,19.262295081967213,8.524590163934425,12.95081967213115,12.95081967213115,16.72131147540983,16.72131147540983,19.59016393442623,22.78688524590164,19.01639344262295,9.59016393442623,16.0655737704918,20.40983606557377,10.3
AH3Mb	chr3	NonIntact	hAT_TIR_transposon	11.80327868852459,12.868852459016395,14.262295081967215,11.557377049180328,15.983606557377046,22.37704918032787,5.819672131147537,9.262295081967212,6.885245901639341,13.278688524590166,7.295081967213112,4.9180327868852505,14.672131147540988,23.27868852459
AH3Mb	chr3	NonIntact	PIF_Harbinger_TIR_transposon	14.426229508196725,24.262295081967217,10.573770491803279,11.885245901639346,15.327868852459021,17.29508196721311,24.50819672131148,19.262295081967213,17.1311475409836,20.163934426229506,18.278688524590162,17.704918032786882,12.95081967213115,20.573770491803277,16.885245901639344,16.967213114754095,5.409836065573766,17.21311475409836,15.819672131147538,16.72131147540983,18.688524590163933,13.52459…
AH3Mb	chr3	NonIntact	Tc1_Mariner_TIR_transposon	14.590163934426233,12.704918032786887,15.245901639344268,19.42622950819672,15.901639344262291,7.459016393442621,17.29508196721311,11.967213114754099,21.147540983606557,14.590163934426233,22.213114754098363,10.573770491803279,17.45901639344262,17.29508196721311,12.95081967213115,11.229508196721312,13.278688524590166,23.27868852459017,15.573770491803273,19.83606557377049,11.80327868852459,17.459016…
AH3Mb	chr4	NonIntact	Mutator_TIR_transposon	3.6065573770491834,5.1639344262295035,1.8032786885245917,4.098360655737708,5.245901639344258,3.4426229508196755,2.5409836065573796,2.786885245901642,3.6065573770491834,4.754098360655742,1.8032786885245917,4.098360655737708,5.000000000000004,2.049180327868
AH3Mb	chr4	NonIntact	Copia_LTR_retrotransposon	11.311475409836067,3.6065573770491834,3.2786885245901667,12.868852459016395,3.360655737704921,6.885245901639341,12.704918032786887,15.49180327868852,1.393442622950821,12.786885245901642,2.4590163934426252,3.360655737704921,8.770491803278686,22.04918032786
AH3Mb	chr4	NonIntact	LTR_retrotransposon	9.344262295081966,14.426229508196725,14.50819672131148,7.459016393442621,8.60655737704918,11.80327868852459,17.1311475409836,12.786885245901642,17.29508196721311,6.721311475409832,14.180327868852462,4.262295081967217,12.786885245901642,7.9508196721311455,
AH3Mb	chr4	NonIntact	hAT_TIR_transposon	18.442622950819672,16.22950819672131,16.63934426229508,19.508196721311474,19.01639344262295,17.786885245901637,19.01639344262295,17.1311475409836,16.393442622950815,18.196721311475407,18.360655737704917,19.83606557377049,18.934426229508194,6.1475409836065
AH3Mb	chr4	NonIntact	CACTA_TIR_transposon	17.1311475409836,6.721311475409832,21.9672131147541,16.557377049180324,16.967213114754095,11.39344262295082,13.36065573770492,18.770491803278688,18.934426229508194,15.081967213114758,20.901639344262293,10.163934426229508,19.262295081967213,12.377049180327
AH3Mb	chr4	NonIntact	Gypsy_LTR_retrotransposon	7.295081967213112,8.360655737704915,4.50819672131148,10.655737704918032,3.6065573770491834,3.6065573770491834,1.3114754098360666,0.9016393442622959,2.213114754098363,22.049180327868854,10.491803278688524,19.59016393442623,17.540983606557372,14.34426229508
AH3Mb	chr4	NonIntact	helitron	24.016393442622952,18.606557377049178,15.081967213114758,13.934426229508201,19.01639344262295,14.590163934426233,17.29508196721311,14.016393442622954,14.91803278688525,15.49180327868852,20.081967213114755,15.737704918032781,4.426229508196726,16.1475409836
AH3Mb	chr4	NonIntact	PIF_Harbinger_TIR_transposon	13.032786885245905,8.852459016393441,20.983606557377048,3.7704918032786923,2.2950819672131164,14.098360655737707,21.885245901639347,14.754098360655743,16.967213114754095,17.786885245901637,20.983606557377048,6.885245901639341,23.68852459016394,5.655737704918029,7.704918032786884,13.852459016393446,20.81967213114754,18.0327868852459,21.803278688524593,23.114754098360656,23.114754098360656,19.01639…
AH3Mb	chr4	NonIntact	Tc1_Mariner_TIR_transposon	20.983606557377048,18.442622950819672,19.508196721311474,12.459016393442624,17.1311475409836,19.508196721311474,12.131147540983608,20.491803278688526,15.901639344262291,10.327868852459018,22.95081967213115,10.98360655737705,18.524590163934423,15.901639344262291,20.491803278688526,15.983606557377046,17.1311475409836,11.557377049180328,11.721311475409838,20.491803278688526,15.245901639344268,14.344…
AH3Mb	chr5	NonIntact	Mutator_TIR_transposon	1.8852459016393461,2.049180327868854,2.2950819672131164,2.4590163934426252,3.360655737704921,2.4590163934426252,2.2950819672131164,2.4590163934426252,3.360655737704921,2.95081967213115,1.8032786885245917,2.4590163934426252,2.7049180327868876,1.80327868852
AH3Mb	chr5	NonIntact	CACTA_TIR_transposon	15.081967213114758,16.72131147540983,16.72131147540983,14.098360655737707,11.80327868852459,11.80327868852459,12.131147540983608,6.6393442622950785,19.18032786885246,17.04918032786885,17.540983606557372,19.83606557377049,12.459016393442624,15.901639344262
AH3Mb	chr5	NonIntact	hAT_TIR_transposon	17.29508196721311,17.29508196721311,10.491803278688524,23.36065573770492,20.655737704918035,19.344262295081965,6.885245901639341,14.262295081967215,20.081967213114755,14.754098360655743,3.0327868852459043,10.901639344262296,8.278688524590162,16.5573770491
AH3Mb	chr5	NonIntact	Copia_LTR_retrotransposon	12.131147540983608,6.721311475409832,5.573770491803274,21.9672131147541,9.180327868852459,8.852459016393441,7.04918032786885,10.655737704918032,20.0,15.000000000000004,9.262295081967212,4.180327868852463,4.180327868852463,5.081967213114759,4.1803278688524
AH3Mb	chr5	NonIntact	helitron	19.59016393442623,13.278688524590166,10.245901639344263,13.688524590163937,14.590163934426233,14.590163934426233,16.147540983606554,20.983606557377048,10.40983606557377,12.622950819672134,19.18032786885246,12.459016393442624,23.442622950819676,19.26229508
AH3Mb	chr5	NonIntact	Tc1_Mariner_TIR_transposon	17.786885245901637,12.131147540983608,12.131147540983608,12.459016393442624,18.114754098360653,15.737704918032781,22.622950819672134,8.442622950819672,12.37704918032787,16.72131147540983,15.983606557377046,14.180327868852462,18.442622950819672,13.442622950819676,11.639344262295085,14.754098360655743,11.721311475409838,20.245901639344265,15.901639344262291,18.606557377049178,16.22950819672131,17.3…
AH3Mb	chr5	NonIntact	LTR_retrotransposon	21.311475409836063,11.885245901639346,13.196721311475413,14.016393442622954,12.54098360655738,13.032786885245905,14.836065573770496,3.524590163934429,14.426229508196725,11.065573770491802,4.262295081967217,17.62295081967213,14.426229508196725,6.0655737704
AH3Mb	chr5	NonIntact	PIF_Harbinger_TIR_transposon	20.81967213114754,13.36065573770492,12.459016393442624,18.524590163934423,24.50819672131148,22.78688524590164,12.868852459016395,18.442622950819672,15.327868852459021,21.557377049180328,19.18032786885246,21.475409836065577,16.31147540983606,23.27868852459017,9.672131147540982,10.573770491803279,21.147540983606557,16.393442622950815,17.540983606557372,15.327868852459021,2.4590163934426252,2.786885…
AH3Mb	chr5	NonIntact	Gypsy_LTR_retrotransposon	12.459016393442624,16.0655737704918,21.311475409836063,14.754098360655743,5.737704918032783,10.98360655737705,21.393442622950822,7.377049180327866,17.62295081967213,11.721311475409838,7.295081967213112,8.196721311475407,4.50819672131148,5.49180327868852,1
AH3Mb	chr6	NonIntact	Gypsy_LTR_retrotransposon	18.196721311475407,18.196721311475407,17.950819672131143,6.065573770491799,18.770491803278688,4.50819672131148,18.688524590163933,16.47540983606557,5.1639344262295035,16.147540983606554,18.688524590163933,20.655737704918035,3.7704918032786923,3.6065573770
AH3Mb	chr6	NonIntact	Mutator_TIR_transposon	20.901639344262293,9.508196721311474,20.491803278688526,16.31147540983606,9.508196721311474,21.147540983606557,10.081967213114753,20.901639344262293,10.081967213114753,20.901639344262293,16.47540983606557,20.901639344262293,8.524590163934425,9.50819672131
AH3Mb	chr6	NonIntact	helitron	8.196721311475407,6.4754098360655705,11.639344262295085,8.196721311475407,5.409836065573766,10.901639344262296,8.196721311475407,5.983606557377045,11.557377049180328,8.196721311475407,6.4754098360655705,11.557377049180328,15.737704918032781,16.80327868852
AH3Mb	chr6	NonIntact	Copia_LTR_retrotransposon	14.91803278688525,0.0,0.6557377049180333,0.9016393442622959,7.540983606557375,5.327868852459011,16.557377049180324,8.934426229508196,8.360655737704915,6.147540983606554,8.852459016393441,13.934426229508201,7.540983606557375,15.327868852459021,9.1803278688
AH3Mb	chr6	NonIntact	LTR_retrotransposon	5.983606557377045,6.311475409836063,1.475409836065575,8.852459016393441,13.852459016393446,10.737704918032788,8.524590163934425,16.72131147540983,17.29508196721311,8.852459016393441,10.573770491803279,8.524590163934425,16.885245901639344,17.62295081967213
AH3Mb	chr6	NonIntact	hAT_TIR_transposon	4.098360655737708,4.098360655737708,4.098360655737708,16.72131147540983,4.754098360655742,4.098360655737708,23.19672131147541,20.655737704918035,8.442622950819672,17.377049180327866,15.49180327868852,12.295081967213116,5.819672131147537,14.91803278688525,
AH3Mb	chr6	NonIntact	CACTA_TIR_transposon	17.540983606557372,17.786885245901637,19.59016393442623,14.426229508196725,12.131147540983608,14.016393442622954,23.36065573770492,14.016393442622954,7.459016393442621,12.622950819672134,15.327868852459021,18.360655737704917,12.213114754098363,9.262295081
AH3Mb	chr6	NonIntact	PIF_Harbinger_TIR_transposon	12.213114754098363,10.081967213114753,15.327868852459021,14.836065573770496,22.78688524590164,21.639344262295083,14.50819672131148,16.393442622950815,20.983606557377048,19.18032786885246,17.786885245901637,13.524590163934429,18.114754098360653,13.688524590163937,17.950819672131143,24.426229508196727,24.180327868852462,20.81967213114754,22.459016393442624,24.016393442622952,12.622950819672134,24.5…
AH3Mb	chr6	NonIntact	Tc1_Mariner_TIR_transposon	24.016393442622952,13.032786885245905,12.95081967213115,13.770491803278691,12.786885245901642,16.63934426229508,17.86885245901639,9.262295081967212,13.688524590163937,14.016393442622954,16.393442622950815,10.98360655737705,14.016393442622954,20.901639344262293,22.622950819672134,19.18032786885246,9.59016393442623,17.540983606557372,16.63934426229508,18.360655737704917,18.852459016393443,10.491803…
AH3Mb	chr7	NonIntact	Mutator_TIR_transposon	2.95081967213115,2.2950819672131164,3.1967213114754123,3.1967213114754123,2.2950819672131164,2.95081967213115,2.95081967213115,3.360655737704921,2.049180327868854,2.7049180327868876,2.2950819672131164,2.2950819672131164,3.360655737704921,2.459016393442625
AH3Mb	chr7	NonIntact	Gypsy_LTR_retrotransposon	16.31147540983606,14.262295081967215,3.9344262295082,6.721311475409832,5.983606557377045,9.180327868852459,18.770491803278688,4.9180327868852505,17.950819672131143,3.6065573770491834,3.0327868852459043,18.688524590163933,10.819672131147541,15.000000000000
AH3Mb	chr7	NonIntact	Copia_LTR_retrotransposon	15.819672131147538,16.147540983606554,15.901639344262291,15.327868852459021,8.442622950819672,20.327868852459016,23.852459016393446,5.901639344262291,15.327868852459021,17.950819672131143,16.557377049180324,16.31147540983606,16.63934426229508,16.229508196
AH3Mb	chr7	NonIntact	helitron	15.573770491803273,14.836065573770496,17.377049180327866,17.1311475409836,24.50819672131148,17.377049180327866,16.31147540983606,18.278688524590162,16.31147540983606,24.34426229508197,18.524590163934423,22.78688524590164,18.934426229508194,15.409836065573
AH3Mb	chr7	NonIntact	LTR_retrotransposon	13.278688524590166,12.868852459016395,13.278688524590166,13.36065573770492,13.196721311475413,12.868852459016395,6.393442622950817,5.327868852459011,6.5573770491803245,20.655737704918035,10.327868852459018,13.196721311475413,11.065573770491802,24.34426229
AH3Mb	chr7	NonIntact	CACTA_TIR_transposon	24.180327868852462,21.557377049180328,24.426229508196727,19.754098360655735,24.09836065573771,21.557377049180328,24.426229508196727,21.557377049180328,21.721311475409834,17.62295081967213,16.47540983606557,11.311475409836067,9.180327868852459,13.114754098
AH3Mb	chr7	NonIntact	PIF_Harbinger_TIR_transposon	23.19672131147541,18.442622950819672,16.803278688524586,15.901639344262291,17.377049180327866,23.032786885245905,22.622950819672134,20.81967213114754,10.573770491803279,16.0655737704918,16.72131147540983,18.442622950819672,18.606557377049178,19.83606557377049,14.836065573770496,12.95081967213115,14.262295081967215,13.688524590163937,10.40983606557377,5.737704918032783,10.901639344262296,20.327868…
AH3Mb	chr7	NonIntact	hAT_TIR_transposon	16.47540983606557,6.4754098360655705,5.737704918032783,6.4754098360655705,7.868852459016391,9.262295081967212,6.885245901639341,24.09836065573771,9.836065573770492,14.50819672131148,3.1967213114754123,20.163934426229506,13.032786885245905,20.9016393442622
AH3Mb	chr7	NonIntact	Tc1_Mariner_TIR_transposon	15.327868852459021,19.01639344262295,15.655737704918028,18.606557377049178,11.885245901639346,9.754098360655737,22.622950819672134,11.885245901639346,15.983606557377046,22.54098360655738,14.262295081967215,11.557377049180328,12.131147540983608,19.01639344262295,18.688524590163933,19.672131147540984,18.0327868852459,9.59016393442623,17.1311475409836,13.852459016393446,15.573770491803273,21.4754098…
AH3Mb	chr8	NonIntact	Gypsy_LTR_retrotransposon	5.901639344262291,3.9344262295082,3.1967213114754123,10.901639344262296,13.524590163934429,11.557377049180328,14.836065573770496,8.852459016393441,16.557377049180324,6.5573770491803245,16.557377049180324,13.278688524590166,13.770491803278691,12.7868852459
AH3Mb	chr8	NonIntact	LTR_retrotransposon	16.967213114754095,8.442622950819672,11.39344262295082,15.983606557377046,6.721311475409832,14.262295081967215,9.918032786885245,14.016393442622954,5.000000000000004,8.934426229508196,10.655737704918032,15.49180327868852,17.86885245901639,5.57377049180327
AH3Mb	chr8	NonIntact	Copia_LTR_retrotransposon	6.311475409836063,7.704918032786884,9.262295081967212,9.508196721311474,13.278688524590166,10.491803278688524,5.327868852459011,13.442622950819676,11.39344262295082,3.2786885245901667,5.245901639344258,5.409836065573766,13.688524590163937,12.4590163934426
AH3Mb	chr8	NonIntact	helitron	20.573770491803277,6.5573770491803245,13.688524590163937,19.59016393442623,6.5573770491803245,5.327868852459011,21.393442622950822,4.8360655737704965,21.393442622950822,3.9344262295082,14.262295081967215,3.2786885245901667,4.8360655737704965,21.8032786885
AH3Mb	chr8	NonIntact	hAT_TIR_transposon	18.278688524590162,15.081967213114758,15.409836065573767,18.360655737704917,13.934426229508201,13.278688524590166,18.278688524590162,15.081967213114758,15.409836065573767,17.21311475409836,15.327868852459021,16.22950819672131,17.21311475409836,15.08196721
AH3Mb	chr8	NonIntact	CACTA_TIR_transposon	16.72131147540983,14.180327868852462,10.0,14.836065573770496,17.1311475409836,15.245901639344268,15.983606557377046,16.557377049180324,12.786885245901642,0.491803278688525,0.40983606557377084,14.50819672131148,14.262295081967215,15.245901639344268,16.6393
AH3Mb	chr8	NonIntact	PIF_Harbinger_TIR_transposon	16.72131147540983,6.6393442622950785,12.37704918032787,18.852459016393443,16.72131147540983,8.114754098360654,14.180327868852462,18.360655737704917,14.50819672131148,9.180327868852459,18.114754098360653,10.40983606557377,14.344262295081972,19.344262295081965,8.852459016393441,14.672131147540988,7.04918032786885,20.163934426229506,23.36065573770492,8.852459016393441,14.672131147540988,7.0491803278…
AH3Mb	chr8	NonIntact	Mutator_TIR_transposon	24.180327868852462,5.409836065573766,11.065573770491802,13.114754098360658,14.344262295081972,13.114754098360658,14.016393442622954,7.868852459016391,13.196721311475413,23.27868852459017,5.901639344262291,20.327868852459016,10.245901639344263,17.786885245
AH3Mb	chr8	NonIntact	Tc1_Mariner_TIR_transposon	14.180327868852462,20.40983606557377,20.245901639344265,19.01639344262295,19.754098360655735,9.01639344262295,12.459016393442624,22.131147540983605,18.278688524590162,19.83606557377049,24.426229508196727,18.852459016393443,10.737704918032788,17.377049180327866,11.721311475409838,17.950819672131143,19.508196721311474,18.934426229508194,16.393442622950815,13.442622950819676,13.196721311475413,11.72…
AH3Mb	chr9	NonIntact	hAT_TIR_transposon	15.573770491803273,16.803278688524586,8.934426229508196,20.0,7.04918032786885,8.934426229508196,18.442622950819672,10.245901639344263,4.9180327868852505,17.04918032786885,18.0327868852459,16.803278688524586,13.36065573770492,16.31147540983606,16.311475409
AH3Mb	chr9	NonIntact	Gypsy_LTR_retrotransposon	16.31147540983606,16.885245901639344,15.163934426229511,7.786885245901637,6.4754098360655705,10.819672131147541,19.18032786885246,17.29508196721311,4.344262295081971,3.9344262295082,8.524590163934425,5.819672131147537,4.8360655737704965,16.63934426229508,
AH3Mb	chr9	NonIntact	Copia_LTR_retrotransposon	11.967213114754099,18.0327868852459,5.819672131147537,18.0327868852459,3.6065573770491834,2.049180327868854,2.213114754098363,2.049180327868854,21.639344262295083,16.72131147540983,17.786885245901637,8.934426229508196,15.819672131147538,4.50819672131148,3
AH3Mb	chr9	NonIntact	Mutator_TIR_transposon	18.442622950819672,12.295081967213116,11.475409836065575,19.262295081967213,3.1147540983606588,24.262295081967217,11.39344262295082,18.278688524590162,12.786885245901642,21.885245901639347,8.852459016393441,12.704918032786887,15.983606557377046,24.2622950
AH3Mb	chr9	NonIntact	helitron	18.688524590163933,12.213114754098363,18.688524590163933,14.344262295081972,17.04918032786885,14.91803278688525,8.524590163934425,9.918032786885245,16.31147540983606,10.98360655737705,7.540983606557375,22.213114754098363,22.049180327868854,13.770491803278
AH3Mb	chr9	NonIntact	LTR_retrotransposon	4.262295081967217,11.475409836065575,21.9672131147541,2.2950819672131164,15.245901639344268,18.524590163934423,19.672131147540984,14.91803278688525,23.114754098360656,14.262295081967215,20.573770491803277,3.360655737704921,13.770491803278691,17.2950819672
AH3Mb	chr9	NonIntact	CACTA_TIR_transposon	13.606557377049183,20.573770491803277,14.098360655737707,15.163934426229511,17.62295081967213,24.590163934426233,10.573770491803279,20.573770491803277,17.786885245901637,11.721311475409838,14.672131147540988,13.114754098360658,18.934426229508194,10.245901
AH3Mb	chr9	NonIntact	Tc1_Mariner_TIR_transposon	23.934426229508198,11.967213114754099,15.245901639344268,13.032786885245905,18.606557377049178,20.327868852459016,13.770491803278691,18.934426229508194,13.934426229508201,19.508196721311474,18.688524590163933,22.622950819672134,13.688524590163937,21.721311475409834,18.278688524590162,18.770491803278688,16.31147540983606,19.01639344262295,14.098360655737707,18.524590163934423,11.721311475409838,11…
AH3Mb	chr9	NonIntact	PIF_Harbinger_TIR_transposon	22.459016393442624,14.098360655737707,20.737704918032787,20.901639344262293,18.360655737704917,24.09836065573771,19.01639344262295,14.672131147540988,17.45901639344262,17.377049180327866,9.59016393442623,10.081967213114753,11.80327868852459,13.688524590163937,5.983606557377045,20.983606557377048,20.573770491803277,14.344262295081972,20.901639344262293,20.081967213114755,20.327868852459016,21.5573…
AH3Mb	chrY	NonIntact	Mutator_TIR_transposon	3.2786885245901667,5.000000000000004,5.901639344262291,4.754098360655742,4.098360655737708,3.1967213114754123,3.1967213114754123,4.262295081967217,5.901639344262291,4.262295081967217,4.262295081967217,4.262295081967217,8.524590163934425,9.180327868852459,
AH3Mb	chrY	NonIntact	hAT_TIR_transposon	16.72131147540983,15.737704918032781,18.0327868852459,7.868852459016391,15.49180327868852,16.72131147540983,17.29508196721311,17.29508196721311,18.934426229508194,24.50819672131148,2.8688524590163964,5.081967213114759,9.01639344262295,16.393442622950815,1
AH3Mb	chrY	NonIntact	LTR_retrotransposon	17.540983606557372,13.442622950819676,12.049180327868855,13.442622950819676,11.639344262295085,4.9180327868852505,12.786885245901642,15.327868852459021,8.360655737704915,14.91803278688525,5.655737704918029,12.131147540983608,8.60655737704918,8.03278688524
AH3Mb	chrY	NonIntact	Copia_LTR_retrotransposon	8.688524590163933,11.39344262295082,20.655737704918035,4.344262295081971,4.8360655737704965,10.655737704918032,13.688524590163937,6.065573770491799,12.37704918032787,3.2786885245901667,3.852459016393446,22.295081967213118,12.786885245901642,21.88524590163
AH3Mb	chrY	NonIntact	PIF_Harbinger_TIR_transposon	6.5573770491803245,21.393442622950822,8.852459016393441,13.114754098360658,19.508196721311474,20.655737704918035,19.262295081967213,18.934426229508194,6.147540983606554,14.262295081967215,15.737704918032781,20.163934426229506,16.393442622950815,19.18032786885246,18.196721311475407,23.934426229508198,18.114754098360653,16.393442622950815,13.278688524590166,8.0327868852459,18.360655737704917,14.180…
AH3Mb	chrY	NonIntact	helitron	11.557377049180328,18.196721311475407,18.0327868852459,11.80327868852459,14.590163934426233,21.557377049180328,16.47540983606557,3.9344262295082,0.5737704918032791,14.426229508196725,15.983606557377046,17.950819672131143,14.426229508196725,7.4590163934426
AH3Mb	chrY	NonIntact	Tc1_Mariner_TIR_transposon	12.213114754098363,22.868852459016395,15.49180327868852,20.901639344262293,17.540983606557372,22.459016393442624,9.59016393442623,19.18032786885246,18.852459016393443,17.86885245901639,13.606557377049183,9.344262295081966,19.18032786885246,11.39344262295082,21.557377049180328,18.442622950819672,22.95081967213115,8.0327868852459,16.803278688524586,21.065573770491806,20.081967213114755,18.114754098…
AH3Mb	chrY	NonIntact	CACTA_TIR_transposon	15.081967213114758,16.63934426229508,16.72131147540983,16.72131147540983,22.70491803278689,18.196721311475407,14.91803278688525,18.524590163934423,18.524590163934423,15.163934426229511,14.344262295081972,18.688524590163933,14.50819672131148,12.70491803278
AH3Mb	chrY	NonIntact	Gypsy_LTR_retrotransposon	17.29508196721311,19.754098360655735,10.573770491803279,18.770491803278688,16.557377049180324,19.508196721311474,9.426229508196721,5.49180327868852,21.885245901639347,20.655737704918035,17.04918032786885,21.147540983606557,7.04918032786885,19.672131147540
BCMa	chr1	NonIntact	LTR_retrotransposon	18.688524590163933,15.327868852459021,8.852459016393441,8.852459016393441,6.229508196721308,12.131147540983608,7.295081967213112,9.508196721311474,18.606557377049178,11.39344262295082,19.344262295081965,18.114754098360653,10.737704918032788,19.26229508196
BCMa	chr1	NonIntact	Copia_LTR_retrotransposon	14.098360655737707,5.081967213114759,14.098360655737707,5.081967213114759,10.40983606557377,17.04918032786885,11.639344262295085,2.049180327868854,5.49180327868852,11.475409836065575,18.934426229508194,15.000000000000004,0.98360655737705,3.360655737704921
BCMa	chr1	NonIntact	helitron	15.000000000000004,8.278688524590162,5.737704918032783,15.000000000000004,17.86885245901639,21.393442622950822,20.655737704918035,13.196721311475413,9.59016393442623,10.98360655737705,11.557377049180328,12.131147540983608,12.95081967213115,15.327868852459
BCMa	chr1	NonIntact	CACTA_TIR_transposon	13.36065573770492,13.36065573770492,6.6393442622950785,5.573770491803274,8.0327868852459,20.0,9.508196721311474,15.901639344262291,7.377049180327866,19.83606557377049,19.508196721311474,19.262295081967213,21.885245901639347,1.5573770491803294,19.508196721
BCMa	chr1	NonIntact	hAT_TIR_transposon	23.68852459016394,24.50819672131148,14.836065573770496,4.9180327868852505,2.2950819672131164,14.426229508196725,21.147540983606557,18.278688524590162,6.393442622950817,7.540983606557375,11.721311475409838,21.393442622950822,16.885245901639344,14.098360655
BCMa	chr1	NonIntact	Gypsy_LTR_retrotransposon	7.377049180327866,11.065573770491802,8.688524590163933,2.1311475409836085,3.9344262295082,0.491803278688525,0.40983606557377084,20.737704918032787,8.852459016393441,7.295081967213112,5.49180327868852,15.081967213114758,8.196721311475407,2.377049180327871,
BCMa	chr1	NonIntact	Mutator_TIR_transposon	15.655737704918028,18.934426229508194,15.163934426229511,14.754098360655743,20.737704918032787,9.59016393442623,14.590163934426233,8.524590163934425,23.68852459016394,22.868852459016395,9.918032786885245,12.295081967213116,13.852459016393446,20.9836065573
BCMa	chr1	NonIntact	PIF_Harbinger_TIR_transposon	10.081967213114753,14.672131147540988,21.639344262295083,16.885245901639344,15.49180327868852,15.655737704918028,8.360655737704915,9.918032786885245,2.4590163934426252,8.852459016393441,7.459016393442621,14.098360655737707,21.393442622950822,16.147540983606554,21.147540983606557,19.59016393442623,21.557377049180328,24.180327868852462,21.475409836065577,17.1311475409836,10.901639344262296,17.04918…
BCMa	chr1	NonIntact	Tc1_Mariner_TIR_transposon	14.262295081967215,15.573770491803273,17.86885245901639,21.803278688524593,20.737704918032787,21.229508196721312,15.901639344262291,23.27868852459017,19.18032786885246,16.63934426229508,23.27868852459017,19.01639344262295,16.47540983606557,19.918032786885245,20.737704918032787,19.754098360655735,18.114754098360653,10.40983606557377,15.409836065573767,24.50819672131148,22.868852459016395,17.295081…
BCMa	chr2	NonIntact	Mutator_TIR_transposon	2.213114754098363,1.6393442622950833,2.4590163934426252,2.2950819672131164,2.95081967213115,1.8852459016393461,3.6065573770491834,2.2950819672131164,2.4590163934426252,1.6393442622950833,2.2950819672131164,1.6393442622950833,3.852459016393446,2.7868852459
BCMa	chr2	NonIntact	Copia_LTR_retrotransposon	0.0,22.54098360655738,15.49180327868852,12.868852459016395,12.049180327868855,11.557377049180328,16.557377049180324,10.98360655737705,9.59016393442623,10.98360655737705,6.4754098360655705,14.016393442622954,12.54098360655738,4.426229508196726,15.737704918
BCMa	chr2	NonIntact	Gypsy_LTR_retrotransposon	1.8852459016393461,15.901639344262291,17.62295081967213,14.754098360655743,1.3114754098360666,18.114754098360653,15.081967213114758,20.0,10.819672131147541,7.704918032786884,13.524590163934429,7.04918032786885,3.524590163934429,13.606557377049183,8.442622
BCMa	chr2	NonIntact	LTR_retrotransposon	15.737704918032781,15.000000000000004,15.000000000000004,21.229508196721312,9.180327868852459,10.081967213114753,10.573770491803279,14.672131147540988,8.60655737704918,4.426229508196726,12.868852459016395,14.754098360655743,7.9508196721311455,6.4754098360
BCMa	chr2	NonIntact	CACTA_TIR_transposon	15.655737704918028,11.311475409836067,13.442622950819676,14.754098360655743,17.540983606557372,14.262295081967215,20.737704918032787,19.918032786885245,8.114754098360654,10.327868852459018,9.344262295081966,13.934426229508201,12.295081967213116,19.7540983
BCMa	chr2	NonIntact	hAT_TIR_transposon	11.39344262295082,12.786885245901642,17.21311475409836,9.918032786885245,17.950819672131143,20.0,23.852459016393446,14.098360655737707,3.4426229508196755,6.885245901639341,23.36065573770492,7.622950819672129,11.229508196721312,7.377049180327866,21.8852459
BCMa	chr2	NonIntact	helitron	12.95081967213115,20.0,13.524590163934429,14.180327868852462,23.27868852459017,24.34426229508197,16.72131147540983,18.0327868852459,17.377049180327866,21.803278688524593,23.032786885245905,14.836065573770496,12.213114754098363,15.081967213114758,2.6229508
BCMa	chr2	NonIntact	Tc1_Mariner_TIR_transposon	18.770491803278688,7.213114754098358,15.163934426229511,17.950819672131143,17.950819672131143,7.459016393442621,8.196721311475407,16.885245901639344,12.95081967213115,15.573770491803273,10.163934426229508,11.967213114754099,14.672131147540988,23.852459016393446,10.98360655737705,9.836065573770492,17.950819672131143,17.377049180327866,17.86885245901639,4.016393442622954,10.163934426229508,22.62295…
BCMa	chr2	NonIntact	PIF_Harbinger_TIR_transposon	8.196721311475407,14.180327868852462,15.327868852459021,6.803278688524587,12.459016393442624,13.688524590163937,17.1311475409836,12.704918032786887,14.754098360655743,23.60655737704918,22.459016393442624,18.524590163934423,13.524590163934429,9.098360655737704,19.59016393442623,11.475409836065575,24.262295081967217,18.770491803278688,18.196721311475407,14.754098360655743,14.016393442622954,16.0655…
BCMa	chr3	NonIntact	Mutator_TIR_transposon	12.786885245901642,19.0983606557377,10.491803278688524,16.63934426229508,8.278688524590162,17.704918032786882,18.934426229508194,3.9344262295082,9.508196721311474,16.63934426229508,6.4754098360655705,18.688524590163933,20.081967213114755,10.90163934426229
BCMa	chr3	NonIntact	CACTA_TIR_transposon	10.573770491803279,14.262295081967215,13.36065573770492,6.967213114754096,7.786885245901637,13.36065573770492,18.0327868852459,3.524590163934429,9.672131147540982,14.91803278688525,7.04918032786885,0.0,4.180327868852463,4.180327868852463,13.44262295081967
BCMa	chr3	NonIntact	Copia_LTR_retrotransposon	16.557377049180324,16.557377049180324,6.065573770491799,2.786885245901642,3.0327868852459043,2.622950819672133,2.5409836065573796,1.7213114754098378,3.360655737704921,20.737704918032787,18.196721311475407,20.81967213114754,14.426229508196725,14.4262295081
BCMa	chr3	NonIntact	LTR_retrotransposon	16.0655737704918,10.737704918032788,12.704918032786887,1.8852459016393461,16.967213114754095,15.000000000000004,9.672131147540982,15.655737704918028,20.327868852459016,14.754098360655743,6.229508196721308,6.147540983606554,6.229508196721308,6.311475409836
BCMa	chr3	NonIntact	Gypsy_LTR_retrotransposon	17.29508196721311,10.40983606557377,9.180327868852459,20.491803278688526,20.983606557377048,14.754098360655743,9.754098360655737,12.049180327868855,9.344262295081966,7.622950819672129,14.426229508196725,12.622950819672134,3.852459016393446,12.622950819672
BCMa	chr3	NonIntact	Tc1_Mariner_TIR_transposon	21.147540983606557,10.98360655737705,11.229508196721312,9.262295081967212,15.245901639344268,17.786885245901637,18.278688524590162,20.491803278688526,16.0655737704918,8.524590163934425,21.721311475409834,22.54098360655738,14.590163934426233,18.278688524590162,20.327868852459016,21.311475409836063,21.803278688524593,19.59016393442623,18.852459016393443,21.9672131147541,21.393442622950822,17.786885…
BCMa	chr3	NonIntact	hAT_TIR_transposon	14.754098360655743,13.278688524590166,9.180327868852459,9.098360655737704,10.245901639344263,10.573770491803279,12.868852459016395,18.770491803278688,7.868852459016391,7.377049180327866,7.377049180327866,4.9180327868852505,5.081967213114759,15.16393442622
BCMa	chr3	NonIntact	helitron	12.459016393442624,4.9180327868852505,20.245901639344265,18.114754098360653,18.278688524590162,15.409836065573767,19.83606557377049,18.852459016393443,4.426229508196726,4.262295081967217,10.573770491803279,19.83606557377049,18.934426229508194,18.770491803
BCMa	chr3	NonIntact	PIF_Harbinger_TIR_transposon	22.70491803278689,19.262295081967213,16.31147540983606,22.622950819672134,16.31147540983606,21.229508196721312,22.049180327868854,15.901639344262291,13.770491803278691,23.36065573770492,17.62295081967213,8.278688524590162,12.295081967213116,16.31147540983606,6.147540983606554,11.557377049180328,20.81967213114754,11.065573770491802,22.37704918032787,16.63934426229508,16.967213114754095,15.49180327…
BCMa	chr4	NonIntact	Copia_LTR_retrotransposon	0.0,9.426229508196721,4.754098360655742,8.770491803278686,13.032786885245905,13.032786885245905,13.934426229508201,14.836065573770496,12.868852459016395,21.885245901639347,17.29508196721311,7.786885245901637,15.901639344262291,2.7049180327868876,11.721311
BCMa	chr4	NonIntact	Gypsy_LTR_retrotransposon	12.049180327868855,23.27868852459017,23.27868852459017,13.524590163934429,18.114754098360653,20.163934426229506,12.868852459016395,8.360655737704915,5.819672131147537,21.803278688524593,10.901639344262296,23.114754098360656,10.737704918032788,8.0327868852
BCMa	chr4	NonIntact	Mutator_TIR_transposon	14.016393442622954,7.04918032786885,14.098360655737707,12.213114754098363,15.327868852459021,2.2950819672131164,2.1311475409836085,2.7049180327868876,1.393442622950821,2.2950819672131164,1.393442622950821,3.1967213114754123,2.5409836065573796,2.7049180327
BCMa	chr4	NonIntact	LTR_retrotransposon	14.50819672131148,16.147540983606554,11.475409836065575,8.60655737704918,6.393442622950817,13.934426229508201,2.786885245901642,15.655737704918028,20.655737704918035,7.295081967213112,5.819672131147537,6.721311475409832,3.9344262295082,2.622950819672133,3
BCMa	chr4	NonIntact	CACTA_TIR_transposon	13.688524590163937,11.721311475409838,17.950819672131143,15.737704918032781,21.229508196721312,10.655737704918032,12.95081967213115,16.557377049180324,14.50819672131148,18.606557377049178,20.491803278688526,20.573770491803277,21.065573770491806,18.8524590
BCMa	chr4	NonIntact	PIF_Harbinger_TIR_transposon	14.754098360655743,10.0,15.901639344262291,15.000000000000004,22.459016393442624,14.590163934426233,13.770491803278691,13.688524590163937,9.754098360655737,16.22950819672131,21.721311475409834,12.622950819672134,23.27868852459017,16.393442622950815,21.311475409836063,24.262295081967217,18.934426229508194,20.983606557377048,19.344262295081965,18.852459016393443,19.508196721311474,20.0,13.934426229…
BCMa	chr4	NonIntact	helitron	18.278688524590162,23.442622950819676,12.131147540983608,12.459016393442624,23.114754098360656,23.114754098360656,16.557377049180324,20.163934426229506,16.31147540983606,14.91803278688525,10.737704918032788,23.032786885245905,13.114754098360658,12.6229508
BCMa	chr4	NonIntact	hAT_TIR_transposon	16.22950819672131,3.7704918032786923,4.672131147540988,14.50819672131148,15.901639344262291,12.37704918032787,16.63934426229508,11.639344262295085,3.1147540983606588,13.770491803278691,5.245901639344258,14.262295081967215,17.704918032786882,11.22950819672
BCMa	chr4	NonIntact	Tc1_Mariner_TIR_transposon	12.37704918032787,13.196721311475413,14.016393442622954,11.557377049180328,17.950819672131143,11.147540983606559,17.704918032786882,18.442622950819672,20.245901639344265,19.83606557377049,18.442622950819672,23.36065573770492,10.491803278688524,9.836065573770492,18.770491803278688,20.573770491803277,12.213114754098363,18.524590163934423,18.0327868852459,22.622950819672134,10.737704918032788,9.1803…
BCMa	chr5	NonIntact	Mutator_TIR_transposon	2.4590163934426252,0.9016393442622959,1.8032786885245917,3.524590163934429,4.754098360655742,2.213114754098363,3.1147540983606588,2.2950819672131164,3.1967213114754123,1.6393442622950833,2.4590163934426252,2.5409836065573796,2.95081967213115,2.78688524590
BCMa	chr5	NonIntact	hAT_TIR_transposon	18.770491803278688,14.672131147540988,5.655737704918029,6.721311475409832,8.770491803278686,18.524590163934423,14.672131147540988,21.311475409836063,23.36065573770492,16.72131147540983,18.606557377049178,15.163934426229511,16.72131147540983,21.63934426229
BCMa	chr5	NonIntact	LTR_retrotransposon	2.377049180327871,15.245901639344268,2.786885245901642,1.8032786885245917,0.5737704918032791,6.5573770491803245,5.409836065573766,2.4590163934426252,3.2786885245901667,3.360655737704921,3.4426229508196755,5.819672131147537,13.606557377049183,13.6065573770
BCMa	chr5	NonIntact	CACTA_TIR_transposon	11.311475409836067,15.327868852459021,15.245901639344268,13.770491803278691,9.918032786885245,10.0,9.754098360655737,14.754098360655743,15.49180327868852,17.540983606557372,6.311475409836063,11.311475409836067,15.245901639344268,10.081967213114753,16.4754
BCMa	chr5	NonIntact	Copia_LTR_retrotransposon	11.639344262295085,10.491803278688524,12.704918032786887,21.475409836065577,19.508196721311474,7.786885245901637,5.409836065573766,3.2786885245901667,10.737704918032788,6.6393442622950785,4.426229508196726,3.1147540983606588,10.819672131147541,11.63934426
BCMa	chr5	NonIntact	helitron	19.59016393442623,17.21311475409836,14.426229508196725,15.409836065573767,15.737704918032781,14.426229508196725,14.262295081967215,15.573770491803273,4.9180327868852505,11.967213114754099,4.180327868852463,18.688524590163933,18.278688524590162,14.01639344
BCMa	chr5	NonIntact	Gypsy_LTR_retrotransposon	16.31147540983606,10.491803278688524,17.29508196721311,17.950819672131143,20.491803278688526,11.065573770491802,15.245901639344268,18.770491803278688,21.311475409836063,23.032786885245905,17.950819672131143,23.032786885245905,8.770491803278686,21.80327868
BCMa	chr5	NonIntact	PIF_Harbinger_TIR_transposon	18.852459016393443,15.901639344262291,4.590163934426233,4.9180327868852505,11.311475409836067,12.37704918032787,9.836065573770492,11.065573770491802,7.786885245901637,17.86885245901639,21.803278688524593,15.983606557377046,15.819672131147538,12.295081967213116,10.081967213114753,5.901639344262291,12.213114754098363,11.967213114754099,10.327868852459018,20.163934426229506,13.606557377049183,15.409…
BCMa	chr5	NonIntact	Tc1_Mariner_TIR_transposon	20.491803278688526,18.934426229508194,3.6065573770491834,18.360655737704917,22.78688524590164,7.459016393442621,17.377049180327866,14.262295081967215,16.967213114754095,14.098360655737707,6.393442622950817,20.491803278688526,20.081967213114755,18.0327868852459,9.836065573770492,24.590163934426233,17.540983606557372,13.688524590163937,8.442622950819672,9.01639344262295,17.45901639344262,16.3114754…
BCMa	chr6	NonIntact	Mutator_TIR_transposon	3.1147540983606588,3.0327868852459043,3.6065573770491834,1.8852459016393461,2.7049180327868876,2.2950819672131164,3.1967213114754123,3.0327868852459043,3.852459016393446,2.1311475409836085,2.7049180327868876,1.8852459016393461,2.4590163934426252,2.8688524
BCMa	chr6	NonIntact	LTR_retrotransposon	5.49180327868852,15.655737704918028,1.7213114754098378,2.1311475409836085,13.278688524590166,19.59016393442623,13.934426229508201,4.590163934426233,4.590163934426233,11.639344262295085,4.9180327868852505,8.770491803278686,17.04918032786885,16.967213114754
BCMa	chr6	NonIntact	Copia_LTR_retrotransposon	13.032786885245905,10.081967213114753,12.213114754098363,12.213114754098363,13.032786885245905,11.885245901639346,10.573770491803279,12.622950819672134,11.229508196721312,12.868852459016395,8.852459016393441,13.114754098360658,9.508196721311474,3.68852459
BCMa	chr6	NonIntact	CACTA_TIR_transposon	15.245901639344268,10.737704918032788,11.39344262295082,10.163934426229508,16.72131147540983,16.393442622950815,22.622950819672134,9.672131147540982,11.147540983606559,17.21311475409836,15.901639344262291,21.639344262295083,22.049180327868854,3.9344262295
BCMa	chr6	NonIntact	helitron	4.344262295081971,8.770491803278686,14.590163934426233,17.540983606557372,21.803278688524593,17.1311475409836,14.262295081967215,17.377049180327866,19.83606557377049,3.9344262295082,8.688524590163933,14.426229508196725,16.885245901639344,16.63934426229508
BCMa	chr6	NonIntact	Gypsy_LTR_retrotransposon	6.393442622950817,13.442622950819676,13.032786885245905,19.918032786885245,15.245901639344268,5.081967213114759,17.62295081967213,15.983606557377046,18.196721311475407,23.032786885245905,6.065573770491799,4.016393442622954,16.557377049180324,4.91803278688
BCMa	chr6	NonIntact	PIF_Harbinger_TIR_transposon	10.0,20.0,3.1967213114754123,15.573770491803273,19.42622950819672,20.163934426229506,17.950819672131143,20.0,11.80327868852459,14.672131147540988,16.0655737704918,13.934426229508201,13.852459016393446,15.081967213114758,16.0655737704918,9.672131147540982,17.45901639344262,16.72131147540983,17.1311475409836,8.360655737704915,19.754098360655735,12.37704918032787,17.29508196721311,17.29508196721311,…
BCMa	chr6	NonIntact	Tc1_Mariner_TIR_transposon	23.114754098360656,13.606557377049183,20.737704918032787,18.278688524590162,23.032786885245905,16.885245901639344,18.688524590163933,12.459016393442624,10.819672131147541,16.803278688524586,14.754098360655743,17.29508196721311,17.29508196721311,19.01639344262295,14.016393442622954,6.4754098360655705,16.803278688524586,21.393442622950822,7.786885245901637,7.868852459016391,13.278688524590166,18.03…
BCMa	chr6	NonIntact	hAT_TIR_transposon	17.704918032786882,17.86885245901639,21.803278688524593,18.0327868852459,6.311475409836063,7.213114754098358,14.836065573770496,14.672131147540988,2.95081967213115,16.0655737704918,13.852459016393446,21.229508196721312,16.63934426229508,4.50819672131148,1
BCMa	chr7	NonIntact	Mutator_TIR_transposon	2.2950819672131164,1.8852459016393461,3.360655737704921,2.2950819672131164,3.360655737704921,1.8852459016393461,3.1967213114754123,2.5409836065573796,3.6065573770491834,2.2950819672131164,3.360655737704921,2.1311475409836085,2.95081967213115,2.37704918032
BCMa	chr7	NonIntact	LTR_retrotransposon	15.737704918032781,6.6393442622950785,9.098360655737704,6.393442622950817,19.344262295081965,18.934426229508194,16.72131147540983,2.213114754098363,19.18032786885246,10.901639344262296,10.655737704918032,12.37704918032787,6.147540983606554,18.606557377049
BCMa	chr7	NonIntact	CACTA_TIR_transposon	21.393442622950822,20.0,22.78688524590164,12.295081967213116,18.278688524590162,7.459016393442621,14.098360655737707,16.0655737704918,12.868852459016395,13.278688524590166,16.557377049180324,20.163934426229506,18.934426229508194,10.655737704918032,12.1311
BCMa	chr7	NonIntact	helitron	18.852459016393443,17.950819672131143,17.540983606557372,13.852459016393446,18.688524590163933,20.491803278688526,7.459016393442621,23.27868852459017,16.557377049180324,22.54098360655738,16.22950819672131,16.147540983606554,13.196721311475413,10.573770491
BCMa	chr7	NonIntact	PIF_Harbinger_TIR_transposon	21.475409836065577,15.819672131147538,15.49180327868852,15.655737704918028,22.37704918032787,20.81967213114754,13.606557377049183,14.754098360655743,12.868852459016395,23.442622950819676,16.885245901639344,15.573770491803273,7.377049180327866,19.42622950819672,8.60655737704918,10.0,14.262295081967215,13.606557377049183,18.688524590163933,14.098360655737707,11.475409836065575,23.27868852459017,7.2…
BCMa	chr7	NonIntact	hAT_TIR_transposon	17.21311475409836,13.278688524590166,19.754098360655735,17.1311475409836,13.442622950819676,20.901639344262293,16.0655737704918,15.49180327868852,16.557377049180324,12.131147540983608,23.36065573770492,17.950819672131143,13.442622950819676,19.016393442622
BCMa	chr7	NonIntact	Copia_LTR_retrotransposon	11.147540983606559,16.47540983606557,16.72131147540983,22.213114754098363,13.852459016393446,20.491803278688526,20.573770491803277,15.163934426229511,3.9344262295082,4.098360655737708,17.786885245901637,19.0983606557377,18.524590163934423,23.6065573770491
BCMa	chr7	NonIntact	Tc1_Mariner_TIR_transposon	19.262295081967213,21.803278688524593,18.0327868852459,16.22950819672131,16.22950819672131,11.311475409836067,17.29508196721311,17.540983606557372,16.967213114754095,10.573770491803279,10.901639344262296,10.737704918032788,16.803278688524586,20.655737704918035,19.01639344262295,15.409836065573767,19.42622950819672,16.885245901639344,15.819672131147538,0.0,19.0983606557377,20.327868852459016,20.16…
BCMa	chr7	NonIntact	Gypsy_LTR_retrotransposon	9.59016393442623,15.901639344262291,19.918032786885245,19.83606557377049,9.180327868852459,8.278688524590162,8.688524590163933,9.01639344262295,12.95081967213115,7.04918032786885,10.245901639344263,9.754098360655737,12.54098360655738,19.0983606557377,15.2
BCMa	chr8	NonIntact	Gypsy_LTR_retrotransposon	18.688524590163933,8.278688524590162,5.737704918032783,2.1311475409836085,16.22950819672131,13.852459016393446,10.98360655737705,13.196721311475413,13.606557377049183,8.114754098360654,3.4426229508196755,3.7704918032786923,1.393442622950821,8.114754098360
BCMa	chr8	NonIntact	LTR_retrotransposon	18.688524590163933,8.196721311475407,16.47540983606557,3.0327868852459043,11.80327868852459,4.754098360655742,8.60655737704918,2.8688524590163964,7.540983606557375,5.409836065573766,5.655737704918029,3.524590163934429,4.098360655737708,3.4426229508196755,
BCMa	chr8	NonIntact	CACTA_TIR_transposon	12.54098360655738,19.42622950819672,13.524590163934429,13.36065573770492,13.196721311475413,15.573770491803273,13.196721311475413,13.196721311475413,17.86885245901639,12.54098360655738,15.000000000000004,14.262295081967215,14.672131147540988,12.5409836065
BCMa	chr8	NonIntact	helitron	11.147540983606559,13.114754098360658,12.868852459016395,22.213114754098363,23.114754098360656,18.196721311475407,2.4590163934426252,17.377049180327866,18.688524590163933,18.278688524590162,11.639344262295085,9.672131147540982,8.0327868852459,11.229508196
BCMa	chr8	NonIntact	hAT_TIR_transposon	19.262295081967213,12.704918032786887,3.2786885245901667,10.245901639344263,18.442622950819672,10.40983606557377,10.081967213114753,23.934426229508198,2.622950819672133,14.590163934426233,17.62295081967213,7.704918032786884,17.1311475409836,12.95081967213
BCMa	chr8	NonIntact	Copia_LTR_retrotransposon	15.163934426229511,11.721311475409838,10.573770491803279,14.50819672131148,8.770491803278686,9.180327868852459,13.36065573770492,20.901639344262293,19.262295081967213,8.770491803278686,4.016393442622954,9.180327868852459,12.868852459016395,8.6885245901639
BCMa	chr8	NonIntact	Mutator_TIR_transposon	9.672131147540982,13.852459016393446,13.688524590163937,13.688524590163937,13.934426229508201,13.852459016393446,14.016393442622954,11.639344262295085,14.344262295081972,11.885245901639346,7.04918032786885,15.163934426229511,14.262295081967215,14.01639344
BCMa	chr8	NonIntact	PIF_Harbinger_TIR_transposon	24.180327868852462,10.163934426229508,17.21311475409836,9.426229508196721,15.327868852459021,5.983606557377045,9.754098360655737,23.27868852459017,22.131147540983605,15.983606557377046,13.852459016393446,6.721311475409832,12.37704918032787,16.393442622950815,11.39344262295082,4.50819672131148,19.0983606557377,2.4590163934426252,19.672131147540984,23.27868852459017,9.426229508196721,11.80327868852…
BCMa	chr8	NonIntact	Tc1_Mariner_TIR_transposon	9.672131147540982,10.491803278688524,10.0,18.606557377049178,20.491803278688526,15.000000000000004,21.885245901639347,22.78688524590164,18.852459016393443,19.83606557377049,9.01639344262295,23.114754098360656,24.016393442622952,11.39344262295082,9.426229508196721,17.704918032786882,9.59016393442623,16.0655737704918,19.672131147540984,14.180327868852462,11.721311475409838,15.819672131147538,11.967…
BCMa	chr9	NonIntact	Tc1_Mariner_TIR_transposon	11.557377049180328,13.36065573770492,15.655737704918028,11.557377049180328,11.721311475409838,18.0327868852459,12.459016393442624,14.098360655737707,11.721311475409838,13.36065573770492,11.557377049180328,16.967213114754095,24.016393442622952,17.29508196721311,17.1311475409836,11.557377049180328,11.721311475409838,14.836065573770496,19.0983606557377,19.18032786885246,12.54098360655738,8.934426229…
BCMa	chr9	NonIntact	Mutator_TIR_transposon	20.491803278688526,18.770491803278688,20.491803278688526,17.86885245901639,1.8852459016393461,1.6393442622950833,2.2950819672131164,1.8852459016393461,2.4590163934426252,1.393442622950821,2.2950819672131164,1.8852459016393461,2.7049180327868876,3.27868852
BCMa	chr9	NonIntact	helitron	24.262295081967217,24.426229508196727,14.262295081967215,5.983606557377045,12.459016393442624,14.262295081967215,8.442622950819672,20.0,7.9508196721311455,18.196721311475407,14.590163934426233,14.016393442622954,9.01639344262295,20.81967213114754,20.32786
BCMa	chr9	NonIntact	Copia_LTR_retrotransposon	7.868852459016391,0.98360655737705,3.852459016393446,0.0,7.540983606557375,0.98360655737705,13.852459016393446,20.81967213114754,9.918032786885245,11.475409836065575,13.032786885245905,2.786885245901642,13.114754098360658,9.836065573770492,15.491803278688
BCMa	chr9	NonIntact	CACTA_TIR_transposon	18.360655737704917,13.36065573770492,23.032786885245905,23.114754098360656,13.114754098360658,0.5737704918032791,4.180327868852463,1.1475409836065582,16.147540983606554,20.40983606557377,17.540983606557372,18.442622950819672,8.196721311475407,13.032786885
BCMa	chr9	NonIntact	Gypsy_LTR_retrotransposon	14.262295081967215,14.91803278688525,14.50819672131148,15.983606557377046,16.0655737704918,7.868852459016391,19.59016393442623,18.278688524590162,9.180327868852459,16.147540983606554,15.901639344262291,10.901639344262296,16.557377049180324,11.229508196721
BCMa	chr9	NonIntact	LTR_retrotransposon	1.393442622950821,16.47540983606557,2.1311475409836085,7.213114754098358,16.0655737704918,20.327868852459016,5.245901639344258,22.049180327868854,12.131147540983608,13.032786885245905,5.081967213114759,5.245901639344258,11.065573770491802,15.7377049180327
BCMa	chr9	NonIntact	hAT_TIR_transposon	10.081967213114753,6.803278688524587,7.131147540983603,5.245901639344258,23.934426229508198,14.426229508196725,11.721311475409838,13.442622950819676,16.147540983606554,10.901639344262296,0.0,17.1311475409836,19.0983606557377,11.229508196721312,5.901639344
BCMa	chr9	NonIntact	PIF_Harbinger_TIR_transposon	16.393442622950815,22.295081967213118,22.459016393442624,20.245901639344265,21.475409836065577,24.590163934426233,14.91803278688525,14.836065573770496,16.0655737704918,7.04918032786885,18.196721311475407,16.0655737704918,15.49180327868852,22.70491803278689,14.836065573770496,22.213114754098363,16.803278688524586,10.655737704918032,11.639344262295085,13.196721311475413,6.885245901639341,18.0327868…
BCMa	chrX	NonIntact	Mutator_TIR_transposon	3.9344262295082,2.2950819672131164,3.852459016393446,2.5409836065573796,2.7049180327868876,3.524590163934429,3.6065573770491834,2.5409836065573796,3.6065573770491834,3.688524590163938,3.6065573770491834,2.5409836065573796,3.6065573770491834,2.295081967213
BCMa	chrX	NonIntact	LTR_retrotransposon	18.196721311475407,15.327868852459021,13.852459016393446,7.622950819672129,11.639344262295085,15.737704918032781,9.180327868852459,12.459016393442624,7.868852459016391,16.967213114754095,13.196721311475413,2.622950819672133,16.557377049180324,5.5737704918
BCMa	chrX	NonIntact	Copia_LTR_retrotransposon	11.229508196721312,11.229508196721312,9.508196721311474,18.360655737704917,12.049180327868855,11.557377049180328,11.557377049180328,8.852459016393441,12.868852459016395,12.049180327868855,6.147540983606554,6.967213114754096,13.032786885245905,6.8032786885
BCMa	chrX	NonIntact	hAT_TIR_transposon	21.885245901639347,4.344262295081971,6.5573770491803245,22.70491803278689,16.967213114754095,17.29508196721311,21.639344262295083,21.475409836065577,11.065573770491802,4.590163934426233,20.081967213114755,12.459016393442624,15.409836065573767,5.1639344262
BCMa	chrX	NonIntact	CACTA_TIR_transposon	16.147540983606554,8.196721311475407,14.344262295081972,24.016393442622952,21.147540983606557,11.475409836065575,14.91803278688525,20.40983606557377,18.0327868852459,16.147540983606554,2.622950819672133,11.721311475409838,17.86885245901639,21.311475409836
BCMa	chrX	NonIntact	helitron	6.721311475409832,19.344262295081965,13.524590163934429,18.524590163934423,15.737704918032781,16.147540983606554,20.081967213114755,15.49180327868852,11.557377049180328,22.37704918032787,4.9180327868852505,20.655737704918035,19.0983606557377,17.2950819672
BCMa	chrX	NonIntact	Gypsy_LTR_retrotransposon	16.47540983606557,18.934426229508194,19.508196721311474,10.245901639344263,16.557377049180324,21.9672131147541,2.7049180327868876,1.9672131147541,21.639344262295083,21.393442622950822,14.91803278688525,0.8196721311475417,21.065573770491806,16.475409836065
BCMa	chrX	NonIntact	Tc1_Mariner_TIR_transposon	22.868852459016395,10.163934426229508,16.72131147540983,18.852459016393443,17.950819672131143,10.491803278688524,11.967213114754099,19.83606557377049,17.704918032786882,13.688524590163937,20.245901639344265,22.70491803278689,18.360655737704917,5.081967213114759,4.262295081967217,17.62295081967213,20.655737704918035,16.72131147540983,7.459016393442621,17.86885245901639,21.475409836065577,17.049180…
BCMa	chrX	NonIntact	PIF_Harbinger_TIR_transposon	14.836065573770496,17.950819672131143,5.409836065573766,11.147540983606559,15.163934426229511,21.229508196721312,15.737704918032781,18.0327868852459,12.704918032786887,20.655737704918035,11.475409836065575,15.409836065573767,20.0,19.754098360655735,11.065
BCMb	chr1	NonIntact	Gypsy_LTR_retrotransposon	8.442622950819672,17.86885245901639,16.885245901639344,1.0655737704918042,2.8688524590163964,1.5573770491803294,10.081967213114753,3.360655737704921,6.311475409836063,6.803278688524587,2.213114754098363,2.213114754098363,2.8688524590163964,1.5573770491803
BCMb	chr1	NonIntact	Copia_LTR_retrotransposon	18.442622950819672,17.377049180327866,7.131147540983603,5.000000000000004,4.672131147540988,11.475409836065575,8.442622950819672,10.40983606557377,5.901639344262291,18.278688524590162,21.721311475409834,20.163934426229506,6.147540983606554,12.459016393442
BCMb	chr1	NonIntact	hAT_TIR_transposon	18.852459016393443,19.262295081967213,8.196721311475407,13.934426229508201,12.868852459016395,11.721311475409838,10.163934426229508,11.721311475409838,9.180327868852459,23.77049180327869,14.016393442622954,8.442622950819672,5.1639344262295035,12.540983606
BCMb	chr1	NonIntact	CACTA_TIR_transposon	17.704918032786882,17.704918032786882,14.426229508196725,11.639344262295085,15.655737704918028,6.065573770491799,17.29508196721311,12.213114754098363,14.262295081967215,4.098360655737708,8.60655737704918,7.622950819672129,7.868852459016391,14.180327868852
BCMb	chr1	NonIntact	helitron	13.770491803278691,17.04918032786885,7.131147540983603,10.491803278688524,15.163934426229511,19.344262295081965,1.475409836065575,8.442622950819672,10.819672131147541,12.131147540983608,16.147540983606554,19.508196721311474,22.78688524590164,19.0163934426
BCMb	chr1	NonIntact	Tc1_Mariner_TIR_transposon	13.524590163934429,9.59016393442623,13.934426229508201,21.065573770491806,22.95081967213115,23.36065573770492,11.967213114754099,21.147540983606557,11.885245901639346,13.36065573770492,16.47540983606557,18.442622950819672,16.22950819672131,9.836065573770492,19.344262295081965,15.573770491803273,17.540983606557372,20.40983606557377,11.311475409836067,18.278688524590162,17.04918032786885,18.5245901…
BCMb	chr1	NonIntact	Mutator_TIR_transposon	8.442622950819672,11.475409836065575,18.606557377049178,18.934426229508194,16.72131147540983,22.70491803278689,14.262295081967215,3.688524590163938,13.36065573770492,16.885245901639344,8.278688524590162,13.688524590163937,13.688524590163937,5.737704918032
BCMb	chr1	NonIntact	LTR_retrotransposon	8.0327868852459,1.8032786885245917,3.852459016393446,17.704918032786882,17.1311475409836,1.2295081967213126,3.1147540983606588,1.393442622950821,17.86885245901639,17.86885245901639,20.245901639344265,21.639344262295083,5.983606557377045,6.393442622950817,
BCMb	chr1	NonIntact	PIF_Harbinger_TIR_transposon	19.18032786885246,19.508196721311474,24.180327868852462,21.9672131147541,12.622950819672134,13.770491803278691,20.327868852459016,16.0655737704918,23.27868852459017,19.672131147540984,24.016393442622952,23.60655737704918,10.737704918032788,13.770491803278691,23.032786885245905,23.36065573770492,18.196721311475407,23.27868852459017,15.573770491803273,17.950819672131143,16.147540983606554,9.6721311…
BCMb	chr2	NonIntact	helitron	19.0983606557377,16.0655737704918,16.0655737704918,13.688524590163937,12.295081967213116,17.29508196721311,18.934426229508194,21.721311475409834,18.770491803278688,10.901639344262296,15.49180327868852,20.081967213114755,19.344262295081965,12.8688524590163
BCMb	chr2	NonIntact	Copia_LTR_retrotransposon	13.278688524590166,13.196721311475413,13.688524590163937,7.295081967213112,7.786885245901637,8.852459016393441,9.59016393442623,12.049180327868855,16.72131147540983,15.983606557377046,16.393442622950815,21.229508196721312,23.852459016393446,11.47540983606
BCMb	chr2	NonIntact	LTR_retrotransposon	2.8688524590163964,11.065573770491802,6.6393442622950785,11.311475409836067,12.704918032786887,4.50819672131148,5.327868852459011,5.245901639344258,4.672131147540988,11.885245901639346,7.9508196721311455,6.803278688524587,4.9180327868852505,12.62295081967
BCMb	chr2	NonIntact	Mutator_TIR_transposon	5.819672131147537,4.50819672131148,6.147540983606554,6.885245901639341,12.459016393442624,4.016393442622954,2.8688524590163964,5.245901639344258,6.065573770491799,6.6393442622950785,7.04918032786885,15.983606557377046,18.278688524590162,17.1311475409836,1
BCMb	chr2	NonIntact	Gypsy_LTR_retrotransposon	6.967213114754096,11.967213114754099,12.459016393442624,12.049180327868855,15.655737704918028,6.311475409836063,15.245901639344268,10.655737704918032,19.42622950819672,22.622950819672134,22.622950819672134,10.491803278688524,17.540983606557372,15.40983606
BCMb	chr2	NonIntact	CACTA_TIR_transposon	23.36065573770492,5.49180327868852,16.147540983606554,15.245901639344268,15.081967213114758,20.081967213114755,10.081967213114753,19.918032786885245,19.0983606557377,14.50819672131148,11.639344262295085,22.868852459016395,9.754098360655737,19.098360655737
BCMb	chr2	NonIntact	hAT_TIR_transposon	13.606557377049183,12.131147540983608,16.147540983606554,15.819672131147538,18.852459016393443,11.80327868852459,16.72131147540983,6.721311475409832,11.475409836065575,12.049180327868855,16.885245901639344,24.09836065573771,11.639344262295085,7.2950819672
BCMb	chr2	NonIntact	Tc1_Mariner_TIR_transposon	18.934426229508194,14.016393442622954,16.31147540983606,13.852459016393446,11.967213114754099,13.524590163934429,9.672131147540982,8.934426229508196,16.885245901639344,18.852459016393443,21.311475409836063,13.114754098360658,19.18032786885246,19.59016393442623,21.639344262295083,20.983606557377048,19.01639344262295,12.459016393442624,7.377049180327866,6.885245901639341,9.672131147540982,9.0163934…
BCMb	chr2	NonIntact	PIF_Harbinger_TIR_transposon	12.459016393442624,19.01639344262295,21.311475409836063,17.950819672131143,18.196721311475407,17.04918032786885,16.31147540983606,18.114754098360653,23.19672131147541,19.18032786885246,19.918032786885245,15.573770491803273,17.29508196721311,22.54098360655738,23.77049180327869,20.40983606557377,23.852459016393446,23.114754098360656,11.475409836065575,21.9672131147541,23.032786885245905,21.96721311…
BCMb	chr3	NonIntact	Mutator_TIR_transposon	3.9344262295082,8.770491803278686,12.704918032786887,11.229508196721312,14.754098360655743,21.147540983606557,22.622950819672134,13.196721311475413,14.180327868852462,11.311475409836067,23.032786885245905,18.852459016393443,20.655737704918035,11.311475409
BCMb	chr3	NonIntact	LTR_retrotransposon	13.36065573770492,10.081967213114753,7.868852459016391,3.852459016393446,6.311475409836063,4.426229508196726,9.344262295081966,3.524590163934429,15.163934426229511,4.262295081967217,18.442622950819672,8.524590163934425,17.21311475409836,6.967213114754096,
BCMb	chr3	NonIntact	CACTA_TIR_transposon	5.327868852459011,19.0983606557377,6.147540983606554,15.819672131147538,12.95081967213115,15.163934426229511,17.45901639344262,6.229508196721308,12.459016393442624,19.262295081967213,15.737704918032781,22.295081967213118,10.327868852459018,18.770491803278
BCMb	chr3	NonIntact	Gypsy_LTR_retrotransposon	20.491803278688526,15.000000000000004,1.0655737704918042,3.852459016393446,15.901639344262291,9.180327868852459,14.098360655737707,18.114754098360653,15.49180327868852,4.344262295081971,6.229508196721308,3.7704918032786923,12.049180327868855,5.65573770491
BCMb	chr3	NonIntact	helitron	18.852459016393443,16.63934426229508,20.327868852459016,13.688524590163937,4.50819672131148,15.901639344262291,14.672131147540988,3.4426229508196755,14.180327868852462,4.016393442622954,3.6065573770491834,2.8688524590163964,15.901639344262291,16.475409836
BCMb	chr3	NonIntact	Copia_LTR_retrotransposon	11.147540983606559,5.1639344262295035,11.147540983606559,10.98360655737705,10.573770491803279,8.0327868852459,11.475409836065575,19.0983606557377,7.622950819672129,15.081967213114758,8.442622950819672,21.147540983606557,19.344262295081965,9.18032786885245
BCMb	chr3	NonIntact	PIF_Harbinger_TIR_transposon	22.54098360655738,22.295081967213118,19.754098360655735,17.540983606557372,19.672131147540984,13.278688524590166,14.50819672131148,17.377049180327866,24.016393442622952,9.098360655737704,9.426229508196721,15.901639344262291,15.819672131147538,20.0,17.86885245901639,15.49180327868852,17.704918032786882,19.344262295081965,16.47540983606557,15.409836065573767,21.229508196721312,21.9672131147541,17.8…
BCMb	chr3	NonIntact	hAT_TIR_transposon	18.688524590163933,16.557377049180324,16.47540983606557,10.40983606557377,15.819672131147538,8.688524590163933,11.639344262295085,16.147540983606554,8.278688524590162,7.704918032786884,12.54098360655738,20.983606557377048,6.065573770491799,19.098360655737
BCMb	chr3	NonIntact	Tc1_Mariner_TIR_transposon	18.852459016393443,13.36065573770492,21.475409836065577,15.000000000000004,10.491803278688524,13.852459016393446,12.131147540983608,9.836065573770492,10.0,15.000000000000004,11.147540983606559,15.983606557377046,16.47540983606557,18.852459016393443,12.868852459016395,23.032786885245905,14.91803278688525,14.590163934426233,11.80327868852459,22.95081967213115,11.721311475409838,9.508196721311474,9.…
BCMb	chr4	NonIntact	Gypsy_LTR_retrotransposon	20.245901639344265,14.754098360655743,23.934426229508198,12.37704918032787,8.934426229508196,17.29508196721311,4.344262295081971,8.934426229508196,13.442622950819676,21.9672131147541,4.426229508196726,22.213114754098363,17.786885245901637,6.96721311475409
BCMb	chr4	NonIntact	Copia_LTR_retrotransposon	10.901639344262296,10.901639344262296,12.37704918032787,6.885245901639341,11.475409836065575,8.934426229508196,16.47540983606557,2.377049180327871,1.9672131147541,8.524590163934425,15.819672131147538,12.049180327868855,5.327868852459011,10.491803278688524
BCMb	chr4	NonIntact	LTR_retrotransposon	12.295081967213116,12.786885245901642,4.016393442622954,8.360655737704915,12.786885245901642,3.6065573770491834,4.344262295081971,12.459016393442624,10.40983606557377,13.032786885245905,10.40983606557377,5.245901639344258,15.49180327868852,14.180327868852
BCMb	chr4	NonIntact	PIF_Harbinger_TIR_transposon	22.37704918032787,16.803278688524586,15.901639344262291,19.754098360655735,4.180327868852463,18.360655737704917,8.60655737704918,15.49180327868852,17.950819672131143,15.163934426229511,23.19672131147541,20.81967213114754,20.81967213114754,17.704918032786882,22.622950819672134,13.442622950819676,13.524590163934429,17.21311475409836,20.163934426229506,23.934426229508198,10.327868852459018,5.8196721…
BCMb	chr4	NonIntact	CACTA_TIR_transposon	7.131147540983603,9.180327868852459,16.72131147540983,11.311475409836067,12.295081967213116,17.29508196721311,14.50819672131148,14.91803278688525,13.278688524590166,15.655737704918028,16.885245901639344,19.83606557377049,11.639344262295085,15.491803278688
BCMb	chr4	NonIntact	Mutator_TIR_transposon	10.163934426229508,10.163934426229508,4.590163934426233,12.213114754098363,4.098360655737708,2.95081967213115,6.311475409836063,14.50819672131148,10.081967213114753,7.622950819672129,4.262295081967217,4.9180327868852505,4.8360655737704965,22.1311475409836
BCMb	chr4	NonIntact	helitron	19.42622950819672,21.147540983606557,21.311475409836063,16.0655737704918,12.868852459016395,16.967213114754095,12.37704918032787,19.672131147540984,16.557377049180324,21.475409836065577,15.573770491803273,16.393442622950815,10.081967213114753,10.0,15.0000
BCMb	chr4	NonIntact	hAT_TIR_transposon	11.639344262295085,15.163934426229511,10.40983606557377,11.967213114754099,9.918032786885245,1.3114754098360666,17.377049180327866,14.672131147540988,17.45901639344262,18.524590163934423,21.557377049180328,17.704918032786882,19.508196721311474,11.31147540
BCMb	chr4	NonIntact	Tc1_Mariner_TIR_transposon	17.950819672131143,21.803278688524593,16.72131147540983,8.60655737704918,16.393442622950815,10.327868852459018,9.262295081967212,9.918032786885245,17.21311475409836,16.22950819672131,16.0655737704918,14.590163934426233,19.18032786885246,10.327868852459018,15.409836065573767,13.524590163934429,11.885245901639346,16.63934426229508,13.196721311475413,12.37704918032787,12.95081967213115,16.7213114754…
BCMb	chr5	NonIntact	Copia_LTR_retrotransposon	12.54098360655738,14.590163934426233,18.606557377049178,7.540983606557375,5.409836065573766,8.442622950819672,9.754098360655737,9.098360655737704,12.295081967213116,12.54098360655738,14.590163934426233,18.606557377049178,7.131147540983603,5.40983606557376
BCMb	chr5	NonIntact	Mutator_TIR_transposon	8.852459016393441,15.163934426229511,11.721311475409838,5.901639344262291,10.163934426229508,8.852459016393441,18.934426229508194,9.918032786885245,20.737704918032787,16.147540983606554,2.7049180327868876,9.426229508196721,12.786885245901642,4.01639344262
BCMb	chr5	NonIntact	LTR_retrotransposon	10.573770491803279,19.59016393442623,4.426229508196726,8.688524590163933,10.573770491803279,19.59016393442623,10.901639344262296,12.459016393442624,10.327868852459018,9.426229508196721,12.54098360655738,4.098360655737708,3.6065573770491834,6.9672131147540
BCMb	chr5	NonIntact	helitron	16.393442622950815,13.36065573770492,10.655737704918032,16.393442622950815,13.36065573770492,19.672131147540984,13.032786885245905,13.770491803278691,5.655737704918029,19.42622950819672,12.37704918032787,16.47540983606557,3.1967213114754123,12.86885245901
BCMb	chr5	NonIntact	CACTA_TIR_transposon	17.86885245901639,15.163934426229511,14.098360655737707,14.836065573770496,10.40983606557377,14.672131147540988,17.86885245901639,15.163934426229511,8.442622950819672,9.836065573770492,14.344262295081972,13.688524590163937,9.01639344262295,6.2295081967213
BCMb	chr5	NonIntact	hAT_TIR_transposon	15.081967213114758,15.327868852459021,15.081967213114758,15.327868852459021,4.672131147540988,4.50819672131148,4.016393442622954,5.245901639344258,19.918032786885245,8.688524590163933,13.770491803278691,15.409836065573767,8.442622950819672,7.2950819672131
BCMb	chr5	NonIntact	PIF_Harbinger_TIR_transposon	17.540983606557372,18.0327868852459,15.901639344262291,2.95081967213115,5.1639344262295035,12.37704918032787,10.819672131147541,13.032786885245905,11.147540983606559,21.147540983606557,15.081967213114758,9.836065573770492,10.819672131147541,18.852459016393443,19.0983606557377,18.934426229508194,14.836065573770496,21.229508196721312,15.737704918032781,23.27868852459017,15.983606557377046,19.098360…
BCMb	chr5	NonIntact	Gypsy_LTR_retrotransposon	13.196721311475413,13.770491803278691,1.393442622950821,15.983606557377046,4.180327868852463,1.393442622950821,15.655737704918028,11.065573770491802,10.491803278688524,8.770491803278686,7.540983606557375,19.754098360655735,19.344262295081965,15.0000000000
BCMb	chr5	NonIntact	Tc1_Mariner_TIR_transposon	20.0,19.262295081967213,12.131147540983608,11.311475409836067,18.606557377049178,17.704918032786882,11.475409836065575,8.278688524590162,16.22950819672131,14.262295081967215,15.409836065573767,22.622950819672134,18.196721311475407,22.459016393442624,17.704918032786882,12.131147540983608,13.442622950819676,16.393442622950815,18.770491803278688,17.786885245901637,12.131147540983608,16.3934426229508…
BCMb	chr6	NonIntact	Mutator_TIR_transposon	14.91803278688525,16.803278688524586,15.245901639344268,18.442622950819672,15.327868852459021,7.868852459016391,8.0327868852459,21.9672131147541,13.442622950819676,20.327868852459016,12.131147540983608,11.639344262295085,23.032786885245905,15.327868852459
BCMb	chr6	NonIntact	Copia_LTR_retrotransposon	9.918032786885245,1.5573770491803294,9.836065573770492,1.5573770491803294,10.0,5.737704918032783,22.37704918032787,10.081967213114753,1.5573770491803294,8.688524590163933,10.98360655737705,10.98360655737705,13.114754098360658,5.737704918032783,22.78688524
BCMb	chr6	NonIntact	helitron	11.065573770491802,12.786885245901642,22.70491803278689,17.540983606557372,11.065573770491802,21.393442622950822,9.01639344262295,18.278688524590162,16.47540983606557,9.508196721311474,20.655737704918035,11.147540983606559,6.5573770491803245,6.31147540983
BCMb	chr6	NonIntact	LTR_retrotransposon	15.245901639344268,3.852459016393446,3.6065573770491834,5.081967213114759,5.245901639344258,4.8360655737704965,5.737704918032783,6.065573770491799,5.245901639344258,15.081967213114758,3.9344262295082,4.9180327868852505,5.245901639344258,4.8360655737704965
BCMb	chr6	NonIntact	hAT_TIR_transposon	11.721311475409838,11.721311475409838,17.786885245901637,16.393442622950815,11.475409836065575,11.475409836065575,17.86885245901639,15.737704918032781,11.475409836065575,7.131147540983603,9.672131147540982,15.901639344262291,10.327868852459018,10.90163934
BCMb	chr6	NonIntact	PIF_Harbinger_TIR_transposon	18.770491803278688,18.770491803278688,7.786885245901637,7.786885245901637,17.45901639344262,15.327868852459021,17.86885245901639,20.737704918032787,14.426229508196725,20.901639344262293,7.868852459016391,8.688524590163933,16.885245901639344,13.032786885245905,15.655737704918028,7.622950819672129,17.540983606557372,14.590163934426233,21.885245901639347,15.819672131147538,12.868852459016395,17.1311…
BCMb	chr6	NonIntact	Gypsy_LTR_retrotransposon	3.524590163934429,5.737704918032783,14.836065573770496,3.524590163934429,5.573770491803274,8.0327868852459,9.508196721311474,5.245901639344258,6.4754098360655705,6.5573770491803245,6.229508196721308,6.967213114754096,12.213114754098363,12.213114754098363,
BCMb	chr6	NonIntact	CACTA_TIR_transposon	18.688524590163933,21.065573770491806,17.704918032786882,21.065573770491806,18.688524590163933,21.065573770491806,4.754098360655742,18.114754098360653,15.737704918032781,12.868852459016395,14.180327868852462,19.672131147540984,15.901639344262291,7.2131147
BCMb	chr6	NonIntact	Tc1_Mariner_TIR_transposon	16.885245901639344,11.147540983606559,9.180327868852459,8.934426229508196,19.01639344262295,16.803278688524586,19.01639344262295,21.885245901639347,19.59016393442623,9.098360655737704,11.967213114754099,21.147540983606557,14.672131147540988,19.42622950819672,10.737704918032788,17.45901639344262,11.639344262295085,14.016393442622954,17.950819672131143,15.983606557377046,11.967213114754099,10.40983…
BCMb	chr7	NonIntact	Mutator_TIR_transposon	2.213114754098363,6.147540983606554,15.655737704918028,11.967213114754099,17.29508196721311,16.885245901639344,23.032786885245905,15.901639344262291,20.163934426229506,17.950819672131143,17.950819672131143,13.196721311475413,24.590163934426233,21.88524590
BCMb	chr7	NonIntact	hAT_TIR_transposon	19.262295081967213,19.01639344262295,5.327868852459011,13.688524590163937,17.21311475409836,4.590163934426233,14.016393442622954,19.01639344262295,23.114754098360656,6.885245901639341,6.803278688524587,20.573770491803277,18.606557377049178,16.393442622950
BCMb	chr7	NonIntact	LTR_retrotransposon	6.967213114754096,20.081967213114755,19.18032786885246,11.065573770491802,11.557377049180328,2.1311475409836085,5.409836065573766,1.475409836065575,19.18032786885246,16.47540983606557,12.37704918032787,18.114754098360653,6.147540983606554,15.1639344262295
BCMb	chr7	NonIntact	helitron	7.213114754098358,18.278688524590162,6.5573770491803245,4.590163934426233,18.278688524590162,17.45901639344262,20.0,19.508196721311474,13.278688524590166,5.000000000000004,6.229508196721308,20.901639344262293,19.18032786885246,17.540983606557372,17.295081
BCMb	chr7	NonIntact	Copia_LTR_retrotransposon	2.377049180327871,2.8688524590163964,5.245901639344258,11.229508196721312,18.688524590163933,16.72131147540983,19.18032786885246,11.475409836065575,4.098360655737708,17.86885245901639,14.344262295081972,15.737704918032781,8.278688524590162,2.3770491803278
BCMb	chr7	NonIntact	Gypsy_LTR_retrotransposon	9.344262295081966,19.672131147540984,21.9672131147541,21.9672131147541,22.459016393442624,21.721311475409834,5.737704918032783,15.327868852459021,2.622950819672133,7.213114754098358,8.852459016393441,18.360655737704917,1.7213114754098378,18.27868852459016
BCMb	chr7	NonIntact	PIF_Harbinger_TIR_transposon	21.9672131147541,19.754098360655735,20.983606557377048,23.36065573770492,12.786885245901642,22.54098360655738,21.229508196721312,15.245901639344268,21.147540983606557,14.754098360655743,15.983606557377046,6.147540983606554,7.9508196721311455,8.60655737704918,9.01639344262295,16.47540983606557,19.01639344262295,13.36065573770492,16.47540983606557,1.9672131147541,14.262295081967215,13.6065573770491…
BCMb	chr7	NonIntact	CACTA_TIR_transposon	16.72131147540983,23.68852459016394,7.704918032786884,16.147540983606554,12.868852459016395,14.262295081967215,6.6393442622950785,16.72131147540983,20.491803278688526,13.114754098360658,10.573770491803279,16.47540983606557,13.278688524590166,10.5737704918
BCMb	chr7	NonIntact	Tc1_Mariner_TIR_transposon	9.672131147540982,18.524590163934423,22.622950819672134,18.360655737704917,14.016393442622954,22.295081967213118,16.967213114754095,11.311475409836067,18.278688524590162,9.836065573770492,19.754098360655735,14.016393442622954,14.016393442622954,10.655737704918032,10.491803278688524,18.278688524590162,15.655737704918028,13.032786885245905,17.540983606557372,21.885245901639347,8.278688524590162,16.…
BCMb	chr8	NonIntact	Mutator_TIR_transposon	2.8688524590163964,3.1967213114754123,12.37704918032787,1.6393442622950833,1.1475409836065582,12.37704918032787,7.459016393442621,5.000000000000004,18.114754098360653,20.491803278688526,8.688524590163933,6.885245901639341,15.245901639344268,10.81967213114
BCMb	chr8	NonIntact	LTR_retrotransposon	7.295081967213112,8.934426229508196,14.098360655737707,18.114754098360653,20.327868852459016,8.0327868852459,11.229508196721312,2.95081967213115,16.72131147540983,11.147540983606559,4.344262295081971,2.377049180327871,16.63934426229508,11.967213114754099,
BCMb	chr8	NonIntact	hAT_TIR_transposon	12.459016393442624,18.688524590163933,9.918032786885245,19.918032786885245,6.065573770491799,4.262295081967217,5.409836065573766,16.557377049180324,11.065573770491802,9.180327868852459,15.163934426229511,12.868852459016395,7.295081967213112,7.950819672131
BCMb	chr8	NonIntact	CACTA_TIR_transposon	10.491803278688524,5.983606557377045,23.19672131147541,13.524590163934429,6.393442622950817,13.688524590163937,7.377049180327866,7.868852459016391,10.245901639344263,10.491803278688524,16.557377049180324,19.59016393442623,9.426229508196721,11.885245901639
BCMb	chr8	NonIntact	helitron	20.327868852459016,16.967213114754095,16.63934426229508,9.01639344262295,17.540983606557372,14.344262295081972,19.42622950819672,17.45901639344262,11.39344262295082,12.868852459016395,12.868852459016395,16.22950819672131,20.163934426229506,5.4918032786885
BCMb	chr8	NonIntact	Copia_LTR_retrotransposon	14.672131147540988,14.344262295081972,14.836065573770496,9.180327868852459,18.852459016393443,17.377049180327866,11.147540983606559,13.196721311475413,8.278688524590162,22.213114754098363,17.1311475409836,10.163934426229508,17.45901639344262,2.62295081967
BCMb	chr8	NonIntact	Gypsy_LTR_retrotransposon	10.163934426229508,9.344262295081966,17.950819672131143,2.95081967213115,9.918032786885245,8.60655737704918,16.22950819672131,5.000000000000004,14.754098360655743,6.5573770491803245,6.229508196721308,6.5573770491803245,7.540983606557375,19.42622950819672,
BCMb	chr8	NonIntact	PIF_Harbinger_TIR_transposon	16.72131147540983,16.885245901639344,16.72131147540983,16.47540983606557,10.245901639344263,18.770491803278688,20.573770491803277,11.065573770491802,23.114754098360656,10.98360655737705,23.60655737704918,22.049180327868854,23.60655737704918,11.639344262295085,18.114754098360653,19.01639344262295,19.754098360655735,20.81967213114754,22.213114754098363,10.0,19.0983606557377,17.1311475409836,10.5737…
BCMb	chr8	NonIntact	Tc1_Mariner_TIR_transposon	9.262295081967212,16.803278688524586,15.983606557377046,13.196721311475413,6.311475409836063,11.885245901639346,13.934426229508201,5.000000000000004,15.49180327868852,19.262295081967213,19.42622950819672,16.22950819672131,16.885245901639344,16.885245901639344,19.0983606557377,18.114754098360653,23.36065573770492,18.0327868852459,16.63934426229508,10.98360655737705,13.36065573770492,12.62295081967…
BCMb	chr9	NonIntact	Mutator_TIR_transposon	4.098360655737708,4.8360655737704965,5.409836065573766,7.213114754098358,21.475409836065577,19.59016393442623,4.9180327868852505,14.344262295081972,21.065573770491806,20.655737704918035,19.01639344262295,18.524590163934423,23.524590163934427,22.5409836065
BCMb	chr9	NonIntact	Gypsy_LTR_retrotransposon	16.63934426229508,7.131147540983603,3.7704918032786923,17.29508196721311,6.967213114754096,8.852459016393441,17.86885245901639,13.770491803278691,13.770491803278691,16.393442622950815,12.049180327868855,17.86885245901639,12.95081967213115,16.3934426229508
BCMb	chr9	NonIntact	CACTA_TIR_transposon	17.04918032786885,19.754098360655735,11.475409836065575,15.49180327868852,20.655737704918035,17.540983606557372,9.180327868852459,16.885245901639344,14.836065573770496,8.114754098360654,18.360655737704917,5.819672131147537,6.5573770491803245,14.0983606557
BCMb	chr9	NonIntact	Copia_LTR_retrotransposon	9.672131147540982,6.4754098360655705,8.60655737704918,13.032786885245905,7.540983606557375,13.032786885245905,2.786885245901642,7.786885245901637,18.442622950819672,16.557377049180324,10.655737704918032,17.786885245901637,14.754098360655743,5.737704918032
BCMb	chr9	NonIntact	hAT_TIR_transposon	10.081967213114753,7.704918032786884,11.80327868852459,10.245901639344263,16.63934426229508,9.426229508196721,2.5409836065573796,20.491803278688526,10.901639344262296,11.229508196721312,5.1639344262295035,10.901639344262296,11.721311475409838,13.934426229
BCMb	chr9	NonIntact	LTR_retrotransposon	7.786885245901637,6.721311475409832,13.524590163934429,14.672131147540988,21.803278688524593,20.983606557377048,7.704918032786884,10.819672131147541,23.442622950819676,14.180327868852462,21.885245901639347,5.737704918032783,3.524590163934429,2.86885245901
BCMb	chr9	NonIntact	helitron	16.967213114754095,12.95081967213115,11.229508196721312,14.836065573770496,19.508196721311474,17.704918032786882,22.049180327868854,0.7377049180327875,17.950819672131143,18.360655737704917,20.901639344262293,15.081967213114758,11.639344262295085,10.245901
BCMb	chr9	NonIntact	PIF_Harbinger_TIR_transposon	17.86885245901639,21.393442622950822,21.639344262295083,18.606557377049178,23.27868852459017,15.49180327868852,18.934426229508194,17.1311475409836,12.131147540983608,7.04918032786885,12.54098360655738,22.78688524590164,21.639344262295083,24.590163934426233,21.721311475409834,13.114754098360658,22.70491803278689,0.6557377049180333,0.16393442622950832,20.81967213114754,3.0327868852459043,12.5409836…
BCMb	chr9	NonIntact	Tc1_Mariner_TIR_transposon	15.901639344262291,10.40983606557377,10.40983606557377,10.40983606557377,9.344262295081966,10.40983606557377,23.852459016393446,15.819672131147538,18.524590163934423,8.196721311475407,20.81967213114754,11.311475409836067,9.508196721311474,8.688524590163933,10.40983606557377,19.01639344262295,12.622950819672134,10.98360655737705,11.885245901639346,8.770491803278686,9.180327868852459,18.85245901639…
BCMb	chrY	NonIntact	Mutator_TIR_transposon	2.622950819672133,5.327868852459011,11.967213114754099,16.393442622950815,18.196721311475407,14.754098360655743,9.426229508196721,11.065573770491802,12.131147540983608,3.7704918032786923,11.311475409836067,20.573770491803277,22.868852459016395,15.16393442
BCMb	chrY	NonIntact	hAT_TIR_transposon	16.31147540983606,11.967213114754099,18.114754098360653,10.901639344262296,22.70491803278689,16.147540983606554,17.786885245901637,10.819672131147541,8.688524590163933,15.000000000000004,16.47540983606557,17.950819672131143,21.803278688524593,12.704918032
BCMb	chrY	NonIntact	LTR_retrotransposon	16.885245901639344,13.524590163934429,22.049180327868854,6.065573770491799,15.655737704918028,7.9508196721311455,5.573770491803274,7.295081967213112,15.081967213114758,12.213114754098363,19.344262295081965,3.688524590163938,9.918032786885245,14.3442622950
BCMb	chrY	NonIntact	helitron	14.754098360655743,17.04918032786885,21.475409836065577,19.508196721311474,8.360655737704915,23.27868852459017,11.967213114754099,16.803278688524586,12.786885245901642,16.393442622950815,19.754098360655735,15.819672131147538,20.655737704918035,17.29508196
BCMb	chrY	NonIntact	CACTA_TIR_transposon	11.39344262295082,17.04918032786885,13.196721311475413,12.459016393442624,21.803278688524593,6.967213114754096,12.37704918032787,19.83606557377049,13.36065573770492,18.524590163934423,10.40983606557377,12.459016393442624,17.04918032786885,11.8852459016393
BCMb	chrY	NonIntact	Copia_LTR_retrotransposon	15.327868852459021,7.540983606557375,5.983606557377045,17.540983606557372,9.344262295081966,10.327868852459018,8.770491803278686,15.983606557377046,3.9344262295082,6.803278688524587,7.704918032786884,16.885245901639344,5.573770491803274,1.5573770491803294
BCMb	chrY	NonIntact	Gypsy_LTR_retrotransposon	16.557377049180324,6.147540983606554,8.524590163934425,17.377049180327866,17.29508196721311,5.983606557377045,16.0655737704918,18.0327868852459,9.836065573770492,6.885245901639341,13.36065573770492,17.29508196721311,2.1311475409836085,19.0983606557377,15.
BCMb	chrY	NonIntact	Tc1_Mariner_TIR_transposon	16.72131147540983,17.62295081967213,20.081967213114755,22.78688524590164,16.63934426229508,16.393442622950815,12.704918032786887,13.606557377049183,15.737704918032781,16.63934426229508,14.098360655737707,23.852459016393446,10.491803278688524,12.459016393442624,19.18032786885246,20.573770491803277,16.22950819672131,18.0327868852459,15.327868852459021,19.18032786885246,9.836065573770492,6.721311475…
BCMb	chrY	NonIntact	PIF_Harbinger_TIR_transposon	21.803278688524593,17.86885245901639,23.852459016393446,5.409836065573766,0.0,22.213114754098363,23.032786885245905,19.0983606557377,14.426229508196725,11.311475409836067,14.590163934426233,20.327868852459016,20.327868852459016,21.147540983606557,7.295081967213112,19.0983606557377,17.786885245901637,21.065573770491806,14.754098360655743,17.21311475409836,15.49180327868852,13.36065573770492,14.180…
BOAXa	chr1	NonIntact	Copia_LTR_retrotransposon	15.901639344262291,9.098360655737704,1.2295081967213126,3.0327868852459043,14.344262295081972,14.344262295081972,9.098360655737704,11.311475409836067,11.065573770491802,11.147540983606559,11.557377049180328,2.1311475409836085,2.786885245901642,5.819672131
BOAXa	chr1	NonIntact	Mutator_TIR_transposon	6.229508196721308,3.9344262295082,9.098360655737704,20.163934426229506,24.50819672131148,18.934426229508194,15.000000000000004,15.081967213114758,17.21311475409836,21.803278688524593,10.0,11.721311475409838,11.80327868852459,11.311475409836067,21.96721311
BOAXa	chr1	NonIntact	hAT_TIR_transposon	12.049180327868855,7.704918032786884,16.22950819672131,1.8032786885245917,10.819672131147541,14.262295081967215,21.639344262295083,16.72131147540983,6.393442622950817,7.04918032786885,8.770491803278686,20.901639344262293,14.590163934426233,10.245901639344
BOAXa	chr1	NonIntact	LTR_retrotransposon	13.36065573770492,8.934426229508196,12.37704918032787,13.36065573770492,8.934426229508196,12.37704918032787,18.688524590163933,8.688524590163933,19.344262295081965,18.114754098360653,8.688524590163933,4.098360655737708,11.721311475409838,4.754098360655742
BOAXa	chr1	NonIntact	helitron	9.426229508196721,13.278688524590166,20.245901639344265,20.081967213114755,17.45901639344262,10.98360655737705,14.836065573770496,9.836065573770492,3.360655737704921,19.262295081967213,11.39344262295082,17.540983606557372,11.311475409836067,19.18032786885
BOAXa	chr1	NonIntact	Gypsy_LTR_retrotransposon	22.70491803278689,5.573770491803274,5.1639344262295035,2.7049180327868876,5.901639344262291,0.491803278688525,0.32786885245901665,8.278688524590162,7.622950819672129,5.737704918032783,7.213114754098358,11.39344262295082,1.7213114754098378,21.3114754098360
BOAXa	chr1	NonIntact	CACTA_TIR_transposon	10.819672131147541,21.147540983606557,15.901639344262291,15.163934426229511,18.114754098360653,10.819672131147541,13.032786885245905,11.475409836065575,7.540983606557375,17.62295081967213,16.31147540983606,17.540983606557372,16.31147540983606,24.590163934
BOAXa	chr1	NonIntact	PIF_Harbinger_TIR_transposon	21.229508196721312,9.262295081967212,12.622950819672134,4.262295081967217,13.688524590163937,14.016393442622954,13.852459016393446,15.081967213114758,20.081967213114755,13.934426229508201,14.016393442622954,16.72131147540983,6.393442622950817,16.885245901
BOAXa	chr1	NonIntact	Tc1_Mariner_TIR_transposon	13.770491803278691,14.180327868852462,19.344262295081965,18.196721311475407,16.0655737704918,14.836065573770496,22.213114754098363,22.295081967213118,14.262295081967215,20.163934426229506,23.36065573770492,16.885245901639344,19.508196721311474,18.360655737704917,19.672131147540984,17.29508196721311,18.524590163934423,17.540983606557372,22.213114754098363,17.377049180327866,21.147540983606557,13.7…
BOAXa	chr2	NonIntact	Mutator_TIR_transposon	3.360655737704921,2.95081967213115,4.262295081967217,2.95081967213115,4.098360655737708,5.655737704918029,4.50819672131148,3.360655737704921,3.852459016393446,2.95081967213115,3.6065573770491834,2.7049180327868876,4.262295081967217,2.95081967213115,3.8524
BOAXa	chr2	NonIntact	LTR_retrotransposon	11.229508196721312,12.786885245901642,19.672131147540984,18.442622950819672,18.770491803278688,10.081967213114753,17.786885245901637,19.754098360655735,15.901639344262291,6.147540983606554,6.065573770491799,7.540983606557375,3.524590163934429,17.540983606
BOAXa	chr2	NonIntact	Copia_LTR_retrotransposon	11.065573770491802,7.459016393442621,4.672131147540988,5.49180327868852,9.59016393442623,14.016393442622954,12.95081967213115,21.229508196721312,4.8360655737704965,12.37704918032787,5.409836065573766,24.262295081967217,21.803278688524593,14.83606557377049
BOAXa	chr2	NonIntact	hAT_TIR_transposon	12.295081967213116,15.49180327868852,12.295081967213116,14.590163934426233,11.229508196721312,21.639344262295083,12.704918032786887,22.131147540983605,21.229508196721312,13.852459016393446,16.885245901639344,14.590163934426233,18.524590163934423,15.245901
BOAXa	chr2	NonIntact	helitron	19.18032786885246,12.95081967213115,17.786885245901637,12.868852459016395,13.852459016393446,22.213114754098363,19.0983606557377,9.918032786885245,15.655737704918028,22.295081967213118,20.655737704918035,4.590163934426233,5.983606557377045,18.524590163934
BOAXa	chr2	NonIntact	Gypsy_LTR_retrotransposon	17.62295081967213,21.885245901639347,12.786885245901642,10.737704918032788,7.459016393442621,5.573770491803274,7.622950819672129,1.393442622950821,6.229508196721308,13.688524590163937,16.393442622950815,6.967213114754096,20.573770491803277,14.672131147540
BOAXa	chr2	NonIntact	CACTA_TIR_transposon	23.114754098360656,16.967213114754095,10.081967213114753,14.590163934426233,11.557377049180328,24.09836065573771,24.09836065573771,22.213114754098363,13.032786885245905,20.40983606557377,10.0,8.442622950819672,11.967213114754099,18.934426229508194,11.4754
BOAXa	chr2	NonIntact	PIF_Harbinger_TIR_transposon	11.147540983606559,16.803278688524586,16.803278688524586,16.557377049180324,11.39344262295082,4.754098360655742,11.39344262295082,4.098360655737708,14.672131147540988,18.934426229508194,5.655737704918029,11.721311475409838,9.836065573770492,23.27868852459
BOAXa	chr2	NonIntact	Tc1_Mariner_TIR_transposon	10.737704918032788,10.737704918032788,14.590163934426233,18.934426229508194,17.29508196721311,19.754098360655735,19.18032786885246,19.344262295081965,19.508196721311474,15.573770491803273,16.967213114754095,13.196721311475413,15.819672131147538,17.86885245901639,17.950819672131143,24.09836065573771,14.180327868852462,14.016393442622954,15.901639344262291,18.770491803278688,14.91803278688525,15.81…
BOAXa	chr3	NonIntact	Mutator_TIR_transposon	9.180327868852459,9.098360655737704,9.426229508196721,14.016393442622954,22.78688524590164,23.60655737704918,12.95081967213115,18.196721311475407,17.704918032786882,21.475409836065577,14.91803278688525,19.59016393442623,9.098360655737704,14.59016393442623
BOAXa	chr3	NonIntact	Gypsy_LTR_retrotransposon	8.360655737704915,11.639344262295085,6.803278688524587,15.081967213114758,12.622950819672134,3.6065573770491834,8.114754098360654,12.95081967213115,21.557377049180328,6.229508196721308,21.885245901639347,8.114754098360654,17.786885245901637,23.68852459016
BOAXa	chr3	NonIntact	hAT_TIR_transposon	11.721311475409838,9.672131147540982,9.836065573770492,12.786885245901642,17.29508196721311,13.688524590163937,9.180327868852459,12.786885245901642,14.672131147540988,21.639344262295083,18.114754098360653,18.770491803278688,22.049180327868854,17.131147540
BOAXa	chr3	NonIntact	helitron	13.934426229508201,16.72131147540983,23.852459016393446,18.934426229508194,14.836065573770496,22.049180327868854,20.737704918032787,4.8360655737704965,5.1639344262295035,18.360655737704917,20.655737704918035,14.426229508196725,17.786885245901637,16.311475
BOAXa	chr3	NonIntact	Copia_LTR_retrotransposon	18.360655737704917,18.196721311475407,18.278688524590162,16.0655737704918,20.0,16.557377049180324,11.475409836065575,5.245901639344258,2.95081967213115,19.918032786885245,8.934426229508196,11.229508196721312,14.098360655737707,14.836065573770496,14.918032
BOAXa	chr3	NonIntact	CACTA_TIR_transposon	20.327868852459016,16.885245901639344,15.000000000000004,24.590163934426233,11.311475409836067,15.081967213114758,21.721311475409834,20.163934426229506,24.50819672131148,20.901639344262293,15.245901639344268,17.704918032786882,16.31147540983606,20.2459016
BOAXa	chr3	NonIntact	LTR_retrotransposon	17.950819672131143,2.7049180327868876,0.7377049180327875,11.639344262295085,2.1311475409836085,5.327868852459011,17.704918032786882,8.688524590163933,8.442622950819672,10.98360655737705,13.196721311475413,3.4426229508196755,8.934426229508196,12.5409836065
BOAXa	chr3	NonIntact	Tc1_Mariner_TIR_transposon	15.573770491803273,12.786885245901642,10.327868852459018,12.95081967213115,17.86885245901639,12.295081967213116,15.409836065573767,13.36065573770492,15.49180327868852,22.622950819672134,21.803278688524593,20.737704918032787,18.114754098360653,15.081967213114758,17.29508196721311,16.47540983606557,21.147540983606557,20.081967213114755,14.672131147540988,17.21311475409836,11.475409836065575,16.9672…
BOAXa	chr3	NonIntact	PIF_Harbinger_TIR_transposon	19.508196721311474,21.639344262295083,12.95081967213115,12.868852459016395,20.655737704918035,11.80327868852459,16.393442622950815,21.311475409836063,19.344262295081965,15.409836065573767,16.393442622950815,11.721311475409838,12.295081967213116,5.49180327
BOAXa	chr4	NonIntact	Mutator_TIR_transposon	3.4426229508196755,3.360655737704921,2.4590163934426252,3.1147540983606588,17.21311475409836,20.40983606557377,18.114754098360653,15.081967213114758,13.770491803278691,11.639344262295085,19.59016393442623,12.622950819672134,19.0983606557377,9.672131147540
BOAXa	chr4	NonIntact	LTR_retrotransposon	14.590163934426233,9.59016393442623,12.131147540983608,12.295081967213116,17.704918032786882,5.737704918032783,7.622950819672129,5.737704918032783,5.327868852459011,1.9672131147541,3.688524590163938,3.4426229508196755,6.6393442622950785,6.393442622950817,
BOAXa	chr4	NonIntact	helitron	16.0655737704918,6.393442622950817,3.524590163934429,4.344262295081971,5.655737704918029,12.131147540983608,17.45901639344262,16.47540983606557,13.606557377049183,22.131147540983605,19.42622950819672,9.180327868852459,10.163934426229508,15.000000000000004
BOAXa	chr4	NonIntact	Gypsy_LTR_retrotransposon	14.590163934426233,3.4426229508196755,4.344262295081971,4.426229508196726,3.524590163934429,5.000000000000004,6.885245901639341,6.885245901639341,5.49180327868852,15.737704918032781,3.7704918032786923,5.000000000000004,10.655737704918032,19.83606557377049
BOAXa	chr4	NonIntact	Copia_LTR_retrotransposon	6.721311475409832,3.6065573770491834,4.50819672131148,3.2786885245901667,11.967213114754099,10.573770491803279,23.032786885245905,8.934426229508196,18.606557377049178,13.114754098360658,14.016393442622954,16.72131147540983,15.327868852459021,13.0327868852
BOAXa	chr4	NonIntact	CACTA_TIR_transposon	21.229508196721312,21.885245901639347,21.147540983606557,19.18032786885246,16.557377049180324,9.918032786885245,13.688524590163937,14.098360655737707,21.393442622950822,16.147540983606554,17.950819672131143,21.065573770491806,7.868852459016391,14.34426229
BOAXa	chr4	NonIntact	hAT_TIR_transposon	15.163934426229511,14.262295081967215,5.1639344262295035,10.737704918032788,10.737704918032788,16.0655737704918,14.016393442622954,18.442622950819672,15.901639344262291,17.62295081967213,10.081967213114753,11.065573770491802,13.688524590163937,13.68852459
BOAXa	chr4	NonIntact	PIF_Harbinger_TIR_transposon	15.000000000000004,16.0655737704918,12.95081967213115,11.639344262295085,6.721311475409832,9.262295081967212,22.459016393442624,16.885245901639344,6.967213114754096,5.49180327868852,14.836065573770496,19.672131147540984,17.04918032786885,16.803278688524586,13.114754098360658,18.360655737704917,8.852459016393441,5.573770491803274,18.0327868852459,11.147540983606559,19.262295081967213,24.2622950819…
BOAXa	chr4	NonIntact	Tc1_Mariner_TIR_transposon	21.065573770491806,18.196721311475407,15.573770491803273,13.524590163934429,12.95081967213115,17.04918032786885,13.278688524590166,10.737704918032788,19.508196721311474,20.245901639344265,21.557377049180328,20.327868852459016,23.36065573770492,20.0,20.0,22.049180327868854,18.606557377049178,13.688524590163937,20.491803278688526,10.901639344262296,20.0,18.360655737704917,18.688524590163933,15.5737…
BOAXa	chr5	NonIntact	Mutator_TIR_transposon	6.4754098360655705,7.04918032786885,5.655737704918029,6.147540983606554,6.5573770491803245,5.655737704918029,6.5573770491803245,5.409836065573766,7.213114754098358,7.04918032786885,5.000000000000004,5.245901639344258,6.5573770491803245,4.50819672131148,5.
BOAXa	chr5	NonIntact	LTR_retrotransposon	7.704918032786884,8.770491803278686,10.163934426229508,21.065573770491806,15.245901639344268,12.213114754098363,17.704918032786882,15.49180327868852,19.918032786885245,21.065573770491806,6.6393442622950785,7.131147540983603,19.0983606557377,14.59016393442
BOAXa	chr5	NonIntact	helitron	15.901639344262291,12.704918032786887,9.754098360655737,16.393442622950815,10.573770491803279,20.245901639344265,6.721311475409832,7.377049180327866,14.590163934426233,4.8360655737704965,5.737704918032783,10.98360655737705,16.557377049180324,1.14754098360
BOAXa	chr5	NonIntact	CACTA_TIR_transposon	6.967213114754096,12.95081967213115,20.491803278688526,20.983606557377048,12.459016393442624,21.065573770491806,21.9672131147541,12.54098360655738,9.344262295081966,17.04918032786885,4.754098360655742,9.754098360655737,14.016393442622954,12.29508196721311
BOAXa	chr5	NonIntact	Copia_LTR_retrotransposon	10.163934426229508,14.098360655737707,17.950819672131143,21.065573770491806,16.72131147540983,5.1639344262295035,15.327868852459021,12.95081967213115,2.8688524590163964,18.0327868852459,22.37704918032787,6.065573770491799,23.27868852459017,21.311475409836
BOAXa	chr5	NonIntact	Gypsy_LTR_retrotransposon	2.95081967213115,6.229508196721308,0.0,12.54098360655738,11.39344262295082,10.0,23.032786885245905,8.60655737704918,14.590163934426233,7.704918032786884,5.000000000000004,5.983606557377045,11.721311475409838,17.1311475409836,11.311475409836067,8.934426229
BOAXa	chr5	NonIntact	hAT_TIR_transposon	14.590163934426233,23.27868852459017,23.60655737704918,13.770491803278691,19.672131147540984,10.573770491803279,17.29508196721311,14.91803278688525,6.885245901639341,11.39344262295082,17.1311475409836,14.50819672131148,20.81967213114754,10.081967213114753
BOAXa	chr5	NonIntact	Tc1_Mariner_TIR_transposon	13.688524590163937,21.393442622950822,19.59016393442623,23.114754098360656,17.704918032786882,20.163934426229506,15.573770491803273,23.27868852459017,19.754098360655735,18.442622950819672,14.098360655737707,22.868852459016395,12.459016393442624,17.704918032786882,23.19672131147541,16.393442622950815,13.606557377049183,11.639344262295085,14.262295081967215,17.377049180327866,16.803278688524586,19.…
BOAXa	chr5	NonIntact	PIF_Harbinger_TIR_transposon	10.491803278688524,17.21311475409836,11.475409836065575,15.000000000000004,17.540983606557372,6.147540983606554,13.688524590163937,5.983606557377045,14.180327868852462,19.754098360655735,13.114754098360658,20.737704918032787,13.196721311475413,20.65573770
BOAXa	chr6	NonIntact	Mutator_TIR_transposon	4.426229508196726,3.852459016393446,3.6065573770491834,3.1967213114754123,4.098360655737708,2.95081967213115,2.2950819672131164,3.360655737704921,4.50819672131148,2.95081967213115,2.95081967213115,2.7049180327868876,2.95081967213115,2.95081967213115,3.196
BOAXa	chr6	NonIntact	CACTA_TIR_transposon	20.901639344262293,15.655737704918028,7.868852459016391,10.245901639344263,17.29508196721311,12.786885245901642,10.163934426229508,17.786885245901637,8.524590163934425,22.295081967213118,16.47540983606557,13.606557377049183,18.360655737704917,12.622950819
BOAXa	chr6	NonIntact	Copia_LTR_retrotransposon	12.049180327868855,13.36065573770492,11.885245901639346,17.950819672131143,17.786885245901637,23.934426229508198,21.147540983606557,20.081967213114755,17.86885245901639,17.45901639344262,5.737704918032783,5.655737704918029,4.50819672131148,5.0000000000000
BOAXa	chr6	NonIntact	hAT_TIR_transposon	13.934426229508201,8.442622950819672,16.72131147540983,16.885245901639344,15.245901639344268,10.573770491803279,14.016393442622954,8.934426229508196,4.262295081967217,4.262295081967217,4.180327868852463,13.770491803278691,19.0983606557377,13.7704918032786
BOAXa	chr6	NonIntact	PIF_Harbinger_TIR_transposon	20.163934426229506,15.000000000000004,22.868852459016395,12.131147540983608,9.426229508196721,15.000000000000004,13.442622950819676,23.442622950819676,10.573770491803279,13.196721311475413,13.688524590163937,14.91803278688525,13.606557377049183,16.72131147540983,22.54098360655738,15.901639344262291,10.081967213114753,20.40983606557377,3.0327868852459043,1.9672131147541,1.7213114754098378,3.196721…
BOAXa	chr6	NonIntact	LTR_retrotransposon	9.508196721311474,12.37704918032787,12.704918032786887,9.098360655737704,15.245901639344268,20.081967213114755,22.868852459016395,5.983606557377045,7.213114754098358,14.426229508196725,6.5573770491803245,15.000000000000004,21.147540983606557,20.3278688524
BOAXa	chr6	NonIntact	Gypsy_LTR_retrotransposon	22.868852459016395,13.934426229508201,2.786885245901642,9.098360655737704,10.163934426229508,11.80327868852459,13.606557377049183,18.934426229508194,12.213114754098363,8.442622950819672,13.032786885245905,19.672131147540984,14.180327868852462,17.540983606
BOAXa	chr6	NonIntact	Tc1_Mariner_TIR_transposon	12.213114754098363,7.377049180327866,22.54098360655738,13.934426229508201,15.409836065573767,13.770491803278691,21.393442622950822,14.590163934426233,19.754098360655735,12.459016393442624,16.47540983606557,19.672131147540984,13.770491803278691,24.09836065573771,10.163934426229508,15.327868852459021,17.377049180327866,14.180327868852462,11.39344262295082,17.704918032786882,19.42622950819672,19.016…
BOAXa	chr6	NonIntact	helitron	23.36065573770492,21.393442622950822,19.59016393442623,10.081967213114753,13.442622950819676,17.950819672131143,18.852459016393443,14.426229508196725,16.557377049180324,13.688524590163937,11.80327868852459,12.868852459016395,17.86885245901639,17.295081967
BOAXa	chr7	NonIntact	Mutator_TIR_transposon	3.1967213114754123,3.6065573770491834,3.6065573770491834,2.95081967213115,4.098360655737708,3.1967213114754123,4.50819672131148,3.6065573770491834,3.852459016393446,3.852459016393446,3.4426229508196755,4.50819672131148,4.098360655737708,3.852459016393446,
BOAXa	chr7	NonIntact	Gypsy_LTR_retrotransposon	21.475409836065577,16.967213114754095,11.065573770491802,17.86885245901639,9.180327868852459,9.098360655737704,5.327868852459011,4.180327868852463,10.573770491803279,23.68852459016394,17.540983606557372,11.885245901639346,22.622950819672134,7.213114754098
BOAXa	chr7	NonIntact	hAT_TIR_transposon	14.098360655737707,14.098360655737707,5.1639344262295035,2.8688524590163964,6.967213114754096,13.442622950819676,9.918032786885245,8.278688524590162,15.983606557377046,21.393442622950822,5.655737704918029,3.852459016393446,11.39344262295082,6.803278688524
BOAXa	chr7	NonIntact	Tc1_Mariner_TIR_transposon	15.737704918032781,19.42622950819672,13.770491803278691,17.377049180327866,16.803278688524586,17.21311475409836,23.27868852459017,18.606557377049178,20.983606557377048,17.29508196721311,23.36065573770492,15.983606557377046,16.0655737704918,12.868852459016395,15.245901639344268,12.049180327868855,13.934426229508201,20.573770491803277,11.721311475409838,20.81967213114754,18.606557377049178,16.47540…
BOAXa	chr7	NonIntact	helitron	11.885245901639346,15.655737704918028,8.934426229508196,23.77049180327869,11.80327868852459,19.18032786885246,18.442622950819672,17.21311475409836,1.0655737704918042,18.114754098360653,8.524590163934425,7.540983606557375,3.2786885245901667,10.491803278688
BOAXa	chr7	NonIntact	Copia_LTR_retrotransposon	19.18032786885246,18.196721311475407,6.5573770491803245,17.21311475409836,19.0983606557377,16.47540983606557,19.508196721311474,18.770491803278688,16.72131147540983,17.786885245901637,18.196721311475407,9.672131147540982,9.918032786885245,10.8196721311475
BOAXa	chr7	NonIntact	LTR_retrotransposon	6.721311475409832,8.442622950819672,8.688524590163933,8.442622950819672,8.0327868852459,9.180327868852459,9.918032786885245,7.868852459016391,20.901639344262293,12.622950819672134,18.524590163934423,17.04918032786885,17.21311475409836,6.4754098360655705,1
BOAXa	chr7	NonIntact	CACTA_TIR_transposon	16.31147540983606,17.786885245901637,17.62295081967213,23.114754098360656,15.737704918032781,11.229508196721312,10.163934426229508,18.524590163934423,9.01639344262295,8.524590163934425,22.70491803278689,14.50819672131148,20.163934426229506,12.213114754098
BOAXa	chr7	NonIntact	PIF_Harbinger_TIR_transposon	21.721311475409834,23.68852459016394,15.655737704918028,14.344262295081972,18.606557377049178,14.672131147540988,7.295081967213112,9.754098360655737,13.852459016393446,20.655737704918035,19.344262295081965,9.59016393442623,16.47540983606557,13.27868852459
BOAXa	chr8	NonIntact	Mutator_TIR_transposon	13.606557377049183,19.59016393442623,16.393442622950815,20.901639344262293,7.622950819672129,5.737704918032783,24.590163934426233,10.245901639344263,9.262295081967212,10.0,22.37704918032787,15.49180327868852,15.737704918032781,9.426229508196721,15.7377049
BOAXa	chr8	NonIntact	helitron	13.278688524590166,11.311475409836067,4.344262295081971,5.081967213114759,4.590163934426233,2.4590163934426252,18.524590163934423,17.377049180327866,5.737704918032783,3.1967213114754123,13.852459016393446,23.852459016393446,5.983606557377045,23.1967213114
BOAXa	chr8	NonIntact	hAT_TIR_transposon	19.262295081967213,11.557377049180328,8.770491803278686,9.59016393442623,11.721311475409838,11.967213114754099,11.721311475409838,10.737704918032788,11.967213114754099,12.704918032786887,6.311475409836063,10.491803278688524,20.163934426229506,10.245901639
BOAXa	chr8	NonIntact	LTR_retrotransposon	16.31147540983606,5.409836065573766,17.786885245901637,24.426229508196727,24.426229508196727,10.163934426229508,6.803278688524587,9.672131147540982,14.754098360655743,0.8196721311475417,6.885245901639341,4.344262295081971,4.426229508196726,2.1311475409836
BOAXa	chr8	NonIntact	Copia_LTR_retrotransposon	12.459016393442624,22.459016393442624,8.852459016393441,13.196721311475413,13.196721311475413,15.409836065573767,14.098360655737707,6.5573770491803245,6.5573770491803245,13.278688524590166,5.901639344262291,14.262295081967215,14.262295081967215,5.90163934
BOAXa	chr8	NonIntact	PIF_Harbinger_TIR_transposon	15.737704918032781,11.39344262295082,12.622950819672134,24.180327868852462,7.295081967213112,10.655737704918032,14.262295081967215,7.9508196721311455,7.377049180327866,12.459016393442624,17.1311475409836,16.31147540983606,11.885245901639346,16.557377049180324,2.4590163934426252,4.016393442622954,2.377049180327871,2.8688524590163964,22.459016393442624,20.901639344262293,23.27868852459017,22.131147…
BOAXa	chr8	NonIntact	Gypsy_LTR_retrotransposon	19.42622950819672,16.557377049180324,13.442622950819676,22.459016393442624,19.0983606557377,20.983606557377048,6.147540983606554,3.6065573770491834,8.278688524590162,2.786885245901642,11.065573770491802,2.4590163934426252,8.278688524590162,5.0819672131147
BOAXa	chr8	NonIntact	CACTA_TIR_transposon	24.262295081967217,12.131147540983608,11.475409836065575,12.95081967213115,13.442622950819676,8.934426229508196,11.885245901639346,10.573770491803279,9.836065573770492,13.852459016393446,24.426229508196727,11.721311475409838,18.114754098360653,17.95081967
BOAXa	chr8	NonIntact	Tc1_Mariner_TIR_transposon	15.409836065573767,24.016393442622952,17.86885245901639,20.737704918032787,17.786885245901637,15.655737704918028,21.229508196721312,17.04918032786885,14.836065573770496,23.60655737704918,13.688524590163937,20.655737704918035,21.475409836065577,14.754098360655743,16.72131147540983,19.754098360655735,23.60655737704918,17.704918032786882,23.68852459016394,15.983606557377046,22.95081967213115,15.1639…
BOAXa	chr9	NonIntact	Mutator_TIR_transposon	2.5409836065573796,2.7049180327868876,2.7049180327868876,2.4590163934426252,3.852459016393446,2.95081967213115,2.7049180327868876,2.95081967213115,2.049180327868854,2.2950819672131164,2.4590163934426252,3.6065573770491834,2.95081967213115,3.60655737704918
BOAXa	chr9	NonIntact	LTR_retrotransposon	17.377049180327866,16.0655737704918,1.8852459016393461,16.803278688524586,1.8032786885245917,11.967213114754099,1.8852459016393461,11.639344262295085,8.0327868852459,13.36065573770492,13.770491803278691,8.442622950819672,13.934426229508201,15.081967213114
BOAXa	chr9	NonIntact	Gypsy_LTR_retrotransposon	16.31147540983606,13.442622950819676,5.655737704918029,4.180327868852463,4.9180327868852505,5.245901639344258,6.229508196721308,3.7704918032786923,6.229508196721308,15.081967213114758,6.967213114754096,11.229508196721312,7.540983606557375,16.5573770491803
BOAXa	chr9	NonIntact	helitron	14.91803278688525,2.4590163934426252,8.0327868852459,8.770491803278686,5.49180327868852,14.672131147540988,5.737704918032783,4.344262295081971,7.131147540983603,6.229508196721308,5.1639344262295035,7.377049180327866,14.262295081967215,5.1639344262295035,2
BOAXa	chr9	NonIntact	Tc1_Mariner_TIR_transposon	17.950819672131143,14.262295081967215,24.180327868852462,16.967213114754095,15.819672131147538,18.524590163934423,17.704918032786882,13.606557377049183,13.36065573770492,17.45901639344262,14.262295081967215,20.163934426229506,22.459016393442624,19.0983606557377,16.22950819672131,18.196721311475407,21.311475409836063,15.327868852459021,18.442622950819672,11.557377049180328,16.22950819672131,19.672…
BOAXa	chr9	NonIntact	CACTA_TIR_transposon	15.49180327868852,15.081967213114758,8.524590163934425,9.01639344262295,23.60655737704918,20.491803278688526,20.491803278688526,16.0655737704918,20.737704918032787,16.967213114754095,13.032786885245905,17.1311475409836,23.114754098360656,21.72131147540983
BOAXa	chr9	NonIntact	Copia_LTR_retrotransposon	12.213114754098363,15.819672131147538,17.21311475409836,16.72131147540983,19.01639344262295,17.86885245901639,14.754098360655743,5.573770491803274,16.0655737704918,5.901639344262291,19.344262295081965,3.524590163934429,15.655737704918028,5.163934426229503
BOAXa	chr9	NonIntact	PIF_Harbinger_TIR_transposon	12.295081967213116,10.40983606557377,13.196721311475413,12.868852459016395,23.60655737704918,23.114754098360656,6.803278688524587,19.508196721311474,16.0655737704918,8.0327868852459,5.1639344262295035,18.688524590163933,12.95081967213115,10.655737704918032,21.885245901639347,12.213114754098363,21.393442622950822,11.557377049180328,16.147540983606554,17.1311475409836,4.9180327868852505,14.26229508…
BOAXa	chr9	NonIntact	hAT_TIR_transposon	9.426229508196721,19.59016393442623,9.098360655737704,16.63934426229508,24.426229508196727,18.442622950819672,11.80327868852459,21.803278688524593,14.590163934426233,23.27868852459017,12.37704918032787,14.590163934426233,20.0,19.0983606557377,18.770491803
BOAXa	chrX	NonIntact	Mutator_TIR_transposon	2.4590163934426252,4.098360655737708,3.852459016393446,3.1967213114754123,3.852459016393446,2.95081967213115,4.098360655737708,2.7049180327868876,2.2950819672131164,3.6065573770491834,4.50819672131148,3.6065573770491834,4.50819672131148,4.098360655737708,
BOAXa	chrX	NonIntact	Copia_LTR_retrotransposon	7.9508196721311455,8.360655737704915,7.704918032786884,14.426229508196725,13.196721311475413,12.459016393442624,9.262295081967212,11.639344262295085,9.918032786885245,10.737704918032788,10.573770491803279,11.639344262295085,13.770491803278691,12.131147540
BOAXa	chrX	NonIntact	CACTA_TIR_transposon	15.081967213114758,18.934426229508194,22.131147540983605,9.180327868852459,19.0983606557377,17.704918032786882,20.40983606557377,16.557377049180324,10.819672131147541,8.0327868852459,16.31147540983606,15.409836065573767,20.491803278688526,10.6557377049180
BOAXa	chrX	NonIntact	Gypsy_LTR_retrotransposon	12.295081967213116,16.885245901639344,10.491803278688524,18.524590163934423,9.098360655737704,16.0655737704918,17.21311475409836,18.934426229508194,18.524590163934423,21.393442622950822,22.295081967213118,13.278688524590166,12.95081967213115,18.9344262295
BOAXa	chrX	NonIntact	LTR_retrotransposon	13.442622950819676,11.639344262295085,10.327868852459018,3.2786885245901667,9.01639344262295,9.344262295081966,12.622950819672134,2.213114754098363,8.770491803278686,9.262295081967212,4.590163934426233,14.016393442622954,16.31147540983606,7.54098360655737
BOAXa	chrX	NonIntact	helitron	19.262295081967213,17.950819672131143,14.50819672131148,8.0327868852459,6.967213114754096,13.770491803278691,10.40983606557377,5.573770491803274,15.901639344262291,7.459016393442621,4.590163934426233,15.000000000000004,19.508196721311474,20.16393442622950
BOAXa	chrX	NonIntact	PIF_Harbinger_TIR_transposon	3.688524590163938,13.196721311475413,17.786885245901637,19.83606557377049,13.934426229508201,8.852459016393441,22.459016393442624,22.131147540983605,15.655737704918028,21.639344262295083,17.540983606557372,23.114754098360656,16.0655737704918,17.2131147540
BOAXa	chrX	NonIntact	hAT_TIR_transposon	12.049180327868855,15.49180327868852,16.72131147540983,9.344262295081966,9.180327868852459,11.39344262295082,14.672131147540988,21.229508196721312,8.360655737704915,8.278688524590162,11.885245901639346,9.01639344262295,20.573770491803277,22.78688524590164
BOAXa	chrX	NonIntact	Tc1_Mariner_TIR_transposon	17.950819672131143,17.950819672131143,20.655737704918035,19.672131147540984,23.442622950819676,20.0,17.786885245901637,9.508196721311474,19.344262295081965,17.950819672131143,14.754098360655743,17.377049180327866,18.688524590163933,22.459016393442624,16.803278688524586,23.68852459016394,18.0327868852459,22.37704918032787,14.426229508196725,12.704918032786887,23.524590163934427,22.049180327868854,…
BOAXb	chr1	NonIntact	LTR_retrotransposon	14.180327868852462,15.983606557377046,14.262295081967215,8.688524590163933,12.54098360655738,9.754098360655737,8.524590163934425,19.344262295081965,2.622950819672133,8.442622950819672,21.065573770491806,4.180327868852463,3.852459016393446,11.1475409836065
BOAXb	chr1	NonIntact	Copia_LTR_retrotransposon	10.245901639344263,17.29508196721311,4.098360655737708,8.60655737704918,5.573770491803274,9.180327868852459,11.065573770491802,19.344262295081965,17.786885245901637,24.50819672131148,1.6393442622950833,8.934426229508196,5.327868852459011,17.86885245901639
BOAXb	chr1	NonIntact	helitron	21.147540983606557,13.606557377049183,9.59016393442623,19.754098360655735,20.983606557377048,15.737704918032781,16.72131147540983,11.147540983606559,9.754098360655737,11.967213114754099,8.0327868852459,8.934426229508196,18.524590163934423,14.0983606557377
BOAXb	chr1	NonIntact	CACTA_TIR_transposon	15.081967213114758,17.04918032786885,6.803278688524587,15.409836065573767,15.409836065573767,17.1311475409836,15.49180327868852,10.573770491803279,16.885245901639344,7.213114754098358,20.0,18.196721311475407,19.18032786885246,15.081967213114758,14.0983606
BOAXb	chr1	NonIntact	hAT_TIR_transposon	23.68852459016394,17.540983606557372,9.672131147540982,10.081967213114753,14.91803278688525,17.377049180327866,21.065573770491806,17.62295081967213,14.262295081967215,22.213114754098363,5.737704918032783,3.9344262295082,13.770491803278691,22.3770491803278
BOAXb	chr1	NonIntact	Gypsy_LTR_retrotransposon	22.70491803278689,5.819672131147537,9.508196721311474,5.327868852459011,6.5573770491803245,22.295081967213118,10.163934426229508,3.6065573770491834,8.442622950819672,8.196721311475407,5.737704918032783,16.393442622950815,20.737704918032787,7.3770491803278
BOAXb	chr1	NonIntact	Mutator_TIR_transposon	7.459016393442621,17.704918032786882,14.91803278688525,13.934426229508201,17.62295081967213,21.803278688524593,24.50819672131148,19.59016393442623,17.29508196721311,19.754098360655735,16.0655737704918,21.639344262295083,15.49180327868852,22.04918032786885
BOAXb	chr1	NonIntact	PIF_Harbinger_TIR_transposon	5.49180327868852,5.819672131147537,13.688524590163937,14.426229508196725,19.18032786885246,12.37704918032787,15.49180327868852,7.9508196721311455,11.147540983606559,10.327868852459018,8.114754098360654,3.688524590163938,21.065573770491806,12.6229508196721
BOAXb	chr1	NonIntact	Tc1_Mariner_TIR_transposon	13.606557377049183,17.540983606557372,14.672131147540988,14.180327868852462,6.721311475409832,17.377049180327866,14.426229508196725,13.934426229508201,13.278688524590166,6.803278688524587,12.868852459016395,15.081967213114758,18.360655737704917,13.36065573770492,9.180327868852459,18.606557377049178,24.09836065573771,12.459016393442624,9.01639344262295,8.60655737704918,11.557377049180328,13.032786…
BOAXb	chr2	NonIntact	Mutator_TIR_transposon	5.327868852459011,13.524590163934429,5.409836065573766,14.91803278688525,6.147540983606554,14.426229508196725,3.1147540983606588,20.573770491803277,22.37704918032787,10.98360655737705,8.770491803278686,21.9672131147541,23.934426229508198,15.65573770491802
BOAXb	chr2	NonIntact	CACTA_TIR_transposon	15.901639344262291,10.245901639344263,14.672131147540988,20.163934426229506,14.262295081967215,21.721311475409834,11.80327868852459,19.262295081967213,10.081967213114753,9.672131147540982,11.80327868852459,16.147540983606554,22.049180327868854,21.14754098
BOAXb	chr2	NonIntact	Copia_LTR_retrotransposon	17.704918032786882,17.540983606557372,13.196721311475413,17.540983606557372,16.72131147540983,5.1639344262295035,2.622950819672133,4.016393442622954,5.081967213114759,12.622950819672134,10.573770491803279,7.459016393442621,12.868852459016395,0.32786885245
BOAXb	chr2	NonIntact	PIF_Harbinger_TIR_transposon	13.114754098360658,6.803278688524587,9.01639344262295,17.950819672131143,17.540983606557372,7.377049180327866,14.016393442622954,7.540983606557375,15.901639344262291,8.770491803278686,7.9508196721311455,12.95081967213115,20.81967213114754,13.5245901639344
BOAXb	chr2	NonIntact	LTR_retrotransposon	14.262295081967215,8.934426229508196,15.327868852459021,12.131147540983608,16.63934426229508,17.45901639344262,2.8688524590163964,13.442622950819676,15.49180327868852,4.754098360655742,15.655737704918028,6.967213114754096,13.196721311475413,7.868852459016
BOAXb	chr2	NonIntact	helitron	18.934426229508194,1.7213114754098378,11.967213114754099,20.81967213114754,19.508196721311474,16.47540983606557,16.63934426229508,21.803278688524593,15.573770491803273,4.8360655737704965,4.016393442622954,11.557377049180328,10.573770491803279,16.967213114
BOAXb	chr2	NonIntact	Gypsy_LTR_retrotransposon	2.8688524590163964,15.901639344262291,8.524590163934425,19.59016393442623,6.967213114754096,16.0655737704918,1.3114754098360666,11.967213114754099,12.54098360655738,12.54098360655738,10.163934426229508,9.754098360655737,9.01639344262295,21.147540983606557
BOAXb	chr2	NonIntact	hAT_TIR_transposon	12.295081967213116,12.459016393442624,16.31147540983606,21.229508196721312,15.163934426229511,20.737704918032787,14.098360655737707,13.606557377049183,21.885245901639347,8.688524590163933,13.852459016393446,20.983606557377048,20.901639344262293,13.2786885
BOAXb	chr2	NonIntact	Tc1_Mariner_TIR_transposon	15.49180327868852,10.655737704918032,11.885245901639346,9.344262295081966,12.295081967213116,11.39344262295082,17.377049180327866,15.573770491803273,15.737704918032781,15.49180327868852,15.737704918032781,19.42622950819672,24.09836065573771,18.688524590163933,20.081967213114755,13.36065573770492,11.967213114754099,16.47540983606557,21.229508196721312,21.475409836065577,13.688524590163937,14.01639…
BOAXb	chr3	NonIntact	CACTA_TIR_transposon	14.098360655737707,15.245901639344268,22.131147540983605,18.0327868852459,7.704918032786884,20.983606557377048,20.901639344262293,20.901639344262293,14.590163934426233,13.524590163934429,14.672131147540988,14.426229508196725,15.819672131147538,13.03278688
BOAXb	chr3	NonIntact	helitron	11.967213114754099,18.114754098360653,15.819672131147538,16.63934426229508,20.0,18.934426229508194,18.0327868852459,15.081967213114758,16.0655737704918,14.50819672131148,19.344262295081965,19.344262295081965,19.344262295081965,19.344262295081965,13.278688
BOAXb	chr3	NonIntact	hAT_TIR_transposon	23.442622950819676,14.344262295081972,12.213114754098363,17.786885245901637,9.836065573770492,10.163934426229508,12.049180327868855,11.065573770491802,24.34426229508197,22.54098360655738,20.901639344262293,8.688524590163933,7.540983606557375,13.9344262295
BOAXb	chr3	NonIntact	Mutator_TIR_transposon	22.213114754098363,23.442622950819676,7.786885245901637,2.1311475409836085,4.016393442622954,9.754098360655737,18.606557377049178,14.754098360655743,14.180327868852462,14.344262295081972,14.836065573770496,14.836065573770496,20.901639344262293,19.67213114
BOAXb	chr3	NonIntact	LTR_retrotransposon	14.098360655737707,9.754098360655737,4.180327868852463,3.852459016393446,19.59016393442623,7.295081967213112,12.95081967213115,10.081967213114753,2.377049180327871,2.049180327868854,3.852459016393446,19.754098360655735,6.885245901639341,6.147540983606554,
BOAXb	chr3	NonIntact	Gypsy_LTR_retrotransposon	16.557377049180324,16.557377049180324,7.540983606557375,6.885245901639341,9.59016393442623,16.393442622950815,16.393442622950815,7.295081967213112,17.540983606557372,15.409836065573767,22.37704918032787,4.754098360655742,11.475409836065575,19.344262295081
BOAXb	chr3	NonIntact	Copia_LTR_retrotransposon	8.196721311475407,4.50819672131148,15.000000000000004,17.1311475409836,15.327868852459021,7.213114754098358,1.6393442622950833,12.131147540983608,15.819672131147538,17.786885245901637,11.475409836065575,15.737704918032781,14.262295081967215,13.03278688524
BOAXb	chr3	NonIntact	PIF_Harbinger_TIR_transposon	14.016393442622954,3.9344262295082,15.573770491803273,10.98360655737705,22.868852459016395,20.0,18.606557377049178,15.655737704918028,20.573770491803277,18.852459016393443,6.967213114754096,17.45901639344262,18.0327868852459,16.22950819672131,17.540983606
BOAXb	chr3	NonIntact	Tc1_Mariner_TIR_transposon	10.737704918032788,11.721311475409838,5.819672131147537,20.983606557377048,14.426229508196725,15.409836065573767,4.9180327868852505,15.655737704918028,13.442622950819676,14.91803278688525,20.163934426229506,18.114754098360653,9.918032786885245,20.655737704918035,16.72131147540983,11.639344262295085,24.016393442622952,13.688524590163937,8.524590163934425,14.180327868852462,12.459016393442624,21.14…
BOAXb	chr4	NonIntact	Mutator_TIR_transposon	5.737704918032783,9.426229508196721,5.901639344262291,23.934426229508198,17.704918032786882,10.40983606557377,8.114754098360654,4.262295081967217,11.311475409836067,16.557377049180324,16.72131147540983,20.40983606557377,12.54098360655738,10.49180327868852
BOAXb	chr4	NonIntact	hAT_TIR_transposon	7.704918032786884,15.081967213114758,8.770491803278686,14.016393442622954,12.213114754098363,15.737704918032781,18.688524590163933,1.7213114754098378,10.901639344262296,15.000000000000004,15.081967213114758,3.524590163934429,5.245901639344258,16.311475409
BOAXb	chr4	NonIntact	Copia_LTR_retrotransposon	2.049180327868854,7.131147540983603,14.836065573770496,7.786885245901637,17.704918032786882,2.7049180327868876,19.01639344262295,6.5573770491803245,12.868852459016395,12.786885245901642,12.213114754098363,19.918032786885245,23.114754098360656,16.393442622
BOAXb	chr4	NonIntact	LTR_retrotransposon	14.262295081967215,9.59016393442623,7.704918032786884,8.442622950819672,5.655737704918029,5.081967213114759,3.524590163934429,4.590163934426233,10.655737704918032,6.229508196721308,4.262295081967217,8.278688524590162,13.524590163934429,8.934426229508196,4
BOAXb	chr4	NonIntact	helitron	16.0655737704918,13.278688524590166,8.688524590163933,11.639344262295085,21.311475409836063,15.737704918032781,8.114754098360654,17.950819672131143,15.000000000000004,21.065573770491806,15.737704918032781,14.426229508196725,19.0983606557377,13.60655737704
BOAXb	chr4	NonIntact	Gypsy_LTR_retrotransposon	5.327868852459011,8.934426229508196,2.377049180327871,13.032786885245905,12.95081967213115,12.459016393442624,19.42622950819672,11.557377049180328,11.065573770491802,9.344262295081966,10.327868852459018,12.459016393442624,5.1639344262295035,6.147540983606
BOAXb	chr4	NonIntact	PIF_Harbinger_TIR_transposon	18.934426229508194,21.311475409836063,19.918032786885245,12.622950819672134,12.213114754098363,19.0983606557377,21.393442622950822,9.672131147540982,18.852459016393443,17.21311475409836,17.86885245901639,17.21311475409836,20.491803278688526,14.18032786885
BOAXb	chr4	NonIntact	CACTA_TIR_transposon	13.36065573770492,14.180327868852462,19.01639344262295,18.688524590163933,12.049180327868855,20.655737704918035,15.163934426229511,10.98360655737705,15.245901639344268,12.131147540983608,10.737704918032788,11.475409836065575,15.573770491803273,10.81967213
BOAXb	chr4	NonIntact	Tc1_Mariner_TIR_transposon	22.54098360655738,18.360655737704917,14.180327868852462,10.40983606557377,11.311475409836067,15.901639344262291,12.37704918032787,12.459016393442624,12.459016393442624,23.77049180327869,23.36065573770492,14.91803278688525,15.901639344262291,13.442622950819676,15.901639344262291,13.114754098360658,21.065573770491806,20.737704918032787,21.885245901639347,23.77049180327869,14.180327868852462,11.8032…
BOAXb	chr5	NonIntact	Mutator_TIR_transposon	2.5409836065573796,10.819672131147541,2.95081967213115,11.639344262295085,2.95081967213115,10.655737704918032,2.049180327868854,11.639344262295085,2.95081967213115,10.901639344262296,2.2950819672131164,11.147540983606559,2.7049180327868876,11.147540983606
BOAXb	chr5	NonIntact	Gypsy_LTR_retrotransposon	15.000000000000004,14.262295081967215,17.62295081967213,2.8688524590163964,12.54098360655738,9.180327868852459,8.770491803278686,23.934426229508198,5.409836065573766,9.098360655737704,13.114754098360658,12.295081967213116,1.3114754098360666,13.93442622950
BOAXb	chr5	NonIntact	Copia_LTR_retrotransposon	12.95081967213115,11.721311475409838,8.114754098360654,7.868852459016391,11.229508196721312,18.0327868852459,10.655737704918032,1.7213114754098378,22.622950819672134,4.262295081967217,22.54098360655738,23.27868852459017,17.45901639344262,10.40983606557377
BOAXb	chr5	NonIntact	LTR_retrotransposon	16.63934426229508,18.934426229508194,16.803278688524586,7.459016393442621,12.131147540983608,3.688524590163938,8.114754098360654,4.590163934426233,4.344262295081971,14.50819672131148,6.393442622950817,11.147540983606559,7.131147540983603,9.426229508196721
BOAXb	chr5	NonIntact	hAT_TIR_transposon	9.098360655737704,5.245901639344258,10.327868852459018,24.590163934426233,22.54098360655738,18.688524590163933,18.196721311475407,14.016393442622954,15.655737704918028,10.081967213114753,10.081967213114753,4.262295081967217,20.901639344262293,20.819672131
BOAXb	chr5	NonIntact	Tc1_Mariner_TIR_transposon	16.22950819672131,13.852459016393446,12.54098360655738,9.754098360655737,17.377049180327866,17.04918032786885,19.754098360655735,11.967213114754099,12.459016393442624,21.229508196721312,16.22950819672131,18.852459016393443,12.295081967213116,21.557377049180328,12.868852459016395,3.6065573770491834,21.393442622950822,24.426229508196727,6.229508196721308,2.95081967213115,10.901639344262296,4.590163…
BOAXb	chr5	NonIntact	helitron	16.47540983606557,16.967213114754095,3.0327868852459043,20.245901639344265,18.606557377049178,17.21311475409836,17.45901639344262,21.9672131147541,15.573770491803273,13.278688524590166,9.918032786885245,21.475409836065577,23.934426229508198,21.80327868852
BOAXb	chr5	NonIntact	CACTA_TIR_transposon	19.262295081967213,19.508196721311474,24.50819672131148,15.163934426229511,5.819672131147537,13.852459016393446,18.934426229508194,10.163934426229508,15.081967213114758,22.131147540983605,22.622950819672134,20.737704918032787,16.22950819672131,18.44262295
BOAXb	chr5	NonIntact	PIF_Harbinger_TIR_transposon	16.22950819672131,20.737704918032787,7.786885245901637,10.901639344262296,20.245901639344265,23.032786885245905,6.6393442622950785,18.360655737704917,18.770491803278688,19.672131147540984,16.885245901639344,18.852459016393443,12.704918032786887,20.4098360
BOAXb	chr6	NonIntact	Mutator_TIR_transposon	2.2950819672131164,14.098360655737707,2.7049180327868876,12.54098360655738,3.4426229508196755,11.639344262295085,2.95081967213115,11.311475409836067,2.2950819672131164,11.475409836065575,2.2950819672131164,11.147540983606559,2.7049180327868876,11.31147540
BOAXb	chr6	NonIntact	LTR_retrotransposon	3.1147540983606588,5.819672131147537,15.327868852459021,0.6557377049180333,15.327868852459021,12.786885245901642,10.0,16.72131147540983,15.081967213114758,4.50819672131148,8.0327868852459,5.737704918032783,20.327868852459016,14.016393442622954,6.065573770
BOAXb	chr6	NonIntact	helitron	20.081967213114755,20.081967213114755,19.672131147540984,19.672131147540984,18.196721311475407,19.672131147540984,19.672131147540984,18.0327868852459,18.770491803278688,19.754098360655735,19.754098360655735,18.934426229508194,18.934426229508194,5.57377049
BOAXb	chr6	NonIntact	Copia_LTR_retrotransposon	5.327868852459011,9.59016393442623,9.262295081967212,10.40983606557377,7.868852459016391,3.6065573770491834,7.213114754098358,6.311475409836063,13.114754098360658,12.868852459016395,8.852459016393441,11.147540983606559,12.295081967213116,19.0983606557377,
BOAXb	chr6	NonIntact	CACTA_TIR_transposon	20.983606557377048,21.065573770491806,21.065573770491806,21.065573770491806,20.901639344262293,11.39344262295082,10.901639344262296,19.18032786885246,16.967213114754095,23.36065573770492,9.918032786885245,4.672131147540988,19.344262295081965,20.4098360655
BOAXb	chr6	NonIntact	hAT_TIR_transposon	0.7377049180327875,7.786885245901637,1.9672131147541,14.344262295081972,10.655737704918032,18.442622950819672,14.91803278688525,15.901639344262291,22.70491803278689,7.04918032786885,6.065573770491799,14.50819672131148,14.50819672131148,6.803278688524587,1
BOAXb	chr6	NonIntact	PIF_Harbinger_TIR_transposon	16.31147540983606,12.295081967213116,14.098360655737707,11.967213114754099,15.327868852459021,2.213114754098363,9.918032786885245,18.360655737704917,11.885245901639346,19.42622950819672,15.49180327868852,19.262295081967213,15.245901639344268,14.91803278688525,6.885245901639341,3.4426229508196755,20.327868852459016,24.426229508196727,13.770491803278691,11.639344262295085,8.442622950819672,19.42622…
BOAXb	chr6	NonIntact	Gypsy_LTR_retrotransposon	16.63934426229508,4.50819672131148,5.327868852459011,8.196721311475407,18.360655737704917,17.86885245901639,16.147540983606554,17.21311475409836,20.81967213114754,4.344262295081971,12.459016393442624,10.819672131147541,13.196721311475413,14.75409836065574
BOAXb	chr6	NonIntact	Tc1_Mariner_TIR_transposon	16.885245901639344,15.245901639344268,14.180327868852462,14.426229508196725,14.672131147540988,13.196721311475413,13.852459016393446,20.983606557377048,12.54098360655738,11.065573770491802,15.245901639344268,17.04918032786885,15.000000000000004,11.065573770491802,16.393442622950815,14.91803278688525,7.704918032786884,14.344262295081972,15.409836065573767,17.786885245901637,24.590163934426233,10.5…
BOAXb	chr7	NonIntact	CACTA_TIR_transposon	7.213114754098358,6.4754098360655705,13.36065573770492,5.49180327868852,11.967213114754099,14.016393442622954,4.672131147540988,5.327868852459011,8.934426229508196,11.311475409836067,15.163934426229511,12.37704918032787,17.1311475409836,12.459016393442624
BOAXb	chr7	NonIntact	Gypsy_LTR_retrotransposon	4.180327868852463,10.901639344262296,15.327868852459021,4.262295081967217,6.393442622950817,17.786885245901637,14.344262295081972,12.459016393442624,7.868852459016391,5.000000000000004,7.540983606557375,21.9672131147541,8.60655737704918,6.803278688524587,
BOAXb	chr7	NonIntact	LTR_retrotransposon	4.590163934426233,12.54098360655738,6.4754098360655705,17.04918032786885,16.967213114754095,14.754098360655743,7.786885245901637,23.524590163934427,13.442622950819676,10.491803278688524,15.000000000000004,15.000000000000004,3.1147540983606588,18.114754098
BOAXb	chr7	NonIntact	Copia_LTR_retrotransposon	16.22950819672131,3.2786885245901667,20.901639344262293,21.721311475409834,15.655737704918028,16.967213114754095,11.557377049180328,18.278688524590162,21.721311475409834,19.344262295081965,13.36065573770492,21.803278688524593,20.163934426229506,19.9180327
BOAXb	chr7	NonIntact	helitron	18.688524590163933,20.491803278688526,14.91803278688525,10.98360655737705,21.065573770491806,8.852459016393441,13.278688524590166,19.344262295081965,20.737704918032787,20.737704918032787,15.655737704918028,4.672131147540988,14.91803278688525,14.8360655737
BOAXb	chr7	NonIntact	Mutator_TIR_transposon	10.655737704918032,18.360655737704917,14.91803278688525,18.360655737704917,8.278688524590162,10.819672131147541,17.04918032786885,19.344262295081965,19.18032786885246,21.721311475409834,6.885245901639341,10.819672131147541,17.950819672131143,22.4590163934
BOAXb	chr7	NonIntact	PIF_Harbinger_TIR_transposon	21.639344262295083,20.163934426229506,24.426229508196727,18.770491803278688,18.196721311475407,24.590163934426233,7.213114754098358,7.540983606557375,14.426229508196725,16.885245901639344,20.245901639344265,4.098360655737708,18.0327868852459,23.2786885245
BOAXb	chr7	NonIntact	hAT_TIR_transposon	11.229508196721312,15.901639344262291,11.721311475409838,11.639344262295085,14.262295081967215,16.147540983606554,13.196721311475413,15.081967213114758,8.770491803278686,15.49180327868852,14.180327868852462,13.934426229508201,11.229508196721312,10.1639344
BOAXb	chr7	NonIntact	Tc1_Mariner_TIR_transposon	12.704918032786887,17.950819672131143,19.83606557377049,18.278688524590162,4.50819672131148,7.622950819672129,16.885245901639344,21.229508196721312,3.688524590163938,10.245901639344263,22.54098360655738,13.524590163934429,16.967213114754095,0.0,14.016393442622954,11.147540983606559,14.672131147540988,14.344262295081972,15.409836065573767,12.868852459016395,23.442622950819676,23.77049180327869,24.…
BOAXb	chr8	NonIntact	Mutator_TIR_transposon	1.6393442622950833,13.114754098360658,2.95081967213115,12.622950819672134,2.95081967213115,14.016393442622954,2.95081967213115,14.672131147540988,3.1967213114754123,11.639344262295085,2.2950819672131164,13.524590163934429,2.7049180327868876,11.63934426229
BOAXb	chr8	NonIntact	hAT_TIR_transposon	10.819672131147541,7.622950819672129,1.0655737704918042,0.0,6.229508196721308,9.01639344262295,2.95081967213115,4.50819672131148,21.393442622950822,12.704918032786887,12.213114754098363,14.426229508196725,6.229508196721308,8.852459016393441,8.606557377049
BOAXb	chr8	NonIntact	Copia_LTR_retrotransposon	10.737704918032788,5.081967213114759,14.262295081967215,10.737704918032788,7.377049180327866,10.98360655737705,10.245901639344263,7.786885245901637,7.868852459016391,3.9344262295082,13.196721311475413,21.557377049180328,15.819672131147538,12.0491803278688
BOAXb	chr8	NonIntact	LTR_retrotransposon	16.803278688524586,12.213114754098363,14.50819672131148,13.524590163934429,0.40983606557377084,14.426229508196725,15.655737704918028,8.770491803278686,16.63934426229508,10.327868852459018,7.04918032786885,17.45901639344262,15.737704918032781,7.78688524590
BOAXb	chr8	NonIntact	helitron	20.491803278688526,14.590163934426233,11.39344262295082,12.868852459016395,18.196721311475407,22.459016393442624,15.000000000000004,11.311475409836067,16.22950819672131,20.163934426229506,18.442622950819672,20.491803278688526,20.245901639344265,14.2622950
BOAXb	chr8	NonIntact	PIF_Harbinger_TIR_transposon	13.606557377049183,11.147540983606559,21.475409836065577,15.983606557377046,23.114754098360656,12.622950819672134,8.770491803278686,11.967213114754099,20.327868852459016,15.49180327868852,16.885245901639344,14.836065573770496,16.22950819672131,9.180327868852459,11.967213114754099,20.655737704918035,13.114754098360658,21.229508196721312,14.590163934426233,23.60655737704918,16.0655737704918,15.5737…
BOAXb	chr8	NonIntact	CACTA_TIR_transposon	13.688524590163937,1.6393442622950833,1.5573770491803294,6.4754098360655705,5.1639344262295035,10.327868852459018,13.770491803278691,15.983606557377046,8.196721311475407,12.131147540983608,8.60655737704918,11.967213114754099,15.245901639344268,12.78688524
BOAXb	chr8	NonIntact	Gypsy_LTR_retrotransposon	3.0327868852459043,1.3114754098360666,11.885245901639346,9.672131147540982,8.524590163934425,20.327868852459016,10.40983606557377,9.180327868852459,14.016393442622954,7.786885245901637,3.9344262295082,20.163934426229506,18.934426229508194,9.09836065573770
BOAXb	chr8	NonIntact	Tc1_Mariner_TIR_transposon	19.672131147540984,14.590163934426233,21.065573770491806,6.5573770491803245,20.983606557377048,13.688524590163937,14.098360655737707,15.000000000000004,11.967213114754099,23.60655737704918,12.54098360655738,13.442622950819676,19.754098360655735,14.098360655737707,13.278688524590166,18.0327868852459,17.950819672131143,12.295081967213116,14.098360655737707,15.081967213114758,15.573770491803273,23.8…
BOAXb	chr9	NonIntact	Mutator_TIR_transposon	2.8688524590163964,11.639344262295085,2.2950819672131164,14.016393442622954,2.049180327868854,10.98360655737705,2.95081967213115,3.1147540983606588,13.196721311475413,2.7049180327868876,15.000000000000004,2.7049180327868876,14.016393442622954,3.4426229508
BOAXb	chr9	NonIntact	helitron	19.59016393442623,19.59016393442623,19.59016393442623,19.59016393442623,14.016393442622954,19.18032786885246,22.295081967213118,17.704918032786882,22.295081967213118,21.311475409836063,2.786885245901642,4.590163934426233,0.5737704918032791,4.6721311475409
BOAXb	chr9	NonIntact	CACTA_TIR_transposon	21.393442622950822,21.311475409836063,21.311475409836063,14.590163934426233,17.540983606557372,15.573770491803273,11.065573770491802,11.065573770491802,10.081967213114753,13.770491803278691,11.39344262295082,9.01639344262295,21.803278688524593,12.45901639
BOAXb	chr9	NonIntact	Gypsy_LTR_retrotransposon	5.409836065573766,3.4426229508196755,9.180327868852459,10.0,2.786885245901642,5.573770491803274,12.622950819672134,12.622950819672134,12.213114754098363,14.836065573770496,13.36065573770492,13.36065573770492,13.36065573770492,13.36065573770492,13.36065573
BOAXb	chr9	NonIntact	Copia_LTR_retrotransposon	13.196721311475413,11.885245901639346,18.0327868852459,15.655737704918028,18.688524590163933,6.147540983606554,8.0327868852459,13.688524590163937,6.229508196721308,11.475409836065575,8.934426229508196,12.295081967213116,13.278688524590166,13.1967213114754
BOAXb	chr9	NonIntact	LTR_retrotransposon	15.655737704918028,1.475409836065575,6.803278688524587,14.426229508196725,0.5737704918032791,7.540983606557375,5.819672131147537,12.54098360655738,4.344262295081971,16.47540983606557,4.754098360655742,8.524590163934425,10.0,3.4426229508196755,11.311475409
BOAXb	chr9	NonIntact	hAT_TIR_transposon	14.50819672131148,21.393442622950822,16.557377049180324,21.557377049180328,13.442622950819676,9.508196721311474,10.245901639344263,21.885245901639347,11.639344262295085,14.836065573770496,23.114754098360656,16.0655737704918,11.39344262295082,8.36065573770
BOAXb	chr9	NonIntact	PIF_Harbinger_TIR_transposon	10.491803278688524,12.786885245901642,17.45901639344262,23.19672131147541,10.573770491803279,8.524590163934425,24.50819672131148,20.983606557377048,13.934426229508201,20.737704918032787,18.688524590163933,10.163934426229508,19.754098360655735,17.29508196721311,23.77049180327869,15.983606557377046,12.131147540983608,13.032786885245905,16.22950819672131,22.459016393442624,21.229508196721312,21.1475…
BOAXb	chr9	NonIntact	Tc1_Mariner_TIR_transposon	12.131147540983608,23.27868852459017,16.63934426229508,17.950819672131143,24.016393442622952,10.081967213114753,19.0983606557377,19.59016393442623,20.081967213114755,20.081967213114755,17.45901639344262,13.852459016393446,16.803278688524586,15.409836065573767,22.78688524590164,15.245901639344268,6.5573770491803245,22.78688524590164,12.295081967213116,18.196721311475407,22.459016393442624,22.86885…
BOAXb	chrX	NonIntact	Mutator_TIR_transposon	3.2786885245901667,13.032786885245905,2.2950819672131164,13.524590163934429,2.2950819672131164,15.000000000000004,2.7049180327868876,13.524590163934429,2.049180327868854,13.032786885245905,2.7049180327868876,11.311475409836067,2.7049180327868876,12.049180
BOAXb	chrX	NonIntact	LTR_retrotransposon	12.295081967213116,18.442622950819672,14.672131147540988,4.098360655737708,12.54098360655738,11.147540983606559,7.9508196721311455,17.04918032786885,9.344262295081966,10.491803278688524,18.196721311475407,2.4590163934426252,11.80327868852459,14.0163934426
BOAXb	chrX	NonIntact	Copia_LTR_retrotransposon	20.901639344262293,22.295081967213118,9.754098360655737,11.80327868852459,23.852459016393446,20.0,22.131147540983605,23.27868852459017,12.868852459016395,5.245901639344258,0.5737704918032791,3.688524590163938,0.5737704918032791,11.475409836065575,12.04918
BOAXb	chrX	NonIntact	PIF_Harbinger_TIR_transposon	10.737704918032788,17.1311475409836,8.442622950819672,24.09836065573771,21.803278688524593,11.311475409836067,19.508196721311474,14.50819672131148,18.524590163934423,20.81967213114754,23.19672131147541,10.245901639344263,19.918032786885245,13.852459016393
BOAXb	chrX	NonIntact	CACTA_TIR_transposon	9.836065573770492,20.0,18.606557377049178,20.245901639344265,14.016393442622954,24.262295081967217,2.2950819672131164,13.934426229508201,13.36065573770492,24.09836065573771,10.163934426229508,22.213114754098363,20.163934426229506,21.803278688524593,17.459
BOAXb	chrX	NonIntact	helitron	16.147540983606554,19.59016393442623,19.59016393442623,9.59016393442623,23.36065573770492,12.131147540983608,14.180327868852462,16.47540983606557,20.983606557377048,20.573770491803277,18.852459016393443,16.63934426229508,19.01639344262295,22.0491803278688
BOAXb	chrX	NonIntact	Gypsy_LTR_retrotransposon	7.04918032786885,3.1147540983606588,15.000000000000004,16.22950819672131,19.344262295081965,16.0655737704918,15.245901639344268,17.29508196721311,18.770491803278688,21.311475409836063,13.36065573770492,21.311475409836063,4.180327868852463,24.5081967213114
BOAXb	chrX	NonIntact	hAT_TIR_transposon	17.04918032786885,9.754098360655737,17.86885245901639,18.934426229508194,19.918032786885245,17.786885245901637,10.40983606557377,15.819672131147538,2.8688524590163964,12.37704918032787,11.80327868852459,18.360655737704917,3.360655737704921,17.131147540983
BOAXb	chrX	NonIntact	Tc1_Mariner_TIR_transposon	16.967213114754095,9.754098360655737,23.27868852459017,12.295081967213116,19.01639344262295,15.49180327868852,16.22950819672131,12.786885245901642,11.967213114754099,16.967213114754095,12.37704918032787,15.901639344262291,13.196721311475413,17.704918032786882,19.672131147540984,24.016393442622952,12.295081967213116,12.213114754098363,23.27868852459017,14.672131147540988,5.245901639344258,5.819672…
CBDRX	chr1	NonIntact	Copia_LTR_retrotransposon	9.508196721311474,16.967213114754095,16.0655737704918,5.327868852459011,20.245901639344265,6.311475409836063,5.409836065573766,10.327868852459018,7.295081967213112,7.786885245901637,7.04918032786885,23.442622950819676,20.983606557377048,2.4590163934426252
CBDRX	chr1	NonIntact	Mutator_TIR_transposon	20.737704918032787,20.40983606557377,13.852459016393446,11.147540983606559,10.163934426229508,6.147540983606554,11.065573770491802,12.131147540983608,12.54098360655738,12.049180327868855,4.426229508196726,23.36065573770492,14.344262295081972,17.2950819672
CBDRX	chr1	NonIntact	CACTA_TIR_transposon	13.36065573770492,16.47540983606557,10.40983606557377,20.983606557377048,18.360655737704917,13.852459016393446,21.9672131147541,15.327868852459021,12.049180327868855,20.81967213114754,20.81967213114754,5.819672131147537,4.344262295081971,2.540983606557379
CBDRX	chr1	NonIntact	helitron	19.0983606557377,19.42622950819672,13.278688524590166,3.4426229508196755,18.0327868852459,13.524590163934429,20.327868852459016,18.606557377049178,15.409836065573767,12.213114754098363,9.344262295081966,14.098360655737707,20.573770491803277,14.59016393442
CBDRX	chr1	NonIntact	Tc1_Mariner_TIR_transposon	15.163934426229511,9.918032786885245,10.819672131147541,17.704918032786882,17.1311475409836,16.31147540983606,14.836065573770496,14.836065573770496,23.934426229508198,16.22950819672131,11.229508196721312,15.163934426229511,19.01639344262295,12.37704918032787,9.59016393442623,15.901639344262291,9.918032786885245,11.967213114754099,14.344262295081972,11.639344262295085,11.639344262295085,19.5901639…
CBDRX	chr1	NonIntact	hAT_TIR_transposon	9.01639344262295,11.147540983606559,10.163934426229508,17.704918032786882,19.0983606557377,14.590163934426233,14.344262295081972,16.47540983606557,16.147540983606554,3.9344262295082,18.360655737704917,15.819672131147538,9.180327868852459,17.54098360655737
CBDRX	chr1	NonIntact	LTR_retrotransposon	15.000000000000004,7.213114754098358,17.04918032786885,13.606557377049183,21.639344262295083,19.262295081967213,7.131147540983603,5.983606557377045,7.131147540983603,6.311475409836063,3.360655737704921,1.475409836065575,8.934426229508196,7.295081967213112
CBDRX	chr1	NonIntact	Gypsy_LTR_retrotransposon	5.081967213114759,14.262295081967215,17.45901639344262,20.163934426229506,22.37704918032787,17.04918032786885,21.065573770491806,14.098360655737707,16.967213114754095,10.737704918032788,4.8360655737704965,16.557377049180324,11.229508196721312,4.4262295081
CBDRX	chr1	NonIntact	PIF_Harbinger_TIR_transposon	13.688524590163937,23.934426229508198,14.91803278688525,18.0327868852459,22.70491803278689,13.524590163934429,12.704918032786887,6.5573770491803245,20.573770491803277,15.901639344262291,17.86885245901639,13.852459016393446,12.54098360655738,12.786885245901642,17.540983606557372,12.459016393442624,16.0655737704918,16.72131147540983,12.54098360655738,15.163934426229511,16.393442622950815,13.8524590…
CBDRX	chr2	NonIntact	Copia_LTR_retrotransposon	22.622950819672134,20.081967213114755,6.6393442622950785,20.81967213114754,9.754098360655737,20.901639344262293,20.327868852459016,20.81967213114754,6.6393442622950785,12.295081967213116,2.2950819672131164,23.19672131147541,24.180327868852462,23.524590163
CBDRX	chr2	NonIntact	Gypsy_LTR_retrotransposon	0.9016393442622959,12.95081967213115,21.147540983606557,6.967213114754096,14.91803278688525,18.278688524590162,0.6557377049180333,20.0,15.819672131147538,5.573770491803274,3.2786885245901667,11.311475409836067,16.557377049180324,16.72131147540983,18.85245
CBDRX	chr2	NonIntact	LTR_retrotransposon	5.327868852459011,9.01639344262295,14.262295081967215,10.163934426229508,10.40983606557377,15.737704918032781,20.983606557377048,12.131147540983608,14.590163934426233,18.852459016393443,16.967213114754095,3.524590163934429,11.885245901639346,2.13114754098
CBDRX	chr2	NonIntact	helitron	14.836065573770496,14.754098360655743,20.491803278688526,21.147540983606557,23.524590163934427,23.934426229508198,24.426229508196727,6.721311475409832,4.9180327868852505,20.737704918032787,23.27868852459017,18.360655737704917,16.557377049180324,19.3442622
CBDRX	chr2	NonIntact	Mutator_TIR_transposon	14.50819672131148,17.540983606557372,17.86885245901639,19.344262295081965,6.393442622950817,7.131147540983603,19.0983606557377,9.672131147540982,12.704918032786887,13.770491803278691,4.754098360655742,21.147540983606557,7.786885245901637,7.459016393442621
CBDRX	chr2	NonIntact	CACTA_TIR_transposon	17.950819672131143,8.770491803278686,14.344262295081972,16.72131147540983,11.967213114754099,16.0655737704918,5.1639344262295035,6.721311475409832,7.377049180327866,11.639344262295085,12.95081967213115,7.540983606557375,13.688524590163937,7.62295081967212
CBDRX	chr2	NonIntact	hAT_TIR_transposon	11.967213114754099,17.786885245901637,10.40983606557377,16.557377049180324,7.377049180327866,9.672131147540982,12.868852459016395,16.393442622950815,15.901639344262291,20.737704918032787,15.081967213114758,14.180327868852462,7.459016393442621,19.672131147
CBDRX	chr2	NonIntact	PIF_Harbinger_TIR_transposon	12.049180327868855,15.901639344262291,12.95081967213115,10.327868852459018,18.0327868852459,20.901639344262293,4.590163934426233,11.147540983606559,18.278688524590162,15.000000000000004,7.459016393442621,10.573770491803279,9.180327868852459,21.065573770491806,18.688524590163933,15.163934426229511,18.196721311475407,20.737704918032787,19.18032786885246,18.196721311475407,22.54098360655738,18.19672…
CBDRX	chr2	NonIntact	Tc1_Mariner_TIR_transposon	21.311475409836063,17.04918032786885,13.524590163934429,13.442622950819676,18.524590163934423,21.639344262295083,15.819672131147538,16.393442622950815,17.377049180327866,13.770491803278691,12.95081967213115,20.245901639344265,12.295081967213116,19.83606557377049,17.950819672131143,10.081967213114753,13.196721311475413,11.885245901639346,20.245901639344265,20.327868852459016,15.163934426229511,21.…
CBDRX	chr3	NonIntact	Copia_LTR_retrotransposon	19.344262295081965,20.737704918032787,20.737704918032787,13.032786885245905,10.901639344262296,22.213114754098363,19.42622950819672,8.934426229508196,12.95081967213115,10.327868852459018,11.80327868852459,4.590163934426233,14.672131147540988,22.4590163934
CBDRX	chr3	NonIntact	PIF_Harbinger_TIR_transposon	18.360655737704917,22.37704918032787,13.36065573770492,15.901639344262291,17.86885245901639,17.45901639344262,15.409836065573767,21.229508196721312,16.557377049180324,22.622950819672134,16.47540983606557,13.688524590163937,13.278688524590166,18.196721311475407,16.63934426229508,21.639344262295083,17.786885245901637,21.065573770491806,11.39344262295082,16.967213114754095,13.524590163934429,16.0655…
CBDRX	chr3	NonIntact	CACTA_TIR_transposon	19.262295081967213,8.688524590163933,4.672131147540988,3.360655737704921,5.49180327868852,14.672131147540988,15.245901639344268,24.590163934426233,24.50819672131148,18.688524590163933,10.0,12.049180327868855,16.47540983606557,20.491803278688526,16.8032786
CBDRX	chr3	NonIntact	helitron	10.901639344262296,16.72131147540983,14.836065573770496,11.557377049180328,15.163934426229511,19.918032786885245,5.901639344262291,5.245901639344258,3.688524590163938,15.655737704918028,16.393442622950815,19.83606557377049,9.098360655737704,17.13114754098
CBDRX	chr3	NonIntact	hAT_TIR_transposon	16.147540983606554,18.360655737704917,21.393442622950822,14.590163934426233,15.245901639344268,16.147540983606554,16.147540983606554,21.639344262295083,14.016393442622954,19.42622950819672,11.147540983606559,11.065573770491802,14.180327868852462,9.5901639
CBDRX	chr3	NonIntact	Gypsy_LTR_retrotransposon	10.40983606557377,13.934426229508201,15.655737704918028,19.672131147540984,17.704918032786882,15.081967213114758,7.459016393442621,21.311475409836063,11.065573770491802,13.114754098360658,12.459016393442624,17.540983606557372,16.47540983606557,19.09836065
CBDRX	chr3	NonIntact	LTR_retrotransposon	10.901639344262296,14.91803278688525,18.0327868852459,10.245901639344263,14.344262295081972,16.63934426229508,23.60655737704918,6.885245901639341,14.180327868852462,13.114754098360658,8.196721311475407,10.901639344262296,17.62295081967213,13.8524590163934
CBDRX	chr3	NonIntact	Mutator_TIR_transposon	10.081967213114753,6.803278688524587,19.83606557377049,16.393442622950815,17.62295081967213,22.049180327868854,15.081967213114758,12.049180327868855,9.508196721311474,18.688524590163933,17.1311475409836,8.60655737704918,13.770491803278691,19.5081967213114
CBDRX	chr3	NonIntact	Tc1_Mariner_TIR_transposon	18.688524590163933,22.54098360655738,15.901639344262291,21.803278688524593,21.475409836065577,13.278688524590166,16.0655737704918,11.39344262295082,18.524590163934423,19.42622950819672,16.393442622950815,14.836065573770496,2.1311475409836085,14.180327868852462,3.7704918032786923,8.196721311475407,2.622950819672133,7.131147540983603,5.081967213114759,8.114754098360654,16.72131147540983,19.01639344…
CBDRX	chr4	NonIntact	helitron	4.262295081967217,10.491803278688524,17.29508196721311,15.081967213114758,17.86885245901639,24.016393442622952,15.081967213114758,13.770491803278691,15.655737704918028,19.0983606557377,18.524590163934423,12.786885245901642,15.901639344262291,15.4098360655
CBDRX	chr4	NonIntact	CACTA_TIR_transposon	13.36065573770492,14.426229508196725,8.114754098360654,15.081967213114758,18.114754098360653,22.868852459016395,6.967213114754096,9.672131147540982,13.770491803278691,23.60655737704918,20.737704918032787,14.91803278688525,20.081967213114755,9.098360655737
CBDRX	chr4	NonIntact	Mutator_TIR_transposon	11.80327868852459,11.475409836065575,17.29508196721311,15.901639344262291,19.18032786885246,9.508196721311474,19.42622950819672,18.360655737704917,12.622950819672134,13.606557377049183,3.4426229508196755,12.459016393442624,13.442622950819676,15.0000000000
CBDRX	chr4	NonIntact	Gypsy_LTR_retrotransposon	9.754098360655737,22.868852459016395,22.78688524590164,22.295081967213118,10.819672131147541,17.29508196721311,15.737704918032781,15.409836065573767,17.21311475409836,5.081967213114759,18.196721311475407,13.114754098360658,12.786885245901642,4.26229508196
CBDRX	chr4	NonIntact	hAT_TIR_transposon	19.262295081967213,14.426229508196725,15.737704918032781,0.9016393442622959,17.704918032786882,19.42622950819672,19.344262295081965,15.49180327868852,19.01639344262295,21.557377049180328,12.54098360655738,16.0655737704918,8.278688524590162,13.278688524590
CBDRX	chr4	NonIntact	LTR_retrotransposon	8.688524590163933,8.0327868852459,11.311475409836067,6.6393442622950785,17.1311475409836,20.245901639344265,19.918032786885245,18.934426229508194,14.590163934426233,5.081967213114759,11.80327868852459,8.688524590163933,11.967213114754099,13.19672131147541
CBDRX	chr4	NonIntact	Copia_LTR_retrotransposon	4.8360655737704965,9.508196721311474,1.393442622950821,5.655737704918029,5.655737704918029,20.40983606557377,9.344262295081966,17.86885245901639,1.2295081967213126,6.147540983606554,1.475409836065575,21.065573770491806,18.688524590163933,19.34426229508196
CBDRX	chr4	NonIntact	PIF_Harbinger_TIR_transposon	11.065573770491802,8.442622950819672,21.311475409836063,16.63934426229508,17.950819672131143,20.81967213114754,12.54098360655738,19.0983606557377,14.836065573770496,20.655737704918035,21.065573770491806,15.573770491803273,16.31147540983606,13.852459016393446,7.377049180327866,17.1311475409836,3.4426229508196755,18.770491803278688,15.327868852459021,12.95081967213115,16.72131147540983,13.688524590…
CBDRX	chr4	NonIntact	Tc1_Mariner_TIR_transposon	15.737704918032781,17.786885245901637,16.885245901639344,16.72131147540983,18.934426229508194,12.131147540983608,12.622950819672134,21.9672131147541,16.803278688524586,19.344262295081965,14.098360655737707,11.639344262295085,13.032786885245905,13.606557377049183,10.40983606557377,17.950819672131143,20.163934426229506,13.196721311475413,19.672131147540984,18.442622950819672,21.721311475409834,10.0…
CBDRX	chr5	NonIntact	Mutator_TIR_transposon	16.885245901639344,17.62295081967213,13.770491803278691,13.196721311475413,20.491803278688526,10.98360655737705,18.114754098360653,14.590163934426233,16.31147540983606,12.622950819672134,19.508196721311474,13.36065573770492,16.147540983606554,23.278688524
CBDRX	chr5	NonIntact	Gypsy_LTR_retrotransposon	22.049180327868854,19.18032786885246,12.95081967213115,21.311475409836063,17.540983606557372,23.114754098360656,14.754098360655743,18.278688524590162,13.36065573770492,20.163934426229506,20.983606557377048,10.163934426229508,6.6393442622950785,1.229508196
CBDRX	chr5	NonIntact	CACTA_TIR_transposon	20.655737704918035,18.770491803278688,8.852459016393441,10.573770491803279,10.327868852459018,20.40983606557377,11.147540983606559,11.311475409836067,21.557377049180328,16.0655737704918,16.0655737704918,22.868852459016395,22.295081967213118,20.0,21.885245
CBDRX	chr5	NonIntact	LTR_retrotransposon	19.344262295081965,14.426229508196725,7.295081967213112,11.721311475409838,9.836065573770492,11.721311475409838,13.606557377049183,11.311475409836067,13.36065573770492,12.295081967213116,6.065573770491799,19.508196721311474,14.344262295081972,18.032786885
CBDRX	chr5	NonIntact	Copia_LTR_retrotransposon	3.2786885245901667,21.393442622950822,13.934426229508201,2.2950819672131164,12.704918032786887,7.9508196721311455,12.049180327868855,2.4590163934426252,5.081967213114759,5.245901639344258,2.377049180327871,20.163934426229506,8.852459016393441,15.000000000
CBDRX	chr5	NonIntact	helitron	17.21311475409836,20.40983606557377,18.934426229508194,13.524590163934429,13.278688524590166,17.950819672131143,19.83606557377049,20.983606557377048,21.147540983606557,14.344262295081972,21.9672131147541,18.0327868852459,14.426229508196725,13.196721311475
CBDRX	chr5	NonIntact	hAT_TIR_transposon	18.606557377049178,12.213114754098363,22.459016393442624,14.262295081967215,17.04918032786885,19.672131147540984,5.000000000000004,19.754098360655735,11.80327868852459,7.704918032786884,16.72131147540983,13.196721311475413,21.721311475409834,18.6885245901
CBDRX	chr5	NonIntact	Tc1_Mariner_TIR_transposon	20.40983606557377,17.1311475409836,23.934426229508198,15.245901639344268,18.196721311475407,17.540983606557372,19.672131147540984,16.147540983606554,15.737704918032781,10.901639344262296,12.295081967213116,11.557377049180328,11.721311475409838,11.557377049180328,12.213114754098363,17.86885245901639,16.885245901639344,18.688524590163933,9.836065573770492,11.065573770491802,16.31147540983606,12.377…
CBDRX	chr5	NonIntact	PIF_Harbinger_TIR_transposon	19.754098360655735,15.655737704918028,9.426229508196721,7.704918032786884,14.262295081967215,13.606557377049183,24.016393442622952,16.47540983606557,13.196721311475413,11.721311475409838,10.163934426229508,22.459016393442624,5.1639344262295035,16.72131147540983,14.91803278688525,22.295081967213118,2.622950819672133,21.803278688524593,12.868852459016395,16.803278688524586,16.147540983606554,14.754…
CBDRX	chr6	NonIntact	Mutator_TIR_transposon	20.163934426229506,6.229508196721308,5.655737704918029,11.229508196721312,7.295081967213112,17.786885245901637,18.360655737704917,15.573770491803273,5.655737704918029,5.49180327868852,22.54098360655738,14.344262295081972,5.327868852459011,7.37704918032786
CBDRX	chr6	NonIntact	Copia_LTR_retrotransposon	3.6065573770491834,9.098360655737704,8.442622950819672,3.0327868852459043,6.393442622950817,6.4754098360655705,14.098360655737707,4.9180327868852505,18.442622950819672,0.9016393442622959,3.1147540983606588,4.50819672131148,4.50819672131148,0.0,2.950819672
CBDRX	chr6	NonIntact	CACTA_TIR_transposon	16.22950819672131,8.852459016393441,15.409836065573767,18.360655737704917,12.704918032786887,9.344262295081966,12.786885245901642,17.1311475409836,9.672131147540982,19.508196721311474,21.557377049180328,17.540983606557372,15.49180327868852,23.278688524590
CBDRX	chr6	NonIntact	LTR_retrotransposon	19.01639344262295,14.754098360655743,7.04918032786885,7.04918032786885,6.4754098360655705,14.91803278688525,10.245901639344263,12.95081967213115,3.360655737704921,18.360655737704917,7.622950819672129,20.737704918032787,3.852459016393446,1.8032786885245917
CBDRX	chr6	NonIntact	hAT_TIR_transposon	14.91803278688525,14.91803278688525,12.786885245901642,7.9508196721311455,18.278688524590162,5.901639344262291,3.1967213114754123,18.360655737704917,15.983606557377046,18.442622950819672,16.0655737704918,3.2786885245901667,21.065573770491806,19.5901639344
CBDRX	chr6	NonIntact	helitron	13.770491803278691,10.737704918032788,19.59016393442623,18.278688524590162,21.721311475409834,19.754098360655735,18.442622950819672,13.114754098360658,16.803278688524586,13.852459016393446,20.81967213114754,24.016393442622952,22.459016393442624,22.2950819
CBDRX	chr6	NonIntact	PIF_Harbinger_TIR_transposon	15.000000000000004,13.524590163934429,14.672131147540988,2.213114754098363,19.344262295081965,17.1311475409836,12.37704918032787,8.0327868852459,17.29508196721311,16.22950819672131,17.786885245901637,17.377049180327866,13.114754098360658,18.852459016393443,16.22950819672131,16.885245901639344,18.442622950819672,21.803278688524593,18.852459016393443,11.639344262295085,18.442622950819672,16.0655737…
CBDRX	chr6	NonIntact	Gypsy_LTR_retrotransposon	19.262295081967213,22.78688524590164,20.327868852459016,9.59016393442623,4.180327868852463,3.4426229508196755,3.852459016393446,5.081967213114759,19.344262295081965,20.573770491803277,18.0327868852459,15.245901639344268,21.393442622950822,3.52459016393442
CBDRX	chr6	NonIntact	Tc1_Mariner_TIR_transposon	11.311475409836067,10.98360655737705,15.245901639344268,19.0983606557377,24.09836065573771,10.327868852459018,10.98360655737705,19.508196721311474,14.91803278688525,16.967213114754095,17.1311475409836,11.311475409836067,12.704918032786887,23.442622950819676,15.000000000000004,14.098360655737707,9.836065573770492,17.86885245901639,18.360655737704917,22.295081967213118,13.278688524590166,11.6393442…
CBDRX	chr7	NonIntact	Mutator_TIR_transposon	23.19672131147541,23.19672131147541,24.34426229508197,19.754098360655735,20.327868852459016,2.213114754098363,20.655737704918035,13.852459016393446,18.770491803278688,14.262295081967215,17.29508196721311,19.754098360655735,20.327868852459016,1.63934426229
CBDRX	chr7	NonIntact	Tc1_Mariner_TIR_transposon	20.081967213114755,23.27868852459017,14.91803278688525,20.081967213114755,14.91803278688525,19.18032786885246,15.573770491803273,12.704918032786887,10.245901639344263,12.95081967213115,11.639344262295085,17.29508196721311,19.59016393442623,22.70491803278689,20.081967213114755,16.393442622950815,20.40983606557377,15.655737704918028,18.114754098360653,14.672131147540988,17.704918032786882,18.770491…
CBDRX	chr7	NonIntact	CACTA_TIR_transposon	17.540983606557372,16.47540983606557,18.360655737704917,14.098360655737707,10.081967213114753,16.0655737704918,16.967213114754095,18.524590163934423,16.31147540983606,9.426229508196721,9.01639344262295,8.0327868852459,10.819672131147541,20.655737704918035
CBDRX	chr7	NonIntact	hAT_TIR_transposon	6.803278688524587,12.459016393442624,16.22950819672131,4.262295081967217,2.622950819672133,7.213114754098358,13.114754098360658,10.40983606557377,7.622950819672129,6.147540983606554,7.131147540983603,4.672131147540988,4.8360655737704965,1.5573770491803294
CBDRX	chr7	NonIntact	Copia_LTR_retrotransposon	19.18032786885246,6.229508196721308,10.0,19.01639344262295,23.77049180327869,22.131147540983605,18.524590163934423,15.000000000000004,19.508196721311474,16.22950819672131,14.91803278688525,13.524590163934429,6.721311475409832,9.508196721311474,2.459016393
CBDRX	chr7	NonIntact	Gypsy_LTR_retrotransposon	6.5573770491803245,20.655737704918035,5.409836065573766,6.4754098360655705,6.393442622950817,17.29508196721311,19.344262295081965,18.524590163934423,16.803278688524586,15.983606557377046,17.04918032786885,19.754098360655735,13.032786885245905,15.245901639
CBDRX	chr7	NonIntact	LTR_retrotransposon	22.131147540983605,9.836065573770492,8.196721311475407,22.54098360655738,11.967213114754099,12.704918032786887,8.770491803278686,4.426229508196726,9.180327868852459,5.573770491803274,22.70491803278689,4.8360655737704965,17.29508196721311,14.01639344262295
CBDRX	chr7	NonIntact	helitron	19.918032786885245,15.983606557377046,11.229508196721312,17.540983606557372,11.39344262295082,5.819672131147537,1.9672131147541,24.50819672131148,18.278688524590162,21.393442622950822,13.606557377049183,13.934426229508201,14.91803278688525,21.639344262295
CBDRX	chr7	NonIntact	PIF_Harbinger_TIR_transposon	17.704918032786882,16.967213114754095,18.114754098360653,17.786885245901637,9.59016393442623,20.81967213114754,18.524590163934423,8.442622950819672,19.83606557377049,21.147540983606557,17.377049180327866,22.459016393442624,17.704918032786882,16.393442622950815,16.31147540983606,23.19672131147541,15.655737704918028,17.1311475409836,10.573770491803279,12.213114754098363,17.86885245901639,19.1803278…
CBDRX	chr8	NonIntact	LTR_retrotransposon	10.327868852459018,7.213114754098358,20.573770491803277,13.524590163934429,13.524590163934429,16.147540983606554,6.065573770491799,9.180327868852459,18.278688524590162,8.0327868852459,9.59016393442623,10.081967213114753,3.688524590163938,15.81967213114753
CBDRX	chr8	NonIntact	Mutator_TIR_transposon	13.524590163934429,15.49180327868852,15.49180327868852,8.934426229508196,11.639344262295085,12.868852459016395,16.803278688524586,8.0327868852459,6.885245901639341,10.819672131147541,7.131147540983603,2.786885245901642,14.262295081967215,11.63934426229508
CBDRX	chr8	NonIntact	Copia_LTR_retrotransposon	8.0327868852459,6.5573770491803245,14.426229508196725,10.655737704918032,11.80327868852459,10.98360655737705,10.98360655737705,10.98360655737705,9.672131147540982,4.344262295081971,11.311475409836067,6.229508196721308,8.934426229508196,7.04918032786885,10
CBDRX	chr8	NonIntact	hAT_TIR_transposon	11.721311475409838,15.655737704918028,14.590163934426233,19.754098360655735,19.754098360655735,4.344262295081971,13.36065573770492,11.065573770491802,16.72131147540983,12.95081967213115,6.967213114754096,19.18032786885246,12.459016393442624,17.37704918032
CBDRX	chr8	NonIntact	Gypsy_LTR_retrotransposon	6.4754098360655705,13.114754098360658,14.50819672131148,24.262295081967217,10.163934426229508,13.36065573770492,4.098360655737708,3.360655737704921,10.081967213114753,3.524590163934429,17.21311475409836,17.21311475409836,17.21311475409836,5.57377049180327
CBDRX	chr8	NonIntact	helitron	11.311475409836067,19.508196721311474,4.754098360655742,5.655737704918029,17.377049180327866,16.63934426229508,21.065573770491806,23.60655737704918,6.721311475409832,11.229508196721312,5.409836065573766,5.819672131147537,17.377049180327866,21.065573770491
CBDRX	chr8	NonIntact	CACTA_TIR_transposon	21.639344262295083,17.21311475409836,24.426229508196727,13.934426229508201,23.114754098360656,19.83606557377049,17.86885245901639,14.590163934426233,20.737704918032787,17.45901639344262,12.049180327868855,16.393442622950815,20.81967213114754,15.9836065573
CBDRX	chr8	NonIntact	Tc1_Mariner_TIR_transposon	12.131147540983608,21.557377049180328,23.27868852459017,13.770491803278691,21.147540983606557,12.37704918032787,10.98360655737705,13.196721311475413,12.37704918032787,14.180327868852462,23.36065573770492,22.70491803278689,22.459016393442624,9.262295081967212,16.63934426229508,19.0983606557377,17.950819672131143,10.98360655737705,9.836065573770492,22.70491803278689,21.311475409836063,12.7868852459…
CBDRX	chr8	NonIntact	PIF_Harbinger_TIR_transposon	16.72131147540983,8.196721311475407,11.80327868852459,1.8032786885245917,16.393442622950815,10.40983606557377,7.786885245901637,17.62295081967213,18.0327868852459,13.196721311475413,17.86885245901639,18.852459016393443,11.967213114754099,24.426229508196727,10.163934426229508,16.967213114754095,15.737704918032781,13.606557377049183,5.1639344262295035,9.836065573770492,10.40983606557377,10.32786885…
CBDRX	chr9	NonIntact	Mutator_TIR_transposon	1.3114754098360666,0.0,16.393442622950815,17.704918032786882,11.311475409836067,3.852459016393446,5.49180327868852,13.278688524590166,9.098360655737704,5.737704918032783,14.672131147540988,16.31147540983606,13.524590163934429,13.770491803278691,16.8032786
CBDRX	chr9	NonIntact	PIF_Harbinger_TIR_transposon	13.196721311475413,8.0327868852459,7.868852459016391,11.885245901639346,9.918032786885245,23.60655737704918,19.262295081967213,18.524590163934423,18.770491803278688,16.0655737704918,19.01639344262295,11.967213114754099,9.01639344262295,11.721311475409838,16.967213114754095,18.0327868852459,24.590163934426233,7.868852459016391,15.163934426229511,20.40983606557377,22.213114754098363,14.590163934426…
CBDRX	chr9	NonIntact	LTR_retrotransposon	12.54098360655738,1.9672131147541,8.0327868852459,5.000000000000004,14.262295081967215,16.393442622950815,6.803278688524587,10.901639344262296,10.163934426229508,14.344262295081972,14.590163934426233,14.590163934426233,3.688524590163938,4.262295081967217,
CBDRX	chr9	NonIntact	hAT_TIR_transposon	16.63934426229508,16.885245901639344,15.327868852459021,14.344262295081972,14.590163934426233,9.59016393442623,10.0,13.934426229508201,16.22950819672131,19.0983606557377,12.131147540983608,17.950819672131143,12.37704918032787,6.229508196721308,8.360655737
CBDRX	chr9	NonIntact	Copia_LTR_retrotransposon	17.29508196721311,15.245901639344268,20.163934426229506,10.491803278688524,13.770491803278691,5.901639344262291,3.2786885245901667,8.114754098360654,5.245901639344258,16.147540983606554,4.262295081967217,12.131147540983608,9.59016393442623,12.622950819672
CBDRX	chr9	NonIntact	CACTA_TIR_transposon	8.114754098360654,10.737704918032788,20.81967213114754,17.45901639344262,17.21311475409836,12.54098360655738,9.918032786885245,7.622950819672129,9.918032786885245,16.0655737704918,13.442622950819676,18.114754098360653,12.295081967213116,10.40983606557377,
CBDRX	chr9	NonIntact	helitron	17.377049180327866,19.344262295081965,17.1311475409836,13.278688524590166,19.262295081967213,7.213114754098358,18.852459016393443,3.2786885245901667,20.655737704918035,16.147540983606554,19.344262295081965,15.409836065573767,8.442622950819672,20.163934426
CBDRX	chr9	NonIntact	Gypsy_LTR_retrotransposon	19.01639344262295,19.01639344262295,10.901639344262296,6.885245901639341,16.0655737704918,5.000000000000004,12.37704918032787,16.393442622950815,17.45901639344262,18.442622950819672,13.114754098360658,12.54098360655738,12.786885245901642,5.819672131147537
CBDRX	chr9	NonIntact	Tc1_Mariner_TIR_transposon	24.180327868852462,15.819672131147538,7.459016393442621,13.852459016393446,11.80327868852459,16.72131147540983,18.196721311475407,13.36065573770492,17.45901639344262,22.459016393442624,14.262295081967215,19.508196721311474,20.901639344262293,20.983606557377048,17.1311475409836,9.836065573770492,19.0983606557377,20.655737704918035,20.0,12.295081967213116,10.40983606557377,21.311475409836063,11.065…
CBDRX	chrX	NonIntact	Mutator_TIR_transposon	15.245901639344268,14.91803278688525,18.196721311475407,14.91803278688525,11.885245901639346,12.131147540983608,14.754098360655743,10.819672131147541,16.967213114754095,14.180327868852462,4.50819672131148,20.163934426229506,13.032786885245905,17.295081967
CBDRX	chrX	NonIntact	helitron	21.311475409836063,16.72131147540983,12.37704918032787,15.819672131147538,20.0,20.983606557377048,22.049180327868854,17.21311475409836,14.344262295081972,21.147540983606557,11.721311475409838,12.213114754098363,13.688524590163937,19.344262295081965,18.524
CBDRX	chrX	NonIntact	PIF_Harbinger_TIR_transposon	20.245901639344265,17.86885245901639,17.21311475409836,13.852459016393446,13.114754098360658,13.606557377049183,18.196721311475407,16.393442622950815,17.29508196721311,21.393442622950822,20.491803278688526,14.754098360655743,15.409836065573767,18.524590163934423,18.442622950819672,19.344262295081965,11.311475409836067,24.262295081967217,14.262295081967215,15.327868852459021,16.967213114754095,17.…
CBDRX	chrX	NonIntact	CACTA_TIR_transposon	14.836065573770496,15.163934426229511,10.327868852459018,17.45901639344262,14.180327868852462,20.245901639344265,5.000000000000004,2.1311475409836085,4.180327868852463,20.901639344262293,15.163934426229511,19.42622950819672,21.639344262295083,17.213114754
CBDRX	chrX	NonIntact	hAT_TIR_transposon	15.737704918032781,10.98360655737705,4.262295081967217,15.819672131147538,4.50819672131148,15.409836065573767,18.0327868852459,11.39344262295082,15.983606557377046,16.63934426229508,17.29508196721311,5.901639344262291,11.557377049180328,16.31147540983606,
CBDRX	chrX	NonIntact	LTR_retrotransposon	4.8360655737704965,8.278688524590162,15.901639344262291,9.344262295081966,16.0655737704918,22.622950819672134,14.344262295081972,16.147540983606554,9.508196721311474,10.0,0.9016393442622959,17.1311475409836,20.491803278688526,14.754098360655743,13.8524590
CBDRX	chrX	NonIntact	Copia_LTR_retrotransposon	3.4426229508196755,6.967213114754096,17.62295081967213,6.721311475409832,8.524590163934425,7.9508196721311455,18.0327868852459,12.786885245901642,7.786885245901637,2.377049180327871,7.131147540983603,6.4754098360655705,5.409836065573766,4.426229508196726,
CBDRX	chrX	NonIntact	Gypsy_LTR_retrotransposon	22.70491803278689,18.196721311475407,10.163934426229508,6.5573770491803245,12.131147540983608,12.131147540983608,4.8360655737704965,11.147540983606559,19.754098360655735,20.491803278688526,12.049180327868855,10.491803278688524,19.59016393442623,14.0163934
CBDRX	chrX	NonIntact	Tc1_Mariner_TIR_transposon	19.42622950819672,18.688524590163933,18.524590163934423,18.196721311475407,17.1311475409836,17.704918032786882,15.737704918032781,15.737704918032781,22.70491803278689,15.983606557377046,18.934426229508194,19.508196721311474,18.278688524590162,18.360655737704917,12.622950819672134,11.147540983606559,13.524590163934429,10.40983606557377,13.196721311475413,14.836065573770496,16.885245901639344,18.68…
CBIO2	chr1	NonIntact	LTR_retrotransposon	10.737704918032788,2.1311475409836085,2.8688524590163964,5.245901639344258,14.344262295081972,12.37704918032787,14.836065573770496,12.786885245901642,20.983606557377048,22.295081967213118,20.655737704918035,14.91803278688525,12.37704918032787,6.0655737704
CBIO2	chr1	NonIntact	Copia_LTR_retrotransposon	14.754098360655743,4.9180327868852505,8.934426229508196,3.2786885245901667,22.37704918032787,4.426229508196726,1.3114754098360666,6.721311475409832,16.22950819672131,4.590163934426233,4.016393442622954,4.262295081967217,11.311475409836067,6.80327868852458
CBIO2	chr1	NonIntact	CACTA_TIR_transposon	19.83606557377049,13.442622950819676,17.1311475409836,17.45901639344262,17.786885245901637,17.540983606557372,19.344262295081965,17.704918032786882,20.0,22.131147540983605,17.704918032786882,17.704918032786882,19.59016393442623,5.49180327868852,19.5901639
CBIO2	chr1	NonIntact	Gypsy_LTR_retrotransposon	6.065573770491799,10.98360655737705,16.557377049180324,19.01639344262295,22.622950819672134,15.901639344262291,18.524590163934423,19.754098360655735,22.213114754098363,11.065573770491802,21.311475409836063,2.786885245901642,5.327868852459011,17.2950819672
CBIO2	chr1	NonIntact	Mutator_TIR_transposon	15.655737704918028,6.721311475409832,15.737704918032781,11.557377049180328,21.311475409836063,21.229508196721312,17.704918032786882,7.04918032786885,8.688524590163933,3.7704918032786923,6.065573770491799,14.590163934426233,19.0983606557377,20.163934426229
CBIO2	chr1	NonIntact	hAT_TIR_transposon	20.245901639344265,19.918032786885245,18.196721311475407,21.639344262295083,4.590163934426233,3.2786885245901667,2.95081967213115,5.000000000000004,18.360655737704917,7.9508196721311455,16.393442622950815,6.5573770491803245,14.426229508196725,12.540983606
CBIO2	chr1	NonIntact	helitron	13.770491803278691,21.147540983606557,13.196721311475413,8.852459016393441,21.557377049180328,18.934426229508194,23.36065573770492,14.016393442622954,9.180327868852459,7.295081967213112,15.983606557377046,21.803278688524593,14.344262295081972,13.934426229
CBIO2	chr1	NonIntact	Tc1_Mariner_TIR_transposon	11.39344262295082,19.918032786885245,20.491803278688526,10.98360655737705,14.754098360655743,18.442622950819672,10.655737704918032,10.163934426229508,11.639344262295085,14.754098360655743,18.442622950819672,15.901639344262291,17.1311475409836,23.77049180327869,20.901639344262293,22.868852459016395,19.754098360655735,20.491803278688526,12.54098360655738,11.721311475409838,24.262295081967217,12.540…
CBIO2	chr1	NonIntact	PIF_Harbinger_TIR_transposon	13.770491803278691,13.770491803278691,22.868852459016395,10.081967213114753,20.40983606557377,20.0,19.918032786885245,20.737704918032787,23.934426229508198,22.213114754098363,16.72131147540983,7.459016393442621,24.34426229508197,17.704918032786882,15.9016
CBIO2	chr2	NonIntact	Mutator_TIR_transposon	14.426229508196725,7.704918032786884,7.868852459016391,8.852459016393441,17.540983606557372,21.229508196721312,17.704918032786882,20.81967213114754,8.852459016393441,11.475409836065575,5.081967213114759,22.049180327868854,9.01639344262295,2.54098360655737
CBIO2	chr2	NonIntact	Tc1_Mariner_TIR_transposon	12.049180327868855,11.80327868852459,13.278688524590166,11.639344262295085,11.311475409836067,20.491803278688526,21.147540983606557,15.245901639344268,13.278688524590166,23.852459016393446,18.524590163934423,20.81967213114754,22.622950819672134,16.803278688524586,15.49180327868852,15.49180327868852,15.49180327868852,17.29508196721311,17.29508196721311,18.196721311475407,14.098360655737707,15.5737…
CBIO2	chr2	NonIntact	Copia_LTR_retrotransposon	12.704918032786887,10.573770491803279,7.704918032786884,21.9672131147541,22.70491803278689,5.819672131147537,11.721311475409838,10.163934426229508,19.01639344262295,11.147540983606559,10.163934426229508,13.442622950819676,22.295081967213118,24.09836065573
CBIO2	chr2	NonIntact	Gypsy_LTR_retrotransposon	18.688524590163933,17.62295081967213,4.9180327868852505,22.295081967213118,19.754098360655735,7.9508196721311455,6.311475409836063,5.49180327868852,5.327868852459011,11.147540983606559,20.081967213114755,12.95081967213115,16.22950819672131,16.475409836065
CBIO2	chr2	NonIntact	PIF_Harbinger_TIR_transposon	12.95081967213115,11.147540983606559,6.721311475409832,17.29508196721311,18.606557377049178,20.40983606557377,8.0327868852459,21.147540983606557,17.950819672131143,12.54098360655738,22.78688524590164,8.278688524590162,11.065573770491802,18.196721311475407,15.901639344262291,18.934426229508194,20.491803278688526,20.245901639344265,20.655737704918035,19.754098360655735,18.934426229508194,24.0983606…
CBIO2	chr2	NonIntact	LTR_retrotransposon	12.786885245901642,13.442622950819676,14.672131147540988,14.426229508196725,10.819672131147541,18.360655737704917,14.836065573770496,3.7704918032786923,19.0983606557377,12.049180327868855,20.655737704918035,9.426229508196721,21.9672131147541,20.0819672131
CBIO2	chr2	NonIntact	CACTA_TIR_transposon	15.573770491803273,15.081967213114758,18.770491803278688,20.40983606557377,15.081967213114758,18.770491803278688,20.40983606557377,21.147540983606557,21.885245901639347,8.60655737704918,16.967213114754095,11.639344262295085,15.000000000000004,16.147540983
CBIO2	chr2	NonIntact	helitron	17.04918032786885,14.262295081967215,23.524590163934427,19.01639344262295,18.278688524590162,13.442622950819676,9.508196721311474,18.524590163934423,15.000000000000004,22.049180327868854,18.360655737704917,10.901639344262296,14.836065573770496,18.27868852
CBIO2	chr2	NonIntact	hAT_TIR_transposon	14.016393442622954,17.45901639344262,13.606557377049183,11.229508196721312,22.459016393442624,24.016393442622952,8.770491803278686,14.672131147540988,17.377049180327866,16.72131147540983,14.098360655737707,11.147540983606559,9.180327868852459,10.327868852
CBIO2	chr3	NonIntact	Tc1_Mariner_TIR_transposon	11.39344262295082,18.442622950819672,17.04918032786885,17.29508196721311,20.491803278688526,15.49180327868852,21.803278688524593,16.0655737704918,16.967213114754095,20.983606557377048,16.31147540983606,9.344262295081966,14.426229508196725,16.72131147540983,11.39344262295082,18.524590163934423,19.42622950819672,2.1311475409836085,14.016393442622954,3.7704918032786923,8.196721311475407,2.6229508196…
CBIO2	chr3	NonIntact	helitron	17.950819672131143,19.01639344262295,15.245901639344268,14.262295081967215,22.131147540983605,16.885245901639344,17.540983606557372,5.409836065573766,17.704918032786882,18.524590163934423,19.262295081967213,21.721311475409834,16.72131147540983,11.47540983
CBIO2	chr3	NonIntact	LTR_retrotransposon	13.114754098360658,14.262295081967215,14.016393442622954,10.0,9.672131147540982,13.688524590163937,17.29508196721311,14.590163934426233,18.114754098360653,19.42622950819672,11.475409836065575,16.31147540983606,19.01639344262295,11.721311475409838,15.65573
CBIO2	chr3	NonIntact	hAT_TIR_transposon	9.672131147540982,13.442622950819676,11.065573770491802,16.63934426229508,10.655737704918032,10.163934426229508,22.95081967213115,17.86885245901639,14.180327868852462,19.344262295081965,19.42622950819672,20.0,6.885245901639341,13.688524590163937,11.065573
CBIO2	chr3	NonIntact	Mutator_TIR_transposon	10.819672131147541,16.47540983606557,22.213114754098363,19.262295081967213,20.163934426229506,19.754098360655735,19.42622950819672,20.655737704918035,17.21311475409836,7.540983606557375,19.83606557377049,15.655737704918028,21.311475409836063,12.2950819672
CBIO2	chr3	NonIntact	Copia_LTR_retrotransposon	16.803278688524586,19.262295081967213,16.31147540983606,20.40983606557377,13.852459016393446,10.819672131147541,7.868852459016391,20.983606557377048,13.688524590163937,15.000000000000004,16.63934426229508,19.344262295081965,21.147540983606557,13.770491803
CBIO2	chr3	NonIntact	Gypsy_LTR_retrotransposon	12.131147540983608,5.573770491803274,1.475409836065575,13.606557377049183,6.4754098360655705,10.081967213114753,20.081967213114755,20.491803278688526,18.196721311475407,21.311475409836063,16.22950819672131,7.131147540983603,8.360655737704915,1.80327868852
CBIO2	chr3	NonIntact	CACTA_TIR_transposon	21.065573770491806,22.54098360655738,19.918032786885245,8.688524590163933,4.672131147540988,4.344262295081971,5.081967213114759,16.803278688524586,14.344262295081972,14.50819672131148,21.065573770491806,22.70491803278689,20.983606557377048,8.6885245901639
CBIO2	chr3	NonIntact	PIF_Harbinger_TIR_transposon	18.360655737704917,23.524590163934427,19.0983606557377,24.426229508196727,18.606557377049178,15.49180327868852,19.59016393442623,23.852459016393446,18.688524590163933,15.245901639344268,16.967213114754095,17.86885245901639,16.63934426229508,12.622950819672134,16.885245901639344,19.01639344262295,16.557377049180324,16.803278688524586,17.950819672131143,22.213114754098363,12.868852459016395,18.6065…
CBIO2	chr4	NonIntact	Tc1_Mariner_TIR_transposon	11.311475409836067,17.04918032786885,10.901639344262296,19.344262295081965,12.622950819672134,16.22950819672131,18.934426229508194,17.1311475409836,17.377049180327866,18.852459016393443,14.50819672131148,14.262295081967215,15.327868852459021,20.81967213114754,11.147540983606559,12.95081967213115,14.590163934426233,14.91803278688525,22.459016393442624,15.573770491803273,22.131147540983605,19.67213…
CBIO2	chr4	NonIntact	CACTA_TIR_transposon	15.081967213114758,9.426229508196721,20.737704918032787,18.770491803278688,16.147540983606554,6.803278688524587,6.311475409836063,5.1639344262295035,14.180327868852462,11.885245901639346,3.0327868852459043,9.344262295081966,23.36065573770492,18.5245901639
CBIO2	chr4	NonIntact	hAT_TIR_transposon	9.918032786885245,16.22950819672131,18.442622950819672,14.344262295081972,15.983606557377046,15.245901639344268,18.196721311475407,16.72131147540983,5.1639344262295035,10.573770491803279,12.295081967213116,18.0327868852459,14.262295081967215,18.6065573770
CBIO2	chr4	NonIntact	LTR_retrotransposon	8.360655737704915,16.557377049180324,4.754098360655742,13.524590163934429,20.0,13.770491803278691,13.442622950819676,11.885245901639346,15.901639344262291,16.63934426229508,13.852459016393446,9.754098360655737,8.770491803278686,18.934426229508194,4.098360
CBIO2	chr4	NonIntact	Mutator_TIR_transposon	13.032786885245905,19.918032786885245,16.31147540983606,18.114754098360653,14.426229508196725,18.114754098360653,19.59016393442623,17.950819672131143,21.229508196721312,6.147540983606554,18.688524590163933,14.016393442622954,13.606557377049183,18.03278688
CBIO2	chr4	NonIntact	PIF_Harbinger_TIR_transposon	19.83606557377049,15.409836065573767,19.0983606557377,11.639344262295085,7.704918032786884,20.491803278688526,9.836065573770492,13.606557377049183,19.0983606557377,22.295081967213118,15.983606557377046,6.885245901639341,21.393442622950822,5.409836065573766,7.704918032786884,20.327868852459016,23.27868852459017,12.37704918032787,13.852459016393446,13.524590163934429,16.31147540983606,24.1803278688…
CBIO2	chr4	NonIntact	helitron	11.885245901639346,3.9344262295082,19.344262295081965,19.18032786885246,4.9180327868852505,16.31147540983606,8.0327868852459,3.4426229508196755,0.6557377049180333,2.786885245901642,18.0327868852459,19.42622950819672,14.262295081967215,8.114754098360654,15
CBIO2	chr4	NonIntact	Copia_LTR_retrotransposon	18.0327868852459,4.8360655737704965,20.655737704918035,14.262295081967215,18.278688524590162,0.6557377049180333,3.360655737704921,21.311475409836063,15.000000000000004,14.344262295081972,9.59016393442623,18.852459016393443,16.63934426229508,12.37704918032
CBIO2	chr4	NonIntact	Gypsy_LTR_retrotransposon	13.36065573770492,0.9016393442622959,0.40983606557377084,12.868852459016395,12.37704918032787,4.180327868852463,9.754098360655737,14.344262295081972,2.622950819672133,2.2950819672131164,5.901639344262291,15.081967213114758,9.59016393442623,15.573770491803
CBIO2	chr5	NonIntact	Tc1_Mariner_TIR_transposon	10.737704918032788,13.36065573770492,20.81967213114754,14.672131147540988,23.68852459016394,12.95081967213115,8.934426229508196,11.885245901639346,14.344262295081972,22.78688524590164,10.655737704918032,20.81967213114754,14.672131147540988,23.68852459016394,11.639344262295085,19.59016393442623,14.344262295081972,22.78688524590164,12.295081967213116,15.983606557377046,20.81967213114754,18.19672131…
CBIO2	chr5	NonIntact	Mutator_TIR_transposon	17.377049180327866,19.754098360655735,17.04918032786885,13.688524590163937,16.22950819672131,9.344262295081966,14.426229508196725,15.409836065573767,13.032786885245905,16.63934426229508,15.327868852459021,4.180327868852463,15.573770491803273,14.7540983606
CBIO2	chr5	NonIntact	CACTA_TIR_transposon	21.9672131147541,22.049180327868854,19.83606557377049,9.918032786885245,11.475409836065575,23.442622950819676,21.9672131147541,14.098360655737707,11.311475409836067,14.672131147540988,17.786885245901637,16.147540983606554,13.114754098360658,21.06557377049
CBIO2	chr5	NonIntact	PIF_Harbinger_TIR_transposon	22.54098360655738,12.37704918032787,11.065573770491802,21.229508196721312,14.016393442622954,18.524590163934423,19.508196721311474,10.491803278688524,14.344262295081972,5.081967213114759,2.95081967213115,10.655737704918032,13.524590163934429,9.672131147540982,14.016393442622954,11.147540983606559,21.065573770491806,23.36065573770492,16.31147540983606,20.81967213114754,10.901639344262296,4.9180327…
CBIO2	chr5	NonIntact	LTR_retrotransposon	21.229508196721312,19.754098360655735,15.819672131147538,8.524590163934425,11.311475409836067,19.754098360655735,17.04918032786885,13.688524590163937,11.311475409836067,5.737704918032783,11.311475409836067,23.68852459016394,9.426229508196721,14.0983606557
CBIO2	chr5	NonIntact	Gypsy_LTR_retrotransposon	20.163934426229506,4.590163934426233,3.2786885245901667,9.180327868852459,20.737704918032787,21.9672131147541,14.590163934426233,17.21311475409836,7.213114754098358,20.491803278688526,23.114754098360656,12.459016393442624,20.901639344262293,24.50819672131
CBIO2	chr5	NonIntact	helitron	21.147540983606557,15.409836065573767,18.770491803278688,21.475409836065577,17.86885245901639,12.54098360655738,14.754098360655743,16.147540983606554,18.0327868852459,19.508196721311474,15.49180327868852,23.442622950819676,14.590163934426233,9.34426229508
CBIO2	chr5	NonIntact	Copia_LTR_retrotransposon	9.01639344262295,14.262295081967215,11.147540983606559,2.786885245901642,15.901639344262291,22.459016393442624,11.967213114754099,7.868852459016391,10.98360655737705,16.47540983606557,14.098360655737707,10.163934426229508,24.09836065573771,0.5737704918032
CBIO2	chr5	NonIntact	hAT_TIR_transposon	11.065573770491802,13.524590163934429,17.540983606557372,20.163934426229506,20.0,17.540983606557372,6.393442622950817,3.852459016393446,16.22950819672131,18.278688524590162,22.213114754098363,5.1639344262295035,20.737704918032787,12.295081967213116,19.754
CBIO2	chr6	NonIntact	Tc1_Mariner_TIR_transposon	11.885245901639346,11.065573770491802,10.819672131147541,8.688524590163933,18.278688524590162,13.36065573770492,10.573770491803279,10.163934426229508,18.442622950819672,16.147540983606554,17.29508196721311,11.475409836065575,11.721311475409838,11.885245901639346,11.80327868852459,12.622950819672134,11.80327868852459,11.39344262295082,8.688524590163933,19.262295081967213,12.622950819672134,14.6721…
CBIO2	chr6	NonIntact	LTR_retrotransposon	3.0327868852459043,3.1967213114754123,6.393442622950817,18.606557377049178,9.836065573770492,6.311475409836063,11.475409836065575,9.098360655737704,1.6393442622950833,0.5737704918032791,7.377049180327866,18.524590163934423,14.50819672131148,3.934426229508
CBIO2	chr6	NonIntact	CACTA_TIR_transposon	19.672131147540984,21.065573770491806,19.754098360655735,20.737704918032787,4.426229508196726,19.59016393442623,2.5409836065573796,0.6557377049180333,7.213114754098358,7.622950819672129,12.131147540983608,18.934426229508194,7.295081967213112,19.3442622950
CBIO2	chr6	NonIntact	Gypsy_LTR_retrotransposon	16.72131147540983,5.573770491803274,6.229508196721308,17.1311475409836,12.704918032786887,18.852459016393443,15.49180327868852,20.245901639344265,17.29508196721311,5.573770491803274,6.229508196721308,17.1311475409836,4.016393442622954,1.7213114754098378,0
CBIO2	chr6	NonIntact	Mutator_TIR_transposon	9.01639344262295,11.80327868852459,17.540983606557372,16.31147540983606,12.704918032786887,19.59016393442623,10.737704918032788,7.540983606557375,10.819672131147541,20.901639344262293,21.393442622950822,21.229508196721312,5.245901639344258,6.8032786885245
CBIO2	chr6	NonIntact	Copia_LTR_retrotransposon	6.393442622950817,3.4426229508196755,3.7704918032786923,4.098360655737708,7.540983606557375,3.6065573770491834,17.04918032786885,17.45901639344262,8.278688524590162,22.213114754098363,15.655737704918028,16.885245901639344,17.950819672131143,22.86885245901
CBIO2	chr6	NonIntact	helitron	14.91803278688525,5.573770491803274,20.081967213114755,22.868852459016395,19.0983606557377,16.72131147540983,22.37704918032787,17.1311475409836,15.081967213114758,19.754098360655735,16.22950819672131,11.311475409836067,20.327868852459016,15.49180327868852
CBIO2	chr6	NonIntact	hAT_TIR_transposon	9.508196721311474,6.311475409836063,11.475409836065575,13.032786885245905,17.21311475409836,16.22950819672131,7.377049180327866,6.229508196721308,16.967213114754095,11.475409836065575,7.9508196721311455,11.721311475409838,17.377049180327866,16.22950819672
CBIO2	chr6	NonIntact	PIF_Harbinger_TIR_transposon	11.80327868852459,14.672131147540988,7.786885245901637,1.475409836065575,19.508196721311474,9.098360655737704,24.426229508196727,18.606557377049178,14.180327868852462,13.524590163934429,9.344262295081966,1.475409836065575,19.344262295081965,12.295081967213116,19.01639344262295,24.426229508196727,19.508196721311474,11.639344262295085,23.68852459016394,14.590163934426233,16.47540983606557,16.147540…
CBIO2	chr7	NonIntact	Tc1_Mariner_TIR_transposon	11.639344262295085,20.081967213114755,14.91803278688525,16.72131147540983,14.91803278688525,15.901639344262291,14.426229508196725,15.573770491803273,16.393442622950815,15.573770491803273,13.606557377049183,11.065573770491802,10.573770491803279,17.86885245901639,19.0983606557377,19.672131147540984,15.000000000000004,15.573770491803273,16.967213114754095,16.72131147540983,17.62295081967213,14.91803…
CBIO2	chr7	NonIntact	Gypsy_LTR_retrotransposon	13.524590163934429,5.983606557377045,22.54098360655738,20.655737704918035,3.852459016393446,0.9016393442622959,9.426229508196721,10.98360655737705,17.86885245901639,9.426229508196721,19.42622950819672,0.491803278688525,10.573770491803279,14.09836065573770
CBIO2	chr7	NonIntact	Mutator_TIR_transposon	15.819672131147538,18.934426229508194,22.37704918032787,23.77049180327869,23.852459016393446,23.934426229508198,20.327868852459016,21.065573770491806,20.655737704918035,23.19672131147541,12.54098360655738,21.229508196721312,20.655737704918035,12.295081967
CBIO2	chr7	NonIntact	LTR_retrotransposon	13.442622950819676,8.770491803278686,9.59016393442623,7.131147540983603,6.311475409836063,5.901639344262291,7.377049180327866,7.540983606557375,7.459016393442621,8.0327868852459,9.836065573770492,7.377049180327866,5.901639344262291,7.459016393442621,6.639
CBIO2	chr7	NonIntact	hAT_TIR_transposon	16.47540983606557,16.47540983606557,4.590163934426233,2.4590163934426252,13.688524590163937,10.40983606557377,6.229508196721308,15.655737704918028,5.819672131147537,0.6557377049180333,1.7213114754098378,4.344262295081971,13.032786885245905,15.983606557377
CBIO2	chr7	NonIntact	Copia_LTR_retrotransposon	19.18032786885246,9.426229508196721,11.80327868852459,8.442622950819672,15.573770491803273,20.983606557377048,23.442622950819676,16.885245901639344,18.524590163934423,15.49180327868852,18.442622950819672,15.901639344262291,19.0983606557377,14.918032786885
CBIO2	chr7	NonIntact	PIF_Harbinger_TIR_transposon	17.21311475409836,20.737704918032787,20.40983606557377,11.639344262295085,16.393442622950815,17.786885245901637,10.819672131147541,14.344262295081972,9.59016393442623,15.655737704918028,15.327868852459021,18.360655737704917,8.442622950819672,11.3934426229
CBIO2	chr7	NonIntact	helitron	17.377049180327866,23.524590163934427,19.262295081967213,18.114754098360653,12.459016393442624,5.327868852459011,0.98360655737705,0.16393442622950832,1.0655737704918042,17.45901639344262,0.9016393442622959,2.377049180327871,15.737704918032781,16.475409836
CBIO2	chr7	NonIntact	CACTA_TIR_transposon	20.737704918032787,10.819672131147541,16.967213114754095,20.491803278688526,10.573770491803279,9.836065573770492,9.426229508196721,9.180327868852459,20.40983606557377,12.295081967213116,10.819672131147541,12.786885245901642,13.196721311475413,16.557377049
CBIO2	chr8	NonIntact	Gypsy_LTR_retrotransposon	10.40983606557377,12.704918032786887,21.803278688524593,9.098360655737704,7.540983606557375,11.39344262295082,11.39344262295082,7.131147540983603,7.868852459016391,3.7704918032786923,14.50819672131148,3.688524590163938,9.426229508196721,13.770491803278691
CBIO2	chr8	NonIntact	LTR_retrotransposon	20.573770491803277,3.524590163934429,4.9180327868852505,14.672131147540988,19.18032786885246,3.9344262295082,6.393442622950817,14.098360655737707,18.278688524590162,8.442622950819672,2.7049180327868876,3.360655737704921,12.37704918032787,4.098360655737708
CBIO2	chr8	NonIntact	Mutator_TIR_transposon	12.131147540983608,8.0327868852459,12.622950819672134,17.950819672131143,20.40983606557377,15.49180327868852,1.9672131147541,5.737704918032783,5.081967213114759,9.754098360655737,20.901639344262293,20.327868852459016,15.737704918032781,13.606557377049183,
CBIO2	chr8	NonIntact	Copia_LTR_retrotransposon	6.803278688524587,10.491803278688524,10.655737704918032,8.852459016393441,6.393442622950817,11.80327868852459,9.426229508196721,8.442622950819672,9.59016393442623,9.59016393442623,13.606557377049183,9.180327868852459,3.524590163934429,3.688524590163938,5.
CBIO2	chr8	NonIntact	CACTA_TIR_transposon	14.180327868852462,18.934426229508194,15.901639344262291,16.967213114754095,16.147540983606554,19.672131147540984,17.29508196721311,20.0,17.704918032786882,16.47540983606557,13.606557377049183,13.606557377049183,19.18032786885246,15.983606557377046,15.409
CBIO2	chr8	NonIntact	hAT_TIR_transposon	6.065573770491799,17.1311475409836,14.344262295081972,11.39344262295082,18.114754098360653,15.573770491803273,12.131147540983608,15.983606557377046,16.22950819672131,9.59016393442623,12.049180327868855,15.327868852459021,5.000000000000004,15.8196721311475
CBIO2	chr8	NonIntact	Tc1_Mariner_TIR_transposon	21.065573770491806,18.360655737704917,14.016393442622954,14.016393442622954,23.36065573770492,15.737704918032781,12.131147540983608,11.229508196721312,13.442622950819676,12.459016393442624,15.983606557377046,14.180327868852462,19.0983606557377,15.983606557377046,17.86885245901639,12.95081967213115,11.80327868852459,11.065573770491802,10.0,11.147540983606559,23.68852459016394,15.49180327868852,13.…
CBIO2	chr8	NonIntact	helitron	12.37704918032787,13.852459016393446,21.721311475409834,12.295081967213116,17.86885245901639,9.262295081967212,7.622950819672129,21.065573770491806,23.60655737704918,2.049180327868854,12.95081967213115,8.688524590163933,19.344262295081965,22.8688524590163
CBIO2	chr8	NonIntact	PIF_Harbinger_TIR_transposon	15.245901639344268,15.573770491803273,10.40983606557377,19.672131147540984,18.770491803278688,17.62295081967213,15.000000000000004,16.967213114754095,12.131147540983608,13.770491803278691,16.393442622950815,17.540983606557372,20.40983606557377,11.721311475409838,16.885245901639344,23.934426229508198,17.540983606557372,9.836065573770492,11.147540983606559,10.327868852459018,8.442622950819672,9.344…
CBIO2	chr9	NonIntact	hAT_TIR_transposon	14.262295081967215,9.01639344262295,16.63934426229508,18.0327868852459,15.819672131147538,17.62295081967213,17.29508196721311,10.819672131147541,5.737704918032783,9.180327868852459,20.573770491803277,20.327868852459016,19.672131147540984,16.55737704918032
CBIO2	chr9	NonIntact	helitron	17.45901639344262,22.868852459016395,20.081967213114755,19.0983606557377,15.409836065573767,13.196721311475413,3.7704918032786923,3.1967213114754123,18.278688524590162,11.639344262295085,24.426229508196727,23.524590163934427,19.01639344262295,15.573770491
CBIO2	chr9	NonIntact	Mutator_TIR_transposon	3.6065573770491834,16.31147540983606,10.245901639344263,11.147540983606559,7.295081967213112,13.770491803278691,14.098360655737707,14.344262295081972,5.081967213114759,20.163934426229506,18.0327868852459,14.590163934426233,19.672131147540984,18.3606557377
CBIO2	chr9	NonIntact	LTR_retrotransposon	6.885245901639341,14.836065573770496,3.4426229508196755,9.59016393442623,18.770491803278688,2.5409836065573796,3.688524590163938,2.786885245901642,3.4426229508196755,4.754098360655742,4.180327868852463,6.065573770491799,9.754098360655737,7.868852459016391
CBIO2	chr9	NonIntact	Copia_LTR_retrotransposon	19.01639344262295,16.885245901639344,17.950819672131143,5.245901639344258,5.573770491803274,5.245901639344258,3.2786885245901667,2.4590163934426252,13.770491803278691,6.229508196721308,12.37704918032787,12.213114754098363,4.098360655737708,15.327868852459
CBIO2	chr9	NonIntact	CACTA_TIR_transposon	10.737704918032788,16.63934426229508,10.327868852459018,9.01639344262295,11.39344262295082,17.45901639344262,21.721311475409834,11.557377049180328,11.967213114754099,10.081967213114753,7.622950819672129,9.918032786885245,16.0655737704918,13.68852459016393
CBIO2	chr9	NonIntact	Gypsy_LTR_retrotransposon	4.180327868852463,3.1967213114754123,1.7213114754098378,2.2950819672131164,3.688524590163938,12.704918032786887,14.426229508196725,5.000000000000004,13.770491803278691,18.770491803278688,11.475409836065575,6.393442622950817,2.5409836065573796,2.8688524590
CBIO2	chr9	NonIntact	PIF_Harbinger_TIR_transposon	14.426229508196725,24.262295081967217,20.655737704918035,16.803278688524586,21.803278688524593,13.852459016393446,19.508196721311474,19.0983606557377,14.098360655737707,21.557377049180328,13.770491803278691,23.60655737704918,20.655737704918035,21.9672131147541,19.262295081967213,15.819672131147538,21.803278688524593,14.754098360655743,17.1311475409836,18.688524590163933,22.213114754098363,20.5737…
CBIO2	chr9	NonIntact	Tc1_Mariner_TIR_transposon	18.442622950819672,1.3114754098360666,13.688524590163937,13.770491803278691,18.524590163934423,16.967213114754095,13.934426229508201,17.540983606557372,16.803278688524586,15.245901639344268,13.36065573770492,19.18032786885246,14.262295081967215,19.262295081967213,14.180327868852462,14.836065573770496,15.655737704918028,16.885245901639344,13.934426229508201,18.852459016393443,17.29508196721311,17.…
CBIO2	chrX	NonIntact	Tc1_Mariner_TIR_transposon	10.491803278688524,14.91803278688525,17.704918032786882,12.622950819672134,16.557377049180324,18.0327868852459,16.0655737704918,17.04918032786885,18.114754098360653,18.442622950819672,15.49180327868852,24.590163934426233,24.09836065573771,16.72131147540983,18.278688524590162,19.83606557377049,17.377049180327866,15.983606557377046,18.442622950819672,14.50819672131148,17.540983606557372,23.68852459…
CBIO2	chrX	NonIntact	CACTA_TIR_transposon	15.737704918032781,21.229508196721312,16.803278688524586,16.47540983606557,14.754098360655743,17.04918032786885,14.344262295081972,18.688524590163933,20.491803278688526,20.245901639344265,14.262295081967215,12.049180327868855,15.737704918032781,17.2131147
CBIO2	chrX	NonIntact	Copia_LTR_retrotransposon	12.295081967213116,6.065573770491799,10.573770491803279,22.54098360655738,4.344262295081971,18.360655737704917,8.360655737704915,11.557377049180328,3.2786885245901667,6.229508196721308,13.36065573770492,17.29508196721311,9.01639344262295,8.524590163934425
CBIO2	chrX	NonIntact	hAT_TIR_transposon	19.262295081967213,8.278688524590162,5.737704918032783,14.180327868852462,16.22950819672131,18.524590163934423,13.688524590163937,15.163934426229511,11.80327868852459,12.868852459016395,13.688524590163937,23.032786885245905,13.114754098360658,18.606557377
CBIO2	chrX	NonIntact	Gypsy_LTR_retrotransposon	15.081967213114758,7.868852459016391,5.983606557377045,15.163934426229511,5.573770491803274,17.377049180327866,22.868852459016395,19.754098360655735,10.98360655737705,9.754098360655737,0.7377049180327875,8.442622950819672,8.688524590163933,0.9016393442622
CBIO2	chrX	NonIntact	LTR_retrotransposon	9.01639344262295,16.22950819672131,14.754098360655743,16.22950819672131,19.59016393442623,7.704918032786884,22.295081967213118,15.573770491803273,16.0655737704918,5.000000000000004,10.655737704918032,9.01639344262295,9.098360655737704,1.6393442622950833,1
CBIO2	chrX	NonIntact	Mutator_TIR_transposon	15.000000000000004,7.04918032786885,15.245901639344268,17.62295081967213,15.573770491803273,11.80327868852459,3.1967213114754123,13.196721311475413,9.59016393442623,11.967213114754099,24.262295081967217,14.426229508196725,14.426229508196725,19.01639344262
CBIO2	chrX	NonIntact	PIF_Harbinger_TIR_transposon	19.01639344262295,17.04918032786885,0.0,18.606557377049178,16.22950819672131,20.491803278688526,22.459016393442624,18.852459016393443,18.770491803278688,23.442622950819676,12.049180327868855,0.0,10.655737704918032,20.327868852459016,21.393442622950822,16.
CBIO2	chrX	NonIntact	helitron	20.081967213114755,15.819672131147538,11.80327868852459,19.672131147540984,15.409836065573767,14.426229508196725,13.114754098360658,10.737704918032788,12.213114754098363,19.672131147540984,12.459016393442624,5.409836065573766,17.950819672131143,10.4098360
COFBa	chr1	NonIntact	helitron	10.0,16.0655737704918,16.0655737704918,16.72131147540983,16.72131147540983,18.0327868852459,15.49180327868852,10.491803278688524,13.278688524590166,6.803278688524587,5.081967213114759,5.49180327868852,5.983606557377045,21.803278688524593,9.098360655737704
COFBa	chr1	NonIntact	Mutator_TIR_transposon	5.983606557377045,16.0655737704918,3.360655737704921,19.01639344262295,13.606557377049183,15.819672131147538,15.245901639344268,9.59016393442623,5.000000000000004,14.590163934426233,23.77049180327869,10.245901639344263,18.770491803278688,12.21311475409836
COFBa	chr1	NonIntact	Copia_LTR_retrotransposon	9.672131147540982,6.6393442622950785,6.5573770491803245,8.196721311475407,15.245901639344268,16.885245901639344,16.885245901639344,4.016393442622954,10.163934426229508,8.278688524590162,5.737704918032783,10.327868852459018,8.0327868852459,10.2459016393442
COFBa	chr1	NonIntact	hAT_TIR_transposon	15.49180327868852,10.573770491803279,23.68852459016394,10.491803278688524,12.786885245901642,14.016393442622954,20.983606557377048,18.278688524590162,6.6393442622950785,13.770491803278691,20.983606557377048,14.344262295081972,3.524590163934429,14.18032786
COFBa	chr1	NonIntact	LTR_retrotransposon	10.737704918032788,5.655737704918029,5.245901639344258,3.4426229508196755,7.704918032786884,13.934426229508201,13.36065573770492,8.688524590163933,8.852459016393441,17.04918032786885,10.655737704918032,18.524590163934423,13.442622950819676,9.5901639344262
COFBa	chr1	NonIntact	Gypsy_LTR_retrotransposon	9.098360655737704,9.59016393442623,16.31147540983606,3.7704918032786923,6.147540983606554,5.655737704918029,5.901639344262291,2.5409836065573796,1.5573770491803294,8.770491803278686,7.295081967213112,5.655737704918029,13.442622950819676,4.9180327868852505
COFBa	chr1	NonIntact	PIF_Harbinger_TIR_transposon	9.426229508196721,8.278688524590162,11.147540983606559,10.081967213114753,16.803278688524586,14.50819672131148,15.819672131147538,10.655737704918032,12.37704918032787,15.000000000000004,11.557377049180328,20.655737704918035,16.0655737704918,21.14754098360
COFBa	chr1	NonIntact	CACTA_TIR_transposon	17.540983606557372,16.63934426229508,19.262295081967213,10.491803278688524,13.278688524590166,8.934426229508196,16.393442622950815,23.19672131147541,17.786885245901637,2.049180327868854,1.0655737704918042,14.344262295081972,4.016393442622954,12.8688524590
COFBa	chr1	NonIntact	Tc1_Mariner_TIR_transposon	12.049180327868855,17.45901639344262,17.21311475409836,20.40983606557377,22.213114754098363,14.016393442622954,16.885245901639344,15.901639344262291,16.803278688524586,22.78688524590164,16.557377049180324,17.540983606557372,17.1311475409836,13.688524590163937,16.47540983606557,19.83606557377049,18.934426229508194,17.704918032786882,21.639344262295083,17.704918032786882,16.393442622950815,20.16393…
COFBa	chr2	NonIntact	Mutator_TIR_transposon	14.754098360655743,14.91803278688525,13.934426229508201,13.934426229508201,13.934426229508201,5.409836065573766,16.147540983606554,14.50819672131148,5.49180327868852,16.0655737704918,15.000000000000004,13.278688524590166,5.409836065573766,16.1475409836065
COFBa	chr2	NonIntact	Gypsy_LTR_retrotransposon	5.573770491803274,15.819672131147538,14.836065573770496,2.049180327868854,15.000000000000004,21.885245901639347,13.278688524590166,16.47540983606557,11.639344262295085,8.0327868852459,3.852459016393446,14.836065573770496,15.737704918032781,8.3606557377049
COFBa	chr2	NonIntact	Copia_LTR_retrotransposon	11.639344262295085,10.98360655737705,8.114754098360654,2.4590163934426252,3.9344262295082,15.983606557377046,6.393442622950817,16.885245901639344,20.0,12.54098360655738,17.62295081967213,12.459016393442624,8.0327868852459,5.737704918032783,12.950819672131
COFBa	chr2	NonIntact	hAT_TIR_transposon	11.967213114754099,16.147540983606554,14.672131147540988,16.967213114754095,14.098360655737707,17.29508196721311,16.63934426229508,16.557377049180324,7.704918032786884,13.114754098360658,16.393442622950815,10.819672131147541,6.147540983606554,8.7704918032
COFBa	chr2	NonIntact	LTR_retrotransposon	10.737704918032788,17.540983606557372,12.54098360655738,10.655737704918032,5.983606557377045,9.918032786885245,14.344262295081972,3.4426229508196755,18.442622950819672,11.39344262295082,13.852459016393446,22.213114754098363,23.68852459016394,12.3770491803
COFBa	chr2	NonIntact	helitron	20.737704918032787,14.91803278688525,19.262295081967213,14.344262295081972,13.606557377049183,15.245901639344268,18.360655737704917,21.229508196721312,23.934426229508198,22.049180327868854,15.245901639344268,14.016393442622954,17.86885245901639,4.75409836
COFBa	chr2	NonIntact	CACTA_TIR_transposon	22.459016393442624,16.967213114754095,22.049180327868854,14.672131147540988,9.754098360655737,14.426229508196725,11.721311475409838,21.557377049180328,18.360655737704917,10.901639344262296,12.131147540983608,14.180327868852462,14.098360655737707,21.885245
COFBa	chr2	NonIntact	PIF_Harbinger_TIR_transposon	22.049180327868854,6.721311475409832,10.819672131147541,21.639344262295083,12.459016393442624,12.459016393442624,15.737704918032781,19.508196721311474,6.803278688524587,11.311475409836067,20.573770491803277,22.213114754098363,18.852459016393443,16.1475409
COFBa	chr2	NonIntact	Tc1_Mariner_TIR_transposon	20.491803278688526,15.737704918032781,20.163934426229506,24.09836065573771,17.704918032786882,18.196721311475407,17.29508196721311,17.704918032786882,15.409836065573767,9.01639344262295,10.901639344262296,16.31147540983606,20.40983606557377,19.42622950819672,14.180327868852462,16.0655737704918,18.0327868852459,15.819672131147538,15.573770491803273,22.78688524590164,16.31147540983606,15.6557377049…
COFBa	chr3	NonIntact	Mutator_TIR_transposon	12.622950819672134,19.262295081967213,13.852459016393446,13.442622950819676,23.852459016393446,10.081967213114753,22.049180327868854,2.95081967213115,11.311475409836067,11.39344262295082,12.95081967213115,10.40983606557377,4.590163934426233,20.40983606557
COFBa	chr3	NonIntact	PIF_Harbinger_TIR_transposon	21.065573770491806,13.606557377049183,12.868852459016395,15.000000000000004,18.114754098360653,17.04918032786885,24.262295081967217,20.327868852459016,22.78688524590164,13.934426229508201,19.59016393442623,21.639344262295083,6.311475409836063,11.721311475
COFBa	chr3	NonIntact	Gypsy_LTR_retrotransposon	11.639344262295085,17.62295081967213,17.704918032786882,7.786885245901637,5.819672131147537,6.393442622950817,2.8688524590163964,15.901639344262291,3.2786885245901667,20.245901639344265,10.573770491803279,14.016393442622954,4.672131147540988,4.83606557377
COFBa	chr3	NonIntact	Copia_LTR_retrotransposon	15.573770491803273,3.2786885245901667,9.426229508196721,7.295081967213112,10.819672131147541,10.901639344262296,6.6393442622950785,3.852459016393446,22.049180327868854,4.8360655737704965,11.80327868852459,3.852459016393446,22.131147540983605,4.91803278688
COFBa	chr3	NonIntact	helitron	20.737704918032787,13.770491803278691,8.770491803278686,16.72131147540983,8.770491803278686,13.278688524590166,10.655737704918032,10.491803278688524,10.655737704918032,9.262295081967212,10.655737704918032,10.40983606557377,14.50819672131148,18.11475409836
COFBa	chr3	NonIntact	CACTA_TIR_transposon	13.934426229508201,12.622950819672134,14.50819672131148,15.655737704918028,10.655737704918032,11.967213114754099,14.91803278688525,15.819672131147538,16.47540983606557,10.327868852459018,22.295081967213118,9.262295081967212,17.1311475409836,18.77049180327
COFBa	chr3	NonIntact	LTR_retrotransposon	14.672131147540988,5.819672131147537,6.4754098360655705,3.2786885245901667,14.672131147540988,2.377049180327871,7.704918032786884,8.524590163934425,10.327868852459018,16.967213114754095,4.344262295081971,4.50819672131148,15.901639344262291,15.081967213114
COFBa	chr3	NonIntact	hAT_TIR_transposon	17.950819672131143,22.95081967213115,18.196721311475407,19.0983606557377,4.344262295081971,8.442622950819672,19.754098360655735,14.098360655737707,8.852459016393441,18.278688524590162,10.655737704918032,23.77049180327869,10.245901639344263,16.393442622950
COFBa	chr3	NonIntact	Tc1_Mariner_TIR_transposon	22.622950819672134,18.524590163934423,17.04918032786885,19.344262295081965,20.491803278688526,21.311475409836063,19.18032786885246,16.47540983606557,23.19672131147541,19.344262295081965,15.983606557377046,19.672131147540984,15.573770491803273,20.573770491803277,17.377049180327866,17.21311475409836,13.770491803278691,20.163934426229506,12.049180327868855,21.885245901639347,15.163934426229511,17.45…
COFBa	chr4	NonIntact	Mutator_TIR_transposon	14.50819672131148,14.50819672131148,14.50819672131148,14.672131147540988,21.885245901639347,21.885245901639347,15.000000000000004,18.934426229508194,21.721311475409834,22.54098360655738,22.54098360655738,17.786885245901637,18.524590163934423,8.77049180327
COFBa	chr4	NonIntact	Copia_LTR_retrotransposon	14.180327868852462,8.852459016393441,2.786885245901642,12.868852459016395,12.459016393442624,3.9344262295082,19.508196721311474,19.262295081967213,13.442622950819676,13.278688524590166,10.163934426229508,16.967213114754095,15.983606557377046,3.11475409836
COFBa	chr4	NonIntact	LTR_retrotransposon	4.9180327868852505,3.688524590163938,7.131147540983603,4.426229508196726,12.54098360655738,13.196721311475413,18.114754098360653,15.901639344262291,3.4426229508196755,19.18032786885246,6.4754098360655705,2.95081967213115,10.491803278688524,6.8032786885245
COFBa	chr4	NonIntact	helitron	17.704918032786882,13.524590163934429,18.852459016393443,21.721311475409834,10.491803278688524,18.524590163934423,8.360655737704915,18.606557377049178,6.4754098360655705,22.459016393442624,3.852459016393446,5.081967213114759,3.2786885245901667,20.49180327
COFBa	chr4	NonIntact	CACTA_TIR_transposon	17.45901639344262,8.934426229508196,13.852459016393446,18.934426229508194,21.475409836065577,16.22950819672131,19.18032786885246,21.721311475409834,17.1311475409836,20.163934426229506,16.72131147540983,17.86885245901639,18.688524590163933,20.1639344262295
COFBa	chr4	NonIntact	PIF_Harbinger_TIR_transposon	11.721311475409838,18.606557377049178,11.229508196721312,14.016393442622954,18.688524590163933,18.852459016393443,8.442622950819672,20.491803278688526,22.37704918032787,23.032786885245905,18.360655737704917,16.147540983606554,18.278688524590162,21.9672131
COFBa	chr4	NonIntact	Gypsy_LTR_retrotransposon	6.065573770491799,13.196721311475413,3.4426229508196755,6.5573770491803245,7.377049180327866,4.590163934426233,13.852459016393446,0.7377049180327875,6.885245901639341,2.4590163934426252,6.229508196721308,19.672131147540984,15.573770491803273,3.27868852459
COFBa	chr4	NonIntact	Tc1_Mariner_TIR_transposon	19.508196721311474,19.508196721311474,22.049180327868854,14.262295081967215,17.950819672131143,15.49180327868852,17.704918032786882,16.72131147540983,18.852459016393443,18.114754098360653,24.590163934426233,19.508196721311474,19.0983606557377,15.000000000000004,15.245901639344268,12.786885245901642,17.950819672131143,22.70491803278689,22.78688524590164,19.344262295081965,18.934426229508194,19.426…
COFBa	chr4	NonIntact	hAT_TIR_transposon	3.4426229508196755,5.1639344262295035,16.885245901639344,19.01639344262295,9.180327868852459,18.278688524590162,17.29508196721311,14.262295081967215,19.508196721311474,12.622950819672134,14.344262295081972,23.19672131147541,21.803278688524593,9.0983606557
COFBa	chr5	NonIntact	Mutator_TIR_transposon	14.91803278688525,14.836065573770496,2.622950819672133,23.68852459016394,16.393442622950815,19.59016393442623,13.36065573770492,4.590163934426233,13.032786885245905,14.016393442622954,13.032786885245905,11.229508196721312,16.393442622950815,16.88524590163
COFBa	chr5	NonIntact	hAT_TIR_transposon	11.557377049180328,20.655737704918035,13.442622950819676,3.9344262295082,14.426229508196725,7.786885245901637,21.229508196721312,15.327868852459021,23.36065573770492,22.95081967213115,11.967213114754099,19.0983606557377,18.524590163934423,15.0000000000000
COFBa	chr5	NonIntact	helitron	17.04918032786885,16.47540983606557,20.245901639344265,15.409836065573767,22.78688524590164,17.1311475409836,12.622950819672134,14.098360655737707,21.803278688524593,15.49180327868852,19.918032786885245,16.0655737704918,21.147540983606557,19.5901639344262
COFBa	chr5	NonIntact	PIF_Harbinger_TIR_transposon	18.852459016393443,18.114754098360653,15.000000000000004,10.081967213114753,13.196721311475413,19.01639344262295,18.442622950819672,17.29508196721311,14.836065573770496,21.721311475409834,20.163934426229506,14.016393442622954,18.114754098360653,20.3278688
COFBa	chr5	NonIntact	LTR_retrotransposon	1.393442622950821,8.442622950819672,16.885245901639344,13.032786885245905,16.557377049180324,13.196721311475413,12.868852459016395,14.344262295081972,8.114754098360654,9.426229508196721,19.0983606557377,16.885245901639344,19.42622950819672,15.245901639344
COFBa	chr5	NonIntact	CACTA_TIR_transposon	18.196721311475407,19.672131147540984,17.86885245901639,16.557377049180324,17.45901639344262,11.885245901639346,15.409836065573767,22.54098360655738,15.327868852459021,18.0327868852459,20.491803278688526,18.360655737704917,21.311475409836063,20.0,19.18032
COFBa	chr5	NonIntact	Copia_LTR_retrotransposon	15.983606557377046,6.311475409836063,7.622950819672129,9.098360655737704,8.278688524590162,10.245901639344263,9.344262295081966,18.442622950819672,11.885245901639346,15.737704918032781,22.78688524590164,19.18032786885246,24.016393442622952,11.393442622950
COFBa	chr5	NonIntact	Gypsy_LTR_retrotransposon	12.049180327868855,4.344262295081971,15.655737704918028,2.049180327868854,22.622950819672134,18.360655737704917,11.885245901639346,7.377049180327866,17.1311475409836,5.901639344262291,5.901639344262291,10.655737704918032,7.786885245901637,6.80327868852458
COFBa	chr5	NonIntact	Tc1_Mariner_TIR_transposon	13.114754098360658,15.081967213114758,4.672131147540988,15.983606557377046,15.737704918032781,18.196721311475407,19.672131147540984,18.442622950819672,14.344262295081972,21.639344262295083,18.852459016393443,18.196721311475407,22.213114754098363,22.78688524590164,21.393442622950822,17.86885245901639,10.163934426229508,14.836065573770496,11.967213114754099,20.327868852459016,19.0983606557377,17.95…
COFBa	chr6	NonIntact	Mutator_TIR_transposon	15.000000000000004,13.770491803278691,20.983606557377048,9.01639344262295,4.180327868852463,14.836065573770496,13.606557377049183,18.442622950819672,17.86885245901639,23.934426229508198,15.409836065573767,23.68852459016394,7.704918032786884,12.62295081967
COFBa	chr6	NonIntact	Copia_LTR_retrotransposon	11.229508196721312,15.655737704918028,6.5573770491803245,5.409836065573766,13.524590163934429,2.4590163934426252,17.786885245901637,17.950819672131143,14.426229508196725,14.590163934426233,8.114754098360654,15.081967213114758,18.770491803278688,11.1475409
COFBa	chr6	NonIntact	Tc1_Mariner_TIR_transposon	15.081967213114758,14.754098360655743,6.6393442622950785,14.672131147540988,20.983606557377048,21.311475409836063,19.0983606557377,22.213114754098363,15.737704918032781,13.934426229508201,17.21311475409836,22.78688524590164,18.114754098360653,22.78688524590164,16.22950819672131,10.737704918032788,17.62295081967213,18.196721311475407,14.016393442622954,16.147540983606554,15.163934426229511,15.2459…
COFBa	chr6	NonIntact	hAT_TIR_transposon	14.262295081967215,9.672131147540982,19.344262295081965,19.344262295081965,20.081967213114755,18.196721311475407,20.0,16.0655737704918,14.344262295081972,9.180327868852459,15.49180327868852,15.819672131147538,13.770491803278691,11.39344262295082,1.4754098
COFBa	chr6	NonIntact	PIF_Harbinger_TIR_transposon	19.0983606557377,16.72131147540983,21.9672131147541,19.0983606557377,8.360655737704915,10.40983606557377,10.98360655737705,18.0327868852459,19.344262295081965,12.704918032786887,10.0,13.36065573770492,17.86885245901639,10.573770491803279,19.67213114754098
COFBa	chr6	NonIntact	LTR_retrotransposon	11.80327868852459,16.967213114754095,13.688524590163937,24.262295081967217,10.819672131147541,12.54098360655738,8.360655737704915,13.442622950819676,13.278688524590166,6.803278688524587,6.967213114754096,5.819672131147537,5.409836065573766,8.1967213114754
COFBa	chr6	NonIntact	helitron	13.442622950819676,15.081967213114758,18.442622950819672,22.70491803278689,11.311475409836067,8.0327868852459,12.622950819672134,13.032786885245905,19.672131147540984,6.803278688524587,4.590163934426233,2.5409836065573796,1.393442622950821,2.2950819672131
COFBa	chr6	NonIntact	Gypsy_LTR_retrotransposon	14.180327868852462,1.9672131147541,6.065573770491799,8.524590163934425,11.721311475409838,12.868852459016395,18.606557377049178,5.983606557377045,22.95081967213115,8.934426229508196,6.4754098360655705,12.049180327868855,18.0327868852459,12.295081967213116
COFBa	chr6	NonIntact	CACTA_TIR_transposon	18.524590163934423,19.262295081967213,9.836065573770492,22.868852459016395,21.393442622950822,11.39344262295082,7.377049180327866,9.098360655737704,16.0655737704918,14.91803278688525,12.95081967213115,14.672131147540988,24.34426229508197,16.55737704918032
COFBa	chr7	NonIntact	Mutator_TIR_transposon	14.672131147540988,14.91803278688525,11.065573770491802,18.360655737704917,23.032786885245905,8.0327868852459,12.295081967213116,4.180327868852463,9.262295081967212,21.065573770491806,19.18032786885246,17.377049180327866,11.885245901639346,14.262295081967
COFBa	chr7	NonIntact	Gypsy_LTR_retrotransposon	16.885245901639344,5.573770491803274,16.22950819672131,16.393442622950815,18.524590163934423,7.131147540983603,23.032786885245905,12.704918032786887,8.360655737704915,16.22950819672131,6.803278688524587,18.770491803278688,14.098360655737707,14.09836065573
COFBa	chr7	NonIntact	Copia_LTR_retrotransposon	3.852459016393446,3.524590163934429,14.50819672131148,3.524590163934429,9.59016393442623,1.8032786885245917,8.60655737704918,6.065573770491799,3.7704918032786923,5.983606557377045,18.196721311475407,18.852459016393443,1.393442622950821,6.229508196721308,1
COFBa	chr7	NonIntact	LTR_retrotransposon	5.655737704918029,18.524590163934423,9.262295081967212,24.09836065573771,19.918032786885245,9.59016393442623,0.32786885245901665,9.426229508196721,18.934426229508194,18.442622950819672,14.344262295081972,14.426229508196725,7.786885245901637,13.52459016393
COFBa	chr7	NonIntact	PIF_Harbinger_TIR_transposon	17.21311475409836,20.737704918032787,19.01639344262295,17.950819672131143,22.70491803278689,19.262295081967213,14.91803278688525,16.47540983606557,19.0983606557377,20.737704918032787,17.29508196721311,22.295081967213118,18.442622950819672,18.9344262295081
COFBa	chr7	NonIntact	CACTA_TIR_transposon	7.868852459016391,15.327868852459021,9.262295081967212,12.459016393442624,11.639344262295085,23.032786885245905,20.327868852459016,5.000000000000004,22.54098360655738,16.63934426229508,16.885245901639344,24.34426229508197,15.573770491803273,19.01639344262
COFBa	chr7	NonIntact	helitron	7.213114754098358,19.42622950819672,22.049180327868854,18.360655737704917,5.901639344262291,4.590163934426233,15.081967213114758,12.786885245901642,11.967213114754099,12.54098360655738,12.049180327868855,12.868852459016395,21.147540983606557,22.7049180327
COFBa	chr7	NonIntact	hAT_TIR_transposon	17.29508196721311,5.655737704918029,17.704918032786882,13.114754098360658,17.950819672131143,22.54098360655738,15.000000000000004,19.344262295081965,14.180327868852462,15.983606557377046,19.0983606557377,5.737704918032783,22.131147540983605,15.73770491803
COFBa	chr7	NonIntact	Tc1_Mariner_TIR_transposon	16.47540983606557,16.47540983606557,17.377049180327866,16.72131147540983,18.852459016393443,20.901639344262293,21.639344262295083,14.91803278688525,11.475409836065575,20.163934426229506,18.852459016393443,21.393442622950822,16.885245901639344,15.901639344262291,17.62295081967213,22.295081967213118,22.131147540983605,23.19672131147541,17.1311475409836,13.688524590163937,21.475409836065577,19.34426…
COFBa	chr8	NonIntact	LTR_retrotransposon	12.131147540983608,12.131147540983608,12.131147540983608,13.606557377049183,13.524590163934429,15.901639344262291,5.573770491803274,4.754098360655742,17.540983606557372,8.60655737704918,13.032786885245905,1.5573770491803294,5.901639344262291,6.06557377049
COFBa	chr8	NonIntact	Mutator_TIR_transposon	15.819672131147538,15.819672131147538,18.278688524590162,18.0327868852459,20.491803278688526,21.639344262295083,19.672131147540984,5.409836065573766,20.40983606557377,6.393442622950817,3.1147540983606588,5.737704918032783,21.803278688524593,5.245901639344
COFBa	chr8	NonIntact	Copia_LTR_retrotransposon	23.442622950819676,23.442622950819676,3.1147540983606588,24.426229508196727,18.360655737704917,9.918032786885245,7.786885245901637,12.049180327868855,19.42622950819672,6.885245901639341,11.311475409836067,18.852459016393443,5.000000000000004,6.55737704918
COFBa	chr8	NonIntact	CACTA_TIR_transposon	3.360655737704921,3.360655737704921,19.18032786885246,23.68852459016394,13.688524590163937,17.04918032786885,16.72131147540983,16.72131147540983,16.72131147540983,16.22950819672131,15.573770491803273,16.967213114754095,16.967213114754095,16.14754098360655
COFBa	chr8	NonIntact	helitron	12.131147540983608,10.0,16.22950819672131,19.01639344262295,17.950819672131143,16.72131147540983,3.852459016393446,7.868852459016391,7.868852459016391,16.0655737704918,17.62295081967213,6.4754098360655705,17.29508196721311,18.0327868852459,2.2131147540983
COFBa	chr8	NonIntact	hAT_TIR_transposon	19.508196721311474,14.016393442622954,20.573770491803277,17.04918032786885,7.622950819672129,14.262295081967215,9.836065573770492,19.508196721311474,9.262295081967212,19.59016393442623,5.327868852459011,8.360655737704915,8.770491803278686,15.4098360655737
COFBa	chr8	NonIntact	Gypsy_LTR_retrotransposon	20.491803278688526,18.0327868852459,23.852459016393446,22.54098360655738,11.311475409836067,7.213114754098358,13.196721311475413,16.803278688524586,16.72131147540983,16.967213114754095,16.22950819672131,15.737704918032781,15.081967213114758,14.59016393442
COFBa	chr8	NonIntact	PIF_Harbinger_TIR_transposon	12.131147540983608,12.131147540983608,13.196721311475413,12.786885245901642,12.131147540983608,15.819672131147538,11.967213114754099,15.000000000000004,14.590163934426233,13.278688524590166,11.639344262295085,12.131147540983608,10.819672131147541,15.73770
COFBa	chr8	NonIntact	Tc1_Mariner_TIR_transposon	14.754098360655743,20.081967213114755,17.704918032786882,12.704918032786887,21.885245901639347,22.049180327868854,13.36065573770492,9.098360655737704,13.114754098360658,20.655737704918035,19.344262295081965,20.245901639344265,14.754098360655743,19.83606557377049,15.081967213114758,23.934426229508198,22.295081967213118,24.34426229508197,23.68852459016394,22.78688524590164,12.37704918032787,18.1967…
COFBa	chr9	NonIntact	Mutator_TIR_transposon	14.754098360655743,14.50819672131148,8.114754098360654,17.86885245901639,22.459016393442624,16.72131147540983,18.688524590163933,18.114754098360653,19.262295081967213,2.95081967213115,4.754098360655742,6.6393442622950785,6.967213114754096,13.1967213114754
COFBa	chr9	NonIntact	helitron	14.344262295081972,2.213114754098363,10.0,6.311475409836063,19.918032786885245,1.8032786885245917,15.245901639344268,18.770491803278688,17.86885245901639,11.475409836065575,1.9672131147541,18.442622950819672,10.573770491803279,21.475409836065577,17.786885
COFBa	chr9	NonIntact	CACTA_TIR_transposon	21.885245901639347,7.459016393442621,10.901639344262296,9.01639344262295,22.78688524590164,11.557377049180328,12.868852459016395,10.163934426229508,8.688524590163933,10.491803278688524,15.983606557377046,12.295081967213116,12.622950819672134,24.3442622950
COFBa	chr9	NonIntact	LTR_retrotransposon	16.0655737704918,3.2786885245901667,4.8360655737704965,6.147540983606554,3.360655737704921,14.50819672131148,13.770491803278691,17.950819672131143,2.622950819672133,7.9508196721311455,6.721311475409832,3.4426229508196755,4.50819672131148,5.49180327868852,
COFBa	chr9	NonIntact	hAT_TIR_transposon	15.655737704918028,19.01639344262295,21.885245901639347,17.04918032786885,19.508196721311474,18.360655737704917,15.409836065573767,15.245901639344268,13.934426229508201,20.81967213114754,20.573770491803277,20.327868852459016,15.737704918032781,20.81967213
COFBa	chr9	NonIntact	Copia_LTR_retrotransposon	2.377049180327871,14.344262295081972,19.754098360655735,16.72131147540983,18.606557377049178,12.213114754098363,9.836065573770492,10.737704918032788,13.032786885245905,17.45901639344262,17.540983606557372,3.1967213114754123,3.4426229508196755,2.7049180327
COFBa	chr9	NonIntact	PIF_Harbinger_TIR_transposon	19.83606557377049,16.803278688524586,13.196721311475413,11.147540983606559,16.47540983606557,21.803278688524593,22.049180327868854,22.213114754098363,13.688524590163937,24.590163934426233,20.983606557377048,22.54098360655738,19.59016393442623,21.639344262
COFBa	chr9	NonIntact	Gypsy_LTR_retrotransposon	3.2786885245901667,5.49180327868852,5.081967213114759,5.49180327868852,12.131147540983608,16.0655737704918,4.50819672131148,10.491803278688524,10.327868852459018,6.885245901639341,4.098360655737708,17.950819672131143,16.63934426229508,5.737704918032783,5.
COFBa	chr9	NonIntact	Tc1_Mariner_TIR_transposon	23.27868852459017,18.442622950819672,15.655737704918028,16.885245901639344,13.934426229508201,17.540983606557372,13.278688524590166,13.36065573770492,19.18032786885246,14.262295081967215,20.491803278688526,15.901639344262291,19.18032786885246,20.983606557377048,20.573770491803277,20.245901639344265,19.672131147540984,17.704918032786882,17.1311475409836,17.704918032786882,17.950819672131143,18.688…
COFBa	chrX	NonIntact	Gypsy_LTR_retrotransposon	4.426229508196726,9.01639344262295,1.6393442622950833,3.0327868852459043,24.50819672131148,11.147540983606559,18.934426229508194,13.196721311475413,11.475409836065575,2.4590163934426252,9.01639344262295,2.5409836065573796,19.83606557377049,11.229508196721
COFBa	chrX	NonIntact	LTR_retrotransposon	2.2950819672131164,3.524590163934429,5.081967213114759,7.622950819672129,9.344262295081966,11.557377049180328,4.590163934426233,5.245901639344258,4.9180327868852505,14.262295081967215,12.049180327868855,7.540983606557375,9.508196721311474,6.31147540983606
COFBa	chrX	NonIntact	Mutator_TIR_transposon	14.91803278688525,21.311475409836063,5.819672131147537,21.311475409836063,14.344262295081972,21.229508196721312,17.1311475409836,16.803278688524586,16.885245901639344,17.950819672131143,19.42622950819672,22.459016393442624,22.459016393442624,10.7377049180
COFBa	chrX	NonIntact	helitron	17.86885245901639,2.213114754098363,4.016393442622954,17.86885245901639,17.45901639344262,16.147540983606554,18.360655737704917,5.081967213114759,15.163934426229511,17.540983606557372,8.852459016393441,16.147540983606554,17.1311475409836,19.75409836065573
COFBa	chrX	NonIntact	CACTA_TIR_transposon	16.63934426229508,16.63934426229508,14.590163934426233,8.524590163934425,13.36065573770492,16.557377049180324,18.770491803278688,15.901639344262291,23.19672131147541,21.721311475409834,16.22950819672131,18.0327868852459,11.80327868852459,18.44262295081967
COFBa	chrX	NonIntact	PIF_Harbinger_TIR_transposon	13.278688524590166,13.278688524590166,10.901639344262296,18.688524590163933,21.393442622950822,7.622950819672129,13.114754098360658,20.40983606557377,17.86885245901639,21.393442622950822,21.147540983606557,16.967213114754095,16.47540983606557,19.262295081
COFBa	chrX	NonIntact	hAT_TIR_transposon	16.72131147540983,16.22950819672131,17.377049180327866,17.704918032786882,14.262295081967215,16.967213114754095,16.22950819672131,11.885245901639346,4.672131147540988,13.442622950819676,23.524590163934427,12.459016393442624,20.081967213114755,16.311475409
COFBa	chrX	NonIntact	Copia_LTR_retrotransposon	4.344262295081971,12.54098360655738,4.672131147540988,21.147540983606557,19.42622950819672,16.47540983606557,11.80327868852459,7.131147540983603,8.278688524590162,18.0327868852459,14.098360655737707,14.426229508196725,16.47540983606557,7.622950819672129,6
COFBa	chrX	NonIntact	Tc1_Mariner_TIR_transposon	17.45901639344262,16.63934426229508,19.0983606557377,21.393442622950822,19.508196721311474,15.573770491803273,16.47540983606557,21.393442622950822,19.01639344262295,13.032786885245905,19.59016393442623,23.60655737704918,18.688524590163933,16.63934426229508,18.524590163934423,18.114754098360653,14.91803278688525,21.147540983606557,16.803278688524586,15.655737704918028,15.819672131147538,13.8524590…
COFBb	chr1	NonIntact	Mutator_TIR_transposon	14.098360655737707,6.393442622950817,17.950819672131143,15.655737704918028,11.639344262295085,17.86885245901639,13.606557377049183,11.557377049180328,20.81967213114754,18.196721311475407,14.344262295081972,15.327868852459021,17.1311475409836,20.7377049180
COFBb	chr1	NonIntact	helitron	17.04918032786885,15.081967213114758,17.377049180327866,16.31147540983606,17.540983606557372,13.934426229508201,17.1311475409836,23.68852459016394,4.590163934426233,11.39344262295082,11.39344262295082,19.83606557377049,17.62295081967213,13.852459016393446
COFBb	chr1	NonIntact	LTR_retrotransposon	4.426229508196726,16.803278688524586,4.098360655737708,0.0,14.262295081967215,12.54098360655738,2.5409836065573796,14.50819672131148,17.540983606557372,3.524590163934429,13.442622950819676,12.786885245901642,19.262295081967213,12.213114754098363,15.409836
COFBb	chr1	NonIntact	Copia_LTR_retrotransposon	4.754098360655742,1.8852459016393461,12.622950819672134,16.31147540983606,16.31147540983606,18.0327868852459,11.311475409836067,15.245901639344268,14.50819672131148,16.63934426229508,13.606557377049183,20.327868852459016,13.934426229508201,10.245901639344
COFBb	chr1	NonIntact	CACTA_TIR_transposon	17.04918032786885,21.229508196721312,18.278688524590162,16.72131147540983,15.49180327868852,20.327868852459016,20.40983606557377,16.557377049180324,16.147540983606554,15.327868852459021,13.032786885245905,21.803278688524593,22.459016393442624,4.5081967213
COFBb	chr1	NonIntact	hAT_TIR_transposon	18.114754098360653,5.901639344262291,16.147540983606554,16.22950819672131,3.7704918032786923,9.918032786885245,7.213114754098358,14.016393442622954,16.72131147540983,15.000000000000004,13.606557377049183,5.409836065573766,16.557377049180324,14.01639344262
COFBb	chr1	NonIntact	PIF_Harbinger_TIR_transposon	10.737704918032788,14.590163934426233,19.262295081967213,10.40983606557377,20.327868852459016,15.983606557377046,20.0,17.21311475409836,20.245901639344265,15.409836065573767,12.459016393442624,14.50819672131148,19.918032786885245,21.065573770491806,12.213114754098363,13.688524590163937,20.983606557377048,12.868852459016395,5.081967213114759,12.459016393442624,9.01639344262295,13.688524590163937,1…
COFBb	chr1	NonIntact	Gypsy_LTR_retrotransposon	13.442622950819676,16.393442622950815,20.655737704918035,17.540983606557372,22.213114754098363,14.016393442622954,17.62295081967213,4.344262295081971,14.836065573770496,13.032786885245905,5.573770491803274,5.49180327868852,20.737704918032787,4.09836065573
COFBb	chr1	NonIntact	Tc1_Mariner_TIR_transposon	17.86885245901639,16.885245901639344,14.098360655737707,11.311475409836067,7.131147540983603,19.918032786885245,17.704918032786882,17.377049180327866,17.45901639344262,17.29508196721311,20.983606557377048,15.655737704918028,10.491803278688524,6.721311475409832,8.770491803278686,20.327868852459016,11.229508196721312,8.0327868852459,18.0327868852459,15.819672131147538,18.278688524590162,16.39344262…
COFBb	chr2	NonIntact	Mutator_TIR_transposon	14.180327868852462,13.770491803278691,13.934426229508201,7.868852459016391,7.295081967213112,7.868852459016391,13.688524590163937,8.852459016393441,19.508196721311474,18.852459016393443,18.524590163934423,5.245901639344258,19.508196721311474,20.9016393442
COFBb	chr2	NonIntact	CACTA_TIR_transposon	1.8032786885245917,2.95081967213115,2.95081967213115,0.2459016393442625,6.5573770491803245,0.491803278688525,6.5573770491803245,20.901639344262293,17.04918032786885,14.50819672131148,15.819672131147538,18.278688524590162,23.19672131147541,20.7377049180327
COFBb	chr2	NonIntact	hAT_TIR_transposon	12.295081967213116,18.114754098360653,13.36065573770492,16.803278688524586,3.852459016393446,5.081967213114759,16.63934426229508,18.688524590163933,9.59016393442623,17.377049180327866,11.065573770491802,12.295081967213116,13.688524590163937,17.62295081967
COFBb	chr2	NonIntact	LTR_retrotransposon	0.98360655737705,3.9344262295082,13.36065573770492,6.803278688524587,17.29508196721311,5.655737704918029,5.000000000000004,8.442622950819672,11.39344262295082,8.60655737704918,5.655737704918029,8.0327868852459,15.737704918032781,10.655737704918032,15.7377
COFBb	chr2	NonIntact	helitron	16.31147540983606,16.31147540983606,16.31147540983606,16.31147540983606,16.147540983606554,14.672131147540988,13.688524590163937,10.081967213114753,20.163934426229506,18.196721311475407,16.393442622950815,14.180327868852462,16.47540983606557,16.0655737704
COFBb	chr2	NonIntact	Copia_LTR_retrotransposon	15.983606557377046,15.983606557377046,2.2950819672131164,9.01639344262295,2.7049180327868876,3.6065573770491834,20.327868852459016,13.688524590163937,15.245901639344268,15.901639344262291,21.065573770491806,14.098360655737707,22.78688524590164,14.09836065
COFBb	chr2	NonIntact	Gypsy_LTR_retrotransposon	11.475409836065575,18.442622950819672,10.0,17.45901639344262,21.721311475409834,1.393442622950821,18.0327868852459,21.229508196721312,18.442622950819672,14.180327868852462,14.672131147540988,23.19672131147541,5.327868852459011,9.672131147540982,11.5573770
COFBb	chr2	NonIntact	PIF_Harbinger_TIR_transposon	16.967213114754095,16.31147540983606,13.278688524590166,13.934426229508201,16.47540983606557,20.40983606557377,22.95081967213115,12.295081967213116,15.245901639344268,14.344262295081972,12.295081967213116,19.508196721311474,15.737704918032781,21.557377049
COFBb	chr2	NonIntact	Tc1_Mariner_TIR_transposon	13.688524590163937,14.836065573770496,22.54098360655738,14.262295081967215,16.22950819672131,15.081967213114758,20.655737704918035,17.45901639344262,14.50819672131148,14.426229508196725,14.672131147540988,15.245901639344268,15.573770491803273,20.573770491803277,21.803278688524593,19.42622950819672,18.360655737704917,15.409836065573767,12.459016393442624,11.39344262295082,17.540983606557372,13.688…
COFBb	chr3	NonIntact	Mutator_TIR_transposon	14.016393442622954,13.934426229508201,12.459016393442624,11.721311475409838,13.770491803278691,15.409836065573767,17.1311475409836,10.655737704918032,11.147540983606559,11.80327868852459,9.508196721311474,11.39344262295082,14.836065573770496,10.2459016393
COFBb	chr3	NonIntact	LTR_retrotransposon	14.180327868852462,12.295081967213116,14.262295081967215,11.639344262295085,17.1311475409836,5.49180327868852,15.737704918032781,15.655737704918028,13.688524590163937,19.754098360655735,21.721311475409834,8.852459016393441,14.016393442622954,14.5901639344
COFBb	chr3	NonIntact	Copia_LTR_retrotransposon	11.311475409836067,14.180327868852462,5.49180327868852,4.8360655737704965,5.819672131147537,3.2786885245901667,11.80327868852459,21.147540983606557,5.49180327868852,3.6065573770491834,20.655737704918035,6.5573770491803245,8.360655737704915,20.163934426229
COFBb	chr3	NonIntact	Gypsy_LTR_retrotransposon	21.721311475409834,8.852459016393441,0.98360655737705,2.4590163934426252,2.4590163934426252,20.655737704918035,23.36065573770492,11.475409836065575,14.50819672131148,13.934426229508201,12.37704918032787,4.016393442622954,16.0655737704918,16.96721311475409
COFBb	chr3	NonIntact	helitron	19.01639344262295,22.049180327868854,15.081967213114758,19.83606557377049,8.524590163934425,9.180327868852459,8.688524590163933,9.262295081967212,11.147540983606559,6.393442622950817,11.885245901639346,9.836065573770492,11.311475409836067,14.5901639344262
COFBb	chr3	NonIntact	CACTA_TIR_transposon	5.327868852459011,7.622950819672129,15.49180327868852,9.098360655737704,21.311475409836063,8.770491803278686,16.803278688524586,17.1311475409836,9.918032786885245,20.245901639344265,21.9672131147541,18.114754098360653,19.0983606557377,8.852459016393441,13
COFBb	chr3	NonIntact	hAT_TIR_transposon	2.5409836065573796,23.68852459016394,16.557377049180324,18.606557377049178,11.229508196721312,14.91803278688525,20.655737704918035,11.80327868852459,18.688524590163933,22.131147540983605,12.459016393442624,12.868852459016395,14.426229508196725,22.37704918
COFBb	chr3	NonIntact	Tc1_Mariner_TIR_transposon	15.819672131147538,12.622950819672134,16.803278688524586,22.70491803278689,18.278688524590162,19.18032786885246,12.049180327868855,14.426229508196725,15.737704918032781,12.95081967213115,15.409836065573767,19.918032786885245,20.737704918032787,20.655737704918035,21.803278688524593,18.852459016393443,21.393442622950822,22.37704918032787,14.590163934426233,23.114754098360656,20.983606557377048,15.2…
COFBb	chr3	NonIntact	PIF_Harbinger_TIR_transposon	19.0983606557377,22.78688524590164,17.29508196721311,23.77049180327869,10.737704918032788,16.803278688524586,23.19672131147541,18.852459016393443,12.54098360655738,12.868852459016395,20.737704918032787,19.344262295081965,21.885245901639347,20.081967213114
COFBb	chr4	NonIntact	Mutator_TIR_transposon	13.852459016393446,14.180327868852462,16.0655737704918,14.344262295081972,7.786885245901637,15.655737704918028,13.606557377049183,20.081967213114755,8.0327868852459,20.573770491803277,18.114754098360653,15.819672131147538,16.803278688524586,20.24590163934
COFBb	chr4	NonIntact	LTR_retrotransposon	4.016393442622954,16.47540983606557,11.475409836065575,1.475409836065575,10.0,18.606557377049178,16.31147540983606,4.344262295081971,17.1311475409836,12.622950819672134,19.344262295081965,11.475409836065575,14.50819672131148,0.491803278688525,8.1967213114
COFBb	chr4	NonIntact	CACTA_TIR_transposon	13.36065573770492,11.557377049180328,18.114754098360653,16.0655737704918,20.327868852459016,15.49180327868852,22.868852459016395,18.196721311475407,11.557377049180328,20.491803278688526,16.72131147540983,13.114754098360658,7.622950819672129,17.21311475409
COFBb	chr4	NonIntact	Tc1_Mariner_TIR_transposon	10.0,24.50819672131148,19.0983606557377,11.639344262295085,19.0983606557377,12.704918032786887,18.688524590163933,14.672131147540988,22.95081967213115,18.688524590163933,19.0983606557377,17.21311475409836,20.491803278688526,16.22950819672131,20.0,13.114754098360658,20.737704918032787,6.5573770491803245,3.360655737704921,14.590163934426233,13.442622950819676,23.524590163934427,15.49180327868852,3.…
COFBb	chr4	NonIntact	helitron	12.95081967213115,14.262295081967215,21.311475409836063,17.786885245901637,9.344262295081966,18.114754098360653,16.557377049180324,17.377049180327866,19.344262295081965,11.311475409836067,18.0327868852459,20.573770491803277,21.229508196721312,18.196721311
COFBb	chr4	NonIntact	PIF_Harbinger_TIR_transposon	20.40983606557377,16.393442622950815,18.934426229508194,24.180327868852462,22.131147540983605,19.754098360655735,5.655737704918029,3.688524590163938,6.311475409836063,20.573770491803277,21.393442622950822,19.754098360655735,13.032786885245905,21.9672131147541,21.885245901639347,15.655737704918028,18.360655737704917,10.901639344262296,10.491803278688524,11.885245901639346,21.311475409836063,23.032…
COFBb	chr4	NonIntact	Gypsy_LTR_retrotransposon	21.311475409836063,10.081967213114753,12.54098360655738,21.639344262295083,17.1311475409836,9.426229508196721,2.4590163934426252,21.9672131147541,18.770491803278688,10.081967213114753,18.524590163934423,5.573770491803274,5.327868852459011,14.0163934426229
COFBb	chr4	NonIntact	hAT_TIR_transposon	16.147540983606554,10.98360655737705,14.262295081967215,16.885245901639344,7.04918032786885,15.737704918032781,5.983606557377045,18.278688524590162,19.0983606557377,15.983606557377046,21.393442622950822,19.672131147540984,20.0,19.01639344262295,16.0655737
COFBb	chr4	NonIntact	Copia_LTR_retrotransposon	12.95081967213115,19.59016393442623,19.262295081967213,18.196721311475407,19.59016393442623,9.098360655737704,15.901639344262291,17.950819672131143,17.377049180327866,4.590163934426233,19.01639344262295,9.672131147540982,13.934426229508201,17.459016393442
COFBb	chr5	NonIntact	Mutator_TIR_transposon	14.426229508196725,14.426229508196725,14.426229508196725,14.098360655737707,14.426229508196725,22.95081967213115,10.163934426229508,22.868852459016395,18.0327868852459,16.557377049180324,17.1311475409836,3.688524590163938,13.524590163934429,14.26229508196
COFBb	chr5	NonIntact	hAT_TIR_transposon	20.0,15.983606557377046,15.819672131147538,14.50819672131148,14.50819672131148,16.22950819672131,6.065573770491799,17.704918032786882,14.180327868852462,9.508196721311474,13.934426229508201,13.524590163934429,20.81967213114754,24.016393442622952,15.655737
COFBb	chr5	NonIntact	Gypsy_LTR_retrotransposon	13.196721311475413,6.885245901639341,3.688524590163938,5.819672131147537,6.6393442622950785,4.754098360655742,22.049180327868854,20.491803278688526,16.31147540983606,2.8688524590163964,4.672131147540988,4.426229508196726,1.9672131147541,0.8196721311475417
COFBb	chr5	NonIntact	helitron	16.803278688524586,21.065573770491806,16.72131147540983,15.000000000000004,14.50819672131148,10.819672131147541,15.081967213114758,12.95081967213115,6.6393442622950785,10.98360655737705,14.590163934426233,14.50819672131148,5.655737704918029,19.67213114754
COFBb	chr5	NonIntact	LTR_retrotransposon	2.5409836065573796,8.196721311475407,13.852459016393446,6.393442622950817,13.852459016393446,16.0655737704918,13.032786885245905,24.34426229508197,6.6393442622950785,3.2786885245901667,7.459016393442621,14.836065573770496,19.83606557377049,2.7868852459016
COFBb	chr5	NonIntact	PIF_Harbinger_TIR_transposon	13.196721311475413,18.688524590163933,4.262295081967217,16.22950819672131,10.163934426229508,12.459016393442624,10.491803278688524,17.04918032786885,14.426229508196725,15.163934426229511,17.04918032786885,14.426229508196725,15.163934426229511,11.147540983
COFBb	chr5	NonIntact	Tc1_Mariner_TIR_transposon	22.049180327868854,23.19672131147541,23.19672131147541,14.836065573770496,23.36065573770492,13.196721311475413,14.426229508196725,15.983606557377046,17.704918032786882,15.163934426229511,8.524590163934425,16.22950819672131,13.36065573770492,10.573770491803279,15.000000000000004,10.081967213114753,18.688524590163933,17.540983606557372,12.868852459016395,17.86885245901639,17.377049180327866,17.1311…
COFBb	chr5	NonIntact	Copia_LTR_retrotransposon	6.065573770491799,2.1311475409836085,17.29508196721311,12.049180327868855,15.983606557377046,8.688524590163933,9.59016393442623,5.000000000000004,23.77049180327869,14.590163934426233,6.5573770491803245,8.114754098360654,16.147540983606554,4.75409836065574
COFBb	chr5	NonIntact	CACTA_TIR_transposon	20.901639344262293,9.01639344262295,13.934426229508201,14.180327868852462,3.4426229508196755,17.1311475409836,20.245901639344265,23.114754098360656,15.327868852459021,18.196721311475407,15.081967213114758,19.508196721311474,17.786885245901637,23.606557377
COFBb	chr6	NonIntact	Mutator_TIR_transposon	12.049180327868855,13.934426229508201,14.016393442622954,14.016393442622954,14.016393442622954,14.098360655737707,14.590163934426233,12.459016393442624,11.475409836065575,11.885245901639346,20.40983606557377,16.47540983606557,19.754098360655735,7.78688524
COFBb	chr6	NonIntact	CACTA_TIR_transposon	21.721311475409834,16.803278688524586,14.344262295081972,17.950819672131143,17.950819672131143,21.147540983606557,14.344262295081972,9.098360655737704,11.39344262295082,16.967213114754095,16.885245901639344,21.9672131147541,9.918032786885245,18.3606557377
COFBb	chr6	NonIntact	LTR_retrotransposon	5.081967213114759,11.639344262295085,9.098360655737704,8.278688524590162,15.245901639344268,2.8688524590163964,19.918032786885245,14.016393442622954,5.573770491803274,16.885245901639344,5.327868852459011,7.786885245901637,16.147540983606554,4.918032786885
COFBb	chr6	NonIntact	helitron	16.72131147540983,14.91803278688525,14.754098360655743,17.1311475409836,13.442622950819676,15.737704918032781,12.704918032786887,16.393442622950815,14.590163934426233,18.852459016393443,23.27868852459017,20.655737704918035,22.70491803278689,17.62295081967
COFBb	chr6	NonIntact	hAT_TIR_transposon	17.540983606557372,18.114754098360653,4.426229508196726,14.344262295081972,19.344262295081965,7.9508196721311455,13.032786885245905,17.704918032786882,21.557377049180328,17.86885245901639,15.245901639344268,3.2786885245901667,9.098360655737704,9.836065573
COFBb	chr6	NonIntact	Copia_LTR_retrotransposon	16.63934426229508,16.63934426229508,16.22950819672131,7.295081967213112,3.524590163934429,14.016393442622954,18.852459016393443,3.688524590163938,18.196721311475407,12.459016393442624,5.327868852459011,10.655737704918032,22.459016393442624,20.573770491803
COFBb	chr6	NonIntact	Gypsy_LTR_retrotransposon	3.7704918032786923,10.737704918032788,4.9180327868852505,4.344262295081971,22.295081967213118,14.426229508196725,17.62295081967213,6.6393442622950785,18.852459016393443,5.245901639344258,3.1967213114754123,3.4426229508196755,22.78688524590164,12.377049180
COFBb	chr6	NonIntact	PIF_Harbinger_TIR_transposon	18.360655737704917,18.852459016393443,21.229508196721312,15.49180327868852,23.68852459016394,19.59016393442623,20.491803278688526,17.45901639344262,8.688524590163933,16.393442622950815,12.868852459016395,17.29508196721311,19.42622950819672,16.0655737704918,15.000000000000004,21.557377049180328,12.622950819672134,22.37704918032787,9.754098360655737,7.9508196721311455,15.081967213114758,17.78688524…
COFBb	chr6	NonIntact	Tc1_Mariner_TIR_transposon	7.704918032786884,7.786885245901637,13.196721311475413,10.245901639344263,9.59016393442623,23.19672131147541,14.590163934426233,19.01639344262295,18.0327868852459,19.83606557377049,16.803278688524586,15.327868852459021,24.180327868852462,10.737704918032788,14.50819672131148,8.0327868852459,14.836065573770496,6.229508196721308,3.0327868852459043,21.475409836065577,21.311475409836063,15.81967213114…
COFBb	chr7	NonIntact	Mutator_TIR_transposon	14.344262295081972,13.770491803278691,14.262295081967215,13.852459016393446,14.262295081967215,24.50819672131148,22.37704918032787,22.70491803278689,23.19672131147541,23.934426229508198,22.131147540983605,23.934426229508198,24.590163934426233,17.295081967
COFBb	chr7	NonIntact	Gypsy_LTR_retrotransposon	17.1311475409836,14.91803278688525,23.68852459016394,11.967213114754099,23.77049180327869,23.68852459016394,10.245901639344263,19.672131147540984,15.901639344262291,23.77049180327869,12.786885245901642,24.180327868852462,23.68852459016394,11.9672131147540
COFBb	chr7	NonIntact	helitron	17.21311475409836,15.081967213114758,16.31147540983606,23.032786885245905,16.393442622950815,17.950819672131143,24.34426229508197,22.049180327868854,24.09836065573771,20.163934426229506,13.852459016393446,13.442622950819676,14.50819672131148,3.27868852459
COFBb	chr7	NonIntact	LTR_retrotransposon	14.180327868852462,12.54098360655738,13.36065573770492,13.524590163934429,6.721311475409832,8.442622950819672,8.852459016393441,19.672131147540984,11.967213114754099,12.868852459016395,12.704918032786887,9.836065573770492,12.704918032786887,9.262295081967
COFBb	chr7	NonIntact	Tc1_Mariner_TIR_transposon	20.081967213114755,14.91803278688525,16.72131147540983,14.262295081967215,20.081967213114755,14.91803278688525,16.72131147540983,14.91803278688525,17.29508196721311,14.91803278688525,21.803278688524593,16.557377049180324,15.737704918032781,17.62295081967213,9.01639344262295,15.819672131147538,9.098360655737704,15.000000000000004,15.901639344262291,14.344262295081972,17.377049180327866,15.98360655…
COFBb	chr7	NonIntact	CACTA_TIR_transposon	17.540983606557372,19.01639344262295,16.31147540983606,17.21311475409836,18.196721311475407,14.91803278688525,16.147540983606554,10.40983606557377,11.147540983606559,8.278688524590162,10.0,18.688524590163933,23.114754098360656,18.524590163934423,16.229508
COFBb	chr7	NonIntact	Copia_LTR_retrotransposon	21.475409836065577,21.639344262295083,17.21311475409836,19.672131147540984,17.704918032786882,17.1311475409836,17.786885245901637,18.114754098360653,15.49180327868852,17.377049180327866,15.655737704918028,8.60655737704918,2.5409836065573796,14.67213114754
COFBb	chr7	NonIntact	PIF_Harbinger_TIR_transposon	15.655737704918028,19.262295081967213,16.72131147540983,14.836065573770496,13.36065573770492,10.327868852459018,16.803278688524586,24.50819672131148,16.885245901639344,9.01639344262295,10.98360655737705,10.245901639344263,15.655737704918028,8.606557377049
COFBb	chr7	NonIntact	hAT_TIR_transposon	14.590163934426233,17.04918032786885,3.852459016393446,5.655737704918029,7.704918032786884,12.54098360655738,15.983606557377046,18.442622950819672,6.065573770491799,4.9180327868852505,17.04918032786885,21.885245901639347,7.704918032786884,6.39344262295081
COFBb	chr8	NonIntact	Mutator_TIR_transposon	14.262295081967215,14.098360655737707,14.016393442622954,14.016393442622954,14.016393442622954,13.934426229508201,17.45901639344262,8.0327868852459,16.803278688524586,17.1311475409836,18.688524590163933,16.0655737704918,5.901639344262291,17.70491803278688
COFBb	chr8	NonIntact	CACTA_TIR_transposon	21.885245901639347,17.29508196721311,14.016393442622954,15.983606557377046,17.45901639344262,15.983606557377046,17.377049180327866,20.737704918032787,7.9508196721311455,18.606557377049178,23.60655737704918,18.688524590163933,13.524590163934429,6.311475409
COFBb	chr8	NonIntact	LTR_retrotransposon	5.081967213114759,13.032786885245905,6.885245901639341,11.147540983606559,13.36065573770492,8.688524590163933,11.229508196721312,7.9508196721311455,15.819672131147538,4.344262295081971,16.0655737704918,15.655737704918028,6.229508196721308,17.5409836065573
COFBb	chr8	NonIntact	helitron	16.47540983606557,14.426229508196725,16.967213114754095,16.967213114754095,16.967213114754095,16.967213114754095,13.852459016393446,11.80327868852459,11.967213114754099,17.04918032786885,9.672131147540982,21.065573770491806,14.344262295081972,18.852459016
COFBb	chr8	NonIntact	hAT_TIR_transposon	15.49180327868852,15.901639344262291,15.901639344262291,5.245901639344258,10.40983606557377,18.196721311475407,18.934426229508194,12.622950819672134,7.704918032786884,7.868852459016391,20.983606557377048,22.131147540983605,16.0655737704918,11.311475409836
COFBb	chr8	NonIntact	Copia_LTR_retrotransposon	15.737704918032781,16.967213114754095,12.049180327868855,8.770491803278686,16.557377049180324,15.245901639344268,18.688524590163933,7.786885245901637,20.491803278688526,9.836065573770492,10.40983606557377,20.40983606557377,12.704918032786887,10.4918032786
COFBb	chr8	NonIntact	Tc1_Mariner_TIR_transposon	8.60655737704918,10.491803278688524,13.688524590163937,15.163934426229511,19.01639344262295,15.327868852459021,19.672131147540984,20.573770491803277,20.0,4.426229508196726,15.409836065573767,5.737704918032783,4.8360655737704965,23.032786885245905,17.786885245901637,17.786885245901637,20.327868852459016,17.21311475409836,18.196721311475407,24.34426229508197,11.229508196721312,12.868852459016395,16…
COFBb	chr8	NonIntact	PIF_Harbinger_TIR_transposon	13.032786885245905,8.852459016393441,19.59016393442623,15.737704918032781,18.278688524590162,18.688524590163933,13.606557377049183,21.065573770491806,11.065573770491802,19.672131147540984,7.213114754098358,13.606557377049183,10.327868852459018,20.573770491803277,21.393442622950822,24.50819672131148,11.475409836065575,17.62295081967213,11.967213114754099,21.557377049180328,21.393442622950822,19.59…
COFBb	chr8	NonIntact	Gypsy_LTR_retrotransposon	15.655737704918028,11.557377049180328,10.0,17.377049180327866,7.704918032786884,18.688524590163933,4.672131147540988,15.245901639344268,7.459016393442621,7.868852459016391,16.72131147540983,24.34426229508197,23.68852459016394,5.1639344262295035,7.37704918
COFBb	chr9	NonIntact	Mutator_TIR_transposon	14.098360655737707,14.426229508196725,14.91803278688525,14.098360655737707,14.754098360655743,14.344262295081972,14.344262295081972,14.344262295081972,14.098360655737707,13.934426229508201,13.934426229508201,14.016393442622954,14.180327868852462,11.639344
COFBb	chr9	NonIntact	LTR_retrotransposon	8.852459016393441,0.6557377049180333,0.6557377049180333,2.1311475409836085,1.8032786885245917,1.5573770491803294,0.6557377049180333,2.213114754098363,15.000000000000004,7.377049180327866,12.622950819672134,7.04918032786885,7.213114754098358,13.93442622950
COFBb	chr9	NonIntact	Copia_LTR_retrotransposon	16.72131147540983,15.983606557377046,7.04918032786885,11.147540983606559,10.573770491803279,15.000000000000004,15.000000000000004,16.0655737704918,6.229508196721308,10.901639344262296,2.95081967213115,2.2950819672131164,22.868852459016395,12.1311475409836
COFBb	chr9	NonIntact	CACTA_TIR_transposon	21.393442622950822,19.262295081967213,18.360655737704917,20.245901639344265,20.491803278688526,19.672131147540984,20.327868852459016,13.442622950819676,7.459016393442621,7.786885245901637,16.31147540983606,2.1311475409836085,22.78688524590164,11.721311475
COFBb	chr9	NonIntact	helitron	16.31147540983606,23.68852459016394,15.573770491803273,17.704918032786882,15.655737704918028,7.622950819672129,10.40983606557377,10.327868852459018,12.95081967213115,13.278688524590166,18.606557377049178,11.639344262295085,15.163934426229511,16.0655737704
COFBb	chr9	NonIntact	hAT_TIR_transposon	10.0,18.524590163934423,10.98360655737705,8.852459016393441,7.213114754098358,2.622950819672133,15.327868852459021,5.081967213114759,21.393442622950822,18.196721311475407,18.524590163934423,15.000000000000004,14.262295081967215,4.180327868852463,3.6885245
COFBb	chr9	NonIntact	Gypsy_LTR_retrotransposon	5.49180327868852,20.81967213114754,17.950819672131143,15.49180327868852,6.6393442622950785,18.0327868852459,9.508196721311474,10.0,14.344262295081972,16.63934426229508,14.91803278688525,17.29508196721311,15.245901639344268,16.803278688524586,4.42622950819
COFBb	chr9	NonIntact	Tc1_Mariner_TIR_transposon	21.065573770491806,15.409836065573767,3.688524590163938,6.229508196721308,3.1967213114754123,15.655737704918028,18.770491803278688,17.86885245901639,15.901639344262291,23.114754098360656,11.557377049180328,23.60655737704918,17.29508196721311,14.672131147540988,12.95081967213115,11.721311475409838,22.70491803278689,23.68852459016394,17.86885245901639,17.377049180327866,18.524590163934423,17.377049…
COFBb	chr9	NonIntact	PIF_Harbinger_TIR_transposon	22.295081967213118,20.737704918032787,14.016393442622954,17.62295081967213,23.68852459016394,22.95081967213115,14.672131147540988,18.688524590163933,17.45901639344262,7.213114754098358,15.49180327868852,16.967213114754095,21.475409836065577,22.95081967213
COFBb	chrX	NonIntact	Mutator_TIR_transposon	16.885245901639344,14.262295081967215,21.9672131147541,17.786885245901637,19.18032786885246,14.180327868852462,18.770491803278688,7.622950819672129,18.524590163934423,16.147540983606554,15.163934426229511,17.29508196721311,16.557377049180324,9.42622950819
COFBb	chrX	NonIntact	PIF_Harbinger_TIR_transposon	22.213114754098363,15.327868852459021,17.45901639344262,17.86885245901639,20.081967213114755,17.704918032786882,20.901639344262293,23.68852459016394,21.393442622950822,12.54098360655738,14.836065573770496,16.393442622950815,15.655737704918028,11.639344262
COFBb	chrX	NonIntact	Gypsy_LTR_retrotransposon	3.1967213114754123,19.754098360655735,10.573770491803279,7.868852459016391,0.9016393442622959,8.934426229508196,16.967213114754095,11.147540983606559,11.147540983606559,11.885245901639346,19.18032786885246,5.983606557377045,19.18032786885246,12.5409836065
COFBb	chrX	NonIntact	helitron	20.081967213114755,11.885245901639346,15.655737704918028,15.983606557377046,12.049180327868855,16.63934426229508,17.540983606557372,20.163934426229506,21.639344262295083,17.540983606557372,8.114754098360654,11.39344262295082,12.131147540983608,14.42622950
COFBb	chrX	NonIntact	Copia_LTR_retrotransposon	14.754098360655743,14.754098360655743,14.836065573770496,14.836065573770496,17.29508196721311,8.934426229508196,18.852459016393443,19.0983606557377,12.37704918032787,13.606557377049183,14.754098360655743,2.1311475409836085,0.0,16.393442622950815,10.0,22.0
COFBb	chrX	NonIntact	LTR_retrotransposon	6.5573770491803245,5.737704918032783,7.295081967213112,11.639344262295085,3.6065573770491834,18.196721311475407,14.262295081967215,23.852459016393446,11.147540983606559,16.885245901639344,20.901639344262293,18.934426229508194,12.786885245901642,14.3442622
COFBb	chrX	NonIntact	CACTA_TIR_transposon	15.000000000000004,17.540983606557372,17.1311475409836,17.04918032786885,21.393442622950822,15.819672131147538,18.360655737704917,21.147540983606557,14.50819672131148,16.0655737704918,13.032786885245905,23.032786885245905,17.62295081967213,21.721311475409
COFBb	chrX	NonIntact	hAT_TIR_transposon	12.868852459016395,16.967213114754095,14.836065573770496,10.573770491803279,19.18032786885246,3.524590163934429,14.91803278688525,19.262295081967213,11.967213114754099,21.557377049180328,18.278688524590162,19.508196721311474,21.721311475409834,18.11475409
COFBb	chrX	NonIntact	Tc1_Mariner_TIR_transposon	22.131147540983605,15.163934426229511,12.868852459016395,3.688524590163938,10.40983606557377,5.573770491803274,16.803278688524586,12.704918032786887,18.688524590163933,13.934426229508201,21.393442622950822,13.196721311475413,17.45901639344262,20.983606557377048,9.508196721311474,20.327868852459016,13.196721311475413,8.934426229508196,18.196721311475407,16.393442622950815,6.147540983606554,17.7868…
COSVa	chr1	NonIntact	Mutator_TIR_transposon	13.934426229508201,13.934426229508201,13.934426229508201,13.934426229508201,14.098360655737707,14.098360655737707,14.016393442622954,14.016393442622954,14.016393442622954,14.016393442622954,14.016393442622954,14.016393442622954,14.016393442622954,14.01639
COSVa	chr1	NonIntact	Tc1_Mariner_TIR_transposon	12.213114754098363,12.295081967213116,11.80327868852459,12.131147540983608,11.967213114754099,12.131147540983608,11.721311475409838,11.967213114754099,12.54098360655738,12.049180327868855,11.885245901639346,12.295081967213116,11.721311475409838,12.704918032786887,16.63934426229508,18.934426229508194,19.918032786885245,12.049180327868855,11.475409836065575,12.213114754098363,12.295081967213116,11.…
COSVa	chr1	NonIntact	helitron	15.081967213114758,15.901639344262291,21.311475409836063,9.344262295081966,13.36065573770492,23.114754098360656,24.016393442622952,4.590163934426233,17.786885245901637,13.606557377049183,19.83606557377049,12.213114754098363,9.426229508196721,19.3442622950
COSVa	chr1	NonIntact	CACTA_TIR_transposon	17.04918032786885,21.885245901639347,20.983606557377048,17.29508196721311,18.934426229508194,16.72131147540983,20.40983606557377,16.393442622950815,13.114754098360658,19.83606557377049,13.032786885245905,21.803278688524593,20.655737704918035,8.36065573770
COSVa	chr1	NonIntact	hAT_TIR_transposon	18.196721311475407,5.983606557377045,4.426229508196726,16.31147540983606,16.147540983606554,5.000000000000004,9.918032786885245,6.6393442622950785,19.18032786885246,11.721311475409838,15.901639344262291,20.983606557377048,13.770491803278691,10.49180327868
COSVa	chr1	NonIntact	LTR_retrotransposon	4.016393442622954,2.7049180327868876,3.2786885245901667,4.754098360655742,5.000000000000004,2.622950819672133,3.2786885245901667,5.327868852459011,9.918032786885245,13.442622950819676,15.163934426229511,12.95081967213115,10.98360655737705,6.06557377049179
COSVa	chr1	NonIntact	Copia_LTR_retrotransposon	9.180327868852459,3.9344262295082,5.573770491803274,5.573770491803274,9.262295081967212,1.2295081967213126,17.04918032786885,17.950819672131143,12.459016393442624,14.50819672131148,16.72131147540983,13.606557377049183,2.95081967213115,4.590163934426233,13
COSVa	chr1	NonIntact	PIF_Harbinger_TIR_transposon	9.426229508196721,14.180327868852462,13.36065573770492,13.770491803278691,16.0655737704918,17.540983606557372,13.934426229508201,18.852459016393443,12.295081967213116,15.409836065573767,14.098360655737707,14.91803278688525,19.918032786885245,21.0655737704
COSVa	chr1	NonIntact	Gypsy_LTR_retrotransposon	14.836065573770496,19.18032786885246,5.573770491803274,5.49180327868852,20.737704918032787,4.098360655737708,0.9016393442622959,17.45901639344262,11.80327868852459,13.688524590163937,21.885245901639347,19.42622950819672,3.7704918032786923,5.73770491803278
COSVa	chr2	NonIntact	Gypsy_LTR_retrotransposon	11.065573770491802,8.196721311475407,11.065573770491802,21.311475409836063,11.065573770491802,20.81967213114754,16.0655737704918,17.62295081967213,2.2950819672131164,6.885245901639341,21.475409836065577,16.803278688524586,14.836065573770496,10.16393442622
COSVa	chr2	NonIntact	Mutator_TIR_transposon	13.934426229508201,13.934426229508201,13.934426229508201,13.934426229508201,14.016393442622954,14.016393442622954,13.934426229508201,13.934426229508201,13.934426229508201,13.934426229508201,13.934426229508201,13.934426229508201,13.934426229508201,13.93442
COSVa	chr2	NonIntact	Tc1_Mariner_TIR_transposon	11.967213114754099,11.80327868852459,12.37704918032787,12.131147540983608,12.54098360655738,11.885245901639346,14.016393442622954,11.80327868852459,11.721311475409838,12.295081967213116,11.80327868852459,11.229508196721312,11.721311475409838,11.721311475409838,11.967213114754099,12.37704918032787,12.459016393442624,12.049180327868855,12.213114754098363,12.131147540983608,12.459016393442624,12.622…
COSVa	chr2	NonIntact	CACTA_TIR_transposon	6.147540983606554,0.6557377049180333,10.081967213114753,0.40983606557377084,7.213114754098358,1.2295081967213126,14.180327868852462,20.40983606557377,14.180327868852462,20.40983606557377,13.36065573770492,9.836065573770492,9.262295081967212,14.42622950819
COSVa	chr2	NonIntact	hAT_TIR_transposon	15.655737704918028,13.36065573770492,12.622950819672134,3.360655737704921,18.0327868852459,3.9344262295082,18.0327868852459,3.9344262295082,3.360655737704921,18.0327868852459,3.360655737704921,18.0327868852459,3.360655737704921,10.901639344262296,11.63934
COSVa	chr2	NonIntact	LTR_retrotransposon	1.2295081967213126,2.7049180327868876,8.688524590163933,3.7704918032786923,0.0,4.426229508196726,5.737704918032783,3.6065573770491834,5.901639344262291,12.622950819672134,1.8852459016393461,1.2295081967213126,2.377049180327871,8.934426229508196,15.0819672
COSVa	chr2	NonIntact	helitron	15.327868852459021,13.114754098360658,13.114754098360658,15.327868852459021,11.39344262295082,19.508196721311474,14.50819672131148,14.50819672131148,18.360655737704917,14.016393442622954,21.721311475409834,23.60655737704918,15.409836065573767,12.704918032
COSVa	chr2	NonIntact	Copia_LTR_retrotransposon	18.770491803278688,18.852459016393443,18.770491803278688,11.229508196721312,6.803278688524587,22.37704918032787,22.78688524590164,15.573770491803273,20.901639344262293,12.213114754098363,5.245901639344258,13.442622950819676,1.6393442622950833,6.5573770491
COSVa	chr2	NonIntact	PIF_Harbinger_TIR_transposon	13.032786885245905,6.803278688524587,8.442622950819672,21.147540983606557,15.655737704918028,11.475409836065575,16.47540983606557,8.770491803278686,7.213114754098358,14.262295081967215,22.459016393442624,19.18032786885246,7.786885245901637,8.9344262295081
COSVa	chr3	NonIntact	Tc1_Mariner_TIR_transposon	11.967213114754099,11.721311475409838,11.80327868852459,12.54098360655738,12.54098360655738,12.622950819672134,11.639344262295085,12.131147540983608,12.213114754098363,12.459016393442624,11.967213114754099,12.786885245901642,12.459016393442624,12.213114754098363,11.80327868852459,12.295081967213116,13.688524590163937,17.62295081967213,15.901639344262291,11.475409836065575,16.885245901639344,16.63…
COSVa	chr3	NonIntact	Mutator_TIR_transposon	14.098360655737707,14.098360655737707,14.098360655737707,14.262295081967215,14.016393442622954,14.262295081967215,13.852459016393446,13.852459016393446,13.852459016393446,13.852459016393446,13.852459016393446,13.852459016393446,13.852459016393446,13.85245
COSVa	chr3	NonIntact	helitron	12.459016393442624,15.163934426229511,16.72131147540983,20.327868852459016,15.000000000000004,20.245901639344265,14.590163934426233,15.983606557377046,21.557377049180328,16.885245901639344,12.049180327868855,17.86885245901639,9.59016393442623,15.983606557
COSVa	chr3	NonIntact	hAT_TIR_transposon	13.934426229508201,13.196721311475413,9.344262295081966,18.0327868852459,16.393442622950815,8.852459016393441,14.590163934426233,16.967213114754095,21.475409836065577,24.50819672131148,17.786885245901637,22.54098360655738,9.344262295081966,17.049180327868
COSVa	chr3	NonIntact	Gypsy_LTR_retrotransposon	18.0327868852459,17.377049180327866,10.40983606557377,17.540983606557372,20.40983606557377,0.6557377049180333,22.213114754098363,19.754098360655735,21.885245901639347,14.180327868852462,14.098360655737707,16.967213114754095,15.000000000000004,14.672131147
COSVa	chr3	NonIntact	Copia_LTR_retrotransposon	10.655737704918032,18.688524590163933,20.655737704918035,14.672131147540988,9.180327868852459,10.901639344262296,6.721311475409832,18.442622950819672,17.45901639344262,19.01639344262295,6.803278688524587,20.983606557377048,19.0983606557377,15.327868852459
COSVa	chr3	NonIntact	LTR_retrotransposon	16.31147540983606,7.377049180327866,9.098360655737704,14.590163934426233,18.114754098360653,12.459016393442624,16.147540983606554,15.081967213114758,23.032786885245905,10.98360655737705,13.032786885245905,16.393442622950815,16.885245901639344,5.9016393442
COSVa	chr3	NonIntact	CACTA_TIR_transposon	22.213114754098363,11.639344262295085,16.0655737704918,16.31147540983606,18.360655737704917,24.590163934426233,23.852459016393446,17.62295081967213,18.606557377049178,11.147540983606559,2.213114754098363,10.819672131147541,20.901639344262293,21.3114754098
COSVa	chr3	NonIntact	PIF_Harbinger_TIR_transposon	23.27868852459017,16.393442622950815,15.245901639344268,19.83606557377049,22.78688524590164,14.344262295081972,13.524590163934429,9.01639344262295,15.819672131147538,20.573770491803277,16.22950819672131,20.081967213114755,8.196721311475407,21.557377049180
COSVa	chr4	NonIntact	Tc1_Mariner_TIR_transposon	11.967213114754099,12.213114754098363,12.622950819672134,12.213114754098363,12.213114754098363,12.049180327868855,12.622950819672134,12.37704918032787,11.721311475409838,11.721311475409838,12.54098360655738,12.37704918032787,12.131147540983608,12.622950819672134,12.049180327868855,11.39344262295082,12.54098360655738,12.213114754098363,11.967213114754099,11.639344262295085,11.967213114754099,13.44…
COSVa	chr4	NonIntact	Mutator_TIR_transposon	14.344262295081972,14.098360655737707,14.262295081967215,14.262295081967215,14.262295081967215,14.098360655737707,14.098360655737707,14.098360655737707,14.262295081967215,14.262295081967215,14.098360655737707,14.098360655737707,14.098360655737707,14.09836
COSVa	chr4	NonIntact	helitron	10.655737704918032,19.672131147540984,11.147540983606559,20.163934426229506,15.327868852459021,15.327868852459021,17.21311475409836,5.49180327868852,15.573770491803273,14.672131147540988,19.0983606557377,7.295081967213112,14.91803278688525,11.721311475409
COSVa	chr4	NonIntact	CACTA_TIR_transposon	16.147540983606554,18.114754098360653,16.22950819672131,18.0327868852459,15.081967213114758,6.311475409836063,14.672131147540988,21.721311475409834,20.0,14.91803278688525,13.524590163934429,17.704918032786882,17.704918032786882,20.0,3.6065573770491834,18.
COSVa	chr4	NonIntact	hAT_TIR_transposon	15.737704918032781,15.901639344262291,5.737704918032783,15.901639344262291,4.9180327868852505,16.63934426229508,4.426229508196726,15.737704918032781,20.81967213114754,21.9672131147541,13.442622950819676,4.016393442622954,20.901639344262293,14.180327868852
COSVa	chr4	NonIntact	LTR_retrotransposon	8.360655737704915,4.344262295081971,11.557377049180328,16.22950819672131,17.704918032786882,18.688524590163933,5.409836065573766,7.213114754098358,5.327868852459011,14.098360655737707,2.049180327868854,0.32786885245901665,2.049180327868854,9.3442622950819
COSVa	chr4	NonIntact	Copia_LTR_retrotransposon	17.950819672131143,14.262295081967215,17.704918032786882,19.83606557377049,9.180327868852459,2.7049180327868876,18.0327868852459,2.4590163934426252,2.049180327868854,3.7704918032786923,3.7704918032786923,8.524590163934425,9.01639344262295,17.3770491803278
COSVa	chr4	NonIntact	PIF_Harbinger_TIR_transposon	16.803278688524586,15.081967213114758,16.803278688524586,17.1311475409836,18.606557377049178,19.344262295081965,11.147540983606559,13.770491803278691,8.442622950819672,10.901639344262296,22.049180327868854,20.245901639344265,18.934426229508194,12.86885245
COSVa	chr4	NonIntact	Gypsy_LTR_retrotransposon	17.21311475409836,2.1311475409836085,12.704918032786887,10.573770491803279,18.196721311475407,10.655737704918032,1.7213114754098378,4.8360655737704965,4.180327868852463,24.426229508196727,5.573770491803274,15.983606557377046,14.016393442622954,5.327868852
COSVa	chr5	NonIntact	Tc1_Mariner_TIR_transposon	12.049180327868855,12.622950819672134,12.54098360655738,12.37704918032787,12.37704918032787,12.37704918032787,12.131147540983608,11.967213114754099,12.622950819672134,12.622950819672134,12.459016393442624,12.54098360655738,12.131147540983608,11.557377049180328,13.032786885245905,13.36065573770492,12.786885245901642,12.295081967213116,12.54098360655738,12.37704918032787,11.39344262295082,11.721311…
COSVa	chr5	NonIntact	Mutator_TIR_transposon	14.426229508196725,14.262295081967215,14.262295081967215,14.262295081967215,14.262295081967215,14.262295081967215,14.098360655737707,14.098360655737707,14.098360655737707,14.098360655737707,14.016393442622954,14.016393442622954,14.016393442622954,14.01639
COSVa	chr5	NonIntact	Gypsy_LTR_retrotransposon	15.327868852459021,15.081967213114758,15.327868852459021,13.032786885245905,12.95081967213115,17.21311475409836,1.393442622950821,5.901639344262291,4.426229508196726,11.147540983606559,9.098360655737704,13.770491803278691,10.901639344262296,14.42622950819
COSVa	chr5	NonIntact	LTR_retrotransposon	15.245901639344268,20.163934426229506,11.39344262295082,13.688524590163937,6.967213114754096,19.508196721311474,6.065573770491799,3.7704918032786923,18.0327868852459,10.901639344262296,16.72131147540983,11.229508196721312,3.360655737704921,18.032786885245
COSVa	chr5	NonIntact	Copia_LTR_retrotransposon	12.622950819672134,13.114754098360658,13.688524590163937,18.442622950819672,10.901639344262296,5.000000000000004,22.295081967213118,7.131147540983603,16.63934426229508,13.934426229508201,22.049180327868854,16.803278688524586,21.639344262295083,10.98360655
COSVa	chr5	NonIntact	hAT_TIR_transposon	5.245901639344258,14.426229508196725,4.9180327868852505,21.393442622950822,18.688524590163933,14.50819672131148,11.721311475409838,10.40983606557377,9.672131147540982,7.786885245901637,18.114754098360653,16.72131147540983,24.016393442622952,20.65573770491
COSVa	chr5	NonIntact	PIF_Harbinger_TIR_transposon	16.393442622950815,9.344262295081966,16.22950819672131,14.262295081967215,22.37704918032787,12.295081967213116,16.393442622950815,11.39344262295082,10.655737704918032,16.147540983606554,10.0,21.065573770491806,19.83606557377049,23.524590163934427,14.016393442622954,9.344262295081966,17.540983606557372,24.34426229508197,15.000000000000004,20.491803278688526,9.918032786885245,20.327868852459016,19.…
COSVa	chr5	NonIntact	helitron	6.721311475409832,8.770491803278686,10.737704918032788,12.459016393442624,15.901639344262291,15.901639344262291,21.557377049180328,21.721311475409834,12.459016393442624,13.524590163934429,18.934426229508194,15.819672131147538,4.016393442622954,21.39344262
COSVa	chr5	NonIntact	CACTA_TIR_transposon	18.606557377049178,17.29508196721311,16.72131147540983,1.9672131147541,12.459016393442624,24.590163934426233,16.885245901639344,17.1311475409836,22.131147540983605,16.393442622950815,21.229508196721312,11.065573770491802,21.147540983606557,12.213114754098
COSVa	chr6	NonIntact	Tc1_Mariner_TIR_transposon	12.131147540983608,12.37704918032787,11.967213114754099,12.213114754098363,11.721311475409838,12.459016393442624,12.54098360655738,11.639344262295085,11.80327868852459,11.721311475409838,11.885245901639346,11.967213114754099,12.131147540983608,11.967213114754099,12.213114754098363,12.213114754098363,11.885245901639346,11.967213114754099,12.37704918032787,11.721311475409838,12.213114754098363,12.2…
COSVa	chr6	NonIntact	Mutator_TIR_transposon	13.934426229508201,14.016393442622954,14.016393442622954,14.016393442622954,14.098360655737707,14.098360655737707,14.344262295081972,14.426229508196725,14.016393442622954,13.770491803278691,13.852459016393446,13.852459016393446,14.016393442622954,14.18032
COSVa	chr6	NonIntact	LTR_retrotransposon	3.9344262295082,4.590163934426233,5.327868852459011,9.180327868852459,6.393442622950817,4.016393442622954,3.0327868852459043,2.2950819672131164,19.918032786885245,14.016393442622954,8.688524590163933,9.918032786885245,12.049180327868855,11.39344262295082,
COSVa	chr6	NonIntact	hAT_TIR_transposon	4.672131147540988,18.196721311475407,4.426229508196726,14.344262295081972,15.901639344262291,17.786885245901637,13.278688524590166,10.491803278688524,17.62295081967213,12.786885245901642,21.557377049180328,3.2786885245901667,9.836065573770492,10.327868852
COSVa	chr6	NonIntact	CACTA_TIR_transposon	21.393442622950822,16.72131147540983,16.885245901639344,21.065573770491806,12.868852459016395,9.098360655737704,17.377049180327866,17.1311475409836,13.36065573770492,10.245901639344263,5.409836065573766,20.081967213114755,22.295081967213118,17.95081967213
COSVa	chr6	NonIntact	helitron	13.934426229508201,13.032786885245905,9.59016393442623,15.737704918032781,19.754098360655735,17.04918032786885,16.393442622950815,19.42622950819672,23.27868852459017,22.868852459016395,16.147540983606554,21.393442622950822,16.885245901639344,16.2295081967
COSVa	chr6	NonIntact	Copia_LTR_retrotransposon	17.704918032786882,17.62295081967213,9.180327868852459,6.803278688524587,3.1967213114754123,5.573770491803274,17.786885245901637,3.688524590163938,18.524590163934423,5.327868852459011,8.770491803278686,22.459016393442624,20.573770491803277,16.557377049180
COSVa	chr6	NonIntact	Gypsy_LTR_retrotransposon	10.737704918032788,4.9180327868852505,4.344262295081971,6.721311475409832,18.852459016393443,4.9180327868852505,5.245901639344258,3.1967213114754123,3.4426229508196755,22.78688524590164,12.95081967213115,2.1311475409836085,9.01639344262295,16.065573770491
COSVa	chr6	NonIntact	PIF_Harbinger_TIR_transposon	18.114754098360653,13.36065573770492,9.344262295081966,14.672131147540988,16.31147540983606,8.934426229508196,14.180327868852462,13.524590163934429,19.918032786885245,20.491803278688526,11.065573770491802,21.065573770491806,24.262295081967217,20.655737704918035,19.262295081967213,10.0,15.245901639344268,9.672131147540982,13.278688524590166,15.409836065573767,13.278688524590166,24.262295081967217,…
COSVa	chr7	NonIntact	Mutator_TIR_transposon	14.016393442622954,13.442622950819676,13.442622950819676,14.098360655737707,14.098360655737707,14.098360655737707,14.098360655737707,14.098360655737707,13.770491803278691,13.770491803278691,13.770491803278691,13.770491803278691,13.770491803278691,13.60655
COSVa	chr7	NonIntact	helitron	15.49180327868852,15.573770491803273,14.672131147540988,14.672131147540988,14.754098360655743,17.21311475409836,15.081967213114758,23.442622950819676,14.754098360655743,16.31147540983606,14.590163934426233,16.393442622950815,15.245901639344268,17.95081967
COSVa	chr7	NonIntact	CACTA_TIR_transposon	20.491803278688526,20.573770491803277,21.393442622950822,17.29508196721311,21.475409836065577,17.29508196721311,13.524590163934429,22.049180327868854,16.147540983606554,20.40983606557377,9.344262295081966,11.147540983606559,8.278688524590162,10.0,17.13114
COSVa	chr7	NonIntact	hAT_TIR_transposon	3.360655737704921,3.360655737704921,3.1147540983606588,18.196721311475407,2.8688524590163964,18.196721311475407,15.573770491803273,14.50819672131148,14.836065573770496,15.081967213114758,7.213114754098358,14.590163934426233,5.573770491803274,2.45901639344
COSVa	chr7	NonIntact	Tc1_Mariner_TIR_transposon	12.704918032786887,12.295081967213116,11.80327868852459,11.967213114754099,11.885245901639346,11.475409836065575,11.885245901639346,11.475409836065575,12.37704918032787,11.967213114754099,12.213114754098363,11.967213114754099,11.639344262295085,11.721311475409838,12.54098360655738,12.622950819672134,13.442622950819676,11.967213114754099,12.95081967213115,19.754098360655735,14.91803278688525,14.26…
COSVa	chr7	NonIntact	LTR_retrotransposon	2.95081967213115,2.7049180327868876,9.098360655737704,3.7704918032786923,0.0,6.5573770491803245,8.278688524590162,3.852459016393446,5.655737704918029,2.213114754098363,2.786885245901642,2.7049180327868876,9.098360655737704,20.327868852459016,5.08196721311
COSVa	chr7	NonIntact	Copia_LTR_retrotransposon	11.639344262295085,19.754098360655735,11.639344262295085,20.491803278688526,21.475409836065577,21.639344262295083,16.803278688524586,19.672131147540984,22.54098360655738,20.81967213114754,20.245901639344265,19.508196721311474,16.0655737704918,17.459016393
COSVa	chr7	NonIntact	Gypsy_LTR_retrotransposon	14.016393442622954,15.983606557377046,20.0,15.000000000000004,9.098360655737704,21.229508196721312,20.737704918032787,3.4426229508196755,3.1967213114754123,15.081967213114758,1.393442622950821,3.6065573770491834,5.081967213114759,3.852459016393446,18.8524
COSVa	chr7	NonIntact	PIF_Harbinger_TIR_transposon	15.49180327868852,12.37704918032787,22.213114754098363,3.7704918032786923,12.295081967213116,23.114754098360656,20.40983606557377,16.72131147540983,10.245901639344263,14.098360655737707,7.295081967213112,14.016393442622954,10.819672131147541,22.049180327868854,16.885245901639344,13.114754098360658,23.36065573770492,18.0327868852459,14.262295081967215,17.04918032786885,18.0327868852459,10.73770491…
COSVa	chr8	NonIntact	Gypsy_LTR_retrotransposon	13.114754098360658,13.114754098360658,13.114754098360658,13.114754098360658,13.114754098360658,24.34426229508197,18.606557377049178,2.377049180327871,1.8032786885245917,12.786885245901642,10.0,6.5573770491803245,18.934426229508194,16.885245901639344,13.44
COSVa	chr8	NonIntact	Mutator_TIR_transposon	13.36065573770492,16.31147540983606,13.852459016393446,13.36065573770492,16.31147540983606,13.852459016393446,13.36065573770492,16.31147540983606,13.852459016393446,13.36065573770492,16.31147540983606,13.852459016393446,13.36065573770492,16.31147540983606
COSVa	chr8	NonIntact	CACTA_TIR_transposon	6.393442622950817,1.6393442622950833,6.393442622950817,1.6393442622950833,6.393442622950817,1.6393442622950833,6.393442622950817,1.6393442622950833,6.393442622950817,1.6393442622950833,20.0,17.1311475409836,18.688524590163933,14.91803278688525,21.39344262
COSVa	chr8	NonIntact	helitron	10.0,9.098360655737704,14.836065573770496,15.081967213114758,13.770491803278691,13.688524590163937,13.032786885245905,13.032786885245905,22.622950819672134,10.573770491803279,20.163934426229506,10.901639344262296,20.0,12.622950819672134,21.885245901639347
COSVa	chr8	NonIntact	LTR_retrotransposon	7.622950819672129,6.393442622950817,6.5573770491803245,18.934426229508194,6.6393442622950785,5.819672131147537,1.8852459016393461,5.409836065573766,6.5573770491803245,3.360655737704921,7.9508196721311455,3.4426229508196755,4.180327868852463,16.22950819672
COSVa	chr8	NonIntact	hAT_TIR_transposon	14.344262295081972,10.737704918032788,17.1311475409836,18.196721311475407,3.6065573770491834,18.196721311475407,3.360655737704921,3.6065573770491834,3.6065573770491834,17.21311475409836,15.737704918032781,15.901639344262291,15.245901639344268,12.131147540
COSVa	chr8	NonIntact	Copia_LTR_retrotransposon	15.245901639344268,17.21311475409836,23.68852459016394,20.245901639344265,24.180327868852462,17.21311475409836,6.065573770491799,18.0327868852459,12.54098360655738,17.377049180327866,6.393442622950817,21.065573770491806,12.95081967213115,8.278688524590162
COSVa	chr8	NonIntact	PIF_Harbinger_TIR_transposon	24.016393442622952,17.21311475409836,12.54098360655738,22.95081967213115,2.049180327868854,23.524590163934427,10.901639344262296,11.967213114754099,15.081967213114758,10.573770491803279,22.049180327868854,7.213114754098358,14.426229508196725,19.672131147540984,13.278688524590166,13.770491803278691,13.770491803278691,22.37704918032787,10.327868852459018,20.983606557377048,16.31147540983606,11.6393…
COSVa	chr8	NonIntact	Tc1_Mariner_TIR_transposon	21.147540983606557,16.72131147540983,7.9508196721311455,9.918032786885245,10.901639344262296,10.737704918032788,23.60655737704918,10.573770491803279,14.344262295081972,19.672131147540984,10.0,12.868852459016395,20.491803278688526,19.01639344262295,4.590163934426233,0.98360655737705,1.8032786885245917,3.7704918032786923,7.295081967213112,18.606557377049178,22.54098360655738,6.6393442622950785,5.98…
COSVa	chr9	NonIntact	Tc1_Mariner_TIR_transposon	11.80327868852459,12.704918032786887,12.37704918032787,11.721311475409838,11.967213114754099,12.37704918032787,12.459016393442624,12.37704918032787,11.721311475409838,12.131147540983608,11.885245901639346,11.885245901639346,12.213114754098363,13.36065573770492,11.80327868852459,10.40983606557377,18.934426229508194,22.54098360655738,15.163934426229511,12.786885245901642,13.032786885245905,15.57377…
COSVa	chr9	NonIntact	Mutator_TIR_transposon	13.852459016393446,14.262295081967215,13.770491803278691,13.770491803278691,13.770491803278691,13.770491803278691,13.770491803278691,13.770491803278691,13.770491803278691,13.770491803278691,13.770491803278691,13.770491803278691,13.770491803278691,13.77049
COSVa	chr9	NonIntact	LTR_retrotransposon	9.098360655737704,2.377049180327871,1.7213114754098378,2.622950819672133,2.4590163934426252,16.393442622950815,14.262295081967215,10.0,10.327868852459018,6.721311475409832,2.7049180327868876,4.590163934426233,10.491803278688524,1.2295081967213126,0.655737
COSVa	chr9	NonIntact	Copia_LTR_retrotransposon	14.590163934426233,7.868852459016391,10.40983606557377,20.40983606557377,16.0655737704918,11.475409836065575,10.573770491803279,4.016393442622954,16.557377049180324,5.655737704918029,15.737704918032781,22.868852459016395,4.8360655737704965,2.2131147540983
COSVa	chr9	NonIntact	CACTA_TIR_transposon	16.31147540983606,20.655737704918035,23.524590163934427,15.655737704918028,11.475409836065575,23.27868852459017,20.491803278688526,19.18032786885246,8.934426229508196,8.0327868852459,14.180327868852462,7.131147540983603,22.868852459016395,22.2131147540983
COSVa	chr9	NonIntact	helitron	15.000000000000004,12.049180327868855,24.50819672131148,17.21311475409836,15.901639344262291,13.032786885245905,11.967213114754099,0.8196721311475417,12.049180327868855,15.573770491803273,13.278688524590166,11.229508196721312,2.4590163934426252,2.54098360
COSVa	chr9	NonIntact	hAT_TIR_transposon	18.0327868852459,3.360655737704921,4.426229508196726,12.868852459016395,21.9672131147541,9.754098360655737,7.9508196721311455,20.163934426229506,3.9344262295082,18.606557377049178,4.590163934426233,17.704918032786882,10.655737704918032,11.311475409836067,
COSVa	chr9	NonIntact	Gypsy_LTR_retrotransposon	23.27868852459017,18.606557377049178,15.901639344262291,18.606557377049178,13.032786885245905,13.278688524590166,11.557377049180328,17.704918032786882,1.1475409836065582,11.639344262295085,9.01639344262295,2.8688524590163964,19.344262295081965,5.983606557
COSVa	chr9	NonIntact	PIF_Harbinger_TIR_transposon	17.786885245901637,0.8196721311475417,0.0,13.196721311475413,21.803278688524593,8.524590163934425,8.524590163934425,7.9508196721311455,20.163934426229506,17.540983606557372,4.9180327868852505,23.19672131147541,22.95081967213115,12.131147540983608,8.360655737704915,15.49180327868852,16.147540983606554,22.37704918032787,10.901639344262296,22.049180327868854,7.704918032786884,8.278688524590162,14.09…
COSVa	chrX	NonIntact	Tc1_Mariner_TIR_transposon	12.213114754098363,12.295081967213116,12.213114754098363,12.213114754098363,12.131147540983608,12.049180327868855,11.967213114754099,11.557377049180328,12.213114754098363,12.459016393442624,12.704918032786887,12.622950819672134,12.95081967213115,11.721311475409838,11.475409836065575,12.049180327868855,12.37704918032787,12.786885245901642,12.54098360655738,12.622950819672134,12.786885245901642,12.…
COSVa	chrX	NonIntact	Mutator_TIR_transposon	14.016393442622954,14.016393442622954,14.016393442622954,14.016393442622954,14.016393442622954,14.016393442622954,14.016393442622954,14.016393442622954,14.016393442622954,14.016393442622954,14.262295081967215,14.262295081967215,13.852459016393446,13.85245
COSVa	chrX	NonIntact	Gypsy_LTR_retrotransposon	4.9180327868852505,2.377049180327871,5.655737704918029,16.885245901639344,9.426229508196721,10.901639344262296,5.573770491803274,4.590163934426233,9.672131147540982,15.245901639344268,19.918032786885245,9.672131147540982,7.868852459016391,5.49180327868852
COSVa	chrX	NonIntact	LTR_retrotransposon	6.311475409836063,21.393442622950822,21.393442622950822,9.098360655737704,21.639344262295083,12.54098360655738,6.4754098360655705,18.688524590163933,11.721311475409838,5.409836065573766,6.967213114754096,14.262295081967215,12.786885245901642,16.8852459016
COSVa	chrX	NonIntact	hAT_TIR_transposon	3.6065573770491834,18.0327868852459,3.6065573770491834,18.0327868852459,9.754098360655737,14.098360655737707,12.868852459016395,16.967213114754095,3.360655737704921,14.836065573770496,10.737704918032788,19.18032786885246,3.524590163934429,15.9836065573770
COSVa	chrX	NonIntact	CACTA_TIR_transposon	20.983606557377048,14.672131147540988,21.065573770491806,14.672131147540988,16.557377049180324,22.459016393442624,15.163934426229511,16.967213114754095,16.885245901639344,13.770491803278691,7.295081967213112,15.245901639344268,17.540983606557372,17.131147
COSVa	chrX	NonIntact	helitron	14.590163934426233,14.590163934426233,20.737704918032787,18.0327868852459,15.819672131147538,7.9508196721311455,14.91803278688525,20.081967213114755,13.934426229508201,15.081967213114758,14.426229508196725,13.934426229508201,11.311475409836067,16.63934426
COSVa	chrX	NonIntact	Copia_LTR_retrotransposon	8.770491803278686,12.786885245901642,3.7704918032786923,14.50819672131148,11.639344262295085,16.72131147540983,6.311475409836063,5.819672131147537,18.0327868852459,8.934426229508196,19.0983606557377,13.770491803278691,20.0,0.0,5.737704918032783,16.3934426
COSVa	chrX	NonIntact	PIF_Harbinger_TIR_transposon	22.78688524590164,15.327868852459021,17.45901639344262,17.86885245901639,18.770491803278688,16.885245901639344,9.836065573770492,18.360655737704917,17.377049180327866,11.967213114754099,21.885245901639347,20.491803278688526,19.262295081967213,18.770491803
COSVb	chr1	NonIntact	Mutator_TIR_transposon	14.836065573770496,14.50819672131148,14.672131147540988,15.327868852459021,15.000000000000004,15.163934426229511,14.262295081967215,14.426229508196725,11.885245901639346,14.672131147540988,14.672131147540988,23.27868852459017,14.91803278688525,14.67213114
COSVb	chr1	NonIntact	Copia_LTR_retrotransposon	7.213114754098358,14.180327868852462,5.409836065573766,7.786885245901637,23.852459016393446,8.0327868852459,23.68852459016394,22.95081967213115,18.770491803278688,7.786885245901637,7.213114754098358,3.9344262295082,5.327868852459011,11.557377049180328,7.7
COSVb	chr1	NonIntact	hAT_TIR_transposon	14.344262295081972,17.21311475409836,17.21311475409836,17.29508196721311,17.04918032786885,9.344262295081966,14.426229508196725,14.91803278688525,12.459016393442624,12.295081967213116,13.524590163934429,10.245901639344263,15.573770491803273,15.90163934426
COSVb	chr1	NonIntact	LTR_retrotransposon	11.639344262295085,12.868852459016395,20.901639344262293,2.1311475409836085,16.803278688524586,12.459016393442624,16.803278688524586,9.01639344262295,3.6065573770491834,14.262295081967215,5.245901639344258,10.327868852459018,4.754098360655742,12.622950819
COSVb	chr1	NonIntact	Gypsy_LTR_retrotransposon	17.704918032786882,17.950819672131143,18.442622950819672,23.032786885245905,24.09836065573771,19.83606557377049,19.42622950819672,18.852459016393443,19.344262295081965,12.37704918032787,14.672131147540988,8.0327868852459,11.639344262295085,20.245901639344
COSVb	chr1	NonIntact	CACTA_TIR_transposon	17.86885245901639,17.786885245901637,18.360655737704917,14.91803278688525,16.31147540983606,14.91803278688525,16.31147540983606,12.622950819672134,16.393442622950815,16.885245901639344,15.000000000000004,17.86885245901639,13.196721311475413,16.96721311475
COSVb	chr1	NonIntact	Tc1_Mariner_TIR_transposon	18.278688524590162,18.114754098360653,18.114754098360653,18.524590163934423,16.885245901639344,22.049180327868854,18.196721311475407,18.196721311475407,22.459016393442624,19.01639344262295,18.360655737704917,18.360655737704917,18.770491803278688,17.049180
COSVb	chr1	NonIntact	helitron	21.393442622950822,1.7213114754098378,2.4590163934426252,1.7213114754098378,6.311475409836063,14.91803278688525,20.163934426229506,15.573770491803273,10.40983606557377,11.065573770491802,11.065573770491802,11.065573770491802,11.065573770491802,11.06557377
COSVb	chr1	NonIntact	PIF_Harbinger_TIR_transposon	21.065573770491806,12.131147540983608,16.22950819672131,21.803278688524593,13.032786885245905,20.327868852459016,23.68852459016394,23.60655737704918,9.508196721311474,5.573770491803274,13.114754098360658,16.0655737704918,19.918032786885245,13.934426229508
COSVb	chr2	NonIntact	Gypsy_LTR_retrotransposon	11.39344262295082,14.590163934426233,10.163934426229508,14.590163934426233,18.0327868852459,15.901639344262291,10.163934426229508,20.0,14.91803278688525,17.540983606557372,3.688524590163938,16.0655737704918,17.62295081967213,10.0,15.000000000000004,22.295
COSVb	chr2	NonIntact	LTR_retrotransposon	8.0327868852459,1.8852459016393461,0.5737704918032791,1.6393442622950833,3.360655737704921,4.426229508196726,8.360655737704915,8.770491803278686,3.4426229508196755,2.622950819672133,11.721311475409838,6.967213114754096,9.180327868852459,6.311475409836063,
COSVb	chr2	NonIntact	Mutator_TIR_transposon	13.278688524590166,15.000000000000004,13.278688524590166,14.91803278688525,14.91803278688525,14.672131147540988,14.91803278688525,14.91803278688525,5.245901639344258,15.000000000000004,14.754098360655743,14.91803278688525,14.590163934426233,14.83606557377
COSVb	chr2	NonIntact	CACTA_TIR_transposon	1.3114754098360666,0.7377049180327875,0.8196721311475417,15.819672131147538,15.983606557377046,16.47540983606557,14.91803278688525,16.47540983606557,14.91803278688525,15.819672131147538,15.983606557377046,17.86885245901639,14.672131147540988,17.6229508196
COSVb	chr2	NonIntact	hAT_TIR_transposon	13.278688524590166,17.377049180327866,8.442622950819672,17.540983606557372,8.688524590163933,17.540983606557372,17.21311475409836,11.967213114754099,17.21311475409836,17.21311475409836,14.590163934426233,10.327868852459018,13.196721311475413,17.4590163934
COSVb	chr2	NonIntact	Copia_LTR_retrotransposon	7.9508196721311455,5.901639344262291,5.901639344262291,6.393442622950817,8.852459016393441,7.9508196721311455,13.196721311475413,10.573770491803279,7.704918032786884,21.475409836065577,17.786885245901637,22.37704918032787,21.885245901639347,21.06557377049
COSVb	chr2	NonIntact	Tc1_Mariner_TIR_transposon	18.442622950819672,19.01639344262295,19.01639344262295,18.442622950819672,18.770491803278688,18.770491803278688,21.147540983606557,19.344262295081965,11.311475409836067,19.01639344262295,15.655737704918028,23.19672131147541,24.50819672131148,17.4590163934
COSVb	chr2	NonIntact	helitron	1.7213114754098378,2.4590163934426252,2.1311475409836085,1.7213114754098378,13.606557377049183,14.344262295081972,5.655737704918029,2.4590163934426252,5.901639344262291,22.295081967213118,18.770491803278688,19.508196721311474,11.721311475409838,20.7377049
COSVb	chr2	NonIntact	PIF_Harbinger_TIR_transposon	6.803278688524587,9.508196721311474,24.180327868852462,22.37704918032787,23.27868852459017,12.049180327868855,13.032786885245905,10.573770491803279,16.393442622950815,21.803278688524593,19.18032786885246,8.770491803278686,8.934426229508196,8.0327868852459
COSVb	chr3	NonIntact	Mutator_TIR_transposon	14.672131147540988,5.573770491803274,14.836065573770496,15.000000000000004,15.327868852459021,15.000000000000004,15.081967213114758,15.983606557377046,15.000000000000004,15.081967213114758,14.672131147540988,14.836065573770496,14.91803278688525,11.1475409
COSVb	chr3	NonIntact	hAT_TIR_transposon	17.04918032786885,17.04918032786885,16.0655737704918,16.0655737704918,12.131147540983608,9.672131147540982,12.704918032786887,12.786885245901642,16.0655737704918,14.50819672131148,10.491803278688524,12.37704918032787,14.426229508196725,18.278688524590162,
COSVb	chr3	NonIntact	Tc1_Mariner_TIR_transposon	18.114754098360653,18.114754098360653,19.262295081967213,17.950819672131143,18.278688524590162,21.147540983606557,15.819672131147538,16.967213114754095,18.196721311475407,17.45901639344262,19.59016393442623,22.70491803278689,18.360655737704917,18.36065573
COSVb	chr3	NonIntact	CACTA_TIR_transposon	15.327868852459021,16.63934426229508,15.327868852459021,16.63934426229508,2.049180327868854,2.8688524590163964,12.37704918032787,16.557377049180324,15.573770491803273,16.557377049180324,15.573770491803273,8.688524590163933,3.9344262295082,4.18032786885246
COSVb	chr3	NonIntact	helitron	2.4590163934426252,2.4590163934426252,2.4590163934426252,1.2295081967213126,5.49180327868852,6.6393442622950785,1.2295081967213126,19.918032786885245,19.918032786885245,18.196721311475407,16.47540983606557,9.672131147540982,14.098360655737707,16.803278688
COSVb	chr3	NonIntact	Copia_LTR_retrotransposon	5.49180327868852,4.098360655737708,17.45901639344262,24.50819672131148,18.934426229508194,21.393442622950822,15.081967213114758,10.819672131147541,20.81967213114754,16.967213114754095,15.409836065573767,17.786885245901637,5.819672131147537,6.2295081967213
COSVb	chr3	NonIntact	LTR_retrotransposon	7.04918032786885,18.0327868852459,13.770491803278691,12.622950819672134,14.672131147540988,4.50819672131148,11.721311475409838,17.377049180327866,15.737704918032781,18.524590163934423,17.377049180327866,1.0655737704918042,5.327868852459011,7.3770491803278
COSVb	chr3	NonIntact	Gypsy_LTR_retrotransposon	8.360655737704915,10.40983606557377,21.065573770491806,1.393442622950821,22.622950819672134,17.786885245901637,23.68852459016394,4.9180327868852505,14.180327868852462,14.098360655737707,5.983606557377045,13.934426229508201,10.163934426229508,8.36065573770
COSVb	chr3	NonIntact	PIF_Harbinger_TIR_transposon	18.524590163934423,19.672131147540984,22.54098360655738,21.9672131147541,13.524590163934429,18.770491803278688,20.327868852459016,13.278688524590166,16.967213114754095,16.147540983606554,16.393442622950815,19.01639344262295,16.557377049180324,19.590163934
COSVb	chr4	NonIntact	Mutator_TIR_transposon	14.836065573770496,14.836065573770496,18.278688524590162,14.836065573770496,13.278688524590166,14.836065573770496,15.245901639344268,16.22950819672131,10.0,18.360655737704917,17.21311475409836,16.72131147540983,14.672131147540988,21.557377049180328,19.098
COSVb	chr4	NonIntact	Gypsy_LTR_retrotransposon	9.672131147540982,9.836065573770492,10.40983606557377,7.213114754098358,7.04918032786885,3.9344262295082,2.5409836065573796,18.0327868852459,16.0655737704918,2.213114754098363,4.180327868852463,3.7704918032786923,2.4590163934426252,14.836065573770496,17.3
COSVb	chr4	NonIntact	LTR_retrotransposon	8.196721311475407,2.1311475409836085,4.426229508196726,3.360655737704921,7.131147540983603,2.7049180327868876,6.311475409836063,9.180327868852459,0.98360655737705,12.213114754098363,2.213114754098363,3.524590163934429,8.770491803278686,8.196721311475407,2
COSVb	chr4	NonIntact	hAT_TIR_transposon	7.868852459016391,17.1311475409836,7.868852459016391,17.1311475409836,17.86885245901639,2.5409836065573796,17.21311475409836,7.459016393442621,19.508196721311474,10.081967213114753,14.672131147540988,13.770491803278691,14.426229508196725,18.36065573770491
COSVb	chr4	NonIntact	CACTA_TIR_transposon	16.63934426229508,14.836065573770496,16.63934426229508,14.836065573770496,14.836065573770496,16.803278688524586,21.475409836065577,19.18032786885246,21.9672131147541,17.04918032786885,16.72131147540983,2.5409836065573796,17.29508196721311,18.6885245901639
COSVb	chr4	NonIntact	Tc1_Mariner_TIR_transposon	19.262295081967213,19.262295081967213,19.59016393442623,19.508196721311474,20.0,17.86885245901639,17.950819672131143,16.31147540983606,17.950819672131143,17.1311475409836,16.72131147540983,17.1311475409836,18.688524590163933,18.360655737704917,18.36065573
COSVb	chr4	NonIntact	Copia_LTR_retrotransposon	8.278688524590162,8.60655737704918,5.983606557377045,6.885245901639341,6.885245901639341,8.278688524590162,10.327868852459018,8.60655737704918,2.049180327868854,9.836065573770492,8.60655737704918,19.508196721311474,10.163934426229508,21.803278688524593,15
COSVb	chr4	NonIntact	helitron	2.5409836065573796,2.213114754098363,9.01639344262295,18.606557377049178,18.114754098360653,14.836065573770496,15.901639344262291,11.721311475409838,21.721311475409834,14.836065573770496,15.327868852459021,9.098360655737704,15.819672131147538,18.524590163
COSVb	chr4	NonIntact	PIF_Harbinger_TIR_transposon	13.688524590163937,14.016393442622954,15.163934426229511,16.47540983606557,12.868852459016395,11.147540983606559,8.442622950819672,15.901639344262291,23.032786885245905,17.704918032786882,17.29508196721311,12.622950819672134,19.59016393442623,14.180327868
COSVb	chr5	NonIntact	Mutator_TIR_transposon	15.245901639344268,14.754098360655743,14.590163934426233,14.672131147540988,14.590163934426233,14.672131147540988,15.245901639344268,14.672131147540988,14.590163934426233,14.836065573770496,14.016393442622954,21.229508196721312,14.590163934426233,18.11475
COSVb	chr5	NonIntact	hAT_TIR_transposon	17.377049180327866,8.770491803278686,17.377049180327866,8.770491803278686,17.377049180327866,17.377049180327866,9.098360655737704,6.721311475409832,16.63934426229508,9.180327868852459,3.688524590163938,4.426229508196726,3.1147540983606588,17.6229508196721
COSVb	chr5	NonIntact	Tc1_Mariner_TIR_transposon	18.770491803278688,18.770491803278688,18.524590163934423,18.524590163934423,18.688524590163933,19.01639344262295,15.409836065573767,16.885245901639344,18.524590163934423,18.360655737704917,17.86885245901639,22.37704918032787,19.262295081967213,19.26229508
COSVb	chr5	NonIntact	CACTA_TIR_transposon	15.081967213114758,17.29508196721311,15.081967213114758,17.29508196721311,17.04918032786885,15.245901639344268,17.04918032786885,15.245901639344268,21.9672131147541,15.000000000000004,16.47540983606557,15.000000000000004,10.163934426229508,21.721311475409
COSVb	chr5	NonIntact	helitron	2.4590163934426252,4.672131147540988,2.377049180327871,4.672131147540988,23.19672131147541,2.95081967213115,14.016393442622954,14.098360655737707,20.40983606557377,20.491803278688526,18.114754098360653,23.524590163934427,22.213114754098363,15.245901639344
COSVb	chr5	NonIntact	LTR_retrotransposon	15.409836065573767,13.442622950819676,19.18032786885246,5.409836065573766,13.196721311475413,1.8032786885245917,18.0327868852459,4.9180327868852505,2.622950819672133,4.262295081967217,24.34426229508197,24.34426229508197,10.737704918032788,7.21311475409835
COSVb	chr5	NonIntact	Copia_LTR_retrotransposon	12.868852459016395,14.590163934426233,16.885245901639344,6.721311475409832,10.737704918032788,9.01639344262295,16.803278688524586,6.147540983606554,10.491803278688524,20.163934426229506,13.852459016393446,7.295081967213112,6.5573770491803245,16.8032786885
COSVb	chr5	NonIntact	Gypsy_LTR_retrotransposon	17.29508196721311,10.081967213114753,11.311475409836067,9.344262295081966,4.016393442622954,6.229508196721308,8.442622950819672,11.885245901639346,11.475409836065575,0.8196721311475417,10.655737704918032,8.196721311475407,3.852459016393446,5.0819672131147
COSVb	chr5	NonIntact	PIF_Harbinger_TIR_transposon	18.934426229508194,10.491803278688524,24.09836065573771,16.22950819672131,14.426229508196725,14.262295081967215,17.86885245901639,16.967213114754095,22.622950819672134,21.557377049180328,18.770491803278688,17.29508196721311,20.901639344262293,16.393442622
COSVb	chr6	NonIntact	Mutator_TIR_transposon	14.754098360655743,15.000000000000004,14.754098360655743,15.000000000000004,15.000000000000004,14.91803278688525,5.1639344262295035,14.836065573770496,14.672131147540988,14.91803278688525,14.91803278688525,14.672131147540988,14.91803278688525,15.081967213
COSVb	chr6	NonIntact	hAT_TIR_transposon	17.377049180327866,17.377049180327866,17.377049180327866,6.311475409836063,16.967213114754095,16.967213114754095,17.21311475409836,17.21311475409836,17.21311475409836,17.21311475409836,17.21311475409836,17.21311475409836,17.21311475409836,6.80327868852458
COSVb	chr6	NonIntact	Tc1_Mariner_TIR_transposon	18.360655737704917,18.360655737704917,18.114754098360653,18.196721311475407,18.196721311475407,18.360655737704917,18.360655737704917,18.114754098360653,18.114754098360653,18.360655737704917,18.360655737704917,19.508196721311474,19.262295081967213,9.016393
COSVb	chr6	NonIntact	CACTA_TIR_transposon	15.163934426229511,17.04918032786885,15.163934426229511,17.04918032786885,16.31147540983606,14.91803278688525,1.393442622950821,3.524590163934429,0.9016393442622959,2.786885245901642,3.2786885245901667,4.016393442622954,0.5737704918032791,16.6393442622950
COSVb	chr6	NonIntact	helitron	4.672131147540988,2.5409836065573796,4.672131147540988,1.7213114754098378,2.213114754098363,2.4590163934426252,1.9672131147541,2.4590163934426252,2.4590163934426252,2.7049180327868876,3.9344262295082,2.4590163934426252,3.9344262295082,2.4590163934426252,2
COSVb	chr6	NonIntact	LTR_retrotransposon	8.0327868852459,4.180327868852463,3.360655737704921,16.47540983606557,15.49180327868852,3.7704918032786923,1.3114754098360666,9.01639344262295,4.590163934426233,2.622950819672133,8.442622950819672,4.672131147540988,3.0327868852459043,19.918032786885245,17
COSVb	chr6	NonIntact	Copia_LTR_retrotransposon	8.114754098360654,10.573770491803279,9.262295081967212,5.655737704918029,7.04918032786885,3.4426229508196755,2.8688524590163964,10.40983606557377,14.91803278688525,16.393442622950815,23.36065573770492,7.377049180327866,5.000000000000004,16.0655737704918,7
COSVb	chr6	NonIntact	Gypsy_LTR_retrotransposon	7.295081967213112,7.295081967213112,2.5409836065573796,1.2295081967213126,13.852459016393446,17.29508196721311,17.786885245901637,2.7049180327868876,7.622950819672129,10.819672131147541,16.885245901639344,18.524590163934423,17.950819672131143,18.770491803
COSVb	chr6	NonIntact	PIF_Harbinger_TIR_transposon	16.72131147540983,14.50819672131148,14.016393442622954,1.1475409836065582,17.29508196721311,6.885245901639341,19.344262295081965,11.721311475409838,23.442622950819676,20.0,11.39344262295082,16.22950819672131,19.672131147540984,15.655737704918028,18.934426229508194,22.95081967213115,18.852459016393443,20.327868852459016,18.524590163934423,16.0655737704918,18.360655737704917,20.081967213114755,23.1…
COSVb	chr7	NonIntact	Mutator_TIR_transposon	13.114754098360658,14.91803278688525,14.590163934426233,8.934426229508196,15.081967213114758,14.836065573770496,12.54098360655738,14.836065573770496,13.934426229508201,14.836065573770496,15.163934426229511,14.754098360655743,6.393442622950817,14.918032786
COSVb	chr7	NonIntact	hAT_TIR_transposon	17.04918032786885,17.04918032786885,17.377049180327866,17.377049180327866,17.540983606557372,17.540983606557372,15.901639344262291,15.901639344262291,16.885245901639344,17.21311475409836,17.704918032786882,18.442622950819672,13.442622950819676,16.72131147
COSVb	chr7	NonIntact	Tc1_Mariner_TIR_transposon	18.606557377049178,18.606557377049178,18.524590163934423,18.524590163934423,18.524590163934423,18.524590163934423,16.967213114754095,3.852459016393446,17.29508196721311,21.393442622950822,19.42622950819672,18.524590163934423,18.524590163934423,20.08196721
COSVb	chr7	NonIntact	CACTA_TIR_transposon	15.737704918032781,16.803278688524586,15.737704918032781,16.803278688524586,15.573770491803273,16.803278688524586,15.573770491803273,16.803278688524586,15.245901639344268,17.04918032786885,15.245901639344268,17.04918032786885,15.49180327868852,16.39344262
COSVb	chr7	NonIntact	helitron	4.426229508196726,2.377049180327871,4.426229508196726,5.081967213114759,2.377049180327871,4.426229508196726,4.672131147540988,2.377049180327871,4.672131147540988,0.491803278688525,6.4754098360655705,5.49180327868852,0.491803278688525,7.213114754098358,14.
COSVb	chr7	NonIntact	Copia_LTR_retrotransposon	3.852459016393446,1.8032786885245917,1.8032786885245917,3.4426229508196755,2.622950819672133,3.7704918032786923,10.901639344262296,0.8196721311475417,5.901639344262291,0.8196721311475417,20.573770491803277,23.60655737704918,7.04918032786885,14.09836065573
COSVb	chr7	NonIntact	LTR_retrotransposon	11.147540983606559,5.819672131147537,24.016393442622952,18.524590163934423,7.295081967213112,12.295081967213116,20.327868852459016,19.262295081967213,19.59016393442623,12.786885245901642,15.327868852459021,8.278688524590162,17.950819672131143,17.950819672
COSVb	chr7	NonIntact	Gypsy_LTR_retrotransposon	9.098360655737704,11.639344262295085,22.95081967213115,18.524590163934423,10.573770491803279,15.819672131147538,8.360655737704915,15.000000000000004,19.262295081967213,4.8360655737704965,11.721311475409838,11.967213114754099,9.754098360655737,12.213114754
COSVb	chr7	NonIntact	PIF_Harbinger_TIR_transposon	23.19672131147541,21.393442622950822,18.934426229508194,20.0,12.213114754098363,15.655737704918028,14.262295081967215,17.950819672131143,22.295081967213118,12.295081967213116,22.37704918032787,19.59016393442623,4.098360655737708,8.60655737704918,14.426229
COSVb	chr8	NonIntact	Mutator_TIR_transposon	11.967213114754099,18.278688524590162,13.278688524590166,18.0327868852459,20.081967213114755,20.081967213114755,20.81967213114754,15.655737704918028,15.655737704918028,12.786885245901642,18.0327868852459,20.245901639344265,20.245901639344265,19.8360655737
COSVb	chr8	NonIntact	Copia_LTR_retrotransposon	23.442622950819676,23.442622950819676,23.442622950819676,23.442622950819676,23.442622950819676,23.442622950819676,5.819672131147537,15.245901639344268,2.049180327868854,16.0655737704918,21.147540983606557,24.016393442622952,8.934426229508196,13.4426229508
COSVb	chr8	NonIntact	LTR_retrotransposon	12.131147540983608,10.081967213114753,15.49180327868852,9.426229508196721,14.836065573770496,3.6065573770491834,3.1967213114754123,12.131147540983608,10.081967213114753,15.49180327868852,9.426229508196721,14.836065573770496,3.6065573770491834,3.1967213114
COSVb	chr8	NonIntact	Gypsy_LTR_retrotransposon	10.901639344262296,10.901639344262296,10.901639344262296,10.901639344262296,10.901639344262296,19.42622950819672,17.62295081967213,22.049180327868854,11.80327868852459,9.01639344262295,12.868852459016395,15.819672131147538,17.04918032786885,14.91803278688
COSVb	chr8	NonIntact	Tc1_Mariner_TIR_transposon	19.754098360655735,19.42622950819672,19.508196721311474,18.524590163934423,18.934426229508194,18.196721311475407,18.934426229508194,18.934426229508194,21.885245901639347,21.885245901639347,19.42622950819672,19.42622950819672,19.344262295081965,18.77049180
COSVb	chr8	NonIntact	hAT_TIR_transposon	19.262295081967213,17.86885245901639,16.72131147540983,8.360655737704915,18.0327868852459,9.426229508196721,17.21311475409836,7.540983606557375,17.540983606557372,7.04918032786885,17.04918032786885,5.983606557377045,17.540983606557372,7.295081967213112,17
COSVb	chr8	NonIntact	CACTA_TIR_transposon	17.1311475409836,13.524590163934429,14.098360655737707,8.524590163934425,13.36065573770492,16.147540983606554,18.606557377049178,18.114754098360653,16.147540983606554,18.442622950819672,16.147540983606554,19.18032786885246,14.672131147540988,19.5901639344
COSVb	chr8	NonIntact	helitron	4.016393442622954,4.754098360655742,5.983606557377045,4.8360655737704965,4.9180327868852505,2.4590163934426252,4.9180327868852505,7.295081967213112,11.80327868852459,11.557377049180328,12.95081967213115,8.114754098360654,8.770491803278686,4.01639344262295
COSVb	chr8	NonIntact	PIF_Harbinger_TIR_transposon	24.426229508196727,7.295081967213112,17.21311475409836,7.295081967213112,20.573770491803277,17.1311475409836,15.081967213114758,13.688524590163937,21.229508196721312,12.131147540983608,4.9180327868852505,8.688524590163933,11.967213114754099,15.245901639344268,14.098360655737707,19.508196721311474,9.672131147540982,9.508196721311474,4.344262295081971,6.4754098360655705,15.819672131147538,8.1967213…
COSVb	chr9	NonIntact	Mutator_TIR_transposon	15.983606557377046,5.245901639344258,18.770491803278688,18.0327868852459,6.967213114754096,23.934426229508198,23.77049180327869,13.442622950819676,7.704918032786884,22.622950819672134,13.36065573770492,13.442622950819676,13.442622950819676,10.327868852459
COSVb	chr9	NonIntact	hAT_TIR_transposon	16.63934426229508,16.63934426229508,14.016393442622954,8.114754098360654,16.147540983606554,16.72131147540983,10.40983606557377,16.885245901639344,11.311475409836067,17.04918032786885,14.91803278688525,12.049180327868855,11.80327868852459,8.27868852459016
COSVb	chr9	NonIntact	helitron	7.04918032786885,10.573770491803279,20.163934426229506,3.852459016393446,3.9344262295082,5.1639344262295035,5.655737704918029,15.49180327868852,14.426229508196725,13.606557377049183,5.49180327868852,15.409836065573767,16.22950819672131,16.393442622950815,
COSVb	chr9	NonIntact	Copia_LTR_retrotransposon	11.229508196721312,8.524590163934425,9.918032786885245,18.114754098360653,12.37704918032787,20.0,19.83606557377049,23.27868852459017,10.655737704918032,7.459016393442621,8.0327868852459,8.360655737704915,10.081967213114753,10.081967213114753,8.52459016393
COSVb	chr9	NonIntact	LTR_retrotransposon	8.360655737704915,12.868852459016395,15.327868852459021,23.524590163934427,16.47540983606557,16.147540983606554,8.688524590163933,12.295081967213116,4.426229508196726,10.98360655737705,5.1639344262295035,5.901639344262291,3.4426229508196755,4.836065573770
COSVb	chr9	NonIntact	Gypsy_LTR_retrotransposon	10.0,17.21311475409836,9.344262295081966,11.557377049180328,10.081967213114753,4.8360655737704965,8.688524590163933,19.672131147540984,21.721311475409834,15.081967213114758,8.60655737704918,19.672131147540984,11.557377049180328,12.37704918032787,11.557377
COSVb	chr9	NonIntact	CACTA_TIR_transposon	11.721311475409838,14.590163934426233,17.62295081967213,15.983606557377046,15.081967213114758,7.213114754098358,15.983606557377046,16.72131147540983,19.01639344262295,14.754098360655743,18.606557377049178,16.47540983606557,10.573770491803279,15.9016393442
COSVb	chr9	NonIntact	Tc1_Mariner_TIR_transposon	16.31147540983606,20.0,19.262295081967213,18.606557377049178,16.47540983606557,19.262295081967213,18.606557377049178,19.262295081967213,17.62295081967213,17.62295081967213,20.81967213114754,20.491803278688526,21.475409836065577,21.229508196721312,18.93442
COSVb	chr9	NonIntact	PIF_Harbinger_TIR_transposon	17.45901639344262,15.655737704918028,14.754098360655743,18.606557377049178,8.360655737704915,12.049180327868855,15.081967213114758,16.47540983606557,21.311475409836063,20.327868852459016,20.983606557377048,14.50819672131148,10.163934426229508,14.754098360655743,12.459016393442624,21.311475409836063,21.065573770491806,17.704918032786882,4.098360655737708,15.409836065573767,4.016393442622954,11.803…
COSVb	chrX	NonIntact	Mutator_TIR_transposon	15.327868852459021,16.72131147540983,15.163934426229511,13.442622950819676,11.229508196721312,18.196721311475407,15.819672131147538,15.49180327868852,13.934426229508201,5.573770491803274,8.770491803278686,22.622950819672134,7.213114754098358,16.9672131147
COSVb	chrX	NonIntact	hAT_TIR_transposon	17.1311475409836,14.91803278688525,18.442622950819672,14.426229508196725,16.47540983606557,9.754098360655737,17.45901639344262,17.377049180327866,13.606557377049183,16.47540983606557,21.229508196721312,12.295081967213116,13.196721311475413,16.065573770491
COSVb	chrX	NonIntact	helitron	11.147540983606559,21.9672131147541,5.655737704918029,12.622950819672134,14.016393442622954,21.639344262295083,17.540983606557372,17.21311475409836,12.704918032786887,18.524590163934423,21.229508196721312,17.62295081967213,20.491803278688526,18.0327868852
COSVb	chrX	NonIntact	CACTA_TIR_transposon	21.557377049180328,12.459016393442624,9.426229508196721,16.557377049180324,9.262295081967212,14.426229508196725,17.540983606557372,15.245901639344268,13.114754098360658,14.180327868852462,20.901639344262293,20.573770491803277,16.147540983606554,10.3278688
COSVb	chrX	NonIntact	Copia_LTR_retrotransposon	17.04918032786885,3.852459016393446,15.901639344262291,9.098360655737704,17.21311475409836,17.62295081967213,5.655737704918029,7.213114754098358,18.442622950819672,11.311475409836067,13.606557377049183,15.245901639344268,8.688524590163933,10.4098360655737
COSVb	chrX	NonIntact	Tc1_Mariner_TIR_transposon	18.278688524590162,17.29508196721311,22.868852459016395,18.934426229508194,11.229508196721312,16.393442622950815,12.704918032786887,16.967213114754095,16.47540983606557,15.983606557377046,17.377049180327866,23.60655737704918,4.098360655737708,18.524590163
COSVb	chrX	NonIntact	LTR_retrotransposon	15.081967213114758,5.737704918032783,6.5573770491803245,13.196721311475413,6.4754098360655705,4.426229508196726,13.852459016393446,7.377049180327866,8.114754098360654,13.688524590163937,2.8688524590163964,0.7377049180327875,15.409836065573767,4.7540983606
COSVb	chrX	NonIntact	Gypsy_LTR_retrotransposon	14.344262295081972,6.311475409836063,10.819672131147541,18.0327868852459,10.163934426229508,20.163934426229506,17.04918032786885,3.688524590163938,1.2295081967213126,2.622950819672133,0.8196721311475417,22.622950819672134,16.393442622950815,11.22950819672
COSVb	chrX	NonIntact	PIF_Harbinger_TIR_transposon	20.163934426229506,15.327868852459021,17.04918032786885,16.557377049180324,6.5573770491803245,3.4426229508196755,9.836065573770492,21.393442622950822,10.40983606557377,20.983606557377048,15.737704918032781,21.393442622950822,20.491803278688526,12.29508196
DPFBa	chr1	NonIntact	PIF_Harbinger_TIR_transposon	20.40983606557377,20.081967213114755,19.262295081967213,19.18032786885246,20.0,18.934426229508194,19.754098360655735,19.42622950819672,20.491803278688526,20.573770491803277,20.40983606557377,20.491803278688526,20.163934426229506,19.754098360655735,20.573770491803277,20.081967213114755,20.491803278688526,20.081967213114755,20.081967213114755,20.081967213114755,20.081967213114755,20.081967213114755…
DPFBa	chr1	NonIntact	LTR_retrotransposon	16.72131147540983,13.934426229508201,11.229508196721312,15.081967213114758,5.737704918032783,12.704918032786887,4.8360655737704965,8.934426229508196,21.311475409836063,19.344262295081965,5.983606557377045,10.245901639344263,5.983606557377045,5.90163934426
DPFBa	chr1	NonIntact	helitron	18.360655737704917,9.918032786885245,9.59016393442623,16.0655737704918,9.426229508196721,17.86885245901639,20.327868852459016,13.770491803278691,17.540983606557372,8.0327868852459,23.524590163934427,16.147540983606554,9.918032786885245,9.098360655737704,1
DPFBa	chr1	NonIntact	Copia_LTR_retrotransposon	16.885245901639344,5.49180327868852,13.606557377049183,6.147540983606554,2.1311475409836085,9.344262295081966,20.327868852459016,13.770491803278691,10.573770491803279,18.688524590163933,24.180327868852462,14.426229508196725,14.180327868852462,11.147540983
DPFBa	chr1	NonIntact	hAT_TIR_transposon	22.78688524590164,14.426229508196725,10.819672131147541,9.59016393442623,16.0655737704918,17.21311475409836,14.91803278688525,24.50819672131148,15.901639344262291,13.36065573770492,20.327868852459016,16.967213114754095,6.393442622950817,5.819672131147537,
DPFBa	chr1	NonIntact	Mutator_TIR_transposon	16.47540983606557,24.180327868852462,12.459016393442624,19.01639344262295,15.163934426229511,15.163934426229511,14.836065573770496,18.524590163934423,8.770491803278686,9.59016393442623,15.327868852459021,8.196721311475407,18.852459016393443,15.65573770491
DPFBa	chr1	NonIntact	Gypsy_LTR_retrotransposon	10.327868852459018,5.327868852459011,2.786885245901642,3.0327868852459043,5.655737704918029,5.1639344262295035,6.885245901639341,6.065573770491799,6.229508196721308,1.0655737704918042,20.737704918032787,9.01639344262295,7.295081967213112,5.655737704918029
DPFBa	chr1	NonIntact	CACTA_TIR_transposon	20.737704918032787,21.393442622950822,16.0655737704918,6.229508196721308,9.01639344262295,11.39344262295082,14.344262295081972,8.196721311475407,17.86885245901639,8.688524590163933,19.59016393442623,8.0327868852459,12.868852459016395,12.54098360655738,23.
DPFBa	chr1	NonIntact	Tc1_Mariner_TIR_transposon	11.885245901639346,11.311475409836067,13.114754098360658,20.163934426229506,20.81967213114754,23.852459016393446,20.573770491803277,11.311475409836067,10.245901639344263,17.1311475409836,19.01639344262295,19.01639344262295,19.59016393442623,14.262295081967215,14.91803278688525,18.606557377049178,12.131147540983608,13.770491803278691,21.475409836065577,23.442622950819676,22.459016393442624,18.1147…
DPFBa	chr2	NonIntact	Mutator_TIR_transposon	2.622950819672133,5.655737704918029,9.262295081967212,12.37704918032787,22.459016393442624,22.459016393442624,17.540983606557372,14.91803278688525,12.131147540983608,8.852459016393441,10.819672131147541,9.918032786885245,20.983606557377048,15.081967213114
DPFBa	chr2	NonIntact	Copia_LTR_retrotransposon	13.196721311475413,10.573770491803279,7.704918032786884,22.459016393442624,18.524590163934423,23.68852459016394,1.393442622950821,15.573770491803273,19.01639344262295,15.163934426229511,12.868852459016395,6.5573770491803245,13.442622950819676,15.081967213
DPFBa	chr2	NonIntact	Gypsy_LTR_retrotransposon	16.0655737704918,17.62295081967213,2.5409836065573796,6.6393442622950785,22.295081967213118,11.885245901639346,12.049180327868855,14.836065573770496,16.72131147540983,13.606557377049183,9.098360655737704,16.0655737704918,13.688524590163937,9.0983606557377
DPFBa	chr2	NonIntact	hAT_TIR_transposon	13.196721311475413,14.91803278688525,11.639344262295085,11.885245901639346,16.72131147540983,17.21311475409836,6.4754098360655705,14.590163934426233,14.426229508196725,16.803278688524586,15.245901639344268,9.508196721311474,6.885245901639341,7.78688524590
DPFBa	chr2	NonIntact	helitron	17.377049180327866,5.409836065573766,15.655737704918028,20.573770491803277,18.278688524590162,13.196721311475413,18.114754098360653,17.45901639344262,2.5409836065573796,17.21311475409836,14.672131147540988,18.360655737704917,5.000000000000004,8.4426229508
DPFBa	chr2	NonIntact	LTR_retrotransposon	15.081967213114758,13.442622950819676,18.278688524590162,14.426229508196725,18.114754098360653,15.573770491803273,15.163934426229511,16.63934426229508,3.7704918032786923,19.18032786885246,7.04918032786885,12.213114754098363,10.327868852459018,8.6885245901
DPFBa	chr2	NonIntact	CACTA_TIR_transposon	16.967213114754095,20.163934426229506,16.967213114754095,20.245901639344265,20.737704918032787,10.40983606557377,17.62295081967213,15.245901639344268,11.311475409836067,14.344262295081972,16.0655737704918,5.1639344262295035,11.065573770491802,17.459016393
DPFBa	chr2	NonIntact	Tc1_Mariner_TIR_transposon	18.770491803278688,21.9672131147541,22.37704918032787,10.491803278688524,16.72131147540983,18.524590163934423,14.344262295081972,17.377049180327866,14.50819672131148,15.573770491803273,23.114754098360656,21.639344262295083,16.803278688524586,22.54098360655738,20.327868852459016,10.081967213114753,13.36065573770492,14.180327868852462,20.245901639344265,18.688524590163933,9.754098360655737,17.86885…
DPFBa	chr2	NonIntact	PIF_Harbinger_TIR_transposon	13.524590163934429,17.540983606557372,18.606557377049178,21.9672131147541,19.18032786885246,16.72131147540983,12.213114754098363,16.885245901639344,14.180327868852462,7.459016393442621,10.737704918032788,13.442622950819676,17.29508196721311,20.98360655737
DPFBa	chr3	NonIntact	Mutator_TIR_transposon	2.049180327868854,2.5409836065573796,17.86885245901639,7.540983606557375,17.45901639344262,15.081967213114758,21.557377049180328,19.83606557377049,14.672131147540988,21.229508196721312,13.852459016393446,15.081967213114758,13.852459016393446,18.6065573770
DPFBa	chr3	NonIntact	Gypsy_LTR_retrotransposon	9.59016393442623,2.622950819672133,10.163934426229508,0.0,14.754098360655743,20.655737704918035,19.83606557377049,17.62295081967213,7.04918032786885,4.016393442622954,4.344262295081971,7.04918032786885,22.295081967213118,21.229508196721312,17.868852459016
DPFBa	chr3	NonIntact	hAT_TIR_transposon	12.213114754098363,13.196721311475413,11.39344262295082,16.393442622950815,13.032786885245905,7.295081967213112,11.721311475409838,14.754098360655743,15.901639344262291,16.557377049180324,23.524590163934427,20.0,18.360655737704917,16.0655737704918,21.5573
DPFBa	chr3	NonIntact	LTR_retrotransposon	17.540983606557372,15.081967213114758,20.327868852459016,15.081967213114758,17.04918032786885,2.377049180327871,21.065573770491806,19.01639344262295,11.065573770491802,23.934426229508198,18.360655737704917,17.04918032786885,18.934426229508194,18.442622950
DPFBa	chr3	NonIntact	Copia_LTR_retrotransposon	17.786885245901637,16.885245901639344,19.262295081967213,16.31147540983606,20.40983606557377,14.098360655737707,10.819672131147541,8.360655737704915,10.491803278688524,7.377049180327866,19.83606557377049,14.50819672131148,17.45901639344262,18.114754098360
DPFBa	chr3	NonIntact	CACTA_TIR_transposon	3.524590163934429,14.590163934426233,5.327868852459011,4.754098360655742,16.147540983606554,14.344262295081972,13.032786885245905,13.524590163934429,8.60655737704918,9.344262295081966,6.4754098360655705,13.606557377049183,19.18032786885246,9.5901639344262
[truncated: 6,366 more rows]

## Sheet: Figure2b_nonintact_TE_times_kya
Column1	Column2	Column3	Column4	Column5
[truncated: 5,932 more rows]

## Sheet: Figure2c_intact_TE_times_mya
Column1	Column2	Column3	Column4	Column5
[truncated: 6,605 more rows]

[truncated: 45 more sheets: Figure2c_intact_TE_times_kya, Figure2d_Ty1SIRatios, Figure2e_Ty3SIRatios, Figure2f_Ty1SexChromSIRatios, Figure2g_Ty3SexChromSIRatios, Figure2h_1_AH3Mb_gene_densities, Figure2h_2_AH3Mb_TE_densities, Figure2h_3_AH3Mb_TE_times, Figure2h_4_AH3Mb_LTR_densities, Figure2h_5_AH3Mb_LTR_times, Figure2h_6_AH3Mb_methylation, Figure2h_7_AH3Mb_gc_content, Figure2h_8_AH3Mb_duplications, Figure2h_9_AH3Mb_inversions, Figure2h_10_AH3Mb_translocs, Figure2h_11_AH3Mb_chrom_lengths, Figure2h_12_AH3Mb_Ty1SIRatios, Figure2h_13_AH3Mb_Ty3SIRatios, Figure2h_14_cannabinoidSynthase, Figure2h_15_ALT_coords …]
