# Supplementary material for: Domesticated cannabinoid synthases amid a wild mosaic cannabis pangenome
Source: Nature. 2025 May 28;643(8073):1001–10. doi: 10.1038/s41586-025-09065-0 (PMC12286863; doi:10.1038/s41586-025-09065-0)
Supplement: Supplementary file 6 — Source Data Fig. 4 [file 41586_2025_9065_MOESM6_ESM.xlsx]

## Sheet: Figure4a_pathway_copy_numbers
Cannabis_sativa_AAE1_H9A1V3	ABAC.chr3	94.444	90	4	1	131	219	35626784	35627053	3.53e-98	175
Cannabis_sativa_AAE1_H9A1V3	ABAC.chr3	100	68	0	0	218	285	35627155	35627358	3.53e-98	136
Cannabis_sativa_AAE1_H9A1V3	ABAC.chr3	89.796	49	5	0	88	136	35626567	35626713	3.53e-98	92.8
Cannabis_sativa_AAE1_H9A1V3	ABAC.chr3	98.851	87	1	0	1	87	35623566	35623826	9.67e-47	184
Cannabis_sativa_AAE1_H9A1V3	ABAC.chr3	54.802	177	36	5	88	223	35597245	35597766	1.99e-42	171
Cannabis_sativa_AAE1_H9A1V3	ABAC.chr3	70.199	151	8	1	434	547	35631277	35631729	1.34e-41	168
Cannabis_sativa_AAE1_H9A1V3	ABAC.chr3	100	74	0	0	366	439	35630803	35631024	1.36e-37	156
Cannabis_sativa_AAE1_H9A1V3	ABAC.chr3	90.476	84	3	2	531	613	35632735	35632974	4.07e-37	154
Cannabis_sativa_AAE1_H9A1V3	ABAC.chr3	78.824	85	18	0	355	439	35600771	35601025	1.33e-33	143
Cannabis_sativa_AAE1_H9A1V3	ABAC.chr3	91.892	74	2	1	626	699	35633694	35633903	6.98e-31	135
Cannabis_sativa_AAE1_H9A1V3	ABAC.chr3	71.951	82	23	0	5	86	35596179	35596424	9.99e-31	134
Cannabis_sativa_AAE1_H9A1V3	ABAC.chr3	85.714	70	10	0	544	613	35602574	35602783	3.81e-30	132
Cannabis_sativa_AAE1_H9A1V3	ABAC.chr3	51.266	158	23	2	440	543	35601871	35602344	1.49e-28	127
Cannabis_sativa_AAE1_H9A1V3	ABAC.chr3	82.353	68	12	0	218	285	35598728	35598931	2.94e-23	110
Cannabis_sativa_AAE1_H9A1V3	ABAC.chr3	73.846	65	17	0	626	690	35606988	35607182	7.62e-22	106
Cannabis_sativa_AAE1_H9A1V3	ABAC.chr3	91.837	49	4	0	293	341	35629663	35629809	6.87e-18	93.6
Cannabis_sativa_AAE1_H9A1V3	ABAC.chr3	62.791	43	16	0	299	341	35599434	35599562	4.9e-10	62.8
Cannabis_sativa_AAE1_H9A1V3	ABAC.chr3	66.667	15	5	0	284	298	35599276	35599320	4.9e-10	24.6
Cannabis_sativa_AAE1_H9A1V3	ABAC.chr3	100	31	0	0	690	720	35634061	35634153	1.87e-09	65.9
Cannabis_sativa_AAE1_H9A1V3	ABAC.chr3	96.154	26	1	0	341	366	35630268	35630345	9.13e-07	57
Cannabis_sativa_AAE1_H9A1V3	ABAC.chr3	75	32	8	0	689	720	35607371	35607466	1.42e-06	56.6
Cannabis_sativa_AAE1_H9A1V3	ABAC.chr3	58.537	41	17	0	332	372	35600391	35600513	0.000262	48.9
Cannabis_sativa_AAE1_H9A1V3	ABAC.chr3	21.356	295	195	11	188	471	16541641	16542447	0.046	41.6
Cannabis_sativa_AAE1_H9A1V3	ABAC.chr9	55	80	35	1	219	298	28237773	28238009	8.27e-42	80.9
Cannabis_sativa_AAE1_H9A1V3	ABAC.chr9	47.727	88	42	4	131	216	28237429	28237686	8.27e-42	79.3
Cannabis_sativa_AAE1_H9A1V3	ABAC.chr9	63.415	41	15	0	91	131	28237224	28237346	8.27e-42	55.5
Cannabis_sativa_AAE1_H9A1V3	ABAC.chr9	50.962	104	49	1	357	458	28357117	28357428	3.32e-25	117
Cannabis_sativa_AAE1_H9A1V3	ABAC.chr9	44	125	41	1	344	439	28239367	28239741	1.25e-24	115
Cannabis_sativa_AAE1_H9A1V3	ABAC.chr9	33.778	225	73	2	438	586	28240717	28241391	1.3e-23	112
Cannabis_sativa_AAE1_H9A1V3	ABAC.chr9	42.424	99	51	3	132	228	28354847	28355131	5.67e-23	78.6
Cannabis_sativa_AAE1_H9A1V3	ABAC.chr9	51.064	47	23	0	91	137	28354608	28354748	5.67e-23	53.1
Cannabis_sativa_AAE1_H9A1V3	ABAC.chr9	51.562	64	29	1	627	690	28241807	28241992	1.03e-20	70.5
Cannabis_sativa_AAE1_H9A1V3	ABAC.chr9	59.375	32	13	0	582	613	28241595	28241690	1.03e-20	42.4
Cannabis_sativa_AAE1_H9A1V3	ABAC.chr9	48.276	29	15	0	689	717	28242103	28242189	1.03e-20	30.8
Cannabis_sativa_AAE1_H9A1V3	ABAC.chr9	67.143	70	22	1	219	288	28355325	28355531	5.99e-16	87
Cannabis_sativa_AAE1_H9A1V3	ABAC.chr9	46.316	95	47	1	451	545	28358071	28358343	2.38e-10	68.9
Cannabis_sativa_AAE1_H9A1V3	ABAC.chr9	47.887	71	34	2	626	696	28359103	28359306	3.79e-10	68.2
Cannabis_sativa_AAE1_H9A1V3	ABAC.chr9	43.137	51	27	1	423	471	28357889	28358041	0.000163	49.7
Cannabis_sativa_AAE1_H9A1V3	ABAC.chr9	48.837	43	22	0	544	586	28358507	28358635	0.000359	48.5
Cannabis_sativa_AAE1_H9A1V3	ABAC.chr9	47.059	51	23	1	299	345	28238749	28238901	0.002	45.8
Cannabis_sativa_AAE1_H9A1V3	ABAC.chr9	55.882	34	15	0	580	613	28358862	28358963	0.019	43.1
Cannabis_sativa_AAE1_H9A1V3	ABAC.chr9	55.556	36	16	0	299	334	28356360	28356467	0.023	42.7
Cannabis_sativa_AAE1_H9A1V3	ABAC.chr9	50	30	13	1	689	718	28359450	28359533	8.9	34.3
Cannabis_sativa_AAE1_H9A1V3	ABAC.072	26.866	201	139	4	110	304	1114	518	2.27e-10	68.9
Cannabis_sativa_AAE1_H9A1V3	ABAC.chr5	24.907	269	161	10	219	471	2740075	2739344	1.61e-06	56.2
Cannabis_sativa_AAE1_H9A1V3	ABAC.chr6	23.774	265	181	8	219	477	78092415	78093164	0.014	43.5
Cannabis_sativa_AAE1_H9A1V3	ABAC.chr6	30.597	134	79	6	353	477	78107612	78107998	0.16	40
Cannabis_sativa_AAE1_H9A1V3	ABAC.chr6	30.709	127	74	6	360	477	84532292	84531927	0.35	38.9
Cannabis_sativa_AAE1_H9A1V3	ABAC.chr8	36.538	52	32	1	165	216	5750560	5750408	0.22	32
Cannabis_sativa_AAE1_H9A1V3	ABAC.chr8	24.762	105	49	1	223	297	5750289	5749975	0.22	25
Cannabis_sativa_AAE1_H9A1V3	ABAC.chrX	21.154	208	145	5	247	453	80450305	80450874	2.4	36.2
Cannabis_sativa_AAE1_H9A1V3	ABAC.chrX	20.701	314	226	7	174	477	17033891	17032989	2.8	35.8
Cannabis_sativa_GPPS_large_subunit_A0A1V0QSH4	ABAC.chr4	100	393	0	0	1	393	6356778	6357956	0	778
Cannabis_sativa_GPPS_large_subunit_A0A1V0QSH4	ABAC.chrX	41.15	226	113	6	173	391	77788005	77788643	7.7e-37	146
Cannabis_sativa_GPPS_large_subunit_A0A1V0QSH4	ABAC.chrX	40.26	77	45	1	100	175	77787476	77787706	9.25e-12	71.2
Cannabis_sativa_GPPS_large_subunit_A0A1V0QSH4	ABAC.chr6	30.942	223	143	3	101	314	39737277	39736615	2.74e-21	100
Cannabis_sativa_GPPS_large_subunit_A0A1V0QSH4	ABAC.chr9	27.273	220	146	4	104	314	553995	554639	1.19e-16	86.7
Cannabis_sativa_GPPS_large_subunit_A0A1V0QSH4	ABAC.chr1	37.624	101	63	0	265	365	13768093	13768395	1.45e-10	67.8
Cannabis_sativa_GPPS_large_subunit_A0A1V0QSH4	ABAC.chr1	37.624	101	63	0	265	365	13025248	13025550	1.47e-10	67.8
Cannabis_sativa_GPPS_large_subunit_A0A1V0QSH4	ABAC.chr1	60.714	28	9	1	167	194	13024519	13024596	2.9	34.7
Cannabis_sativa_GPPS_large_subunit_A0A1V0QSH4	ABAC.chr1	60.714	28	9	1	167	194	13767359	13767436	2.9	34.7
Cannabis_sativa_GPPS_small_subunit_A0A1V0QSG9	ABAC.chr6	98.746	319	3	1	9	326	39737418	39736462	0	608
Cannabis_sativa_GPPS_small_subunit_A0A1V0QSG9	ABAC.chr9	55.709	289	110	6	44	324	553938	554774	5.04e-83	278
Cannabis_sativa_GPPS_small_subunit_A0A1V0QSG9	ABAC.chr4	31.364	220	140	3	58	275	6357087	6357719	9.21e-23	103
Cannabis_sativa_GPPS_small_subunit_A0A1V0QSG9	ABAC.chrX	26.606	218	128	4	127	323	77788005	77788625	1.19e-06	54.7
Cannabis_sativa_GPPS_small_subunit_A0A1V0QSG9	ABAC.chrX	29.592	98	59	3	36	129	77787431	77787706	0.001	45.4
Cannabis_sativa_OAC_I6WU39	ABAC.chr9	73.134	134	3	1	1	101	3756982	3756581	1.05e-54	186
Cannabis_sativa_OAC_I6WU39	ABAC.chr9	100	59	0	0	43	101	3752246	3752070	7.58e-48	124
Cannabis_sativa_OAC_I6WU39	ABAC.chr9	97.619	42	1	0	1	42	3752470	3752345	7.58e-48	85.9
Cannabis_sativa_OAC_I6WU39	ABAC.chr9	34.559	136	48	2	3	97	4609453	4609046	1.14e-17	80.1
Cannabis_sativa_OAC_I6WU39	ABAC.chr9	33.835	133	52	2	3	99	4614329	4613931	3.63e-16	75.9
Cannabis_sativa_OAC_I6WU39	ABAC.chr9	44.286	70	39	0	30	99	3730492	3730283	6.74e-14	69.7
Cannabis_sativa_OAC_I6WU39	ABAC.chr9	42.5	40	23	0	3	42	3730728	3730609	2.61e-05	45.1
Cannabis_sativa_OAC_I6WU39	ABAC.chr2	29.31	58	40	1	41	97	96022910	96022737	0.88	32.3
Cannabis_sativa_OAC_I6WU39	ABAC.chr2	29.31	58	40	1	41	97	97778459	97778632	0.88	32.3
Cannabis_sativa_OAC_I6WU39	ABAC.chr1	19.802	101	73	2	1	97	38944745	38944455	1.8	31.2
Cannabis_sativa_OAC_I6WU39	ABAC.chr8	25	52	39	0	30	81	11104724	11104569	6.4	29.6
Cannabis_sativa_OLS_B1Q2B6	ABAC.chr8	99.102	334	3	0	52	385	5599749	5600750	0	684
Cannabis_sativa_OLS_B1Q2B6	ABAC.chr8	95.072	345	17	0	41	385	5619723	5620757	0	681
Cannabis_sativa_OLS_B1Q2B6	ABAC.chr8	94.659	337	18	0	49	385	5625996	5627006	0	664
Cannabis_sativa_OLS_B1Q2B6	ABAC.chr8	80.12	332	64	1	54	383	5633645	5632650	0	564
Cannabis_sativa_OLS_B1Q2B6	ABAC.chr8	73.193	332	88	1	54	384	5578659	5577664	4.02e-156	490
Cannabis_sativa_OLS_B1Q2B6	ABAC.chr8	91.071	56	5	0	4	59	5599495	5599662	3.4e-24	108
Cannabis_sativa_OLS_B1Q2B6	ABAC.chr8	94.118	51	3	0	3	53	5625614	5625766	5.01e-24	108
Cannabis_sativa_OLS_B1Q2B6	ABAC.chr8	94	50	3	0	4	53	5619451	5619600	5.35e-23	105
Cannabis_sativa_OLS_B1Q2B6	ABAC.chr8	73.239	71	17	1	284	352	4837797	4838009	1.86e-22	102
Cannabis_sativa_OLS_B1Q2B6	ABAC.chr8	47.826	23	12	0	251	273	4837726	4837794	1.86e-22	25.8
Cannabis_sativa_OLS_B1Q2B6	ABAC.chr8	88	50	5	1	5	53	5634560	5634411	4.83e-20	96.7
Cannabis_sativa_OLS_B1Q2B6	ABAC.chr8	63.265	49	18	0	5	53	5580899	5580753	6.16e-14	78.2
Cannabis_sativa_OLS_B1Q2B6	ABAC.chr8	23.276	232	136	9	155	368	19489378	19488755	0.23	38.1
Cannabis_sativa_OLS_B1Q2B6	ABAC.chr3	94.493	345	19	0	41	385	52779188	52778154	0	671
Cannabis_sativa_OLS_B1Q2B6	ABAC.chr3	98.113	53	1	0	1	53	52779460	52779302	1.42e-26	116
Cannabis_sativa_OLS_B1Q2B6	ABAC.chrX	62.857	350	130	0	32	381	55733873	55732824	5.62e-151	476
Cannabis_sativa_OLS_B1Q2B6	ABAC.chrX	34.493	345	206	3	56	381	70967901	70966870	6.84e-64	225
Cannabis_sativa_OLS_B1Q2B6	ABAC.chrX	65.306	49	17	0	5	53	55737654	55737508	3.03e-14	79
Cannabis_sativa_OLS_B1Q2B6	ABAC.chrX	21.633	245	152	10	155	368	2686477	2685770	0.000775	46.2
Cannabis_sativa_OLS_B1Q2B6	ABAC.chrX	23.887	247	144	10	155	368	619095	619802	0.004	43.9
Cannabis_sativa_OLS_B1Q2B6	ABAC.chrX	30.588	85	52	3	297	381	65434067	65434300	1	36.2
Cannabis_sativa_OLS_B1Q2B6	ABAC.chrX	27.193	114	76	5	194	305	58790876	58790550	1.1	36.2
Cannabis_sativa_OLS_B1Q2B6	ABAC.chr9	68.06	335	106	1	49	383	1987184	1986183	4.5e-149	470
Cannabis_sativa_OLS_B1Q2B6	ABAC.chr9	70.979	286	82	1	98	383	12749785	12750639	4.64e-135	430
Cannabis_sativa_OLS_B1Q2B6	ABAC.chr9	65.306	49	17	0	5	53	12749408	12749554	1.61e-24	80.1
Cannabis_sativa_OLS_B1Q2B6	ABAC.chr9	50	58	29	0	54	111	12749652	12749825	1.61e-24	55.8
Cannabis_sativa_OLS_B1Q2B6	ABAC.chr9	61.667	60	20	1	5	61	1987822	1987643	1.71e-16	85.9
Cannabis_sativa_OLS_B1Q2B6	ABAC.chr9	34.722	72	42	2	297	368	13361027	13360827	0.074	39.7
Cannabis_sativa_OLS_B1Q2B6	ABAC.chr1	56.757	333	139	3	54	383	62684735	62683743	3.32e-118	381
Cannabis_sativa_OLS_B1Q2B6	ABAC.chr1	47.727	44	23	0	10	53	62685130	62684999	0.000128	48.5
Cannabis_sativa_OLS_B1Q2B6	ABAC.chr1	23.077	247	146	9	155	368	18509688	18508981	0.017	42
Cannabis_sativa_OLS_B1Q2B6	ABAC.chr1	21.012	257	163	8	143	368	32362832	32363575	0.032	40.8
Cannabis_sativa_OLS_B1Q2B6	ABAC.chr1	26.606	109	74	3	258	360	65731157	65731483	1.4	35.8
Cannabis_sativa_OLS_B1Q2B6	ABAC.chr5	40.798	326	185	3	56	381	28661054	28662007	1.2e-72	250
Cannabis_sativa_OLS_B1Q2B6	ABAC.chr7	66.327	98	33	0	202	299	13991374	13991081	2.15e-38	151
Cannabis_sativa_OLS_B1Q2B6	ABAC.chr6	19.549	266	169	8	141	368	17952650	17951874	0.004	43.9
Cannabis_sativa_OLS_B1Q2B6	ABAC.chr6	33.333	72	43	2	297	368	17901543	17901343	0.021	41.6
Cannabis_sativa_OLS_B1Q2B6	ABAC.chr6	33.333	72	43	2	297	368	43334866	43335066	0.085	39.7
Cannabis_sativa_OLS_B1Q2B6	ABAC.chr2	21.318	258	165	11	141	368	28067128	28066379	0.004	43.9
Cannabis_sativa_OLS_B1Q2B6	ABAC.chr2	21.839	261	162	11	141	368	27733627	27732872	0.007	43.1
Cannabis_sativa_OLS_B1Q2B6	ABAC.chr2	59.259	27	11	0	146	172	80629011	80628931	3.5	34.3
Cannabis_sativa_OLS_B1Q2B6	ABAC.chr2	30.435	69	43	2	297	360	3659124	3658918	5	33.9
Cannabis_sativa_OLS_B1Q2B6	ABAC.chr2	26.316	114	77	5	194	305	79375341	79375667	9.3	33.1
Cannabis_sativa_OLS_B1Q2B6	ABAC.chr4	31.944	72	44	2	297	368	78799210	78799410	0.014	42
Cannabis_sativa_PT4_A0A455ZJC3	ABAC.chrX	80.128	156	3	1	121	248	55296556	55297023	2.51e-63	211
Cannabis_sativa_PT4_A0A455ZJC3	ABAC.chrX	78.125	32	7	0	241	272	55297115	55297210	2.51e-63	55.1
Cannabis_sativa_PT4_A0A455ZJC3	ABAC.chrX	93.671	79	5	0	1	79	55289366	55289602	3.38e-40	156
Cannabis_sativa_PT4_A0A455ZJC3	ABAC.chrX	46.857	175	34	4	1	122	55362203	55361697	1.02e-32	134
Cannabis_sativa_PT4_A0A455ZJC3	ABAC.chrX	71.014	69	20	0	175	243	55358573	55358367	1.61e-30	90.1
Cannabis_sativa_PT4_A0A455ZJC3	ABAC.chrX	62.745	51	19	0	124	174	55358809	55358657	1.61e-30	66.2
Cannabis_sativa_PT4_A0A455ZJC3	ABAC.chrX	81.667	60	10	1	1	60	55353653	55353477	1.05e-21	102
Cannabis_sativa_PT4_A0A455ZJC3	ABAC.chrX	97.826	46	1	0	77	122	55289939	55290076	2.81e-21	100
Cannabis_sativa_PT4_A0A455ZJC3	ABAC.chrX	69.231	78	24	0	168	245	55349286	55349053	2.44e-18	91.7
Cannabis_sativa_PT4_A0A455ZJC3	ABAC.chrX	88.889	27	3	0	372	398	55305486	55305566	2.61e-17	52.4
Cannabis_sativa_PT4_A0A455ZJC3	ABAC.chrX	72.222	36	9	1	329	364	55305130	55305234	2.61e-17	49.3
Cannabis_sativa_PT4_A0A455ZJC3	ABAC.chrX	83.333	18	1	1	359	374	55305350	55305403	2.61e-17	29.3
Cannabis_sativa_PT4_A0A455ZJC3	ABAC.chrX	97.561	41	1	0	303	343	55304378	55304500	6.5e-15	81.3
Cannabis_sativa_PT4_A0A455ZJC3	ABAC.chrX	53.659	41	19	0	303	343	55340322	55340200	6.99e-15	53.5
Cannabis_sativa_PT4_A0A455ZJC3	ABAC.chrX	50	40	20	0	265	304	55340528	55340409	6.99e-15	49.7
Cannabis_sativa_PT4_A0A455ZJC3	ABAC.chrX	47.778	90	43	1	172	257	55208953	55209222	5.54e-12	72
Cannabis_sativa_PT4_A0A455ZJC3	ABAC.chrX	97.059	34	1	0	271	304	55304091	55304192	1.27e-11	70.9
Cannabis_sativa_PT4_A0A455ZJC3	ABAC.chrX	52.703	74	34	1	172	244	64065245	64065466	1.78e-11	69.7
Cannabis_sativa_PT4_A0A455ZJC3	ABAC.chrX	38.462	26	16	0	247	272	64065562	64065639	1.78e-11	21.9
Cannabis_sativa_PT4_A0A455ZJC3	ABAC.chrX	36.842	133	52	3	172	272	63960999	63961397	1.09e-10	68.2
Cannabis_sativa_PT4_A0A455ZJC3	ABAC.chrX	45.349	86	46	1	173	257	64115833	64116090	1.18e-09	64.7
Cannabis_sativa_PT4_A0A455ZJC3	ABAC.chrX	57.143	49	21	0	124	172	55349843	55349697	2.38e-08	60.8
Cannabis_sativa_PT4_A0A455ZJC3	ABAC.chrX	30.476	105	40	1	273	344	64066519	64066833	9.02e-08	58.9
Cannabis_sativa_PT4_A0A455ZJC3	ABAC.chrX	42.857	42	24	0	303	344	63962158	63962283	1.13e-07	44.7
Cannabis_sativa_PT4_A0A455ZJC3	ABAC.chrX	40.625	32	19	0	272	303	63961964	63962059	1.13e-07	33.9
Cannabis_sativa_PT4_A0A455ZJC3	ABAC.chrX	54.762	42	19	0	303	344	55356660	55356535	1.36e-06	55.1
Cannabis_sativa_PT4_A0A455ZJC3	ABAC.chrX	51.111	45	20	1	78	122	55353245	55353117	5.25e-05	50.1
Cannabis_sativa_PT4_A0A455ZJC3	ABAC.chrX	33.824	68	33	1	278	345	55209701	55209868	0.000366	47.4
Cannabis_sativa_PT4_A0A455ZJC3	ABAC.chrX	30.252	119	47	3	90	172	55207627	55207983	0.00042	47
Cannabis_sativa_PT4_A0A455ZJC3	ABAC.chrX	48.78	41	21	0	264	304	55356914	55356792	0.001	45.8
Cannabis_sativa_PT4_A0A455ZJC3	ABAC.chrX	40.816	49	29	0	124	172	64064228	64064374	0.1	39.3
Cannabis_sativa_PT4_A0A455ZJC3	ABAC.chrX	40.385	52	31	0	121	172	64112269	64112424	0.15	38.9
Cannabis_sativa_PT4_A0A455ZJC3	ABAC.chrX	64	25	9	0	374	398	55355901	55355827	0.17	38.9
Cannabis_sativa_PT4_A0A455ZJC3	ABAC.chrX	61.29	31	12	0	342	372	55339462	55339370	0.18	38.5
Cannabis_sativa_PT4_A0A455ZJC3	ABAC.chrX	54.545	33	14	1	119	150	63959878	63959976	0.25	32
Cannabis_sativa_PT4_A0A455ZJC3	ABAC.chrX	81.818	11	2	0	162	172	63960014	63960046	0.25	23.5
Cannabis_sativa_PT4_A0A455ZJC3	ABAC.chrX	64	25	9	0	374	398	55339133	55339059	0.49	37.4
Cannabis_sativa_PT4_A0A455ZJC3	ABAC.chrX	56.757	37	16	0	331	367	55356290	55356180	0.51	37.4
Cannabis_sativa_PT4_A0A455ZJC3	ABAC.chrX	48.387	31	16	0	273	303	55209540	55209632	0.73	36.6
Cannabis_sativa_PT4_A0A455ZJC3	ABAC.chr8	31.915	141	61	2	166	272	31959179	31958760	1.76e-07	57.8
Cannabis_sativa_PT4_A0A455ZJC3	ABAC.chr8	39.583	48	29	0	125	172	31959792	31959649	0.011	42.4
Cannabis_sativa_PT4_A0A455ZJC3	ABAC.chr8	46.667	30	16	0	274	303	31958437	31958348	6.2	33.5
Cannabis_sativa_PT4_A0A455ZJC3	ABAC.chr6	31.746	63	42	1	112	173	82760177	82760365	0.076	39.7
Cannabis_sativa_PT4_A0A455ZJC3	ABAC.chr6	31.746	63	42	1	112	173	83600285	83600473	0.076	39.7
Cannabis_sativa_PT4_A0A455ZJC3	ABAC.chr6	29.474	95	37	2	125	190	82749760	82750041	1.9	35.4
Cannabis_sativa_AAE1_H9A1V3	AH3Ma.chr3	97.753	89	2	0	131	219	35184059	35184325	3.72e-102	186
Cannabis_sativa_AAE1_H9A1V3	AH3Ma.chr3	97.183	71	2	0	218	288	35184426	35184638	3.72e-102	138
Cannabis_sativa_AAE1_H9A1V3	AH3Ma.chr3	91.837	49	4	0	88	136	35183842	35183988	3.72e-102	94
Cannabis_sativa_AAE1_H9A1V3	AH3Ma.chr3	80.124	161	3	2	88	219	35102953	35103435	4.69e-100	252
Cannabis_sativa_AAE1_H9A1V3	AH3Ma.chr3	97.143	70	2	0	218	287	35103536	35103745	4.69e-100	137
Cannabis_sativa_AAE1_H9A1V3	AH3Ma.chr3	70.918	196	3	3	472	613	35189109	35189696	2.66e-72	228
Cannabis_sativa_AAE1_H9A1V3	AH3Ma.chr3	81.395	43	8	0	429	471	35188864	35188992	2.66e-72	69.3
Cannabis_sativa_AAE1_H9A1V3	AH3Ma.chr3	100	87	0	0	1	87	35181038	35181298	1.97e-47	186
Cannabis_sativa_AAE1_H9A1V3	AH3Ma.chr3	96.552	87	3	0	1	87	35099346	35099606	8.34e-46	181
Cannabis_sativa_AAE1_H9A1V3	AH3Ma.chr3	54.237	177	37	5	88	223	35084268	35084789	8.92e-42	169
Cannabis_sativa_AAE1_H9A1V3	AH3Ma.chr3	92.405	79	6	0	469	547	35108704	35108940	9.29e-41	122
Cannabis_sativa_AAE1_H9A1V3	AH3Ma.chr3	89.474	38	4	0	434	471	35108483	35108596	9.29e-41	69.3
Cannabis_sativa_AAE1_H9A1V3	AH3Ma.chr3	100	74	0	0	366	439	35188415	35188636	1.33e-37	156
Cannabis_sativa_AAE1_H9A1V3	AH3Ma.chr3	90.476	84	3	2	531	613	35109063	35109302	3.96e-37	154
Cannabis_sativa_AAE1_H9A1V3	AH3Ma.chr3	98.649	74	1	0	366	439	35108009	35108230	5.7e-37	154
Cannabis_sativa_AAE1_H9A1V3	AH3Ma.chr3	78.824	85	18	0	355	439	35087787	35088041	1.3e-33	143
Cannabis_sativa_AAE1_H9A1V3	AH3Ma.chr3	93.243	74	1	1	626	699	35110021	35110230	1.89e-31	136
Cannabis_sativa_AAE1_H9A1V3	AH3Ma.chr3	93.243	74	1	1	626	699	35190418	35190627	1.89e-31	136
Cannabis_sativa_AAE1_H9A1V3	AH3Ma.chr3	73.171	82	22	0	5	86	35083179	35083424	6.11e-31	135
Cannabis_sativa_AAE1_H9A1V3	AH3Ma.chr3	85.714	70	10	0	544	613	35089612	35089821	3.7e-30	132
Cannabis_sativa_AAE1_H9A1V3	AH3Ma.chr3	82.353	68	12	0	218	285	35085750	35085953	2.85e-23	110
Cannabis_sativa_AAE1_H9A1V3	AH3Ma.chr3	73.846	65	17	0	626	690	35093983	35094177	6.8e-22	106
Cannabis_sativa_AAE1_H9A1V3	AH3Ma.chr3	73.846	65	17	0	626	690	35140189	35140383	2.98e-21	104
Cannabis_sativa_AAE1_H9A1V3	AH3Ma.chr3	70.667	75	22	0	469	543	35089158	35089382	1.69e-18	95.5
Cannabis_sativa_AAE1_H9A1V3	AH3Ma.chr3	91.837	49	4	0	293	341	35106840	35106986	6.68e-18	93.6
Cannabis_sativa_AAE1_H9A1V3	AH3Ma.chr3	91.837	49	4	0	293	341	35187264	35187410	6.68e-18	93.6
Cannabis_sativa_AAE1_H9A1V3	AH3Ma.chr3	90.625	32	3	0	440	471	35088908	35089003	1.38e-09	66.2
Cannabis_sativa_AAE1_H9A1V3	AH3Ma.chr3	100	31	0	0	690	720	35110387	35110479	1.82e-09	65.9
Cannabis_sativa_AAE1_H9A1V3	AH3Ma.chr3	100	31	0	0	690	720	35190786	35190878	1.82e-09	65.9
Cannabis_sativa_AAE1_H9A1V3	AH3Ma.chr3	60.465	43	17	0	299	341	35086455	35086583	2.13e-09	60.1
Cannabis_sativa_AAE1_H9A1V3	AH3Ma.chr3	66.667	15	5	0	284	298	35086297	35086341	2.13e-09	25.4
Cannabis_sativa_AAE1_H9A1V3	AH3Ma.chr3	96.154	26	1	0	341	366	35107472	35107549	8.88e-07	57
Cannabis_sativa_AAE1_H9A1V3	AH3Ma.chr3	96.154	26	1	0	341	366	35187882	35187959	8.88e-07	57
Cannabis_sativa_AAE1_H9A1V3	AH3Ma.chr3	75	32	8	0	689	720	35094366	35094461	1.38e-06	56.6
Cannabis_sativa_AAE1_H9A1V3	AH3Ma.chr3	75	32	8	0	689	720	35140559	35140654	1.38e-06	56.6
Cannabis_sativa_AAE1_H9A1V3	AH3Ma.chr3	43.548	62	34	1	332	393	35087407	35087589	3.97e-05	51.6
Cannabis_sativa_AAE1_H9A1V3	AH3Ma.chr3	21.695	295	194	11	188	471	64945512	64944706	0.015	43.1
Cannabis_sativa_AAE1_H9A1V3	AH3Ma.chr3	93.333	15	1	0	285	299	35187053	35187097	8.5	34.3
Cannabis_sativa_AAE1_H9A1V3	AH3Ma.chr9	61.429	70	26	1	219	288	38001787	38001581	5.79e-42	81.3
Cannabis_sativa_AAE1_H9A1V3	AH3Ma.chr9	47.727	88	42	4	131	216	38002131	38001874	5.79e-42	79.3
Cannabis_sativa_AAE1_H9A1V3	AH3Ma.chr9	63.415	41	15	0	91	131	38002336	38002214	5.79e-42	55.5
Cannabis_sativa_AAE1_H9A1V3	AH3Ma.chr9	50.962	104	49	1	357	458	37846489	37846178	3.23e-25	117
Cannabis_sativa_AAE1_H9A1V3	AH3Ma.chr9	44	125	41	1	344	439	38000193	37999819	2.08e-24	114
Cannabis_sativa_AAE1_H9A1V3	AH3Ma.chr9	42.424	99	51	3	132	228	37848755	37848471	5.51e-23	78.6
Cannabis_sativa_AAE1_H9A1V3	AH3Ma.chr9	51.064	47	23	0	91	137	37848994	37848854	5.51e-23	53.1
Cannabis_sativa_AAE1_H9A1V3	AH3Ma.chr9	52.308	65	29	1	626	690	37997697	37997509	4.87e-21	72.8
Cannabis_sativa_AAE1_H9A1V3	AH3Ma.chr9	59.375	32	13	0	582	613	37997905	37997810	4.87e-21	42.4
Cannabis_sativa_AAE1_H9A1V3	AH3Ma.chr9	44.828	29	16	0	689	717	37997398	37997312	4.87e-21	29.6
Cannabis_sativa_AAE1_H9A1V3	AH3Ma.chr9	40.146	137	54	1	437	545	37998787	37998377	2.55e-17	91.7
Cannabis_sativa_AAE1_H9A1V3	AH3Ma.chr9	68.657	67	20	1	219	285	37848277	37848080	1.1e-15	86.3
Cannabis_sativa_AAE1_H9A1V3	AH3Ma.chr9	46.316	95	47	1	451	545	37845535	37845263	2.31e-10	68.9
Cannabis_sativa_AAE1_H9A1V3	AH3Ma.chr9	47.887	71	34	2	626	696	37844501	37844298	3.69e-10	68.2
Cannabis_sativa_AAE1_H9A1V3	AH3Ma.chr9	43.137	51	27	1	423	471	37845717	37845565	0.000159	49.7
Cannabis_sativa_AAE1_H9A1V3	AH3Ma.chr9	48.837	43	22	0	544	586	37845097	37844969	0.000349	48.5
Cannabis_sativa_AAE1_H9A1V3	AH3Ma.chr9	48.837	43	22	0	544	586	37998237	37998109	0.002	46.6
Cannabis_sativa_AAE1_H9A1V3	AH3Ma.chr9	47.059	51	23	1	299	345	38000811	38000659	0.002	45.8
Cannabis_sativa_AAE1_H9A1V3	AH3Ma.chr9	55.882	34	15	0	580	613	37844742	37844641	0.018	43.1
Cannabis_sativa_AAE1_H9A1V3	AH3Ma.chr9	55.556	36	16	0	299	334	37847242	37847135	0.022	42.7
Cannabis_sativa_AAE1_H9A1V3	AH3Ma.chr9	50	30	13	1	689	718	37844154	37844071	6.4	34.7
Cannabis_sativa_AAE1_H9A1V3	AH3Ma.chr5	24.535	269	162	10	219	471	75045414	75046145	4.79e-06	54.7
Cannabis_sativa_AAE1_H9A1V3	AH3Ma.chr5	21.362	323	216	8	170	475	31270012	31269107	0.25	39.3
Cannabis_sativa_AAE1_H9A1V3	AH3Ma.chr8	22.989	261	177	7	223	477	36517566	36518294	5.38e-05	51.2
Cannabis_sativa_AAE1_H9A1V3	AH3Ma.chr8	36.538	52	32	1	165	216	5996902	5996750	0.21	32
Cannabis_sativa_AAE1_H9A1V3	AH3Ma.chr8	24.762	105	49	1	223	297	5996631	5996317	0.21	25
Cannabis_sativa_AAE1_H9A1V3	AH3Ma.chr6	23.774	265	181	8	219	477	3674594	3673845	0.014	43.5
Cannabis_sativa_AAE1_H9A1V3	AH3Ma.chr6	31.496	127	73	6	360	477	3662881	3662516	0.14	40
Cannabis_sativa_AAE1_H9A1V3	AH3Ma.chrX	20.701	314	226	7	174	477	17345150	17344248	2.8	35.8
Cannabis_sativa_AAE1_H9A1V3	AH3Ma.chrX	20.673	208	146	5	247	453	83447203	83446634	6.7	34.7
Cannabis_sativa_GPPS_large_subunit_A0A1V0QSH4	AH3Ma.chr4	99.237	393	3	0	1	393	75297697	75296519	0	766
Cannabis_sativa_GPPS_large_subunit_A0A1V0QSH4	AH3Ma.chrX	41.15	226	113	6	173	391	78420087	78420725	7.49e-37	146
Cannabis_sativa_GPPS_large_subunit_A0A1V0QSH4	AH3Ma.chrX	40.26	77	45	1	100	175	78419558	78419788	9e-12	71.2
Cannabis_sativa_GPPS_large_subunit_A0A1V0QSH4	AH3Ma.chr6	30.493	223	144	3	101	314	42926591	42927253	4.45e-21	100
Cannabis_sativa_GPPS_large_subunit_A0A1V0QSH4	AH3Ma.chr9	27.273	220	146	4	104	314	65397610	65396966	1.15e-16	86.7
Cannabis_sativa_GPPS_large_subunit_A0A1V0QSH4	AH3Ma.chr1	37.624	101	63	0	265	365	55932923	55932621	1.38e-10	67.8
Cannabis_sativa_GPPS_large_subunit_A0A1V0QSH4	AH3Ma.chr1	60.714	28	9	1	167	194	55933657	55933580	2.9	34.7
Cannabis_sativa_GPPS_small_subunit_A0A1V0QSG9	AH3Ma.chr6	97.484	318	8	0	9	326	42926453	42927406	0	603
Cannabis_sativa_GPPS_small_subunit_A0A1V0QSG9	AH3Ma.chr9	55.709	289	110	6	44	324	65397667	65396831	4.9e-83	278
Cannabis_sativa_GPPS_small_subunit_A0A1V0QSG9	AH3Ma.chr4	31.364	220	140	3	58	275	75297388	75296756	8.87e-23	103
Cannabis_sativa_GPPS_small_subunit_A0A1V0QSG9	AH3Ma.chrX	26.606	218	128	4	127	323	78420087	78420707	1.15e-06	54.7
Cannabis_sativa_GPPS_small_subunit_A0A1V0QSG9	AH3Ma.chrX	29.592	98	59	3	36	129	78419513	78419788	0.001	45.4
Cannabis_sativa_OAC_I6WU39	AH3Ma.chr9	75.373	134	0	1	1	101	62191670	62192071	3.35e-56	190
Cannabis_sativa_OAC_I6WU39	AH3Ma.chr9	71.852	135	4	1	1	101	62207347	62207751	2.03e-54	185
Cannabis_sativa_OAC_I6WU39	AH3Ma.chr9	35.938	128	44	1	10	99	62187539	62187922	1.88e-18	82.4
Cannabis_sativa_OAC_I6WU39	AH3Ma.chr9	34.559	136	48	2	3	97	61338840	61339247	6.53e-18	80.9
Cannabis_sativa_OAC_I6WU39	AH3Ma.chr9	33.835	133	52	2	3	99	61333964	61334362	3.53e-16	75.9
Cannabis_sativa_OAC_I6WU39	AH3Ma.chr9	48.333	60	31	0	40	99	62232353	62232532	1.33e-13	68.6
Cannabis_sativa_OAC_I6WU39	AH3Ma.chr9	42.5	40	23	0	3	42	62232085	62232204	2.54e-05	45.1
Cannabis_sativa_OAC_I6WU39	AH3Ma.chr5	23.75	80	56	2	12	90	35205712	35205485	0.83	32.3
Cannabis_sativa_OAC_I6WU39	AH3Ma.chr2	29.31	58	40	1	41	97	74297302	74297129	0.86	32.3
Cannabis_sativa_OAC_I6WU39	AH3Ma.chr1	19.802	101	73	2	1	97	38172615	38172905	1.7	31.2
Cannabis_sativa_OAC_I6WU39	AH3Ma.chr8	25	52	39	0	30	81	11495825	11495670	3.4	30.4
Cannabis_sativa_OLS_B1Q2B6	AH3Ma.chr8	99.401	334	2	0	52	385	5888510	5887509	0	685
Cannabis_sativa_OLS_B1Q2B6	AH3Ma.chr8	95.942	345	14	0	41	385	5875889	5876923	0	684
Cannabis_sativa_OLS_B1Q2B6	AH3Ma.chr8	69.832	179	53	1	54	231	5862808	5862272	4.85e-136	260
Cannabis_sativa_OLS_B1Q2B6	AH3Ma.chr8	75.472	159	39	0	226	384	5862290	5861814	4.85e-136	248
Cannabis_sativa_OLS_B1Q2B6	AH3Ma.chr8	72.449	98	27	0	284	381	5104039	5104332	6.09e-38	149
Cannabis_sativa_OLS_B1Q2B6	AH3Ma.chr8	98.113	53	1	0	1	53	5888827	5888669	1.18e-26	116
Cannabis_sativa_OLS_B1Q2B6	AH3Ma.chr8	98.113	53	1	0	1	53	5875641	5875799	1.79e-26	115
Cannabis_sativa_OLS_B1Q2B6	AH3Ma.chr8	63.265	49	18	0	5	53	5865714	5865568	1.01e-13	77.4
Cannabis_sativa_OLS_B1Q2B6	AH3Ma.chr8	23.276	232	136	9	155	368	18438971	18439594	0.16	38.5
Cannabis_sativa_OLS_B1Q2B6	AH3Ma.chr3	94.493	345	19	0	41	385	28298171	28299205	0	671
Cannabis_sativa_OLS_B1Q2B6	AH3Ma.chr3	98.113	53	1	0	1	53	28297899	28298057	1.49e-26	116
Cannabis_sativa_OLS_B1Q2B6	AH3Ma.chr9	70	330	99	0	54	383	53188353	53187364	1.2e-154	486
Cannabis_sativa_OLS_B1Q2B6	AH3Ma.chr9	68.06	335	106	1	49	383	64017728	64018729	4.37e-149	470
Cannabis_sativa_OLS_B1Q2B6	AH3Ma.chr9	61.667	60	20	1	5	61	64017090	64017269	1.67e-16	85.9
Cannabis_sativa_OLS_B1Q2B6	AH3Ma.chr9	64	50	18	0	4	53	53188600	53188451	2.23e-14	79.3
Cannabis_sativa_OLS_B1Q2B6	AH3Ma.chr9	34.722	72	42	2	297	368	52657070	52657270	0.084	39.7
Cannabis_sativa_OLS_B1Q2B6	AH3Ma.chrX	62.857	350	130	0	32	381	56275546	56274497	5.46e-151	476
Cannabis_sativa_OLS_B1Q2B6	AH3Ma.chrX	34.493	345	206	3	56	381	71657162	71656131	6.65e-64	225
Cannabis_sativa_OLS_B1Q2B6	AH3Ma.chrX	65.306	49	17	0	5	53	56279325	56279179	2.95e-14	79
Cannabis_sativa_OLS_B1Q2B6	AH3Ma.chrX	21.633	245	152	10	155	368	2898090	2897383	0.000753	46.2
Cannabis_sativa_OLS_B1Q2B6	AH3Ma.chrX	23.887	247	144	10	155	368	795209	795916	0.004	43.9
Cannabis_sativa_OLS_B1Q2B6	AH3Ma.chrX	30.588	85	52	3	297	381	66062073	66062306	0.97	36.2
Cannabis_sativa_OLS_B1Q2B6	AH3Ma.chrX	27.193	114	76	5	194	305	59350534	59350208	1.1	36.2
Cannabis_sativa_OLS_B1Q2B6	AH3Ma.chr1	56.757	333	139	3	54	383	16409157	16410149	3.23e-118	381
Cannabis_sativa_OLS_B1Q2B6	AH3Ma.chr1	47.727	44	23	0	10	53	16408762	16408893	0.000125	48.5
Cannabis_sativa_OLS_B1Q2B6	AH3Ma.chr1	23.077	247	146	9	155	368	51197961	51198668	0.016	42
Cannabis_sativa_OLS_B1Q2B6	AH3Ma.chr1	21.012	257	163	8	143	368	42436228	42435485	0.031	40.8
Cannabis_sativa_OLS_B1Q2B6	AH3Ma.chr1	26.606	109	74	3	258	360	12821782	12822108	1.8	35.4
Cannabis_sativa_OLS_B1Q2B6	AH3Ma.chr5	35.766	411	218	5	8	381	49900044	49898839	2.94e-75	258
Cannabis_sativa_OLS_B1Q2B6	AH3Ma.chr6	20.301	266	167	7	141	368	61133427	61134203	0.000793	46.2
Cannabis_sativa_OLS_B1Q2B6	AH3Ma.chr6	33.333	72	43	2	297	368	61175012	61175212	0.02	41.6
Cannabis_sativa_OLS_B1Q2B6	AH3Ma.chr6	30.588	85	52	3	297	381	37519919	37519686	0.077	39.7
Cannabis_sativa_OLS_B1Q2B6	AH3Ma.chr6	33.333	72	43	2	297	368	36486643	36486443	0.077	39.7
Cannabis_sativa_OLS_B1Q2B6	AH3Ma.chr2	21.318	258	165	11	141	368	21710171	21709422	0.004	43.9
Cannabis_sativa_OLS_B1Q2B6	AH3Ma.chr2	59.259	27	11	0	146	172	63352306	63352386	3.4	34.3
Cannabis_sativa_OLS_B1Q2B6	AH3Ma.chr2	30.435	69	43	2	297	360	3893169	3892963	4.8	33.9
Cannabis_sativa_OLS_B1Q2B6	AH3Ma.chr2	26.316	114	77	5	194	305	63993850	63993524	9	33.1
Cannabis_sativa_OLS_B1Q2B6	AH3Ma.chr4	31.944	72	44	2	297	368	1997335	1997135	0.023	41.2
Cannabis_sativa_OLS_B1Q2B6	AH3Ma.chr7	30.909	55	38	0	292	346	49231256	49231420	8.9	33.1
Cannabis_sativa_PT4_A0A455ZJC3	AH3Ma.chrX	80.128	156	3	1	121	248	55808476	55808943	2.44e-63	211
Cannabis_sativa_PT4_A0A455ZJC3	AH3Ma.chrX	78.125	32	7	0	241	272	55809035	55809130	2.44e-63	55.1
Cannabis_sativa_PT4_A0A455ZJC3	AH3Ma.chrX	93.671	79	5	0	1	79	55801288	55801524	3.29e-40	156
Cannabis_sativa_PT4_A0A455ZJC3	AH3Ma.chrX	46.857	175	34	4	1	122	55874121	55873615	9.9e-33	134
Cannabis_sativa_PT4_A0A455ZJC3	AH3Ma.chrX	71.014	69	20	0	175	243	55870489	55870283	1.57e-30	90.1
Cannabis_sativa_PT4_A0A455ZJC3	AH3Ma.chrX	62.745	51	19	0	124	174	55870725	55870573	1.57e-30	66.2
Cannabis_sativa_PT4_A0A455ZJC3	AH3Ma.chrX	81.667	60	10	1	1	60	55865568	55865392	1.02e-21	102
Cannabis_sativa_PT4_A0A455ZJC3	AH3Ma.chrX	97.826	46	1	0	77	122	55801861	55801998	2.73e-21	100
Cannabis_sativa_PT4_A0A455ZJC3	AH3Ma.chrX	69.231	78	24	0	168	245	55861203	55860970	3.42e-18	91.3
Cannabis_sativa_PT4_A0A455ZJC3	AH3Ma.chrX	88.889	27	3	0	372	398	55817406	55817486	2.54e-17	52.4
Cannabis_sativa_PT4_A0A455ZJC3	AH3Ma.chrX	72.222	36	9	1	329	364	55817050	55817154	2.54e-17	49.3
Cannabis_sativa_PT4_A0A455ZJC3	AH3Ma.chrX	83.333	18	1	1	359	374	55817270	55817323	2.54e-17	29.3
Cannabis_sativa_PT4_A0A455ZJC3	AH3Ma.chrX	97.561	41	1	0	303	343	55816297	55816419	6.32e-15	81.3
Cannabis_sativa_PT4_A0A455ZJC3	AH3Ma.chrX	53.659	41	19	0	303	343	55852241	55852119	6.8e-15	53.5
Cannabis_sativa_PT4_A0A455ZJC3	AH3Ma.chrX	50	40	20	0	265	304	55852447	55852328	6.8e-15	49.7
Cannabis_sativa_PT4_A0A455ZJC3	AH3Ma.chrX	47.778	90	43	1	172	257	55720873	55721142	5.39e-12	72
Cannabis_sativa_PT4_A0A455ZJC3	AH3Ma.chrX	97.059	34	1	0	271	304	55816010	55816111	1.24e-11	70.9
Cannabis_sativa_PT4_A0A455ZJC3	AH3Ma.chrX	52.703	74	34	1	172	244	64665180	64665401	1.73e-11	69.7
Cannabis_sativa_PT4_A0A455ZJC3	AH3Ma.chrX	38.462	26	16	0	247	272	64665497	64665574	1.73e-11	21.9
Cannabis_sativa_PT4_A0A455ZJC3	AH3Ma.chrX	36.842	133	52	3	172	272	64560915	64561313	1.06e-10	68.2
Cannabis_sativa_PT4_A0A455ZJC3	AH3Ma.chrX	45.349	86	46	1	173	257	64715771	64716028	1.15e-09	64.7
Cannabis_sativa_PT4_A0A455ZJC3	AH3Ma.chrX	54.902	51	23	0	122	172	55861764	55861612	2.39e-08	60.5
Cannabis_sativa_PT4_A0A455ZJC3	AH3Ma.chrX	30.476	105	40	1	273	344	64666454	64666768	8.77e-08	58.9
Cannabis_sativa_PT4_A0A455ZJC3	AH3Ma.chrX	42.857	42	24	0	303	344	64562074	64562199	1.1e-07	44.7
Cannabis_sativa_PT4_A0A455ZJC3	AH3Ma.chrX	40.625	32	19	0	272	303	64561880	64561975	1.1e-07	33.9
Cannabis_sativa_PT4_A0A455ZJC3	AH3Ma.chrX	54.762	42	19	0	303	344	55868578	55868453	1.32e-06	55.1
Cannabis_sativa_PT4_A0A455ZJC3	AH3Ma.chrX	51.111	45	20	1	78	122	55865160	55865032	5.11e-05	50.1
Cannabis_sativa_PT4_A0A455ZJC3	AH3Ma.chrX	33.824	68	33	1	278	345	55721621	55721788	0.000356	47.4
Cannabis_sativa_PT4_A0A455ZJC3	AH3Ma.chrX	30.252	119	47	3	90	172	55719547	55719903	0.000409	47
Cannabis_sativa_PT4_A0A455ZJC3	AH3Ma.chrX	48.78	41	21	0	264	304	55868832	55868710	0.001	45.8
Cannabis_sativa_PT4_A0A455ZJC3	AH3Ma.chrX	40.816	49	29	0	124	172	64664163	64664309	0.097	39.3
Cannabis_sativa_PT4_A0A455ZJC3	AH3Ma.chrX	40.385	52	31	0	121	172	64712207	64712362	0.15	38.9
Cannabis_sativa_PT4_A0A455ZJC3	AH3Ma.chrX	64	25	9	0	374	398	55867816	55867742	0.16	38.9
Cannabis_sativa_PT4_A0A455ZJC3	AH3Ma.chrX	61.29	31	12	0	342	372	55851381	55851289	0.18	38.5
Cannabis_sativa_PT4_A0A455ZJC3	AH3Ma.chrX	54.545	33	14	1	119	150	64559795	64559893	0.25	32
Cannabis_sativa_PT4_A0A455ZJC3	AH3Ma.chrX	81.818	11	2	0	162	172	64559931	64559963	0.25	23.5
Cannabis_sativa_PT4_A0A455ZJC3	AH3Ma.chrX	64	25	9	0	374	398	55851052	55850978	0.47	37.4
Cannabis_sativa_PT4_A0A455ZJC3	AH3Ma.chrX	56.757	37	16	0	331	367	55868208	55868098	0.49	37.4
Cannabis_sativa_PT4_A0A455ZJC3	AH3Ma.chrX	48.387	31	16	0	273	303	55721460	55721552	0.71	36.6
Cannabis_sativa_PT4_A0A455ZJC3	AH3Ma.chr8	31.915	141	61	2	166	272	32004113	32003694	1.72e-07	57.8
Cannabis_sativa_PT4_A0A455ZJC3	AH3Ma.chr8	34.043	94	33	1	303	367	32003065	32002784	9.14e-06	52.4
Cannabis_sativa_PT4_A0A455ZJC3	AH3Ma.chr8	39.583	48	29	0	125	172	32004726	32004583	0.011	42.4
Cannabis_sativa_PT4_A0A455ZJC3	AH3Ma.chr8	46.667	30	16	0	274	303	32003372	32003283	6	33.5
Cannabis_sativa_AAE1_H9A1V3	AH3Mb.chr3	95.556	90	3	1	131	219	45977945	45977676	5.24e-99	178
Cannabis_sativa_AAE1_H9A1V3	AH3Mb.chr3	100	68	0	0	218	285	45977562	45977359	5.24e-99	136
Cannabis_sativa_AAE1_H9A1V3	AH3Mb.chr3	89.796	49	5	0	88	136	45978162	45978016	5.24e-99	92.8
Cannabis_sativa_AAE1_H9A1V3	AH3Mb.chr3	98.851	87	1	0	1	87	45980586	45980326	9.47e-47	184
Cannabis_sativa_AAE1_H9A1V3	AH3Mb.chr3	54.802	177	36	5	88	223	46025103	46024582	1.95e-42	171
Cannabis_sativa_AAE1_H9A1V3	AH3Mb.chr3	92.405	79	6	0	469	547	45973611	45973375	9.36e-41	122
Cannabis_sativa_AAE1_H9A1V3	AH3Mb.chr3	89.474	38	4	0	434	471	45973832	45973719	9.36e-41	69.3
Cannabis_sativa_AAE1_H9A1V3	AH3Mb.chr3	100	74	0	0	366	439	45974306	45974085	1.34e-37	156
Cannabis_sativa_AAE1_H9A1V3	AH3Mb.chr3	90.476	84	3	2	531	613	45973252	45973013	3.99e-37	154
Cannabis_sativa_AAE1_H9A1V3	AH3Mb.chr3	78.824	85	18	0	355	439	46021634	46021380	1.35e-33	143
Cannabis_sativa_AAE1_H9A1V3	AH3Mb.chr3	91.892	74	2	1	626	699	45972294	45972085	2.83e-31	136
Cannabis_sativa_AAE1_H9A1V3	AH3Mb.chr3	73.171	82	22	0	5	86	46026140	46025895	4.74e-31	135
Cannabis_sativa_AAE1_H9A1V3	AH3Mb.chr3	85.714	70	10	0	544	613	46019864	46019655	3.73e-30	132
Cannabis_sativa_AAE1_H9A1V3	AH3Mb.chr3	82.353	68	12	0	218	285	46023620	46023417	2.88e-23	110
Cannabis_sativa_AAE1_H9A1V3	AH3Mb.chr3	72.308	65	18	0	626	690	46015356	46015162	6.49e-21	103
Cannabis_sativa_AAE1_H9A1V3	AH3Mb.chr3	70.667	75	22	0	469	543	46020318	46020094	3.31e-18	94.4
Cannabis_sativa_AAE1_H9A1V3	AH3Mb.chr3	91.837	49	4	0	293	341	45975446	45975300	6.73e-18	93.6
Cannabis_sativa_AAE1_H9A1V3	AH3Mb.chr3	62.791	43	16	0	299	341	46022914	46022786	3.51e-10	62.8
Cannabis_sativa_AAE1_H9A1V3	AH3Mb.chr3	66.667	15	5	0	284	298	46023072	46023028	3.51e-10	25.4
Cannabis_sativa_AAE1_H9A1V3	AH3Mb.chr3	90.625	32	3	0	440	471	46020568	46020473	1.4e-09	66.2
Cannabis_sativa_AAE1_H9A1V3	AH3Mb.chr3	100	31	0	0	690	720	45971928	45971836	1.83e-09	65.9
Cannabis_sativa_AAE1_H9A1V3	AH3Mb.chr3	96.154	26	1	0	341	366	45974841	45974764	8.44e-07	57.4
Cannabis_sativa_AAE1_H9A1V3	AH3Mb.chr3	75	32	8	0	689	720	46014986	46014891	1.39e-06	56.6
Cannabis_sativa_AAE1_H9A1V3	AH3Mb.chr3	58.537	41	17	0	332	372	46022014	46021892	4.78e-05	51.6
Cannabis_sativa_AAE1_H9A1V3	AH3Mb.chr3	21.695	295	194	11	188	471	16973485	16974291	0.016	43.1
Cannabis_sativa_AAE1_H9A1V3	AH3Mb.chr9	55	80	35	1	219	298	37006186	37005950	8.11e-42	80.9
Cannabis_sativa_AAE1_H9A1V3	AH3Mb.chr9	47.727	88	42	4	131	216	37006530	37006273	8.11e-42	79.3
Cannabis_sativa_AAE1_H9A1V3	AH3Mb.chr9	63.415	41	15	0	91	131	37006735	37006613	8.11e-42	55.5
Cannabis_sativa_AAE1_H9A1V3	AH3Mb.chr9	50.962	104	49	1	357	458	36886650	36886339	3.25e-25	117
Cannabis_sativa_AAE1_H9A1V3	AH3Mb.chr9	44	125	41	1	344	439	37004592	37004218	1.23e-24	115
Cannabis_sativa_AAE1_H9A1V3	AH3Mb.chr9	33.778	225	73	2	438	586	37003242	37002568	1.27e-23	112
Cannabis_sativa_AAE1_H9A1V3	AH3Mb.chr9	42.424	99	51	3	132	228	36888919	36888635	5.56e-23	78.6
Cannabis_sativa_AAE1_H9A1V3	AH3Mb.chr9	51.064	47	23	0	91	137	36889158	36889018	5.56e-23	53.1
Cannabis_sativa_AAE1_H9A1V3	AH3Mb.chr9	51.562	64	29	1	627	690	37002152	37001967	1.01e-20	70.5
Cannabis_sativa_AAE1_H9A1V3	AH3Mb.chr9	59.375	32	13	0	582	613	37002364	37002269	1.01e-20	42.4
Cannabis_sativa_AAE1_H9A1V3	AH3Mb.chr9	48.276	29	15	0	689	717	37001856	37001770	1.01e-20	30.8
Cannabis_sativa_AAE1_H9A1V3	AH3Mb.chr9	67.143	70	22	1	219	288	36888441	36888235	5.87e-16	87
Cannabis_sativa_AAE1_H9A1V3	AH3Mb.chr9	46.316	95	47	1	451	545	36885696	36885424	2.33e-10	68.9
Cannabis_sativa_AAE1_H9A1V3	AH3Mb.chr9	47.887	71	34	2	626	696	36884664	36884461	3.72e-10	68.2
Cannabis_sativa_AAE1_H9A1V3	AH3Mb.chr9	43.137	51	27	1	423	471	36885878	36885726	0.00016	49.7
Cannabis_sativa_AAE1_H9A1V3	AH3Mb.chr9	48.837	43	22	0	544	586	36885260	36885132	0.000352	48.5
Cannabis_sativa_AAE1_H9A1V3	AH3Mb.chr9	47.059	51	23	1	299	345	37005210	37005058	0.002	45.8
Cannabis_sativa_AAE1_H9A1V3	AH3Mb.chr9	55.882	34	15	0	580	613	36884905	36884804	0.018	43.1
Cannabis_sativa_AAE1_H9A1V3	AH3Mb.chr9	55.556	36	16	0	299	334	36887406	36887299	0.022	42.7
Cannabis_sativa_AAE1_H9A1V3	AH3Mb.chr9	50	30	13	1	689	718	36884317	36884234	8.7	34.3
Cannabis_sativa_AAE1_H9A1V3	AH3Mb.chr5	24.907	269	161	10	219	471	2152840	2152109	3.74e-06	55.1
Cannabis_sativa_AAE1_H9A1V3	AH3Mb.chr5	21.362	323	216	8	170	475	48053180	48054085	0.26	39.3
Cannabis_sativa_AAE1_H9A1V3	AH3Mb.chr8	22.989	261	177	7	223	477	18006890	18006162	3.49e-05	52
Cannabis_sativa_AAE1_H9A1V3	AH3Mb.chr8	23.569	297	188	10	199	485	50550608	50549805	0.005	45.1
Cannabis_sativa_AAE1_H9A1V3	AH3Mb.chr8	36.538	52	32	1	165	216	49190564	49190716	0.21	32
Cannabis_sativa_AAE1_H9A1V3	AH3Mb.chr8	24.762	105	49	1	223	297	49190835	49191149	0.21	25
Cannabis_sativa_AAE1_H9A1V3	AH3Mb.chr6	23.774	265	181	8	219	477	72078547	72079296	0.014	43.5
Cannabis_sativa_AAE1_H9A1V3	AH3Mb.chr6	30.597	134	79	6	353	477	72093744	72094130	0.16	40
Cannabis_sativa_AAE1_H9A1V3	AH3Mb.chrY	20.673	208	146	5	247	453	192455	193024	6.8	34.7
Cannabis_sativa_GPPS_large_subunit_A0A1V0QSH4	AH3Mb.chr4	100	393	0	0	1	393	74652189	74651011	0	778
Cannabis_sativa_GPPS_large_subunit_A0A1V0QSH4	AH3Mb.chrY	41.15	226	113	6	173	391	5242745	5242107	7.55e-37	146
Cannabis_sativa_GPPS_large_subunit_A0A1V0QSH4	AH3Mb.chrY	40.26	77	45	1	100	175	5243274	5243044	9.07e-12	71.2
Cannabis_sativa_GPPS_large_subunit_A0A1V0QSH4	AH3Mb.chr6	30.942	223	143	3	101	314	34778707	34778045	3.38e-21	100
Cannabis_sativa_GPPS_large_subunit_A0A1V0QSH4	AH3Mb.chr9	27.273	220	146	4	104	314	64573596	64572952	1.16e-16	86.7
Cannabis_sativa_GPPS_large_subunit_A0A1V0QSH4	AH3Mb.chr1	37.624	101	63	0	265	365	56582426	56582124	1.42e-10	67.8
Cannabis_sativa_GPPS_large_subunit_A0A1V0QSH4	AH3Mb.chr1	60.714	28	9	1	167	194	56583160	56583083	2.9	34.7
Cannabis_sativa_GPPS_large_subunit_A0A1V0QSH4	AH3Mb.chr7	66.667	42	14	0	48	89	53551167	53551042	7.26e-08	58.9
Cannabis_sativa_GPPS_small_subunit_A0A1V0QSG9	AH3Mb.chr6	100	318	0	0	9	326	34778845	34777892	0	617
Cannabis_sativa_GPPS_small_subunit_A0A1V0QSG9	AH3Mb.chr9	55.709	289	110	6	44	324	64573653	64572817	4.93e-83	278
Cannabis_sativa_GPPS_small_subunit_A0A1V0QSG9	AH3Mb.chr4	31.364	220	140	3	58	275	74651880	74651248	9.02e-23	103
Cannabis_sativa_GPPS_small_subunit_A0A1V0QSG9	AH3Mb.chrY	26.606	218	128	4	127	323	5242745	5242125	1.16e-06	54.7
Cannabis_sativa_GPPS_small_subunit_A0A1V0QSG9	AH3Mb.chrY	29.592	98	59	3	36	129	5243319	5243044	0.001	45.4
Cannabis_sativa_OAC_I6WU39	AH3Mb.chr9	100	59	0	0	43	101	61400416	61400592	5.12e-48	124
Cannabis_sativa_OAC_I6WU39	AH3Mb.chr9	100	59	0	0	43	101	61408541	61408717	5.12e-48	124
Cannabis_sativa_OAC_I6WU39	AH3Mb.chr9	100	42	0	0	1	42	61400190	61400315	5.12e-48	86.7
Cannabis_sativa_OAC_I6WU39	AH3Mb.chr9	100	42	0	0	1	42	61408315	61408440	5.12e-48	86.7
Cannabis_sativa_OAC_I6WU39	AH3Mb.chr9	34.351	131	53	2	2	99	60600688	60601080	2.08e-16	76.6
Cannabis_sativa_OAC_I6WU39	AH3Mb.chr9	48.333	60	31	0	40	99	61430473	61430652	1.34e-13	68.6
Cannabis_sativa_OAC_I6WU39	AH3Mb.chr9	48.98	49	25	0	49	97	60605800	60605946	3.01e-09	56.2
Cannabis_sativa_OAC_I6WU39	AH3Mb.chr9	52.778	36	17	0	3	38	60605549	60605656	4.35e-06	47.4
Cannabis_sativa_OAC_I6WU39	AH3Mb.chr9	42.5	40	23	0	3	42	61430205	61430324	2.56e-05	45.1
Cannabis_sativa_OAC_I6WU39	AH3Mb.chr2	27.848	79	54	2	20	97	74301058	74300828	0.17	34.3
Cannabis_sativa_OAC_I6WU39	AH3Mb.chr5	23.75	80	56	2	12	90	44417294	44417521	0.84	32.3
Cannabis_sativa_OAC_I6WU39	AH3Mb.chr1	19.802	101	73	2	1	97	38885133	38885423	1.8	31.2
Cannabis_sativa_OAC_I6WU39	AH3Mb.chr8	25	52	39	0	30	81	43764758	43764913	4.2	30
Cannabis_sativa_OLS_B1Q2B6	AH3Mb.chr8	87.156	436	5	1	1	385	49317192	49315885	0	765
Cannabis_sativa_OLS_B1Q2B6	AH3Mb.chr8	98.802	334	4	0	52	385	49303707	49304708	0	682
Cannabis_sativa_OLS_B1Q2B6	AH3Mb.chr8	73.494	332	87	1	54	384	49341836	49342831	2e-160	503
Cannabis_sativa_OLS_B1Q2B6	AH3Mb.chr8	74.49	98	25	0	284	381	50113459	50113166	4.97e-39	152
Cannabis_sativa_OLS_B1Q2B6	AH3Mb.chr8	98.113	53	1	0	1	53	49303408	49303566	2.08e-26	115
Cannabis_sativa_OLS_B1Q2B6	AH3Mb.chr8	61.224	49	19	0	5	53	49338885	49339031	8.41e-14	77.4
Cannabis_sativa_OLS_B1Q2B6	AH3Mb.chr8	23.276	232	136	9	155	368	36487489	36486866	0.22	38.1
Cannabis_sativa_OLS_B1Q2B6	AH3Mb.chr8	28.571	63	42	1	302	361	50298752	50298940	9.7	33.1
Cannabis_sativa_OLS_B1Q2B6	AH3Mb.chrY	62.857	350	130	0	32	381	27387234	27388283	5.5e-151	476
Cannabis_sativa_OLS_B1Q2B6	AH3Mb.chrY	53.177	299	135	3	85	380	45456723	45457613	4.7e-96	318
Cannabis_sativa_OLS_B1Q2B6	AH3Mb.chrY	34.493	345	206	3	56	381	12012584	12013615	6.7e-64	225
Cannabis_sativa_OLS_B1Q2B6	AH3Mb.chrY	65.306	49	17	0	5	53	27383455	27383601	2.97e-14	79
Cannabis_sativa_OLS_B1Q2B6	AH3Mb.chrY	50	40	20	0	10	49	45454028	45454147	0.003	44.3
Cannabis_sativa_OLS_B1Q2B6	AH3Mb.chrY	30.588	85	52	3	297	381	17607584	17607351	0.98	36.2
Cannabis_sativa_OLS_B1Q2B6	AH3Mb.chrY	27.193	114	76	5	194	305	24312247	24312573	1.1	36.2
Cannabis_sativa_OLS_B1Q2B6	AH3Mb.chrY	29.213	89	50	3	210	290	74284801	74285052	7	33.5
Cannabis_sativa_OLS_B1Q2B6	AH3Mb.chr9	68.06	335	106	1	49	383	63193715	63194716	4.41e-149	470
Cannabis_sativa_OLS_B1Q2B6	AH3Mb.chr9	70.979	286	82	1	98	383	52495366	52494512	4.54e-135	430
Cannabis_sativa_OLS_B1Q2B6	AH3Mb.chr9	65.306	49	17	0	5	53	52495743	52495597	1.58e-24	80.1
Cannabis_sativa_OLS_B1Q2B6	AH3Mb.chr9	50	58	29	0	54	111	52495499	52495326	1.58e-24	55.8
Cannabis_sativa_OLS_B1Q2B6	AH3Mb.chr9	61.667	60	20	1	5	61	63193077	63193256	1.68e-16	85.9
Cannabis_sativa_OLS_B1Q2B6	AH3Mb.chr9	34.722	72	42	2	297	368	51884174	51884374	0.072	39.7
Cannabis_sativa_OLS_B1Q2B6	AH3Mb.chr1	56.456	333	140	3	54	383	1307124	1306132	2.34e-119	385
Cannabis_sativa_OLS_B1Q2B6	AH3Mb.chr1	50	44	22	0	10	53	1307538	1307407	6.69e-05	49.7
Cannabis_sativa_OLS_B1Q2B6	AH3Mb.chr1	23.077	247	146	9	155	368	51840577	51841284	0.016	42
Cannabis_sativa_OLS_B1Q2B6	AH3Mb.chr1	21.012	257	163	8	143	368	43158426	43157683	0.032	40.8
Cannabis_sativa_OLS_B1Q2B6	AH3Mb.chr1	26.606	109	74	3	258	360	4461039	4461365	1.4	35.8
Cannabis_sativa_OLS_B1Q2B6	AH3Mb.chr5	35.766	411	218	5	8	381	27366624	27367829	3.69e-75	258
Cannabis_sativa_OLS_B1Q2B6	AH3Mb.chr2	21.154	260	165	11	141	368	21383527	21382772	0.004	43.9
Cannabis_sativa_OLS_B1Q2B6	AH3Mb.chr2	30.435	69	43	2	297	360	3675791	3675585	4.9	33.9
Cannabis_sativa_OLS_B1Q2B6	AH3Mb.chr6	19.549	266	169	8	141	368	16258317	16257541	0.004	43.9
Cannabis_sativa_OLS_B1Q2B6	AH3Mb.chr6	33.333	72	43	2	297	368	16207210	16207010	0.02	41.6
Cannabis_sativa_OLS_B1Q2B6	AH3Mb.chr6	26.087	138	93	5	234	368	39700036	39700431	0.021	41.6
Cannabis_sativa_OLS_B1Q2B6	AH3Mb.chr6	33.333	72	43	2	297	368	40549294	40549494	0.083	39.7
Cannabis_sativa_OLS_B1Q2B6	AH3Mb.chr4	31.944	72	44	2	297	368	1810354	1810154	0.012	42.4
Cannabis_sativa_PT4_A0A455ZJC3	AH3Mb.chrY	80.128	156	3	1	121	248	27854304	27853837	2.46e-63	211
Cannabis_sativa_PT4_A0A455ZJC3	AH3Mb.chrY	78.125	32	7	0	241	272	27853745	27853650	2.46e-63	55.1
Cannabis_sativa_PT4_A0A455ZJC3	AH3Mb.chrY	93.671	79	5	0	1	79	27861492	27861256	3.32e-40	156
Cannabis_sativa_PT4_A0A455ZJC3	AH3Mb.chrY	46.857	175	34	4	1	122	27788659	27789165	9.98e-33	134
Cannabis_sativa_PT4_A0A455ZJC3	AH3Mb.chrY	71.014	69	20	0	175	243	27792291	27792497	1.57e-30	90.1
Cannabis_sativa_PT4_A0A455ZJC3	AH3Mb.chrY	62.745	51	19	0	124	174	27792055	27792207	1.57e-30	66.2
Cannabis_sativa_PT4_A0A455ZJC3	AH3Mb.chrY	81.667	60	10	1	1	60	27797212	27797388	1.03e-21	102
Cannabis_sativa_PT4_A0A455ZJC3	AH3Mb.chrY	97.826	46	1	0	77	122	27860919	27860782	2.75e-21	100
Cannabis_sativa_PT4_A0A455ZJC3	AH3Mb.chrY	69.231	78	24	0	168	245	27801577	27801810	3.44e-18	91.3
Cannabis_sativa_PT4_A0A455ZJC3	AH3Mb.chrY	88.889	27	3	0	372	398	27845374	27845294	2.53e-17	52.4
Cannabis_sativa_PT4_A0A455ZJC3	AH3Mb.chrY	72.222	36	9	1	329	364	27845730	27845626	2.53e-17	49.3
Cannabis_sativa_PT4_A0A455ZJC3	AH3Mb.chrY	83.333	18	1	1	359	374	27845510	27845457	2.53e-17	29.3
Cannabis_sativa_PT4_A0A455ZJC3	AH3Mb.chrY	97.561	41	1	0	303	343	27846483	27846361	6.37e-15	81.3
Cannabis_sativa_PT4_A0A455ZJC3	AH3Mb.chrY	53.659	41	19	0	303	343	27810539	27810661	6.8e-15	53.5
Cannabis_sativa_PT4_A0A455ZJC3	AH3Mb.chrY	50	40	20	0	265	304	27810333	27810452	6.8e-15	49.7
Cannabis_sativa_PT4_A0A455ZJC3	AH3Mb.chrY	47.778	90	43	1	172	257	27941907	27941638	5.43e-12	72
Cannabis_sativa_PT4_A0A455ZJC3	AH3Mb.chrY	97.059	34	1	0	271	304	27846770	27846669	1.25e-11	70.9
Cannabis_sativa_PT4_A0A455ZJC3	AH3Mb.chrY	52.703	74	34	1	172	244	19613270	19613049	1.73e-11	69.7
Cannabis_sativa_PT4_A0A455ZJC3	AH3Mb.chrY	38.462	26	16	0	247	272	19612953	19612876	1.73e-11	21.9
Cannabis_sativa_PT4_A0A455ZJC3	AH3Mb.chrY	36.842	133	52	3	172	272	19717535	19717137	1.07e-10	68.2
Cannabis_sativa_PT4_A0A455ZJC3	AH3Mb.chrY	45.349	86	46	1	173	257	19562679	19562422	1.16e-09	64.7
Cannabis_sativa_PT4_A0A455ZJC3	AH3Mb.chrY	54.902	51	23	0	122	172	27801016	27801168	2.41e-08	60.5
Cannabis_sativa_PT4_A0A455ZJC3	AH3Mb.chrY	30.476	105	40	1	273	344	19611996	19611682	8.84e-08	58.9
Cannabis_sativa_PT4_A0A455ZJC3	AH3Mb.chrY	42.857	42	24	0	303	344	19716376	19716251	1.1e-07	44.7
Cannabis_sativa_PT4_A0A455ZJC3	AH3Mb.chrY	40.625	32	19	0	272	303	19716570	19716475	1.1e-07	33.9
Cannabis_sativa_PT4_A0A455ZJC3	AH3Mb.chrY	54.762	42	19	0	303	344	27794202	27794327	1.33e-06	55.1
Cannabis_sativa_PT4_A0A455ZJC3	AH3Mb.chrY	51.111	45	20	1	78	122	27797620	27797748	5.15e-05	50.1
Cannabis_sativa_PT4_A0A455ZJC3	AH3Mb.chrY	33.824	68	33	1	278	345	27941159	27940992	0.000359	47.4
Cannabis_sativa_PT4_A0A455ZJC3	AH3Mb.chrY	30.252	119	47	3	90	172	27943233	27942877	0.000412	47
Cannabis_sativa_PT4_A0A455ZJC3	AH3Mb.chrY	48.78	41	21	0	264	304	27793948	27794070	0.001	45.8
Cannabis_sativa_PT4_A0A455ZJC3	AH3Mb.chrY	40.816	49	29	0	124	172	19614287	19614141	0.098	39.3
Cannabis_sativa_PT4_A0A455ZJC3	AH3Mb.chrY	40.385	52	31	0	121	172	19566243	19566088	0.15	38.9
Cannabis_sativa_PT4_A0A455ZJC3	AH3Mb.chrY	64	25	9	0	374	398	27794964	27795038	0.17	38.9
Cannabis_sativa_PT4_A0A455ZJC3	AH3Mb.chrY	61.29	31	12	0	342	372	27811399	27811491	0.18	38.5
Cannabis_sativa_PT4_A0A455ZJC3	AH3Mb.chrY	54.545	33	14	1	119	150	19718655	19718557	0.24	32
Cannabis_sativa_PT4_A0A455ZJC3	AH3Mb.chrY	81.818	11	2	0	162	172	19718519	19718487	0.24	23.5
Cannabis_sativa_PT4_A0A455ZJC3	AH3Mb.chrY	64	25	9	0	374	398	27811728	27811802	0.48	37.4
Cannabis_sativa_PT4_A0A455ZJC3	AH3Mb.chrY	56.757	37	16	0	331	367	27794572	27794682	0.5	37.4
Cannabis_sativa_PT4_A0A455ZJC3	AH3Mb.chrY	48.387	31	16	0	273	303	27941320	27941228	0.72	36.6
Cannabis_sativa_PT4_A0A455ZJC3	AH3Mb.chr8	31.915	141	61	2	166	272	22700318	22700737	1.73e-07	57.8
Cannabis_sativa_PT4_A0A455ZJC3	AH3Mb.chr8	34.043	94	33	1	303	367	22701366	22701647	9.21e-06	52.4
Cannabis_sativa_PT4_A0A455ZJC3	AH3Mb.chr8	39.583	48	29	0	125	172	22699705	22699848	0.011	42.4
Cannabis_sativa_PT4_A0A455ZJC3	AH3Mb.chr8	46.667	30	16	0	274	303	22701059	22701148	6.1	33.5
Cannabis_sativa_PT4_A0A455ZJC3	AH3Mb.chr8	42.424	33	19	0	172	204	22682594	22682692	6.4	33.5
Cannabis_sativa_PT4_A0A455ZJC3	AH3Mb.chr6	31.746	63	42	1	112	173	73542016	73541828	0.075	39.7
Cannabis_sativa_PT4_A0A455ZJC3	AH3Mb.chr6	29.474	95	37	2	125	190	73552374	73552093	1.8	35.4
Cannabis_sativa_PT4_A0A455ZJC3	AH3Mb.chr1	32.258	62	41	1	112	172	20054569	20054384	0.41	37.4
Cannabis_sativa_PT4_A0A455ZJC3	AH3Mb.chr3	46.667	30	16	0	2	31	43814039	43814128	5.1	33.9
Cannabis_sativa_AAE1_H9A1V3	BCMa.chr3	96.667	90	2	1	131	219	50853657	50853388	1.48e-99	179
Cannabis_sativa_AAE1_H9A1V3	BCMa.chr3	95.775	71	3	0	218	288	50853274	50853062	1.48e-99	137
Cannabis_sativa_AAE1_H9A1V3	BCMa.chr3	89.796	49	5	0	88	136	50853874	50853728	1.48e-99	92.8
Cannabis_sativa_AAE1_H9A1V3	BCMa.chr3	98.851	87	1	0	1	87	50856281	50856021	9.36e-47	184
Cannabis_sativa_AAE1_H9A1V3	BCMa.chr3	53.977	176	38	5	88	223	50910343	50909825	4.01e-41	167
Cannabis_sativa_AAE1_H9A1V3	BCMa.chr3	92.405	79	6	0	469	547	50847714	50847478	2.57e-40	122
Cannabis_sativa_AAE1_H9A1V3	BCMa.chr3	86.842	38	5	0	434	471	50847935	50847822	2.57e-40	67.8
Cannabis_sativa_AAE1_H9A1V3	BCMa.chr3	90.476	84	3	2	531	613	50847355	50847116	3.94e-37	154
Cannabis_sativa_AAE1_H9A1V3	BCMa.chr3	97.297	74	2	0	366	439	50848408	50848187	1.27e-36	153
Cannabis_sativa_AAE1_H9A1V3	BCMa.chr3	78.824	85	18	0	355	439	50906877	50906623	1.34e-33	143
Cannabis_sativa_AAE1_H9A1V3	BCMa.chr3	93.243	74	1	1	626	699	50841427	50841218	1.88e-31	136
Cannabis_sativa_AAE1_H9A1V3	BCMa.chr3	73.171	82	22	0	5	86	50911390	50911145	7.37e-31	135
Cannabis_sativa_AAE1_H9A1V3	BCMa.chr3	85.714	70	10	0	544	613	50905069	50904860	3.68e-30	132
Cannabis_sativa_AAE1_H9A1V3	BCMa.chr3	82.353	68	12	0	218	285	50908864	50908661	2.84e-23	110
Cannabis_sativa_AAE1_H9A1V3	BCMa.chr3	72.308	65	18	0	626	690	50900583	50900389	7.47e-21	102
Cannabis_sativa_AAE1_H9A1V3	BCMa.chr3	70.667	75	22	0	469	543	50905523	50905299	1.68e-18	95.5
Cannabis_sativa_AAE1_H9A1V3	BCMa.chr3	91.837	49	4	0	293	341	50849545	50849399	6.65e-18	93.6
Cannabis_sativa_AAE1_H9A1V3	BCMa.chr3	62.791	43	16	0	299	341	50908163	50908035	2.48e-10	63.5
Cannabis_sativa_AAE1_H9A1V3	BCMa.chr3	66.667	15	5	0	284	298	50908315	50908271	2.48e-10	25.4
Cannabis_sativa_AAE1_H9A1V3	BCMa.chr3	90.625	32	3	0	440	471	50905773	50905678	1.38e-09	66.2
Cannabis_sativa_AAE1_H9A1V3	BCMa.chr3	100	31	0	0	690	720	50841060	50840968	1.81e-09	65.9
Cannabis_sativa_AAE1_H9A1V3	BCMa.chr3	96.154	26	1	0	341	366	50848942	50848865	8.84e-07	57
Cannabis_sativa_AAE1_H9A1V3	BCMa.chr3	75	32	8	0	689	720	50900215	50900120	1.37e-06	56.6
Cannabis_sativa_AAE1_H9A1V3	BCMa.chr3	58.537	41	17	0	332	372	50907257	50907135	4.68e-05	51.6
Cannabis_sativa_AAE1_H9A1V3	BCMa.chr3	21.695	295	194	11	188	471	21869594	21870400	0.015	43.1
Cannabis_sativa_AAE1_H9A1V3	BCMa.chr9	61.429	70	26	1	219	288	36006656	36006450	5.77e-42	81.3
Cannabis_sativa_AAE1_H9A1V3	BCMa.chr9	47.727	88	42	4	131	216	36007000	36006743	5.77e-42	79.3
Cannabis_sativa_AAE1_H9A1V3	BCMa.chr9	63.415	41	15	0	91	131	36007205	36007083	5.77e-42	55.5
Cannabis_sativa_AAE1_H9A1V3	BCMa.chr9	50.962	104	49	1	357	458	35845719	35845408	3.21e-25	117
Cannabis_sativa_AAE1_H9A1V3	BCMa.chr9	44	125	41	1	344	439	36005063	36004689	1.21e-24	115
Cannabis_sativa_AAE1_H9A1V3	BCMa.chr9	33.628	226	74	2	437	586	36003716	36003039	1.88e-23	111
Cannabis_sativa_AAE1_H9A1V3	BCMa.chr9	42.424	99	51	3	132	228	35847987	35847703	5.49e-23	78.6
Cannabis_sativa_AAE1_H9A1V3	BCMa.chr9	51.064	47	23	0	91	137	35848226	35848086	5.49e-23	53.1
Cannabis_sativa_AAE1_H9A1V3	BCMa.chr9	36.816	201	62	3	581	718	36002838	36002242	2e-20	101
Cannabis_sativa_AAE1_H9A1V3	BCMa.chr9	67.143	70	22	1	219	288	35847509	35847303	5.79e-16	87
Cannabis_sativa_AAE1_H9A1V3	BCMa.chr9	46.316	95	47	1	451	545	35844765	35844493	2.3e-10	68.9
Cannabis_sativa_AAE1_H9A1V3	BCMa.chr9	47.887	71	34	2	626	696	35843733	35843530	3.67e-10	68.2
Cannabis_sativa_AAE1_H9A1V3	BCMa.chr9	43.137	51	27	1	423	471	35844947	35844795	0.000158	49.7
Cannabis_sativa_AAE1_H9A1V3	BCMa.chr9	48.837	43	22	0	544	586	35844329	35844201	0.000347	48.5
Cannabis_sativa_AAE1_H9A1V3	BCMa.chr9	47.059	51	23	1	299	345	36005680	36005528	0.002	45.8
Cannabis_sativa_AAE1_H9A1V3	BCMa.chr9	55.882	34	15	0	580	613	35843974	35843873	0.018	43.1
Cannabis_sativa_AAE1_H9A1V3	BCMa.chr9	55.556	36	16	0	299	334	35846474	35846367	0.022	42.7
Cannabis_sativa_AAE1_H9A1V3	BCMa.chr9	50	30	13	1	689	718	35843386	35843303	8.6	34.3
Cannabis_sativa_AAE1_H9A1V3	BCMa.chr5	24.535	269	162	10	219	471	2834747	2834016	8.99e-06	53.9
Cannabis_sativa_AAE1_H9A1V3	BCMa.chr5	21.362	323	216	8	170	475	46212063	46212968	0.25	39.3
Cannabis_sativa_AAE1_H9A1V3	BCMa.chr8	22.989	261	177	7	223	477	17295999	17295271	3.45e-05	52
Cannabis_sativa_AAE1_H9A1V3	BCMa.chr8	36.538	52	32	1	165	216	48661488	48661640	0.21	32
Cannabis_sativa_AAE1_H9A1V3	BCMa.chr8	24.762	105	49	1	223	297	48661759	48662073	0.21	25
Cannabis_sativa_AAE1_H9A1V3	BCMa.chr6	23.774	265	181	8	219	477	3296465	3295716	0.014	43.5
Cannabis_sativa_AAE1_H9A1V3	BCMa.chr6	31.496	127	73	6	360	477	3284750	3284385	0.14	40
Cannabis_sativa_AAE1_H9A1V3	BCMa.chrX	20.701	314	226	7	174	477	65427082	65427984	2.7	35.8
Cannabis_sativa_AAE1_H9A1V3	BCMa.chrX	20.673	208	146	5	247	453	247184	247753	6.1	34.7
Cannabis_sativa_AAE1_H9A1V3	BCMa.chr4	20	195	128	4	206	399	72902418	72901915	5.5	35
Cannabis_sativa_GPPS_large_subunit_A0A1V0QSH4	BCMa.chr4	97.964	393	8	0	1	393	5154768	5153590	0	764
Cannabis_sativa_GPPS_large_subunit_A0A1V0QSH4	BCMa.chrX	41.15	226	113	6	173	391	5126641	5126003	7.46e-37	146
Cannabis_sativa_GPPS_large_subunit_A0A1V0QSH4	BCMa.chrX	40.26	77	45	1	100	175	5127196	5126966	8.96e-12	71.2
Cannabis_sativa_GPPS_large_subunit_A0A1V0QSH4	BCMa.chr6	30.493	223	144	3	101	314	40766128	40766790	1e-20	99
Cannabis_sativa_GPPS_large_subunit_A0A1V0QSH4	BCMa.chr9	27.273	220	146	4	104	314	64241208	64240564	3.74e-17	88.2
Cannabis_sativa_GPPS_large_subunit_A0A1V0QSH4	BCMa.chr1	37.624	101	63	0	265	365	9910950	9911252	1.38e-10	67.8
Cannabis_sativa_GPPS_large_subunit_A0A1V0QSH4	BCMa.chr1	60.714	28	9	1	167	194	9910216	9910293	2.8	34.7
Cannabis_sativa_GPPS_small_subunit_A0A1V0QSG9	BCMa.chr6	96.855	318	10	0	9	326	40765990	40766943	0	598
Cannabis_sativa_GPPS_small_subunit_A0A1V0QSG9	BCMa.chr9	56.055	289	109	6	44	324	64241265	64240429	7.3e-84	280
Cannabis_sativa_GPPS_small_subunit_A0A1V0QSG9	BCMa.chr4	31.364	220	140	3	58	275	5154459	5153827	7.12e-23	103
Cannabis_sativa_GPPS_small_subunit_A0A1V0QSG9	BCMa.chrX	26.606	218	128	4	127	323	5126641	5126021	1.15e-06	54.7
Cannabis_sativa_GPPS_small_subunit_A0A1V0QSG9	BCMa.chrX	29.592	98	59	3	36	129	5127241	5126966	0.001	45.4
Cannabis_sativa_OAC_I6WU39	BCMa.chr9	73.881	134	2	1	1	101	61020212	61020613	1.2e-55	188
Cannabis_sativa_OAC_I6WU39	BCMa.chr9	100	59	0	0	43	101	61009857	61010033	5.06e-48	124
Cannabis_sativa_OAC_I6WU39	BCMa.chr9	100	42	0	0	1	42	61009631	61009756	5.06e-48	86.7
Cannabis_sativa_OAC_I6WU39	BCMa.chr9	39.516	124	46	3	3	97	60041007	60041378	1.61e-19	85.5
Cannabis_sativa_OAC_I6WU39	BCMa.chr9	47.541	61	31	1	40	99	60036381	60036563	4.06e-15	57.8
Cannabis_sativa_OAC_I6WU39	BCMa.chr9	45	40	22	0	3	42	60036160	60036279	4.06e-15	42.7
Cannabis_sativa_OAC_I6WU39	BCMa.chr9	48.333	60	31	0	40	99	61040833	61041012	1.2e-13	68.9
Cannabis_sativa_OAC_I6WU39	BCMa.chr9	42.5	40	23	0	3	42	61040565	61040684	2.53e-05	45.1
Cannabis_sativa_OAC_I6WU39	BCMa.chr2	29.31	58	40	1	41	97	1838346	1838519	0.85	32.3
Cannabis_sativa_OAC_I6WU39	BCMa.chr1	19.802	101	73	2	1	97	27572746	27572456	1.7	31.2
Cannabis_sativa_OAC_I6WU39	BCMa.chr8	25	52	39	0	30	81	43162801	43162956	6.2	29.6
Cannabis_sativa_OLS_B1Q2B6	BCMa.chr8	98.204	334	6	0	52	385	48799343	48798342	0	677
Cannabis_sativa_OLS_B1Q2B6	BCMa.chr8	98.204	334	6	0	52	385	48777516	48778517	0	677
Cannabis_sativa_OLS_B1Q2B6	BCMa.chr8	73.193	332	88	1	54	384	48823610	48824605	4e-160	502
Cannabis_sativa_OLS_B1Q2B6	BCMa.chr8	46.875	96	43	1	251	346	49564964	49564701	5.44e-28	82.4
Cannabis_sativa_OLS_B1Q2B6	BCMa.chr8	79.487	39	8	0	343	381	49564711	49564595	5.44e-28	65.1
Cannabis_sativa_OLS_B1Q2B6	BCMa.chr8	98.113	53	1	0	1	53	48799662	48799504	2.99e-27	118
Cannabis_sativa_OLS_B1Q2B6	BCMa.chr8	94.34	53	3	0	1	53	48777199	48777357	2.59e-25	112
Cannabis_sativa_OLS_B1Q2B6	BCMa.chr8	65.306	49	17	0	5	53	48821389	48821535	3.51e-14	78.6
Cannabis_sativa_OLS_B1Q2B6	BCMa.chr8	23.276	232	136	9	155	368	36140052	36139429	0.2	38.5
Cannabis_sativa_OLS_B1Q2B6	BCMa.chr9	70	330	99	0	54	383	51514462	51513473	1.28e-154	486
Cannabis_sativa_OLS_B1Q2B6	BCMa.chr9	68.06	335	106	1	49	383	62868870	62869871	4.35e-149	470
Cannabis_sativa_OLS_B1Q2B6	BCMa.chr9	64.815	54	19	0	5	58	62868237	62868398	1.78e-16	85.9
Cannabis_sativa_OLS_B1Q2B6	BCMa.chr9	65.306	49	17	0	5	53	51514706	51514560	1.61e-14	79.7
Cannabis_sativa_OLS_B1Q2B6	BCMa.chr9	34.722	72	42	2	297	368	50946048	50946248	0.071	39.7
Cannabis_sativa_OLS_B1Q2B6	BCMa.chrX	65.854	328	112	0	54	381	27320757	27321740	3.5e-150	473
Cannabis_sativa_OLS_B1Q2B6	BCMa.chrX	36.176	340	202	4	56	381	11811277	11812293	1.83e-66	232
Cannabis_sativa_OLS_B1Q2B6	BCMa.chrX	65.306	49	17	0	5	53	27319312	27319458	2.86e-14	79
Cannabis_sativa_OLS_B1Q2B6	BCMa.chrX	21.224	245	153	10	155	368	80206280	80206987	0.003	44.3
Cannabis_sativa_OLS_B1Q2B6	BCMa.chrX	23.887	247	144	10	155	368	82559473	82558766	0.004	43.9
Cannabis_sativa_OLS_B1Q2B6	BCMa.chrX	30.588	85	52	3	297	381	17488673	17488440	0.97	36.2
Cannabis_sativa_OLS_B1Q2B6	BCMa.chr1	56.757	333	139	3	54	383	49080889	49079897	4.62e-119	384
Cannabis_sativa_OLS_B1Q2B6	BCMa.chr1	50	44	22	0	10	53	49081284	49081153	4.55e-05	50.1
Cannabis_sativa_OLS_B1Q2B6	BCMa.chr1	23.077	247	146	9	155	368	14649459	14648752	0.016	42
Cannabis_sativa_OLS_B1Q2B6	BCMa.chr1	21.012	257	163	8	143	368	23557653	23558396	0.031	40.8
Cannabis_sativa_OLS_B1Q2B6	BCMa.chr1	26.606	109	74	3	258	360	52634522	52634196	1.8	35.4
Cannabis_sativa_OLS_B1Q2B6	BCMa.chr5	35.766	411	218	5	8	381	28537654	28538859	2.92e-75	258
Cannabis_sativa_OLS_B1Q2B6	BCMa.chr5	61.538	26	10	0	5	30	8424977	8424900	0.23	38.1
Cannabis_sativa_OLS_B1Q2B6	BCMa.chr6	20.301	266	167	7	141	368	59813036	59813812	0.001	45.8
Cannabis_sativa_OLS_B1Q2B6	BCMa.chr6	33.333	72	43	2	297	368	59860925	59861125	0.02	41.6
Cannabis_sativa_OLS_B1Q2B6	BCMa.chr6	33.333	72	43	2	297	368	34766902	34766702	0.071	39.7
Cannabis_sativa_OLS_B1Q2B6	BCMa.chr6	30.588	85	52	3	297	381	35499265	35499032	0.077	39.7
Cannabis_sativa_OLS_B1Q2B6	BCMa.chr2	21.154	260	165	11	141	368	54809948	54810703	0.004	43.9
Cannabis_sativa_OLS_B1Q2B6	BCMa.chr2	30.435	69	43	2	297	360	72139732	72139938	4.8	33.9
Cannabis_sativa_OLS_B1Q2B6	BCMa.chr4	31.944	72	44	2	297	368	79348218	79348418	0.012	42.4
Cannabis_sativa_OLS_B1Q2B6	BCMa.chr4	32.727	55	32	2	5	57	33655996	33656151	0.56	37
Cannabis_sativa_PT4_A0A455ZJC3	BCMa.chrX	53.472	144	19	2	172	272	27743128	27742712	3.55e-50	113
Cannabis_sativa_PT4_A0A455ZJC3	BCMa.chrX	92.593	54	4	0	121	174	27743382	27743221	3.55e-50	108
Cannabis_sativa_PT4_A0A455ZJC3	BCMa.chrX	91.139	79	7	0	1	79	27750320	27750084	2.8e-38	151
Cannabis_sativa_PT4_A0A455ZJC3	BCMa.chrX	46.552	174	35	4	1	122	27698463	27698966	2.36e-32	133
Cannabis_sativa_PT4_A0A455ZJC3	BCMa.chrX	70.27	74	22	0	170	243	27699713	27699934	3.42e-32	95.5
Cannabis_sativa_PT4_A0A455ZJC3	BCMa.chrX	62.745	51	19	0	124	174	27699492	27699644	3.42e-32	66.2
Cannabis_sativa_PT4_A0A455ZJC3	BCMa.chrX	97.826	46	1	0	77	122	27749755	27749618	2.72e-21	100
Cannabis_sativa_PT4_A0A455ZJC3	BCMa.chrX	81.667	60	9	2	1	60	27704602	27704775	3.1e-20	97.4
Cannabis_sativa_PT4_A0A455ZJC3	BCMa.chrX	69.231	78	24	0	168	245	27709083	27709316	2.91e-18	91.7
Cannabis_sativa_PT4_A0A455ZJC3	BCMa.chrX	88.889	27	3	0	372	398	27734453	27734373	9.51e-17	52.4
Cannabis_sativa_PT4_A0A455ZJC3	BCMa.chrX	72.222	36	9	1	329	364	27734807	27734703	9.51e-17	47.4
Cannabis_sativa_PT4_A0A455ZJC3	BCMa.chrX	83.333	18	1	1	359	374	27734589	27734536	9.51e-17	29.3
Cannabis_sativa_PT4_A0A455ZJC3	BCMa.chrX	95.238	42	2	0	302	343	27735577	27735452	3.88e-15	82
Cannabis_sativa_PT4_A0A455ZJC3	BCMa.chrX	38.835	103	34	1	270	343	27710313	27710621	1.23e-14	80.5
Cannabis_sativa_PT4_A0A455ZJC3	BCMa.chrX	45.192	104	49	2	162	257	27855519	27855208	1.95e-13	76.6
Cannabis_sativa_PT4_A0A455ZJC3	BCMa.chrX	33.858	127	38	1	264	344	27701351	27701731	3.76e-12	72.8
Cannabis_sativa_PT4_A0A455ZJC3	BCMa.chrX	97.059	34	1	0	271	304	27735861	27735760	1.25e-11	70.9
Cannabis_sativa_PT4_A0A455ZJC3	BCMa.chrX	52.703	74	34	1	172	244	19004624	19004403	3.56e-11	69.7
Cannabis_sativa_PT4_A0A455ZJC3	BCMa.chrX	45.349	86	46	1	173	257	18955147	18954890	1.14e-09	64.7
Cannabis_sativa_PT4_A0A455ZJC3	BCMa.chrX	40.909	44	26	0	302	345	27854684	27854553	2.71e-09	47.4
Cannabis_sativa_PT4_A0A455ZJC3	BCMa.chrX	48.387	31	16	0	273	303	27854875	27854783	2.71e-09	36.6
Cannabis_sativa_PT4_A0A455ZJC3	BCMa.chrX	35.088	57	37	0	303	359	19003139	19002969	3.51e-09	44.3
Cannabis_sativa_PT4_A0A455ZJC3	BCMa.chrX	48.387	31	16	0	273	303	19003332	19003240	3.51e-09	39.3
Cannabis_sativa_PT4_A0A455ZJC3	BCMa.chrX	57.143	49	21	0	124	172	27708546	27708692	2.3e-08	60.8
Cannabis_sativa_PT4_A0A455ZJC3	BCMa.chrX	51.111	45	20	1	78	122	27705067	27705195	5.36e-05	50.1
Cannabis_sativa_PT4_A0A455ZJC3	BCMa.chrX	30.252	119	47	3	90	172	27856808	27856452	0.000364	47.4
Cannabis_sativa_PT4_A0A455ZJC3	BCMa.chrX	42.857	49	28	0	124	172	19005644	19005498	0.018	42
Cannabis_sativa_PT4_A0A455ZJC3	BCMa.chrX	56.757	37	16	0	331	367	27701974	27702084	0.037	37.4
Cannabis_sativa_PT4_A0A455ZJC3	BCMa.chrX	80	10	2	0	363	372	27702174	27702203	0.037	21.6
Cannabis_sativa_PT4_A0A455ZJC3	BCMa.chrX	40.385	52	31	0	121	172	18958711	18958556	0.15	38.9
Cannabis_sativa_PT4_A0A455ZJC3	BCMa.chrX	64	25	9	0	374	398	27711806	27711880	0.47	37.4
Cannabis_sativa_PT4_A0A455ZJC3	BCMa.chrX	60	25	10	0	374	398	27702359	27702433	0.84	36.6
Cannabis_sativa_PT4_A0A455ZJC3	BCMa.chrX	61.29	31	11	1	342	372	27711480	27711569	3	34.7
Cannabis_sativa_PT4_A0A455ZJC3	BCMa.807	54.054	74	33	1	172	244	227127	227348	1.48e-11	70.9
Cannabis_sativa_PT4_A0A455ZJC3	BCMa.807	36.842	133	52	3	172	272	158837	159235	1.05e-10	68.2
Cannabis_sativa_PT4_A0A455ZJC3	BCMa.807	45.349	86	46	1	173	257	305731	305988	1.14e-09	64.7
Cannabis_sativa_PT4_A0A455ZJC3	BCMa.807	40.476	42	25	0	303	344	228610	228735	1.43e-08	42.4
Cannabis_sativa_PT4_A0A455ZJC3	BCMa.807	48.387	31	16	0	273	303	228419	228511	1.43e-08	39.3
Cannabis_sativa_PT4_A0A455ZJC3	BCMa.807	42.857	42	24	0	303	344	159996	160121	1.31e-07	44.7
Cannabis_sativa_PT4_A0A455ZJC3	BCMa.807	40.625	32	19	0	272	303	159802	159897	1.31e-07	33.9
Cannabis_sativa_PT4_A0A455ZJC3	BCMa.807	42.857	49	28	0	124	172	226113	226259	3.9e-06	41.6
Cannabis_sativa_PT4_A0A455ZJC3	BCMa.807	34.483	29	19	0	91	119	225911	225997	3.9e-06	31.6
Cannabis_sativa_PT4_A0A455ZJC3	BCMa.807	31.481	54	37	0	291	344	306919	307080	0.003	44.3
Cannabis_sativa_PT4_A0A455ZJC3	BCMa.807	38.333	60	37	0	113	172	301566	301745	0.013	42.4
Cannabis_sativa_PT4_A0A455ZJC3	BCMa.807	60	35	12	2	139	172	157096	157197	2.1	35
Cannabis_sativa_PT4_A0A455ZJC3	BCMa.chr8	31.915	141	61	2	166	272	21730200	21730619	1.71e-07	57.8
Cannabis_sativa_PT4_A0A455ZJC3	BCMa.chr8	25.414	181	50	3	303	398	21731248	21731790	8.86e-06	52.4
Cannabis_sativa_PT4_A0A455ZJC3	BCMa.chr8	39.583	48	29	0	125	172	21729569	21729712	0.011	42.4
Cannabis_sativa_PT4_A0A455ZJC3	BCMa.chr8	46.667	30	16	0	274	303	21730941	21731030	6	33.5
Cannabis_sativa_PT4_A0A455ZJC3	BCMa.chr6	30.159	63	43	1	112	173	2531032	2531220	0.12	39.3
Cannabis_sativa_PT4_A0A455ZJC3	BCMa.chr6	31.111	90	32	2	131	190	2463734	2464003	0.54	37
Cannabis_sativa_AAE1_H9A1V3	BCMb.chr3	95.556	90	3	1	131	219	45751963	45751694	3.63e-99	178
Cannabis_sativa_AAE1_H9A1V3	BCMb.chr3	95.775	71	3	0	218	288	45751580	45751368	3.63e-99	137
Cannabis_sativa_AAE1_H9A1V3	BCMb.chr3	89.796	49	5	0	88	136	45752180	45752034	3.63e-99	92.8
Cannabis_sativa_AAE1_H9A1V3	BCMb.chr3	98.851	87	1	0	1	87	45754577	45754317	9.38e-47	184
Cannabis_sativa_AAE1_H9A1V3	BCMb.chr3	53.977	176	38	5	88	223	45789994	45789476	8.53e-41	166
Cannabis_sativa_AAE1_H9A1V3	BCMb.chr3	91.139	79	7	0	469	547	45747145	45746909	2.19e-40	120
Cannabis_sativa_AAE1_H9A1V3	BCMb.chr3	89.474	38	4	0	434	471	45747366	45747253	2.19e-40	69.3
Cannabis_sativa_AAE1_H9A1V3	BCMb.chr3	100	74	0	0	366	439	45747840	45747619	1.32e-37	156
Cannabis_sativa_AAE1_H9A1V3	BCMb.chr3	90.476	84	3	2	531	613	45746786	45746547	3.95e-37	154
Cannabis_sativa_AAE1_H9A1V3	BCMb.chr3	78.824	85	18	0	355	439	45786474	45786220	1.29e-33	143
Cannabis_sativa_AAE1_H9A1V3	BCMb.chr3	93.243	74	1	1	626	699	45745805	45745596	1.89e-31	136
Cannabis_sativa_AAE1_H9A1V3	BCMb.chr3	73.171	82	22	0	5	86	45791045	45790800	5.84e-31	135
Cannabis_sativa_AAE1_H9A1V3	BCMb.chr3	85.714	70	10	0	544	613	45784668	45784459	3.69e-30	132
Cannabis_sativa_AAE1_H9A1V3	BCMb.chr3	82.353	68	12	0	218	285	45788513	45788310	2.85e-23	110
Cannabis_sativa_AAE1_H9A1V3	BCMb.chr3	73.846	65	17	0	626	690	45780196	45780002	1.18e-21	105
Cannabis_sativa_AAE1_H9A1V3	BCMb.chr3	70.667	75	22	0	469	543	45785122	45784898	1.85e-18	95.1
Cannabis_sativa_AAE1_H9A1V3	BCMb.chr3	91.837	49	4	0	293	341	45748979	45748833	6.66e-18	93.6
Cannabis_sativa_AAE1_H9A1V3	BCMb.chr3	62.791	43	16	0	299	341	45787807	45787679	3.47e-10	62.8
Cannabis_sativa_AAE1_H9A1V3	BCMb.chr3	66.667	15	5	0	284	298	45787965	45787921	3.47e-10	25.4
Cannabis_sativa_AAE1_H9A1V3	BCMb.chr3	90.625	32	3	0	440	471	45785372	45785277	1.38e-09	66.2
Cannabis_sativa_AAE1_H9A1V3	BCMb.chr3	100	31	0	0	690	720	45745436	45745344	1.81e-09	65.9
Cannabis_sativa_AAE1_H9A1V3	BCMb.chr3	63.043	46	6	1	332	366	45748435	45748298	8.07e-07	57.4
Cannabis_sativa_AAE1_H9A1V3	BCMb.chr3	75	32	8	0	689	720	45779826	45779731	1.38e-06	56.6
Cannabis_sativa_AAE1_H9A1V3	BCMb.chr3	43.548	62	34	1	332	393	45786854	45786672	3.99e-05	51.6
Cannabis_sativa_AAE1_H9A1V3	BCMb.chr3	21.695	295	194	11	188	471	17235644	17236450	0.014	43.5
Cannabis_sativa_AAE1_H9A1V3	BCMb.chr9	61.429	70	26	1	219	288	37515136	37514930	5.78e-42	81.3
Cannabis_sativa_AAE1_H9A1V3	BCMb.chr9	47.727	88	42	4	131	216	37515480	37515223	5.78e-42	79.3
Cannabis_sativa_AAE1_H9A1V3	BCMb.chr9	63.415	41	15	0	91	131	37515685	37515563	5.78e-42	55.5
Cannabis_sativa_AAE1_H9A1V3	BCMb.chr9	50.962	104	49	1	357	458	37354190	37353879	3.22e-25	117
Cannabis_sativa_AAE1_H9A1V3	BCMb.chr9	44	125	41	1	344	439	37513543	37513169	1.22e-24	115
Cannabis_sativa_AAE1_H9A1V3	BCMb.chr9	33.628	226	74	2	437	586	37512196	37511519	1.88e-23	111
Cannabis_sativa_AAE1_H9A1V3	BCMb.chr9	42.424	99	51	3	132	228	37356458	37356174	5.5e-23	78.6
Cannabis_sativa_AAE1_H9A1V3	BCMb.chr9	51.064	47	23	0	91	137	37356697	37356557	5.5e-23	53.1
Cannabis_sativa_AAE1_H9A1V3	BCMb.chr9	36.816	201	62	3	581	718	37511318	37510722	2.01e-20	101
Cannabis_sativa_AAE1_H9A1V3	BCMb.chr9	67.143	70	22	1	219	288	37355980	37355774	5.81e-16	87
Cannabis_sativa_AAE1_H9A1V3	BCMb.chr9	46.316	95	47	1	451	545	37353236	37352964	2.31e-10	68.9
Cannabis_sativa_AAE1_H9A1V3	BCMb.chr9	47.887	71	34	2	626	696	37352204	37352001	3.68e-10	68.2
Cannabis_sativa_AAE1_H9A1V3	BCMb.chr9	43.137	51	27	1	423	471	37353418	37353266	0.000159	49.7
Cannabis_sativa_AAE1_H9A1V3	BCMb.chr9	48.837	43	22	0	544	586	37352800	37352672	0.000348	48.5
Cannabis_sativa_AAE1_H9A1V3	BCMb.chr9	47.059	51	23	1	299	345	37514160	37514008	0.002	45.8
Cannabis_sativa_AAE1_H9A1V3	BCMb.chr9	55.882	34	15	0	580	613	37352445	37352344	0.018	43.1
Cannabis_sativa_AAE1_H9A1V3	BCMb.chr9	55.556	36	16	0	299	334	37354945	37354838	0.022	42.7
Cannabis_sativa_AAE1_H9A1V3	BCMb.chr9	50	30	13	1	689	718	37351857	37351774	8.6	34.3
Cannabis_sativa_AAE1_H9A1V3	BCMb.chr5	25.279	269	160	10	219	471	2778168	2777437	1.38e-06	56.6
Cannabis_sativa_AAE1_H9A1V3	BCMb.chr5	21.362	323	216	8	170	475	46178581	46179486	0.25	39.3
Cannabis_sativa_AAE1_H9A1V3	BCMb.chr8	22.989	261	177	7	223	477	37646223	37646951	3.46e-05	52
Cannabis_sativa_AAE1_H9A1V3	BCMb.chr8	36.538	52	32	1	165	216	6078506	6078354	0.21	32
Cannabis_sativa_AAE1_H9A1V3	BCMb.chr8	24.762	105	49	1	223	297	6078235	6077921	0.21	25
Cannabis_sativa_AAE1_H9A1V3	BCMb.chr6	23.774	265	181	8	219	477	73316261	73317010	0.014	43.5
Cannabis_sativa_AAE1_H9A1V3	BCMb.chr6	30.709	127	74	6	360	477	73338115	73338480	0.32	38.9
Cannabis_sativa_AAE1_H9A1V3	BCMb.chrY	21.154	208	145	5	247	453	256870	257439	2.1	36.2
Cannabis_sativa_AAE1_H9A1V3	BCMb.chr4	20	195	128	4	206	399	8188612	8189115	5.5	35
Cannabis_sativa_GPPS_large_subunit_A0A1V0QSH4	BCMb.chr4	97.964	393	8	0	1	393	73524016	73525194	0	764
Cannabis_sativa_GPPS_large_subunit_A0A1V0QSH4	BCMb.chrY	41.15	226	113	6	173	391	5343208	5342570	6.07e-37	147
Cannabis_sativa_GPPS_large_subunit_A0A1V0QSH4	BCMb.chrY	40.26	77	45	1	100	175	5343767	5343537	4.83e-12	72.4
Cannabis_sativa_GPPS_large_subunit_A0A1V0QSH4	BCMb.chr6	30.493	223	144	3	101	314	36704277	36703615	5.31e-20	96.7
Cannabis_sativa_GPPS_large_subunit_A0A1V0QSH4	BCMb.chr9	27.727	220	145	4	104	314	64815150	64814506	2.73e-17	88.6
Cannabis_sativa_GPPS_large_subunit_A0A1V0QSH4	BCMb.chr1	37.624	101	63	0	265	365	53298472	53298170	1.38e-10	67.8
Cannabis_sativa_GPPS_large_subunit_A0A1V0QSH4	BCMb.chr1	60.714	28	9	1	167	194	53299206	53299129	2.8	34.7
Cannabis_sativa_GPPS_small_subunit_A0A1V0QSG9	BCMb.chr6	96.541	318	11	0	9	326	36704415	36703462	0	595
Cannabis_sativa_GPPS_small_subunit_A0A1V0QSG9	BCMb.chr9	53.333	300	122	6	33	324	64815240	64814371	1.52e-82	276
Cannabis_sativa_GPPS_small_subunit_A0A1V0QSG9	BCMb.chr4	31.364	220	140	3	58	275	73524325	73524957	7.13e-23	103
Cannabis_sativa_GPPS_small_subunit_A0A1V0QSG9	BCMb.chrY	26.606	218	128	4	127	323	5343208	5342588	1.18e-06	54.7
Cannabis_sativa_GPPS_small_subunit_A0A1V0QSG9	BCMb.chrY	28.571	98	60	3	36	129	5343812	5343537	0.003	43.9
Cannabis_sativa_OAC_I6WU39	BCMb.chr9	98.305	59	1	0	43	101	61726871	61727047	1.47e-47	123
Cannabis_sativa_OAC_I6WU39	BCMb.chr9	100	42	0	0	1	42	61726645	61726770	1.47e-47	86.7
Cannabis_sativa_OAC_I6WU39	BCMb.chr9	94.915	59	3	0	43	101	61731798	61731974	1.06e-46	120
Cannabis_sativa_OAC_I6WU39	BCMb.chr9	97.619	42	1	0	1	42	61731578	61731703	1.06e-46	85.9
Cannabis_sativa_OAC_I6WU39	BCMb.chr9	37.778	135	46	1	3	99	61716611	61717015	1.13e-21	91.7
Cannabis_sativa_OAC_I6WU39	BCMb.chr9	34.559	136	48	2	3	97	60740627	60741034	6.52e-18	80.9
Cannabis_sativa_OAC_I6WU39	BCMb.chr9	47.541	61	31	1	40	99	60735981	60736163	4.64e-15	57.4
Cannabis_sativa_OAC_I6WU39	BCMb.chr9	45	40	22	0	3	42	60735764	60735883	4.64e-15	42.7
Cannabis_sativa_OAC_I6WU39	BCMb.chr9	48.333	60	31	0	40	99	61751788	61751967	1.33e-13	68.6
Cannabis_sativa_OAC_I6WU39	BCMb.chr9	42.5	40	23	0	3	42	61751519	61751638	2.53e-05	45.1
Cannabis_sativa_OAC_I6WU39	BCMb.chr2	29.31	58	40	1	41	97	76486654	76486481	0.85	32.3
Cannabis_sativa_OAC_I6WU39	BCMb.chr1	19.802	101	73	2	1	97	36038624	36038914	1.7	31.2
Cannabis_sativa_OLS_B1Q2B6	BCMb.chr8	82.955	440	20	3	1	385	5958772	5960091	0	723
Cannabis_sativa_OLS_B1Q2B6	BCMb.chr8	82.955	440	20	3	1	385	5974609	5973290	0	723
Cannabis_sativa_OLS_B1Q2B6	BCMb.chr8	73.193	332	88	1	54	384	5946655	5945660	5.62e-160	501
Cannabis_sativa_OLS_B1Q2B6	BCMb.chr8	46.875	96	43	1	251	346	5224362	5224625	5.45e-28	82.4
Cannabis_sativa_OLS_B1Q2B6	BCMb.chr8	79.487	39	8	0	343	381	5224615	5224731	5.45e-28	65.1
Cannabis_sativa_OLS_B1Q2B6	BCMb.chr8	65.306	49	17	0	5	53	5948877	5948731	2.44e-14	79.3
Cannabis_sativa_OLS_B1Q2B6	BCMb.chr8	23.276	232	136	9	155	368	18696403	18697026	0.16	38.5
Cannabis_sativa_OLS_B1Q2B6	BCMb.chrY	63.143	350	129	0	32	381	26647006	26648055	1.78e-151	477
Cannabis_sativa_OLS_B1Q2B6	BCMb.chrY	53.177	299	135	3	85	380	44707355	44708245	4.65e-96	318
Cannabis_sativa_OLS_B1Q2B6	BCMb.chrY	34.593	344	206	3	56	381	12136561	12137589	4.88e-64	225
Cannabis_sativa_OLS_B1Q2B6	BCMb.chrY	63.265	49	18	0	5	53	26646182	26646328	1.04e-13	77.4
Cannabis_sativa_OLS_B1Q2B6	BCMb.chrY	50	40	20	0	10	49	44704660	44704779	0.003	44.3
Cannabis_sativa_OLS_B1Q2B6	BCMb.chrY	30.588	85	52	3	297	381	17788642	17788409	0.97	36.2
Cannabis_sativa_OLS_B1Q2B6	BCMb.chr9	68.373	332	104	1	52	383	63548673	63549665	5.19e-149	470
Cannabis_sativa_OLS_B1Q2B6	BCMb.chr9	61.658	193	69	1	30	217	52450436	52449858	1.43e-69	241
Cannabis_sativa_OLS_B1Q2B6	BCMb.chr9	70	60	18	0	325	384	52449856	52449677	1.5e-18	92
Cannabis_sativa_OLS_B1Q2B6	BCMb.chr9	64.815	54	19	0	5	58	63548026	63548187	1.57e-16	85.9
Cannabis_sativa_OLS_B1Q2B6	BCMb.chr9	65.306	49	17	0	5	53	52450593	52450447	1.21e-14	80.1
Cannabis_sativa_OLS_B1Q2B6	BCMb.chr9	34.722	72	42	2	297	368	51774429	51774629	0.071	39.7
Cannabis_sativa_OLS_B1Q2B6	BCMb.chr1	56.757	333	139	3	54	383	16049787	16050779	4.63e-119	384
Cannabis_sativa_OLS_B1Q2B6	BCMb.chr1	50	44	22	0	10	53	16049392	16049523	4.57e-05	50.1
Cannabis_sativa_OLS_B1Q2B6	BCMb.chr1	23.077	247	146	9	155	368	48681276	48681983	0.016	42
Cannabis_sativa_OLS_B1Q2B6	BCMb.chr1	21.012	257	163	8	143	368	39992939	39992196	0.031	40.8
Cannabis_sativa_OLS_B1Q2B6	BCMb.chr1	26.606	109	74	3	258	360	12714800	12715126	1.8	35.4
Cannabis_sativa_OLS_B1Q2B6	BCMb.chr5	35.766	411	218	5	8	381	28558130	28559335	2.93e-75	258
Cannabis_sativa_OLS_B1Q2B6	BCMb.chr6	20.301	266	167	7	141	368	17315646	17314870	0.001	45.8
Cannabis_sativa_OLS_B1Q2B6	BCMb.chr6	33.333	72	43	2	297	368	17267759	17267559	0.02	41.6
Cannabis_sativa_OLS_B1Q2B6	BCMb.chr6	33.333	72	43	2	297	368	42335915	42336115	0.071	39.7
Cannabis_sativa_OLS_B1Q2B6	BCMb.chr6	30.588	85	52	3	297	381	41606173	41606406	0.077	39.7
Cannabis_sativa_OLS_B1Q2B6	BCMb.chr2	21.839	261	162	11	141	368	21309538	21308783	0.007	43.1
Cannabis_sativa_OLS_B1Q2B6	BCMb.chr2	32.143	56	37	1	297	351	3620927	3620760	5	33.9
Cannabis_sativa_OLS_B1Q2B6	BCMb.chr4	31.944	72	44	2	297	368	1916102	1915902	0.024	41.2
Cannabis_sativa_OLS_B1Q2B6	BCMb.chr4	32.727	55	32	2	5	57	46596526	46596371	0.56	37
Cannabis_sativa_PT4_A0A455ZJC3	BCMb.chrY	100	77	0	0	172	248	27089813	27089583	4.31e-63	123
Cannabis_sativa_PT4_A0A455ZJC3	BCMb.chrY	92.593	54	4	0	121	174	27090069	27089908	4.31e-63	108
Cannabis_sativa_PT4_A0A455ZJC3	BCMb.chrY	75	32	8	0	241	272	27089491	27089396	4.31e-63	53.9
Cannabis_sativa_PT4_A0A455ZJC3	BCMb.chrY	96.104	77	3	0	172	248	27227225	27227455	4.29e-52	119
Cannabis_sativa_PT4_A0A455ZJC3	BCMb.chrY	96.104	77	3	0	172	248	27307994	27308224	4.29e-52	119
Cannabis_sativa_PT4_A0A455ZJC3	BCMb.chrY	92.593	54	4	0	121	174	27226969	27227130	4.29e-52	108
Cannabis_sativa_PT4_A0A455ZJC3	BCMb.chrY	92.593	54	4	0	121	174	27307738	27307899	4.29e-52	108
Cannabis_sativa_PT4_A0A455ZJC3	BCMb.chrY	93.671	79	5	0	1	79	27399163	27399399	2.82e-40	157
Cannabis_sativa_PT4_A0A455ZJC3	BCMb.chrY	93.671	79	5	0	1	79	27224741	27224977	4.36e-40	156
Cannabis_sativa_PT4_A0A455ZJC3	BCMb.chrY	93.671	79	5	0	1	79	27305523	27305759	5.73e-40	155
Cannabis_sativa_PT4_A0A455ZJC3	BCMb.chrY	91.139	79	7	0	1	79	27371290	27371526	8.7e-39	152
Cannabis_sativa_PT4_A0A455ZJC3	BCMb.chrY	54.73	148	39	1	124	243	27046710	27047153	1.29e-33	137
Cannabis_sativa_PT4_A0A455ZJC3	BCMb.chrY	47.126	174	34	4	1	122	27044803	27045306	6.54e-33	135
Cannabis_sativa_PT4_A0A455ZJC3	BCMb.chrY	81.667	60	10	1	1	60	27051873	27052049	1.09e-21	102
Cannabis_sativa_PT4_A0A455ZJC3	BCMb.chrY	97.826	46	1	0	77	122	27399729	27399866	2.73e-21	100
Cannabis_sativa_PT4_A0A455ZJC3	BCMb.chrY	89.13	46	5	0	77	122	27225291	27225428	1.55e-19	95.5
Cannabis_sativa_PT4_A0A455ZJC3	BCMb.chrY	89.13	46	5	0	77	122	27306059	27306196	1.55e-19	95.5
Cannabis_sativa_PT4_A0A455ZJC3	BCMb.chrY	69.231	78	24	0	168	245	27056316	27056549	5.66e-18	90.5
Cannabis_sativa_PT4_A0A455ZJC3	BCMb.chrY	88.889	27	3	0	372	398	27081639	27081559	2.51e-17	52.4
Cannabis_sativa_PT4_A0A455ZJC3	BCMb.chrY	72.222	36	9	1	329	364	27081998	27081894	2.51e-17	49.3
Cannabis_sativa_PT4_A0A455ZJC3	BCMb.chrY	83.333	18	1	1	359	374	27081778	27081725	2.51e-17	29.3
Cannabis_sativa_PT4_A0A455ZJC3	BCMb.chrY	95.238	42	2	0	302	343	27082756	27082631	3.89e-15	82
Cannabis_sativa_PT4_A0A455ZJC3	BCMb.chrY	53.659	41	19	0	303	343	27057773	27057895	5.59e-15	53.5
Cannabis_sativa_PT4_A0A455ZJC3	BCMb.chrY	50	40	20	0	265	304	27057567	27057686	5.59e-15	49.7
Cannabis_sativa_PT4_A0A455ZJC3	BCMb.chrY	88.889	27	3	0	372	398	27253282	27253362	1.6e-14	52.4
Cannabis_sativa_PT4_A0A455ZJC3	BCMb.chrY	88.889	27	3	0	372	398	27317895	27317975	1.6e-14	52.4
Cannabis_sativa_PT4_A0A455ZJC3	BCMb.chrY	40.217	92	9	2	329	375	27252927	27253199	1.6e-14	49.7
Cannabis_sativa_PT4_A0A455ZJC3	BCMb.chrY	40.217	92	9	2	329	375	27317540	27317812	1.6e-14	49.7
Cannabis_sativa_PT4_A0A455ZJC3	BCMb.chrY	88.095	42	5	0	302	343	27252176	27252301	2.74e-13	76.3
Cannabis_sativa_PT4_A0A455ZJC3	BCMb.chrY	88.095	42	5	0	302	343	27316789	27316914	2.74e-13	76.3
Cannabis_sativa_PT4_A0A455ZJC3	BCMb.chrY	50	84	38	1	172	251	27148843	27149094	6.47e-12	72
Cannabis_sativa_PT4_A0A455ZJC3	BCMb.chrY	97.059	34	1	0	271	304	27083040	27082939	1.26e-11	70.9
Cannabis_sativa_PT4_A0A455ZJC3	BCMb.chrY	94.118	34	2	0	271	304	27251895	27251996	5.08e-11	68.9
Cannabis_sativa_PT4_A0A455ZJC3	BCMb.chrY	94.118	34	2	0	271	304	27316507	27316608	5.08e-11	68.9
Cannabis_sativa_PT4_A0A455ZJC3	BCMb.chrY	30.556	108	40	1	273	345	27149445	27149768	1.6e-08	61.2
Cannabis_sativa_PT4_A0A455ZJC3	BCMb.chrY	57.143	49	21	0	124	172	27055778	27055924	2.19e-08	60.8
Cannabis_sativa_PT4_A0A455ZJC3	BCMb.chrY	54.762	42	19	0	303	344	27048865	27048990	1.07e-06	55.5
Cannabis_sativa_PT4_A0A455ZJC3	BCMb.chrY	75	32	8	0	241	272	27241122	27241217	3.4e-06	53.9
Cannabis_sativa_PT4_A0A455ZJC3	BCMb.chrY	55.769	52	22	1	258	309	27249853	27250005	3.74e-06	53.5
Cannabis_sativa_PT4_A0A455ZJC3	BCMb.chrY	69.231	39	11	1	271	309	27246683	27246796	8.81e-06	52.4
Cannabis_sativa_PT4_A0A455ZJC3	BCMb.chrY	69.231	39	11	1	271	309	27314500	27314613	8.81e-06	52.4
Cannabis_sativa_PT4_A0A455ZJC3	BCMb.chrY	74.194	31	8	0	242	272	27308469	27308561	1.27e-05	52
Cannabis_sativa_PT4_A0A455ZJC3	BCMb.chrY	44.898	49	27	0	124	172	27147728	27147874	2.53e-05	42.7
Cannabis_sativa_PT4_A0A455ZJC3	BCMb.chrY	33.333	33	19	1	90	119	27147516	27147614	2.53e-05	27.3
Cannabis_sativa_PT4_A0A455ZJC3	BCMb.chrY	51.111	45	20	1	78	122	27052281	27052409	5.1e-05	50.1
Cannabis_sativa_PT4_A0A455ZJC3	BCMb.chrY	48.78	41	21	0	264	304	27048597	27048719	0.001	45.8
Cannabis_sativa_PT4_A0A455ZJC3	BCMb.chrY	61.29	31	12	0	342	372	27058659	27058751	0.17	38.5
Cannabis_sativa_PT4_A0A455ZJC3	BCMb.chrY	64	25	9	0	374	398	27049622	27049696	0.18	38.5
Cannabis_sativa_PT4_A0A455ZJC3	BCMb.chrY	64	25	9	0	374	398	27058988	27059062	0.47	37.4
Cannabis_sativa_PT4_A0A455ZJC3	BCMb.chrY	56.757	37	16	0	331	367	27049235	27049345	0.49	37.4
Cannabis_sativa_PT4_A0A455ZJC3	BCMb.chr8	31.915	141	61	2	166	272	32824243	32823824	1.56e-07	58.2
Cannabis_sativa_PT4_A0A455ZJC3	BCMb.chr8	25.414	181	50	3	303	398	32823195	32822653	6.18e-06	52.8
Cannabis_sativa_PT4_A0A455ZJC3	BCMb.chr8	39.583	48	29	0	125	172	32824874	32824731	0.011	42.4
Cannabis_sativa_PT4_A0A455ZJC3	BCMb.chr8	25.862	116	47	3	126	204	32852184	32851843	4.4	34.3
Cannabis_sativa_PT4_A0A455ZJC3	BCMb.chr8	46.667	30	16	0	274	303	32823502	32823413	6	33.5
Cannabis_sativa_AAE1_H9A1V3	BOAXa.chr3	94.505	91	4	1	131	220	35279939	35280211	2.52e-98	177
Cannabis_sativa_AAE1_H9A1V3	BOAXa.chr3	100	68	0	0	218	285	35280322	35280525	2.52e-98	136
Cannabis_sativa_AAE1_H9A1V3	BOAXa.chr3	97.727	44	1	0	88	131	35279719	35279850	2.52e-98	91.3
Cannabis_sativa_AAE1_H9A1V3	BOAXa.chr3	98.851	87	1	0	1	87	35277311	35277571	9.56e-47	184
Cannabis_sativa_AAE1_H9A1V3	BOAXa.chr3	54.802	177	36	5	88	223	35226245	35226766	2.42e-42	171
Cannabis_sativa_AAE1_H9A1V3	BOAXa.chr3	69.231	156	11	1	429	547	35284149	35284616	3.03e-42	170
Cannabis_sativa_AAE1_H9A1V3	BOAXa.chr3	100	74	0	0	366	439	35283700	35283921	1.35e-37	156
Cannabis_sativa_AAE1_H9A1V3	BOAXa.chr3	90.476	84	3	2	531	613	35284739	35284978	4.03e-37	154
Cannabis_sativa_AAE1_H9A1V3	BOAXa.chr3	78.824	85	18	0	355	439	35229769	35230023	1.37e-33	143
Cannabis_sativa_AAE1_H9A1V3	BOAXa.chr3	93.243	74	1	1	626	699	35285698	35285907	1.92e-31	136
Cannabis_sativa_AAE1_H9A1V3	BOAXa.chr3	71.951	82	23	0	5	86	35225192	35225437	2.01e-30	133
Cannabis_sativa_AAE1_H9A1V3	BOAXa.chr3	85.714	70	10	0	544	613	35231576	35231785	3.76e-30	132
Cannabis_sativa_AAE1_H9A1V3	BOAXa.chr3	82.353	68	12	0	218	285	35227729	35227932	2.9e-23	110
Cannabis_sativa_AAE1_H9A1V3	BOAXa.chr3	73.846	65	17	0	626	690	35236056	35236250	1.2e-21	105
Cannabis_sativa_AAE1_H9A1V3	BOAXa.chr3	65.854	82	28	0	469	550	35231122	35231367	9.05e-19	96.3
Cannabis_sativa_AAE1_H9A1V3	BOAXa.chr3	89.796	49	5	0	293	341	35282630	35282776	2.32e-17	91.7
Cannabis_sativa_AAE1_H9A1V3	BOAXa.chr3	62.791	43	16	0	299	341	35228436	35228564	3.54e-10	62.8
Cannabis_sativa_AAE1_H9A1V3	BOAXa.chr3	66.667	15	5	0	284	298	35228278	35228322	3.54e-10	25.4
Cannabis_sativa_AAE1_H9A1V3	BOAXa.chr3	90.625	32	3	0	440	471	35230872	35230967	1.41e-09	66.2
Cannabis_sativa_AAE1_H9A1V3	BOAXa.chr3	100	31	0	0	690	720	35286064	35286156	1.85e-09	65.9
Cannabis_sativa_AAE1_H9A1V3	BOAXa.chr3	96.154	26	1	0	341	366	35283229	35283306	8.52e-07	57.4
Cannabis_sativa_AAE1_H9A1V3	BOAXa.chr3	75	32	8	0	689	720	35236426	35236521	1.4e-06	56.6
Cannabis_sativa_AAE1_H9A1V3	BOAXa.chr3	58.537	41	17	0	332	372	35229389	35229511	4.18e-05	51.6
Cannabis_sativa_AAE1_H9A1V3	BOAXa.chr3	21.695	295	194	11	188	471	64467777	64466971	0.016	43.1
Cannabis_sativa_AAE1_H9A1V3	BOAXa.chr9	61.429	70	26	1	219	288	28224402	28224608	5.89e-42	81.3
Cannabis_sativa_AAE1_H9A1V3	BOAXa.chr9	47.727	88	42	4	131	216	28224058	28224315	5.89e-42	79.3
Cannabis_sativa_AAE1_H9A1V3	BOAXa.chr9	63.415	41	15	0	91	131	28223853	28223975	5.89e-42	55.5
Cannabis_sativa_AAE1_H9A1V3	BOAXa.chr9	50.962	104	49	1	357	458	28325430	28325741	3.28e-25	117
Cannabis_sativa_AAE1_H9A1V3	BOAXa.chr9	44	125	41	1	344	439	28225992	28226366	2.12e-24	114
Cannabis_sativa_AAE1_H9A1V3	BOAXa.chr9	33.778	225	73	2	438	586	28227401	28228075	1.16e-23	112
Cannabis_sativa_AAE1_H9A1V3	BOAXa.chr9	42.424	99	51	3	132	228	28323164	28323448	5.61e-23	78.6
Cannabis_sativa_AAE1_H9A1V3	BOAXa.chr9	51.064	47	23	0	91	137	28322925	28323065	5.61e-23	53.1
Cannabis_sativa_AAE1_H9A1V3	BOAXa.chr9	35.115	131	45	2	626	718	28228488	28228874	5e-20	79.3
Cannabis_sativa_AAE1_H9A1V3	BOAXa.chr9	59.375	32	13	0	582	613	28228279	28228374	5e-20	42.4
Cannabis_sativa_AAE1_H9A1V3	BOAXa.chr9	67.143	70	22	1	219	288	28323642	28323848	5.92e-16	87
Cannabis_sativa_AAE1_H9A1V3	BOAXa.chr9	46.316	95	47	1	451	545	28326384	28326656	2.35e-10	68.9
Cannabis_sativa_AAE1_H9A1V3	BOAXa.chr9	47.887	71	34	2	626	696	28327416	28327619	3.75e-10	68.2
Cannabis_sativa_AAE1_H9A1V3	BOAXa.chr9	43.137	51	27	1	423	471	28326202	28326354	0.000162	49.7
Cannabis_sativa_AAE1_H9A1V3	BOAXa.chr9	48.837	43	22	0	544	586	28326820	28326948	0.000355	48.5
Cannabis_sativa_AAE1_H9A1V3	BOAXa.chr9	47.059	51	23	1	299	345	28225375	28225527	0.002	45.8
Cannabis_sativa_AAE1_H9A1V3	BOAXa.chr9	55.882	34	15	0	580	613	28327175	28327276	0.018	43.1
Cannabis_sativa_AAE1_H9A1V3	BOAXa.chr9	55.556	36	16	0	299	334	28324677	28324784	0.023	42.7
Cannabis_sativa_AAE1_H9A1V3	BOAXa.chr9	50	30	13	1	689	718	28327763	28327846	8.8	34.3
Cannabis_sativa_AAE1_H9A1V3	BOAXa.chr5	24.907	269	161	10	219	471	74276152	74276883	2.41e-06	55.8
Cannabis_sativa_AAE1_H9A1V3	BOAXa.chr5	21.362	323	216	8	170	475	29718454	29717549	0.26	39.3
Cannabis_sativa_AAE1_H9A1V3	BOAXa.chr8	22.989	261	177	7	223	477	17215364	17214636	4.66e-05	51.6
Cannabis_sativa_AAE1_H9A1V3	BOAXa.chr8	23.569	297	188	10	199	485	50356451	50355648	0.005	45.1
Cannabis_sativa_AAE1_H9A1V3	BOAXa.chr8	36.538	52	32	1	165	216	49010261	49010413	0.18	32
Cannabis_sativa_AAE1_H9A1V3	BOAXa.chr8	25	104	49	1	223	297	49010532	49010843	0.18	25.4
Cannabis_sativa_AAE1_H9A1V3	BOAXa.chr6	23.774	265	181	8	219	477	74963263	74964012	0.026	42.4
Cannabis_sativa_AAE1_H9A1V3	BOAXa.chr6	30.709	127	74	6	360	477	74978316	74978681	0.24	39.3
Cannabis_sativa_AAE1_H9A1V3	BOAXa.chrX	21.154	208	145	5	247	453	83029881	83029312	1.3	37
Cannabis_sativa_AAE1_H9A1V3	BOAXa.chrX	20.701	314	226	7	174	477	17516323	17515421	2.8	35.8
Cannabis_sativa_GPPS_large_subunit_A0A1V0QSH4	BOAXa.chr4	97.964	393	8	0	1	393	4965796	4964618	0	764
Cannabis_sativa_GPPS_large_subunit_A0A1V0QSH4	BOAXa.chrX	41.15	226	113	6	173	391	77908878	77909516	7.62e-37	146
Cannabis_sativa_GPPS_large_subunit_A0A1V0QSH4	BOAXa.chrX	40.26	77	45	1	100	175	77908350	77908580	1.16e-11	70.9
Cannabis_sativa_GPPS_large_subunit_A0A1V0QSH4	BOAXa.chr6	30.942	223	143	3	101	314	35164871	35164209	2.76e-21	100
Cannabis_sativa_GPPS_large_subunit_A0A1V0QSH4	BOAXa.chr9	27.273	220	146	4	104	314	560153	560797	1.17e-16	86.7
Cannabis_sativa_GPPS_large_subunit_A0A1V0QSH4	BOAXa.chr1	37.624	101	63	0	265	365	9939600	9939902	1.41e-10	67.8
Cannabis_sativa_GPPS_large_subunit_A0A1V0QSH4	BOAXa.chr1	60.714	28	9	1	167	194	9938866	9938943	2.9	34.7
Cannabis_sativa_GPPS_small_subunit_A0A1V0QSG9	BOAXa.chr6	98.119	319	5	1	9	326	35165012	35164056	0	605
Cannabis_sativa_GPPS_small_subunit_A0A1V0QSG9	BOAXa.chr9	55.709	289	110	6	44	324	560096	560932	4.98e-83	278
Cannabis_sativa_GPPS_small_subunit_A0A1V0QSG9	BOAXa.chr4	31.364	220	140	3	58	275	4965487	4964855	7.27e-23	103
Cannabis_sativa_GPPS_small_subunit_A0A1V0QSG9	BOAXa.chrX	26.606	218	128	4	127	323	77908878	77909498	1.17e-06	54.7
Cannabis_sativa_GPPS_small_subunit_A0A1V0QSG9	BOAXa.chrX	27.551	98	61	3	36	129	77908305	77908580	0.013	41.6
Cannabis_sativa_GPPS_small_subunit_A0A1V0QSG9	BOAXa.chr2	31.183	93	51	4	44	127	28464163	28464429	8.9	32.7
Cannabis_sativa_OAC_I6WU39	BOAXa.chr9	72.059	136	3	1	1	101	3849336	3848929	1.93e-54	185
Cannabis_sativa_OAC_I6WU39	BOAXa.chr9	100	59	0	0	43	101	3834595	3834419	7.5e-48	124
Cannabis_sativa_OAC_I6WU39	BOAXa.chr9	97.619	42	1	0	1	42	3834815	3834690	7.5e-48	85.9
Cannabis_sativa_OAC_I6WU39	BOAXa.chr9	39.516	124	46	3	3	97	4659193	4658822	8.03e-20	86.3
Cannabis_sativa_OAC_I6WU39	BOAXa.chr9	47.541	61	31	1	40	99	4663680	4663498	4.73e-15	57.4
Cannabis_sativa_OAC_I6WU39	BOAXa.chr9	45	40	22	0	3	42	4663897	4663778	4.73e-15	42.7
Cannabis_sativa_OAC_I6WU39	BOAXa.chr9	48.333	60	31	0	40	99	3811414	3811235	1.36e-13	68.6
Cannabis_sativa_OAC_I6WU39	BOAXa.chr9	42.5	40	23	0	3	42	3811682	3811563	2.37e-05	45.1
Cannabis_sativa_OAC_I6WU39	BOAXa.chr2	29.31	58	40	1	41	97	1926009	1926182	0.26	33.9
Cannabis_sativa_OAC_I6WU39	BOAXa.chr5	23.75	80	56	2	12	90	33464141	33463914	0.85	32.3
Cannabis_sativa_OLS_B1Q2B6	BOAXa.chr8	94.362	337	19	0	49	385	49160537	49159527	0	662
Cannabis_sativa_OLS_B1Q2B6	BOAXa.chr8	94.611	334	18	0	52	385	49172100	49171099	0	657
Cannabis_sativa_OLS_B1Q2B6	BOAXa.chr8	94.611	334	18	0	52	385	49166622	49165621	0	657
Cannabis_sativa_OLS_B1Q2B6	BOAXa.chr8	80.12	332	64	1	54	383	49144901	49145896	0	564
Cannabis_sativa_OLS_B1Q2B6	BOAXa.chr8	73.494	332	87	1	54	384	49200028	49201023	1.05e-160	503
Cannabis_sativa_OLS_B1Q2B6	BOAXa.chr8	72	100	26	1	284	381	49938718	49938419	2.74e-34	139
Cannabis_sativa_OLS_B1Q2B6	BOAXa.chr8	94.34	53	3	0	1	53	49172491	49172333	7.29e-26	114
Cannabis_sativa_OLS_B1Q2B6	BOAXa.chr8	94.34	53	3	0	1	53	49167007	49166849	8.54e-26	114
Cannabis_sativa_OLS_B1Q2B6	BOAXa.chr8	94	50	3	0	4	53	49160776	49160627	4.87e-23	105
Cannabis_sativa_OLS_B1Q2B6	BOAXa.chr8	89.796	49	5	0	5	53	49144000	49144146	1.94e-21	100
Cannabis_sativa_OLS_B1Q2B6	BOAXa.chr8	65.306	49	17	0	5	53	49197865	49198011	3.59e-14	78.6
Cannabis_sativa_OLS_B1Q2B6	BOAXa.chr8	23.276	232	136	9	155	368	36190641	36190018	0.16	38.5
Cannabis_sativa_OLS_B1Q2B6	BOAXa.chr8	28.571	63	42	1	302	361	50104585	50104773	9.8	33.1
Cannabis_sativa_OLS_B1Q2B6	BOAXa.chr9	69.697	330	100	0	54	383	13190323	13191312	1.23e-154	486
Cannabis_sativa_OLS_B1Q2B6	BOAXa.chr9	68.06	335	106	1	49	383	1931039	1930038	4.45e-149	470
Cannabis_sativa_OLS_B1Q2B6	BOAXa.chr9	64.815	54	19	0	5	58	1931672	1931511	1.6e-16	85.9
Cannabis_sativa_OLS_B1Q2B6	BOAXa.chr9	63.265	49	18	0	5	53	13190079	13190225	5.47e-14	78.2
Cannabis_sativa_OLS_B1Q2B6	BOAXa.chr9	34.722	72	42	2	297	368	13763186	13762986	0.073	39.7
Cannabis_sativa_OLS_B1Q2B6	BOAXa.chrX	62.571	350	131	0	32	381	55500041	55498992	1.47e-150	474
Cannabis_sativa_OLS_B1Q2B6	BOAXa.chrX	34.593	344	206	3	56	381	71158617	71157589	4.98e-64	225
Cannabis_sativa_OLS_B1Q2B6	BOAXa.chrX	63.265	49	18	0	5	53	55500867	55500721	1.06e-13	77.4
Cannabis_sativa_OLS_B1Q2B6	BOAXa.chrX	21.633	245	152	10	155	368	3023714	3023007	0.000766	46.2
Cannabis_sativa_OLS_B1Q2B6	BOAXa.chrX	23.887	247	144	10	155	368	876411	877118	0.004	43.9
Cannabis_sativa_OLS_B1Q2B6	BOAXa.chrX	30.588	85	52	3	297	381	64698471	64698238	0.99	36.2
Cannabis_sativa_OLS_B1Q2B6	BOAXa.chr1	56.456	333	140	3	54	383	64200397	64201389	1.14e-119	385
Cannabis_sativa_OLS_B1Q2B6	BOAXa.chr1	52.273	44	21	0	10	53	64199981	64200112	9.12e-06	52.4
Cannabis_sativa_OLS_B1Q2B6	BOAXa.chr1	23.077	247	146	9	155	368	14845792	14845085	0.016	42
Cannabis_sativa_OLS_B1Q2B6	BOAXa.chr1	21.012	257	163	8	143	368	23709810	23710553	0.032	40.8
Cannabis_sativa_OLS_B1Q2B6	BOAXa.chr1	26.606	109	74	3	258	360	61317386	61317712	0.73	36.6
Cannabis_sativa_OLS_B1Q2B6	BOAXa.chr5	36.01	411	217	5	8	381	49055227	49054022	9.62e-76	259
Cannabis_sativa_OLS_B1Q2B6	BOAXa.chr6	19.549	266	169	8	141	368	16741702	16740926	0.000346	47.4
Cannabis_sativa_OLS_B1Q2B6	BOAXa.chr6	33.333	72	43	2	297	368	16703016	16702816	0.02	41.6
Cannabis_sativa_OLS_B1Q2B6	BOAXa.chr6	30.588	85	52	3	297	381	40559880	40560113	0.079	39.7
Cannabis_sativa_OLS_B1Q2B6	BOAXa.chr6	33.333	72	43	2	297	368	41174024	41174224	0.079	39.7
Cannabis_sativa_OLS_B1Q2B6	BOAXa.chr2	21.154	260	165	11	141	368	58065753	58066508	0.004	43.9
Cannabis_sativa_OLS_B1Q2B6	BOAXa.chr2	32.143	56	37	1	297	351	75935369	75935536	4.7	33.9
Cannabis_sativa_OLS_B1Q2B6	BOAXa.chr4	31.944	72	44	2	297	368	76522898	76523098	0.014	42
Cannabis_sativa_PT4_A0A455ZJC3	BOAXa.chrX	100	77	0	0	172	248	55050477	55050707	1.67e-63	123
Cannabis_sativa_PT4_A0A455ZJC3	BOAXa.chrX	92.593	54	4	0	121	174	55050221	55050382	1.67e-63	108
Cannabis_sativa_PT4_A0A455ZJC3	BOAXa.chrX	78.125	32	7	0	241	272	55050799	55050894	1.67e-63	55.1
Cannabis_sativa_PT4_A0A455ZJC3	BOAXa.chrX	93.671	79	5	0	1	79	55043562	55043798	3.35e-40	156
Cannabis_sativa_PT4_A0A455ZJC3	BOAXa.chrX	45.977	174	36	4	1	122	55098755	55098252	2.43e-31	130
Cannabis_sativa_PT4_A0A455ZJC3	BOAXa.chrX	71.014	69	20	0	175	243	55096620	55096414	2.91e-30	89
Cannabis_sativa_PT4_A0A455ZJC3	BOAXa.chrX	62.745	51	19	0	124	174	55096856	55096704	2.91e-30	66.2
Cannabis_sativa_PT4_A0A455ZJC3	BOAXa.chrX	81.667	60	10	1	1	60	55091769	55091593	8.68e-22	102
Cannabis_sativa_PT4_A0A455ZJC3	BOAXa.chrX	97.826	46	1	0	77	122	55044153	55044290	2.78e-21	100
Cannabis_sativa_PT4_A0A455ZJC3	BOAXa.chrX	69.231	78	24	0	168	245	55086375	55086142	5.77e-18	90.5
Cannabis_sativa_PT4_A0A455ZJC3	BOAXa.chrX	88.889	27	3	0	372	398	55061059	55061139	2.58e-17	52.4
Cannabis_sativa_PT4_A0A455ZJC3	BOAXa.chrX	72.222	36	9	1	329	364	55060703	55060807	2.58e-17	49.3
Cannabis_sativa_PT4_A0A455ZJC3	BOAXa.chrX	83.333	18	1	1	359	374	55060923	55060976	2.58e-17	29.3
Cannabis_sativa_PT4_A0A455ZJC3	BOAXa.chrX	95.238	42	2	0	302	343	55059951	55060076	3.96e-15	82
Cannabis_sativa_PT4_A0A455ZJC3	BOAXa.chrX	53.659	41	19	0	303	343	55084915	55084793	6.91e-15	53.5
Cannabis_sativa_PT4_A0A455ZJC3	BOAXa.chrX	50	40	20	0	265	304	55085121	55085002	6.91e-15	49.7
Cannabis_sativa_PT4_A0A455ZJC3	BOAXa.chrX	45.192	104	49	2	162	257	54904221	54904532	1.48e-13	77
Cannabis_sativa_PT4_A0A455ZJC3	BOAXa.chrX	97.059	34	1	0	271	304	55059667	55059768	1.28e-11	70.9
Cannabis_sativa_PT4_A0A455ZJC3	BOAXa.chrX	54.054	74	33	1	172	244	63371043	63371264	3.19e-11	69.7
Cannabis_sativa_PT4_A0A455ZJC3	BOAXa.chrX	40.909	44	26	0	302	345	54905229	54905360	4.98e-10	50.1
Cannabis_sativa_PT4_A0A455ZJC3	BOAXa.chrX	48.387	31	16	0	273	303	54905036	54905128	4.98e-10	36.6
Cannabis_sativa_PT4_A0A455ZJC3	BOAXa.chrX	40.476	42	25	0	303	344	63372521	63372646	1.04e-08	43.1
Cannabis_sativa_PT4_A0A455ZJC3	BOAXa.chrX	48.387	31	16	0	273	303	63372330	63372422	1.04e-08	38.9
Cannabis_sativa_PT4_A0A455ZJC3	BOAXa.chrX	59.184	49	20	0	124	172	55086919	55086773	2.08e-08	60.8
Cannabis_sativa_PT4_A0A455ZJC3	BOAXa.chrX	64.286	42	15	0	173	214	63419135	63419260	6.93e-08	59.3
Cannabis_sativa_PT4_A0A455ZJC3	BOAXa.chrX	54.762	42	19	0	303	344	55094740	55094615	1.35e-06	55.1
Cannabis_sativa_PT4_A0A455ZJC3	BOAXa.chrX	51.111	45	20	1	78	122	55091378	55091250	5.2e-05	50.1
Cannabis_sativa_PT4_A0A455ZJC3	BOAXa.chrX	30.252	119	47	3	90	172	54902629	54902985	0.000305	47.4
Cannabis_sativa_PT4_A0A455ZJC3	BOAXa.chrX	48.78	41	21	0	264	304	55094994	55094872	0.001	45.8
Cannabis_sativa_PT4_A0A455ZJC3	BOAXa.chrX	30.189	53	37	0	291	343	63422355	63422513	0.015	42
Cannabis_sativa_PT4_A0A455ZJC3	BOAXa.chrX	42.857	49	28	0	124	172	63410170	63410316	0.022	41.6
Cannabis_sativa_PT4_A0A455ZJC3	BOAXa.chrX	64	25	9	0	374	398	55094011	55093937	0.16	38.9
Cannabis_sativa_PT4_A0A455ZJC3	BOAXa.chrX	42.857	49	28	0	124	172	63370020	63370166	0.17	38.5
Cannabis_sativa_PT4_A0A455ZJC3	BOAXa.chrX	64	25	9	0	374	398	55083709	55083635	0.48	37.4
Cannabis_sativa_PT4_A0A455ZJC3	BOAXa.chrX	56.757	37	16	0	331	367	55094370	55094260	0.5	37.4
Cannabis_sativa_PT4_A0A455ZJC3	BOAXa.chrX	61.29	31	11	1	342	372	55084035	55083946	3.1	34.7
Cannabis_sativa_PT4_A0A455ZJC3	BOAXa.chr8	31.915	141	61	2	166	272	21790579	21790998	1.59e-07	58.2
Cannabis_sativa_PT4_A0A455ZJC3	BOAXa.chr8	25.414	181	50	3	303	398	21791685	21792227	9.06e-06	52.4
Cannabis_sativa_PT4_A0A455ZJC3	BOAXa.chr8	39.583	48	29	0	125	172	21789949	21790092	0.011	42.4
Cannabis_sativa_PT4_A0A455ZJC3	BOAXa.chr8	46.667	30	16	0	274	303	21791348	21791437	6.1	33.5
Cannabis_sativa_PT4_A0A455ZJC3	BOAXa.chr6	30.159	63	43	1	112	173	75922746	75922558	0.064	40
Cannabis_sativa_PT4_A0A455ZJC3	BOAXa.chr6	31.111	90	32	2	131	190	76010360	76010091	0.55	37
Cannabis_sativa_AAE1_H9A1V3	BOAXb.chr3	95.556	90	3	1	131	219	34440795	34441064	5.1e-99	178
Cannabis_sativa_AAE1_H9A1V3	BOAXb.chr3	100	68	0	0	218	285	34441178	34441381	5.1e-99	136
Cannabis_sativa_AAE1_H9A1V3	BOAXb.chr3	89.796	49	5	0	88	136	34440578	34440724	5.1e-99	92.8
Cannabis_sativa_AAE1_H9A1V3	BOAXb.chr3	98.851	87	1	0	1	87	34438161	34438421	9.22e-47	184
Cannabis_sativa_AAE1_H9A1V3	BOAXb.chr3	54.802	177	36	5	88	223	34393641	34394162	1.9e-42	171
Cannabis_sativa_AAE1_H9A1V3	BOAXb.chr3	92.405	79	6	0	469	547	34445129	34445365	9.11e-41	122
Cannabis_sativa_AAE1_H9A1V3	BOAXb.chr3	89.474	38	4	0	434	471	34444908	34445021	9.11e-41	69.3
Cannabis_sativa_AAE1_H9A1V3	BOAXb.chr3	100	74	0	0	366	439	34444434	34444655	1.3e-37	156
Cannabis_sativa_AAE1_H9A1V3	BOAXb.chr3	90.476	84	3	2	531	613	34445488	34445727	3.88e-37	154
Cannabis_sativa_AAE1_H9A1V3	BOAXb.chr3	78.824	85	18	0	355	439	34397110	34397364	1.32e-33	143
Cannabis_sativa_AAE1_H9A1V3	BOAXb.chr3	91.892	74	2	1	626	699	34446446	34446655	2.75e-31	136
Cannabis_sativa_AAE1_H9A1V3	BOAXb.chr3	73.171	82	22	0	5	86	34392606	34392851	4.61e-31	135
Cannabis_sativa_AAE1_H9A1V3	BOAXb.chr3	85.714	70	10	0	544	613	34398880	34399089	3.63e-30	132
Cannabis_sativa_AAE1_H9A1V3	BOAXb.chr3	82.353	68	12	0	218	285	34395124	34395327	2.8e-23	110
Cannabis_sativa_AAE1_H9A1V3	BOAXb.chr3	72.308	65	18	0	626	690	34403388	34403582	6.31e-21	103
Cannabis_sativa_AAE1_H9A1V3	BOAXb.chr3	70.667	75	22	0	469	543	34398426	34398650	3.23e-18	94.4
Cannabis_sativa_AAE1_H9A1V3	BOAXb.chr3	91.837	49	4	0	293	341	34443294	34443440	6.55e-18	93.6
Cannabis_sativa_AAE1_H9A1V3	BOAXb.chr3	62.791	43	16	0	299	341	34395830	34395958	3.42e-10	62.8
Cannabis_sativa_AAE1_H9A1V3	BOAXb.chr3	66.667	15	5	0	284	298	34395672	34395716	3.42e-10	25.4
Cannabis_sativa_AAE1_H9A1V3	BOAXb.chr3	90.625	32	3	0	440	471	34398176	34398271	1.36e-09	66.2
Cannabis_sativa_AAE1_H9A1V3	BOAXb.chr3	100	31	0	0	690	720	34446812	34446904	1.78e-09	65.9
Cannabis_sativa_AAE1_H9A1V3	BOAXb.chr3	96.154	26	1	0	341	366	34443899	34443976	8.21e-07	57.4
Cannabis_sativa_AAE1_H9A1V3	BOAXb.chr3	75	32	8	0	689	720	34403758	34403853	1.35e-06	56.6
Cannabis_sativa_AAE1_H9A1V3	BOAXb.chr3	58.537	41	17	0	332	372	34396730	34396852	4.65e-05	51.6
Cannabis_sativa_AAE1_H9A1V3	BOAXb.chr3	21.017	295	196	11	188	471	62370334	62369528	0.037	42
Cannabis_sativa_AAE1_H9A1V3	BOAXb.chr9	55	80	35	1	219	298	27987323	27987559	7.89e-42	80.9
Cannabis_sativa_AAE1_H9A1V3	BOAXb.chr9	47.727	88	42	4	131	216	27986979	27987236	7.89e-42	79.3
Cannabis_sativa_AAE1_H9A1V3	BOAXb.chr9	63.415	41	15	0	91	131	27986774	27986896	7.89e-42	55.5
Cannabis_sativa_AAE1_H9A1V3	BOAXb.chr9	51.923	104	48	1	357	458	28094989	28095300	2.24e-25	117
Cannabis_sativa_AAE1_H9A1V3	BOAXb.chr9	44	125	41	1	344	439	27988916	27989290	6.89e-25	115
Cannabis_sativa_AAE1_H9A1V3	BOAXb.chr9	40.441	136	53	1	438	545	27990266	27990673	1.02e-24	91.3
Cannabis_sativa_AAE1_H9A1V3	BOAXb.chr9	48.837	43	22	0	544	586	27990787	27990915	1.02e-24	46.6
Cannabis_sativa_AAE1_H9A1V3	BOAXb.chr9	42.424	99	51	3	132	228	28093767	28094051	5.41e-23	78.6
Cannabis_sativa_AAE1_H9A1V3	BOAXb.chr9	51.064	47	23	0	91	137	28093528	28093668	5.41e-23	53.1
Cannabis_sativa_AAE1_H9A1V3	BOAXb.chr9	52.308	65	29	1	626	690	27991327	27991515	4.78e-21	72.8
Cannabis_sativa_AAE1_H9A1V3	BOAXb.chr9	59.375	32	13	0	582	613	27991119	27991214	4.78e-21	42.4
Cannabis_sativa_AAE1_H9A1V3	BOAXb.chr9	44.828	29	16	0	689	717	27991626	27991712	4.78e-21	29.6
Cannabis_sativa_AAE1_H9A1V3	BOAXb.chr9	67.143	70	22	1	219	288	28094245	28094451	5.71e-16	87
Cannabis_sativa_AAE1_H9A1V3	BOAXb.chr9	46.316	95	47	1	451	545	28095943	28096215	2.27e-10	68.9
Cannabis_sativa_AAE1_H9A1V3	BOAXb.chr9	47.887	71	34	2	626	696	28096975	28097178	3.62e-10	68.2
Cannabis_sativa_AAE1_H9A1V3	BOAXb.chr9	43.137	51	27	1	423	471	28095761	28095913	0.000156	49.7
Cannabis_sativa_AAE1_H9A1V3	BOAXb.chr9	48.837	43	22	0	544	586	28096379	28096507	0.000342	48.5
Cannabis_sativa_AAE1_H9A1V3	BOAXb.chr9	47.059	51	23	1	299	345	27988299	27988451	0.002	45.8
Cannabis_sativa_AAE1_H9A1V3	BOAXb.chr9	55.882	34	15	0	580	613	28096734	28096835	0.018	43.1
Cannabis_sativa_AAE1_H9A1V3	BOAXb.chr9	50	30	13	1	689	718	28097322	28097405	8.4	34.3
Cannabis_sativa_AAE1_H9A1V3	BOAXb.chr5	24.907	269	161	10	219	471	73239052	73239783	1.54e-06	56.2
Cannabis_sativa_AAE1_H9A1V3	BOAXb.chr5	21.362	323	216	8	170	475	30321828	30320923	0.25	39.3
Cannabis_sativa_AAE1_H9A1V3	BOAXb.chr8	22.989	261	177	7	223	477	37159735	37160463	5.89e-05	51.2
Cannabis_sativa_AAE1_H9A1V3	BOAXb.chr8	23.569	297	188	10	199	485	4662655	4663458	0.004	45.1
Cannabis_sativa_AAE1_H9A1V3	BOAXb.chr8	36.538	52	32	1	165	216	6003122	6002970	0.21	32
Cannabis_sativa_AAE1_H9A1V3	BOAXb.chr8	24.762	105	49	1	223	297	6002851	6002537	0.21	25
Cannabis_sativa_AAE1_H9A1V3	BOAXb.chr6	23.774	265	181	8	219	477	3540652	3539903	0.014	43.5
Cannabis_sativa_AAE1_H9A1V3	BOAXb.chr6	30.709	127	74	6	360	477	3518802	3518437	0.31	38.9
Cannabis_sativa_AAE1_H9A1V3	BOAXb.chrX	21.154	208	145	5	247	453	82419015	82418446	2.1	36.2
Cannabis_sativa_AAE1_H9A1V3	BOAXb.chrX	20.701	314	226	7	174	477	16936613	16935711	2.7	35.8
Cannabis_sativa_GPPS_large_subunit_A0A1V0QSH4	BOAXb.chr4	98.982	393	4	0	1	393	6712093	6713271	0	764
Cannabis_sativa_GPPS_large_subunit_A0A1V0QSH4	BOAXb.chrX	41.15	226	113	6	173	391	77395063	77395701	1.5e-36	145
Cannabis_sativa_GPPS_large_subunit_A0A1V0QSH4	BOAXb.chrX	40.26	77	45	1	100	175	77394512	77394742	4.75e-12	72.4
Cannabis_sativa_GPPS_large_subunit_A0A1V0QSH4	BOAXb.chr6	30.493	223	144	3	101	314	40440619	40441281	4.14e-21	100
Cannabis_sativa_GPPS_large_subunit_A0A1V0QSH4	BOAXb.chr9	27.273	220	146	4	104	314	672956	673600	3.69e-17	88.2
Cannabis_sativa_GPPS_large_subunit_A0A1V0QSH4	BOAXb.chr1	37.624	101	63	0	265	365	9862414	9862716	1.29e-10	67.8
Cannabis_sativa_GPPS_large_subunit_A0A1V0QSH4	BOAXb.chr1	60.714	28	9	1	167	194	9861680	9861757	2.8	34.7
Cannabis_sativa_GPPS_small_subunit_A0A1V0QSG9	BOAXb.chr6	97.484	318	8	0	9	326	40440481	40441434	0	603
Cannabis_sativa_GPPS_small_subunit_A0A1V0QSG9	BOAXb.chr9	56.055	289	109	6	44	324	672899	673735	7.2e-84	280
Cannabis_sativa_GPPS_small_subunit_A0A1V0QSG9	BOAXb.chr4	31.364	220	140	3	58	275	6712402	6713034	7.92e-23	103
Cannabis_sativa_GPPS_small_subunit_A0A1V0QSG9	BOAXb.chrX	27.523	218	126	5	127	323	77395063	77395683	2.12e-06	53.9
Cannabis_sativa_GPPS_small_subunit_A0A1V0QSG9	BOAXb.chrX	28.571	98	60	3	36	129	77394467	77394742	0.003	43.9
Cannabis_sativa_OAC_I6WU39	BOAXb.chr9	73.529	136	1	1	1	101	3917825	3917418	2.52e-55	187
Cannabis_sativa_OAC_I6WU39	BOAXb.chr9	96.61	59	2	0	43	101	3910068	3909892	2.61e-47	122
Cannabis_sativa_OAC_I6WU39	BOAXb.chr9	100	42	0	0	1	42	3910295	3910170	2.61e-47	86.7
Cannabis_sativa_OAC_I6WU39	BOAXb.chr9	34.091	132	52	2	3	99	4802172	4801777	2.03e-16	76.6
Cannabis_sativa_OAC_I6WU39	BOAXb.chr9	48.333	60	31	0	40	99	3873958	3873779	1.31e-13	68.6
Cannabis_sativa_OAC_I6WU39	BOAXb.chr9	48.98	49	25	0	49	97	4797117	4796971	2.56e-09	56.6
Cannabis_sativa_OAC_I6WU39	BOAXb.chr9	52.778	36	17	0	3	38	4797386	4797279	4.23e-06	47.4
Cannabis_sativa_OAC_I6WU39	BOAXb.chr9	42.5	40	23	0	3	42	3874226	3874107	2.28e-05	45.1
Cannabis_sativa_OAC_I6WU39	BOAXb.chr5	23.75	80	56	2	12	90	34156938	34156711	0.82	32.3
Cannabis_sativa_OAC_I6WU39	BOAXb.chr2	29.31	58	40	1	41	97	1665807	1665980	0.84	32.3
Cannabis_sativa_OAC_I6WU39	BOAXb.chr8	25	52	39	0	30	81	11554863	11554708	1.5	31.6
Cannabis_sativa_OAC_I6WU39	BOAXb.chr1	19.802	101	73	2	1	97	27153020	27152730	1.7	31.2
Cannabis_sativa_OLS_B1Q2B6	BOAXb.chr8	94.659	337	18	0	49	385	5860418	5861428	0	664
Cannabis_sativa_OLS_B1Q2B6	BOAXb.chr8	94.659	337	18	0	49	385	5866672	5867682	0	664
Cannabis_sativa_OLS_B1Q2B6	BOAXb.chr8	79.819	332	65	1	54	383	5874319	5873324	0	563
Cannabis_sativa_OLS_B1Q2B6	BOAXb.chr8	73.494	332	87	1	54	384	5838059	5837064	1.95e-160	503
Cannabis_sativa_OLS_B1Q2B6	BOAXb.chr8	75.472	159	39	0	226	384	5832738	5832262	1.7e-89	247
Cannabis_sativa_OLS_B1Q2B6	BOAXb.chr8	70.833	72	21	0	158	229	5832941	5832726	1.7e-89	105
Cannabis_sativa_OLS_B1Q2B6	BOAXb.chr8	74.49	98	25	0	284	381	5099815	5100108	4.84e-39	152
Cannabis_sativa_OLS_B1Q2B6	BOAXb.chr8	96.226	53	2	0	1	53	5860030	5860188	3.88e-26	114
Cannabis_sativa_OLS_B1Q2B6	BOAXb.chr8	94.118	51	3	0	3	53	5866290	5866442	4.78e-24	108
Cannabis_sativa_OLS_B1Q2B6	BOAXb.chr8	89.796	49	5	0	5	53	5875210	5875064	1.32e-21	101
Cannabis_sativa_OLS_B1Q2B6	BOAXb.chr8	65.306	49	17	0	5	53	5840813	5840667	5.42e-14	78.2
Cannabis_sativa_OLS_B1Q2B6	BOAXb.chr8	23.276	232	136	9	155	368	18325128	18325751	0.16	38.5
Cannabis_sativa_OLS_B1Q2B6	BOAXb.chr8	28.571	63	42	1	302	361	4914521	4914333	9.4	33.1
Cannabis_sativa_OLS_B1Q2B6	BOAXb.chr9	65.46	359	119	1	30	383	12869296	12870372	3.26e-156	491
Cannabis_sativa_OLS_B1Q2B6	BOAXb.chr9	68.373	332	104	1	52	383	2002738	2001746	6.44e-149	469
Cannabis_sativa_OLS_B1Q2B6	BOAXb.chr9	64.815	54	19	0	5	58	2003387	2003226	1.69e-16	85.9
Cannabis_sativa_OLS_B1Q2B6	BOAXb.chr9	65.306	49	17	0	5	53	12869139	12869285	1.19e-14	80.1
Cannabis_sativa_OLS_B1Q2B6	BOAXb.chr9	34.722	72	42	2	297	368	13553026	13552826	0.07	39.7
Cannabis_sativa_OLS_B1Q2B6	BOAXb.chrX	66.159	328	111	0	54	381	55491389	55490406	1.35e-150	474
Cannabis_sativa_OLS_B1Q2B6	BOAXb.chrX	34.593	344	206	3	56	381	70495156	70494128	5.09e-64	225
Cannabis_sativa_OLS_B1Q2B6	BOAXb.chrX	53.226	62	29	0	5	66	55492283	55492098	3.28e-14	79
Cannabis_sativa_OLS_B1Q2B6	BOAXb.chrX	21.633	245	152	10	155	368	2441403	2440696	0.000739	46.2
Cannabis_sativa_OLS_B1Q2B6	BOAXb.chrX	23.887	247	144	10	155	368	227106	226399	0.003	44.3
Cannabis_sativa_OLS_B1Q2B6	BOAXb.chrX	30.588	85	52	3	297	381	64770879	64770646	0.96	36.2
Cannabis_sativa_OLS_B1Q2B6	BOAXb.chr1	56.757	333	139	3	54	383	48405667	48404675	4.56e-119	384
Cannabis_sativa_OLS_B1Q2B6	BOAXb.chr1	50	44	22	0	10	53	48406062	48405931	4.49e-05	50.1
Cannabis_sativa_OLS_B1Q2B6	BOAXb.chr1	23.077	247	146	9	155	368	14671947	14671240	0.016	42
Cannabis_sativa_OLS_B1Q2B6	BOAXb.chr1	21.012	257	163	8	143	368	23201705	23202448	0.031	40.8
Cannabis_sativa_OLS_B1Q2B6	BOAXb.chr1	26.606	109	74	3	258	360	51932006	51931680	1.8	35.4
Cannabis_sativa_OLS_B1Q2B6	BOAXb.chr5	36.01	411	217	5	8	381	47827206	47826001	1.03e-75	259
Cannabis_sativa_OLS_B1Q2B6	BOAXb.chr6	19.925	266	168	7	141	368	59504350	59505126	0.000596	46.6
Cannabis_sativa_OLS_B1Q2B6	BOAXb.chr6	33.333	72	43	2	297	368	59544975	59545175	0.019	41.6
Cannabis_sativa_OLS_B1Q2B6	BOAXb.chr6	30.588	85	52	3	297	381	36610265	36610032	0.076	39.7
Cannabis_sativa_OLS_B1Q2B6	BOAXb.chr6	33.333	72	43	2	297	368	35515365	35515165	0.076	39.7
Cannabis_sativa_OLS_B1Q2B6	BOAXb.chr2	21.538	260	164	11	141	368	55938727	55939482	0.008	42.7
Cannabis_sativa_OLS_B1Q2B6	BOAXb.chr2	30.435	69	43	2	297	360	73867908	73868114	4.7	33.9
Cannabis_sativa_OLS_B1Q2B6	BOAXb.chr4	31.944	72	44	2	297	368	78358190	78358390	0.012	42.4
Cannabis_sativa_OLS_B1Q2B6	BOAXb.chr7	30.909	55	38	0	292	346	24476397	24476561	8.7	33.1
Cannabis_sativa_PT4_A0A455ZJC3	BOAXb.chrX	100	77	0	0	172	248	55006595	55006825	4.27e-63	123
Cannabis_sativa_PT4_A0A455ZJC3	BOAXb.chrX	92.593	54	4	0	121	174	55006339	55006500	4.27e-63	108
Cannabis_sativa_PT4_A0A455ZJC3	BOAXb.chrX	75	32	8	0	241	272	55006917	55007012	4.27e-63	53.9
Cannabis_sativa_PT4_A0A455ZJC3	BOAXb.chrX	96.104	77	3	0	172	248	54838286	54838516	4.25e-52	119
Cannabis_sativa_PT4_A0A455ZJC3	BOAXb.chrX	96.104	77	3	0	172	248	54908873	54909103	4.25e-52	119
Cannabis_sativa_PT4_A0A455ZJC3	BOAXb.chrX	92.593	54	4	0	121	174	54838030	54838191	4.25e-52	108
Cannabis_sativa_PT4_A0A455ZJC3	BOAXb.chrX	92.593	54	4	0	121	174	54908617	54908778	4.25e-52	108
Cannabis_sativa_PT4_A0A455ZJC3	BOAXb.chrX	94.937	79	4	0	1	79	54835828	54836064	8.27e-41	158
Cannabis_sativa_PT4_A0A455ZJC3	BOAXb.chrX	93.671	79	5	0	1	79	54906416	54906652	2.5e-40	157
Cannabis_sativa_PT4_A0A455ZJC3	BOAXb.chrX	93.671	79	5	0	1	79	55000020	55000256	2.78e-40	157
Cannabis_sativa_PT4_A0A455ZJC3	BOAXb.chrX	91.139	79	7	0	1	79	54972149	54972385	8.56e-39	152
Cannabis_sativa_PT4_A0A455ZJC3	BOAXb.chrX	54.73	148	39	1	124	243	55049688	55049245	1.27e-33	137
Cannabis_sativa_PT4_A0A455ZJC3	BOAXb.chrX	46.857	175	34	4	1	122	55051595	55051089	2.07e-33	136
Cannabis_sativa_PT4_A0A455ZJC3	BOAXb.chrX	81.667	60	10	1	1	60	55044513	55044337	1.07e-21	102
Cannabis_sativa_PT4_A0A455ZJC3	BOAXb.chrX	97.826	46	1	0	77	122	55000595	55000732	2.68e-21	100
Cannabis_sativa_PT4_A0A455ZJC3	BOAXb.chrX	89.13	46	5	0	77	122	54836372	54836509	1.52e-19	95.5
Cannabis_sativa_PT4_A0A455ZJC3	BOAXb.chrX	89.13	46	5	0	77	122	54906958	54907095	1.52e-19	95.5
Cannabis_sativa_PT4_A0A455ZJC3	BOAXb.chrX	69.231	78	24	0	168	245	55040091	55039858	5.57e-18	90.5
Cannabis_sativa_PT4_A0A455ZJC3	BOAXb.chrX	88.889	27	3	0	372	398	55014770	55014850	2.82e-17	52.4
Cannabis_sativa_PT4_A0A455ZJC3	BOAXb.chrX	72.222	36	9	1	329	364	55014413	55014517	2.82e-17	49.3
Cannabis_sativa_PT4_A0A455ZJC3	BOAXb.chrX	83.333	18	1	1	359	374	55014631	55014684	2.82e-17	29.3
Cannabis_sativa_PT4_A0A455ZJC3	BOAXb.chrX	95.238	42	2	0	302	343	55013656	55013781	3.82e-15	82
Cannabis_sativa_PT4_A0A455ZJC3	BOAXb.chrX	53.659	41	19	0	303	343	55038636	55038514	5.55e-15	53.5
Cannabis_sativa_PT4_A0A455ZJC3	BOAXb.chrX	50	40	20	0	265	304	55038842	55038723	5.55e-15	49.7
Cannabis_sativa_PT4_A0A455ZJC3	BOAXb.chrX	88.889	27	3	0	372	398	54864339	54864419	1.59e-14	52.4
Cannabis_sativa_PT4_A0A455ZJC3	BOAXb.chrX	88.889	27	3	0	372	398	54918776	54918856	1.59e-14	52.4
Cannabis_sativa_PT4_A0A455ZJC3	BOAXb.chrX	40.217	92	9	2	329	375	54863984	54864256	1.59e-14	49.7
Cannabis_sativa_PT4_A0A455ZJC3	BOAXb.chrX	40.217	92	9	2	329	375	54918421	54918693	1.59e-14	49.7
Cannabis_sativa_PT4_A0A455ZJC3	BOAXb.chrX	88.095	42	5	0	302	343	54863233	54863358	2.7e-13	76.3
Cannabis_sativa_PT4_A0A455ZJC3	BOAXb.chrX	88.095	42	5	0	302	343	54917670	54917795	2.7e-13	76.3
Cannabis_sativa_PT4_A0A455ZJC3	BOAXb.chrX	50	84	38	1	172	251	54759931	54760182	6.37e-12	72
Cannabis_sativa_PT4_A0A455ZJC3	BOAXb.chrX	97.059	34	1	0	271	304	55013372	55013473	1.24e-11	70.9
Cannabis_sativa_PT4_A0A455ZJC3	BOAXb.chrX	52.703	74	34	1	172	244	63156495	63156716	1.71e-11	69.7
Cannabis_sativa_PT4_A0A455ZJC3	BOAXb.chrX	38.462	26	16	0	247	272	63156812	63156889	1.71e-11	21.9
Cannabis_sativa_PT4_A0A455ZJC3	BOAXb.chrX	94.118	34	2	0	271	304	54917389	54917490	4.99e-11	68.9
Cannabis_sativa_PT4_A0A455ZJC3	BOAXb.chrX	36.842	133	52	3	172	272	63085480	63085878	1.19e-10	67.8
Cannabis_sativa_PT4_A0A455ZJC3	BOAXb.chrX	91.176	34	3	0	271	304	54862952	54863053	2.33e-10	67
Cannabis_sativa_PT4_A0A455ZJC3	BOAXb.chrX	40.476	42	25	0	303	344	63157965	63158090	1.06e-08	42.7
Cannabis_sativa_PT4_A0A455ZJC3	BOAXb.chrX	48.387	31	16	0	273	303	63157774	63157866	1.06e-08	39.3
Cannabis_sativa_PT4_A0A455ZJC3	BOAXb.chrX	30.556	108	40	1	273	345	54760531	54760854	1.57e-08	61.2
Cannabis_sativa_PT4_A0A455ZJC3	BOAXb.chrX	57.143	49	21	0	124	172	55040629	55040483	2.15e-08	60.8
Cannabis_sativa_PT4_A0A455ZJC3	BOAXb.chrX	54.717	53	22	2	121	172	63084360	63084515	3.11e-08	49.7
Cannabis_sativa_PT4_A0A455ZJC3	BOAXb.chrX	34.483	29	19	0	91	119	63084155	63084241	3.11e-08	30.8
Cannabis_sativa_PT4_A0A455ZJC3	BOAXb.chrX	64.286	42	15	0	173	214	63204549	63204674	8.31e-08	58.9
Cannabis_sativa_PT4_A0A455ZJC3	BOAXb.chrX	42.857	42	24	0	303	344	63086635	63086760	3.58e-07	42.7
Cannabis_sativa_PT4_A0A455ZJC3	BOAXb.chrX	40.625	32	19	0	272	303	63086441	63086536	3.58e-07	33.9
Cannabis_sativa_PT4_A0A455ZJC3	BOAXb.chrX	54.762	42	19	0	303	344	55047532	55047407	1.05e-06	55.5
Cannabis_sativa_PT4_A0A455ZJC3	BOAXb.chrX	75	32	8	0	241	272	54852182	54852277	3.34e-06	53.9
Cannabis_sativa_PT4_A0A455ZJC3	BOAXb.chrX	55.769	52	22	1	258	309	54860910	54861062	3.67e-06	53.5
Cannabis_sativa_PT4_A0A455ZJC3	BOAXb.chrX	69.231	39	11	1	271	309	54857740	54857853	8.66e-06	52.4
Cannabis_sativa_PT4_A0A455ZJC3	BOAXb.chrX	69.231	39	11	1	271	309	54915382	54915495	8.66e-06	52.4
Cannabis_sativa_PT4_A0A455ZJC3	BOAXb.chrX	74.194	31	8	0	242	272	54909348	54909440	1.25e-05	52
Cannabis_sativa_PT4_A0A455ZJC3	BOAXb.chrX	44.898	49	27	0	124	172	54758816	54758962	2.53e-05	42.7
Cannabis_sativa_PT4_A0A455ZJC3	BOAXb.chrX	33.333	33	19	1	90	119	54758602	54758700	2.53e-05	27.3
Cannabis_sativa_PT4_A0A455ZJC3	BOAXb.chrX	51.111	45	20	1	78	122	55044105	55043977	5.01e-05	50.1
Cannabis_sativa_PT4_A0A455ZJC3	BOAXb.chrX	48.78	41	21	0	264	304	55047800	55047678	0.001	45.8
Cannabis_sativa_PT4_A0A455ZJC3	BOAXb.chrX	33.333	54	36	0	291	344	63207775	63207936	0.001	45.8
Cannabis_sativa_PT4_A0A455ZJC3	BOAXb.chrX	42.857	49	28	0	124	172	63195573	63195719	0.022	41.6
Cannabis_sativa_PT4_A0A455ZJC3	BOAXb.chrX	42.857	49	28	0	124	172	63155476	63155622	0.028	41.2
Cannabis_sativa_PT4_A0A455ZJC3	BOAXb.chrX	61.29	31	12	0	342	372	55037750	55037658	0.17	38.5
Cannabis_sativa_PT4_A0A455ZJC3	BOAXb.chrX	64	25	9	0	374	398	55046764	55046690	0.24	38.1
Cannabis_sativa_PT4_A0A455ZJC3	BOAXb.chrX	64	25	9	0	374	398	55037421	55037347	0.46	37.4
Cannabis_sativa_PT4_A0A455ZJC3	BOAXb.chrX	56.757	37	16	0	331	367	55047162	55047052	0.48	37.4
Cannabis_sativa_PT4_A0A455ZJC3	BOAXb.chr8	41.25	80	46	1	166	245	32695580	32695344	3.53e-07	57
Cannabis_sativa_PT4_A0A455ZJC3	BOAXb.chr8	25.414	181	50	3	303	398	32694498	32693956	8.74e-06	52.4
Cannabis_sativa_PT4_A0A455ZJC3	BOAXb.chr8	39.583	48	29	0	125	172	32696193	32696050	0.011	42.4
Cannabis_sativa_PT4_A0A455ZJC3	BOAXb.chr8	46.667	30	16	0	274	303	32694838	32694749	5.9	33.5
Cannabis_sativa_PT4_A0A455ZJC3	BOAXb.chr4	28.571	63	44	1	112	173	55275249	55275437	1	36.2
Cannabis_sativa_PT4_A0A455ZJC3	BOAXb.chr3	46.667	30	16	0	2	31	36605901	36605812	5	33.9
Cannabis_sativa_AAE1_H9A1V3	CANN.00096	66.049	162	25	2	88	219	229715	229230	1.99e-83	197
Cannabis_sativa_AAE1_H9A1V3	CANN.00096	100	68	0	0	218	285	229116	228913	1.99e-83	136
Cannabis_sativa_AAE1_H9A1V3	CANN.00096	98.851	87	1	0	1	87	232133	231873	7.08e-47	184
Cannabis_sativa_AAE1_H9A1V3	CANN.00096	92.405	79	6	0	469	547	225172	224936	7.36e-41	122
Cannabis_sativa_AAE1_H9A1V3	CANN.00096	89.474	38	4	0	434	471	225393	225280	7.36e-41	69.3
Cannabis_sativa_AAE1_H9A1V3	CANN.00096	53.333	105	12	2	88	156	276613	276302	1.09e-38	95.9
Cannabis_sativa_AAE1_H9A1V3	CANN.00096	60	70	26	2	154	223	276296	276093	1.09e-38	88.2
Cannabis_sativa_AAE1_H9A1V3	CANN.00096	100	74	0	0	366	439	225866	225645	9.99e-38	156
Cannabis_sativa_AAE1_H9A1V3	CANN.00096	90.476	84	3	2	531	613	224813	224574	2.98e-37	154
Cannabis_sativa_AAE1_H9A1V3	CANN.00096	78.824	85	18	0	355	439	273148	272894	1.01e-33	143
Cannabis_sativa_AAE1_H9A1V3	CANN.00096	91.892	74	2	1	626	699	223856	223647	2.11e-31	136
Cannabis_sativa_AAE1_H9A1V3	CANN.00096	73.171	82	22	0	5	86	277650	277405	3.54e-31	135
Cannabis_sativa_AAE1_H9A1V3	CANN.00096	85.714	70	10	0	544	613	271381	271172	2.79e-30	132
Cannabis_sativa_AAE1_H9A1V3	CANN.00096	49.367	158	26	2	440	543	272084	271611	7.13e-26	118
Cannabis_sativa_AAE1_H9A1V3	CANN.00096	82.353	68	12	0	218	285	275131	274928	2.15e-23	110
Cannabis_sativa_AAE1_H9A1V3	CANN.00096	72.308	65	18	0	626	690	266878	266684	4.85e-21	103
Cannabis_sativa_AAE1_H9A1V3	CANN.00096	91.837	49	4	0	293	341	227006	226860	5.04e-18	93.6
Cannabis_sativa_AAE1_H9A1V3	CANN.00096	62.791	43	16	0	299	341	274426	274298	3.09e-10	62.8
Cannabis_sativa_AAE1_H9A1V3	CANN.00096	66.667	15	5	0	284	298	274583	274539	3.09e-10	25.4
Cannabis_sativa_AAE1_H9A1V3	CANN.00096	100	31	0	0	690	720	223490	223398	1.37e-09	65.9
Cannabis_sativa_AAE1_H9A1V3	CANN.00096	96.154	26	1	0	341	366	226401	226324	6.32e-07	57.4
Cannabis_sativa_AAE1_H9A1V3	CANN.00096	75	32	8	0	689	720	266508	266413	1.04e-06	56.6
Cannabis_sativa_AAE1_H9A1V3	CANN.00096	58.537	41	17	0	332	372	273528	273406	3.58e-05	51.6
Cannabis_sativa_AAE1_H9A1V3	CANN.07064	61.429	70	26	1	219	288	6196	5990	5.07e-42	81.3
Cannabis_sativa_AAE1_H9A1V3	CANN.07064	47.727	88	42	4	131	216	6540	6283	5.07e-42	79.3
Cannabis_sativa_AAE1_H9A1V3	CANN.07064	63.415	41	15	0	91	131	6745	6623	5.07e-42	55.5
Cannabis_sativa_AAE1_H9A1V3	CANN.07064	38.65	163	57	3	344	463	4602	4114	6.06e-26	119
Cannabis_sativa_AAE1_H9A1V3	CANN.07064	52.308	65	29	1	626	690	2108	1920	4.79e-21	72.8
Cannabis_sativa_AAE1_H9A1V3	CANN.07064	59.375	32	13	0	582	613	2316	2221	4.79e-21	42.4
Cannabis_sativa_AAE1_H9A1V3	CANN.07064	44.828	29	16	0	689	717	1809	1723	4.79e-21	29.6
Cannabis_sativa_AAE1_H9A1V3	CANN.07064	40.146	137	54	1	437	545	3198	2788	1.77e-17	91.7
Cannabis_sativa_AAE1_H9A1V3	CANN.07064	48.837	43	22	0	544	586	2648	2520	0.001	46.6
Cannabis_sativa_AAE1_H9A1V3	CANN.07064	47.059	51	23	1	299	345	5220	5068	0.002	45.8
Cannabis_sativa_AAE1_H9A1V3	CANN.04629	45.714	140	45	2	350	458	14722	14303	3.84e-27	122
Cannabis_sativa_AAE1_H9A1V3	CANN.04629	42.424	99	51	3	132	228	16877	16593	4.69e-23	78.6
Cannabis_sativa_AAE1_H9A1V3	CANN.04629	51.064	47	23	0	91	137	17116	16976	4.69e-23	53.1
Cannabis_sativa_AAE1_H9A1V3	CANN.04629	68.657	67	20	1	219	285	16399	16202	8.04e-16	86.3
Cannabis_sativa_AAE1_H9A1V3	CANN.04629	45.833	96	48	1	451	546	13660	13385	1.47e-10	68.9
Cannabis_sativa_AAE1_H9A1V3	CANN.04629	47.887	71	34	2	626	696	12627	12424	2.71e-10	68.2
Cannabis_sativa_AAE1_H9A1V3	CANN.04629	43.137	51	27	1	423	471	13842	13690	0.000118	49.7
Cannabis_sativa_AAE1_H9A1V3	CANN.04629	48.837	43	22	0	544	586	13223	13095	0.000259	48.5
Cannabis_sativa_AAE1_H9A1V3	CANN.04629	55.882	34	15	0	580	613	12868	12767	0.013	43.1
Cannabis_sativa_AAE1_H9A1V3	CANN.04629	50	30	13	1	689	718	12280	12197	4.7	34.7
Cannabis_sativa_AAE1_H9A1V3	CANN.02894	50.962	104	49	1	357	458	38545	38234	2.38e-25	117
Cannabis_sativa_AAE1_H9A1V3	CANN.02894	42.424	99	51	3	132	228	40812	40528	1.5e-17	78.6
Cannabis_sativa_AAE1_H9A1V3	CANN.02894	66.667	21	7	0	111	131	40991	40929	1.5e-17	34.7
Cannabis_sativa_AAE1_H9A1V3	CANN.02894	67.143	70	22	1	219	288	40334	40128	4.32e-16	87
Cannabis_sativa_AAE1_H9A1V3	CANN.02894	46.316	95	47	1	451	545	37591	37319	1.72e-10	68.9
Cannabis_sativa_AAE1_H9A1V3	CANN.02894	47.887	71	34	2	626	696	36559	36356	2.75e-10	68.2
Cannabis_sativa_AAE1_H9A1V3	CANN.02894	43.137	51	27	1	423	471	37773	37621	0.000119	49.7
Cannabis_sativa_AAE1_H9A1V3	CANN.02894	48.837	43	22	0	544	586	37155	37027	0.000261	48.5
Cannabis_sativa_AAE1_H9A1V3	CANN.02894	55.882	34	15	0	580	613	36800	36699	0.014	43.1
Cannabis_sativa_AAE1_H9A1V3	CANN.02894	55.556	36	16	0	299	334	39299	39192	0.017	42.7
Cannabis_sativa_AAE1_H9A1V3	CANN.02894	50	30	13	1	689	718	36212	36129	6.5	34.3
Cannabis_sativa_AAE1_H9A1V3	CANN.04710	35.115	131	45	2	626	718	1247	1633	4.25e-20	79.3
Cannabis_sativa_AAE1_H9A1V3	CANN.04710	59.375	32	13	0	582	613	1038	1133	4.25e-20	42.4
Cannabis_sativa_AAE1_H9A1V3	CANN.04710	43.137	102	30	1	437	510	159	464	6.22e-16	86.7
Cannabis_sativa_AAE1_H9A1V3	CANN.04710	48.837	43	22	0	544	586	706	834	0.002	46.2
Cannabis_sativa_AAE1_H9A1V3	CANN.00052	23.774	265	181	8	219	477	232830	232081	0.01	43.5
Cannabis_sativa_AAE1_H9A1V3	CANN.00052	30.709	127	74	6	360	477	211016	210651	0.24	38.9
Cannabis_sativa_AAE1_H9A1V3	CANN.00066	22.043	186	123	6	188	371	2271	2768	0.068	40.8
Cannabis_sativa_AAE1_H9A1V3	CANN.01247	36.538	52	32	1	165	216	100947	100795	0.28	32
Cannabis_sativa_AAE1_H9A1V3	CANN.01247	24.762	105	49	1	223	297	100676	100362	0.28	25
Cannabis_sativa_AAE1_H9A1V3	CANN.02384	20.673	208	146	5	247	453	42387	42956	5.1	34.7
Cannabis_sativa_AAE1_H9A1V3	CANN.01426	36.842	38	24	0	446	483	58662	58549	10	33.5
Cannabis_sativa_GPPS_large_subunit_A0A1V0QSH4	CANN.04207	94.602	352	9	2	43	393	9062	8034	0	635
Cannabis_sativa_GPPS_large_subunit_A0A1V0QSH4	CANN.04207	89.61	77	8	0	1	77	9211	8981	2.06e-36	145
Cannabis_sativa_GPPS_large_subunit_A0A1V0QSH4	CANN.00558	31.364	220	140	3	104	314	142699	143352	2.6e-21	100
Cannabis_sativa_GPPS_large_subunit_A0A1V0QSH4	CANN.04466	31.325	166	103	3	158	314	28665	29156	1.08e-08	61.2
Cannabis_sativa_GPPS_large_subunit_A0A1V0QSH4	CANN.04466	29.412	68	46	1	104	169	28504	28707	0.003	44.3
Cannabis_sativa_GPPS_small_subunit_A0A1V0QSG9	CANN.00558	100	318	0	0	9	326	142552	143505	0	617
Cannabis_sativa_GPPS_small_subunit_A0A1V0QSG9	CANN.04466	97.758	223	2	1	104	326	28650	29309	1.47e-169	402
Cannabis_sativa_GPPS_small_subunit_A0A1V0QSG9	CANN.04466	99.038	104	1	0	9	112	28357	28668	1.47e-169	216
Cannabis_sativa_GPPS_small_subunit_A0A1V0QSG9	CANN.04207	31.364	220	140	3	58	275	8903	8271	8.14e-23	103
Cannabis_sativa_OAC_I6WU39	CANN.03438	35.938	128	44	1	10	99	41349	41732	5.32e-18	80.9
Cannabis_sativa_OAC_I6WU39	CANN.07060	19.802	101	73	2	1	97	3304	3594	0.55	32.3
Cannabis_sativa_OAC_I6WU39	CANN.00022	23.75	80	56	2	12	90	290876	290649	0.63	32.3
Cannabis_sativa_OAC_I6WU39	CANN.04214	29.31	58	40	1	41	97	1684	1511	0.64	32.3
Cannabis_sativa_OAC_I6WU39	CANN.09418	25	52	39	0	30	81	3122	3277	1.2	31.6
Cannabis_sativa_OLS_B1Q2B6	CANN.04050	62.857	350	130	0	32	381	19214	20263	3.46e-151	476
Cannabis_sativa_OLS_B1Q2B6	CANN.04050	65.306	49	17	0	5	53	18390	18536	2.13e-14	79
Cannabis_sativa_OLS_B1Q2B6	CANN.00449	68.06	335	106	1	49	383	25265	26266	8.09e-149	469
Cannabis_sativa_OLS_B1Q2B6	CANN.00449	64.815	54	19	0	5	58	24482	24643	1.17e-16	85.9
Cannabis_sativa_OLS_B1Q2B6	CANN.05527	74.843	159	40	0	226	384	8469	8945	1.01e-129	245
Cannabis_sativa_OLS_B1Q2B6	CANN.05527	71.631	141	39	1	54	193	7952	8374	1.01e-129	208
Cannabis_sativa_OLS_B1Q2B6	CANN.05527	65.789	38	13	0	194	231	8374	8487	1.01e-129	54.3
Cannabis_sativa_OLS_B1Q2B6	CANN.05527	64.444	45	16	0	5	49	5019	5153	2.55e-11	69.3
Cannabis_sativa_OLS_B1Q2B6	CANN.06089	56.757	333	139	3	54	383	5269	4277	2.32e-118	381
Cannabis_sativa_OLS_B1Q2B6	CANN.06089	47.727	44	23	0	10	53	5664	5533	9.19e-05	48.5
Cannabis_sativa_OLS_B1Q2B6	CANN.00487	40.798	326	185	3	56	381	61091	60138	8.76e-73	250
Cannabis_sativa_OLS_B1Q2B6	CANN.06272	38.308	201	123	1	56	256	10640	11239	5.85e-53	145
Cannabis_sativa_OLS_B1Q2B6	CANN.06272	29.861	144	83	2	256	381	11236	11667	5.85e-53	85.1
Cannabis_sativa_OLS_B1Q2B6	CANN.00008	19.549	266	169	8	141	368	217090	217866	0.000451	46.6
Cannabis_sativa_OLS_B1Q2B6	CANN.00008	33.333	72	43	2	297	368	273721	273921	0.015	41.6
Cannabis_sativa_OLS_B1Q2B6	CANN.00246	21.154	260	165	11	141	368	245628	244873	0.004	43.5
Cannabis_sativa_OLS_B1Q2B6	CANN.01295	26.087	138	93	5	234	368	24323	23928	0.016	41.6
Cannabis_sativa_OLS_B1Q2B6	CANN.04745	21.012	257	163	8	143	368	21279	20536	0.023	40.8
Cannabis_sativa_OLS_B1Q2B6	CANN.03323	21.012	257	163	8	143	368	32796	32053	0.024	40.8
Cannabis_sativa_OLS_B1Q2B6	CANN.01294	33.333	72	43	2	297	368	65356	65556	0.062	39.7
Cannabis_sativa_OLS_B1Q2B6	CANN.06577	34.722	72	42	2	297	368	6013	5813	0.062	39.7
Cannabis_sativa_OLS_B1Q2B6	CANN.00520	23.276	232	136	9	155	368	78682	78059	0.17	38.1
Cannabis_sativa_OLS_B1Q2B6	CANN.04703	26.606	109	74	3	258	360	22368	22694	0.54	36.6
Cannabis_sativa_OLS_B1Q2B6	CANN.01561	30.588	85	52	3	297	381	18550	18783	0.73	36.2
Cannabis_sativa_OLS_B1Q2B6	CANN.00208	32.143	56	37	1	297	351	16342	16509	3.8	33.9
Cannabis_sativa_OLS_B1Q2B6	CANN.03597	56	25	11	0	136	160	11019	10945	8.3	32.7
Cannabis_sativa_OLS_B1Q2B6	CANN.03597	56	25	11	0	136	160	8773	8699	9.6	32.3
Cannabis_sativa_PT4_A0A455ZJC3	CANN.01658	73.134	134	3	1	172	272	62972	62571	5.88e-62	152
Cannabis_sativa_PT4_A0A455ZJC3	CANN.01658	92.593	54	4	0	121	174	63228	63067	5.88e-62	108
Cannabis_sativa_PT4_A0A455ZJC3	CANN.01658	93.671	79	5	0	1	79	65443	65207	4.3e-40	155
Cannabis_sativa_PT4_A0A455ZJC3	CANN.01658	91.304	46	4	0	77	122	64911	64774	2.19e-20	97.4
Cannabis_sativa_PT4_A0A455ZJC3	CANN.01658	88.889	27	3	0	372	398	53239	53159	2.47e-17	52.4
Cannabis_sativa_PT4_A0A455ZJC3	CANN.01658	72.222	36	9	1	329	364	53598	53494	2.47e-17	49.3
Cannabis_sativa_PT4_A0A455ZJC3	CANN.01658	83.333	18	1	1	359	374	53378	53325	2.47e-17	29.3
Cannabis_sativa_PT4_A0A455ZJC3	CANN.01658	88.095	42	5	0	302	343	54345	54220	1.12e-12	73.9
Cannabis_sativa_PT4_A0A455ZJC3	CANN.01658	94.118	34	2	0	271	304	54624	54523	2.93e-11	69.3
Cannabis_sativa_PT4_A0A455ZJC3	CANN.01658	69.231	39	11	1	271	309	56633	56520	6.64e-06	52.4
Cannabis_sativa_PT4_A0A455ZJC3	CANN.00080	97.403	77	2	0	172	248	419300	419530	7.1e-53	121
Cannabis_sativa_PT4_A0A455ZJC3	CANN.00080	92.593	54	4	0	121	174	419044	419205	7.1e-53	108
Cannabis_sativa_PT4_A0A455ZJC3	CANN.00080	93.671	79	5	0	1	79	416814	417050	1.92e-40	157
Cannabis_sativa_PT4_A0A455ZJC3	CANN.00080	89.13	46	5	0	77	122	417376	417513	6.25e-19	93.2
Cannabis_sativa_PT4_A0A455ZJC3	CANN.00080	88.889	27	3	0	372	398	435887	435967	2.34e-17	52.4
Cannabis_sativa_PT4_A0A455ZJC3	CANN.00080	72.222	36	9	1	329	364	435528	435632	2.34e-17	49.3
Cannabis_sativa_PT4_A0A455ZJC3	CANN.00080	83.333	18	1	1	359	374	435748	435801	2.34e-17	29.3
Cannabis_sativa_PT4_A0A455ZJC3	CANN.00080	88.095	42	5	0	302	343	434781	434906	1.12e-12	73.9
Cannabis_sativa_PT4_A0A455ZJC3	CANN.00080	47.778	90	43	1	172	257	324202	324471	2.41e-12	72.8
Cannabis_sativa_PT4_A0A455ZJC3	CANN.00080	94.118	34	2	0	271	304	434502	434603	2.95e-11	69.3
Cannabis_sativa_PT4_A0A455ZJC3	CANN.00080	40.909	44	26	0	302	345	324993	325124	2.46e-09	47.4
Cannabis_sativa_PT4_A0A455ZJC3	CANN.00080	48.387	31	16	0	273	303	324802	324894	2.46e-09	36.6
Cannabis_sativa_PT4_A0A455ZJC3	CANN.00080	75	32	8	0	241	272	423736	423831	2.57e-06	53.9
Cannabis_sativa_PT4_A0A455ZJC3	CANN.00080	55.769	52	22	1	258	309	432458	432610	2.83e-06	53.5
Cannabis_sativa_PT4_A0A455ZJC3	CANN.00080	69.231	39	11	1	271	309	429288	429401	6.67e-06	52.4
Cannabis_sativa_PT4_A0A455ZJC3	CANN.00080	30.252	119	47	3	90	172	322876	323232	0.000276	47.4
Cannabis_sativa_PT4_A0A455ZJC3	CANN.00159	71.014	69	20	0	175	243	190011	189805	1.26e-30	90.1
Cannabis_sativa_PT4_A0A455ZJC3	CANN.00159	62.745	51	19	0	124	174	190247	190095	1.26e-30	66.2
Cannabis_sativa_PT4_A0A455ZJC3	CANN.00159	73.611	72	17	2	1	72	185100	184891	2.14e-22	103
Cannabis_sativa_PT4_A0A455ZJC3	CANN.00159	38.462	143	29	4	33	122	192052	191642	1.01e-19	81.6
Cannabis_sativa_PT4_A0A455ZJC3	CANN.00159	85	20	3	0	1	20	192146	192087	1.01e-19	37.7
Cannabis_sativa_PT4_A0A455ZJC3	CANN.00159	69.231	78	24	0	168	245	180756	180523	4.28e-18	90.5
Cannabis_sativa_PT4_A0A455ZJC3	CANN.00159	53.659	41	19	0	303	343	179304	179182	5.84e-15	53.5
Cannabis_sativa_PT4_A0A455ZJC3	CANN.00159	50	40	20	0	265	304	179510	179391	5.84e-15	49.7
Cannabis_sativa_PT4_A0A455ZJC3	CANN.00159	56.863	51	22	0	122	172	181300	181148	1.16e-08	61.2
Cannabis_sativa_PT4_A0A455ZJC3	CANN.00159	54.762	42	19	0	303	344	188107	187982	9.99e-07	55.1
Cannabis_sativa_PT4_A0A455ZJC3	CANN.00159	45.946	37	20	0	264	300	188360	188250	0.19	38.1
Cannabis_sativa_PT4_A0A455ZJC3	CANN.00159	64	25	9	0	374	398	187346	187272	0.23	37.7
Cannabis_sativa_PT4_A0A455ZJC3	CANN.00159	64	25	9	0	374	398	178097	178023	0.36	37.4
Cannabis_sativa_PT4_A0A455ZJC3	CANN.00159	56.757	37	16	0	331	367	187737	187627	0.37	37.4
Cannabis_sativa_PT4_A0A455ZJC3	CANN.00159	58.824	17	7	0	106	122	184612	184562	1.1	27.3
Cannabis_sativa_PT4_A0A455ZJC3	CANN.00159	86.667	15	1	1	90	103	184662	184618	1.1	26.2
Cannabis_sativa_PT4_A0A455ZJC3	CANN.00159	61.29	31	11	1	342	372	178423	178334	2.3	34.7
Cannabis_sativa_PT4_A0A455ZJC3	CANN.00309	54.054	74	33	1	172	244	98375	98596	2.36e-11	69.7
Cannabis_sativa_PT4_A0A455ZJC3	CANN.00309	40.476	42	25	0	303	344	99852	99977	1e-08	42.7
Cannabis_sativa_PT4_A0A455ZJC3	CANN.00309	48.387	31	16	0	273	303	99661	99753	1e-08	39.3
Cannabis_sativa_PT4_A0A455ZJC3	CANN.00309	64.286	42	15	0	173	214	146439	146564	1.26e-08	61.2
Cannabis_sativa_PT4_A0A455ZJC3	CANN.00309	28.571	70	46	1	275	344	149615	149812	0.001	45.4
Cannabis_sativa_PT4_A0A455ZJC3	CANN.00309	42.857	49	28	0	124	172	137481	137627	0.017	41.6
Cannabis_sativa_PT4_A0A455ZJC3	CANN.00309	42.857	49	28	0	124	172	97352	97498	0.027	40.8
Cannabis_sativa_PT4_A0A455ZJC3	CANN.00539	31.915	141	61	2	166	272	210992	210573	1.29e-07	57.8
Cannabis_sativa_PT4_A0A455ZJC3	CANN.00539	25.414	181	50	3	303	398	209944	209402	6.72e-06	52.4
Cannabis_sativa_PT4_A0A455ZJC3	CANN.00539	39.583	48	29	0	125	172	211605	211462	0.008	42.4
Cannabis_sativa_PT4_A0A455ZJC3	CANN.00539	46.667	30	16	0	274	303	210251	210162	4.5	33.5
Cannabis_sativa_PT4_A0A455ZJC3	CANN.00150	26.613	124	54	4	125	213	312339	312704	0.45	37
Cannabis_sativa_PT4_A0A455ZJC3	CANN.06598	30.159	63	43	1	112	173	14965	15153	0.51	36.6
Cannabis_sativa_PT4_A0A455ZJC3	CANN.00044	46.667	30	16	0	2	31	192886	192975	3.8	33.9
Cannabis_sativa_AAE1_H9A1V3	CBDRX.chr3	95.556	90	3	1	131	219	54963463	54963732	5.86e-99	178
Cannabis_sativa_AAE1_H9A1V3	CBDRX.chr3	100	68	0	0	218	285	54963846	54964049	5.86e-99	136
Cannabis_sativa_AAE1_H9A1V3	CBDRX.chr3	89.796	49	5	0	88	136	54963246	54963392	5.86e-99	92.8
Cannabis_sativa_AAE1_H9A1V3	CBDRX.chr3	98.851	87	1	0	1	87	54960848	54961108	1.06e-46	184
Cannabis_sativa_AAE1_H9A1V3	CBDRX.chr3	54.802	177	36	5	88	223	54916474	54916995	2.19e-42	171
Cannabis_sativa_AAE1_H9A1V3	CBDRX.chr3	92.405	79	6	0	469	547	54967797	54968033	1.05e-40	122
Cannabis_sativa_AAE1_H9A1V3	CBDRX.chr3	89.474	38	4	0	434	471	54967576	54967689	1.05e-40	69.3
Cannabis_sativa_AAE1_H9A1V3	CBDRX.chr3	100	74	0	0	366	439	54967102	54967323	1.5e-37	156
Cannabis_sativa_AAE1_H9A1V3	CBDRX.chr3	90.476	84	3	2	531	613	54968156	54968395	4.48e-37	154
Cannabis_sativa_AAE1_H9A1V3	CBDRX.chr3	78.824	85	18	0	355	439	54919943	54920197	1.52e-33	143
Cannabis_sativa_AAE1_H9A1V3	CBDRX.chr3	91.892	74	2	1	626	699	54969114	54969323	3.17e-31	136
Cannabis_sativa_AAE1_H9A1V3	CBDRX.chr3	73.171	82	22	0	5	86	54915437	54915682	5.31e-31	135
Cannabis_sativa_AAE1_H9A1V3	CBDRX.chr3	85.714	70	10	0	544	613	54921713	54921922	4.18e-30	132
Cannabis_sativa_AAE1_H9A1V3	CBDRX.chr3	82.353	68	12	0	218	285	54917957	54918160	3.23e-23	110
Cannabis_sativa_AAE1_H9A1V3	CBDRX.chr3	72.308	65	18	0	626	690	54926221	54926415	7.28e-21	103
Cannabis_sativa_AAE1_H9A1V3	CBDRX.chr3	70.667	75	22	0	469	543	54921259	54921483	3.72e-18	94.4
Cannabis_sativa_AAE1_H9A1V3	CBDRX.chr3	91.837	49	4	0	293	341	54965962	54966108	7.55e-18	93.6
Cannabis_sativa_AAE1_H9A1V3	CBDRX.chr3	62.791	43	16	0	299	341	54918663	54918791	3.91e-10	62.8
Cannabis_sativa_AAE1_H9A1V3	CBDRX.chr3	66.667	15	5	0	284	298	54918505	54918549	3.91e-10	25.4
Cannabis_sativa_AAE1_H9A1V3	CBDRX.chr3	90.625	32	3	0	440	471	54921009	54921104	1.57e-09	66.2
Cannabis_sativa_AAE1_H9A1V3	CBDRX.chr3	100	31	0	0	690	720	54969480	54969572	2.05e-09	65.9
Cannabis_sativa_AAE1_H9A1V3	CBDRX.chr3	96.154	26	1	0	341	366	54966567	54966644	9.46e-07	57.4
Cannabis_sativa_AAE1_H9A1V3	CBDRX.chr3	75	32	8	0	689	720	54926591	54926686	1.56e-06	56.6
Cannabis_sativa_AAE1_H9A1V3	CBDRX.chr3	58.537	41	17	0	332	372	54919563	54919685	5.36e-05	51.6
Cannabis_sativa_AAE1_H9A1V3	CBDRX.chr3	21.695	295	194	11	188	471	56111872	56112678	0.018	43.1
Cannabis_sativa_AAE1_H9A1V3	CBDRX.chr9	55	80	35	1	219	298	39023399	39023163	9.09e-42	80.9
Cannabis_sativa_AAE1_H9A1V3	CBDRX.chr9	47.727	88	42	4	131	216	39023743	39023486	9.09e-42	79.3
Cannabis_sativa_AAE1_H9A1V3	CBDRX.chr9	63.415	41	15	0	91	131	39023948	39023826	9.09e-42	55.5
Cannabis_sativa_AAE1_H9A1V3	CBDRX.chr9	50.962	104	49	1	357	458	38201299	38201610	3.65e-25	117
Cannabis_sativa_AAE1_H9A1V3	CBDRX.chr9	44	125	41	1	344	439	39021806	39021432	1.38e-24	115
Cannabis_sativa_AAE1_H9A1V3	CBDRX.chr9	33.778	225	73	2	438	586	39020498	39019824	1.28e-23	112
Cannabis_sativa_AAE1_H9A1V3	CBDRX.chr9	42.424	99	51	3	132	228	38199031	38199315	6.23e-23	78.6
Cannabis_sativa_AAE1_H9A1V3	CBDRX.chr9	51.064	47	23	0	91	137	38198792	38198932	6.23e-23	53.1
Cannabis_sativa_AAE1_H9A1V3	CBDRX.chr9	35.115	131	45	2	626	718	39019411	39019025	5.56e-20	79.3
Cannabis_sativa_AAE1_H9A1V3	CBDRX.chr9	59.375	32	13	0	582	613	39019620	39019525	5.56e-20	42.4
Cannabis_sativa_AAE1_H9A1V3	CBDRX.chr9	67.143	70	22	1	219	288	38199509	38199715	6.58e-16	87
Cannabis_sativa_AAE1_H9A1V3	CBDRX.chr9	46.316	95	47	1	451	545	38202253	38202525	2.62e-10	68.9
Cannabis_sativa_AAE1_H9A1V3	CBDRX.chr9	47.887	71	34	2	626	696	38203285	38203488	4.17e-10	68.2
Cannabis_sativa_AAE1_H9A1V3	CBDRX.chr9	43.137	51	27	1	423	471	38202071	38202223	0.00018	49.7
Cannabis_sativa_AAE1_H9A1V3	CBDRX.chr9	48.837	43	22	0	544	586	38202689	38202817	0.000394	48.5
Cannabis_sativa_AAE1_H9A1V3	CBDRX.chr9	47.059	51	23	1	299	345	39022423	39022271	0.003	45.8
Cannabis_sativa_AAE1_H9A1V3	CBDRX.chr9	55.882	34	15	0	580	613	38203044	38203145	0.02	43.1
Cannabis_sativa_AAE1_H9A1V3	CBDRX.chr9	55.556	36	16	0	299	334	38200544	38200651	0.025	42.7
Cannabis_sativa_AAE1_H9A1V3	CBDRX.chr9	50	30	13	1	689	718	38203632	38203715	9.7	34.3
Cannabis_sativa_AAE1_H9A1V3	CBDRX.chr5	24.907	269	161	10	219	471	2641369	2640638	1.77e-06	56.2
Cannabis_sativa_AAE1_H9A1V3	CBDRX.chr8	22.989	261	177	7	223	477	4758183	4757455	3.92e-05	52
Cannabis_sativa_AAE1_H9A1V3	CBDRX.chr8	36.538	52	32	1	165	216	56751108	56751260	0.24	32
Cannabis_sativa_AAE1_H9A1V3	CBDRX.chr8	24.762	105	49	1	223	297	56751379	56751693	0.24	25
Cannabis_sativa_AAE1_H9A1V3	CBDRX.chr6	23.774	265	181	8	219	477	3668383	3667634	0.016	43.5
Cannabis_sativa_AAE1_H9A1V3	CBDRX.chr6	31.496	127	73	6	360	477	3656671	3656306	0.16	40
Cannabis_sativa_AAE1_H9A1V3	CBDRX.chrX	20.701	314	226	7	174	477	71202710	71203612	3.1	35.8
Cannabis_sativa_AAE1_H9A1V3	CBDRX.chrX	20.673	208	146	5	247	453	260469	261038	7.6	34.7
Cannabis_sativa_AAE1_H9A1V3	CBDRX.chrX	20.673	208	146	5	247	453	184167	184736	9.7	34.3
Cannabis_sativa_GPPS_large_subunit_A0A1V0QSH4	CBDRX.chr4	99.746	393	1	0	1	393	83577022	83575844	0	776
Cannabis_sativa_GPPS_large_subunit_A0A1V0QSH4	CBDRX.chrX	41.15	226	113	6	173	391	12699559	12698921	8.47e-37	146
Cannabis_sativa_GPPS_large_subunit_A0A1V0QSH4	CBDRX.chrX	40.26	77	45	1	100	175	12700088	12699858	1.02e-11	71.2
Cannabis_sativa_GPPS_large_subunit_A0A1V0QSH4	CBDRX.chr6	30.942	223	143	3	101	314	42185545	42184883	3.79e-21	100
Cannabis_sativa_GPPS_large_subunit_A0A1V0QSH4	CBDRX.chr9	27.273	220	146	4	104	314	540107	540751	1.3e-16	86.7
Cannabis_sativa_GPPS_large_subunit_A0A1V0QSH4	CBDRX.chr1	37.624	101	63	0	265	365	88072468	88072166	1.59e-10	67.8
Cannabis_sativa_GPPS_large_subunit_A0A1V0QSH4	CBDRX.chr1	60.714	28	9	1	167	194	88073202	88073125	3.2	34.7
Cannabis_sativa_GPPS_large_subunit_A0A1V0QSH4	CBDRX.chr5	32.308	65	40	2	122	184	10771290	10771102	0.14	38.9
Cannabis_sativa_GPPS_small_subunit_A0A1V0QSG9	CBDRX.chr6	100	318	0	0	9	326	42185683	42184730	0	617
Cannabis_sativa_GPPS_small_subunit_A0A1V0QSG9	CBDRX.chr9	55.709	289	110	6	44	324	540050	540886	5.54e-83	278
Cannabis_sativa_GPPS_small_subunit_A0A1V0QSG9	CBDRX.chr5	43.701	254	116	3	53	293	10771360	10770641	5.68e-59	141
Cannabis_sativa_GPPS_small_subunit_A0A1V0QSG9	CBDRX.chr5	100	37	0	0	9	45	10771490	10771380	5.68e-59	79.3
Cannabis_sativa_GPPS_small_subunit_A0A1V0QSG9	CBDRX.chr5	61.905	42	16	0	285	326	10770666	10770541	5.68e-59	51.2
Cannabis_sativa_GPPS_small_subunit_A0A1V0QSG9	CBDRX.chr5	57.419	155	55	4	176	324	10770995	10770546	5.07e-38	148
Cannabis_sativa_GPPS_small_subunit_A0A1V0QSG9	CBDRX.chr4	31.364	220	140	3	58	275	83576713	83576081	1.01e-22	103
Cannabis_sativa_GPPS_small_subunit_A0A1V0QSG9	CBDRX.chrX	26.606	218	128	4	127	323	12699559	12698939	1.3e-06	54.7
Cannabis_sativa_GPPS_small_subunit_A0A1V0QSG9	CBDRX.chrX	29.592	98	59	3	36	129	12700133	12699858	0.001	45.4
Cannabis_sativa_OAC_I6WU39	CBDRX.chr9	100	59	0	0	43	101	4279643	4279467	5.75e-48	124
Cannabis_sativa_OAC_I6WU39	CBDRX.chr9	100	59	0	0	43	101	4271575	4271399	5.75e-48	124
Cannabis_sativa_OAC_I6WU39	CBDRX.chr9	100	42	0	0	1	42	4279869	4279744	5.75e-48	86.7
Cannabis_sativa_OAC_I6WU39	CBDRX.chr9	100	42	0	0	1	42	4271801	4271676	5.75e-48	86.7
Cannabis_sativa_OAC_I6WU39	CBDRX.chr9	34.559	136	48	2	3	97	5057933	5057526	7.39e-18	80.9
Cannabis_sativa_OAC_I6WU39	CBDRX.chr9	47.541	61	31	1	40	99	5062573	5062391	5.26e-15	57.4
Cannabis_sativa_OAC_I6WU39	CBDRX.chr9	45	40	22	0	3	42	5062794	5062675	5.26e-15	42.7
Cannabis_sativa_OAC_I6WU39	CBDRX.chr9	48.333	60	31	0	40	99	4251225	4251046	1.37e-13	68.9
Cannabis_sativa_OAC_I6WU39	CBDRX.chr9	42.5	40	23	0	3	42	4251493	4251374	2.87e-05	45.1
Cannabis_sativa_OAC_I6WU39	CBDRX.chr2	29.31	58	40	1	41	97	2038649	2038822	0.97	32.3
Cannabis_sativa_OAC_I6WU39	CBDRX.chr1	22.222	99	69	3	3	97	46877572	46877288	1.8	31.6
Cannabis_sativa_OAC_I6WU39	CBDRX.032	19.802	101	73	2	1	97	340314	340024	2	31.2
Cannabis_sativa_OAC_I6WU39	CBDRX.chr8	25	52	39	0	30	81	46066652	46066807	7.1	29.6
Cannabis_sativa_OLS_B1Q2B6	CBDRX.chr8	82.273	440	23	2	1	385	56879228	56877909	0	717
Cannabis_sativa_OLS_B1Q2B6	CBDRX.chr8	97.904	334	7	0	52	385	56862080	56863081	0	676
Cannabis_sativa_OLS_B1Q2B6	CBDRX.chr8	73.193	332	88	1	54	384	56896328	56897323	6.37e-160	501
Cannabis_sativa_OLS_B1Q2B6	CBDRX.chr8	72.449	98	27	0	284	381	57505512	57505219	8.73e-38	149
Cannabis_sativa_OLS_B1Q2B6	CBDRX.chr8	98.113	53	1	0	1	53	56861764	56861922	1.41e-26	116
Cannabis_sativa_OLS_B1Q2B6	CBDRX.chr8	65.306	49	17	0	5	53	56894107	56894253	2.76e-14	79.3
Cannabis_sativa_OLS_B1Q2B6	CBDRX.chr8	23.276	232	136	9	155	368	41883166	41882543	0.18	38.5
Cannabis_sativa_OLS_B1Q2B6	CBDRX.chrX	62.857	350	130	0	32	381	62817406	62816357	5.29e-151	476
Cannabis_sativa_OLS_B1Q2B6	CBDRX.chrX	34.593	344	206	3	56	381	15769177	15770205	5.54e-64	225
Cannabis_sativa_OLS_B1Q2B6	CBDRX.chrX	65.306	49	17	0	5	53	62818233	62818087	3.25e-14	79
Cannabis_sativa_OLS_B1Q2B6	CBDRX.chrX	21.633	245	152	10	155	368	102128854	102129561	0.000852	46.2
Cannabis_sativa_OLS_B1Q2B6	CBDRX.chrX	23.887	247	144	10	155	368	104216174	104215467	0.004	43.9
Cannabis_sativa_OLS_B1Q2B6	CBDRX.chrX	30.588	85	52	3	297	381	29964175	29964408	1.1	36.2
Cannabis_sativa_OLS_B1Q2B6	CBDRX.chrX	27.193	114	76	5	194	305	28149645	28149971	1.2	36.2
Cannabis_sativa_OLS_B1Q2B6	CBDRX.chr9	68.373	332	104	1	52	383	2162070	2163062	5.5e-149	470
Cannabis_sativa_OLS_B1Q2B6	CBDRX.chr9	70.979	286	82	1	98	383	33457247	33456393	5.1e-135	430
Cannabis_sativa_OLS_B1Q2B6	CBDRX.chr9	67.033	91	30	0	293	383	2126917	2126645	4.7e-36	134
Cannabis_sativa_OLS_B1Q2B6	CBDRX.chr9	77.273	22	5	0	272	293	2126979	2126914	4.7e-36	40.4
Cannabis_sativa_OLS_B1Q2B6	CBDRX.chr9	65.306	49	17	0	5	53	33457624	33457478	1.77e-24	80.1
Cannabis_sativa_OLS_B1Q2B6	CBDRX.chr9	50	58	29	0	54	111	33457380	33457207	1.77e-24	55.8
Cannabis_sativa_OLS_B1Q2B6	CBDRX.chr9	64.815	54	19	0	5	58	2161434	2161595	1.78e-16	85.9
Cannabis_sativa_OLS_B1Q2B6	CBDRX.chr9	34.722	72	42	2	297	368	32932800	32933000	0.08	39.7
Cannabis_sativa_OLS_B1Q2B6	CBDRX.chr1	52.978	319	142	5	54	368	32416644	32415700	2.49e-96	318
Cannabis_sativa_OLS_B1Q2B6	CBDRX.chr1	59.763	169	65	1	215	383	36877583	36877086	1.7e-66	206
Cannabis_sativa_OLS_B1Q2B6	CBDRX.chr1	48.913	92	31	5	127	210	36877848	36877597	1.7e-66	70.1
Cannabis_sativa_OLS_B1Q2B6	CBDRX.chr1	41.905	105	61	0	54	158	36878068	36877754	1.78e-17	89
Cannabis_sativa_OLS_B1Q2B6	CBDRX.chr1	50	44	22	0	10	53	32417039	32416908	5.17e-05	50.1
Cannabis_sativa_OLS_B1Q2B6	CBDRX.chr1	47.727	44	23	0	10	53	36878463	36878332	0.000141	48.5
Cannabis_sativa_OLS_B1Q2B6	CBDRX.chr1	23.077	247	146	9	155	368	84132681	84133388	0.018	42
Cannabis_sativa_OLS_B1Q2B6	CBDRX.chr1	21.012	257	163	8	143	368	59409713	59408970	0.035	40.8
Cannabis_sativa_OLS_B1Q2B6	CBDRX.chr1	21.012	257	163	8	143	368	59127787	59128530	0.035	40.8
Cannabis_sativa_OLS_B1Q2B6	CBDRX.chr1	40	50	29	1	336	385	32415796	32415650	0.18	38.5
Cannabis_sativa_OLS_B1Q2B6	CBDRX.chr1	26.606	109	74	3	258	360	22744726	22744400	1.5	35.8
Cannabis_sativa_OLS_B1Q2B6	CBDRX.chr3	40.798	326	184	4	56	381	74699737	74700687	1.66e-71	247
Cannabis_sativa_OLS_B1Q2B6	CBDRX.chr5	42.424	165	95	0	56	220	48745712	48746206	2.37e-60	138
Cannabis_sativa_OLS_B1Q2B6	CBDRX.chr5	40	155	86	2	227	381	48746220	48746663	2.37e-60	117
Cannabis_sativa_OLS_B1Q2B6	CBDRX.chr5	29.508	61	43	0	90	150	62974010	62974192	0.072	40
Cannabis_sativa_OLS_B1Q2B6	CBDRX.chr6	66.327	98	33	0	202	299	13719022	13719315	2.37e-38	151
Cannabis_sativa_OLS_B1Q2B6	CBDRX.chr6	19.549	266	169	8	141	368	62374884	62375660	0.004	43.9
Cannabis_sativa_OLS_B1Q2B6	CBDRX.chr6	33.333	72	43	2	297	368	62418231	62418431	0.023	41.6
Cannabis_sativa_OLS_B1Q2B6	CBDRX.chr6	26.087	138	93	5	234	368	27428978	27428583	0.023	41.6
Cannabis_sativa_OLS_B1Q2B6	CBDRX.chr6	33.333	72	43	2	297	368	26651847	26651647	0.093	39.7
Cannabis_sativa_OLS_B1Q2B6	CBDRX.chr2	21.154	260	165	11	141	368	38209062	38209817	0.004	43.9
Cannabis_sativa_OLS_B1Q2B6	CBDRX.chr2	30.435	69	43	2	297	360	91438242	91438448	5.5	33.9
Cannabis_sativa_OLS_B1Q2B6	CBDRX.chr4	31.944	72	44	2	297	368	1808001	1807801	0.014	42.4
Cannabis_sativa_PT4_A0A455ZJC3	CBDRX.chrX	100	77	0	0	172	248	62340663	62340893	4.04e-63	123
Cannabis_sativa_PT4_A0A455ZJC3	CBDRX.chrX	92.593	54	4	0	121	174	62340407	62340568	4.04e-63	108
Cannabis_sativa_PT4_A0A455ZJC3	CBDRX.chrX	75	32	8	0	241	272	62340985	62341080	4.04e-63	53.9
Cannabis_sativa_PT4_A0A455ZJC3	CBDRX.chrX	73.134	134	3	1	172	272	62268047	62268448	8.4e-62	152
Cannabis_sativa_PT4_A0A455ZJC3	CBDRX.chrX	92.593	54	4	0	121	174	62267791	62267952	8.4e-62	108
Cannabis_sativa_PT4_A0A455ZJC3	CBDRX.chrX	97.403	77	2	0	172	248	62200234	62200464	1.02e-52	121
Cannabis_sativa_PT4_A0A455ZJC3	CBDRX.chrX	92.593	54	4	0	121	174	62199978	62200139	1.02e-52	108
Cannabis_sativa_PT4_A0A455ZJC3	CBDRX.chrX	93.671	79	5	0	1	79	62197785	62198021	2.88e-40	157
Cannabis_sativa_PT4_A0A455ZJC3	CBDRX.chrX	93.671	79	5	0	1	79	62334344	62334580	3.72e-40	156
Cannabis_sativa_PT4_A0A455ZJC3	CBDRX.chrX	93.671	79	5	0	1	79	62265623	62265859	6.5e-40	155
Cannabis_sativa_PT4_A0A455ZJC3	CBDRX.chrX	47.429	175	33	4	1	122	62395691	62395185	1.02e-33	137
Cannabis_sativa_PT4_A0A455ZJC3	CBDRX.chrX	71.014	69	20	0	175	243	62393549	62393343	1.75e-30	90.1
Cannabis_sativa_PT4_A0A455ZJC3	CBDRX.chrX	62.745	51	19	0	124	174	62393785	62393633	1.75e-30	66.2
Cannabis_sativa_PT4_A0A455ZJC3	CBDRX.chrX	81.667	60	10	1	1	60	62388633	62388457	1.16e-21	102
Cannabis_sativa_PT4_A0A455ZJC3	CBDRX.chrX	97.826	46	1	0	77	122	62334889	62335026	3.09e-21	100
Cannabis_sativa_PT4_A0A455ZJC3	CBDRX.chrX	91.304	46	4	0	77	122	62266155	62266292	3.3e-20	97.4
Cannabis_sativa_PT4_A0A455ZJC3	CBDRX.chrX	89.13	46	5	0	77	122	62198351	62198488	9.36e-19	93.2
Cannabis_sativa_PT4_A0A455ZJC3	CBDRX.chrX	69.231	78	24	0	168	245	62384278	62384045	6.42e-18	90.5
Cannabis_sativa_PT4_A0A455ZJC3	CBDRX.chrX	88.889	27	3	0	372	398	62216822	62216902	2.84e-17	52.4
Cannabis_sativa_PT4_A0A455ZJC3	CBDRX.chrX	88.889	27	3	0	372	398	62348833	62348913	2.84e-17	52.4
Cannabis_sativa_PT4_A0A455ZJC3	CBDRX.chrX	72.222	36	9	1	329	364	62216463	62216567	2.84e-17	49.3
Cannabis_sativa_PT4_A0A455ZJC3	CBDRX.chrX	72.222	36	9	1	329	364	62348474	62348578	2.84e-17	49.3
Cannabis_sativa_PT4_A0A455ZJC3	CBDRX.chrX	83.333	18	1	1	359	374	62216683	62216736	2.84e-17	29.3
Cannabis_sativa_PT4_A0A455ZJC3	CBDRX.chrX	83.333	18	1	1	359	374	62348694	62348747	2.84e-17	29.3
Cannabis_sativa_PT4_A0A455ZJC3	CBDRX.chrX	95.238	42	2	0	302	343	62347703	62347828	4.4e-15	82
Cannabis_sativa_PT4_A0A455ZJC3	CBDRX.chrX	53.659	41	19	0	303	343	62382825	62382703	7.64e-15	53.5
Cannabis_sativa_PT4_A0A455ZJC3	CBDRX.chrX	50	40	20	0	265	304	62383031	62382912	7.64e-15	49.7
Cannabis_sativa_PT4_A0A455ZJC3	CBDRX.chrX	88.889	27	3	0	372	398	62277757	62277837	2.35e-14	52.4
Cannabis_sativa_PT4_A0A455ZJC3	CBDRX.chrX	39.785	93	9	2	329	375	62277399	62277674	2.35e-14	49.3
Cannabis_sativa_PT4_A0A455ZJC3	CBDRX.chrX	88.095	42	5	0	302	343	62215716	62215841	1.68e-12	73.9
Cannabis_sativa_PT4_A0A455ZJC3	CBDRX.chrX	47.778	90	43	1	172	257	62105311	62105580	3.61e-12	72.8
Cannabis_sativa_PT4_A0A455ZJC3	CBDRX.chrX	97.059	34	1	0	271	304	62347419	62347520	1.42e-11	70.9
Cannabis_sativa_PT4_A0A455ZJC3	CBDRX.chrX	54.054	74	33	1	172	244	24315502	24315281	3.54e-11	69.7
Cannabis_sativa_PT4_A0A455ZJC3	CBDRX.chrX	94.118	34	2	0	271	304	62215437	62215538	4.42e-11	69.3
Cannabis_sativa_PT4_A0A455ZJC3	CBDRX.chrX	40.909	44	26	0	302	345	62106102	62106233	3.05e-09	47.4
Cannabis_sativa_PT4_A0A455ZJC3	CBDRX.chrX	48.387	31	16	0	273	303	62105911	62106003	3.05e-09	36.6
Cannabis_sativa_PT4_A0A455ZJC3	CBDRX.chrX	40.476	42	25	0	303	344	24314024	24313899	1.42e-08	42.7
Cannabis_sativa_PT4_A0A455ZJC3	CBDRX.chrX	48.387	31	16	0	273	303	24314215	24314123	1.42e-08	38.9
Cannabis_sativa_PT4_A0A455ZJC3	CBDRX.chrX	56.863	51	22	0	122	172	62384823	62384671	1.73e-08	61.2
Cannabis_sativa_PT4_A0A455ZJC3	CBDRX.chrX	64.286	42	15	0	173	214	24267449	24267324	7.7e-08	59.3
Cannabis_sativa_PT4_A0A455ZJC3	CBDRX.chrX	54.762	42	19	0	303	344	62391641	62391516	1.5e-06	55.1
Cannabis_sativa_PT4_A0A455ZJC3	CBDRX.chrX	75	32	8	0	241	272	62204665	62204760	3.85e-06	53.9
Cannabis_sativa_PT4_A0A455ZJC3	CBDRX.chrX	55.769	52	22	1	258	309	62213392	62213544	4.23e-06	53.5
Cannabis_sativa_PT4_A0A455ZJC3	CBDRX.chrX	69.231	39	11	1	271	309	62210225	62210338	9.98e-06	52.4
Cannabis_sativa_PT4_A0A455ZJC3	CBDRX.chrX	69.231	39	11	1	271	309	62274383	62274496	9.98e-06	52.4
Cannabis_sativa_PT4_A0A455ZJC3	CBDRX.chrX	51.111	45	20	1	78	122	62388221	62388093	5.78e-05	50.1
Cannabis_sativa_PT4_A0A455ZJC3	CBDRX.chrX	71.429	21	6	0	302	322	62276659	62276721	0.000101	35.4
Cannabis_sativa_PT4_A0A455ZJC3	CBDRX.chrX	80.952	21	4	0	322	342	62276720	62276782	0.000101	32.7
Cannabis_sativa_PT4_A0A455ZJC3	CBDRX.chrX	30.252	119	47	3	90	172	62103984	62104340	0.000413	47.4
Cannabis_sativa_PT4_A0A455ZJC3	CBDRX.chrX	48.78	41	21	0	264	304	62391895	62391773	0.001	45.8
Cannabis_sativa_PT4_A0A455ZJC3	CBDRX.chrX	28.571	70	46	1	275	344	24264265	24264068	0.002	45.4
Cannabis_sativa_PT4_A0A455ZJC3	CBDRX.chrX	42.857	49	28	0	124	172	24276403	24276257	0.026	41.6
Cannabis_sativa_PT4_A0A455ZJC3	CBDRX.chrX	42.857	49	28	0	124	172	24316525	24316379	0.04	40.8
Cannabis_sativa_PT4_A0A455ZJC3	CBDRX.chrX	64	25	9	0	374	398	62390880	62390806	0.14	38.9
Cannabis_sativa_PT4_A0A455ZJC3	CBDRX.chrX	64	25	9	0	374	398	62381618	62381544	0.54	37.4
Cannabis_sativa_PT4_A0A455ZJC3	CBDRX.chrX	56.757	37	16	0	331	367	62391271	62391161	0.56	37.4
Cannabis_sativa_PT4_A0A455ZJC3	CBDRX.chrX	61.29	31	11	1	342	372	62381944	62381855	3.4	34.7
Cannabis_sativa_PT4_A0A455ZJC3	CBDRX.chr8	31.915	141	61	2	166	272	27596343	27596762	1.94e-07	57.8
Cannabis_sativa_PT4_A0A455ZJC3	CBDRX.chr8	34.043	94	33	1	303	367	27597391	27597672	1.03e-05	52.4
Cannabis_sativa_PT4_A0A455ZJC3	CBDRX.chr8	39.583	48	29	0	125	172	27595730	27595873	0.012	42.4
Cannabis_sativa_PT4_A0A455ZJC3	CBDRX.chr8	46.667	30	16	0	274	303	27597084	27597173	6.8	33.5
Cannabis_sativa_PT4_A0A455ZJC3	CBDRX.chr3	46.667	30	16	0	2	31	60941540	60941629	5.7	33.9
Cannabis_sativa_AAE1_H9A1V3	CBIO2.chr3	95.556	90	3	1	131	219	50354677	50354946	6.12e-99	178
Cannabis_sativa_AAE1_H9A1V3	CBIO2.chr3	100	68	0	0	218	285	50355060	50355263	6.12e-99	136
Cannabis_sativa_AAE1_H9A1V3	CBIO2.chr3	89.796	49	5	0	88	136	50354460	50354606	6.12e-99	92.8
Cannabis_sativa_AAE1_H9A1V3	CBIO2.chr3	54.802	177	36	5	88	223	50318764	50319285	2.29e-42	171
Cannabis_sativa_AAE1_H9A1V3	CBIO2.chr3	92.405	79	6	0	469	547	50359011	50359247	1.09e-40	122
Cannabis_sativa_AAE1_H9A1V3	CBIO2.chr3	89.474	38	4	0	434	471	50358790	50358903	1.09e-40	69.3
Cannabis_sativa_AAE1_H9A1V3	CBIO2.chr3	100	74	0	0	366	439	50358316	50358537	1.57e-37	156
Cannabis_sativa_AAE1_H9A1V3	CBIO2.chr3	90.476	84	3	2	531	613	50359370	50359609	4.67e-37	154
Cannabis_sativa_AAE1_H9A1V3	CBIO2.chr3	78.824	85	18	0	355	439	50322233	50322487	1.59e-33	143
Cannabis_sativa_AAE1_H9A1V3	CBIO2.chr3	91.892	74	2	1	626	699	50360328	50360537	3.31e-31	136
Cannabis_sativa_AAE1_H9A1V3	CBIO2.chr3	73.171	82	22	0	5	86	50317723	50317968	5.55e-31	135
Cannabis_sativa_AAE1_H9A1V3	CBIO2.chr3	85.714	70	10	0	544	613	50324002	50324211	4.37e-30	132
Cannabis_sativa_AAE1_H9A1V3	CBIO2.chr3	82.353	68	12	0	218	285	50320247	50320450	3.37e-23	110
Cannabis_sativa_AAE1_H9A1V3	CBIO2.chr3	72.308	65	18	0	626	690	50328510	50328704	7.6e-21	103
Cannabis_sativa_AAE1_H9A1V3	CBIO2.chr3	70.667	75	22	0	469	543	50323548	50323772	3.88e-18	94.4
Cannabis_sativa_AAE1_H9A1V3	CBIO2.chr3	91.837	49	4	0	293	341	50357176	50357322	7.88e-18	93.6
Cannabis_sativa_AAE1_H9A1V3	CBIO2.chr3	62.791	43	16	0	299	341	50320953	50321081	4.09e-10	62.8
Cannabis_sativa_AAE1_H9A1V3	CBIO2.chr3	66.667	15	5	0	284	298	50320795	50320839	4.09e-10	25.4
Cannabis_sativa_AAE1_H9A1V3	CBIO2.chr3	90.625	32	3	0	440	471	50323298	50323393	1.63e-09	66.2
Cannabis_sativa_AAE1_H9A1V3	CBIO2.chr3	100	31	0	0	690	720	50360694	50360786	2.14e-09	65.9
Cannabis_sativa_AAE1_H9A1V3	CBIO2.chr3	96.154	26	1	0	341	366	50357781	50357858	9.88e-07	57.4
Cannabis_sativa_AAE1_H9A1V3	CBIO2.chr3	75	32	8	0	689	720	50328880	50328975	1.63e-06	56.6
Cannabis_sativa_AAE1_H9A1V3	CBIO2.chr3	58.537	41	17	0	332	372	50321853	50321975	5.6e-05	51.6
Cannabis_sativa_AAE1_H9A1V3	CBIO2.chr3	21.695	295	194	11	188	471	52159538	52160344	0.018	43.1
Cannabis_sativa_AAE1_H9A1V3	CBIO2.chr3	100	17	0	0	71	87	50352245	50352295	0.046	42
Cannabis_sativa_AAE1_H9A1V3	CBIO2.chr9	61.429	70	26	1	219	288	44990684	44990478	6.82e-42	81.3
Cannabis_sativa_AAE1_H9A1V3	CBIO2.chr9	61.429	70	26	1	219	288	44898914	44898708	6.82e-42	81.3
Cannabis_sativa_AAE1_H9A1V3	CBIO2.chr9	47.727	88	42	4	131	216	44991028	44990771	6.82e-42	79.3
Cannabis_sativa_AAE1_H9A1V3	CBIO2.chr9	47.727	88	42	4	131	216	44899258	44899001	6.82e-42	79.3
Cannabis_sativa_AAE1_H9A1V3	CBIO2.chr9	63.415	41	15	0	91	131	44991233	44991111	6.82e-42	55.5
Cannabis_sativa_AAE1_H9A1V3	CBIO2.chr9	63.415	41	15	0	91	131	44899463	44899341	6.82e-42	55.5
Cannabis_sativa_AAE1_H9A1V3	CBIO2.chr9	50.962	104	49	1	357	458	43931203	43931514	3.81e-25	117
Cannabis_sativa_AAE1_H9A1V3	CBIO2.chr9	50.962	104	49	1	357	458	43979341	43979652	3.81e-25	117
Cannabis_sativa_AAE1_H9A1V3	CBIO2.chr9	44	125	41	1	344	439	44897320	44896946	1.44e-24	115
Cannabis_sativa_AAE1_H9A1V3	CBIO2.chr9	44	125	41	1	344	439	44989091	44988717	2.46e-24	114
Cannabis_sativa_AAE1_H9A1V3	CBIO2.chr9	33.628	226	74	2	437	586	44895973	44895296	2.19e-23	111
Cannabis_sativa_AAE1_H9A1V3	CBIO2.chr9	42.424	99	51	3	132	228	43977073	43977357	6.49e-23	78.6
Cannabis_sativa_AAE1_H9A1V3	CBIO2.chr9	51.064	47	23	0	91	137	43976834	43976974	6.49e-23	53.1
Cannabis_sativa_AAE1_H9A1V3	CBIO2.chr9	42.424	99	51	3	132	228	43928935	43929219	1.63e-22	77
Cannabis_sativa_AAE1_H9A1V3	CBIO2.chr9	51.064	47	23	0	91	137	43928696	43928836	1.63e-22	53.1
Cannabis_sativa_AAE1_H9A1V3	CBIO2.chr9	52.308	65	29	1	626	690	44976994	44976806	4.64e-21	73.2
Cannabis_sativa_AAE1_H9A1V3	CBIO2.chr9	59.375	32	13	0	582	613	44977203	44977108	4.64e-21	42.4
Cannabis_sativa_AAE1_H9A1V3	CBIO2.chr9	44.828	29	16	0	689	717	44976695	44976609	4.64e-21	29.6
Cannabis_sativa_AAE1_H9A1V3	CBIO2.chr9	52.308	65	29	1	626	690	44894884	44894696	5.72e-21	72.8
Cannabis_sativa_AAE1_H9A1V3	CBIO2.chr9	59.375	32	13	0	582	613	44895092	44894997	5.72e-21	42.4
Cannabis_sativa_AAE1_H9A1V3	CBIO2.chr9	44.828	29	16	0	689	717	44894585	44894499	5.72e-21	29.6
Cannabis_sativa_AAE1_H9A1V3	CBIO2.chr9	67.143	70	22	1	219	288	43929413	43929619	6.87e-16	87
Cannabis_sativa_AAE1_H9A1V3	CBIO2.chr9	67.143	70	22	1	219	288	43977551	43977757	6.87e-16	87
Cannabis_sativa_AAE1_H9A1V3	CBIO2.chr9	33.537	164	61	1	471	586	44977898	44977407	2.7e-13	78.6
Cannabis_sativa_AAE1_H9A1V3	CBIO2.chr9	46.316	95	47	1	451	545	43932157	43932429	2.73e-10	68.9
Cannabis_sativa_AAE1_H9A1V3	CBIO2.chr9	45.263	95	48	1	451	545	43980295	43980567	3.24e-10	68.6
Cannabis_sativa_AAE1_H9A1V3	CBIO2.chr9	47.887	71	34	2	626	696	43933189	43933392	4.35e-10	68.2
Cannabis_sativa_AAE1_H9A1V3	CBIO2.chr9	47.887	71	34	2	626	696	43981327	43981530	4.35e-10	68.2
Cannabis_sativa_AAE1_H9A1V3	CBIO2.chr9	57.143	35	15	0	437	471	44987685	44987581	0.000102	50.4
Cannabis_sativa_AAE1_H9A1V3	CBIO2.chr9	43.137	51	27	1	423	471	43931975	43932127	0.000188	49.7
Cannabis_sativa_AAE1_H9A1V3	CBIO2.chr9	43.137	51	27	1	423	471	43980113	43980265	0.000188	49.7
Cannabis_sativa_AAE1_H9A1V3	CBIO2.chr9	48.837	43	22	0	544	586	43932593	43932721	0.000412	48.5
Cannabis_sativa_AAE1_H9A1V3	CBIO2.chr9	48.837	43	22	0	544	586	43980731	43980859	0.000412	48.5
Cannabis_sativa_AAE1_H9A1V3	CBIO2.chr9	47.059	51	23	1	299	345	44897938	44897786	0.003	45.8
Cannabis_sativa_AAE1_H9A1V3	CBIO2.chr9	45.098	51	24	1	299	345	44989708	44989556	0.009	44.3
Cannabis_sativa_AAE1_H9A1V3	CBIO2.chr9	55.882	34	15	0	580	613	43932948	43933049	0.021	43.1
Cannabis_sativa_AAE1_H9A1V3	CBIO2.chr9	55.882	34	15	0	580	613	43981086	43981187	0.021	43.1
Cannabis_sativa_AAE1_H9A1V3	CBIO2.chr9	55.556	36	16	0	299	334	43930447	43930554	0.026	42.7
Cannabis_sativa_AAE1_H9A1V3	CBIO2.chr9	55.556	36	16	0	299	334	43978586	43978693	0.026	42.7
Cannabis_sativa_AAE1_H9A1V3	CBIO2.chr5	24.907	269	161	10	219	471	4913110	4912379	1.85e-06	56.2
Cannabis_sativa_AAE1_H9A1V3	CBIO2.chr5	24.907	269	161	10	219	471	4747844	4747113	1.85e-06	56.2
Cannabis_sativa_AAE1_H9A1V3	CBIO2.chr8	22.989	261	177	7	223	477	3031418	3030690	4.09e-05	52
Cannabis_sativa_AAE1_H9A1V3	CBIO2.chr8	22.989	261	177	7	223	477	3006866	3006138	4.09e-05	52
Cannabis_sativa_AAE1_H9A1V3	CBIO2.chr8	36.538	52	32	1	165	216	61600711	61600863	0.24	32
Cannabis_sativa_AAE1_H9A1V3	CBIO2.chr8	24.762	105	49	1	223	297	61600982	61601296	0.24	25
Cannabis_sativa_AAE1_H9A1V3	CBIO2.chr6	23.774	265	181	8	219	477	6692475	6691726	0.016	43.5
Cannabis_sativa_AAE1_H9A1V3	CBIO2.chr6	23.774	265	181	8	219	477	5970162	5969413	0.034	42.4
Cannabis_sativa_AAE1_H9A1V3	CBIO2.chr6	31.496	127	73	6	360	477	6669922	6669557	0.21	39.7
Cannabis_sativa_AAE1_H9A1V3	CBIO2.chr6	29.921	127	75	6	360	477	5957717	5957352	0.52	38.5
Cannabis_sativa_AAE1_H9A1V3	CBIO2.chrX	20.701	314	226	7	174	477	73238832	73239734	3.3	35.8
Cannabis_sativa_AAE1_H9A1V3	CBIO2.chrX	20.673	208	146	5	247	453	177321	177890	6.7	34.7
Cannabis_sativa_AAE1_H9A1V3	CBIO2.chrX	20.673	208	146	5	247	453	620962	621531	8	34.7
Cannabis_sativa_GPPS_large_subunit_A0A1V0QSH4	CBIO2.chr4	100	393	0	0	1	393	91128257	91127079	0	778
Cannabis_sativa_GPPS_large_subunit_A0A1V0QSH4	CBIO2.chrX	41.15	226	113	6	173	391	16093067	16093705	8.84e-37	146
Cannabis_sativa_GPPS_large_subunit_A0A1V0QSH4	CBIO2.chrX	41.15	226	113	6	173	391	17442209	17441571	8.84e-37	146
Cannabis_sativa_GPPS_large_subunit_A0A1V0QSH4	CBIO2.chrX	40.26	77	45	1	100	175	16092537	16092767	1.01e-11	71.6
Cannabis_sativa_GPPS_large_subunit_A0A1V0QSH4	CBIO2.chrX	40.26	77	45	1	100	175	17442738	17442508	1.06e-11	71.2
Cannabis_sativa_GPPS_large_subunit_A0A1V0QSH4	CBIO2.chr6	30.942	223	143	3	101	314	55928505	55927843	3.15e-21	100
Cannabis_sativa_GPPS_large_subunit_A0A1V0QSH4	CBIO2.chr9	27.727	220	145	4	104	314	876456	877100	2.72e-17	88.6
Cannabis_sativa_GPPS_large_subunit_A0A1V0QSH4	CBIO2.chr9	28.736	87	62	0	104	190	1378538	1378798	2.9e-15	56.6
Cannabis_sativa_GPPS_large_subunit_A0A1V0QSH4	CBIO2.chr9	30.682	88	57	1	231	314	1378920	1379183	2.9e-15	48.1
Cannabis_sativa_GPPS_large_subunit_A0A1V0QSH4	CBIO2.chr1	37.624	101	63	0	265	365	70715211	70714909	1.55e-10	67.8
Cannabis_sativa_GPPS_large_subunit_A0A1V0QSH4	CBIO2.chr1	37.624	101	63	0	265	365	71142401	71142099	1.66e-10	67.8
Cannabis_sativa_GPPS_large_subunit_A0A1V0QSH4	CBIO2.chr1	60.714	28	9	1	167	194	71143135	71143058	3.4	34.7
Cannabis_sativa_GPPS_large_subunit_A0A1V0QSH4	CBIO2.chr1	60.714	28	9	1	167	194	70715945	70715868	3.4	34.7
Cannabis_sativa_GPPS_small_subunit_A0A1V0QSG9	CBIO2.chr6	98.746	319	3	1	9	326	55928646	55927690	0	608
Cannabis_sativa_GPPS_small_subunit_A0A1V0QSG9	CBIO2.chr9	53.333	300	122	6	33	324	876366	877235	8.58e-83	277
Cannabis_sativa_GPPS_small_subunit_A0A1V0QSG9	CBIO2.chr9	63.768	138	42	2	44	176	1378481	1378885	3.77e-66	176
Cannabis_sativa_GPPS_small_subunit_A0A1V0QSG9	CBIO2.chr9	50.714	140	60	3	187	324	1378920	1379318	3.77e-66	98.6
Cannabis_sativa_GPPS_small_subunit_A0A1V0QSG9	CBIO2.chr4	31.364	220	140	3	58	275	91127948	91127316	1.06e-22	103
Cannabis_sativa_GPPS_small_subunit_A0A1V0QSG9	CBIO2.chrX	26.606	218	128	4	127	323	16093067	16093687	1.36e-06	54.7
Cannabis_sativa_GPPS_small_subunit_A0A1V0QSG9	CBIO2.chrX	26.606	218	128	4	127	323	17442209	17441589	1.36e-06	54.7
Cannabis_sativa_GPPS_small_subunit_A0A1V0QSG9	CBIO2.chrX	29.592	98	59	3	36	129	16092492	16092767	0.001	45.4
Cannabis_sativa_GPPS_small_subunit_A0A1V0QSG9	CBIO2.chrX	29.592	98	59	3	36	129	17442783	17442508	0.001	45.4
Cannabis_sativa_OAC_I6WU39	CBIO2.chr9	73.881	134	2	1	1	101	6855930	6855529	9.57e-56	189
Cannabis_sativa_OAC_I6WU39	CBIO2.chr9	71.852	135	4	1	1	101	5794029	5793625	2.39e-54	185
Cannabis_sativa_OAC_I6WU39	CBIO2.chr9	100	59	0	0	43	101	6860718	6860542	5.99e-48	124
Cannabis_sativa_OAC_I6WU39	CBIO2.chr9	100	42	0	0	1	42	6860942	6860817	5.99e-48	86.7
Cannabis_sativa_OAC_I6WU39	CBIO2.chr9	39.516	124	46	3	3	97	8572815	8572444	1.91e-19	85.5
Cannabis_sativa_OAC_I6WU39	CBIO2.chr9	34.559	136	48	2	3	97	8140619	8140212	8.5e-18	80.9
Cannabis_sativa_OAC_I6WU39	CBIO2.chr9	52.632	57	27	0	43	99	6864862	6864692	3.38e-16	65.9
Cannabis_sativa_OAC_I6WU39	CBIO2.chr9	48.485	33	17	0	10	42	6865076	6864978	3.38e-16	38.9
Cannabis_sativa_OAC_I6WU39	CBIO2.chr9	47.541	61	31	1	40	99	8145255	8145073	5.47e-15	57.4
Cannabis_sativa_OAC_I6WU39	CBIO2.chr9	45	40	22	0	3	42	8145472	8145353	5.47e-15	42.7
Cannabis_sativa_OAC_I6WU39	CBIO2.chr9	47.541	61	31	1	40	99	8577462	8577280	6.39e-15	57.4
Cannabis_sativa_OAC_I6WU39	CBIO2.chr9	45	40	22	0	3	42	8577671	8577552	6.39e-15	42.7
Cannabis_sativa_OAC_I6WU39	CBIO2.chr9	48.333	60	31	0	40	99	6828417	6828238	1.43e-13	68.9
Cannabis_sativa_OAC_I6WU39	CBIO2.chr9	48.333	60	31	0	40	99	5769029	5768850	1.57e-13	68.6
Cannabis_sativa_OAC_I6WU39	CBIO2.chr9	42.5	40	23	0	3	42	6828685	6828566	3e-05	45.1
Cannabis_sativa_OAC_I6WU39	CBIO2.chr9	42.5	40	23	0	3	42	5769297	5769178	3e-05	45.1
Cannabis_sativa_OAC_I6WU39	CBIO2.chr5	23.75	80	56	2	12	90	31856093	31856320	0.98	32.3
Cannabis_sativa_OAC_I6WU39	CBIO2.chr2	29.31	58	40	1	41	97	3336398	3336571	1	32.3
Cannabis_sativa_OAC_I6WU39	CBIO2.chr1	22.222	99	69	3	3	97	34222032	34221748	1.9	31.6
Cannabis_sativa_OAC_I6WU39	CBIO2.chr8	25	52	39	0	30	81	43812111	43812266	2.1	31.2
Cannabis_sativa_OAC_I6WU39	CBIO2.chr8	25	52	39	0	30	81	43867509	43867664	7.4	29.6
Cannabis_sativa_OLS_B1Q2B6	CBIO2.chr8	96.522	345	12	0	41	385	61706053	61707087	0	687
Cannabis_sativa_OLS_B1Q2B6	CBIO2.chr8	95.362	345	16	0	41	385	61728378	61727344	0	679
Cannabis_sativa_OLS_B1Q2B6	CBIO2.chr8	73.193	332	88	1	54	384	61741496	61742491	8.47e-160	501
Cannabis_sativa_OLS_B1Q2B6	CBIO2.chr8	74.49	98	25	0	284	381	62686695	62686402	1.21e-39	154
Cannabis_sativa_OLS_B1Q2B6	CBIO2.chr8	72.449	98	27	0	284	381	62768667	62768374	7.19e-38	149
Cannabis_sativa_OLS_B1Q2B6	CBIO2.chr8	98.113	53	1	0	1	53	61728659	61728501	8.42e-27	117
Cannabis_sativa_OLS_B1Q2B6	CBIO2.chr8	98.113	53	1	0	1	53	61705772	61705930	1.2e-26	116
Cannabis_sativa_OLS_B1Q2B6	CBIO2.chr8	65.306	49	17	0	5	53	61738551	61738697	6.52e-14	78.2
Cannabis_sativa_OLS_B1Q2B6	CBIO2.chrX	65.854	328	112	0	54	381	32723019	32724002	4.99e-150	473
Cannabis_sativa_OLS_B1Q2B6	CBIO2.chrX	71.154	156	45	0	226	381	66262815	66262348	7.25e-128	245
Cannabis_sativa_OLS_B1Q2B6	CBIO2.chrX	62.428	173	65	0	54	226	66263332	66262814	7.25e-128	235
Cannabis_sativa_OLS_B1Q2B6	CBIO2.chrX	34.593	344	206	3	56	381	22607166	22608194	6.12e-64	225
Cannabis_sativa_OLS_B1Q2B6	CBIO2.chrX	37.415	294	181	2	56	347	22666708	22667586	3.91e-59	211
Cannabis_sativa_OLS_B1Q2B6	CBIO2.chrX	65.306	49	17	0	5	53	32720566	32720712	3.33e-14	79
Cannabis_sativa_OLS_B1Q2B6	CBIO2.chrX	65.306	49	17	0	5	53	66265877	66265731	3.48e-14	79
Cannabis_sativa_OLS_B1Q2B6	CBIO2.chrX	21.633	245	152	10	155	368	102183749	102184456	0.000889	46.2
Cannabis_sativa_OLS_B1Q2B6	CBIO2.chrX	23.887	247	144	10	155	368	105363243	105362536	0.004	43.9
Cannabis_sativa_OLS_B1Q2B6	CBIO2.chrX	33.333	57	35	2	8	62	22606321	22606488	0.35	37.7
Cannabis_sativa_OLS_B1Q2B6	CBIO2.chrX	30.588	85	52	3	297	381	38592040	38592273	1.1	36.2
Cannabis_sativa_OLS_B1Q2B6	CBIO2.chrX	27.193	114	76	5	194	305	35968879	35969205	1.3	36.2
Cannabis_sativa_OLS_B1Q2B6	CBIO2.chr9	68.06	335	106	1	49	383	3374027	3373026	5.16e-149	470
Cannabis_sativa_OLS_B1Q2B6	CBIO2.chr9	68.889	225	66	1	164	384	38839985	38839311	3.75e-97	321
Cannabis_sativa_OLS_B1Q2B6	CBIO2.chr9	66.99	103	34	0	54	156	38840260	38839952	2.71e-50	142
Cannabis_sativa_OLS_B1Q2B6	CBIO2.chr9	65.306	49	17	0	5	53	38840504	38840358	2.71e-50	79.7
Cannabis_sativa_OLS_B1Q2B6	CBIO2.chr9	64.815	54	19	0	5	58	3374664	3374503	2.13e-16	85.9
Cannabis_sativa_OLS_B1Q2B6	CBIO2.chr9	34.722	72	42	2	297	368	38095627	38095827	0.088	39.7
Cannabis_sativa_OLS_B1Q2B6	CBIO2.chr9	34.722	72	42	2	297	368	37982298	37982498	0.1	39.7
Cannabis_sativa_OLS_B1Q2B6	CBIO2.chr1	56.757	333	139	3	54	383	25607352	25606360	5.48e-119	384
Cannabis_sativa_OLS_B1Q2B6	CBIO2.chr1	56.757	333	139	3	54	383	27159226	27158234	3.81e-118	381
Cannabis_sativa_OLS_B1Q2B6	CBIO2.chr1	50	44	22	0	10	53	25607747	25607616	5.4e-05	50.1
Cannabis_sativa_OLS_B1Q2B6	CBIO2.chr1	47.727	44	23	0	10	53	27159621	27159490	0.000147	48.5
Cannabis_sativa_OLS_B1Q2B6	CBIO2.chr1	23.077	247	146	9	155	368	64622807	64623514	0.019	42
Cannabis_sativa_OLS_B1Q2B6	CBIO2.chr1	23.077	247	146	9	155	368	64843200	64843907	0.019	42
Cannabis_sativa_OLS_B1Q2B6	CBIO2.chr1	26.606	109	74	3	258	360	19583797	19584123	1.6	35.8
Cannabis_sativa_OLS_B1Q2B6	CBIO2.chr1	26.606	109	74	3	258	360	17863581	17863907	2.1	35.4
Cannabis_sativa_OLS_B1Q2B6	CBIO2.chr5	36.01	411	217	5	8	381	34667670	34666465	1.12e-75	259
Cannabis_sativa_OLS_B1Q2B6	CBIO2.chr5	35.766	411	218	5	8	381	49921010	49922215	3.47e-75	258
Cannabis_sativa_OLS_B1Q2B6	CBIO2.chr2	21.154	260	165	11	141	368	37998507	37999262	0.004	43.9
Cannabis_sativa_OLS_B1Q2B6	CBIO2.chr2	21.012	257	163	8	143	368	29907888	29908631	0.039	40.8
Cannabis_sativa_OLS_B1Q2B6	CBIO2.chr2	30.588	85	52	3	297	381	44516269	44516036	0.091	39.7
Cannabis_sativa_OLS_B1Q2B6	CBIO2.chr2	59.259	27	11	0	146	172	32236053	32235973	5.2	33.9
Cannabis_sativa_OLS_B1Q2B6	CBIO2.chr2	30.435	69	43	2	297	360	98231757	98231963	5.7	33.9
Cannabis_sativa_OLS_B1Q2B6	CBIO2.chr2	32.143	56	37	1	297	351	97783463	97783630	5.9	33.9
Cannabis_sativa_OLS_B1Q2B6	CBIO2.chr6	19.549	266	169	8	141	368	77304504	77305280	0.005	43.9
Cannabis_sativa_OLS_B1Q2B6	CBIO2.chr6	33.333	72	43	2	297	368	77354921	77355121	0.024	41.6
Cannabis_sativa_OLS_B1Q2B6	CBIO2.chr6	26.087	138	93	5	234	368	37999960	37999565	0.025	41.6
Cannabis_sativa_OLS_B1Q2B6	CBIO2.chr4	31.944	72	44	2	297	368	2708250	2708050	0.014	42.4
Cannabis_sativa_OLS_B1Q2B6	CBIO2.chr4	33.333	57	36	1	286	340	3285840	3285670	0.41	37.7
Cannabis_sativa_OLS_B1Q2B6	CBIO2.chr7	21.012	257	163	8	143	368	77720825	77720082	0.037	40.8
Cannabis_sativa_PT4_A0A455ZJC3	CBIO2.chr7	100	77	0	0	172	248	67962103	67962333	1.93e-63	123
Cannabis_sativa_PT4_A0A455ZJC3	CBIO2.chr7	92.593	54	4	0	121	174	67961847	67962008	1.93e-63	108
Cannabis_sativa_PT4_A0A455ZJC3	CBIO2.chr7	78.125	32	7	0	241	272	67962425	67962520	1.93e-63	55.1
Cannabis_sativa_PT4_A0A455ZJC3	CBIO2.chr7	95.238	42	2	0	302	343	67971352	67971477	4.6e-15	82
Cannabis_sativa_PT4_A0A455ZJC3	CBIO2.chr7	97.059	34	1	0	271	304	67971068	67971169	1.49e-11	70.9
Cannabis_sativa_PT4_A0A455ZJC3	CBIO2.chr7	88.889	27	3	0	372	398	67972463	67972543	1.16e-05	52.4
Cannabis_sativa_PT4_A0A455ZJC3	CBIO2.chr7	72.222	36	9	1	329	364	67972105	67972209	0.000107	49.3
Cannabis_sativa_PT4_A0A455ZJC3	CBIO2.chrX	93.671	79	5	0	1	79	65735091	65735327	6.78e-40	155
Cannabis_sativa_PT4_A0A455ZJC3	CBIO2.chrX	51.852	162	51	1	109	243	65747598	65747113	9.2e-34	138
Cannabis_sativa_PT4_A0A455ZJC3	CBIO2.chrX	83.333	60	10	0	1	60	65749465	65749286	9.24e-24	108
Cannabis_sativa_PT4_A0A455ZJC3	CBIO2.chrX	81.667	60	10	1	1	60	65742393	65742217	1.29e-21	102
Cannabis_sativa_PT4_A0A455ZJC3	CBIO2.chrX	97.826	46	1	0	77	122	65735656	65735793	3.23e-21	100
Cannabis_sativa_PT4_A0A455ZJC3	CBIO2.chrX	47.778	90	43	1	172	257	65620669	65620938	6.36e-12	72
Cannabis_sativa_PT4_A0A455ZJC3	CBIO2.chrX	52.703	74	34	1	172	244	32599992	32599771	4.22e-11	69.7
Cannabis_sativa_PT4_A0A455ZJC3	CBIO2.chrX	45.349	86	46	1	173	257	32549584	32549327	1.35e-09	64.7
Cannabis_sativa_PT4_A0A455ZJC3	CBIO2.chrX	40.909	44	26	0	302	345	65621449	65621580	2.95e-09	47.4
Cannabis_sativa_PT4_A0A455ZJC3	CBIO2.chrX	48.387	31	16	0	273	303	65621259	65621351	2.95e-09	36.6
Cannabis_sativa_PT4_A0A455ZJC3	CBIO2.chrX	29.06	117	50	1	273	356	32598705	32598355	7.18e-08	59.3
Cannabis_sativa_PT4_A0A455ZJC3	CBIO2.chrX	54.762	42	19	0	303	344	65745400	65745275	1.3e-06	55.5
Cannabis_sativa_PT4_A0A455ZJC3	CBIO2.chrX	51.111	45	20	1	78	122	65741984	65741856	6.03e-05	50.1
Cannabis_sativa_PT4_A0A455ZJC3	CBIO2.chrX	40.351	57	34	0	248	304	65745716	65745546	8.52e-05	49.7
Cannabis_sativa_PT4_A0A455ZJC3	CBIO2.chrX	30.252	119	47	3	90	172	65619343	65619699	0.000431	47.4
Cannabis_sativa_PT4_A0A455ZJC3	CBIO2.chrX	31.481	54	37	0	291	344	32548408	32548247	0.004	44.3
Cannabis_sativa_PT4_A0A455ZJC3	CBIO2.chrX	68	25	8	0	98	122	65749032	65748958	0.059	40.4
Cannabis_sativa_PT4_A0A455ZJC3	CBIO2.chrX	40.385	52	31	0	121	172	32553143	32552988	0.17	38.9
Cannabis_sativa_PT4_A0A455ZJC3	CBIO2.chrX	24.167	120	50	2	91	169	32601230	32600871	0.18	38.9
Cannabis_sativa_PT4_A0A455ZJC3	CBIO2.chrX	56.757	37	16	0	331	367	65745030	65744920	0.58	37.4
Cannabis_sativa_PT4_A0A455ZJC3	CBIO2.chrX	60	25	10	0	374	398	65744639	65744565	1.6	35.8
Cannabis_sativa_PT4_A0A455ZJC3	CBIO2.chr8	41.25	80	46	1	166	245	23480602	23480838	5.83e-09	57
Cannabis_sativa_PT4_A0A455ZJC3	CBIO2.chr8	50	26	13	0	253	278	23480961	23481038	5.83e-09	26.2
Cannabis_sativa_PT4_A0A455ZJC3	CBIO2.chr8	31.915	141	61	2	166	272	23553357	23553776	2.03e-07	57.8
Cannabis_sativa_PT4_A0A455ZJC3	CBIO2.chr8	25.414	181	50	3	303	398	23554405	23554947	1.05e-05	52.4
Cannabis_sativa_PT4_A0A455ZJC3	CBIO2.chr8	34.043	94	33	1	303	367	23481677	23481958	1.35e-05	52
Cannabis_sativa_PT4_A0A455ZJC3	CBIO2.chr8	39.583	48	29	0	125	172	23479989	23480132	0.013	42.4
Cannabis_sativa_PT4_A0A455ZJC3	CBIO2.chr8	39.583	48	29	0	125	172	23552744	23552887	0.013	42.4
Cannabis_sativa_PT4_A0A455ZJC3	CBIO2.chr8	46.667	30	16	0	274	303	23481342	23481431	7.1	33.5
Cannabis_sativa_PT4_A0A455ZJC3	CBIO2.chr8	46.667	30	16	0	274	303	23554098	23554187	7.1	33.5
Cannabis_sativa_PT4_A0A455ZJC3	CBIO2.chr6	31.746	63	42	1	112	173	5055129	5055317	0.088	39.7
Cannabis_sativa_PT4_A0A455ZJC3	CBIO2.chr6	30.159	63	43	1	112	173	4618285	4618473	0.098	39.7
Cannabis_sativa_PT4_A0A455ZJC3	CBIO2.chr6	29.474	95	37	2	125	190	5044771	5045052	2.2	35.4
Cannabis_sativa_PT4_A0A455ZJC3	CBIO2.chr1	32.258	62	41	1	112	172	43259319	43259504	0.48	37.4
Cannabis_sativa_PT4_A0A455ZJC3	CBIO2.132	30.159	63	43	1	112	173	6974	7162	0.58	37.4
Cannabis_sativa_PT4_A0A455ZJC3	CBIO2.chr3	46.667	30	16	0	2	31	57144206	57144295	6	33.9
Cannabis_sativa_AAE1_H9A1V3	COFBa.chr3	97.753	89	2	0	131	219	48437565	48437299	1.66e-101	184
Cannabis_sativa_AAE1_H9A1V3	COFBa.chr3	97.183	71	2	0	218	288	48437185	48436973	1.66e-101	137
Cannabis_sativa_AAE1_H9A1V3	COFBa.chr3	91.837	49	4	0	88	136	48437782	48437636	1.66e-101	94
Cannabis_sativa_AAE1_H9A1V3	COFBa.chr3	96.667	90	2	1	131	219	48518512	48518243	3.15e-100	181
Cannabis_sativa_AAE1_H9A1V3	COFBa.chr3	97.143	70	2	0	218	287	48518142	48517933	3.15e-100	137
Cannabis_sativa_AAE1_H9A1V3	COFBa.chr3	89.796	49	5	0	88	136	48518727	48518581	3.15e-100	92.8
Cannabis_sativa_AAE1_H9A1V3	COFBa.chr3	70.918	196	3	3	472	613	48432516	48431929	2.7e-72	228
Cannabis_sativa_AAE1_H9A1V3	COFBa.chr3	81.395	43	8	0	429	471	48432761	48432633	2.7e-72	69.3
Cannabis_sativa_AAE1_H9A1V3	COFBa.chr3	100	87	0	0	1	87	48440588	48440328	2e-47	186
Cannabis_sativa_AAE1_H9A1V3	COFBa.chr3	96.552	87	3	0	1	87	48521161	48520901	8.44e-46	181
Cannabis_sativa_AAE1_H9A1V3	COFBa.chr3	54.237	177	37	5	88	223	48565697	48565176	2.23e-41	167
Cannabis_sativa_AAE1_H9A1V3	COFBa.chr3	92.405	79	6	0	469	547	48512984	48512748	9.39e-41	122
Cannabis_sativa_AAE1_H9A1V3	COFBa.chr3	89.474	38	4	0	434	471	48513205	48513092	9.39e-41	69.3
Cannabis_sativa_AAE1_H9A1V3	COFBa.chr3	100	74	0	0	366	439	48433210	48432989	1.34e-37	156
Cannabis_sativa_AAE1_H9A1V3	COFBa.chr3	90.476	84	3	2	531	613	48512625	48512386	4e-37	154
Cannabis_sativa_AAE1_H9A1V3	COFBa.chr3	98.649	74	1	0	366	439	48513679	48513458	5.76e-37	154
Cannabis_sativa_AAE1_H9A1V3	COFBa.chr3	78.824	85	18	0	355	439	48562233	48561979	1.36e-33	143
Cannabis_sativa_AAE1_H9A1V3	COFBa.chr3	93.243	74	1	1	626	699	48511667	48511458	1.91e-31	136
Cannabis_sativa_AAE1_H9A1V3	COFBa.chr3	93.243	74	1	1	626	699	48431207	48430998	1.91e-31	136
Cannabis_sativa_AAE1_H9A1V3	COFBa.chr3	71.951	82	23	0	5	86	48566756	48566511	2.22e-30	133
Cannabis_sativa_AAE1_H9A1V3	COFBa.chr3	85.714	70	10	0	544	613	48560425	48560216	3.74e-30	132
Cannabis_sativa_AAE1_H9A1V3	COFBa.chr3	82.353	68	12	0	218	285	48564215	48564012	2.89e-23	110
Cannabis_sativa_AAE1_H9A1V3	COFBa.chr3	73.846	65	17	0	626	690	48481449	48481255	2.47e-21	104
Cannabis_sativa_AAE1_H9A1V3	COFBa.chr3	72.308	65	18	0	626	690	48555937	48555743	6.51e-21	103
Cannabis_sativa_AAE1_H9A1V3	COFBa.chr3	69.333	75	23	0	469	543	48560879	48560655	3.03e-18	94.7
Cannabis_sativa_AAE1_H9A1V3	COFBa.chr3	91.837	49	4	0	293	341	48514848	48514702	6.75e-18	93.6
Cannabis_sativa_AAE1_H9A1V3	COFBa.chr3	91.837	49	4	0	293	341	48434357	48434211	6.75e-18	93.6
Cannabis_sativa_AAE1_H9A1V3	COFBa.chr3	62.791	43	16	0	299	341	48563514	48563386	2.53e-10	63.5
Cannabis_sativa_AAE1_H9A1V3	COFBa.chr3	66.667	15	5	0	284	298	48563666	48563622	2.53e-10	25.4
Cannabis_sativa_AAE1_H9A1V3	COFBa.chr3	90.625	32	3	0	440	471	48561129	48561034	1.4e-09	66.2
Cannabis_sativa_AAE1_H9A1V3	COFBa.chr3	100	31	0	0	690	720	48511301	48511209	1.84e-09	65.9
Cannabis_sativa_AAE1_H9A1V3	COFBa.chr3	100	31	0	0	690	720	48430839	48430747	1.84e-09	65.9
Cannabis_sativa_AAE1_H9A1V3	COFBa.chr3	96.154	26	1	0	341	366	48514216	48514139	8.99e-07	57
Cannabis_sativa_AAE1_H9A1V3	COFBa.chr3	96.154	26	1	0	341	366	48433743	48433666	8.99e-07	57
Cannabis_sativa_AAE1_H9A1V3	COFBa.chr3	75	32	8	0	689	720	48555567	48555472	1.4e-06	56.6
Cannabis_sativa_AAE1_H9A1V3	COFBa.chr3	75	32	8	0	689	720	48481079	48480984	1.4e-06	56.6
Cannabis_sativa_AAE1_H9A1V3	COFBa.chr3	58.537	41	17	0	332	372	48562613	48562491	4.76e-05	51.6
Cannabis_sativa_AAE1_H9A1V3	COFBa.chr3	21.017	295	196	11	188	471	17760571	17761377	0.038	42
Cannabis_sativa_AAE1_H9A1V3	COFBa.chr3	93.333	15	1	0	285	299	48434568	48434524	8.6	34.3
Cannabis_sativa_AAE1_H9A1V3	COFBa.chr9	55	80	35	1	219	298	28369682	28369918	8.14e-42	80.9
Cannabis_sativa_AAE1_H9A1V3	COFBa.chr9	47.727	88	42	4	131	216	28369338	28369595	8.14e-42	79.3
Cannabis_sativa_AAE1_H9A1V3	COFBa.chr9	63.415	41	15	0	91	131	28369133	28369255	8.14e-42	55.5
Cannabis_sativa_AAE1_H9A1V3	COFBa.chr9	50.962	104	49	1	357	458	28483650	28483961	3.27e-25	117
Cannabis_sativa_AAE1_H9A1V3	COFBa.chr9	44	125	41	1	344	439	28371276	28371650	1.23e-24	115
Cannabis_sativa_AAE1_H9A1V3	COFBa.chr9	33.778	225	73	2	438	586	28372626	28373300	1.27e-23	112
Cannabis_sativa_AAE1_H9A1V3	COFBa.chr9	42.424	99	51	3	132	228	28481382	28481666	5.58e-23	78.6
Cannabis_sativa_AAE1_H9A1V3	COFBa.chr9	51.064	47	23	0	91	137	28481143	28481283	5.58e-23	53.1
Cannabis_sativa_AAE1_H9A1V3	COFBa.chr9	51.562	64	29	1	627	690	28373716	28373901	1.02e-20	70.5
Cannabis_sativa_AAE1_H9A1V3	COFBa.chr9	59.375	32	13	0	582	613	28373504	28373599	1.02e-20	42.4
Cannabis_sativa_AAE1_H9A1V3	COFBa.chr9	48.276	29	15	0	689	717	28374012	28374098	1.02e-20	30.8
Cannabis_sativa_AAE1_H9A1V3	COFBa.chr9	67.143	70	22	1	219	288	28481860	28482066	5.89e-16	87
Cannabis_sativa_AAE1_H9A1V3	COFBa.chr9	46.316	95	47	1	451	545	28484604	28484876	2.34e-10	68.9
Cannabis_sativa_AAE1_H9A1V3	COFBa.chr9	47.887	71	34	2	626	696	28485637	28485840	3.73e-10	68.2
Cannabis_sativa_AAE1_H9A1V3	COFBa.chr9	43.137	51	27	1	423	471	28484422	28484574	0.000161	49.7
Cannabis_sativa_AAE1_H9A1V3	COFBa.chr9	48.837	43	22	0	544	586	28485041	28485169	0.000353	48.5
Cannabis_sativa_AAE1_H9A1V3	COFBa.chr9	47.059	51	23	1	299	345	28370658	28370810	0.002	45.8
Cannabis_sativa_AAE1_H9A1V3	COFBa.chr9	55.882	34	15	0	580	613	28485396	28485497	0.018	43.1
Cannabis_sativa_AAE1_H9A1V3	COFBa.chr9	55.556	36	16	0	299	334	28482895	28483002	0.022	42.7
Cannabis_sativa_AAE1_H9A1V3	COFBa.chr9	50	30	13	1	689	718	28485984	28486067	8.7	34.3
Cannabis_sativa_AAE1_H9A1V3	COFBa.chr5	24.907	269	161	10	219	471	2024229	2023498	1.58e-06	56.2
Cannabis_sativa_AAE1_H9A1V3	COFBa.chr8	22.989	261	177	7	223	477	18306357	18305629	4.19e-05	51.6
Cannabis_sativa_AAE1_H9A1V3	COFBa.chr8	36.538	52	32	1	165	216	49575526	49575678	0.18	32
Cannabis_sativa_AAE1_H9A1V3	COFBa.chr8	25	104	49	1	223	297	49575797	49576108	0.18	25.4
Cannabis_sativa_AAE1_H9A1V3	COFBa.chr6	23.774	265	181	8	219	477	74377852	74378601	0.015	43.1
Cannabis_sativa_AAE1_H9A1V3	COFBa.chr6	31.496	127	73	6	360	477	74394931	74395296	0.2	39.7
Cannabis_sativa_AAE1_H9A1V3	COFBa.chrX	20.701	314	226	7	174	477	67882576	67883478	2.8	35.8
Cannabis_sativa_AAE1_H9A1V3	COFBa.chrX	20.673	208	146	5	247	453	298535	299104	8.7	34.3
Cannabis_sativa_GPPS_large_subunit_A0A1V0QSH4	COFBa.chr4	99.746	393	1	0	1	393	75917673	75916495	0	776
Cannabis_sativa_GPPS_large_subunit_A0A1V0QSH4	COFBa.chrX	41.15	226	113	6	173	391	5248489	5247851	1.55e-36	145
Cannabis_sativa_GPPS_large_subunit_A0A1V0QSH4	COFBa.chrX	40.26	77	45	1	100	175	5249041	5248811	9.1e-12	71.2
Cannabis_sativa_GPPS_large_subunit_A0A1V0QSH4	COFBa.chr6	30.942	223	143	3	101	314	34266563	34265901	2.7e-21	100
Cannabis_sativa_GPPS_large_subunit_A0A1V0QSH4	COFBa.chr9	27.727	220	145	4	104	314	778615	779259	2.33e-17	88.6
Cannabis_sativa_GPPS_large_subunit_A0A1V0QSH4	COFBa.chr1	37.624	101	63	0	265	365	9841574	9841876	1.4e-10	67.8
Cannabis_sativa_GPPS_large_subunit_A0A1V0QSH4	COFBa.chr1	37.624	101	63	0	265	365	13980502	13980804	1.4e-10	67.8
Cannabis_sativa_GPPS_large_subunit_A0A1V0QSH4	COFBa.chr1	60.714	28	9	1	167	194	9840840	9840917	2.9	34.7
Cannabis_sativa_GPPS_large_subunit_A0A1V0QSH4	COFBa.chr1	60.714	28	9	1	167	194	13979768	13979845	2.9	34.7
Cannabis_sativa_GPPS_small_subunit_A0A1V0QSG9	COFBa.chr6	98.746	319	3	1	9	326	34266704	34265748	0	608
Cannabis_sativa_GPPS_small_subunit_A0A1V0QSG9	COFBa.chr9	53.333	300	122	6	33	324	778525	779394	7.36e-83	277
Cannabis_sativa_GPPS_small_subunit_A0A1V0QSG9	COFBa.chr4	31.364	220	140	3	58	275	75917364	75916732	9.06e-23	103
Cannabis_sativa_GPPS_small_subunit_A0A1V0QSG9	COFBa.chrX	27.523	218	126	5	127	323	5248489	5247869	2.18e-06	53.9
Cannabis_sativa_GPPS_small_subunit_A0A1V0QSG9	COFBa.chrX	29.592	98	59	3	36	129	5249086	5248811	0.001	45.4
Cannabis_sativa_OAC_I6WU39	COFBa.chr9	73.881	134	2	1	1	101	3992959	3992558	8.2e-56	189
Cannabis_sativa_OAC_I6WU39	COFBa.chr9	93.22	59	4	0	43	101	3997756	3997580	3.52e-46	119
Cannabis_sativa_OAC_I6WU39	COFBa.chr9	97.619	42	1	0	1	42	3997979	3997854	3.52e-46	85.9
Cannabis_sativa_OAC_I6WU39	COFBa.chr9	39.516	124	46	3	3	97	4786521	4786150	1.64e-19	85.5
Cannabis_sativa_OAC_I6WU39	COFBa.chr9	52.632	57	27	0	43	99	4001898	4001728	1.08e-18	65.5
Cannabis_sativa_OAC_I6WU39	COFBa.chr9	52.5	40	19	0	3	42	4002131	4002012	1.08e-18	47.4
Cannabis_sativa_OAC_I6WU39	COFBa.chr9	47.541	61	31	1	40	99	4791168	4790986	5.49e-15	57.4
Cannabis_sativa_OAC_I6WU39	COFBa.chr9	45	40	22	0	3	42	4791377	4791258	5.49e-15	42.7
Cannabis_sativa_OAC_I6WU39	COFBa.chr9	48.333	60	31	0	40	99	3965444	3965265	1.22e-13	68.9
Cannabis_sativa_OAC_I6WU39	COFBa.chr9	42.5	40	23	0	3	42	3965712	3965593	2.57e-05	45.1
Cannabis_sativa_OAC_I6WU39	COFBa.chr2	29.31	58	40	1	41	97	1835619	1835792	0.26	33.9
Cannabis_sativa_OAC_I6WU39	COFBa.chr1	19.802	101	73	2	1	97	32208401	32208111	2.1	31.2
Cannabis_sativa_OLS_B1Q2B6	COFBa.chr8	98.802	334	4	0	52	385	49710389	49711390	0	682
Cannabis_sativa_OLS_B1Q2B6	COFBa.chr8	98.503	334	5	0	52	385	49723568	49722567	0	680
Cannabis_sativa_OLS_B1Q2B6	COFBa.chr8	73.193	332	88	1	54	384	49750776	49751771	1.21e-159	500
Cannabis_sativa_OLS_B1Q2B6	COFBa.chr8	69.318	88	27	0	284	371	50499936	50499673	1.46e-28	122
Cannabis_sativa_OLS_B1Q2B6	COFBa.chr8	98.113	53	1	0	1	53	49710088	49710246	1.37e-26	116
Cannabis_sativa_OLS_B1Q2B6	COFBa.chr8	98.113	53	1	0	1	53	49723883	49723725	3.2e-26	115
Cannabis_sativa_OLS_B1Q2B6	COFBa.chr8	65.306	49	17	0	5	53	49743983	49744129	4.43e-14	78.6
Cannabis_sativa_OLS_B1Q2B6	COFBa.chr8	23.276	232	136	9	155	368	37157345	37156722	0.16	38.5
Cannabis_sativa_OLS_B1Q2B6	COFBa.chr8	65.217	23	8	0	359	381	50499722	50499654	5.3	33.9
Cannabis_sativa_OLS_B1Q2B6	COFBa.chrX	62.857	350	130	0	32	381	27406077	27407126	4.73e-151	476
Cannabis_sativa_OLS_B1Q2B6	COFBa.chrX	34.593	344	206	3	56	381	12100591	12101619	5.25e-64	225
Cannabis_sativa_OLS_B1Q2B6	COFBa.chrX	65.306	49	17	0	5	53	27405250	27405396	2.9e-14	79
Cannabis_sativa_OLS_B1Q2B6	COFBa.chrX	21.633	245	152	10	155	368	82229003	82229710	0.000762	46.2
Cannabis_sativa_OLS_B1Q2B6	COFBa.chrX	23.887	247	144	10	155	368	85136282	85136989	0.004	43.9
Cannabis_sativa_OLS_B1Q2B6	COFBa.chrX	30.588	85	52	3	297	381	17866395	17866628	0.91	36.2
Cannabis_sativa_OLS_B1Q2B6	COFBa.chrX	27.193	114	76	5	194	305	24365278	24365604	1.1	36.2
Cannabis_sativa_OLS_B1Q2B6	COFBa.chrX	27.193	114	76	5	194	305	29445114	29444788	1.3	35.8
Cannabis_sativa_OLS_B1Q2B6	COFBa.chr9	68.06	335	106	1	49	383	2213206	2212205	4.42e-149	470
Cannabis_sativa_OLS_B1Q2B6	COFBa.chr9	71.661	307	87	0	77	383	12996969	12997889	1.04e-147	466
Cannabis_sativa_OLS_B1Q2B6	COFBa.chr9	61.667	60	20	1	5	61	2213844	2213665	1.68e-16	85.9
Cannabis_sativa_OLS_B1Q2B6	COFBa.chr9	65.306	49	17	0	5	53	12996655	12996801	1.63e-14	79.7
Cannabis_sativa_OLS_B1Q2B6	COFBa.chr9	34.722	72	42	2	297	368	13577179	13576979	0.071	39.7
Cannabis_sativa_OLS_B1Q2B6	COFBa.chr1	56.757	333	139	3	54	383	54873248	54872256	4.7e-119	384
Cannabis_sativa_OLS_B1Q2B6	COFBa.chr1	50	44	22	0	10	53	54873643	54873512	4.63e-05	50.1
Cannabis_sativa_OLS_B1Q2B6	COFBa.chr1	23.077	247	146	9	155	368	19040068	19039361	0.016	42
Cannabis_sativa_OLS_B1Q2B6	COFBa.chr1	21.012	257	163	8	143	368	27981523	27982266	0.032	40.8
Cannabis_sativa_OLS_B1Q2B6	COFBa.chr1	26.606	109	74	3	258	360	58467836	58467510	1.8	35.4
Cannabis_sativa_OLS_B1Q2B6	COFBa.chr5	36.01	411	217	5	8	381	27253465	27254670	9.57e-76	259
Cannabis_sativa_OLS_B1Q2B6	COFBa.chr6	19.549	266	169	8	141	368	15885118	15884342	0.00027	47.8
Cannabis_sativa_OLS_B1Q2B6	COFBa.chr6	33.333	72	43	2	297	368	15828449	15828249	0.019	41.6
Cannabis_sativa_OLS_B1Q2B6	COFBa.chr6	30.588	85	52	3	297	381	40592292	40592525	0.078	39.7
Cannabis_sativa_OLS_B1Q2B6	COFBa.chr6	33.333	72	43	2	297	368	41356840	41357040	0.078	39.7
Cannabis_sativa_OLS_B1Q2B6	COFBa.chr2	21.705	258	164	11	141	368	56858111	56858860	0.001	45.4
Cannabis_sativa_OLS_B1Q2B6	COFBa.chr2	30.435	69	43	2	297	360	74563001	74563207	4.9	33.9
Cannabis_sativa_OLS_B1Q2B6	COFBa.chr4	31.944	72	44	2	297	368	2465239	2465039	0.013	42.4
Cannabis_sativa_PT4_A0A455ZJC3	COFBa.chrX	100	77	0	0	172	248	27893465	27893235	5.89e-63	122
Cannabis_sativa_PT4_A0A455ZJC3	COFBa.chrX	92.593	54	4	0	121	174	27893722	27893561	5.89e-63	108
Cannabis_sativa_PT4_A0A455ZJC3	COFBa.chrX	75	32	8	0	241	272	27893143	27893048	5.89e-63	53.9
Cannabis_sativa_PT4_A0A455ZJC3	COFBa.chrX	73.134	134	3	1	172	272	27964446	27964045	7.52e-62	152
Cannabis_sativa_PT4_A0A455ZJC3	COFBa.chrX	92.593	54	4	0	121	174	27964702	27964541	7.52e-62	108
Cannabis_sativa_PT4_A0A455ZJC3	COFBa.chrX	97.403	77	2	0	172	248	28032709	28032479	9.12e-53	121
Cannabis_sativa_PT4_A0A455ZJC3	COFBa.chrX	92.593	54	4	0	121	174	28032965	28032804	9.12e-53	108
Cannabis_sativa_PT4_A0A455ZJC3	COFBa.chrX	93.671	79	5	0	1	79	28035199	28034963	3.33e-40	156
Cannabis_sativa_PT4_A0A455ZJC3	COFBa.chrX	93.671	79	5	0	1	79	27897925	27897689	3.33e-40	156
Cannabis_sativa_PT4_A0A455ZJC3	COFBa.chrX	93.671	79	5	0	1	79	27966924	27966688	5.81e-40	155
Cannabis_sativa_PT4_A0A455ZJC3	COFBa.chrX	47.429	175	33	4	1	122	27838236	27838742	9.16e-34	137
Cannabis_sativa_PT4_A0A455ZJC3	COFBa.chrX	71.014	69	20	0	175	243	27840380	27840586	1.57e-30	90.1
Cannabis_sativa_PT4_A0A455ZJC3	COFBa.chrX	62.745	51	19	0	124	174	27840144	27840296	1.57e-30	66.2
Cannabis_sativa_PT4_A0A455ZJC3	COFBa.chrX	81.667	60	10	1	1	60	27845300	27845476	1.04e-21	102
Cannabis_sativa_PT4_A0A455ZJC3	COFBa.chrX	97.826	46	1	0	77	122	27897377	27897240	2.76e-21	100
Cannabis_sativa_PT4_A0A455ZJC3	COFBa.chrX	91.304	46	4	0	77	122	27966392	27966255	2.95e-20	97.4
Cannabis_sativa_PT4_A0A455ZJC3	COFBa.chrX	89.13	46	5	0	77	122	28034635	28034498	8.38e-19	93.2
Cannabis_sativa_PT4_A0A455ZJC3	COFBa.chrX	69.231	78	24	0	168	245	27849654	27849887	5.74e-18	90.5
Cannabis_sativa_PT4_A0A455ZJC3	COFBa.chrX	88.889	27	3	0	372	398	28016110	28016030	2.57e-17	52.4
Cannabis_sativa_PT4_A0A455ZJC3	COFBa.chrX	88.889	27	3	0	372	398	27954708	27954628	2.57e-17	52.4
Cannabis_sativa_PT4_A0A455ZJC3	COFBa.chrX	88.889	27	3	0	372	398	27885271	27885191	2.57e-17	52.4
Cannabis_sativa_PT4_A0A455ZJC3	COFBa.chrX	72.222	36	9	1	329	364	28016469	28016365	2.57e-17	49.3
Cannabis_sativa_PT4_A0A455ZJC3	COFBa.chrX	72.222	36	9	1	329	364	27955067	27954963	2.57e-17	49.3
Cannabis_sativa_PT4_A0A455ZJC3	COFBa.chrX	72.222	36	9	1	329	364	27885630	27885526	2.57e-17	49.3
Cannabis_sativa_PT4_A0A455ZJC3	COFBa.chrX	83.333	18	1	1	359	374	28016249	28016196	2.57e-17	29.3
Cannabis_sativa_PT4_A0A455ZJC3	COFBa.chrX	83.333	18	1	1	359	374	27954847	27954794	2.57e-17	29.3
Cannabis_sativa_PT4_A0A455ZJC3	COFBa.chrX	83.333	18	1	1	359	374	27885410	27885357	2.57e-17	29.3
Cannabis_sativa_PT4_A0A455ZJC3	COFBa.chrX	95.238	42	2	0	302	343	27886403	27886278	3.94e-15	82
Cannabis_sativa_PT4_A0A455ZJC3	COFBa.chrX	53.659	41	19	0	303	343	27851107	27851229	6.87e-15	53.5
Cannabis_sativa_PT4_A0A455ZJC3	COFBa.chrX	50	40	20	0	265	304	27850901	27851020	6.87e-15	49.7
Cannabis_sativa_PT4_A0A455ZJC3	COFBa.chrX	88.095	42	5	0	302	343	28017216	28017091	1.51e-12	73.9
Cannabis_sativa_PT4_A0A455ZJC3	COFBa.chrX	88.095	42	5	0	302	343	27955814	27955689	1.51e-12	73.9
Cannabis_sativa_PT4_A0A455ZJC3	COFBa.chrX	47.778	90	43	1	172	257	28127859	28127590	3.23e-12	72.8
Cannabis_sativa_PT4_A0A455ZJC3	COFBa.chrX	97.059	34	1	0	271	304	27886687	27886586	1.28e-11	70.9
Cannabis_sativa_PT4_A0A455ZJC3	COFBa.chrX	54.054	74	33	1	172	244	19060734	19060513	3.17e-11	69.7
Cannabis_sativa_PT4_A0A455ZJC3	COFBa.chrX	94.118	34	2	0	271	304	28017495	28017394	3.95e-11	69.3
Cannabis_sativa_PT4_A0A455ZJC3	COFBa.chrX	94.118	34	2	0	271	304	27956093	27955992	3.95e-11	69.3
Cannabis_sativa_PT4_A0A455ZJC3	COFBa.chrX	40.909	44	26	0	302	345	28127068	28126937	2.75e-09	47.4
Cannabis_sativa_PT4_A0A455ZJC3	COFBa.chrX	48.387	31	16	0	273	303	28127259	28127167	2.75e-09	36.6
Cannabis_sativa_PT4_A0A455ZJC3	COFBa.chrX	40.476	42	25	0	303	344	19059255	19059130	1.02e-08	42.7
Cannabis_sativa_PT4_A0A455ZJC3	COFBa.chrX	48.387	31	16	0	273	303	19059446	19059354	1.02e-08	39.3
Cannabis_sativa_PT4_A0A455ZJC3	COFBa.chrX	56.863	51	22	0	122	172	27849109	27849261	1.55e-08	61.2
Cannabis_sativa_PT4_A0A455ZJC3	COFBa.chrX	64.286	42	15	0	173	214	19002566	19002441	6.89e-08	59.3
Cannabis_sativa_PT4_A0A455ZJC3	COFBa.chrX	54.762	42	19	0	303	344	27842288	27842413	1.34e-06	55.1
Cannabis_sativa_PT4_A0A455ZJC3	COFBa.chrX	75	32	8	0	241	272	28028271	28028176	3.44e-06	53.9
Cannabis_sativa_PT4_A0A455ZJC3	COFBa.chrX	55.769	52	22	1	258	309	28019540	28019388	3.79e-06	53.5
Cannabis_sativa_PT4_A0A455ZJC3	COFBa.chrX	69.231	39	11	1	271	309	28022713	28022600	8.93e-06	52.4
Cannabis_sativa_PT4_A0A455ZJC3	COFBa.chrX	69.231	39	11	1	271	309	27958104	27957991	8.93e-06	52.4
Cannabis_sativa_PT4_A0A455ZJC3	COFBa.chrX	51.111	45	20	1	78	122	27845712	27845840	5.17e-05	50.1
Cannabis_sativa_PT4_A0A455ZJC3	COFBa.chrX	30.252	119	47	3	90	172	28129186	28128830	0.00037	47.4
Cannabis_sativa_PT4_A0A455ZJC3	COFBa.chrX	48.78	41	21	0	264	304	27842034	27842156	0.001	45.8
Cannabis_sativa_PT4_A0A455ZJC3	COFBa.chrX	28.571	70	46	1	275	344	18999382	18999185	0.001	45.4
Cannabis_sativa_PT4_A0A455ZJC3	COFBa.chrX	42.308	52	30	0	121	172	19011541	19011386	0.015	42
Cannabis_sativa_PT4_A0A455ZJC3	COFBa.chrX	42.857	49	28	0	124	172	19061755	19061609	0.028	41.2
Cannabis_sativa_PT4_A0A455ZJC3	COFBa.chrX	64	25	9	0	374	398	27843053	27843127	0.17	38.9
Cannabis_sativa_PT4_A0A455ZJC3	COFBa.chrX	64	25	9	0	374	398	27852314	27852388	0.48	37.4
Cannabis_sativa_PT4_A0A455ZJC3	COFBa.chrX	56.757	37	16	0	331	367	27842658	27842768	0.5	37.4
Cannabis_sativa_PT4_A0A455ZJC3	COFBa.chrX	61.29	31	11	1	342	372	27851988	27852077	3.1	34.7
Cannabis_sativa_PT4_A0A455ZJC3	COFBa.chr8	41.25	80	46	1	166	245	22863631	22863867	5.06e-09	57
Cannabis_sativa_PT4_A0A455ZJC3	COFBa.chr8	50	26	13	0	253	278	22863990	22864067	5.06e-09	26.2
Cannabis_sativa_PT4_A0A455ZJC3	COFBa.chr8	34.043	94	33	1	303	367	22864706	22864987	1.16e-05	52
Cannabis_sativa_PT4_A0A455ZJC3	COFBa.chr8	39.583	48	29	0	125	172	22863018	22863161	0.011	42.4
Cannabis_sativa_PT4_A0A455ZJC3	COFBa.chr8	46.667	30	16	0	274	303	22864371	22864460	6.1	33.5
Cannabis_sativa_PT4_A0A455ZJC3	COFBa.chr8	34.211	76	49	1	172	247	22841313	22841537	6.5	33.5
Cannabis_sativa_PT4_A0A455ZJC3	COFBa.chr6	30.159	63	43	1	112	173	75350819	75350631	0.084	39.7
Cannabis_sativa_PT4_A0A455ZJC3	COFBa.chr4	28.571	63	44	1	112	173	26217889	26217701	0.27	38.1
Cannabis_sativa_AAE1_H9A1V3	COFBb.chr3	80.124	161	3	2	88	219	46833057	46832575	2.41e-99	250
Cannabis_sativa_AAE1_H9A1V3	COFBb.chr3	95.775	71	3	0	218	288	46832461	46832249	2.41e-99	137
Cannabis_sativa_AAE1_H9A1V3	COFBb.chr3	96.552	87	3	0	1	87	46835421	46835161	6.52e-45	178
Cannabis_sativa_AAE1_H9A1V3	COFBb.chr3	70.199	151	8	1	434	547	46828486	46828034	8.95e-42	169
Cannabis_sativa_AAE1_H9A1V3	COFBb.chr3	53.977	176	38	5	88	223	46892745	46892227	8.5e-41	166
Cannabis_sativa_AAE1_H9A1V3	COFBb.chr3	100	74	0	0	366	439	46828959	46828738	1.32e-37	156
Cannabis_sativa_AAE1_H9A1V3	COFBb.chr3	90.476	84	3	2	531	613	46827911	46827672	3.94e-37	154
Cannabis_sativa_AAE1_H9A1V3	COFBb.chr3	78.824	85	18	0	355	439	46889224	46888970	1.29e-33	143
Cannabis_sativa_AAE1_H9A1V3	COFBb.chr3	93.243	74	1	1	626	699	46826951	46826742	1.88e-31	136
Cannabis_sativa_AAE1_H9A1V3	COFBb.chr3	73.171	82	22	0	5	86	46893836	46893591	9.33e-31	134
Cannabis_sativa_AAE1_H9A1V3	COFBb.chr3	85.714	70	10	0	544	613	46887418	46887209	3.68e-30	132
Cannabis_sativa_AAE1_H9A1V3	COFBb.chr3	82.353	68	12	0	218	285	46891264	46891061	2.84e-23	110
Cannabis_sativa_AAE1_H9A1V3	COFBb.chr3	73.846	65	17	0	626	690	46883270	46883076	1.17e-21	105
Cannabis_sativa_AAE1_H9A1V3	COFBb.chr3	70.667	75	22	0	469	543	46887872	46887648	1.84e-18	95.1
Cannabis_sativa_AAE1_H9A1V3	COFBb.chr3	91.837	49	4	0	293	341	46830083	46829937	6.64e-18	93.6
Cannabis_sativa_AAE1_H9A1V3	COFBb.chr3	62.791	43	16	0	299	341	46890558	46890430	2.8e-10	62.8
Cannabis_sativa_AAE1_H9A1V3	COFBb.chr3	66.667	15	5	0	284	298	46890716	46890672	2.8e-10	25.4
Cannabis_sativa_AAE1_H9A1V3	COFBb.chr3	90.625	32	3	0	440	471	46888122	46888027	1.38e-09	66.2
Cannabis_sativa_AAE1_H9A1V3	COFBb.chr3	100	31	0	0	690	720	46826584	46826492	1.81e-09	65.9
Cannabis_sativa_AAE1_H9A1V3	COFBb.chr3	63.043	46	6	1	332	366	46829554	46829417	7.91e-07	57.4
Cannabis_sativa_AAE1_H9A1V3	COFBb.chr3	75	32	8	0	689	720	46882900	46882805	1.37e-06	56.6
Cannabis_sativa_AAE1_H9A1V3	COFBb.chr3	43.548	62	34	1	332	393	46889604	46889422	3.95e-05	51.6
Cannabis_sativa_AAE1_H9A1V3	COFBb.chr3	21.356	295	195	11	188	471	17496747	17497553	0.019	42.7
Cannabis_sativa_AAE1_H9A1V3	COFBb.chr3	100	14	0	0	285	298	46830288	46830247	8.1	34.3
Cannabis_sativa_AAE1_H9A1V3	COFBb.chr9	61.429	70	26	1	219	288	37840345	37840139	5.76e-42	81.3
Cannabis_sativa_AAE1_H9A1V3	COFBb.chr9	47.727	88	42	4	131	216	37840689	37840432	5.76e-42	79.3
Cannabis_sativa_AAE1_H9A1V3	COFBb.chr9	63.415	41	15	0	91	131	37840894	37840772	5.76e-42	55.5
Cannabis_sativa_AAE1_H9A1V3	COFBb.chr9	50.962	104	49	1	357	458	37591545	37591234	3.21e-25	117
Cannabis_sativa_AAE1_H9A1V3	COFBb.chr9	44	125	41	1	344	439	37838752	37838378	2.07e-24	114
Cannabis_sativa_AAE1_H9A1V3	COFBb.chr9	42.424	99	51	3	132	228	37593813	37593529	5.48e-23	78.6
Cannabis_sativa_AAE1_H9A1V3	COFBb.chr9	51.064	47	23	0	91	137	37594052	37593912	5.48e-23	53.1
Cannabis_sativa_AAE1_H9A1V3	COFBb.chr9	52.308	65	29	1	626	690	37826655	37826467	3.92e-21	73.2
Cannabis_sativa_AAE1_H9A1V3	COFBb.chr9	59.375	32	13	0	582	613	37826864	37826769	3.92e-21	42.4
Cannabis_sativa_AAE1_H9A1V3	COFBb.chr9	44.828	29	16	0	689	717	37826356	37826270	3.92e-21	29.6
Cannabis_sativa_AAE1_H9A1V3	COFBb.chr9	67.143	70	22	1	219	288	37593335	37593129	5.79e-16	87
Cannabis_sativa_AAE1_H9A1V3	COFBb.chr9	33.537	164	61	1	471	586	37827559	37827068	2.27e-13	78.6
Cannabis_sativa_AAE1_H9A1V3	COFBb.chr9	45.263	95	48	1	451	545	37590591	37590319	2.73e-10	68.6
Cannabis_sativa_AAE1_H9A1V3	COFBb.chr9	47.887	71	34	2	626	696	37589559	37589356	3.67e-10	68.2
Cannabis_sativa_AAE1_H9A1V3	COFBb.chr9	57.143	35	15	0	437	471	37837346	37837242	8.59e-05	50.4
Cannabis_sativa_AAE1_H9A1V3	COFBb.chr9	43.137	51	27	1	423	471	37590773	37590621	0.000158	49.7
Cannabis_sativa_AAE1_H9A1V3	COFBb.chr9	48.837	43	22	0	544	586	37590155	37590027	0.000347	48.5
Cannabis_sativa_AAE1_H9A1V3	COFBb.chr9	45.098	51	24	1	299	345	37839369	37839217	0.008	44.3
Cannabis_sativa_AAE1_H9A1V3	COFBb.chr9	55.882	34	15	0	580	613	37589800	37589699	0.018	43.1
Cannabis_sativa_AAE1_H9A1V3	COFBb.chr9	55.556	36	16	0	299	334	37592300	37592193	0.022	42.7
Cannabis_sativa_AAE1_H9A1V3	COFBb.chr9	50	30	13	1	689	718	37589212	37589129	8.6	34.3
Cannabis_sativa_AAE1_H9A1V3	COFBb.chr5	24.907	269	161	10	219	471	3748664	3747933	1.56e-06	56.2
Cannabis_sativa_AAE1_H9A1V3	COFBb.chr5	21.362	323	216	8	170	475	47695512	47696417	0.25	39.3
Cannabis_sativa_AAE1_H9A1V3	COFBb.chr8	22.989	261	177	7	223	477	37062614	37063342	3.45e-05	52
Cannabis_sativa_AAE1_H9A1V3	COFBb.chr8	23.569	297	188	10	199	485	4721062	4721865	0.004	45.1
Cannabis_sativa_AAE1_H9A1V3	COFBb.chr8	36.538	52	32	1	165	216	6065282	6065130	0.21	32
Cannabis_sativa_AAE1_H9A1V3	COFBb.chr8	24.762	105	49	1	223	297	6065011	6064697	0.21	25
Cannabis_sativa_AAE1_H9A1V3	COFBb.chr6	23.774	265	181	8	219	477	4295521	4294772	0.015	43.1
Cannabis_sativa_AAE1_H9A1V3	COFBb.chr6	31.496	127	73	6	360	477	4278442	4278077	0.2	39.7
Cannabis_sativa_AAE1_H9A1V3	COFBb.chrX	20.701	314	226	7	174	477	66461097	66461999	2.7	35.8
Cannabis_sativa_AAE1_H9A1V3	COFBb.chrX	20.673	208	146	5	247	453	157272	157841	5.6	34.7
Cannabis_sativa_GPPS_large_subunit_A0A1V0QSH4	COFBb.chr4	99.746	393	1	0	1	393	74786230	74785052	0	776
Cannabis_sativa_GPPS_large_subunit_A0A1V0QSH4	COFBb.chrX	41.15	226	113	6	173	391	5098963	5098325	7.45e-37	146
Cannabis_sativa_GPPS_large_subunit_A0A1V0QSH4	COFBb.chrX	40.26	77	45	1	100	175	5099492	5099262	8.95e-12	71.2
Cannabis_sativa_GPPS_large_subunit_A0A1V0QSH4	COFBb.chr6	30.493	223	144	3	101	314	42761516	42762178	4.43e-21	100
Cannabis_sativa_GPPS_large_subunit_A0A1V0QSH4	COFBb.chr9	27.273	220	146	4	104	314	65549421	65548777	1.15e-16	86.7
Cannabis_sativa_GPPS_large_subunit_A0A1V0QSH4	COFBb.chr1	37.624	101	63	0	265	365	56028318	56028016	1.38e-10	67.8
Cannabis_sativa_GPPS_large_subunit_A0A1V0QSH4	COFBb.chr1	60.714	28	9	1	167	194	56029052	56028975	2.8	34.7
Cannabis_sativa_GPPS_large_subunit_A0A1V0QSH4	COFBb.chr7	66.667	42	14	0	48	89	55242161	55242036	7.16e-08	58.9
Cannabis_sativa_GPPS_small_subunit_A0A1V0QSG9	COFBb.chr6	97.484	318	8	0	9	326	42761378	42762331	0	603
Cannabis_sativa_GPPS_small_subunit_A0A1V0QSG9	COFBb.chr9	55.709	289	110	6	44	324	65549478	65548642	4.87e-83	278
Cannabis_sativa_GPPS_small_subunit_A0A1V0QSG9	COFBb.chr4	31.364	220	140	3	58	275	74785921	74785289	8.9e-23	103
Cannabis_sativa_GPPS_small_subunit_A0A1V0QSG9	COFBb.chrX	26.606	218	128	4	127	323	5098963	5098343	1.15e-06	54.7
Cannabis_sativa_GPPS_small_subunit_A0A1V0QSG9	COFBb.chrX	29.592	98	59	3	36	129	5099537	5099262	0.001	45.4
Cannabis_sativa_OAC_I6WU39	COFBb.chr9	100	59	0	0	43	101	62319774	62319950	5.05e-48	124
Cannabis_sativa_OAC_I6WU39	COFBb.chr9	100	42	0	0	1	42	62319548	62319673	5.05e-48	86.7
Cannabis_sativa_OAC_I6WU39	COFBb.chr9	34.559	136	48	2	3	97	61497862	61498269	6.5e-18	80.9
Cannabis_sativa_OAC_I6WU39	COFBb.chr9	33.333	135	53	2	2	99	61492991	61493395	6.99e-16	75.1
[truncated: 5,384 more rows]

## Sheet: Figure4c_synthase_counts
	query	target	pident	length	mismatch	gaps	qstart	qend	tstart	tend	evalue	bitscore	start	end	down	up	type	direction
0	THCAS	79X.00003908	91.4	1628	135	5	1	1627	7653378	7655001	0	2226	7653378	7655001	155022	150129	Partial	+
1	CBDAS	79X.00003908	91.376	1635	138	1	1	1635	7804714	7803083	0	2235	7803083	7804714	304727	416	Partial	-
2	CBDAS	79X.00003908	92.427	1611	122	0	25	1635	7856139	7854529	0	2300	7854529	7856139	26030	433	Partial	-
3	CBDAS	79X.00003908	89.744	1638	159	3	1	1635	7856157	7854526	0	2085	7854526	7856157	26027	415	Partial	-
4	CBDAS	79X.00003908	92.171	1635	128	0	1	1635	7892542	7890908	0	2311	7890908	7892542	22233	417	Partial	-
5	CBDAS	79X.00003908	91.865	1635	133	0	1	1635	7945079	7943445	0	2283	7943445	7945079	25886	416	Partial	-
6	THCAS	79X.00003908	99.939	1635	1	0	1	1635	8636863	8635229	0	3014	8635229	8636863	86507	83722	Full	-
7	CBDAS	79X.00003908	93.887	867	44	4	1	863	8758636	8759497	0	1299	8758636	8759497	8344	33799	Partial	+
8	CBDAS	79X.00003908	94.065	775	45	1	858	1632	8768960	8769733	0	1175	8768960	8769733	18668	23563	Partial	+
9	CBDAS	79X.00003908	93.712	1638	94	4	1	1635	8848805	8850436	0	2446	8848805	8850436	14929	39589	Partial	+
10	CBDAS	79X.00003908	94.814	1639	76	4	1	1635	8942012	8943645	0	2547	8942012	8943645	6795	39813	Partial	+
11	CBDAS	79X.00003908	92.506	1628	111	4	9	1635	9206931	9208548	0	2320	9206931	9208548	8159	174152	Partial	+
	query	target	pident	length	mismatch	gaps	qstart	qend	tstart	tend	evalue	bitscore	start	end	down	up	type	direction
0	THCAS	ABAC.chr7	91.402	1419	116	6	211	1627	51170636	51172050	0	1940	51170636	51172050	156861	118245	Partial	+
1	CBDAS	ABAC.chr7	91.327	980	83	2	657	1635	51286662	51285684	0	1338	51285684	51286662	271909	3633	Partial	-
2	CBDAS	ABAC.chr7	92.232	1635	122	4	1	1635	51328188	51326559	0	2311	51326559	51328188	14129	413	Partial	-
3	CBDAS	ABAC.chr7	92.477	1635	123	0	1	1635	51977965	51979599	0	2338	51977965	51979599	416	38837	Partial	+
4	CBDAS	ABAC.chr7	91.682	1635	134	1	1	1635	52041410	52043042	0	2265	52041410	52043042	416	15983	Partial	+
5	CBDAS	ABAC.chr7	92.477	1635	123	0	1	1635	52071820	52073454	0	2338	52071820	52073454	416	16020	Partial	+
6	CBDAS	ABAC.chr7	92.416	1635	124	0	1	1635	52111414	52113048	0	2333	52111414	52113048	416	14528	Partial	+
7	CBDAS	ABAC.chr7	91.122	980	82	5	657	1635	52153365	52154340	0	1323	52153365	52154340	3631	22129	Partial	+
8	CBDAS	ABAC.chr7	100	1635	0	0	1	1635	52216283	52217917	0	3020	52216283	52217917	32922	91957	Full	+
	query	target	pident	length	mismatch	gaps	qstart	qend	tstart	tend	evalue	bitscore	start	end	down	up	type	direction
0	THCAS	ABC.00004246	91.4	1628	135	5	1	1627	3358762	3360385	0	2226	3358762	3360385	84232	104880	Partial	+
1	CBDAS	ABC.00004246	91.376	1635	138	1	1	1635	3510024	3508393	0	2235	3508393	3510024	-7409	416	Partial	-
2	CBDAS	ABC.00004246	92.489	1611	121	0	25	1635	3561451	3559841	0	2305	3559841	3561451	26031	434	Partial	-
3	CBDAS	ABC.00004246	89.805	1638	158	3	1	1635	3561469	3559838	0	2091	3559838	3561469	26028	416	Partial	-
4	CBDAS	ABC.00004246	92.232	1635	127	0	1	1635	3602816	3601182	0	2316	3601182	3602816	22232	417	Partial	-
5	CBDAS	ABC.00004246	91.865	1635	133	0	1	1635	3655726	3654092	0	2283	3654092	3655726	25884	416	Partial	-
6	THCAS	ABC.00004246	100	1635	0	0	1	1635	4367699	4366065	0	3020	4366065	4367699	30075	-920	Full	-
7	CBDAS	ABC.00004246	93.772	867	45	4	1	863	4487673	4488534	0	1293	4487673	4488534	8344	53025	Partial	+
8	CBDAS	ABC.00004246	93.935	775	46	1	858	1632	4497975	4498748	0	1170	4497975	4498748	18646	42811	Partial	+
9	CBDAS	ABC.00004246	93.712	1638	94	4	1	1635	4569932	4571563	0	2446	4569932	4571563	14913	49754	Partial	+
10	CBDAS	ABC.00004246	94.814	1639	76	4	1	1635	4714124	4715757	0	2547	4714124	4715757	8567	46896	Partial	+
11	CBDAS	ABC.00004246	92.322	1628	114	4	9	1635	4984759	4986376	0	2303	4984759	4986376	4491	24473	Partial	+
12	CBDAS	ABC.00004234	91.332	1419	117	6	211	1627	4645513	4646927	0	1934	4645513	4646927	15922	25234	Partial	+
13	CBDAS	ABC.00004234	91.988	1635	130	1	1	1635	4791085	4789452	0	2292	4789452	4791085	22272	416	Partial	-
14	CBDAS	ABC.00004234	92.599	1635	121	0	1	1635	4873619	4871985	0	2350	4871985	4873619	32396	416	Partial	-
15	CBDAS	ABC.00004234	92.355	1635	125	0	1	1635	4904635	4903001	0	2327	4903001	4904635	16055	417	Partial	-
16	CBDAS	ABC.00004234	92.232	1635	127	0	1	1635	4973647	4972013	0	2316	4972013	4973647	34731	416	Partial	-
17	CBDAS	ABC.00004234	91.185	1418	121	4	211	1627	5138296	5139710	0	1923	5138296	5139710	15920	146243	Partial	+
18	CBDAS	ABC.00004234	91.988	1635	130	1	1	1635	5285537	5283904	0	2292	5283904	5285537	161528	416	Partial	-
19	CBDAS	ABC.00004234	92.599	1635	121	0	1	1635	5367975	5366341	0	2350	5366341	5367975	20361	416	Partial	-
20	CBDAS	ABC.00004234	92.416	1635	124	0	1	1635	5398577	5396943	0	2333	5396943	5398577	15681	417	Partial	-
21	CBDAS	ABC.00004234	92.294	1635	126	0	1	1635	5459687	5458053	0	2322	5458053	5459687	34732	416	Partial	-
22	THCAS	ABC.00004234	99.939	1635	1	0	1	1635	6105757	6104123	0	3014	6104123	6105757	86381	75691	Full	-
23	CBDAS	ABC.00004234	93.887	867	44	4	1	863	6230901	6231762	0	1299	6230901	6231762	8343	-1173	Partial	+
24	CBDAS	ABC.00004234	94.065	775	45	1	858	1632	6241224	6241997	0	1175	6241224	6241997	6141	40947	Partial	+
25	CBDAS	ABC.00004234	93.773	1638	93	4	1	1635	6301870	6303501	0	2451	6301870	6303501	3316	58272	Partial	+
26	CBDAS	ABC.00004234	94.753	1639	77	4	1	1635	6394948	6396581	0	2542	6394948	6396581	6797	46744	Partial	+
27	CBDAS	ABC.00004234	92.506	1628	111	4	9	1635	6643836	6645453	0	2320	6643836	6645453	8158	347089	Partial	+
28	CBCAS	ABC.00002660	99.817	1635	3	0	1	1635	13276098	13277732	0	3003	13276098	13277732	323205	7848	Full	+
29	CBCAS	ABC.00002660	99.694	1635	5	0	1	1635	13344628	13346262	0	2992	13344628	13346262	55831	82733	Full	+
30	CBCAS	ABC.00002660	99.817	1635	3	0	1	1635	13414344	13415978	0	3003	13414344	13415978	125547	13017	Full	+
31	CBCAS	ABC.00002660	99.755	1635	4	0	1	1635	13482133	13483767	0	2998	13482133	13483767	51708	19711	Full	+
32	CBCAS	ABC.00002660	99.939	1635	1	0	1	1635	13547775	13549409	0	3014	13547775	13549409	40656	59636	Full	+
33	CBCAS	ABC.00002660	99.939	1635	1	0	1	1635	13600309	13601943	0	3014	13600309	13601943	93190	7102	Full	+
34	CBCAS	ABC.00002660	99.878	1635	2	0	1	1635	13657407	13659041	0	3009	13657407	13659041	47188	28537	Full	+
35	CBCAS	ABC.00002660	99.939	1635	1	0	1	1635	13715145	13716779	0	3014	13715145	13716779	21811	-574	Full	+
	query	target	pident	length	mismatch	gaps	qstart	qend	tstart	tend	evalue	bitscore	start	end	down	up	type	direction
0	THCAS	ACBD.00002755	91.402	1419	116	6	211	1627	1492953	1494367	0	1940	1492953	1494367	157170	128628	Partial	+
1	CBDAS	ACBD.00002755	91.327	980	83	2	657	1635	1619357	1618379	0	1338	1618379	1619357	282596	3638	Partial	-
2	CBDAS	ACBD.00002755	92.416	1635	124	0	1	1635	1651353	1649719	0	2333	1649719	1651353	14061	416	Partial	-
3	CBDAS	ACBD.00002755	92.416	1635	124	0	1	1635	1710602	1708968	0	2333	1708968	1710602	14537	416	Partial	-
4	CBDAS	ACBD.00002755	92.538	1635	122	0	1	1635	1744945	1743311	0	2344	1743311	1744945	24288	416	Partial	-
5	CBDAS	ACBD.00002755	91.927	1635	132	0	1	1635	1775340	1773706	0	2289	1773706	1775340	15962	416	Partial	-
6	CBDAS	ACBD.00002755	100	1635	0	0	1	1635	2432499	2434133	0	3020	2432499	2434133	32930	10280	Full	+
7	CBDAS	ACBD.00002740	91.497	1423	116	5	206	1627	7513872	7515290	0	1953	7513872	7515290	-13	59618	Partial	+
8	CBDAS	ACBD.00002740	86.592	1432	185	5	208	1635	7513873	7515301	0	1574	7513873	7515301	-12	59607	Partial	+
9	CBDAS	ACBD.00002740	91.748	1636	133	2	1	1635	7644695	7643061	0	2272	7643061	7644695	1772	417	Partial	-
10	CBDAS	ACBD.00002740	92.294	1635	126	0	1	1635	7675665	7674031	0	2322	7674031	7675665	14993	414	Partial	-
11	CBDAS	ACBD.00002740	92.294	1635	126	0	1	1635	7733355	7731721	0	2322	7731721	7733355	24404	416	Partial	-
12	CBDAS	ACBD.00002740	92.477	1635	123	0	1	1635	7764137	7762503	0	2338	7762503	7764137	16314	1617	Partial	-
13	CBDAS	ACBD.00002740	92.232	1635	127	0	1	1635	7794060	7792426	0	2316	7792426	7794060	15977	416	Partial	-
14	CBDAS	ACBD.00002740	92.379	1194	91	0	442	1635	7825189	7823996	0	1701	7823996	7825189	15982	724	Partial	-
15	CBDAS	ACBD.00002740	99.817	1635	3	0	1	1635	8572346	8573980	0	3003	8572346	8573980	34149	10281	Full	+
16	CBCAS	ACBD.00001219	99.572	1635	7	0	1	1635	18103368	18105002	0	2981	18103368	18105002	48232	175899	Full	+
17	CBCAS	ACBD.00001219	99.633	1635	6	0	1	1635	18159944	18161578	0	2987	18159944	18161578	104808	119323	Full	+
18	CBCAS	ACBD.00001219	99.827	1157	2	0	1	1157	18206277	18207433	0	2126	18206277	18207433	151141	73468	Full	+
19	CBCAS	ACBD.00001219	99.878	1635	2	0	1	1635	18279912	18281546	0	3009	18279912	18281546	224776	-645	Full	+
20	CBCAS	ACBD.00001219	99.756	1636	3	1	1	1635	18343935	18345570	0	2998	18343935	18345570	60290	211180	Partial	+
21	CBCAS	ACBD.00001219	99.878	1635	2	0	1	1635	18391783	18393417	0	3009	18391783	18393417	108138	163333	Full	+
22	CBCAS	ACBD.00001219	99.939	1635	1	0	1	1635	18479663	18481297	0	3014	18479663	18481297	196018	75453	Full	+
	query	target	pident	length	mismatch	gaps	qstart	qend	tstart	tend	evalue	bitscore	start	end	down	up	type	direction
0	CBDAS	ACDC.00000870	100	1635	0	0	1	1635	4494207	4492573	0	3020	4492573	4494207	10280	32932	Full	-
1	CBDAS	ACDC.00000870	91.927	1635	132	0	1	1635	5151371	5153005	0	2289	5151371	5153005	416	6174	Partial	+
2	CBDAS	ACDC.00000870	92.538	1635	122	0	1	1635	5181766	5183400	0	2344	5181766	5183400	416	24288	Partial	+
3	CBDAS	ACDC.00000870	92.416	1635	124	0	1	1635	5216109	5217743	0	2333	5216109	5217743	416	-223	Partial	+
4	CBDAS	ACDC.00000870	92.416	1635	124	0	1	1635	5275358	5276992	0	2333	5275358	5276992	416	14061	Partial	+
5	CBDAS	ACDC.00000870	91.327	980	83	2	657	1635	5307356	5308334	0	1338	5307356	5308334	3638	54370	Partial	+
6	CBDAS	ACDC.00000870	91.298	1425	118	6	211	1633	5433760	5432340	0	1940	5432340	5433760	6276	166781	Partial	-
7	CBCAS	ACDC.00001460	99.572	1635	7	0	1	1635	1918212	1919846	0	2981	1918212	1919846	83195	263859	Full	+
8	CBCAS	ACDC.00001460	99.633	1635	6	0	1	1635	1974788	1976422	0	2987	1974788	1976422	139771	207283	Full	+
9	CBCAS	ACDC.00001460	99.827	1157	2	0	1	1157	2021121	2022277	0	2126	2021121	2022277	186104	161428	Full	+
10	CBCAS	ACDC.00001460	99.878	1635	2	0	1	1635	2094756	2096390	0	3009	2094756	2096390	259739	87315	Full	+
11	CBDAS	ACDC.00001460	99.756	1636	3	1	1	1635	2158779	2160414	0	2998	2158779	2160414	323762	23291	Partial	+
12	CBCAS	ACDC.00001460	99.878	1635	2	0	1	1635	2206627	2208261	0	3009	2206627	2208261	15756	31838	Full	+
13	CBCAS	ACDC.00001460	99.939	1635	1	0	1	1635	2294507	2296141	0	3014	2294507	2296141	50310	75453	Full	+
	query	target	pident	length	mismatch	gaps	qstart	qend	tstart	tend	evalue	bitscore	start	end	down	up	type	direction
0	CBDAS	AH3Ma.chr7	92.232	1635	127	0	1	1635	35443540	35445174	0	2316	35443540	35445174	416	34732	Partial	+
1	CBDAS	AH3Ma.chr7	92.355	1635	125	0	1	1635	35512528	35514162	0	2327	35512528	35514162	417	16056	Partial	+
2	CBDAS	AH3Ma.chr7	92.599	1635	121	0	1	1635	35543543	35545177	0	2350	35543543	35545177	416	32396	Partial	+
3	CBDAS	AH3Ma.chr7	91.988	1635	130	1	1	1635	35626079	35627712	0	2292	35626079	35627712	416	159864	Partial	+
4	CBDAS	AH3Ma.chr7	91.228	1425	119	6	211	1633	35771652	35770232	0	1934	35770232	35771652	144569	15924	Partial	-
5	CBCAS	AH3Ma.chr7	99.939	1635	1	0	1	1635	52950039	52948405	0	3014	52948405	52950039	58192	436409	Full	-
6	CBCAS	AH3Ma.chr7	99.878	1635	2	0	1	1635	53037919	53036285	0	3009	53036285	53037919	146072	348529	Full	-
7	CBCAS	AH3Ma.chr7	99.878	1635	2	0	1	1635	53098647	53097013	0	3009	53097013	53098647	206800	287801	Full	-
8	CBCAS	AH3Ma.chr7	99.756	1636	3	1	1	1635	53146496	53144861	0	2998	53144861	53146496	254648	239952	Partial	-
9	CBCAS	AH3Ma.chr7	99.878	1635	2	0	1	1635	53210531	53208897	0	3009	53208897	53210531	318684	175917	Full	-
10	CBCAS	AH3Ma.chr7	99.571	1166	5	0	1	1166	53284166	53283001	0	2126	53283001	53284166	392788	102282	Full	-
11	CBCAS	AH3Ma.chr7	99.633	1635	6	0	1	1635	53330499	53328865	0	2987	53328865	53330499	438652	55949	Full	-
12	CBCAS	AH3Ma.chr7	99.572	1635	7	0	1	1635	53387075	53385441	0	2981	53385441	53387075	-5325	83193	Full	-
13	CBDAS	AH3Ma.chr7	91.185	1418	121	4	211	1627	53675243	53676657	0	1923	53675243	53676657	15922	146243	Partial	+
14	CBDAS	AH3Ma.chr7	91.988	1635	130	1	1	1635	53822484	53820851	0	2292	53820851	53822484	161530	416	Partial	-
15	CBDAS	AH3Ma.chr7	92.599	1635	121	0	1	1635	53905016	53903382	0	2350	53903382	53905016	32397	416	Partial	-
16	CBDAS	AH3Ma.chr7	92.416	1635	124	0	1	1635	53935628	53933994	0	2333	53933994	53935628	7704	417	Partial	-
17	CBDAS	AH3Ma.chr7	92.294	1635	126	0	1	1635	53996723	53995089	0	2322	53995089	53996723	34732	416	Partial	-
18	THCAS	AH3Ma.chr7	99.939	1635	1	0	1	1635	54643065	54641431	0	3014	54641431	54643065	86386	115634	Full	-
19	CBDAS	AH3Ma.chr7	93.887	867	44	4	1	863	54768229	54769090	0	1299	54768229	54769090	8343	-397	Partial	+
20	CBDAS	AH3Ma.chr7	94.065	775	45	1	858	1632	54778553	54779326	0	1175	54778553	54779326	4766	50428	Partial	+
21	CBDAS	AH3Ma.chr7	93.773	1638	93	4	1	1635	54848680	54850311	0	2451	54848680	54850311	14906	58443	Partial	+
22	CBDAS	AH3Ma.chr7	94.753	1639	77	4	1	1635	54941927	54943560	0	2542	54941927	54943560	6797	46745	Partial	+
23	CBDAS	AH3Ma.chr7	92.506	1628	111	4	9	1635	55216224	55217841	0	2320	55216224	55217841	8158	171662	Partial	+
	query	target	pident	length	mismatch	gaps	qstart	qend	tstart	tend	evalue	bitscore	start	end	down	up	type	direction
0	CBCAS	AH3Mb.chr7	99.817	1635	3	0	1	1635	36200788	36202422	0	3003	36200788	36202422	277519	157105	Full	+
1	CBCAS	AH3Mb.chr7	99.755	1635	4	0	1	1635	36276415	36278049	0	2998	36276415	36278049	353146	81478	Full	+
2	CBCAS	AH3Mb.chr7	99.755	1635	4	0	1	1635	36334664	36336298	0	2998	36334664	36336298	411395	23229	Full	+
3	CBCAS	AH3Mb.chr7	99.694	1635	5	0	1	1635	36449459	36451093	0	2992	36449459	36451093	88008	53915	Full	+
4	CBDAS	AH3Mb.chr7	99.633	1636	5	1	1	1635	36513140	36514775	0	2987	36513140	36514775	1955	616956	Partial	+
5	CBCAS	AH3Mb.chr7	99.817	1635	3	0	1	1635	36551168	36552802	0	3003	36551168	36552802	39983	578929	Full	+
6	CBCAS	AH3Mb.chr7	99.817	1635	3	0	1	1635	36611473	36613107	0	3003	36611473	36613107	100288	518624	Full	+
7	CBCAS	AH3Mb.chr7	99.939	1635	1	0	1	1635	36662576	36664210	0	3014	36662576	36664210	151391	467521	Full	+
8	THCAS	AH3Mb.chr7	91.4	1628	135	5	1	1627	54097015	54098638	0	2226	54097015	54098638	60503	136439	Partial	+
9	CBDAS	AH3Mb.chr7	92.355	1635	125	0	1	1635	54219917	54218283	0	2327	54218283	54219917	181771	15160	Partial	-
10	CBDAS	AH3Mb.chr7	92.171	1635	128	0	1	1635	54234659	54233025	0	2311	54233025	54234659	196513	418	Partial	-
11	THCAS	AH3Mb.chr7	99.694	1635	5	0	1	1635	54754679	54753045	0	2992	54753045	54754679	35101	74534	Full	-
12	CBDAS	AH3Mb.chr7	94.312	1635	85	4	1	1632	54877694	54879323	0	2497	54877694	54879323	30564	33346	Partial	+
13	CBDAS	AH3Mb.chr7	94.567	1638	81	3	1	1635	54924322	54925954	0	2525	54924322	54925954	7114	54443	Partial	+
14	CBDAS	AH3Mb.chr7	95.078	1544	69	2	95	1635	55034979	55036518	0	2423	55034979	55036518	28362	50091	Partial	+
15	CBDAS	AH3Mb.chr7	93.12	1628	110	2	9	1635	55441939	55443565	0	2385	55441939	55443565	159693	33422	Partial	+
	query	target	pident	length	mismatch	gaps	qstart	qend	tstart	tend	evalue	bitscore	start	end	down	up	type	direction
0	CBDAS	BBKH.00002107	92.506	1628	111	4	9	1635	10103766	10102149	0	2320	10102149	10103766	174152	8159	Partial	-
1	CBDAS	BBKH.00002107	94.814	1639	76	4	1	1635	10368685	10367052	0	2547	10367052	10368685	46890	6795	Partial	-
2	CBDAS	BBKH.00002107	93.712	1638	94	4	1	1635	10461890	10460259	0	2446	10460259	10461890	58389	14929	Partial	-
3	CBDAS	BBKH.00002107	87.71	773	90	5	865	1635	10541730	10540961	0	896	10540961	10541730	57564	18672	Partial	-
4	CBDAS	BBKH.00002107	93.959	778	46	1	858	1635	10541734	10540958	0	1175	10540958	10541734	57561	18668	Partial	-
5	CBDAS	BBKH.00002107	93.887	867	44	4	1	863	10552058	10551197	0	1299	10551197	10552058	67800	8344	Partial	-
6	THCAS	BBKH.00002107	99.939	1635	1	0	1	1635	10673830	10675464	0	3014	10673830	10675464	83722	86508	Full	+
7	CBDAS	BBKH.00002107	91.865	1635	133	0	1	1635	11365613	11367247	0	2283	11365613	11367247	416	25886	Partial	+
8	CBDAS	BBKH.00002107	92.171	1635	128	0	1	1635	11418145	11419779	0	2311	11418145	11419779	417	22233	Partial	+
9	CBDAS	BBKH.00002107	89.744	1638	159	3	1	1635	11454529	11456160	0	2085	11454529	11456160	415	26027	Partial	+
10	CBDAS	BBKH.00002107	92.379	1614	123	0	22	1635	11454544	11456157	0	2300	11454544	11456157	430	26030	Partial	+
11	CBDAS	BBKH.00002107	91.376	1635	138	1	1	1635	11505971	11507602	0	2235	11505971	11507602	416	61559	Partial	+
12	THCAS	BBKH.00002107	91.31	1634	137	5	1	1633	11657306	11655677	0	2226	11655677	11657306	83319	155020	Partial	-
13	CBCAS	BBKH.00000795	99.939	1635	1	0	1	1635	2757688	2756054	0	3014	2756054	2757688	75453	48158	Full	-
14	CBCAS	BBKH.00000795	99.878	1635	2	0	1	1635	2845568	2843934	0	3009	2843934	2845568	32037	278504	Full	-
15	CBCAS	BBKH.00000795	99.756	1636	3	1	1	1635	2893416	2891781	0	2998	2891781	2893416	79884	230656	Partial	-
16	CBCAS	BBKH.00000795	99.878	1635	2	0	1	1635	2957439	2955805	0	3009	2955805	2957439	143908	166633	Full	-
17	CBCAS	BBKH.00000795	99.571	1166	5	0	1	1166	3031074	3029909	0	2126	3029909	3031074	218012	92998	Full	-
18	CBCAS	BBKH.00000795	99.633	1635	6	0	1	1635	3077407	3075773	0	2987	3075773	3077407	263876	46665	Full	-
19	CBCAS	BBKH.00000795	99.572	1635	7	0	1	1635	3133983	3132349	0	2981	3132349	3133983	6188	83198	Full	-
	query	target	pident	length	mismatch	gaps	qstart	qend	tstart	tend	evalue	bitscore	start	end	down	up	type	direction
0	CBDAS	BCMa.chr7	100	1635	0	0	1	1635	10001400	9999766	0	3020	9999766	10001400	9270	32930	Full	-
1	CBDAS	BCMa.chr7	92.477	1635	123	0	1	1635	10661820	10663454	0	2338	10661820	10663454	416	38837	Partial	+
2	CBDAS	BCMa.chr7	91.804	1635	134	0	1	1635	10725270	10726904	0	2278	10725270	10726904	416	15983	Partial	+
3	CBDAS	BCMa.chr7	92.477	1635	123	0	1	1635	10755684	10757318	0	2338	10755684	10757318	416	11809	Partial	+
4	CBDAS	BCMa.chr7	92.416	1635	124	0	1	1635	10795276	10796910	0	2333	10795276	10796910	416	14528	Partial	+
5	CBDAS	BCMa.chr7	92.355	1635	125	0	1	1635	10864002	10865636	0	2327	10864002	10865636	416	14060	Partial	+
6	CBDAS	BCMa.chr7	91.327	980	83	2	657	1635	10905501	10906479	0	1338	10905501	10906479	3635	302471	Partial	+
7	THCAS	BCMa.chr7	91.298	1425	118	6	211	1633	11021459	11020039	0	1940	11020039	11021459	118173	187491	Partial	-
8	CBCAS	BCMa.chr7	99.817	1635	3	0	1	1635	28841681	28840047	0	3003	28840047	28841681	17088	63612	Full	-
9	CBCAS	BCMa.chr7	99.817	1635	3	0	1	1635	28903512	28901878	0	3003	28901878	28903512	78919	1781	Full	-
10	CBDAS	BCMa.chr7	88.226	620	69	4	1018	1635	28936726	28936109	0	737	28936109	28936726	22420	90041	Partial	-
11	CBCAS	BCMa.chr7	100	616	0	0	1020	1635	28936727	28936112	0	1138	28936112	28936727	22423	90040	Full	-
12	CBCAS	BCMa.chr7	99.902	1022	1	0	1	1022	28947696	28946675	0	1882	28946675	28947696	32986	79071	Full	-
13	CBCAS	BCMa.chr7	99.878	1635	2	0	1	1635	29018616	29016982	0	3009	29016982	29018616	103293	8151	Full	-
14	CBCAS	BCMa.chr7	99.817	1635	3	0	1	1635	29093332	29091698	0	3003	29091698	29093332	63892	21036	Full	-
15	CBCAS	BCMa.chr7	99.878	1635	2	0	1	1635	29171396	29169762	0	3009	29169762	29171396	51752	83128	Full	-
16	CBCAS	BCMa.chr7	99.694	1635	5	0	1	1635	29265155	29263521	0	2992	29263521	29265155	2822	213772	Full	-
17	CBCAS	BCMa.chr7	99.878	1635	2	0	1	1635	29324105	29322471	0	3009	29322471	29324105	61772	154822	Full	-
18	CBCAS	BCMa.chr7	99.817	1635	3	0	1	1635	29347862	29346228	0	3003	29346228	29347862	85529	131065	Full	-
19	CBCAS	BCMa.chr7	99.694	1635	3	2	1	1635	29399601	29397969	0	2990	29397969	29399601	137270	79326	Partial	-
	query	target	pident	length	mismatch	gaps	qstart	qend	tstart	tend	evalue	bitscore	start	end	down	up	type	direction
0	CBDAS	BCMb.chr7	100	1635	0	0	1	1635	9962045	9960411	0	3020	9960411	9962045	91977	32930	Full	-
1	CBDAS	BCMb.chr7	92.477	1635	123	0	1	1635	10618448	10620082	0	2338	10618448	10620082	416	4969	Partial	+
2	CBDAS	BCMb.chr7	91.804	1635	134	0	1	1635	10681898	10683532	0	2278	10681898	10683532	416	15983	Partial	+
3	CBDAS	BCMb.chr7	92.477	1635	123	0	1	1635	10712310	10713944	0	2338	10712310	10713944	416	16020	Partial	+
4	CBDAS	BCMb.chr7	92.416	1635	124	0	1	1635	10751902	10753536	0	2333	10751902	10753536	416	14529	Partial	+
5	CBDAS	BCMb.chr7	92.355	1635	125	0	1	1635	10827841	10829475	0	2327	10827841	10829475	416	-2116	Partial	+
6	CBDAS	BCMb.chr7	91.327	980	83	2	657	1635	10869339	10870317	0	1338	10869339	10870317	3635	49088	Partial	+
7	CBDAS	BCMb.chr7	91.298	1425	118	6	211	1633	10985363	10983943	0	1940	10983943	10985363	63411	2786	Partial	-
	query	target	pident	length	mismatch	gaps	qstart	qend	tstart	tend	evalue	bitscore	start	end	down	up	type	direction
0	CBDAS	BH44.000007F	92.506	1628	111	4	9	1635	11449249	11447632	0	2320	11447632	11449249	174151	8159	Partial	-
1	CBDAS	BH44.000007F	94.814	1639	76	4	1	1635	11714167	11712534	0	2547	11712534	11714167	46891	6795	Partial	-
2	CBDAS	BH44.000007F	93.712	1638	94	4	1	1635	11807374	11805743	0	2446	11805743	11807374	58391	14929	Partial	-
3	CBDAS	BH44.000007F	87.71	773	90	5	865	1635	11887215	11886446	0	896	11886446	11887215	60124	18672	Partial	-
4	CBDAS	BH44.000007F	93.959	778	46	1	858	1635	11887219	11886443	0	1175	11886443	11887219	60121	18668	Partial	-
5	CBDAS	BH44.000007F	93.887	867	44	4	1	863	11897543	11896682	0	1299	11896682	11897543	70360	8344	Partial	-
6	THCAS	BH44.000007F	99.878	1635	2	0	1	1635	12019319	12020953	0	3009	12019319	12020953	83725	86507	Full	+
7	CBDAS	BH44.000007F	91.865	1635	133	0	1	1635	12721407	12723041	0	2283	12721407	12723041	416	25886	Partial	+
8	CBDAS	BH44.000007F	92.171	1635	128	0	1	1635	12773946	12775580	0	2311	12773946	12775580	417	22233	Partial	+
9	CBDAS	BH44.000007F	89.744	1638	159	3	1	1635	12810331	12811962	0	2085	12810331	12811962	415	26027	Partial	+
10	CBDAS	BH44.000007F	92.379	1614	123	0	22	1635	12810346	12811959	0	2300	12810346	12811959	430	26030	Partial	+
11	CBDAS	BH44.000007F	91.376	1635	138	1	1	1635	12861775	12863406	0	2235	12861775	12863406	416	304728	Partial	+
12	THCAS	BH44.000007F	91.31	1634	137	5	1	1633	13013110	13011481	0	2226	13011481	13013110	150122	155024	Partial	-
	query	target	pident	length	mismatch	gaps	qstart	qend	tstart	tend	evalue	bitscore	start	end	down	up	type	direction
0	CBDAS	BH4.00001221	94.994	1638	73	3	1	1635	4557506	4555875	0	2562	4555875	4557506	4519	18133	Partial	-
1	CBDAS	BH4.00001221	94.139	1638	88	3	1	1635	4604427	4602795	0	2486	4602795	4604427	2179	11667	Partial	-
2	CBDAS	BH4.00001221	94.207	1640	86	4	1	1635	4691701	4690066	0	2494	4690066	4691701	23320	14620	Partial	-
3	THCAS	BH4.00001221	99.755	1635	4	0	1	1635	4806091	4807725	0	2998	4806091	4807725	18919	54696	Full	+
4	CBDAS	BH4.00001221	92.416	1635	124	0	1	1635	5544078	5545712	0	2333	5544078	5545712	416	18008	Partial	+
5	CBDAS	BH4.00001221	92.416	1635	123	1	1	1635	5589708	5591341	0	2331	5589708	5591341	418	16057	Partial	+
6	CBDAS	BH4.00001221	92.355	1635	125	0	1	1635	5620704	5622338	0	2327	5620704	5622338	416	6224	Partial	+
7	CBDAS	BH4.00001221	92.049	1635	129	1	1	1635	5666548	5668181	0	2298	5666548	5668181	415	54752	Partial	+
8	THCAS	BH4.00001221	91.222	1424	121	4	211	1633	5843831	5842411	0	1934	5842411	5843831	107851	92275	Partial	-
9	CBDAS	BH4.00001155	91.4	1628	135	5	1	1627	4331168	4332791	0	2226	4331168	4332791	34846	97241	Partial	+
10	CBDAS	BH4.00001155	91.376	1635	138	1	1	1635	4482431	4480800	0	2235	4480800	4482431	42495	416	Partial	-
11	CBDAS	BH4.00001155	92.489	1611	121	0	25	1635	4533858	4532248	0	2305	4532248	4533858	26030	434	Partial	-
12	CBDAS	BH4.00001155	89.805	1638	158	3	1	1635	4533876	4532245	0	2091	4532245	4533876	26027	416	Partial	-
13	CBDAS	BH4.00001155	92.232	1635	127	0	1	1635	4575222	4573588	0	2316	4573588	4575222	22232	417	Partial	-
14	CBDAS	BH4.00001155	91.865	1635	133	0	1	1635	4628134	4626500	0	2283	4626500	4628134	1952	416	Partial	-
15	THCAS	BH4.00001155	100	1635	0	0	1	1635	5329803	5328169	0	3020	5328169	5329803	37337	42348	Full	-
16	CBDAS	BH4.00001155	93.772	867	45	4	1	863	5449778	5450639	0	1293	5449778	5450639	8344	10868	Partial	+
17	CBDAS	BH4.00001155	93.935	775	46	1	858	1632	5460080	5460853	0	1170	5460080	5460853	18646	654	Partial	+
18	CBDAS	BH4.00001155	93.712	1638	94	4	1	1635	5530204	5531835	0	2446	5530204	5531835	14913	5488	Partial	+
19	CBDAS	BH4.00001155	94.814	1639	76	4	1	1635	5674399	5676032	0	2547	5674399	5676032	8266	46901	Partial	+
20	CBDAS	BH4.00001155	92.506	1628	111	4	9	1635	5947942	5949559	0	2320	5947942	5949559	8194	24805	Partial	+
	query	target	pident	length	mismatch	gaps	qstart	qend	tstart	tend	evalue	bitscore	start	end	down	up	type	direction
0	CBDAS	BH55.00004269	94.814	1639	76	4	1	1635	247635	246002	0	2547	246002	247635	-884	1678	Partial	-
1	CBDAS	BH55.00004269	93.712	1638	94	4	1	1635	340842	339211	0	2446	339211	340842	-1616	18981	Partial	-
2	CBDAS	BH55.00004269	87.71	773	90	5	865	1635	420684	419915	0	896	419915	420684	38029	17612	Partial	-
3	CBDAS	BH55.00004269	93.959	778	46	1	858	1635	420688	419912	0	1175	419912	420688	38026	17608	Partial	-
4	CBDAS	BH55.00004269	93.887	867	44	4	1	863	431012	430151	0	1299	430151	431012	48265	7284	Partial	-
5	THCAS	BH55.00004269	99.878	1635	2	0	1	1635	552790	554424	0	3009	552790	554424	19783	19828	Full	+
6	CBDAS	BH55.00003212	92.322	1628	114	4	9	1635	728712	727095	0	2303	727095	728712	58172	1112	Partial	-
7	CBDAS	BH55.00003212	94.814	1639	76	4	1	1635	999347	997714	0	2547	997714	999347	46900	8567	Partial	-
8	CBDAS	BH55.00003212	93.712	1638	94	4	1	1635	1143539	1141908	0	2446	1141908	1143539	100598	14913	Partial	-
9	CBDAS	BH55.00003212	87.581	773	91	5	865	1635	1215547	1214778	0	891	1214778	1215547	52316	18650	Partial	-
10	CBDAS	BH55.00003212	93.83	778	47	1	858	1635	1215551	1214775	0	1170	1214775	1215551	52313	18646	Partial	-
11	CBDAS	BH55.00003212	93.772	867	45	4	1	863	1225853	1224992	0	1293	1224992	1225853	62530	8344	Partial	-
12	THCAS	BH55.00003212	100	1635	0	0	1	1635	1345828	1347462	0	3020	1345828	1347462	17621	86508	Full	+
13	CBDAS	BH55.00003292	91.865	1635	133	0	1	1635	112289	113923	0	2283	112289	113923	416	3445	Partial	+
14	CBDAS	BH55.00003292	92.232	1635	127	0	1	1635	165200	166834	0	2316	165200	166834	417	22233	Partial	+
15	CBDAS	BH55.00003292	89.805	1638	158	3	1	1635	206547	208178	0	2091	206547	208178	416	20219	Partial	+
16	CBDAS	BH55.00003292	92.441	1614	122	0	22	1635	206562	208175	0	2305	206562	208175	431	20222	Partial	+
17	CBDAS	BH55.00003292	91.376	1635	138	1	1	1635	257993	259624	0	2235	257993	259624	416	17658	Partial	+
18	CBDAS	BH55.00003292	91.31	1634	137	5	1	1633	409257	407628	0	2226	407628	409257	25742	29039	Partial	-
19	CBDAS	BH55.00006131	91.865	1635	133	0	1	1635	200877	202511	0	2283	200877	202511	416	2272	Partial	+
20	CBDAS	BH55.00006131	92.171	1635	128	0	1	1635	253414	255048	0	2311	253414	255048	417	-1087	Partial	+
21	CBDAS	BH55.00006131	89.744	1638	159	3	1	1635	289800	291431	0	2085	289800	291431	415	26027	Partial	+
22	CBDAS	BH55.00006131	92.379	1614	123	0	22	1635	289815	291428	0	2300	289815	291428	430	26030	Partial	+
23	CBDAS	BH55.00006131	91.376	1635	138	1	1	1635	341243	342874	0	2235	341243	342874	416	16949	Partial	+
	query	target	pident	length	mismatch	gaps	qstart	qend	tstart	tend	evalue	bitscore	start	end	down	up	type	direction
0	CBDAS	BLCv1a.000217	93.428	1628	105	2	9	1635	468463	466837	0	2412	466837	468463	56878	96961	Partial	-
1	CBDAS	BLCv1a.000217	99.327	1635	11	0	1	1635	888556	886922	0	2959	886922	888556	12674	117317	Partial	-
2	CBDAS	BLCv1a.000217	92.477	1635	123	0	1	1635	1470872	1472506	0	2338	1470872	1472506	416	29370	Partial	+
3	CBDAS	BLCv1a.000217	91.988	1635	131	0	1	1635	1524882	1526516	0	2294	1524882	1526516	416	15961	Partial	+
4	CBDAS	BLCv1a.000217	92.538	1635	122	0	1	1635	1555266	1556900	0	2344	1555266	1556900	416	18124	Partial	+
5	CBDAS	BLCv1a.000217	92.294	1635	126	0	1	1635	1587868	1589502	0	2322	1587868	1589502	416	14534	Partial	+
6	CBDAS	BLCv1a.000217	92.355	1635	125	0	1	1635	1646913	1648547	0	2327	1646913	1648547	417	13887	Partial	+
7	CBDAS	BLCv1a.000217	91.327	980	83	2	657	1635	1679831	1680809	0	1338	1679831	1680809	3636	257072	Partial	+
8	THCAS	BLCv1a.000217	91.439	1425	116	6	211	1633	1813808	1812388	0	1951	1812388	1813808	136193	124073	Partial	-
9	CBCAS	BLCv1a.000219	99.939	1635	1	0	1	1635	1740117	1738483	0	3014	1738483	1740117	62288	197764	Full	-
10	CBCAS	BLCv1a.000219	99.878	1635	2	0	1	1635	1797838	1796204	0	3009	1796204	1797838	120009	140043	Full	-
11	CBCAS	BLCv1a.000219	99.878	1635	2	0	1	1635	1854938	1853304	0	3009	1853304	1854938	177109	82943	Full	-
12	CBCAS	BLCv1a.000219	99.939	1635	1	0	1	1635	1907473	1905839	0	3014	1905839	1907473	229644	30408	Full	-
13	CBCAS	BLCv1a.000219	99.755	1635	4	0	1	1635	1973116	1971482	0	2998	1971482	1973116	155	16655	Full	-
	query	target	pident	length	mismatch	gaps	qstart	qend	tstart	tend	evalue	bitscore	start	end	down	up	type	direction
0	THCAS	BLCv1b.000171	91.402	1419	116	6	211	1627	3374763	3376177	0	1940	3374763	3376177	187474	118244	Partial	+
1	CBDAS	BLCv1b.000171	91.327	980	83	2	657	1635	3490786	3489808	0	1338	3489808	3490786	302519	3635	Partial	-
2	CBDAS	BLCv1b.000171	92.355	1635	125	0	1	1635	3532283	3530649	0	2327	3530649	3532283	14060	416	Partial	-
3	CBDAS	BLCv1b.000171	92.416	1635	124	0	1	1635	3608223	3606589	0	2333	3606589	3608223	14529	416	Partial	-
4	CBDAS	BLCv1b.000171	92.477	1635	123	0	1	1635	3647816	3646182	0	2338	3646182	3647816	16020	416	Partial	-
5	CBDAS	BLCv1b.000171	91.804	1635	134	0	1	1635	3678231	3676597	0	2278	3676597	3678231	15983	416	Partial	-
6	CBDAS	BLCv1b.000171	92.477	1635	123	0	1	1635	3741678	3740044	0	2338	3740044	3741678	38837	416	Partial	-
7	CBDAS	BLCv1b.000171	100	1635	0	0	1	1635	4402020	4403654	0	3020	4402020	4403654	32932	10559	Full	+
8	CBDAS	BLCv1b.000104	99.694	1635	3	2	1	1635	4139834	4141466	0	2990	4139834	4141466	79311	31191	Partial	+
9	CBCAS	BLCv1b.000104	99.817	1635	3	0	1	1635	4191573	4193207	0	3003	4191573	4193207	9541	85529	Full	+
10	CBCAS	BLCv1b.000104	99.878	1635	2	0	1	1635	4215330	4216964	0	3009	4215330	4216964	33298	61772	Full	+
11	CBCAS	BLCv1b.000104	99.694	1635	5	0	1	1635	4274280	4275914	0	2992	4274280	4275914	92248	2822	Full	+
12	CBCAS	BLCv1b.000104	99.878	1635	2	0	1	1635	4360827	4362461	0	3009	4360827	4362461	6503	-9499	Full	+
13	CBCAS	BLCv1b.000104	99.817	1635	3	0	1	1635	4438891	4440525	0	3003	4438891	4440525	21036	55098	Full	+
14	CBCAS	BLCv1b.000104	99.878	1635	2	0	1	1635	4513613	4515247	0	3009	4513613	4515247	10131	37184	Full	+
15	CBCAS	BLCv1b.000104	99.902	1022	1	0	1	1022	4584533	4585554	0	1882	4584533	4585554	25878	194028	Full	+
16	CBCAS	BLCv1b.000104	100	616	0	0	1020	1635	4595502	4596117	0	1138	4595502	4596117	36847	183465	Full	+
17	CBDAS	BLCv1b.000104	88.226	620	69	4	1018	1635	4595503	4596120	0	737	4595503	4596120	36848	183462	Partial	+
18	CBCAS	BLCv1b.000104	99.817	1635	3	0	1	1635	4628718	4630352	0	3003	4628718	4630352	70063	149230	Full	+
19	CBCAS	BLCv1b.000104	99.817	1635	3	0	1	1635	4690549	4692183	0	3003	4690549	4692183	131894	87399	Full	+
	query	target	pident	length	mismatch	gaps	qstart	qend	tstart	tend	evalue	bitscore	start	end	down	up	type	direction
0	CBDAS	BLYS.00004009	92.506	1628	111	4	9	1635	2573404	2571787	0	2320	2571787	2573404	61906	8159	Partial	-
1	CBDAS	BLYS.00004009	94.814	1639	76	4	1	1635	2838323	2836690	0	2547	2836690	2838323	46890	6795	Partial	-
2	CBDAS	BLYS.00004009	93.712	1638	94	4	1	1635	2931530	2929899	0	2446	2929899	2931530	39934	13610	Partial	-
3	CBDAS	BLYS.00004009	87.71	773	90	5	865	1635	3011371	3010602	0	896	3010602	3011371	28844	18672	Partial	-
4	CBDAS	BLYS.00004009	93.959	778	46	1	858	1635	3011375	3010599	0	1175	3010599	3011375	28841	18668	Partial	-
5	CBDAS	BLYS.00004009	93.887	867	44	4	1	863	3021699	3020838	0	1299	3020838	3021699	39080	8344	Partial	-
6	THCAS	BLYS.00004009	99.939	1635	1	0	1	1635	3143472	3145106	0	3014	3143472	3145106	83722	8118	Full	+
7	CBDAS	BLYS.00004009	91.865	1635	133	0	1	1635	3835256	3836890	0	2283	3835256	3836890	416	25886	Partial	+
8	CBDAS	BLYS.00004009	92.171	1635	128	0	1	1635	3887793	3889427	0	2311	3887793	3889427	417	22233	Partial	+
9	CBDAS	BLYS.00004009	89.744	1638	159	3	1	1635	3924178	3925809	0	2085	3924178	3925809	415	26027	Partial	+
10	CBDAS	BLYS.00004009	92.379	1614	123	0	22	1635	3924193	3925806	0	2300	3924193	3925806	430	26030	Partial	+
11	CBDAS	BLYS.00004009	91.376	1635	138	1	1	1635	3975623	3977254	0	2235	3975623	3977254	416	297338	Partial	+
12	THCAS	BLYS.00004009	91.31	1634	137	5	1	1633	4126958	4125329	0	2226	4125329	4126958	150122	147634	Partial	-
13	CBCAS	BLYS.00004223	99.939	1635	1	0	1	1635	904902	903268	0	3014	903268	904902	-1406	35065	Full	-
14	CBCAS	BLYS.00004223	99.878	1635	2	0	1	1635	992782	991148	0	3009	991148	992782	26764	128871	Full	-
15	CBCAS	BLYS.00004223	99.878	1635	2	0	1	1635	1053510	1051876	0	3009	1051876	1053510	87492	68143	Full	-
16	CBDAS	BLYS.00004223	99.756	1636	3	1	1	1635	1101359	1099724	0	2998	1099724	1101359	135340	20294	Partial	-
17	CBCAS	BLYS.00004223	99.878	1635	2	0	1	1635	1165394	1163760	0	3009	1163760	1165394	17651	193388	Full	-
18	CBCAS	BLYS.00004223	99.571	1166	5	0	1	1166	1239029	1237864	0	2126	1237864	1239029	91755	119753	Full	-
19	CBCAS	BLYS.00004223	99.633	1635	6	0	1	1635	1285361	1283727	0	2987	1283727	1285361	137618	73421	Full	-
20	CBCAS	BLYS.00004223	99.572	1635	7	0	1	1635	1341936	1340302	0	2981	1340302	1341936	194193	16846	Full	-
21	CBDAS	BLYS.00004223	91.185	1418	121	4	211	1627	1630098	1631512	0	1923	1630098	1631512	9185	146241	Partial	+
22	CBDAS	BLYS.00004223	91.988	1635	130	1	1	1635	1777337	1775704	0	2292	1775704	1777337	154791	416	Partial	-
23	CBDAS	BLYS.00004223	92.599	1635	121	0	1	1635	1859868	1858234	0	2350	1858234	1859868	32397	416	Partial	-
24	CBDAS	BLYS.00004223	92.416	1635	124	0	1	1635	1890474	1888840	0	2333	1888840	1890474	15681	417	Partial	-
25	CBDAS	BLYS.00004223	92.294	1635	126	0	1	1635	1951565	1949931	0	2322	1949931	1951565	32462	416	Partial	-
26	THCAS	BLYS.00004223	99.939	1635	1	0	1	1635	2597901	2596267	0	3014	2596267	2597901	3842	39915	Full	-
27	CBDAS	BLYS.00004223	93.887	867	44	4	1	863	2723065	2723926	0	1299	2723065	2723926	8343	47476	Partial	+
28	CBDAS	BLYS.00004223	94.065	775	45	1	858	1632	2733388	2734161	0	1175	2733388	2734161	18666	37241	Partial	+
29	CBDAS	BLYS.00004223	93.773	1638	93	4	1	1635	2803515	2805146	0	2451	2803515	2805146	13715	39972	Partial	+
30	CBDAS	BLYS.00004223	94.753	1639	77	4	1	1635	2896762	2898395	0	2542	2896762	2898395	6797	46745	Partial	+
31	CBDAS	BLYS.00004223	92.506	1628	111	4	9	1635	3171059	3172676	0	2320	3171059	3172676	8158	58937	Partial	+
32	CBDAS	BLYS.00003994	92.232	1635	127	0	1	1635	301830	303464	0	2316	301830	303464	416	34732	Partial	+
33	CBDAS	BLYS.00003994	92.355	1635	125	0	1	1635	370817	372451	0	2327	370817	372451	417	16056	Partial	+
34	CBDAS	BLYS.00003994	92.599	1635	121	0	1	1635	401832	403466	0	2350	401832	403466	416	32396	Partial	+
35	CBDAS	BLYS.00003994	91.988	1635	130	1	1	1635	484366	485999	0	2292	484366	485999	416	147946	Partial	+
36	CBDAS	BLYS.00003994	91.228	1425	119	6	211	1633	629941	628521	0	1934	628521	629941	144571	4004	Partial	-
	query	target	pident	length	mismatch	gaps	qstart	qend	tstart	tend	evalue	bitscore	start	end	down	up	type	direction
0	CBDAS	BOAXa.chr7	91.402	1419	116	6	211	1627	53116237	53117651	0	1940	53116237	53117651	58540	128592	Partial	+
1	CBDAS	BOAXa.chr7	91.327	980	83	2	657	1635	53242606	53241628	0	1338	53241628	53242606	183931	3637	Partial	-
2	CBDAS	BOAXa.chr7	92.416	1635	124	0	1	1635	53274605	53272971	0	2333	53272971	53274605	14062	416	Partial	-
3	CBDAS	BOAXa.chr7	92.416	1635	124	0	1	1635	53333849	53332215	0	2333	53332215	53333849	14536	416	Partial	-
4	CBDAS	BOAXa.chr7	92.538	1635	122	0	1	1635	53368216	53366582	0	2344	53366582	53368216	24308	416	Partial	-
5	CBDAS	BOAXa.chr7	92.049	1635	130	0	1	1635	53398614	53396980	0	2300	53396980	53398614	15961	416	Partial	-
6	CBDAS	BOAXa.chr7	99.511	1635	8	0	1	1635	54048564	54050198	0	2976	54048564	54050198	32835	46024	Full	+
	query	target	pident	length	mismatch	gaps	qstart	qend	tstart	tend	evalue	bitscore	start	end	down	up	type	direction
0	CBDAS	BOAXb.chr7	99.817	1635	3	0	1	1635	9546355	9544721	0	3003	9544721	9546355	10282	34161	Full	-
1	CBDAS	BOAXb.chr7	92.385	1195	89	2	442	1635	10300974	10302167	0	1701	10300974	10302167	724	15982	Partial	+
2	CBDAS	BOAXb.chr7	92.232	1635	127	0	1	1635	10332101	10333735	0	2316	10332101	10333735	416	13615	Partial	+
3	CBDAS	BOAXb.chr7	92.294	1635	126	0	1	1635	10362022	10363656	0	2322	10362022	10363656	628	16356	Partial	+
4	CBDAS	BOAXb.chr7	92.232	1635	127	0	1	1635	10392848	10394482	0	2316	10392848	10394482	416	24404	Partial	+
5	CBDAS	BOAXb.chr7	91.988	1635	126	1	1	1635	10450551	10452180	0	2289	10450551	10452180	414	14992	Partial	+
6	CBDAS	BOAXb.chr7	91.687	1636	134	2	1	1635	10481517	10483151	0	2266	10481517	10483151	417	53356	Partial	+
7	CBDAS	BOAXb.chr7	86.564	1429	185	5	211	1635	10605114	10603689	0	1568	10603689	10605114	58080	35796	Partial	-
8	CBDAS	BOAXb.chr7	91.323	1429	119	5	206	1633	10605118	10603694	0	1947	10603694	10605118	58085	35792	Partial	-
9	CBCAS	BOAXb.chr7	99.939	1635	1	0	1	1635	28383529	28381895	0	3014	28381895	28383529	170306	93959	Full	-
10	CBCAS	BOAXb.chr7	99.878	1635	2	0	1	1635	28441267	28439633	0	3009	28439633	28441267	228044	36221	Full	-
11	CBCAS	BOAXb.chr7	99.755	1635	4	0	1	1635	28512751	28511117	0	2998	28511117	28512751	32401	120292	Full	-
12	CBCAS	BOAXb.chr7	99.755	1635	4	0	1	1635	28582470	28580836	0	2998	28580836	28582470	102120	50573	Full	-
13	CBCAS	BOAXb.chr7	99.755	1635	4	0	1	1635	28651001	28649367	0	2998	28649367	28651001	8328	69649	Full	-
	query	target	pident	length	mismatch	gaps	qstart	qend	tstart	tend	evalue	bitscore	start	end	down	up	type	direction
0	CBDAS	CALO.00001941	91.4	1628	135	5	1	1627	2030407	2032030	0	2226	2030407	2032030	60503	55283	Partial	+
1	CBDAS	CALO.00001941	92.355	1635	125	0	1	1635	2153308	2151674	0	2327	2151674	2153308	58094	15160	Partial	-
2	CBDAS	CALO.00001941	92.171	1635	128	0	1	1635	2168050	2166416	0	2311	2166416	2168050	72836	418	Partial	-
3	THCAS	CALO.00001941	99.694	1635	5	0	1	1635	2688061	2686427	0	2992	2686427	2688061	8420	74535	Full	-
4	CBDAS	CALO.00001941	94.312	1635	85	4	1	1632	2811077	2812706	0	2497	2811077	2812706	18582	101074	Partial	+
5	CBDAS	CALO.00001941	94.567	1638	81	3	1	1635	2857705	2859337	0	2525	2857705	2859337	65210	54443	Partial	+
6	CBDAS	CALO.00001941	95.078	1544	69	2	95	1635	2968362	2969901	0	2423	2968362	2969901	28362	5644	Partial	+
7	CBDAS	CALO.00001941	93.12	1628	110	2	9	1635	3375324	3376950	0	2385	3375324	3376950	61052	56220	Partial	+
8	CBCAS	CALO.00000187	99.939	1635	1	0	1	1635	4525533	4523899	0	3014	4523899	4525533	92945	151392	Full	-
9	CBCAS	CALO.00000187	99.817	1635	3	0	1	1635	4576637	4575003	0	3003	4575003	4576637	144049	100288	Full	-
10	CBCAS	CALO.00000187	99.817	1635	3	0	1	1635	4636942	4635308	0	3003	4635308	4636942	204354	39983	Full	-
11	CBDAS	CALO.00000187	99.633	1636	5	1	1	1635	4674970	4673335	0	2987	4673335	4674970	242381	1955	Partial	-
12	CBCAS	CALO.00000187	99.694	1635	5	0	1	1635	4738651	4737017	0	2992	4737017	4738651	53915	125472	Full	-
13	CBCAS	CALO.00000187	99.755	1635	4	0	1	1635	4853447	4851813	0	2998	4851813	4853447	168711	10676	Full	-
14	CBCAS	CALO.00000187	99.755	1635	4	0	1	1635	4911696	4910062	0	2998	4910062	4911696	42472	16445	Full	-
15	CBCAS	CALO.00000187	99.817	1635	3	0	1	1635	4987325	4985691	0	3003	4985691	4987325	54387	183916	Full	-
	query	target	pident	length	mismatch	gaps	qstart	qend	tstart	tend	evalue	bitscore	start	end	down	up
	query	target	pident	length	mismatch	gaps	qstart	qend	tstart	tend	evalue	bitscore	start	end	down	up	type	direction
0	CBCAS	CBDRX.chr7	99.755	1635	4	0	1	1635	25821957	25823591	0	2998	25821957	25823591	335329	451392	Full	+
1	CBCAS	CBDRX.chr7	91.596	1642	124	12	1	1635	25870545	25872179	0	2255	25870545	25872179	383917	402804	Partial	+
2	CBCAS	CBDRX.chr7	97.847	1161	16	9	1	1157	25916410	25917565	0	1997	25916410	25917565	429782	357418	Partial	+
3	CBCAS	CBDRX.chr7	98.962	1637	13	4	1	1635	25982099	25983733	0	2926	25982099	25983733	495471	291250	Partial	+
4	CBCAS	CBDRX.chr7	99.328	1637	6	5	1	1635	26045537	26047170	0	2957	26045537	26047170	558909	227813	Partial	+
5	CBCAS	CBDRX.chr7	98.411	1636	17	8	1	1635	26085884	26087511	0	2868	26085884	26087511	599256	187472	Partial	+
6	CBCAS	CBDRX.chr7	95.565	1646	28	41	1	1635	26171983	26173594	0	2593	26171983	26173594	685355	101389	Partial	+
7	CBDAS	CBDRX.chr7	91.327	980	83	2	657	1635	29546101	29545123	0	1338	29545123	29546101	84634	3623	Partial	-
8	CBDAS	CBDRX.chr7	90.244	1640	143	15	1	1635	29577880	29576253	0	2126	29576253	29577880	13891	416	Partial	-
9	CBDAS	CBDRX.chr7	92.477	1635	123	0	1	1635	29636867	29635233	0	2338	29635233	29636867	14394	415	Partial	-
10	CBDAS	CBDRX.chr7	91.875	1637	126	6	1	1635	29670996	29669365	0	2279	29669365	29670996	24129	416	Partial	-
11	CBDAS	CBDRX.chr7	91.32	1636	135	6	1	1635	29701184	29699555	0	2228	29699555	29701184	15784	416	Partial	-
12	CBDAS	CBDRX.chr7	100	1635	0	0	1	1635	30982731	30981097	0	3020	30981097	30982731	1216439	31704	Full	-
	query	target	pident	length	mismatch	gaps	qstart	qend	tstart	tend	evalue	bitscore	start	end	down	up	type	direction
0	CBCAS	CBIO2.chr7	99.939	1635	1	0	1	1635	29465649	29467283	0	3014	29465649	29467283	52888	196348	Full	+
1	CBCAS	CBIO2.chr7	99.827	1157	2	0	1	1157	29518628	29519784	0	2126	29518628	29519784	105867	143847	Full	+
2	THCAS	CBIO2.chr7	100	1635	0	0	1	1635	29533369	29535003	0	3020	29533369	29535003	120608	128628	Full	+
3	CBCAS	CBIO2.chr7	99.878	1635	2	0	1	1635	29577849	29579483	0	3009	29577849	29579483	165088	84148	Full	+
4	CBDAS	CBIO2.chr7	91.327	980	83	2	657	1635	33123492	33122514	0	1338	33122514	33123492	40523	3637	Partial	-
5	CBDAS	CBIO2.chr7	92.416	1635	124	0	1	1635	33133246	33131612	0	2333	33131612	33133246	2701	416	Partial	-
6	CBDAS	CBIO2.chr7	92.416	1635	124	0	1	1635	33201574	33199940	0	2333	33199940	33201574	15973	417	Partial	-
7	CBDAS	CBIO2.chr7	92.489	1611	121	0	25	1635	33236069	33234459	0	2305	33234459	33236069	24468	433	Partial	-
8	CBDAS	CBIO2.chr7	89.805	1638	158	3	1	1635	33236087	33234456	0	2091	33234456	33236087	24465	415	Partial	-
9	CBDAS	CBIO2.chr7	92.294	1635	126	0	1	1635	33277407	33275773	0	2322	33275773	33277407	22230	417	Partial	-
10	CBDAS	CBIO2.chr7	91.865	1635	133	0	1	1635	33342898	33341264	0	2283	33341264	33342898	29206	416	Partial	-
11	CBDAS	CBIO2.chr7	91.927	1635	132	0	1	1635	33373578	33371944	0	2289	33371944	33373578	15984	416	Partial	-
12	Cannabis_sativa_CBDAS_AB292682	CBIO2.chr7	93.59	1638	96	4	1	1635	34566108	34564477	0	2435	34564477	34566108	261218	439526	Partial	-
13	Cannabis_sativa_CBDAS_AB292682	CBIO2.chr7	95.022	1386	64	3	254	1635	34570814	34569430	0	2172	34569430	34570814	266171	434820	Partial	-
	query	target	pident	length	mismatch	gaps	qstart	qend	tstart	tend	evalue	bitscore	start	end	down	up	type	direction
0	CBDAS	CHM9.00004840	91.4	1628	135	5	1	1627	7649893	7651516	0	2226	7649893	7651516	13446	90189	Partial	+
1	CBDAS	CHM9.00004840	91.376	1635	138	1	1	1635	7801228	7799597	0	2235	7799597	7801228	16726	416	Partial	-
2	CBDAS	CHM9.00004840	92.427	1611	122	0	25	1635	7852653	7851043	0	2300	7851043	7852653	26030	433	Partial	-
3	CBDAS	CHM9.00004840	89.744	1638	159	3	1	1635	7852671	7851040	0	2085	7851040	7852671	26027	415	Partial	-
4	CBDAS	CHM9.00004840	92.171	1635	128	0	1	1635	7889056	7887422	0	2311	7887422	7889056	22233	417	Partial	-
5	CBDAS	CHM9.00004840	91.865	1635	133	0	1	1635	7941593	7939959	0	2283	7939959	7941593	25886	416	Partial	-
6	THCAS	CHM9.00004840	99.939	1635	1	0	1	1635	8633377	8631743	0	3014	8631743	8633377	86507	83722	Full	-
7	CBDAS	CHM9.00004840	93.887	867	44	4	1	863	8755150	8756011	0	1299	8755150	8756011	8344	70360	Partial	+
8	CBDAS	CHM9.00004840	94.065	775	45	1	858	1632	8765474	8766247	0	1175	8765474	8766247	18668	60124	Partial	+
9	CBDAS	CHM9.00004840	93.712	1638	94	4	1	1635	8845319	8846950	0	2446	8845319	8846950	14929	24134	Partial	+
10	CBDAS	CHM9.00004840	94.814	1639	76	4	1	1635	8938526	8940159	0	2547	8938526	8940159	6795	46890	Partial	+
11	CBDAS	CHM9.00004840	92.506	1628	111	4	9	1635	9203445	9205062	0	2320	9203445	9205062	8159	30069	Partial	+
	query	target	pident	length	mismatch	gaps	qstart	qend	tstart	tend	evalue	bitscore	start	end	down	up	type	direction
0	CBDAS	CHMD3.00003889	92.506	1628	111	4	9	1635	10961563	10959946	0	2320	10959946	10961563	167401	8194	Partial	-
1	CBDAS	CHMD3.00003889	95.022	1386	64	3	254	1635	11234984	11233600	0	2172	11233600	11234984	46888	7009	Partial	-
2	CBDAS	CHMD3.00003889	93.59	1638	96	4	1	1635	11335320	11333689	0	2435	11333689	11335320	58300	89286	Partial	-
3	CBDAS	CHMD3.00003889	87.581	773	90	6	865	1635	11398711	11397943	0	891	11397943	11398711	122554	25895	Partial	-
4	CBDAS	CHMD3.00003889	93.702	778	47	2	858	1635	11398715	11397940	0	1164	11397940	11398715	122551	25891	Partial	-
5	CBDAS	CHMD3.00003889	93.887	867	44	4	1	863	11416261	11415400	0	1299	11415400	11416261	140011	8345	Partial	-
6	THCAS	CHMD3.00003889	100	1635	0	0	1	1635	11536227	11537861	0	3020	11536227	11537861	90124	92695	Full	+
7	CBDAS	CHMD3.00003889	91.865	1635	133	0	1	1635	12250875	12252509	0	2283	12250875	12252509	416	25885	Partial	+
8	CBDAS	CHMD3.00003889	92.294	1635	126	0	1	1635	12303817	12305451	0	2322	12303817	12305451	417	17771	Partial	+
9	CBDAS	CHMD3.00003889	89.805	1638	158	3	1	1635	12345140	12346771	0	2091	12345140	12346771	415	26026	Partial	+
10	CBDAS	CHMD3.00003889	92.441	1614	122	0	22	1635	12345155	12346768	0	2305	12345155	12346768	430	26029	Partial	+
11	CBDAS	CHMD3.00003889	91.376	1635	138	1	1	1635	12396586	12398217	0	2235	12396586	12398217	416	348235	Partial	+
12	THCAS	CHMD3.00003889	91.31	1634	137	5	1	1633	12540862	12539233	0	2226	12539233	12540862	143063	205590	Partial	-
	query	target	pident	length	mismatch	gaps	qstart	qend	tstart	tend	evalue	bitscore	start	end	down	up	type	direction
0	CBDAS	CHMD5.00001461	92.383	1628	113	4	9	1635	805876	804259	0	2309	804259	805876	102764	19100	Partial	-
1	CBDAS	CHMD5.00001461	94.814	1639	76	4	1	1635	1076417	1074784	0	2547	1074784	1076417	46898	8567	Partial	-
2	CBDAS	CHMD5.00001461	93.651	1638	94	5	1	1635	1220608	1218978	0	2440	1218978	1220608	34427	14913	Partial	-
3	CBDAS	CHMD5.00001461	87.581	773	91	5	865	1635	1289642	1288873	0	891	1288873	1289642	23829	18650	Partial	-
4	CBDAS	CHMD5.00001461	93.83	778	47	1	858	1635	1289646	1288870	0	1170	1288870	1289646	23826	18646	Partial	-
5	CBDAS	CHMD5.00001461	93.772	867	45	4	1	863	1299948	1299087	0	1293	1299087	1299948	34043	8344	Partial	-
6	THCAS	CHMD5.00001461	100	1635	0	0	1	1635	1419923	1421557	0	3020	1419923	1421557	36150	32476	Full	+
7	CBDAS	CHMD5.00001461	91.865	1635	133	0	1	1635	2131944	2133578	0	2283	2131944	2133578	416	25884	Partial	+
8	CBDAS	CHMD5.00001461	92.232	1635	127	0	1	1635	2184860	2186494	0	2316	2184860	2186494	417	22232	Partial	+
9	CBDAS	CHMD5.00001461	89.805	1638	158	3	1	1635	2226207	2227838	0	2091	2226207	2227838	416	23411	Partial	+
10	CBDAS	CHMD5.00001461	92.441	1614	122	0	22	1635	2226222	2227835	0	2305	2226222	2227835	431	23414	Partial	+
11	CBDAS	CHMD5.00001461	91.376	1635	138	1	1	1635	2287856	2289487	0	2235	2287856	2289487	416	44550	Partial	+
12	THCAS	CHMD5.00002662	91.4	1628	135	5	1	1627	7913523	7915146	0	2226	7913523	7915146	164998	143072	Partial	+
13	CBDAS	CHMD5.00002662	91.376	1635	138	1	1	1635	8057802	8056171	0	2235	8056171	8057802	307646	416	Partial	-
14	CBDAS	CHMD5.00002662	92.489	1611	121	0	25	1635	8109230	8107620	0	2305	8107620	8109230	26029	433	Partial	-
15	CBDAS	CHMD5.00002662	89.805	1638	158	3	1	1635	8109248	8107617	0	2091	8107617	8109248	26026	415	Partial	-
16	CBDAS	CHMD5.00002662	92.294	1635	126	0	1	1635	8150571	8148937	0	2322	8148937	8150571	22232	417	Partial	-
17	CBDAS	CHMD5.00002662	91.865	1635	133	0	1	1635	8203513	8201879	0	2283	8201879	8203513	25885	416	Partial	-
18	THCAS	CHMD5.00002662	100	1635	0	0	1	1635	8918162	8916528	0	3020	8916528	8918162	92695	90124	Full	-
19	CBDAS	CHMD5.00002662	93.887	867	44	4	1	863	9038128	9038989	0	1299	9038128	9038989	8345	66779	Partial	+
20	CBDAS	CHMD5.00002662	93.806	775	46	2	858	1632	9055674	9056446	0	1164	9055674	9056446	25891	49322	Partial	+
21	CBDAS	CHMD5.00002662	93.59	1638	96	4	1	1635	9119069	9120700	0	2435	9119069	9120700	8572	58300	Partial	+
22	CBDAS	CHMD5.00002662	95.022	1386	64	3	254	1635	9219405	9220789	0	2172	9219405	9220789	7009	46886	Partial	+
23	CBDAS	CHMD5.00002662	92.506	1628	111	4	9	1635	9492823	9494440	0	2320	9492823	9494440	8194	167401	Partial	+
	query	target	pident	length	mismatch	gaps	qstart	qend	tstart	tend	evalue	bitscore	start	end	down	up	type	direction
0	CBDAS	CNBv1a.000120	91.467	1418	117	4	211	1627	511519	512933	0	1945	511519	512933	80969	35100	Partial	+
1	CBDAS	CNBv1a.000120	92.543	1636	120	2	1	1635	676680	675046	0	2344	675046	676680	125687	416	Partial	-
2	CBDAS	CNBv1a.000120	87.253	557	71	0	1079	1635	719730	719174	3.68e-180	636	719174	719730	15943	1462	Partial	-
3	CBDAS	CNBv1a.000120	92.613	555	41	0	1081	1635	719731	719177	0	798	719177	719731	15946	1461	Partial	-
4	CBDAS	CNBv1a.000120	92.65	1034	76	0	1	1034	720776	719743	0	1489	719743	720776	16512	416	Partial	-
5	CBDAS	CNBv1a.000120	92.171	1635	127	1	1	1635	769488	767855	0	2309	767855	769488	24325	417	Partial	-
6	CBDAS	CNBv1a.000120	92.232	1635	127	0	1	1635	822846	821212	0	2316	821212	822846	27333	416	Partial	-
7	THCAS	CNBv1a.000120	99.817	1635	3	0	1	1635	1384507	1382873	0	3003	1382873	1384507	118480	211210	Full	-
8	Cannabis_sativa_CBDAS_AB292682	CNBv1a.000120	94.495	1635	83	3	1	1632	1483937	1485567	0	2514	1483937	1485567	219544	110150	Partial	+
9	Cannabis_sativa_CBDAS_AB292682	CNBv1a.000120	94.444	1638	82	4	1	1635	1524614	1526245	0	2512	1524614	1526245	260221	69472	Partial	+
10	CBDAS	CNBv1a.000120	93.059	1628	111	2	9	1635	1825940	1827566	0	2379	1825940	1827566	65068	48617	Partial	+
	query	target	pident	length	mismatch	gaps	qstart	qend	tstart	tend	evalue	bitscore	start	end	down	up	type	direction
0	THCAS	CNBv1b.000246	91.185	1418	121	4	211	1627	315512	316926	0	1923	315512	316926	165936	66737	Partial	+
1	CBDAS	CNBv1b.000246	92.11	1635	128	1	1	1635	442897	441264	0	2303	441264	442897	54159	416	Partial	-
2	CBDAS	CNBv1b.000246	92.294	1635	122	1	1	1635	548142	546512	0	2318	546512	548142	64664	417	Partial	-
3	CBDAS	CNBv1b.000246	92.477	1635	123	0	1	1635	579008	577374	0	2338	577374	579008	15983	417	Partial	-
4	CBDAS	CNBv1b.000246	92.294	1635	126	0	1	1635	638608	636974	0	2322	636974	638608	2176	416	Partial	-
5	THCAS	CNBv1b.000246	99.694	1635	5	0	1	1635	1424545	1422911	0	2992	1422911	1424545	165407	184876	Full	-
6	Cannabis_sativa_CBDAS_AB292682	CNBv1b.000246	94.136	1637	87	4	1	1632	1544229	1545861	0	2483	1544229	1545861	286725	63560	Partial	+
7	CBDAS	CNBv1b.000246	94.2	1638	87	3	1	1635	1631540	1633172	0	2492	1631540	1633172	11589	2305	Partial	+
8	CBDAS	CNBv1b.000246	94.872	1638	77	2	1	1635	1676214	1677847	0	2553	1676214	1677847	25312	392521	Partial	+
	query	target	pident	length	mismatch	gaps	qstart	qend	tstart	tend	evalue	bitscore	start	end	down	up	type	direction
0	CBDAS	COFBa.chr7	92.506	1628	111	4	9	1635	11216957	11215340	0	2320	11215340	11216957	174153	8159	Partial	-
1	CBDAS	COFBa.chr7	94.814	1639	76	4	1	1635	11481876	11480243	0	2547	11480243	11481876	46890	6795	Partial	-
2	CBDAS	COFBa.chr7	93.712	1638	94	4	1	1635	11575083	11573452	0	2446	11573452	11575083	58391	14929	Partial	-
3	CBDAS	COFBa.chr7	87.71	773	90	5	865	1635	11654924	11654155	0	896	11654155	11654924	60124	18672	Partial	-
4	CBDAS	COFBa.chr7	93.959	778	46	1	858	1635	11654928	11654152	0	1175	11654152	11654928	60121	18668	Partial	-
5	CBDAS	COFBa.chr7	93.887	867	44	4	1	863	11665252	11664391	0	1299	11664391	11665252	70360	8344	Partial	-
6	THCAS	COFBa.chr7	99.878	1635	2	0	1	1635	11787028	11788662	0	3009	11787028	11788662	83725	-173	Full	+
7	CBDAS	COFBa.chr7	91.865	1635	133	0	1	1635	12489118	12490752	0	2283	12489118	12490752	416	25482	Partial	+
8	CBDAS	COFBa.chr7	92.171	1635	128	0	1	1635	12541655	12543289	0	2311	12541655	12543289	417	22233	Partial	+
9	CBDAS	COFBa.chr7	89.744	1638	159	3	1	1635	12578040	12579671	0	2085	12578040	12579671	415	26027	Partial	+
10	CBDAS	COFBa.chr7	92.379	1614	123	0	22	1635	12578055	12579668	0	2300	12578055	12579668	430	26030	Partial	+
11	CBDAS	COFBa.chr7	91.376	1635	138	1	1	1635	12629484	12631115	0	2235	12629484	12631115	416	304729	Partial	+
12	THCAS	COFBa.chr7	91.31	1634	137	5	1	1633	12780820	12779191	0	2226	12779191	12780820	150123	155024	Partial	-
	query	target	pident	length	mismatch	gaps	qstart	qend	tstart	tend	evalue	bitscore	start	end	down	up	type	direction
0	CBCAS	COFBb.chr7	99.817	1635	3	0	1	1635	37076580	37078214	0	3003	37076580	37078214	86569	126243	Full	+
1	CBCAS	COFBb.chr7	99.755	1635	4	0	1	1635	37152209	37153843	0	2998	37152209	37153843	162198	50614	Full	+
2	CBCAS	COFBb.chr7	99.755	1635	4	0	1	1635	37210458	37212092	0	2998	37210458	37212092	4078	130827	Full	+
3	CBCAS	COFBb.chr7	99.694	1635	5	0	1	1635	37325256	37326890	0	2992	37325256	37326890	118876	16029	Full	+
4	CBDAS	COFBb.chr7	99.633	1636	5	1	1	1635	37388937	37390572	0	2987	37388937	37390572	1955	609309	Partial	+
5	CBCAS	COFBb.chr7	99.817	1635	3	0	1	1635	37426965	37428599	0	3003	37426965	37428599	39983	571282	Full	+
6	CBCAS	COFBb.chr7	99.817	1635	3	0	1	1635	37487270	37488904	0	3003	37487270	37488904	100288	510977	Full	+
7	CBCAS	COFBb.chr7	99.939	1635	1	0	1	1635	37538373	37540007	0	3014	37538373	37540007	151391	459874	Full	+
8	THCAS	COFBb.chr7	91.4	1628	135	5	1	1627	55788004	55789627	0	2226	55788004	55789627	61620	136439	Partial	+
9	CBDAS	COFBb.chr7	92.355	1635	125	0	1	1635	55910906	55909272	0	2327	55909272	55910906	182888	15160	Partial	-
10	CBDAS	COFBb.chr7	92.171	1635	128	0	1	1635	55925648	55924014	0	2311	55924014	55925648	197630	418	Partial	-
11	THCAS	COFBb.chr7	99.694	1635	5	0	1	1635	56445672	56444038	0	2992	56444038	56445672	95210	74535	Full	-
12	CBDAS	COFBb.chr7	94.312	1635	85	4	1	1632	56568688	56570317	0	2497	56568688	56570317	30564	101074	Partial	+
13	CBDAS	COFBb.chr7	94.567	1638	81	3	1	1635	56615316	56616948	0	2525	56615316	56616948	77192	54443	Partial	+
14	CBDAS	COFBb.chr7	95.078	1544	69	2	95	1635	56725973	56727512	0	2423	56725973	56727512	28362	50091	Partial	+
15	CBDAS	COFBb.chr7	93.12	1628	110	2	9	1635	57132936	57134562	0	2385	57132936	57134562	283303	56221	Partial	+
	query	target	pident	length	mismatch	gaps	qstart	qend	tstart	tend	evalue	bitscore	start	end	down	up	type	direction
0	CBCAS	COSVa.chr7	99.817	1635	3	0	1	1635	37922358	37923992	0	3003	37922358	37923992	277691	302589	Full	+
1	CBCAS	COSVa.chr7	99.755	1635	4	0	1	1635	37997987	37999621	0	2998	37997987	37999621	353320	226960	Full	+
2	CBCAS	COSVa.chr7	99.755	1635	4	0	1	1635	38056236	38057870	0	2998	38056236	38057870	411569	168711	Full	+
3	CBCAS	COSVa.chr7	99.694	1635	5	0	1	1635	38171032	38172666	0	2992	38171032	38172666	526365	53915	Full	+
4	CBDAS	COSVa.chr7	99.633	1636	5	1	1	1635	38234713	38236348	0	2987	38234713	38236348	1955	46741	Partial	+
5	CBCAS	COSVa.chr7	99.817	1635	3	0	1	1635	38272741	38274375	0	3003	38272741	38274375	39983	8714	Full	+
6	CBCAS	COSVa.chr7	99.817	1635	3	0	1	1635	38333046	38334680	0	3003	38333046	38334680	41768	512511	Full	+
7	CBCAS	COSVa.chr7	99.939	1635	1	0	1	1635	38384149	38385783	0	3014	38384149	38385783	92871	461408	Full	+
8	THCAS	COSVa.chr7	91.4	1628	135	5	1	1627	56048141	56049764	0	2226	56048141	56049764	60503	136440	Partial	+
9	CBDAS	COSVa.chr7	92.355	1635	125	0	1	1635	56171044	56169410	0	2327	56169410	56171044	181772	15160	Partial	-
10	CBDAS	COSVa.chr7	92.171	1635	128	0	1	1635	56185786	56184152	0	2311	56184152	56185786	196514	418	Partial	-
11	THCAS	COSVa.chr7	99.694	1635	5	0	1	1635	56705804	56704170	0	2992	56704170	56705804	95210	74535	Full	-
12	CBDAS	COSVa.chr7	94.312	1635	85	4	1	1632	56828820	56830449	0	2497	56828820	56830449	30564	101074	Partial	+
13	CBDAS	COSVa.chr7	94.567	1638	81	3	1	1635	56875448	56877080	0	2525	56875448	56877080	77192	54443	Partial	+
14	CBDAS	COSVa.chr7	95.078	1544	69	2	95	1635	56986105	56987644	0	2423	56986105	56987644	28362	50091	Partial	+
15	CBDAS	COSVa.chr7	93.12	1628	110	2	9	1635	57393068	57394694	0	2385	57393068	57394694	79757	56220	Partial	+
	query	target	pident	length	mismatch	gaps	qstart	qend	tstart	tend	evalue	bitscore	start	end	down	up	type	direction
0	CBDAS	COSVb.chr7	100	1635	0	0	1	1635	11910082	11908448	0	3020	11908448	11910082	10280	-3823	Full	-
1	CBDAS	COSVb.chr7	91.927	1635	132	0	1	1635	12567247	12568881	0	2289	12567247	12568881	416	15962	Partial	+
2	CBDAS	COSVb.chr7	92.538	1635	122	0	1	1635	12597642	12599276	0	2344	12597642	12599276	416	24288	Partial	+
3	CBDAS	COSVb.chr7	92.416	1635	124	0	1	1635	12631985	12633619	0	2333	12631985	12633619	416	14537	Partial	+
4	CBDAS	COSVb.chr7	92.416	1635	124	0	1	1635	12691235	12692869	0	2333	12691235	12692869	416	14061	Partial	+
5	CBDAS	COSVb.chr7	91.327	980	83	2	657	1635	12723232	12724210	0	1338	12723232	12724210	3638	111433	Partial	+
6	CBDAS	COSVb.chr7	91.298	1425	118	6	211	1633	12849636	12848216	0	1940	12848216	12849636	11416	151013	Partial	-
7	CBCAS	COSVb.chr7	99.939	1635	1	0	1	1635	29451132	29449498	0	3014	29449498	29451132	37620	88284	Full	-
8	CBCAS	COSVb.chr7	99.878	1635	2	0	1	1635	29539012	29537378	0	3009	29537378	29539012	125500	404	Full	-
9	CBDAS	COSVb.chr7	99.756	1636	3	1	1	1635	29586860	29585225	0	2998	29585225	29586860	37425	323763	Partial	-
10	CBCAS	COSVb.chr7	99.878	1635	2	0	1	1635	29650884	29649250	0	3009	29649250	29650884	101450	259739	Full	-
11	CBCAS	COSVb.chr7	99.571	1166	5	0	1	1166	29724519	29723354	0	2126	29723354	29724519	175554	186104	Full	-
12	CBCAS	COSVb.chr7	99.633	1635	6	0	1	1635	29770852	29769218	0	2987	29769218	29770852	221418	139771	Full	-
13	CBCAS	COSVb.chr7	99.572	1635	7	0	1	1635	29827428	29825794	0	2981	29825794	29827428	277994	83195	Full	-
	query	target	pident	length	mismatch	gaps	qstart	qend	tstart	tend	evalue	bitscore	start	end	down	up	type	direction
0	CBDAS	CST53.00002367	91.467	668	57	0	1	668	922415	923082	0	918	922415	923082	87130	11859	Partial	+
1	CBDAS	CST53.00002367	91.988	1635	131	0	1	1635	934525	932891	0	2294	932891	934525	97606	416	Partial	-
2	CBDAS	CST53.00002367	91.76	1614	133	0	22	1635	991224	989611	0	2244	989611	991224	35595	439	Partial	-
3	CBDAS	CST53.00002367	89.384	1639	169	4	1	1635	991245	989608	0	2058	989608	991245	35592	418	Partial	-
4	CBDAS	CST53.00002367	99.511	1635	8	0	1	1635	1760781	1762415	0	2976	1760781	1762415	16447	27323	Full	+
5	CBDAS	CST53.00002239	91.4	1628	135	5	1	1627	1364239	1365862	0	2226	1364239	1365862	6947	110032	Partial	+
6	CBDAS	CST53.00002239	91.376	1635	138	1	1	1635	1508515	1506884	0	2235	1506884	1508515	4059	416	Partial	-
7	CBDAS	CST53.00002239	92.489	1611	121	0	25	1635	1559945	1558335	0	2305	1558335	1559945	5582	433	Partial	-
8	CBDAS	CST53.00002239	89.805	1638	158	3	1	1635	1559963	1558332	0	2091	1558332	1559963	5579	415	Partial	-
9	CBDAS	CST53.00002239	92.294	1635	126	0	1	1635	1601286	1599652	0	2322	1599652	1601286	22232	417	Partial	-
10	CBDAS	CST53.00002239	91.865	1635	133	0	1	1635	1654228	1652594	0	2283	1652594	1654228	4907	416	Partial	-
11	THCAS	CST53.00002239	100	1635	0	0	1	1635	2368879	2367245	0	3020	2367245	2368879	-1018	90124	Full	-
12	CBDAS	CST53.00002239	93.887	867	44	4	1	863	2488845	2489706	0	1299	2488845	2489706	8345	23250	Partial	+
13	CBDAS	CST53.00002239	93.806	775	46	2	858	1632	2506391	2507163	0	1164	2506391	2507163	25891	5793	Partial	+
14	CBDAS	CST53.00002239	93.59	1638	96	4	1	1635	2569786	2571417	0	2435	2569786	2571417	47788	58301	Partial	+
	query	target	pident	length	mismatch	gaps	qstart	qend	tstart	tend	evalue	bitscore	start	end	down	up	type	direction
0	CBDAS	CST8.00001720	99.511	1635	8	0	1	1635	11895070	11893436	0	2976	11893436	11895070	59175	65657	Full	-
1	CBDAS	CST8.00001720	91.437	1635	140	0	1	1635	12664595	12666229	0	2244	12664595	12666229	418	35595	Partial	+
2	CBDAS	CST8.00001720	91.988	1635	131	0	1	1635	12721308	12722942	0	2294	12721308	12722942	416	50302	Partial	+
3	CBDAS	CST8.00001720	91.467	668	57	0	1	668	12733418	12732751	0	918	12732751	12733418	11859	39826	Partial	-
	query	target	pident	length	mismatch	gaps	qstart	qend	tstart	tend	evalue	bitscore	start	end	down	up	type	direction
0	CBDAS	DCHCC.00001497	100	1635	0	0	1	1635	4466544	4464910	0	3020	4464910	4466544	10280	32931	Full	-
1	CBDAS	DCHCC.00001497	91.927	1635	132	0	1	1635	5123704	5125338	0	2289	5123704	5125338	416	15962	Partial	+
2	CBDAS	DCHCC.00001497	92.538	1635	122	0	1	1635	5154099	5155733	0	2344	5154099	5155733	416	24288	Partial	+
3	CBDAS	DCHCC.00001497	92.416	1635	124	0	1	1635	5188442	5190076	0	2333	5188442	5190076	416	9465	Partial	+
4	CBDAS	DCHCC.00001497	92.416	1635	124	0	1	1635	5247691	5249325	0	2333	5247691	5249325	416	14061	Partial	+
5	CBDAS	DCHCC.00001497	91.327	980	83	2	657	1635	5279688	5280666	0	1338	5279688	5280666	3638	12274	Partial	+
6	THCAS	DCHCC.00001497	91.298	1425	118	6	211	1633	5406092	5404672	0	1940	5404672	5406092	108535	166781	Partial	-
7	CBCAS	DCHCC.00001437	99.572	1635	7	0	1	1635	3228251	3229885	0	2981	3228251	3229885	62348	263541	Full	+
8	CBCAS	DCHCC.00001437	99.633	1635	6	0	1	1635	3284827	3286461	0	2987	3284827	3286461	118924	206965	Full	+
9	CBCAS	DCHCC.00001437	99.827	1157	2	0	1	1157	3331160	3332316	0	2126	3331160	3332316	165257	161110	Full	+
10	CBCAS	DCHCC.00001437	99.878	1635	2	0	1	1635	3404795	3406429	0	3009	3404795	3406429	238892	86997	Full	+
11	CBDAS	DCHCC.00001437	99.756	1636	3	1	1	1635	3468818	3470453	0	2998	3468818	3470453	302915	22973	Partial	+
12	CBCAS	DCHCC.00001437	99.878	1635	2	0	1	1635	3516666	3518300	0	3009	3516666	3518300	9000	835	Full	+
13	CBCAS	DCHCC.00001437	99.939	1635	1	0	1	1635	3604546	3606180	0	3014	3604546	3606180	75182	-620	Full	+
	query	target	pident	length	mismatch	gaps	qstart	qend	tstart	tend	evalue	bitscore	start	end	down	up	type	direction
0	THCAS	DPFBa.chr7	91.4	1628	135	5	1	1627	57425228	57426851	0	2226	57425228	57426851	60926	136445	Partial	+
1	CBDAS	DPFBa.chr7	92.355	1635	125	0	1	1635	57548136	57546502	0	2327	57546502	57548136	182200	15160	Partial	-
2	CBDAS	DPFBa.chr7	92.171	1635	128	0	1	1635	57562878	57561244	0	2311	57561244	57562878	196942	418	Partial	-
3	THCAS	DPFBa.chr7	99.878	1635	2	0	1	1635	58162430	58160796	0	3009	58160796	58162430	141094	205332	Full	-
4	Cannabis_sativa_CBDAS_AB292682	DPFBa.chr7	94.434	1635	84	3	1	1632	58255956	58257586	0	2508	58255956	58257586	236254	110176	Partial	+
5	Cannabis_sativa_CBDAS_AB292682	DPFBa.chr7	94.444	1638	82	4	1	1635	58296717	58298348	0	2512	58296717	58298348	277015	69414	Partial	+
6	CBCAS	DPFBa.chr7	92.998	1628	112	2	9	1635	58594070	58595696	0	2374	58594070	58595696	67590	68252	Partial	+
	query	target	pident	length	mismatch	gaps	qstart	qend	tstart	tend	evalue	bitscore	start	end	down	up	type	direction
0	CBDAS	DPFBb.chr7	92.506	1628	111	4	9	1635	11308787	11307170	0	2320	11307170	11308787	174153	8159	Partial	-
1	CBDAS	DPFBb.chr7	94.814	1639	76	4	1	1635	11573706	11572073	0	2547	11572073	11573706	13434	6795	Partial	-
2	CBDAS	DPFBb.chr7	93.712	1638	94	4	1	1635	11666913	11665282	0	2446	11665282	11666913	58391	14929	Partial	-
3	CBDAS	DPFBb.chr7	87.71	773	90	5	865	1635	11746754	11745985	0	896	11745985	11746754	60124	18672	Partial	-
4	CBDAS	DPFBb.chr7	93.959	778	46	1	858	1635	11746758	11745982	0	1175	11745982	11746758	60121	18668	Partial	-
5	CBDAS	DPFBb.chr7	93.887	867	44	4	1	863	11757082	11756221	0	1299	11756221	11757082	70360	8344	Partial	-
6	THCAS	DPFBb.chr7	99.878	1635	2	0	1	1635	11878858	11880492	0	3009	11878858	11880492	83725	86509	Full	+
7	CBDAS	DPFBb.chr7	91.865	1635	133	0	1	1635	12580948	12582582	0	2283	12580948	12582582	416	25886	Partial	+
8	CBDAS	DPFBb.chr7	92.171	1635	128	0	1	1635	12633489	12635123	0	2311	12633489	12635123	417	22233	Partial	+
9	CBDAS	DPFBb.chr7	89.744	1638	159	3	1	1635	12669874	12671505	0	2085	12669874	12671505	415	26027	Partial	+
10	CBDAS	DPFBb.chr7	92.379	1614	123	0	22	1635	12669889	12671502	0	2300	12669889	12671502	430	26030	Partial	+
11	CBDAS	DPFBb.chr7	91.376	1635	138	1	1	1635	12721318	12722949	0	2235	12721318	12722949	416	76048	Partial	+
12	CBDAS	DPFBb.chr7	91.31	1634	137	5	1	1633	12872654	12871025	0	2226	12871025	12872654	8656	130562	Partial	-
	query	target	pident	length	mismatch	gaps	qstart	qend	tstart	tend	evalue	bitscore	start	end	down	up	type	direction
0	THCAS	DPSVa.chr7	91.4	1628	135	5	1	1627	57281813	57283436	0	2226	57281813	57283436	60925	121085	Partial	+
1	CBDAS	DPSVa.chr7	92.355	1635	125	0	1	1635	57404721	57403087	0	2327	57403087	57404721	182199	-200	Partial	-
2	CBDAS	DPSVa.chr7	92.171	1635	128	0	1	1635	57419463	57417829	0	2311	57417829	57419463	11972	418	Partial	-
3	THCAS	DPSVa.chr7	99.878	1635	2	0	1	1635	58019006	58017372	0	3009	58017372	58019006	15895	205332	Full	-
4	Cannabis_sativa_CBDAS_AB292682	DPSVa.chr7	94.434	1635	84	3	1	1632	58112532	58114162	0	2508	58112532	58114162	111055	110176	Partial	+
5	Cannabis_sativa_CBDAS_AB292682	DPSVa.chr7	94.444	1638	82	4	1	1635	58153293	58154924	0	2512	58153293	58154924	151816	69414	Partial	+
6	CBCAS	DPSVa.chr7	92.998	1628	112	2	9	1635	58450645	58452271	0	2374	58450645	58452271	141755	68252	Partial	+
	query	target	pident	length	mismatch	gaps	qstart	qend	tstart	tend	evalue	bitscore	start	end	down	up	type	direction
0	CBDAS	DPSVb.chr7	100	1635	0	0	1	1635	12231359	12229725	0	3020	12229725	12231359	10280	32931	Full	-
1	CBDAS	DPSVb.chr7	91.927	1635	132	0	1	1635	12888519	12890153	0	2289	12888519	12890153	416	15962	Partial	+
2	CBDAS	DPSVb.chr7	92.538	1635	122	0	1	1635	12918914	12920548	0	2344	12918914	12920548	416	24288	Partial	+
3	CBDAS	DPSVb.chr7	92.416	1635	124	0	1	1635	12953257	12954891	0	2333	12953257	12954891	416	14537	Partial	+
4	CBDAS	DPSVb.chr7	92.416	1635	124	0	1	1635	13012506	13014140	0	2333	13012506	13014140	416	14061	Partial	+
5	CBDAS	DPSVb.chr7	91.327	980	83	2	657	1635	13044503	13045481	0	1338	13044503	13045481	3638	292208	Partial	+
6	THCAS	DPSVb.chr7	91.298	1425	118	6	211	1633	13170907	13169487	0	1940	13169487	13170907	128622	166782	Partial	-
7	CBCAS	DPSVb.chr7	99.939	1635	1	0	1	1635	29627952	29626318	0	3014	29626318	29627952	6916	173011	Full	-
8	CBCAS	DPSVb.chr7	99.878	1635	2	0	1	1635	29715832	29714198	0	3009	29714198	29715832	94796	85131	Full	-
9	CBDAS	DPSVb.chr7	99.756	1636	3	1	1	1635	29763680	29762045	0	2998	29762045	29763680	142643	37283	Partial	-
10	CBCAS	DPSVb.chr7	99.878	1635	2	0	1	1635	29827703	29826069	0	3009	29826069	29827703	21680	30834	Full	-
11	CBCAS	DPSVb.chr7	99.571	1166	5	0	1	1166	29901338	29900173	0	2126	29900173	29901338	38150	16310	Full	-
12	CBCAS	DPSVb.chr7	99.633	1635	6	0	1	1635	29947671	29946037	0	2987	29946037	29947671	20069	139771	Full	-
13	CBCAS	DPSVb.chr7	99.572	1635	7	0	1	1635	30004247	30002613	0	2981	30002613	30004247	76645	83195	Full	-
	query	target	pident	length	mismatch	gaps	qstart	qend	tstart	tend	evalue	bitscore	start	end	down	up	type	direction
0	THCAS	DRBP.00001178	92.808	1613	116	0	15	1627	425352	423740	0	2337	423740	425352	70845	141762	Partial	-
1	CBCAS	DRBP.00001178	92.998	1628	112	2	9	1635	425358	423732	0	2374	423732	425358	70837	141756	Partial	-
2	Cannabis_sativa_CBDAS_AB292682	DRBP.00001178	94.444	1638	82	4	1	1635	722711	721080	0	2512	721080	722711	69414	69135	Partial	-
3	CBDAS	DRBP.00001178	94.383	1638	85	3	1	1635	763472	761839	0	2508	761839	763472	110173	28374	Partial	-
4	THCAS	DRBP.00001178	99.878	1635	2	0	1	1635	856999	858633	0	3009	856999	858633	61102	143510	Full	+
	query	target	pident	length	mismatch	gaps	qstart	qend	tstart	tend	evalue	bitscore	start	end	down	up	type	direction
0	CBDAS	EH23a.chr7	92.322	1628	114	4	9	1635	10729382	10727765	0	2303	10727765	10729382	293586	8158	Partial	-
1	CBDAS	EH23a.chr7	94.814	1639	76	4	1	1635	11000018	10998385	0	2547	10998385	11000018	46900	8567	Partial	-
2	CBDAS	EH23a.chr7	93.712	1638	94	4	1	1635	11144210	11142579	0	2446	11142579	11144210	100598	14913	Partial	-
3	CBDAS	EH23a.chr7	87.581	773	91	5	865	1635	11216218	11215449	0	891	11215449	11216218	52316	18650	Partial	-
4	CBDAS	EH23a.chr7	93.83	778	47	1	858	1635	11216222	11215446	0	1170	11215446	11216222	52313	18646	Partial	-
5	CBDAS	EH23a.chr7	93.772	867	45	4	1	863	11226524	11225663	0	1293	11225663	11226524	62530	8344	Partial	-
6	THCAS	EH23a.chr7	100	1635	0	0	1	1635	11346499	11348133	0	3020	11346499	11348133	110443	86508	Full	+
7	CBDAS	EH23a.chr7	91.865	1635	133	0	1	1635	12058485	12060119	0	2283	12058485	12060119	416	25884	Partial	+
8	CBDAS	EH23a.chr7	92.232	1635	127	0	1	1635	12111396	12113030	0	2316	12111396	12113030	417	22233	Partial	+
9	CBDAS	EH23a.chr7	89.805	1638	158	3	1	1635	12152743	12154374	0	2091	12152743	12154374	416	26027	Partial	+
10	CBDAS	EH23a.chr7	92.441	1614	122	0	22	1635	12152758	12154371	0	2305	12152758	12154371	431	26030	Partial	+
11	CBDAS	EH23a.chr7	91.376	1635	138	1	1	1635	12204189	12205820	0	2235	12204189	12205820	416	42590	Partial	+
12	CBDAS	EH23a.chr7	91.31	1634	137	5	1	1633	12355452	12353823	0	2226	12353823	12355452	96954	42300	Partial	-
13	CBCAS	EH23a.chr7	99.939	1635	1	0	1	1635	30706708	30705074	0	3014	30705074	30706708	34394	12898	Full	-
14	CBCAS	EH23a.chr7	99.878	1635	2	0	1	1635	30774874	30773240	0	3009	30773240	30774874	50149	148144	Full	-
15	CBCAS	EH23a.chr7	99.817	1635	3	0	1	1635	30824591	30822957	0	3003	30822957	30824591	99866	98427	Full	-
	query	target	pident	length	mismatch	gaps	qstart	qend	tstart	tend	evalue	bitscore	start	end	down	up	type	direction
0	CBDAS	EH23b.chr7	100	1635	0	0	1	1635	10453616	10451982	0	3020	10451982	10453616	10280	32931	Full	-
1	CBDAS	EH23b.chr7	91.927	1635	132	0	1	1635	11110780	11112414	0	2289	11110780	11112414	416	15962	Partial	+
2	CBDAS	EH23b.chr7	92.538	1635	122	0	1	1635	11141175	11142809	0	2344	11141175	11142809	416	24288	Partial	+
3	CBDAS	EH23b.chr7	92.416	1635	124	0	1	1635	11175518	11177152	0	2333	11175518	11177152	416	14537	Partial	+
4	CBDAS	EH23b.chr7	92.416	1635	124	0	1	1635	11234767	11236401	0	2333	11234767	11236401	416	14061	Partial	+
5	CBDAS	EH23b.chr7	91.327	980	83	2	657	1635	11266765	11267743	0	1338	11266765	11267743	3638	292207	Partial	+
6	THCAS	EH23b.chr7	91.298	1425	118	6	211	1633	11393169	11391749	0	1940	11391749	11393169	128622	166781	Partial	-
7	CBCAS	EH23b.chr7	99.939	1635	1	0	1	1635	28615700	28614066	0	3014	28614066	28615700	75453	319730	Full	-
8	CBCAS	EH23b.chr7	99.878	1635	2	0	1	1635	28703580	28701946	0	3009	28701946	28703580	163333	231850	Full	-
9	CBCAS	EH23b.chr7	99.756	1636	3	1	1	1635	28751428	28749793	0	2998	28749793	28751428	211180	184002	Partial	-
10	CBCAS	EH23b.chr7	99.878	1635	2	0	1	1635	28815451	28813817	0	3009	28813817	28815451	275204	119979	Full	-
11	CBCAS	EH23b.chr7	99.571	1166	5	0	1	1166	28889086	28887921	0	2126	28887921	28889086	349308	46344	Full	-
12	CBCAS	EH23b.chr7	99.633	1635	6	0	1	1635	28935419	28933785	0	2987	28933785	28935419	395172	11	Full	-
13	CBCAS	EH23b.chr7	99.572	1635	7	0	1	1635	28991995	28990361	0	2981	28990361	28991995	51289	83195	Full	-
	query	target	pident	length	mismatch	gaps	qstart	qend	tstart	tend	evalue	bitscore	start	end	down	up	type	direction
0	CBDAS	ERB.000015F	100	1635	0	0	1	1635	7550621	7548987	0	3020	7548987	7550621	10280	17130	Full	-
1	CBDAS	ERB.000015F	91.927	1635	132	0	1	1635	8207791	8209425	0	2289	8207791	8209425	416	1809	Partial	+
2	CBDAS	ERB.000015F	92.538	1635	122	0	1	1635	8238186	8239820	0	2344	8238186	8239820	416	24288	Partial	+
3	CBDAS	ERB.000015F	92.416	1635	124	0	1	1635	8272529	8274163	0	2333	8272529	8274163	416	15078	Partial	+
4	CBDAS	ERB.000015F	92.538	1635	121	1	1	1635	8331788	8333421	0	2342	8331788	8333421	416	24300	Partial	+
5	CBDAS	ERB.000015F	92.416	1635	124	0	1	1635	8366141	8367775	0	2333	8366141	8367775	416	14537	Partial	+
6	CBDAS	ERB.000015F	92.416	1635	124	0	1	1635	8425391	8427025	0	2333	8425391	8427025	416	14061	Partial	+
7	CBDAS	ERB.000015F	91.327	980	83	2	657	1635	8457389	8458367	0	1338	8457389	8458367	3638	292209	Partial	+
8	THCAS	ERB.000015F	91.298	1425	118	6	211	1633	8583794	8582374	0	1940	8582374	8583794	128623	166782	Partial	-
9	CBCAS	ERB.000018F	99.939	1635	1	0	1	1635	8984239	8982605	0	3014	8982605	8984239	58249	96112	Full	-
10	CBCAS	ERB.000018F	99.878	1635	2	0	1	1635	9072117	9070483	0	3009	9070483	9072117	146127	8234	Full	-
11	CBDAS	ERB.000018F	99.756	1636	3	1	1	1635	9119965	9118330	0	2998	9118330	9119965	33045	104926	Partial	-
12	CBCAS	ERB.000018F	99.878	1635	2	0	1	1635	9183990	9182356	0	3009	9182356	9183990	97071	40901	Full	-
13	CBCAS	ERB.000018F	99.571	1166	5	0	1	1166	9257625	9256460	0	2126	9256460	9257625	30196	124836	Full	-
14	CBCAS	ERB.000018F	99.633	1635	6	0	1	1635	9303958	9302324	0	2987	9302324	9303958	76060	78503	Full	-
15	CBCAS	ERB.000018F	99.572	1635	7	0	1	1635	9360535	9358901	0	2981	9358901	9360535	132637	21926	Full	-
	query	target	pident	length	mismatch	gaps	qstart	qend	tstart	tend	evalue	bitscore	start	end	down	up	type	direction
0	CBDAS	FB191.00000616	92.506	1628	111	4	9	1635	10826391	10824774	0	2320	10824774	10826391	174153	8159	Partial	-
1	CBDAS	FB191.00000616	94.814	1639	76	4	1	1635	11091310	11089677	0	2547	11089677	11091310	46890	6795	Partial	-
2	CBDAS	FB191.00000616	93.712	1638	94	4	1	1635	11184517	11182886	0	2446	11182886	11184517	58391	14929	Partial	-
3	CBDAS	FB191.00000616	87.71	773	90	5	865	1635	11264358	11263589	0	896	11263589	11264358	60124	18672	Partial	-
4	CBDAS	FB191.00000616	93.959	778	46	1	858	1635	11264362	11263586	0	1175	11263586	11264362	60121	18668	Partial	-
5	CBDAS	FB191.00000616	93.887	867	44	4	1	863	11274686	11273825	0	1299	11273825	11274686	70360	8344	Partial	-
6	THCAS	FB191.00000616	99.878	1635	2	0	1	1635	11396463	11398097	0	3009	11396463	11398097	83726	86507	Full	+
7	CBDAS	FB191.00000616	91.865	1635	133	0	1	1635	12098552	12100186	0	2283	12098552	12100186	416	25886	Partial	+
8	CBDAS	FB191.00000616	92.171	1635	128	0	1	1635	12151091	12152725	0	2311	12151091	12152725	417	22233	Partial	+
9	CBDAS	FB191.00000616	89.744	1638	159	3	1	1635	12187476	12189107	0	2085	12187476	12189107	415	26027	Partial	+
10	CBDAS	FB191.00000616	92.379	1614	123	0	22	1635	12187491	12189104	0	2300	12187491	12189104	430	26030	Partial	+
11	CBDAS	FB191.00000616	91.376	1635	138	1	1	1635	12238919	12240550	0	2235	12238919	12240550	416	45362	Partial	+
12	CBDAS	FB191.00000616	91.31	1634	137	5	1	1633	12390255	12388626	0	2226	12388626	12390255	9304	124105	Partial	-
	query	target	pident	length	mismatch	gaps	qstart	qend	tstart	tend	evalue	bitscore	start	end	down	up	type	direction
0	CBDAS	FB30.000012F	91.4	1628	135	5	1	1627	7697225	7698848	0	2226	7697225	7698848	146128	36419	Partial	+
1	CBDAS	FB30.000012F	91.376	1635	138	1	1	1635	7848561	7846930	0	2235	7846930	7848561	24910	416	Partial	-
2	CBDAS	FB30.000012F	92.427	1611	122	0	25	1635	7899987	7898377	0	2300	7898377	7899987	26030	433	Partial	-
3	CBDAS	FB30.000012F	89.744	1638	159	3	1	1635	7900005	7898374	0	2085	7898374	7900005	26027	415	Partial	-
4	CBDAS	FB30.000012F	92.171	1635	128	0	1	1635	7936390	7934756	0	2311	7934756	7936390	22233	417	Partial	-
5	CBDAS	FB30.000012F	91.865	1635	133	0	1	1635	7988927	7987293	0	2283	7987293	7988927	25886	416	Partial	-
6	THCAS	FB30.000012F	99.878	1635	2	0	1	1635	8691018	8689384	0	3009	8689384	8691018	86508	83725	Full	-
7	CBDAS	FB30.000012F	93.887	867	44	4	1	863	8812794	8813655	0	1299	8812794	8813655	8344	70362	Partial	+
8	CBDAS	FB30.000012F	94.065	775	45	1	858	1632	8823118	8823891	0	1175	8823118	8823891	18668	60126	Partial	+
9	CBDAS	FB30.000012F	93.712	1638	94	4	1	1635	8902965	8904596	0	2446	8902965	8904596	14929	58392	Partial	+
10	CBDAS	FB30.000012F	94.814	1639	76	4	1	1635	8996173	8997806	0	2547	8996173	8997806	6795	13498	Partial	+
11	CBDAS	FB30.000012F	92.506	1628	111	4	9	1635	9261094	9262711	0	2320	9261094	9262711	8159	164065	Partial	+
	query	target	pident	length	mismatch	gaps	qstart	qend	tstart	tend	evalue	bitscore	start	end	down	up	type	direction
0	CBDAS	FBHO.00000238	92.322	1628	114	4	9	1635	218544	216927	0	2303	216927	218544	62036	8158	Partial	-
1	CBDAS	FBHO.00000238	94.814	1639	76	4	1	1635	489183	487550	0	2547	487550	489183	-1526	683	Partial	-
2	CBDAS	FBHO.00000238	93.712	1638	94	4	1	1635	633375	631744	0	2446	631744	633375	7865	14913	Partial	-
3	CBDAS	FBHO.00000238	87.581	773	91	5	865	1635	705384	704615	0	891	704615	705384	6510	5317	Partial	-
4	CBDAS	FBHO.00000238	93.83	778	47	1	858	1635	705388	704612	0	1170	704612	705388	6507	5313	Partial	-
5	CBDAS	FBHO.00000238	93.772	867	45	4	1	863	715690	714829	0	1293	714829	715690	3305	8344	Partial	-
6	THCAS	FBHO.00000238	100	1635	0	0	1	1635	835665	837299	0	3020	835665	837299	55851	13795	Full	+
7	CBDAS	FBHO.00000201	92.506	1628	111	4	9	1635	481707	480090	0	2320	480090	481707	4911	547	Partial	-
8	CBDAS	FBHO.00000201	94.814	1639	76	4	1	1635	746629	744996	0	2547	744996	746629	19774	6795	Partial	-
9	CBDAS	FBHO.00000201	93.712	1638	94	4	1	1635	839836	838205	0	2446	838205	839836	58391	11258	Partial	-
10	CBDAS	FBHO.00000201	87.71	773	90	5	865	1635	919677	918908	0	896	918908	919677	60124	18672	Partial	-
11	CBDAS	FBHO.00000201	93.959	778	46	1	858	1635	919681	918905	0	1175	918905	919681	60121	18668	Partial	-
12	CBDAS	FBHO.00000201	93.887	867	44	4	1	863	930005	929144	0	1299	929144	930005	70360	8344	Partial	-
13	THCAS	FBHO.00000201	99.878	1635	2	0	1	1635	1051782	1053416	0	3009	1051782	1053416	72850	86506	Full	+
14	CBDAS	FBHO.00000201	91.865	1635	133	0	1	1635	1753869	1755503	0	2283	1753869	1755503	416	25886	Partial	+
15	CBDAS	FBHO.00000201	92.171	1635	128	0	1	1635	1806406	1808040	0	2311	1806406	1808040	417	22233	Partial	+
16	CBDAS	FBHO.00000201	89.744	1638	159	3	1	1635	1842791	1844422	0	2085	1842791	1844422	415	26027	Partial	+
17	CBDAS	FBHO.00000201	92.379	1614	123	0	22	1635	1842806	1844419	0	2300	1842806	1844419	430	26030	Partial	+
18	CBDAS	FBHO.00000201	91.376	1635	138	1	1	1635	1894234	1895865	0	2235	1894234	1895865	416	304729	Partial	+
19	THCAS	FBHO.00000201	91.31	1634	137	5	1	1633	2045570	2043941	0	2226	2043941	2045570	150123	155024	Partial	-
20	CBDAS	FBHO.00000205	91.4	1628	135	5	1	1627	319885	321508	0	2226	319885	321508	13948	114614	Partial	+
21	CBDAS	FBHO.00000205	91.376	1635	138	1	1	1635	471147	469516	0	2235	469516	471147	28867	416	Partial	-
22	CBDAS	FBHO.00000205	92.489	1611	121	0	25	1635	522575	520965	0	2305	520965	522575	14137	434	Partial	-
23	CBDAS	FBHO.00000205	89.805	1638	158	3	1	1635	522593	520962	0	2091	520962	522593	14134	416	Partial	-
24	CBDAS	FBHO.00000205	92.232	1635	127	0	1	1635	563940	562306	0	2316	562306	563940	22233	417	Partial	-
25	CBDAS	FBHO.00000205	91.865	1635	133	0	1	1635	616851	615217	0	2283	615217	616851	25884	416	Partial	-
	query	target	pident	length	mismatch	gaps	qstart	qend	tstart	tend	evalue	bitscore	start	end	down	up	type	direction
0	CBCAS	FCS1a.chr7	99.572	1635	7	0	1	1635	36148911	36150545	0	2981	36148911	36150545	83197	512487	Full	+
1	CBCAS	FCS1a.chr7	99.633	1635	6	0	1	1635	36205489	36207123	0	2987	36205489	36207123	139775	455909	Full	+
2	CBCAS	FCS1a.chr7	99.827	1157	2	0	1	1157	36251822	36252978	0	2126	36251822	36252978	186108	410054	Full	+
3	CBCAS	FCS1a.chr7	99.878	1635	2	0	1	1635	36325457	36327091	0	3009	36325457	36327091	259743	335941	Full	+
4	CBCAS	FCS1a.chr7	99.756	1636	3	1	1	1635	36389492	36391127	0	2998	36389492	36391127	323778	271905	Partial	+
5	CBCAS	FCS1a.chr7	99.878	1635	2	0	1	1635	36437341	36438975	0	3009	36437341	36438975	371627	224057	Full	+
6	CBCAS	FCS1a.chr7	99.878	1635	2	0	1	1635	36498069	36499703	0	3009	36498069	36499703	432355	163329	Full	+
7	CBCAS	FCS1a.chr7	99.939	1635	1	0	1	1635	36585949	36587583	0	3014	36585949	36587583	520235	75449	Full	+
8	THCAS	FCS1a.chr7	91.4	1628	135	5	1	1627	53743964	53745587	0	2226	53743964	53745587	155020	150129	Partial	+
9	CBDAS	FCS1a.chr7	91.376	1635	138	1	1	1635	53895300	53893669	0	2235	53893669	53895300	304725	416	Partial	-
10	CBDAS	FCS1a.chr7	92.427	1611	122	0	25	1635	53946724	53945114	0	2300	53945114	53946724	26030	433	Partial	-
11	CBDAS	FCS1a.chr7	89.744	1638	159	3	1	1635	53946742	53945111	0	2085	53945111	53946742	26027	415	Partial	-
12	CBDAS	FCS1a.chr7	92.171	1635	128	0	1	1635	53983127	53981493	0	2311	53981493	53983127	22233	417	Partial	-
13	CBDAS	FCS1a.chr7	91.865	1635	133	0	1	1635	54035662	54034028	0	2283	54034028	54035662	25886	416	Partial	-
14	THCAS	FCS1a.chr7	99.939	1635	1	0	1	1635	54727442	54725808	0	3014	54725808	54727442	86508	83722	Full	-
15	CBDAS	FCS1a.chr7	93.887	867	44	4	1	863	54849215	54850076	0	1299	54849215	54850076	8344	70360	Partial	+
16	CBDAS	FCS1a.chr7	94.065	775	45	1	858	1632	54859539	54860312	0	1175	54859539	54860312	18668	60124	Partial	+
17	CBDAS	FCS1a.chr7	93.773	1638	93	4	1	1635	54939384	54941015	0	2451	54939384	54941015	14929	58389	Partial	+
18	CBDAS	FCS1a.chr7	94.814	1639	76	4	1	1635	55032589	55034222	0	2547	55032589	55034222	6795	46890	Partial	+
19	CBDAS	FCS1a.chr7	92.506	1628	111	4	9	1635	55297510	55299127	0	2320	55297510	55299127	8159	176643	Partial	+
	query	target	pident	length	mismatch	gaps	qstart	qend	tstart	tend	evalue	bitscore	start	end	down	up	type	direction
0	CBDAS	FCS1b.chr7	91.402	1419	116	6	211	1627	55314684	55316098	0	1940	55314684	55316098	187477	18400	Partial	+
1	CBDAS	FCS1b.chr7	91.327	980	83	2	657	1635	55430639	55429661	0	1338	55429661	55430639	92239	3635	Partial	-
2	CBDAS	FCS1b.chr7	92.355	1635	125	0	1	1635	55472136	55470502	0	2327	55470502	55472136	14060	416	Partial	-
3	CBDAS	FCS1b.chr7	92.416	1635	124	0	1	1635	55540860	55539226	0	2333	55539226	55540860	14529	416	Partial	-
4	CBDAS	FCS1b.chr7	92.477	1635	123	0	1	1635	55580454	55578820	0	2338	55578820	55580454	16020	416	Partial	-
5	CBDAS	FCS1b.chr7	91.804	1635	134	0	1	1635	55610869	55609235	0	2278	55609235	55610869	15983	416	Partial	-
6	CBDAS	FCS1b.chr7	92.477	1635	123	0	1	1635	55674312	55672678	0	2338	55672678	55674312	38837	416	Partial	-
	query	target	pident	length	mismatch	gaps	qstart	qend	tstart	tend	evalue	bitscore	start	end	down	up	type	direction
0	THCAS	FIMv1a.000048	91.543	1419	114	6	211	1627	4796870	4798284	0	1951	4796870	4798284	166569	135777	Partial	+
1	CBDAS	FIMv1a.000048	91.327	980	83	2	657	1635	4930424	4929446	0	1338	4929446	4930424	299145	3637	Partial	-
2	CBDAS	FIMv1a.000048	92.689	1614	118	0	22	1635	4963318	4961705	0	2327	4961705	4963318	13887	437	Partial	-
3	CBDAS	FIMv1a.000048	90.11	1638	159	2	1	1635	4963339	4961702	0	2124	4961702	4963339	13884	416	Partial	-
4	CBDAS	FIMv1a.000048	92.355	1635	125	0	1	1635	5022365	5020731	0	2327	5020731	5022365	14534	416	Partial	-
5	CBDAS	FIMv1a.000048	92.538	1635	122	0	1	1635	5054962	5053328	0	2344	5053328	5054962	18122	416	Partial	-
6	CBDAS	FIMv1a.000048	91.804	1635	134	0	1	1635	5084112	5082478	0	2278	5082478	5084112	16408	416	Partial	-
7	CBDAS	FIMv1a.000048	92.538	1635	122	0	1	1635	5138129	5136495	0	2344	5136495	5138129	29370	416	Partial	-
8	Cannabis_sativa_CBDAS_AB292682	FIMv1a.000048	99.327	1635	11	0	1	1635	5727904	5729538	0	2959	5727904	5729538	312880	145540	Partial	+
9	CBDAS	FIMv1a.000048	93.366	1628	106	2	9	1635	6134947	6136573	0	2407	6134947	6136573	97819	56876	Partial	+
10	CBCAS	FIMv1a.000033	99.817	1635	3	0	1	1635	2093039	2091405	0	3003	2091405	2093039	689896	159859	Full	-
11	CBCAS	FIMv1a.000033	99.694	1635	5	0	1	1635	2180654	2179020	0	2992	2179020	2180654	777511	72244	Full	-
12	CBCAS	FIMv1a.000033	99.755	1635	4	0	1	1635	2227717	2226083	0	2998	2226083	2227717	824574	25181	Full	-
13	CBDAS	FIMv1a.000033	99.633	1636	5	1	1	1635	2285822	2284187	0	2987	2284187	2285822	27647	106576	Partial	-
14	CBCAS	FIMv1a.000033	99.789	1425	3	0	211	1635	2368889	2367465	0	2615	2367465	2368889	110925	23509	Full	-
15	CBCAS	FIMv1a.000033	99.572	1635	7	0	1	1635	2430613	2428979	0	2981	2428979	2430613	34517	82678	Full	-
16	CBDAS	FIMv1a.000033	99.542	1527	6	1	1	1526	2498085	2496559	0	2780	2496559	2498085	102097	15206	Partial	-
17	CBCAS	FIMv1a.000033	99.878	1635	2	0	1	1635	2595109	2593475	0	3009	2593475	2595109	39818	178084	Full	-
18	CBCAS	FIMv1a.000033	99.939	1635	1	0	1	1635	2663693	2662059	0	3014	2662059	2663693	108402	109500	Full	-
19	CBCAS	FIMv1a.000033	99.817	1635	3	0	1	1635	2690397	2688763	0	3003	2688763	2690397	135106	82796	Full	-
20	CBCAS	FIMv1a.000033	99.814	1078	2	0	1	1078	2693589	2692512	0	1980	2692512	2693589	138855	79604	Full	-
21	CBDAS	FIMv1a.000033	99.694	1636	4	1	1	1635	2742977	2741342	0	2992	2741342	2742977	187685	30216	Partial	-
22	CBCAS	FIMv1a.000033	99.817	1635	3	0	1	1635	2845192	2843558	0	3003	2843558	2845192	66314	12573	Full	-
23	CBCAS	FIMv1a.000033	99.755	1635	4	0	1	1635	2915384	2913750	0	2998	2913750	2915384	-5466	132034	Full	-
24	CBDAS	FIMv1a.000033	99.633	1636	5	1	1	1635	2966198	2964563	0	2987	2964563	2966198	45347	81220	Partial	-
25	CBCAS	FIMv1a.000033	99.817	1635	3	0	1	1635	3053573	3051939	0	3003	3051939	3053573	2425	-6152	Full	-
26	CBDAS	FIMv1a.000033	89.037	1122	116	5	519	1635	3128537	3127418	0	1384	3127418	3128537	4999	40017	Partial	-
27	CBCAS	FIMv1a.000033	99.822	1123	2	0	513	1635	3128543	3127421	0	2063	3127421	3128543	5002	40011	Full	-
28	CBCAS	FIMv1a.000033	99.807	517	1	0	1	517	3148027	3147511	0	950	3147511	3148027	25092	20527	Full	-
29	CBCAS	FIMv1a.000033	99.633	1635	6	0	1	1635	3208715	3207081	0	2987	3207081	3208715	21380	14306	Full	-
30	CBDAS	FIMv1a.000033	89.229	1634	169	5	7	1635	3267835	3266204	0	2036	3266204	3267835	41846	177438	Partial	-
31	CBCAS	FIMv1a.000033	99.816	1632	3	0	4	1635	3267838	3266207	0	2998	3266207	3267838	41849	177435	Full	-
	query	target	pident	length	mismatch	gaps	qstart	qend	tstart	tend	evalue	bitscore	start	end	down	up	type	direction
0	CBDAS	FIMv1b.000106	100	1635	0	0	1	1635	697386	695752	0	3020	695752	697386	91966	32935	Full	-
1	CBDAS	FIMv1b.000106	92.477	1635	123	0	1	1635	1367098	1368732	0	2338	1367098	1368732	416	38837	Partial	+
2	CBDAS	FIMv1b.000106	91.804	1635	134	0	1	1635	1430548	1432182	0	2278	1430548	1432182	416	15983	Partial	+
3	CBDAS	FIMv1b.000106	92.477	1635	123	0	1	1635	1460962	1462596	0	2338	1460962	1462596	416	16020	Partial	+
4	CBDAS	FIMv1b.000106	92.416	1635	124	0	1	1635	1500550	1502184	0	2333	1500550	1502184	416	14529	Partial	+
5	CBDAS	FIMv1b.000106	92.355	1635	125	0	1	1635	1569276	1570910	0	2327	1569276	1570910	416	14060	Partial	+
6	CBDAS	FIMv1b.000106	91.327	980	83	2	657	1635	1610775	1611753	0	1338	1610775	1611753	3635	302518	Partial	+
7	THCAS	FIMv1b.000106	91.298	1425	118	6	211	1633	1726798	1725378	0	1940	1725378	1726798	118238	187473	Partial	-
	query	target	pident	length	mismatch	gaps	qstart	qend	tstart	tend	evalue	bitscore	start	end	down	up	type	direction
0	CBDAS	FIN.0015	92.232	1635	121	3	1	1635	535563	537191	0	2311	535563	537191	413	12645	Partial	+
1	CBDAS	FIN.0015	91.498	1635	127	8	1	1635	589417	591039	0	2239	589417	591039	409	16368	Partial	+
2	CBDAS	FIN.0015	92.416	1635	121	3	1	1635	618430	620061	0	2329	618430	620061	414	18095	Partial	+
3	CBDAS	FIN.0015	92.482	1636	122	1	1	1635	650928	652563	0	2338	650928	652563	416	14508	Partial	+
4	CBDAS	FIN.0015	92.416	1635	123	1	1	1635	709761	711394	0	2331	709761	711394	416	13848	Partial	+
5	CBDAS	FIN.0015	91.327	980	82	3	657	1635	742543	743520	0	1336	742543	743520	3624	121146	Partial	+
6	CBDAS	FIN.0015	91.439	1425	116	6	211	1633	876094	874674	0	1951	874674	876094	6531	206765	Partial	-
	query	target	pident	length	mismatch	gaps	qstart	qend	tstart	tend	evalue	bitscore	start	end	down	up	type	direction
0	THCAS	FMv1a.000114	91.402	1419	116	6	211	1627	894735	896149	0	1940	894735	896149	166781	128628	Partial	+
1	CBDAS	FMv1a.000114	91.327	980	83	2	657	1635	1021139	1020161	0	1338	1020161	1021139	292207	3638	Partial	-
2	CBDAS	FMv1a.000114	92.416	1635	124	0	1	1635	1053136	1051502	0	2333	1051502	1053136	14061	416	Partial	-
3	CBDAS	FMv1a.000114	92.416	1635	124	0	1	1635	1112385	1110751	0	2333	1110751	1112385	14537	416	Partial	-
4	CBDAS	FMv1a.000114	92.538	1635	122	0	1	1635	1146728	1145094	0	2344	1145094	1146728	24288	416	Partial	-
5	CBDAS	FMv1a.000114	91.927	1635	132	0	1	1635	1177123	1175489	0	2289	1175489	1177123	15962	416	Partial	-
6	CBDAS	FMv1a.000114	100	1635	0	0	1	1635	1834284	1835918	0	3020	1834284	1835918	32930	10280	Full	+
7	CBCAS	FMv1a.000079	99.939	1635	1	0	1	1635	2748782	2747148	0	3014	2747148	2748782	75453	459491	Full	-
8	CBCAS	FMv1a.000079	99.878	1635	2	0	1	1635	2836662	2835028	0	3009	2835028	2836662	163333	371611	Full	-
9	CBCAS	FMv1a.000079	99.756	1636	3	1	1	1635	2884510	2882875	0	2998	2882875	2884510	211180	323763	Partial	-
10	CBCAS	FMv1a.000079	99.878	1635	2	0	1	1635	2948534	2946900	0	3009	2946900	2948534	275205	259739	Full	-
11	CBCAS	FMv1a.000079	99.571	1166	5	0	1	1166	3022169	3021004	0	2126	3021004	3022169	349309	186104	Full	-
12	CBCAS	FMv1a.000079	99.633	1635	6	0	1	1635	3068502	3066868	0	2987	3066868	3068502	395173	139771	Full	-
13	CBCAS	FMv1a.000079	99.572	1635	7	0	1	1635	3125078	3123444	0	2981	3123444	3125078	451749	83195	Full	-
	query	target	pident	length	mismatch	gaps	qstart	qend	tstart	tend	evalue	bitscore	start	end	down	up	type	direction
0	CBDAS	FMv1b.000021	100	1635	0	0	1	1635	3396058	3394424	0	3020	3394424	3396058	99109	32924	Full	-
1	CBDAS	FMv1b.000021	92.477	1635	123	0	1	1635	4056480	4058114	0	2338	4056480	4058114	416	38837	Partial	+
2	CBDAS	FMv1b.000021	91.804	1635	134	0	1	1635	4119925	4121559	0	2278	4119925	4121559	416	15983	Partial	+
3	CBDAS	FMv1b.000021	92.477	1635	123	0	1	1635	4150339	4151973	0	2338	4150339	4151973	416	16020	Partial	+
4	CBDAS	FMv1b.000021	92.416	1635	124	0	1	1635	4189926	4191560	0	2333	4189926	4191560	416	14529	Partial	+
5	CBDAS	FMv1b.000021	92.355	1635	125	0	1	1635	4258651	4260285	0	2327	4258651	4260285	416	14060	Partial	+
6	CBDAS	FMv1b.000021	91.327	980	83	2	657	1635	4300132	4301110	0	1338	4300132	4301110	3635	305270	Partial	+
7	THCAS	FMv1b.000021	91.298	1425	118	6	211	1633	4416087	4414667	0	1940	4414667	4416087	118170	190293	Partial	-
8	CBCAS	FMv1b.000103	99.755	1635	4	0	1	1635	7496385	7498019	0	2998	7496385	7498019	343239	156270	Full	+
9	CBCAS	FMv1b.000103	99.755	1635	4	0	1	1635	7564915	7566549	0	2998	7564915	7566549	411769	87740	Full	+
10	CBCAS	FMv1b.000103	99.817	1635	3	0	1	1635	7634634	7636268	0	3003	7634634	7636268	481488	18021	Full	+
11	CBCAS	FMv1b.000103	99.694	1635	5	0	1	1635	7702452	7704086	0	2992	7702452	7704086	45734	785595	Full	+
12	CBCAS	FMv1b.000103	99.939	1635	1	0	1	1635	7768097	7769731	0	3014	7768097	7769731	111379	719950	Full	+
13	CBCAS	FMv1b.000103	99.878	1635	2	0	1	1635	7820632	7822266	0	3009	7820632	7822266	163914	667415	Full	+
14	CBCAS	FMv1b.000103	99.878	1635	2	0	1	1635	7877732	7879366	0	3009	7877732	7879366	221014	610315	Full	+
15	CBCAS	FMv1b.000103	99.939	1635	1	0	1	1635	7935468	7937102	0	3014	7935468	7937102	278750	552579	Full	+
	query	target	pident	length	mismatch	gaps	qstart	qend	tstart	tend	evalue	bitscore	start	end	down	up	type	direction
0	THCAS	FOG.00002732	91.4	1628	135	5	1	1627	3111795	3113418	0	2226	3111795	3113418	126355	150055	Partial	+
1	CBDAS	FOG.00002732	91.376	1635	138	1	1	1635	3263057	3261426	0	2235	3261426	3263057	275986	416	Partial	-
2	CBDAS	FOG.00002732	92.489	1611	121	0	25	1635	3324688	3323078	0	2305	3323078	3324688	36233	434	Partial	-
3	CBDAS	FOG.00002732	89.805	1638	158	3	1	1635	3324706	3323075	0	2091	3323075	3324706	36230	416	Partial	-
4	CBDAS	FOG.00002732	92.232	1635	127	0	1	1635	3366053	3364419	0	2316	3364419	3366053	22232	417	Partial	-
5	CBDAS	FOG.00002732	91.865	1635	133	0	1	1635	3418969	3417335	0	2283	3417335	3418969	25884	416	Partial	-
6	THCAS	FOG.00002732	100	1635	0	0	1	1635	4130990	4129356	0	3020	4129356	4130990	9403	19530	Full	-
7	CBDAS	FOG.00002732	93.772	867	45	4	1	863	4250965	4251826	0	1293	4250965	4251826	8344	18132	Partial	+
8	CBDAS	FOG.00002732	93.935	775	46	1	858	1632	4261267	4262040	0	1170	4261267	4262040	18646	7918	Partial	+
9	CBDAS	FOG.00002732	93.651	1638	94	5	1	1635	4330305	4331935	0	2440	4330305	4331935	14913	15169	Partial	+
10	CBDAS	FOG.00002732	94.814	1639	76	4	1	1635	4474496	4476129	0	2547	4474496	4476129	8567	46895	Partial	+
11	CBCAS	FOG.00002732	92.383	1628	113	4	9	1635	4745033	4746650	0	2309	4745033	4746650	77494	124543	Partial	+
12	CBCAS	FOG.00002929	99.939	1635	1	0	1	1635	3062521	3060887	0	3014	3060887	3062521	75447	200952	Full	-
13	CBCAS	FOG.00002929	99.878	1635	2	0	1	1635	3150400	3148766	0	3009	3148766	3150400	163326	113073	Full	-
14	CBCAS	FOG.00002929	99.878	1635	2	0	1	1635	3211129	3209495	0	3009	3209495	3211129	224055	52344	Full	-
15	CBDAS	FOG.00002929	99.756	1636	3	1	1	1635	3258978	3257343	0	2998	3257343	3258978	271903	4495	Partial	-
16	CBCAS	FOG.00002929	99.878	1635	2	0	1	1635	3323013	3321379	0	3009	3321379	3323013	34534	2109	Full	-
17	CBCAS	FOG.00002929	99.571	1166	5	0	1	1166	3396649	3395484	0	2126	3395484	3396649	4033	22736	Full	-
18	CBCAS	FOG.00002929	99.633	1635	6	0	1	1635	3442982	3441348	0	2987	3441348	3442982	15350	12466	Full	-
19	CBCAS	FOG.00002929	99.572	1635	7	0	1	1635	3499558	3497924	0	2981	3497924	3499558	-1697	13247	Full	-
20	CBDAS	FOG.00002929	91.185	1418	121	4	211	1627	3787738	3789152	0	1923	3787738	3789152	16863	146243	Partial	+
21	CBDAS	FOG.00002929	91.988	1635	130	1	1	1635	3934979	3933346	0	2292	3933346	3934979	162471	416	Partial	-
22	CBDAS	FOG.00002929	92.599	1635	121	0	1	1635	4017512	4015878	0	2350	4015878	4017512	32397	416	Partial	-
23	CBDAS	FOG.00002929	92.416	1635	124	0	1	1635	4048121	4046487	0	2333	4046487	4048121	15681	417	Partial	-
24	CBDAS	FOG.00002929	92.294	1635	126	0	1	1635	4109215	4107581	0	2322	4107581	4109215	34732	416	Partial	-
25	THCAS	FOG.00002929	99.939	1635	1	0	1	1635	4755559	4753925	0	3014	4753925	4755559	86386	115634	Full	-
26	CBDAS	FOG.00002929	93.887	867	44	4	1	863	4880723	4881584	0	1299	4880723	4881584	8343	60664	Partial	+
27	CBDAS	FOG.00002929	94.065	775	45	1	858	1632	4891047	4891820	0	1175	4891047	4891820	18667	50428	Partial	+
28	CBDAS	FOG.00002929	93.773	1638	93	4	1	1635	4961174	4962805	0	2451	4961174	4962805	14906	58443	Partial	+
29	CBDAS	FOG.00002929	94.753	1639	77	4	1	1635	5054421	5056054	0	2542	5054421	5056054	6797	34268	Partial	+
30	CBDAS	FOG.00002929	92.506	1628	111	4	9	1635	5328719	5330336	0	2320	5328719	5330336	8158	2295	Partial	+
31	CBDAS	FOG.00002681	92.232	1635	127	0	1	1635	7785899	7787533	0	2316	7785899	7787533	416	34733	Partial	+
32	CBDAS	FOG.00002681	92.355	1635	125	0	1	1635	7854891	7856525	0	2327	7854891	7856525	417	16056	Partial	+
33	CBDAS	FOG.00002681	92.599	1635	121	0	1	1635	7885912	7887546	0	2350	7885912	7887546	416	2489	Partial	+
34	CBDAS	FOG.00002681	91.988	1635	130	1	1	1635	7968449	7970082	0	2292	7968449	7970082	416	159866	Partial	+
35	CBDAS	FOG.00002681	91.228	1425	119	6	211	1633	8114024	8112604	0	1934	8112604	8114024	144571	15924	Partial	-
	query	target	pident	length	mismatch	gaps	qstart	qend	tstart	tend	evalue	bitscore	start	end	down	up	type	direction
0	CBDAS	GERv1a.chr7	93.428	1628	105	2	9	1635	11658113	11656487	0	2412	11656487	11658113	56849	40802	Partial	-
1	Cannabis_sativa_CBDAS_AB292682	GERv1a.chr7	99.388	1635	10	0	1	1635	12065163	12063529	0	2964	12063529	12065163	138443	165597	Partial	-
2	CBDAS	GERv1a.chr7	92.538	1635	122	0	1	1635	12654466	12656100	0	2344	12654466	12656100	416	29370	Partial	+
3	CBDAS	GERv1a.chr7	91.988	1635	131	0	1	1635	12708482	12710116	0	2294	12708482	12710116	416	15961	Partial	+
4	CBDAS	GERv1a.chr7	92.538	1635	122	0	1	1635	12738865	12740499	0	2344	12738865	12740499	416	18088	Partial	+
5	CBDAS	GERv1a.chr7	92.355	1635	125	0	1	1635	12771428	12773062	0	2327	12771428	12773062	416	14534	Partial	+
6	CBDAS	GERv1a.chr7	92.294	1635	126	0	1	1635	12830466	12832100	0	2322	12830466	12832100	417	13887	Partial	+
7	CBDAS	GERv1a.chr7	91.327	980	83	2	657	1635	12863377	12864355	0	1338	12863377	12864355	3636	117416	Partial	+
8	CBDAS	GERv1a.chr7	91.439	1425	116	6	211	1633	12997358	12995938	0	1951	12995938	12997358	12091	16446	Partial	-
9	CBCAS	GERv1a.chr7	99.817	1635	3	0	1	1635	31999777	31998143	0	3003	31998143	31999777	81861	262494	Full	-
10	CBCAS	GERv1a.chr7	99.817	1635	3	0	1	1635	32061614	32059980	0	3003	32059980	32061614	143698	200657	Full	-
11	CBCAS	GERv1a.chr7	99.756	1638	1	1	1	1635	32095852	32094215	0	3000	32094215	32095852	177933	166419	Partial	-
12	CBCAS	GERv1a.chr7	99.878	1635	2	0	1	1635	32166768	32165134	0	3009	32165134	32166768	248852	95503	Full	-
13	CBCAS	GERv1a.chr7	99.878	1635	2	0	1	1635	32241235	32239601	0	3009	32239601	32241235	323319	21036	Full	-
14	CBCAS	GERv1a.chr7	99.878	1635	2	0	1	1635	32319299	32317665	0	3009	32317665	32319299	51752	68614	Full	-
15	CBCAS	GERv1a.chr7	99.694	1635	5	0	1	1635	32398544	32396910	0	2992	32396910	32398544	2822	119405	Full	-
16	CBCAS	GERv1a.chr7	99.878	1635	2	0	1	1635	32450204	32448570	0	3009	32448570	32450204	54482	67745	Full	-
17	CBCAS	GERv1a.chr7	99.817	1635	3	0	1	1635	32473960	32472326	0	3003	32472326	32473960	78238	43989	Full	-
18	CBDAS	GERv1a.chr7	99.755	1635	2	2	1	1635	32528017	32526385	0	2996	32526385	32528017	-638	4089	Partial	-
	query	target	pident	length	mismatch	gaps	qstart	qend	tstart	tend	evalue	bitscore	start	end	down	up	type	direction
0	CBCAS	GERv1b.chr7	99.755	1635	4	0	1	1635	33772153	33773787	0	2998	33772153	33773787	59161	207221	Full	+
1	CBCAS	GERv1b.chr7	99.694	1635	5	0	1	1635	33828176	33829810	0	2992	33828176	33829810	115184	151198	Full	+
2	CBCAS	GERv1b.chr7	99.878	1635	2	0	1	1635	33886425	33888059	0	3009	33886425	33888059	173433	92949	Full	+
3	CBCAS	GERv1b.chr7	99.633	1635	6	0	1	1635	33976187	33977821	0	2987	33976187	33977821	263195	3187	Full	+
4	CBDAS	GERv1b.chr7	99.572	1636	6	1	1	1635	34039878	34041513	0	2981	34039878	34041513	1971	140304	Partial	+
5	CBCAS	GERv1b.chr7	99.817	1635	3	0	1	1635	34076448	34078082	0	3003	34076448	34078082	38541	103735	Full	+
6	CBCAS	GERv1b.chr7	99.817	1635	3	0	1	1635	34151300	34152934	0	3003	34151300	34152934	113393	28883	Full	+
7	CBCAS	GERv1b.chr7	99.939	1635	1	0	1	1635	34202414	34204048	0	3014	34202414	34204048	18511	155418	Full	+
8	CBDAS	GERv1b.chr7	91.402	1419	116	6	211	1627	49951043	49952457	0	1940	49951043	49952457	3060	136123	Partial	+
9	CBDAS	GERv1b.chr7	91.327	980	83	2	657	1635	50084943	50083965	0	1338	50083965	50084943	135982	3637	Partial	-
10	CBDAS	GERv1b.chr7	92.565	1614	120	0	22	1635	50117837	50116224	0	2316	50116224	50117837	13886	437	Partial	-
11	CBDAS	GERv1b.chr7	89.988	1638	161	2	1	1635	50117858	50116221	0	2113	50116221	50117858	13883	416	Partial	-
12	CBDAS	GERv1b.chr7	92.355	1635	125	0	1	1635	50176889	50175255	0	2327	50175255	50176889	14533	416	Partial	-
13	CBDAS	GERv1b.chr7	92.477	1635	123	0	1	1635	50209485	50207851	0	2338	50207851	50209485	18122	416	Partial	-
14	CBDAS	GERv1b.chr7	91.988	1635	131	0	1	1635	50239916	50238282	0	2294	50238282	50239916	16010	416	Partial	-
15	CBDAS	GERv1b.chr7	92.482	1636	121	2	1	1635	50293924	50292290	0	2338	50292290	50293924	29370	416	Partial	-
16	CBDAS	GERv1b.chr7	99.388	1635	10	0	1	1635	50881737	50883371	0	2964	50881737	50883371	-4727	27626	Partial	+
17	CBDAS	GERv1b.chr7	93.305	1628	107	2	9	1635	51281777	51283403	0	2401	51281777	51283403	66258	57027	Partial	+
	query	target	pident	length	mismatch	gaps	qstart	qend	tstart	tend	evalue	bitscore	start	end	down	up	type	direction
0	CBDAS	GMO.00002620	92.383	1628	113	4	9	1635	3781066	3779449	0	2309	3779449	3781066	6942	76782	Partial	-
1	CBDAS	GMO.00002620	94.814	1639	76	4	1	1635	4051607	4049974	0	2547	4049974	4051607	46899	8567	Partial	-
2	CBDAS	GMO.00002620	93.651	1638	94	5	1	1635	4195798	4194168	0	2440	4194168	4195798	48680	14913	Partial	-
3	CBDAS	GMO.00002620	87.581	773	91	5	865	1635	4264832	4264063	0	891	4264063	4264832	49342	18650	Partial	-
4	CBDAS	GMO.00002620	93.83	778	47	1	858	1635	4264836	4264060	0	1170	4264060	4264836	49339	18646	Partial	-
5	CBDAS	GMO.00002620	93.772	867	45	4	1	863	4275138	4274277	0	1293	4274277	4275138	59556	8344	Partial	-
6	THCAS	GMO.00002620	100	1635	0	0	1	1635	4395113	4396747	0	3020	4395113	4396747	110443	40014	Full	+
7	CBDAS	GMO.00002620	91.865	1635	133	0	1	1635	5107131	5108765	0	2283	5107131	5108765	416	25884	Partial	+
8	CBDAS	GMO.00002620	92.232	1635	127	0	1	1635	5160046	5161680	0	2316	5160046	5161680	417	22232	Partial	+
9	CBDAS	GMO.00002620	89.805	1638	158	3	1	1635	5201393	5203024	0	2091	5201393	5203024	416	36230	Partial	+
10	CBDAS	GMO.00002620	92.441	1614	122	0	22	1635	5201408	5203021	0	2305	5201408	5203021	431	36233	Partial	+
11	CBDAS	GMO.00002620	91.376	1635	138	1	1	1635	5263041	5264672	0	2235	5263041	5264672	416	79240	Partial	+
12	THCAS	GMO.00002620	91.31	1634	137	5	1	1633	5414302	5412673	0	2226	5412673	5414302	67428	164998	Partial	-
13	CBDAS	GMO.00002336	92.506	1628	111	4	9	1635	12963296	12961679	0	2320	12961679	12963296	141888	8158	Partial	-
14	CBDAS	GMO.00002336	94.753	1639	77	4	1	1635	13212184	13210551	0	2542	13210551	13212184	46744	6797	Partial	-
15	CBDAS	GMO.00002336	93.773	1638	93	4	1	1635	13305262	13303631	0	2451	13303631	13305262	58272	14906	Partial	-
16	CBDAS	GMO.00002336	87.71	773	90	5	865	1635	13365904	13365135	0	896	13365135	13365904	40947	18670	Partial	-
17	CBDAS	GMO.00002336	93.959	778	46	1	858	1635	13365908	13365132	0	1175	13365132	13365908	40944	18666	Partial	-
18	CBDAS	GMO.00002336	93.887	867	44	4	1	863	13376231	13375370	0	1299	13375370	13376231	51182	8343	Partial	-
19	THCAS	GMO.00002336	99.939	1635	1	0	1	1635	13501375	13503009	0	3014	13501375	13503009	77459	61340	Full	+
20	CBDAS	GMO.00002336	92.294	1635	126	0	1	1635	14147440	14149074	0	2322	14147440	14149074	416	34732	Partial	+
21	CBDAS	GMO.00002337	92.355	1635	125	0	1	1635	20620	22254	0	2327	20620	22254	417	-527	Partial	+
22	CBDAS	GMO.00002337	92.599	1635	121	0	1	1635	51622	53256	0	2350	51622	53256	416	-3689	Partial	+
23	CBDAS	GMO.00002337	91.988	1635	130	1	1	1635	134157	135790	0	2292	134157	135790	416	603	Partial	+
24	CBDAS	GMO.00002337	91.228	1425	119	6	211	1633	279729	278309	0	1934	278309	279729	139753	15922	Partial	-
25	CBDAS	GMO.00000993	92.416	1635	124	0	1	1635	25932	27566	0	2333	25932	27566	417	10743	Partial	+
26	CBDAS	GMO.00000993	92.538	1635	122	0	1	1635	56534	58168	0	2344	56534	58168	416	27484	Partial	+
27	CBDAS	GMO.00000993	91.988	1635	130	1	1	1635	138972	140605	0	2292	138972	140605	416	155046	Partial	+
28	CBDAS	GMO.00000993	91.081	1424	123	4	211	1633	286213	284793	0	1923	284793	286213	146237	9438	Partial	-
29	CBDAS	GMO.00000993	92.232	1635	127	0	1	1635	450861	452495	0	2316	450861	452495	416	10045	Partial	+
30	CBCAS	GMO.00001229	99.939	1635	1	0	1	1635	3337615	3335981	0	3014	3335981	3337615	75449	92422	Full	-
31	CBCAS	GMO.00001229	99.878	1635	2	0	1	1635	3425495	3423861	0	3009	3423861	3425495	163329	4542	Full	-
32	CBCAS	GMO.00001229	99.878	1635	2	0	1	1635	3486223	3484589	0	3009	3484589	3486223	48816	285094	Full	-
33	CBCAS	GMO.00001229	99.756	1636	3	1	1	1635	3534072	3532437	0	2998	3532437	3534072	96664	237245	Partial	-
34	CBCAS	GMO.00001229	99.878	1635	2	0	1	1635	3598107	3596473	0	3009	3596473	3598107	160700	173210	Full	-
35	CBCAS	GMO.00001229	99.571	1166	5	0	1	1166	3671742	3670577	0	2126	3670577	3671742	234804	99575	Full	-
36	CBCAS	GMO.00001229	99.633	1635	6	0	1	1635	3718075	3716441	0	2987	3716441	3718075	280668	53242	Full	-
37	CBCAS	GMO.00001229	99.572	1635	7	0	1	1635	3774653	3773019	0	2981	3773019	3774653	512	83195	Full	-
	query	target	pident	length	mismatch	gaps	qstart	qend	tstart	tend	evalue	bitscore	start	end	down	up	type	direction
0	CBCAS	GRMa.chr7	99.572	1635	7	0	1	1635	34880427	34882061	0	2981	34880427	34882061	83193	451748	Full	+
1	CBCAS	GRMa.chr7	99.633	1635	6	0	1	1635	34937003	34938637	0	2987	34937003	34938637	139769	395172	Full	+
2	CBCAS	GRMa.chr7	99.827	1157	2	0	1	1157	34983336	34984492	0	2126	34983336	34984492	186102	349317	Full	+
3	CBCAS	GRMa.chr7	99.878	1635	2	0	1	1635	35056971	35058605	0	3009	35056971	35058605	259737	275204	Full	+
4	CBCAS	GRMa.chr7	99.756	1636	3	1	1	1635	35120994	35122629	0	2998	35120994	35122629	323760	211180	Partial	+
5	CBCAS	GRMa.chr7	99.878	1635	2	0	1	1635	35168842	35170476	0	3009	35168842	35170476	371608	163333	Full	+
6	CBCAS	GRMa.chr7	99.939	1635	1	0	1	1635	35256722	35258356	0	3014	35256722	35258356	459488	75453	Full	+
7	THCAS	GRMa.chr7	91.402	1419	116	6	211	1627	51322573	51323987	0	1940	51322573	51323987	166781	128628	Partial	+
8	CBDAS	GRMa.chr7	91.327	980	83	2	657	1635	51448977	51447999	0	1338	51447999	51448977	292207	3638	Partial	-
9	CBDAS	GRMa.chr7	92.416	1635	124	0	1	1635	51480975	51479341	0	2333	51479341	51480975	14061	416	Partial	-
10	CBDAS	GRMa.chr7	92.416	1635	124	0	1	1635	51540224	51538590	0	2333	51538590	51540224	14537	416	Partial	-
11	CBDAS	GRMa.chr7	92.538	1635	122	0	1	1635	51574567	51572933	0	2344	51572933	51574567	24288	416	Partial	-
12	CBDAS	GRMa.chr7	91.927	1635	132	0	1	1635	51604962	51603328	0	2289	51603328	51604962	15962	416	Partial	-
13	CBDAS	GRMa.chr7	100	1635	0	0	1	1635	52262121	52263755	0	3020	52262121	52263755	32930	10280	Full	+
	query	target	pident	length	mismatch	gaps	qstart	qend	tstart	tend	evalue	bitscore	start	end	down	up	type	direction
0	CBDAS	GRMb.chr7	93.428	1628	105	2	9	1635	10036008	10034382	0	2412	10034382	10036008	67152	14415	Partial	-
1	Cannabis_sativa_CBDAS_AB292682	GRMb.chr7	99.388	1635	10	0	1	1635	10434906	10433272	0	2964	10433272	10434906	80614	226710	Partial	-
2	CBDAS	GRMb.chr7	92.538	1635	122	0	1	1635	11022760	11024394	0	2344	11022760	11024394	416	29370	Partial	+
3	CBDAS	GRMb.chr7	91.988	1635	131	0	1	1635	11076772	11078406	0	2294	11076772	11078406	416	15962	Partial	+
4	CBDAS	GRMb.chr7	92.477	1635	123	0	1	1635	11107153	11108787	0	2338	11107153	11108787	416	18124	Partial	+
5	CBDAS	GRMb.chr7	92.355	1635	125	0	1	1635	11139763	11141397	0	2327	11139763	11141397	416	14533	Partial	+
6	CBDAS	GRMb.chr7	92.355	1635	125	0	1	1635	11198804	11200438	0	2327	11198804	11200438	417	16565	Partial	+
7	CBDAS	GRMb.chr7	91.327	980	83	2	657	1635	11234392	11235370	0	1338	11234392	11235370	3636	303484	Partial	+
8	THCAS	GRMb.chr7	91.439	1425	116	6	211	1633	11362901	11361481	0	1951	11361481	11362901	130725	175953	Partial	-
9	CBCAS	GRMb.chr7	99.817	1635	3	0	1	1635	28654963	28653329	0	3003	28653329	28654963	81856	262494	Full	-
10	CBCAS	GRMb.chr7	99.817	1635	3	0	1	1635	28716800	28715166	0	3003	28715166	28716800	143693	200657	Full	-
11	CBCAS	GRMb.chr7	99.756	1638	1	1	1	1635	28751038	28749401	0	3000	28749401	28751038	177928	166419	Partial	-
12	CBCAS	GRMb.chr7	99.878	1635	2	0	1	1635	28821954	28820320	0	3009	28820320	28821954	248847	95503	Full	-
13	CBCAS	GRMb.chr7	99.878	1635	2	0	1	1635	28896421	28894787	0	3009	28894787	28896421	323314	21036	Full	-
14	CBCAS	GRMb.chr7	99.878	1635	2	0	1	1635	28974485	28972851	0	3009	28972851	28974485	51752	68614	Full	-
15	CBCAS	GRMb.chr7	99.694	1635	5	0	1	1635	29053730	29052096	0	2992	29052096	29053730	2822	207748	Full	-
16	CBCAS	GRMb.chr7	99.878	1635	2	0	1	1635	29105390	29103756	0	3009	29103756	29105390	54482	156088	Full	-
17	CBCAS	GRMb.chr7	99.817	1635	3	0	1	1635	29129146	29127512	0	3003	29127512	29129146	78238	132332	Full	-
18	CBCAS	GRMb.chr7	99.755	1635	2	2	1	1635	29183203	29181571	0	2996	29181571	29183203	132297	78275	Partial	-
	query	target	pident	length	mismatch	gaps	qstart	qend	tstart	tend	evalue	bitscore	start	end	down	up	type	direction
0	CBDAS	GSC.00000273	92.506	1628	111	4	9	1635	5827835	5826218	0	2320	5826218	5827835	327844	8158	Partial	-
1	CBDAS	GSC.00000273	94.753	1639	77	4	1	1635	6076724	6075091	0	2542	6075091	6076724	46745	6797	Partial	-
2	CBDAS	GSC.00000273	93.773	1638	93	4	1	1635	6169802	6168171	0	2451	6168171	6169802	5110	5119	Partial	-
3	CBDAS	GSC.00000273	87.71	773	90	5	865	1635	6230444	6229675	0	896	6229675	6230444	37180	18670	Partial	-
4	CBDAS	GSC.00000273	93.959	778	46	1	858	1635	6230448	6229672	0	1175	6229672	6230448	37177	18666	Partial	-
5	CBDAS	GSC.00000273	93.887	867	44	4	1	863	6240771	6239910	0	1299	6239910	6240771	47415	8343	Partial	-
6	THCAS	GSC.00000273	99.939	1635	1	0	1	1635	6365915	6367549	0	3014	6365915	6367549	115614	5510	Full	+
7	CBDAS	GSC.00000273	92.294	1635	126	0	1	1635	7009560	7011194	0	2322	7009560	7011194	416	2343	Partial	+
8	CBDAS	GSC.00000273	92.416	1635	124	0	1	1635	7070663	7072297	0	2333	7070663	7072297	417	15681	Partial	+
9	CBDAS	GSC.00000273	92.538	1635	122	0	1	1635	7101269	7102903	0	2344	7101269	7102903	416	39598	Partial	+
10	CBDAS	GSC.00000273	91.988	1635	130	1	1	1635	7183707	7185340	0	2292	7183707	7185340	416	1004	Partial	+
11	CBDAS	GSC.00000273	91.081	1424	123	4	211	1633	7330948	7329528	0	1923	7329528	7330948	11834	15920	Partial	-
12	CBDAS	GSC.00000273	92.232	1635	127	0	1	1635	7495600	7497234	0	2316	7495600	7497234	416	30149	Partial	+
13	CBDAS	GSC.00000273	92.355	1635	125	0	1	1635	7564616	7566250	0	2327	7564616	7566250	417	16055	Partial	+
14	CBDAS	GSC.00000273	92.599	1635	121	0	1	1635	7595621	7597255	0	2350	7595621	7597255	416	32396	Partial	+
15	CBDAS	GSC.00000273	91.988	1635	130	1	1	1635	7678155	7679788	0	2292	7678155	7679788	416	159861	Partial	+
16	CBDAS	GSC.00000273	91.228	1425	119	6	211	1633	7823727	7822307	0	1934	7822307	7823727	144568	15922	Partial	-
17	CBCAS	GSC.00000093	99.572	1635	7	0	1	1635	18305785	18307419	0	2981	18305785	18307419	83197	512487	Full	+
18	CBCAS	GSC.00000093	99.633	1635	6	0	1	1635	18362363	18363997	0	2987	18362363	18363997	139775	455909	Full	+
19	CBCAS	GSC.00000093	99.827	1157	2	0	1	1157	18408696	18409852	0	2126	18408696	18409852	186108	410054	Full	+
20	CBCAS	GSC.00000093	99.878	1635	2	0	1	1635	18482331	18483965	0	3009	18482331	18483965	259743	335941	Full	+
21	CBCAS	GSC.00000093	99.756	1636	3	1	1	1635	18546366	18548001	0	2998	18546366	18548001	323778	271905	Partial	+
22	CBCAS	GSC.00000093	99.878	1635	2	0	1	1635	18594215	18595849	0	3009	18594215	18595849	371627	224057	Full	+
23	CBCAS	GSC.00000093	99.878	1635	2	0	1	1635	18654943	18656577	0	3009	18654943	18656577	432355	163329	Full	+
24	CBCAS	GSC.00000093	99.939	1635	1	0	1	1635	18742823	18744457	0	3014	18742823	18744457	520235	75449	Full	+
	query	target	pident	length	mismatch	gaps	qstart	qend	tstart	tend	evalue	bitscore	start	end	down	up	type	direction
0	THCAS	H3S1a.chr7	91.402	1419	116	6	211	1627	53274239	53275653	0	1940	53274239	53275653	187476	118176	Partial	+
1	CBDAS	H3S1a.chr7	91.327	980	83	2	657	1635	53390194	53389216	0	1338	53389216	53390194	302453	3635	Partial	-
2	CBDAS	H3S1a.chr7	92.355	1635	125	0	1	1635	53431690	53430056	0	2327	53430056	53431690	14060	416	Partial	-
3	CBDAS	H3S1a.chr7	92.416	1635	124	0	1	1635	53500414	53498780	0	2333	53498780	53500414	14529	416	Partial	-
4	CBDAS	H3S1a.chr7	92.477	1635	123	0	1	1635	53540008	53538374	0	2338	53538374	53540008	16020	416	Partial	-
5	CBDAS	H3S1a.chr7	91.804	1635	134	0	1	1635	53570423	53568789	0	2278	53568789	53570423	15983	416	Partial	-
6	CBDAS	H3S1a.chr7	92.477	1635	123	0	1	1635	53633866	53632232	0	2338	53632232	53633866	38837	416	Partial	-
	query	target	pident	length	mismatch	gaps	qstart	qend	tstart	tend	evalue	bitscore	start	end	down	up	type	direction
0	CBDAS	H3S1b.chr7	92.232	1635	127	0	1	1635	35155228	35156862	0	2316	35155228	35156862	416	34732	Partial	+
1	CBDAS	H3S1b.chr7	92.355	1635	125	0	1	1635	35224214	35225848	0	2327	35224214	35225848	417	16056	Partial	+
2	CBDAS	H3S1b.chr7	92.599	1635	121	0	1	1635	35255229	35256863	0	2350	35255229	35256863	416	32396	Partial	+
3	CBDAS	H3S1b.chr7	91.988	1635	130	1	1	1635	35337765	35339398	0	2292	35337765	35339398	416	159866	Partial	+
4	CBDAS	H3S1b.chr7	91.228	1425	119	6	211	1633	35483340	35481920	0	1934	35481920	35483340	144571	15924	Partial	-
5	CBCAS	H3S1b.chr7	99.939	1635	1	0	1	1635	52568322	52566688	0	3014	52566688	52568322	28272	22241	Full	-
6	CBCAS	H3S1b.chr7	99.878	1635	2	0	1	1635	52656202	52654568	0	3009	52654568	52656202	62836	229811	Full	-
7	CBCAS	H3S1b.chr7	99.878	1635	2	0	1	1635	52716930	52715296	0	3009	52715296	52716930	123564	169083	Full	-
8	CBCAS	H3S1b.chr7	99.756	1636	3	1	1	1635	52764779	52763144	0	2998	52763144	52764779	171412	121234	Partial	-
9	CBCAS	H3S1b.chr7	99.878	1635	2	0	1	1635	52828814	52827180	0	3009	52827180	52828814	235448	57199	Full	-
10	CBCAS	H3S1b.chr7	99.571	1166	5	0	1	1166	52902449	52901284	0	2126	52901284	52902449	13939	136353	Full	-
11	CBCAS	H3S1b.chr7	99.633	1635	6	0	1	1635	52948782	52947148	0	2987	52947148	52948782	59803	90020	Full	-
12	CBCAS	H3S1b.chr7	99.572	1635	7	0	1	1635	53005358	53003724	0	2981	53003724	53005358	116379	33444	Full	-
13	CBDAS	H3S1b.chr7	91.185	1418	121	4	211	1627	53293510	53294924	0	1923	53293510	53294924	15922	79899	Partial	+
14	CBDAS	H3S1b.chr7	91.988	1635	130	1	1	1635	53440751	53439118	0	2292	53439118	53440751	63029	416	Partial	-
15	CBDAS	H3S1b.chr7	92.599	1635	121	0	1	1635	53523282	53521648	0	2350	53521648	53523282	32397	416	Partial	-
16	CBDAS	H3S1b.chr7	92.416	1635	124	0	1	1635	53553891	53552257	0	2333	53552257	53553891	15681	417	Partial	-
17	CBDAS	H3S1b.chr7	92.294	1635	126	0	1	1635	53614990	53613356	0	2322	53613356	53614990	34732	416	Partial	-
18	THCAS	H3S1b.chr7	99.939	1635	1	0	1	1635	54261334	54259700	0	3014	54259700	54261334	30663	115634	Full	-
19	CBDAS	H3S1b.chr7	93.887	867	44	4	1	863	54386497	54387358	0	1299	54386497	54387358	8343	60664	Partial	+
20	CBDAS	H3S1b.chr7	94.065	775	45	1	858	1632	54396821	54397594	0	1175	54396821	54397594	18667	50428	Partial	+
21	CBDAS	H3S1b.chr7	93.773	1638	93	4	1	1635	54466948	54468579	0	2451	54466948	54468579	14906	23095	Partial	+
22	CBDAS	H3S1b.chr7	94.753	1639	77	4	1	1635	54560196	54561829	0	2542	54560196	54561829	6797	46745	Partial	+
23	CBDAS	H3S1b.chr7	92.506	1628	111	4	9	1635	54834493	54836110	0	2320	54834493	54836110	8158	176493	Partial	+
	query	target	pident	length	mismatch	gaps	qstart	qend	tstart	tend	evalue	bitscore	start	end	down	up	type	direction
0	CBDAS	H3S7a.chr7	91.402	1419	116	6	211	1627	55175014	55176428	0	1940	55175014	55176428	53858	118175	Partial	+
1	CBDAS	H3S7a.chr7	91.327	980	83	2	657	1635	55290968	55289990	0	1338	55289990	55290968	168834	3635	Partial	-
2	CBDAS	H3S7a.chr7	92.355	1635	125	0	1	1635	55332463	55330829	0	2327	55330829	55332463	14060	416	Partial	-
3	CBDAS	H3S7a.chr7	92.416	1635	124	0	1	1635	55401184	55399550	0	2333	55399550	55401184	14529	416	Partial	-
4	CBDAS	H3S7a.chr7	92.477	1635	123	0	1	1635	55440778	55439144	0	2338	55439144	55440778	16020	416	Partial	-
5	CBDAS	H3S7a.chr7	91.804	1635	134	0	1	1635	55471193	55469559	0	2278	55469559	55471193	15983	416	Partial	-
6	CBDAS	H3S7a.chr7	92.477	1635	123	0	1	1635	55534636	55533002	0	2338	55533002	55534636	-3863	416	Partial	-
	query	target	pident	length	mismatch	gaps	qstart	qend	tstart	tend	evalue	bitscore	start	end	down	up	type	direction
0	CBDAS	H3S7b.chr7	92.506	1628	111	4	9	1635	11511918	11510301	0	2320	11510301	11511918	174152	8159	Partial	-
1	CBDAS	H3S7b.chr7	94.814	1639	76	4	1	1635	11776836	11775203	0	2547	11775203	11776836	46889	6795	Partial	-
2	CBDAS	H3S7b.chr7	93.712	1638	94	4	1	1635	11870043	11868412	0	2446	11868412	11870043	58391	14929	Partial	-
3	CBDAS	H3S7b.chr7	87.71	773	90	5	865	1635	11949884	11949115	0	896	11949115	11949884	60124	18672	Partial	-
4	CBDAS	H3S7b.chr7	93.959	778	46	1	858	1635	11949888	11949112	0	1175	11949112	11949888	60121	18668	Partial	-
5	CBDAS	H3S7b.chr7	93.887	867	44	4	1	863	11960212	11959351	0	1299	11959351	11960212	70360	8344	Partial	-
6	THCAS	H3S7b.chr7	99.939	1635	1	0	1	1635	12081985	12083619	0	3014	12081985	12083619	83722	86508	Full	+
7	CBDAS	H3S7b.chr7	91.865	1635	133	0	1	1635	12773760	12775394	0	2283	12773760	12775394	416	25886	Partial	+
8	CBDAS	H3S7b.chr7	92.171	1635	128	0	1	1635	12826297	12827931	0	2311	12826297	12827931	417	22233	Partial	+
9	CBDAS	H3S7b.chr7	89.744	1638	159	3	1	1635	12862681	12864312	0	2085	12862681	12864312	415	26027	Partial	+
10	CBDAS	H3S7b.chr7	92.379	1614	123	0	22	1635	12862696	12864309	0	2300	12862696	12864309	430	26030	Partial	+
11	CBDAS	H3S7b.chr7	91.376	1635	138	1	1	1635	12914126	12915757	0	2235	12914126	12915757	416	304726	Partial	+
12	THCAS	H3S7b.chr7	91.31	1634	137	5	1	1633	13065461	13063832	0	2226	13063832	13065461	150122	155022	Partial	-
	query	target	pident	length	mismatch	gaps	qstart	qend	tstart	tend	evalue	bitscore	start	end	down	up	type	direction
0	CBDAS	HO40.000018F	92.445	1628	112	4	9	1635	7215681	7214064	0	2314	7214064	7215681	135243	8159	Partial	-
1	CBDAS	HO40.000018F	94.814	1639	76	4	1	1635	7486054	7484421	0	2547	7484421	7486054	46896	8654	Partial	-
2	CBDAS	HO40.000018F	93.712	1638	94	4	1	1635	7630333	7628702	0	2446	7628702	7630333	100598	14913	Partial	-
3	CBDAS	HO40.000018F	87.581	773	91	5	865	1635	7700452	7699683	0	891	7699683	7700452	10960	32803	Partial	-
4	CBDAS	HO40.000018F	93.83	778	47	1	858	1635	7700456	7699680	0	1170	7699680	7700456	10957	32799	Partial	-
5	CBDAS	HO40.000018F	93.772	867	45	4	1	863	7717977	7717116	0	1293	7717116	7717977	28393	15278	Partial	-
6	THCAS	HO40.000018F	100	1635	0	0	1	1635	7844496	7846130	0	3020	7844496	7846130	85354	86508	Full	+
7	CBDAS	HO40.000018F	91.865	1635	133	0	1	1635	8539018	8540652	0	2283	8539018	8540652	416	25885	Partial	+
8	CBDAS	HO40.000018F	92.232	1635	127	0	1	1635	8591930	8593564	0	2316	8591930	8593564	417	22234	Partial	+
9	CBDAS	HO40.000018F	89.805	1638	158	3	1	1635	8633277	8634908	0	2091	8633277	8634908	416	26028	Partial	+
10	CBDAS	HO40.000018F	92.441	1614	122	0	22	1635	8633292	8634905	0	2305	8633292	8634905	431	26031	Partial	+
11	CBDAS	HO40.000018F	91.376	1635	138	1	1	1635	8684725	8686356	0	2235	8684725	8686356	416	213128	Partial	+
12	THCAS	HO40.000018F	91.31	1634	137	5	1	1633	8836031	8834402	0	2226	8834402	8836031	150093	63453	Partial	-
	query	target	pident	length	mismatch	gaps	qstart	qend	tstart	tend	evalue	bitscore	start	end	down	up	type	direction
0	THCAS	I3.000077F	100	1635	0	0	1	1635	424613	422979	0	3020	422979	424613	10257	110443	Full	-
1	CBDAS	I3.000077F	93.772	867	45	4	1	863	544588	545449	0	1293	544588	545449	8344	17428	Partial	+
2	CBDAS	I3.000077F	93.935	775	46	1	858	1632	554890	555663	0	1170	554890	555663	18646	7214	Partial	+
3	CBDAS	I3.000077F	93.712	1638	94	4	1	1635	625015	626646	0	2446	625015	626646	14913	100602	Partial	+
4	CBDAS	I3.000077F	94.814	1639	76	4	1	1635	769212	770845	0	2547	769212	770845	8567	46901	Partial	+
5	CBDAS	I3.000077F	92.506	1628	111	4	9	1635	1042755	1044372	0	2320	1042755	1044372	8194	53128	Partial	+
6	CBDAS	I3.000005F	91.865	1635	133	0	1	1635	6685843	6687477	0	2283	6685843	6687477	416	25884	Partial	+
7	CBDAS	I3.000005F	92.232	1635	127	0	1	1635	6738755	6740389	0	2316	6738755	6740389	417	22232	Partial	+
8	CBDAS	I3.000005F	89.805	1638	158	3	1	1635	6780101	6781732	0	2091	6780101	6781732	416	26027	Partial	+
9	CBDAS	I3.000005F	92.441	1614	122	0	22	1635	6780116	6781729	0	2305	6780116	6781729	431	26030	Partial	+
10	CBDAS	I3.000005F	91.376	1635	138	1	1	1635	6831547	6833178	0	2235	6831547	6833178	416	314620	Partial	+
11	THCAS	I3.000005F	91.31	1634	137	5	1	1633	6982811	6981182	0	2226	6981182	6982811	150051	164987	Partial	-
	query	target	pident	length	mismatch	gaps	qstart	qend	tstart	tend	evalue	bitscore	start	end	down	up	type	direction
0	CBDAS	I52.000012F	92.506	1628	111	4	9	1635	7476077	7474460	0	2320	7474460	7476077	167403	8194	Partial	-
1	CBDAS	I52.000012F	94.814	1639	76	4	1	1635	7749618	7747985	0	2547	7747985	7749618	46898	8567	Partial	-
2	CBDAS	I52.000012F	93.712	1638	94	4	1	1635	7893811	7892180	0	2446	7892180	7893811	100598	14913	Partial	-
3	CBDAS	I52.000012F	87.581	773	91	5	865	1635	7963931	7963162	0	891	7963162	7963931	50428	18650	Partial	-
4	CBDAS	I52.000012F	93.83	778	47	1	858	1635	7963935	7963159	0	1170	7963159	7963935	50425	18646	Partial	-
5	CBDAS	I52.000012F	93.772	867	45	4	1	863	7974237	7973376	0	1293	7973376	7974237	60642	8344	Partial	-
6	THCAS	I52.000012F	100	1635	0	0	1	1635	8094212	8095846	0	3020	8094212	8095846	110443	86508	Full	+
7	CBDAS	I52.000012F	91.865	1635	133	0	1	1635	8795884	8797518	0	2283	8795884	8797518	416	25884	Partial	+
8	CBDAS	I52.000012F	92.232	1635	127	0	1	1635	8848798	8850432	0	2316	8848798	8850432	417	22232	Partial	+
9	CBDAS	I52.000012F	89.805	1638	158	3	1	1635	8890144	8891775	0	2091	8890144	8891775	416	26027	Partial	+
10	CBDAS	I52.000012F	92.441	1614	122	0	22	1635	8890159	8891772	0	2305	8890159	8891772	431	26030	Partial	+
11	CBDAS	I52.000012F	91.376	1635	138	1	1	1635	8941589	8943220	0	2235	8941589	8943220	416	248321	Partial	+
12	THCAS	I52.000012F	91.31	1634	137	5	1	1633	9092852	9091223	0	2226	9091223	9092852	150050	98689	Partial	-
	query	target	pident	length	mismatch	gaps	qstart	qend	tstart	tend	evalue	bitscore	start	end	down	up	type	direction
0	CBDAS	I53.000015F	92.506	1628	111	4	9	1635	581582	579965	0	2320	579965	581582	57603	8194	Partial	-
1	CBDAS	I53.000015F	94.814	1639	76	4	1	1635	855128	853495	0	2547	853495	855128	46903	8567	Partial	-
2	CBDAS	I53.000015F	93.712	1638	94	4	1	1635	999323	997692	0	2446	997692	999323	100600	14913	Partial	-
3	CBDAS	I53.000015F	87.581	773	91	5	865	1635	1069443	1068674	0	891	1068674	1069443	50428	18650	Partial	-
4	CBDAS	I53.000015F	93.83	778	47	1	858	1635	1069447	1068671	0	1170	1068671	1069447	50425	18646	Partial	-
5	CBDAS	I53.000015F	93.772	867	45	4	1	863	1079749	1078888	0	1293	1078888	1079749	60642	8344	Partial	-
6	THCAS	I53.000015F	100	1635	0	0	1	1635	1199724	1201358	0	3020	1199724	1201358	63588	86508	Full	+
7	CBDAS	I53.000015F	91.865	1635	133	0	1	1635	1901390	1903024	0	2283	1901390	1903024	416	25884	Partial	+
8	CBDAS	I53.000015F	92.232	1635	127	0	1	1635	1954304	1955938	0	2316	1954304	1955938	417	22232	Partial	+
9	CBDAS	I53.000015F	89.805	1638	158	3	1	1635	1995650	1997281	0	2091	1995650	1997281	416	26027	Partial	+
10	CBDAS	I53.000015F	92.441	1614	122	0	22	1635	1995665	1997278	0	2305	1995665	1997278	431	26030	Partial	+
11	CBDAS	I53.000015F	91.376	1635	138	1	1	1635	2047096	2048727	0	2235	2047096	2048727	416	314619	Partial	+
12	THCAS	I53.000015F	91.31	1634	137	5	1	1633	2198359	2196730	0	2226	2196730	2198359	150050	164987	Partial	-
	query	target	pident	length	mismatch	gaps	qstart	qend	tstart	tend	evalue	bitscore	start	end	down	up	type	direction
0	CBDAS	I59.000021F	91.4	1628	135	5	1	1627	7883914	7885537	0	2226	7883914	7885537	164989	6448	Partial	+
1	CBDAS	I59.000021F	91.376	1635	138	1	1	1635	8035177	8033546	0	2235	8033546	8035177	138364	416	Partial	-
2	CBDAS	I59.000021F	92.489	1611	121	0	25	1635	8086606	8084996	0	2305	8084996	8086606	26030	434	Partial	-
3	CBDAS	I59.000021F	89.805	1638	158	3	1	1635	8086624	8084993	0	2091	8084993	8086624	26027	416	Partial	-
4	CBDAS	I59.000021F	92.232	1635	127	0	1	1635	8127971	8126337	0	2316	8126337	8127971	22233	417	Partial	-
5	CBDAS	I59.000021F	91.865	1635	133	0	1	1635	8180883	8179249	0	2283	8179249	8180883	25884	416	Partial	-
6	THCAS	I59.000021F	100	1635	0	0	1	1635	8882558	8880924	0	3020	8880924	8882558	86508	110444	Full	-
7	CBDAS	I59.000021F	93.772	867	45	4	1	863	9002534	9003395	0	1293	9002534	9003395	8344	60643	Partial	+
8	CBDAS	I59.000021F	93.935	775	46	1	858	1632	9012836	9013609	0	1170	9012836	9013609	18646	50429	Partial	+
9	CBDAS	I59.000021F	93.712	1638	94	4	1	1635	9082961	9084592	0	2446	9082961	9084592	14913	100601	Partial	+
10	CBDAS	I59.000021F	94.814	1639	76	4	1	1635	9227157	9228790	0	2547	9227157	9228790	8567	46901	Partial	+
11	CBDAS	I59.000021F	92.506	1628	111	4	9	1635	9500701	9502318	0	2320	9500701	9502318	8194	167407	Partial	+
	query	target	pident	length	mismatch	gaps	qstart	qend	tstart	tend	evalue	bitscore	start	end	down	up	type	direction
0	CBDAS	I61.000060F	92.506	1628	111	4	9	1635	3073940	3072323	0	2320	3072323	3073940	167231	8195	Partial	-
1	CBDAS	I61.000060F	94.814	1639	76	4	1	1635	3347265	3345632	0	2547	3345632	3347265	46899	8603	Partial	-
2	CBDAS	I61.000060F	93.716	1639	93	5	1	1635	3491505	3489873	0	2447	3489873	3491505	100608	14928	Partial	-
3	CBDAS	I61.000060F	87.71	773	90	5	865	1635	3571349	3570580	0	896	3570580	3571349	60128	18673	Partial	-
4	CBDAS	I61.000060F	93.959	778	46	1	858	1635	3571353	3570577	0	1175	3570577	3571353	60125	18669	Partial	-
5	CBDAS	I61.000060F	93.887	867	44	4	1	863	3581678	3580817	0	1299	3580817	3581678	70365	8344	Partial	-
6	THCAS	I61.000060F	99.939	1636	0	1	1	1635	3703453	3705088	0	3014	3703453	3705088	83722	86516	Partial	+
7	CBDAS	I61.000083F	91.4	1628	135	5	1	1627	1198698	1200321	0	2226	1198698	1200321	30952	150132	Partial	+
8	CBDAS	I61.000083F	91.437	1635	137	1	1	1635	1350037	1348406	0	2241	1348406	1350037	180660	416	Partial	-
9	CBDAS	I61.000083F	92.427	1611	122	0	25	1635	1401467	1399857	0	2300	1399857	1401467	-1444	433	Partial	-
10	CBDAS	I61.000083F	89.744	1638	159	3	1	1635	1401485	1399854	0	2085	1399854	1401485	-1447	415	Partial	-
11	CBDAS	I61.000083F	92.115	1636	128	1	1	1635	1437877	1436242	0	2305	1436242	1437877	22236	417	Partial	-
12	CBDAS	I61.000083F	91.865	1635	133	0	1	1635	1490843	1489209	0	2283	1489209	1490843	25886	416	Partial	-
	query	target	pident	length	mismatch	gaps	qstart	qend	tstart	tend	evalue	bitscore	start	end	down	up	type	direction
0	CBDAS	I68.000083F	92.506	1628	111	4	9	1635	2416919	2415302	0	2320	2415302	2416919	167473	8166	Partial	-
1	CBDAS	I68.000083F	94.814	1639	76	4	1	1635	2690220	2688587	0	2547	2688587	2690220	-895	8568	Partial	-
2	CBDAS	I68.000083F	93.716	1639	93	5	1	1635	2834426	2832794	0	2447	2832794	2834426	60149	14919	Partial	-
3	CBDAS	I68.000083F	87.71	773	90	5	865	1635	2914256	2913487	0	896	2913487	2914256	60130	18673	Partial	-
4	CBDAS	I68.000083F	93.959	778	46	1	858	1635	2914260	2913484	0	1175	2913484	2914260	60127	18669	Partial	-
5	CBDAS	I68.000083F	93.887	867	44	4	1	863	2924584	2923723	0	1299	2923723	2924584	70366	8345	Partial	-
6	THCAS	I68.000083F	99.939	1636	0	1	1	1635	3046371	3048006	0	3014	3046371	3048006	83733	86514	Partial	+
7	CBDAS	I68.000083F	91.865	1635	133	0	1	1635	3748143	3749777	0	2283	3748143	3749777	416	25887	Partial	+
8	CBDAS	I68.000083F	92.171	1635	128	0	1	1635	3801115	3802749	0	2311	3801115	3802749	417	22236	Partial	+
9	CBDAS	I68.000083F	89.805	1638	158	3	1	1635	3842465	3844096	0	2091	3842465	3844096	416	26028	Partial	+
10	CBDAS	I68.000083F	92.441	1614	122	0	22	1635	3842480	3844093	0	2305	3842480	3844093	431	26031	Partial	+
11	CBDAS	I68.000083F	91.437	1635	137	1	1	1635	3893914	3895545	0	2241	3893914	3895545	416	304471	Partial	+
12	THCAS	I68.000083F	91.31	1634	137	5	1	1633	4045254	4043625	0	2226	4043625	4045254	150127	154762	Partial	-
	query	target	pident	length	mismatch	gaps	qstart	qend	tstart	tend	evalue	bitscore	start	end	down	up	type	direction
0	CBDAS	I75.000008F	92.506	1628	111	4	9	1635	11295130	11293513	0	2320	11293513	11295130	174154	8159	Partial	-
1	CBDAS	I75.000008F	94.814	1639	76	4	1	1635	11560049	11558416	0	2547	11558416	11560049	46890	6795	Partial	-
2	CBDAS	I75.000008F	93.712	1638	94	4	1	1635	11653256	11651625	0	2446	11651625	11653256	58391	14929	Partial	-
3	CBDAS	I75.000008F	87.71	773	90	5	865	1635	11733097	11732328	0	896	11732328	11733097	60124	18672	Partial	-
4	CBDAS	I75.000008F	93.959	778	46	1	858	1635	11733101	11732325	0	1175	11732325	11733101	60121	18668	Partial	-
5	CBDAS	I75.000008F	93.887	867	44	4	1	863	11743425	11742564	0	1299	11742564	11743425	70360	8344	Partial	-
6	THCAS	I75.000008F	99.878	1635	2	0	1	1635	11865201	11866835	0	3009	11865201	11866835	83725	49992	Full	+
7	CBDAS	I75.000008F	91.865	1635	133	0	1	1635	12567295	12568929	0	2283	12567295	12568929	416	25886	Partial	+
8	CBDAS	I75.000008F	92.171	1635	128	0	1	1635	12619832	12621466	0	2311	12619832	12621466	417	22233	Partial	+
9	CBDAS	I75.000008F	89.744	1638	159	3	1	1635	12656217	12657848	0	2085	12656217	12657848	415	26027	Partial	+
10	CBDAS	I75.000008F	92.379	1614	123	0	22	1635	12656232	12657845	0	2300	12656232	12657845	430	26030	Partial	+
11	CBDAS	I75.000008F	91.376	1635	138	1	1	1635	12707662	12709293	0	2235	12707662	12709293	416	242991	Partial	+
12	THCAS	I75.000008F	91.31	1634	137	5	1	1633	12858998	12857369	0	2226	12857369	12858998	150123	93286	Partial	-
	query	target	pident	length	mismatch	gaps	qstart	qend	tstart	tend	evalue	bitscore	start	end	down	up	type	direction
0	CBDAS	I78.000044F	92.506	1628	111	4	9	1635	4491723	4490106	0	2320	4490106	4491723	174107	8194	Partial	-
1	CBDAS	I78.000044F	94.814	1639	76	4	1	1635	4762200	4760567	0	2547	4760567	4762200	28673	8654	Partial	-
2	CBDAS	I78.000044F	93.773	1638	93	4	1	1635	4906492	4904861	0	2451	4904861	4906492	45707	14934	Partial	-
3	CBDAS	I78.000044F	87.581	773	91	5	865	1635	4976634	4975865	0	891	4975865	4976634	50427	18649	Partial	-
4	CBDAS	I78.000044F	93.83	778	47	1	858	1635	4976638	4975862	0	1170	4975862	4976638	50424	18645	Partial	-
5	CBDAS	I78.000044F	93.772	867	45	4	1	863	4986939	4986078	0	1293	4986078	4986939	60640	8344	Partial	-
6	THCAS	I78.000044F	99.939	1635	1	0	1	1635	5101489	5103123	0	3014	5101489	5103123	105018	86507	Full	+
7	CBDAS	I78.000044F	91.865	1635	133	0	1	1635	5815323	5816957	0	2283	5815323	5816957	416	25887	Partial	+
8	CBDAS	I78.000044F	92.171	1635	128	0	1	1635	5867866	5869500	0	2311	5867866	5869500	418	22236	Partial	+
9	CBDAS	I78.000044F	89.744	1638	159	3	1	1635	5904259	5905890	0	2085	5904259	5905890	415	26027	Partial	+
10	CBDAS	I78.000044F	92.379	1614	123	0	22	1635	5904274	5905887	0	2300	5904274	5905887	430	26030	Partial	+
11	CBDAS	I78.000044F	91.376	1635	138	1	1	1635	5955707	5957338	0	2235	5955707	5957338	416	236155	Partial	+
12	THCAS	I78.000044F	91.31	1634	137	5	1	1633	6106984	6105355	0	2226	6105355	6106984	150064	86509	Partial	-
	query	target	pident	length	mismatch	gaps	qstart	qend	tstart	tend	evalue	bitscore	start	end	down	up	type	direction
0	THCAS	ITLv1a.000024	91.543	1419	114	6	211	1627	846059	847473	0	1951	846059	847473	175956	136209	Partial	+
1	CBDAS	ITLv1a.000024	91.327	980	83	2	657	1635	980045	979067	0	1338	979067	980045	308964	3637	Partial	-
2	CBDAS	ITLv1a.000024	92.627	1614	119	0	22	1635	1012938	1011325	0	2322	1011325	1012938	13887	438	Partial	-
3	CBDAS	ITLv1a.000024	90.049	1638	160	2	1	1635	1012959	1011322	0	2119	1011322	1012959	13884	417	Partial	-
4	CBDAS	ITLv1a.000024	92.355	1635	125	0	1	1635	1071999	1070365	0	2327	1070365	1071999	14534	416	Partial	-
5	CBDAS	ITLv1a.000024	92.538	1635	122	0	1	1635	1104594	1102960	0	2344	1102960	1104594	18124	416	Partial	-
6	CBDAS	ITLv1a.000024	91.988	1635	131	0	1	1635	1134974	1133340	0	2294	1133340	1134974	15959	416	Partial	-
7	CBDAS	ITLv1a.000024	92.538	1635	122	0	1	1635	1188980	1187346	0	2344	1187346	1188980	29370	416	Partial	-
8	Cannabis_sativa_CBDAS_AB292682	ITLv1a.000024	99.388	1635	10	0	1	1635	1776810	1778444	0	2964	1776810	1778444	311086	145630	Partial	+
9	CBDAS	ITLv1a.000024	93.428	1628	105	2	9	1635	2183877	2185503	0	2412	2183877	2185503	97807	56841	Partial	+
10	CBCAS	ITLv1a.000100	99.817	1635	3	0	1	1635	115844	117478	0	3003	115844	117478	5663	167705	Full	+
11	CBCAS	ITLv1a.000100	99.694	1635	5	0	1	1635	171890	173524	0	2992	171890	173524	61709	111659	Full	+
12	CBCAS	ITLv1a.000100	99.817	1635	3	0	1	1635	230141	231775	0	3003	230141	231775	119960	53408	Full	+
13	CBCAS	ITLv1a.000100	99.572	1635	7	0	1	1635	319950	321584	0	2981	319950	321584	30321	53912	Full	+
14	CBDAS	ITLv1a.000100	99.633	1636	5	1	1	1635	383644	385279	0	2987	383644	385279	1971	142634	Partial	+
15	CBCAS	ITLv1a.000100	99.817	1635	3	0	1	1635	420128	421762	0	3003	420128	421762	38455	106151	Full	+
16	CBCAS	ITLv1a.000100	99.817	1635	3	0	1	1635	487704	489338	0	3003	487704	489338	106031	38575	Full	+
17	CBCAS	ITLv1a.000100	99.939	1635	1	0	1	1635	538822	540456	0	3014	538822	540456	9541	24473	Full	+
	query	target	pident	length	mismatch	gaps	qstart	qend	tstart	tend	evalue	bitscore	start	end	down	up	type	direction
0	Cannabis_sativa_CBDAS_AB292682	ITLv1b.000118	95.055	1638	74	2	1	1635	2957646	2956013	0	2569	2956013	2957646	99816	77652	Partial	-
1	CBDAS	ITLv1b.000118	94.078	1638	89	3	1	1635	3019802	3018170	0	2481	3018170	3019802	161973	15496	Partial	-
2	CBDAS	ITLv1b.000118	94.024	1640	89	4	1	1635	3097565	3095930	0	2477	3095930	3097565	52187	263890	Partial	-
3	THCAS	ITLv1b.000118	99.817	1635	3	0	1	1635	3192837	3194471	0	3003	3192837	3194471	149094	166984	Full	+
4	CBDAS	ITLv1b.000118	92.355	1635	125	0	1	1635	3922944	3924578	0	2327	3922944	3924578	417	58023	Partial	+
5	CBDAS	ITLv1b.000118	92.232	1635	127	0	1	1635	3996588	3998222	0	2316	3996588	3998222	417	16548	Partial	+
6	CBDAS	ITLv1b.000118	92.232	1635	127	0	1	1635	4024469	4026103	0	2316	4024469	4026103	416	26038	Partial	+
7	CBDAS	ITLv1b.000118	91.621	1635	137	0	1	1635	4071833	4073467	0	2261	4071833	4073467	416	251272	Partial	+
8	THCAS	ITLv1b.000118	91.493	1634	134	5	1	1633	4209884	4208255	0	2242	4208255	4209884	136838	114855	Partial	-
9	CBDAS	ITLv1b.000118	92.211	1194	93	0	442	1635	4647655	4648848	0	1690	4647655	4648848	14230	15988	Partial	+
10	CBDAS	ITLv1b.000118	92.477	1635	123	0	1	1635	4705064	4706698	0	2338	4705064	4706698	416	16036	Partial	+
11	CBDAS	ITLv1b.000118	92.294	1635	126	0	1	1635	4745180	4746814	0	2322	4745180	4746814	416	24078	Partial	+
12	CBDAS	ITLv1b.000118	92.416	1635	124	0	1	1635	4791666	4793300	0	2333	4791666	4793300	416	15958	Partial	+
13	THCAS	ITLv1b.000118	91.222	1424	121	4	211	1633	4936300	4934880	0	1934	4934880	4936300	114904	257113	Partial	-
14	CBCAS	ITLv1b.000099	99.817	1635	3	0	1	1635	115844	117478	0	3003	115844	117478	94647	73935	Full	+
15	CBCAS	ITLv1b.000099	99.694	1635	5	0	1	1635	171890	173524	0	2992	171890	173524	150693	17889	Full	+
16	CBCAS	ITLv1b.000099	99.817	1635	3	0	1	1635	230141	231775	0	3003	230141	231775	29625	99804	Full	+
17	CBCAS	ITLv1b.000099	99.572	1635	7	0	1	1635	319950	321584	0	2981	319950	321584	119434	9995	Full	+
18	CBDAS	ITLv1b.000099	99.633	1636	5	1	1	1635	383644	385279	0	2987	383644	385279	1971	461258	Partial	+
19	CBCAS	ITLv1b.000099	99.817	1635	3	0	1	1635	420128	421762	0	3003	420128	421762	38455	424775	Full	+
20	CBCAS	ITLv1b.000099	99.817	1635	3	0	1	1635	487704	489338	0	3003	487704	489338	106031	357199	Full	+
21	CBCAS	ITLv1b.000099	99.939	1635	1	0	1	1635	538822	540456	0	3014	538822	540456	157149	306081	Full	+
	query	target	pident	length	mismatch	gaps	qstart	qend	tstart	tend	evalue	bitscore	start	end	down	up	type	direction
0	CBDAS	JLDSH.0213	92.506	1628	111	4	9	1635	863637	862020	0	2320	862020	863637	-3643	8194	Partial	-
1	CBDAS	JLDSH.0213	95.022	1386	64	3	254	1635	1137054	1135670	0	2172	1135670	1137054	46886	7009	Partial	-
2	CBDAS	JLDSH.0213	93.59	1638	96	4	1	1635	1237390	1235759	0	2435	1235759	1237390	34605	3990	Partial	-
3	CBDAS	JLDSH.0213	87.581	773	90	6	865	1635	1300779	1300011	0	891	1300011	1300779	57476	25894	Partial	-
4	CBDAS	JLDSH.0213	93.702	778	47	2	858	1635	1300783	1300008	0	1164	1300008	1300783	57473	25890	Partial	-
5	CBDAS	JLDSH.0213	93.887	867	44	4	1	863	1318328	1317467	0	1299	1317467	1318328	74932	8345	Partial	-
6	THCAS	JLDSH.0213	100	1635	0	0	1	1635	1438283	1439917	0	3020	1438283	1439917	43135	-945	Full	+
7	CBDAS	JLDSH.0194	92.049	1635	130	0	1	1635	397808	399442	0	2300	397808	399442	416	15962	Partial	+
8	CBDAS	JLDSH.0194	92.538	1635	122	0	1	1635	428205	429839	0	2344	428205	429839	416	4984	Partial	+
9	CBDAS	JLDSH.0194	92.355	1635	125	0	1	1635	462556	464190	0	2327	462556	464190	416	14537	Partial	+
10	CBDAS	JLDSH.0194	92.416	1635	124	0	1	1635	521801	523435	0	2333	521801	523435	415	-3837	Partial	+
11	CBDAS	JLDSH.0194	91.327	980	83	2	657	1635	553813	554791	0	1338	553813	554791	3636	10651	Partial	+
12	CBDAS	JLDSH.0194	91.298	1425	118	6	211	1633	680127	678707	0	1940	678707	680127	12388	11006	Partial	-
13	CBDAS	JLDSH.0034	91.865	1635	133	0	1	1635	572471	574105	0	2283	572471	574105	416	25885	Partial	+
14	CBDAS	JLDSH.0034	92.294	1635	126	0	1	1635	625412	627046	0	2322	625412	627046	417	22232	Partial	+
15	CBDAS	JLDSH.0034	89.805	1638	158	3	1	1635	666734	668365	0	2091	666734	668365	415	22768	Partial	+
16	CBDAS	JLDSH.0034	92.441	1614	122	0	22	1635	666749	668362	0	2305	666749	668362	430	22771	Partial	+
17	CBDAS	JLDSH.0034	91.376	1635	138	1	1	1635	718182	719813	0	2235	718182	719813	416	122650	Partial	+
18	CBDAS	JLDSH.0034	91.31	1634	137	5	1	1633	862456	860827	0	2226	860827	862456	-4836	9375	Partial	-
19	CBCAS	JLDSH.0161	99.939	1635	1	0	1	1635	1533174	1531540	0	3014	1531540	1533174	52163	-557	Full	-
20	CBCAS	JLDSH.0161	99.817	1635	3	0	1	1635	1584268	1582634	0	3003	1582634	1584268	6623	138309	Full	-
21	CBCAS	JLDSH.0161	99.817	1635	3	0	1	1635	1644572	1642938	0	3003	1642938	1644572	66927	78005	Full	-
22	CBDAS	JLDSH.0161	99.389	1637	3	7	1	1635	1682599	1680968	0	2961	1680968	1682599	104957	39978	Partial	-
23	CBDAS	JLDSH.0161	99.633	1636	5	1	1	1635	1720621	1718986	0	2987	1718986	1720621	142975	1956	Partial	-
24	CBCAS	JLDSH.0161	99.694	1635	5	0	1	1635	1784302	1782668	0	2992	1782668	1784302	35557	184653	Full	-
25	CBCAS	JLDSH.0161	99.633	1635	4	2	1	1635	1899072	1897440	0	2985	1897440	1899072	150329	69883	Partial	-
26	CBCAS	JLDSH.0161	99.755	1635	4	0	1	1635	1957288	1955654	0	2998	1955654	1957288	208543	11667	Full	-
27	CBCAS	JLDSH.0161	99.817	1635	3	0	1	1635	2032923	2031289	0	3003	2031289	2032923	61145	76754	Full	-
	query	target	pident	length	mismatch	gaps	qstart	qend	tstart	tend	evalue	bitscore	start	end	down	up	type	direction
0	CBDAS	JLD.015	100	1635	0	0	1	1635	475398	473764	0	3020	473764	475398	1806	27773	Full	-
1	CBDAS	JLD.015	92.049	1635	130	0	1	1635	1130341	1131975	0	2300	1130341	1131975	416	15961	Partial	+
2	CBDAS	JLD.015	92.538	1635	122	0	1	1635	1160736	1162370	0	2344	1160736	1162370	416	24291	Partial	+
3	CBDAS	JLD.015	92.355	1635	125	0	1	1635	1195090	1196724	0	2327	1195090	1196724	416	14537	Partial	+
4	CBDAS	JLD.015	92.416	1635	124	0	1	1635	1254347	1255981	0	2333	1254347	1255981	416	14061	Partial	+
5	CBDAS	JLD.015	91.327	980	83	2	657	1635	1286359	1287337	0	1338	1286359	1287337	3636	161973	Partial	+
6	CBDAS	JLD.015	91.298	1425	118	6	211	1633	1412674	1411254	0	1940	1411254	1412674	128531	36636	Partial	-
7	CBCAS	JLD.452	99.694	1635	5	0	1	1635	25455	23821	0	2992	23821	25455		137969	Full	-
8	CBCAS	JLD.452	99.755	1635	4	0	1	1635	140249	138615	0	2998	138615	140249		23175	Full	-
9	CBCAS	JLD.452	99.939	1635	1	0	1	1635	198509	196875	0	3014	196875	198509	32102	39982	Full	-
10	CBDAS	JLD.452	99.633	1636	5	1	1	1635	236536	234901	0	2987	234901	236536	70128	1955	Partial	-
	query	target	pident	length	mismatch	gaps	qstart	qend	tstart	tend	evalue	bitscore	start	end	down	up	type	direction
0	THCAS	JLF.0412	91.402	1419	116	6	211	1627	1086336	1087750	0	1940	1086336	1087750	130519	128534	Partial	+
1	CBDAS	JLF.0412	91.327	980	83	2	657	1635	1212648	1211670	0	1338	1211670	1212648	255853	3636	Partial	-
2	CBDAS	JLF.0412	92.416	1635	124	0	1	1635	1244660	1243026	0	2333	1243026	1244660	14061	415	Partial	-
3	CBDAS	JLF.0412	92.416	1635	124	0	1	1635	1303313	1301679	0	2333	1301679	1303313	14039	416	Partial	-
4	CBDAS	JLF.0412	92.355	1635	125	0	1	1635	1362565	1360931	0	2327	1360931	1362565	14537	416	Partial	-
5	CBDAS	JLF.0412	92.538	1635	122	0	1	1635	1396916	1395282	0	2344	1395282	1396916	24291	416	Partial	-
6	CBDAS	JLF.0412	92.049	1635	130	0	1	1635	1427308	1425674	0	2300	1425674	1427308	15961	416	Partial	-
7	CBDAS	JLF.0412	100	1635	0	0	1	1635	2082227	2083861	0	3020	2082227	2083861	32932	10280	Full	+
8	THCAS	JLF.1301	91.4	1628	135	5	1	1627	3413194	3414817	0	2226	3413194	3414817	205592	143067	Partial	+
9	CBDAS	JLF.1301	91.376	1635	138	1	1	1635	3557468	3555837	0	2235	3555837	3557468	348235	416	Partial	-
10	CBDAS	JLF.1301	92.489	1611	121	0	25	1635	3608897	3607287	0	2305	3607287	3608897	26029	433	Partial	-
11	CBDAS	JLF.1301	89.805	1638	158	3	1	1635	3608915	3607284	0	2091	3607284	3608915	26026	415	Partial	-
12	CBDAS	JLF.1301	92.294	1635	126	0	1	1635	3650238	3648604	0	2322	3648604	3650238	22232	417	Partial	-
13	CBDAS	JLF.1301	91.865	1635	133	0	1	1635	3703178	3701544	0	2283	3701544	3703178	25883	416	Partial	-
14	THCAS	JLF.1301	100	1635	0	0	1	1635	4417827	4416193	0	3020	4416193	4417827	92698	90125	Full	-
15	CBDAS	JLF.1301	93.887	867	44	4	1	863	4537794	4538655	0	1299	4537794	4538655	8345	140011	Partial	+
16	CBDAS	JLF.1301	93.806	775	46	2	858	1632	4555340	4556112	0	1164	4555340	4556112	25891	122554	Partial	+
17	CBDAS	JLF.1301	93.59	1638	96	4	1	1635	4618735	4620366	0	2435	4618735	4620366	89286	58300	Partial	+
18	CBDAS	JLF.1301	95.022	1386	64	3	254	1635	4719071	4720455	0	2172	4719071	4720455	7009	46889	Partial	+
19	CBDAS	JLF.1301	92.506	1628	111	4	9	1635	4992493	4994110	0	2320	4992493	4994110	8194	167400	Partial	+
20	CBCAS	JLF.1308	99.817	1635	3	0	1	1635	2637304	2638938	0	3003	2637304	2638938	277632	241522	Full	+
21	CBCAS	JLF.1308	99.755	1635	4	0	1	1635	2712942	2714576	0	2998	2712942	2714576	353270	165884	Full	+
22	CBCAS	JLF.1308	99.755	1635	4	0	1	1635	2771192	2772826	0	2998	2771192	2772826	411520	107634	Full	+
23	CBCAS	JLF.1308	99.694	1635	5	0	1	1635	2885990	2887624	0	2992	2885990	2887624	1738	53915	Full	+
24	CBDAS	JLF.1308	99.633	1636	5	1	1	1635	2949671	2951306	0	2987	2949671	2951306	1955	164695	Partial	+
25	CBCAS	JLF.1308	99.817	1635	3	0	1	1635	2987699	2989333	0	3003	2987699	2989333	39983	126668	Full	+
26	CBCAS	JLF.1308	99.817	1635	3	0	1	1635	3048002	3049636	0	3003	3048002	3049636	100286	66365	Full	+
27	CBCAS	JLF.1308	99.939	1635	1	0	1	1635	3099103	3100737	0	3014	3099103	3100737	151387	15264	Full	+
	query	target	pident	length	mismatch	gaps	qstart	qend	tstart	tend	evalue	bitscore	start	end	down	up	type	direction
0	THCAS	JLM.0314	91.402	1419	116	6	211	1627	197976	199390	0	1940	197976	199390	153129	93535	Partial	+
1	CBDAS	JLM.0314	91.327	980	83	2	657	1635	324274	323296	0	1338	323296	324274	29025	3636	Partial	-
2	CBDAS	JLM.0314	92.416	1635	124	0	1	1635	356285	354651	0	2333	354651	356285	14061	416	Partial	-
3	CBDAS	JLM.0314	92.355	1635	125	0	1	1635	415541	413907	0	2327	413907	415541	14537	416	Partial	-
4	CBDAS	JLM.0314	92.538	1635	122	0	1	1635	449894	448260	0	2344	448260	449894	24291	416	Partial	-
5	CBDAS	JLM.0314	92.049	1635	130	0	1	1635	480291	478657	0	2300	478657	480291	15961	416	Partial	-
6	CBDAS	JLM.0314	100	1635	0	0	1	1635	1135223	1136857	0	3020	1135223	1136857	32932	10280	Full	+
	query	target	pident	length	mismatch	gaps	qstart	qend	tstart	tend	evalue	bitscore	start	end	down	up	type	direction
0	CBDAS	JL.chr4	92.383	1628	113	4	9	1635	89697628	89696011	0	2309	89696011	89697628	71244	15454	Partial	-
1	CBDAS	JL.chr4	93.427	1643	79	20	1	1635	89962317	89960696	0	2409	89960696	89962317	46868	6712	Partial	-
2	THCAS	JL.chr4	99.266	1635	12	0	1	1635	91579693	91578059	0	2953	91578059	91579693	86499	90060	Partial	-
3	CBDAS	JL.chr4	93.887	867	44	4	1	863	91699899	91700760	0	1299	91699899	91700760	8649	70309	Partial	+
4	CBDAS	JL.chr4	93.935	775	46	1	858	1632	91710215	91710988	0	1170	91710215	91710988	18965	60081	Partial	+
5	CBDAS	JL.chr4	93.773	1638	93	4	1	1635	91789995	91791626	0	2451	91789995	91791626	14907	59259	Partial	+
6	CBDAS	JL.chr4	94.814	1639	76	4	1	1635	91891053	91892686	0	2547	91891053	91892686	6794	46888	Partial	+
7	CBCAS	JL.chr4	92.383	1628	113	4	9	1635	92151536	92153153	0	2309	92151536	92153153	207435	135513	Partial	+
	query	target	pident	length	mismatch	gaps	qstart	qend	tstart	tend	evalue	bitscore	start	end	down	up	type	direction
0	CBDAS	KCDv1a.chr7	93.428	1628	105	2	9	1635	10791520	10789894	0	2412	10789894	10791520	56878	106271	Partial	-
1	CBDAS	KCDv1a.chr7	99.388	1635	10	0	1	1635	11207056	11205422	0	2964	11205422	11207056	145631	41213	Partial	-
2	CBDAS	KCDv1a.chr7	92.477	1635	123	0	1	1635	11800149	11801783	0	2338	11800149	11801783	416	24001	Partial	+
3	CBDAS	KCDv1a.chr7	91.988	1635	131	0	1	1635	11854150	11855784	0	2294	11854150	11855784	416	15961	Partial	+
4	CBDAS	KCDv1a.chr7	92.538	1635	122	0	1	1635	11884531	11886165	0	2344	11884531	11886165	415	18124	Partial	+
5	CBDAS	KCDv1a.chr7	92.355	1635	125	0	1	1635	11917127	11918761	0	2327	11917127	11918761	416	14534	Partial	+
6	CBDAS	KCDv1a.chr7	92.355	1635	125	0	1	1635	11976173	11977807	0	2327	11976173	11977807	417	13886	Partial	+
7	CBDAS	KCDv1a.chr7	91.327	980	83	2	657	1635	12009071	12010049	0	1338	12009071	12010049	3635	211824	Partial	+
8	THCAS	KCDv1a.chr7	91.439	1425	116	6	211	1633	12143056	12141636	0	1951	12141636	12143056	136200	78817	Partial	-
9	CBCAS	KCDv1a.chr7	99.817	1635	3	0	1	1635	29915220	29913586	0	3003	29913586	29915220	81841	8562	Full	-
10	CBCAS	KCDv1a.chr7	99.755	1635	4	0	1	1635	29977063	29975429	0	2998	29975429	29977063	44929	210728	Full	-
11	Cannabis_sativa_CBDAS_AB292682	KCDv1a.chr7	88.226	620	69	4	1018	1635	30010278	30009661	0	737	30009661	30010278	79161	177513	Partial	-
12	CBCAS	KCDv1a.chr7	100	616	0	0	1020	1635	30010279	30009664	0	1138	30009664	30010279	79164	177512	Full	-
13	CBCAS	KCDv1a.chr7	99.902	1022	1	0	1	1022	30021247	30020226	0	1882	30020226	30021247	89726	166544	Full	-
14	CBCAS	KCDv1a.chr7	99.878	1635	2	0	1	1635	30092164	30090530	0	3009	30090530	30092164	160030	95627	Full	-
15	CBCAS	KCDv1a.chr7	99.817	1635	3	0	1	1635	30166756	30165122	0	3003	30165122	30166756	234622	21035	Full	-
16	CBCAS	KCDv1a.chr7	99.878	1635	2	0	1	1635	30244819	30243185	0	3009	30243185	30244819	51752	75918	Full	-
17	CBCAS	KCDv1a.chr7	99.694	1635	5	0	1	1635	30331368	30329734	0	2992	30329734	30331368	2822	75782	Full	-
18	CBCAS	KCDv1a.chr7	99.878	1635	2	0	1	1635	30390303	30388669	0	3009	30388669	30390303	61757	16847	Full	-
19	CBCAS	KCDv1a.chr7	99.755	1635	4	0	1	1635	30414304	30412670	0	2998	30412670	30414304	1202	17899	Full	-
20	CBDAS	KCDv1a.chr7	99.755	1635	2	2	1	1635	30466044	30464412	0	2996	30464412	30466044	27839	79314	Partial	-
	query	target	pident	length	mismatch	gaps	qstart	qend	tstart	tend	evalue	bitscore	start	end	down	up	type	direction
0	CBDAS	KCDv1b.chr7	93.428	1628	105	2	9	1635	9708435	9706809	0	2412	9706809	9708435	56874	97805	Partial	-
1	Cannabis_sativa_CBDAS_AB292682	KCDv1b.chr7	99.388	1635	10	0	1	1635	10115448	10113814	0	2964	10113814	10115448	145564	294353	Partial	-
2	CBDAS	KCDv1b.chr7	92.477	1635	123	0	1	1635	10705022	10706656	0	2338	10705022	10706656	416	29371	Partial	+
3	CBDAS	KCDv1b.chr7	91.988	1635	131	0	1	1635	10759029	10760663	0	2294	10759029	10760663	416	15961	Partial	+
4	CBDAS	KCDv1b.chr7	92.538	1635	122	0	1	1635	10789404	10791038	0	2344	10789404	10791038	416	18124	Partial	+
5	CBDAS	KCDv1b.chr7	92.355	1635	125	0	1	1635	10822003	10823637	0	2327	10822003	10823637	416	14534	Partial	+
6	CBDAS	KCDv1b.chr7	92.355	1635	125	0	1	1635	10881052	10882686	0	2327	10881052	10882686	417	13238	Partial	+
7	CBDAS	KCDv1b.chr7	91.327	980	83	2	657	1635	10910644	10911622	0	1338	10910644	10911622	3636	67866	Partial	+
8	CBDAS	KCDv1b.chr7	91.368	1425	117	6	211	1633	11044623	11043203	0	1945	11043203	11044623	59026	175923	Partial	-
9	CBCAS	KCDv1b.chr7	99.817	1635	3	0	1	1635	28127696	28126062	0	3003	28126062	28127696	22372	272571	Full	-
10	CBCAS	KCDv1b.chr7	99.755	1635	4	0	1	1635	28189539	28187905	0	2998	28187905	28189539	84215	210728	Full	-
11	Cannabis_sativa_CBDAS_AB292682	KCDv1b.chr7	88.226	620	69	4	1018	1635	28222754	28222137	0	737	28222137	28222754	118447	177513	Partial	-
12	CBCAS	KCDv1b.chr7	100	616	0	0	1020	1635	28222755	28222140	0	1138	28222140	28222755	118450	177512	Full	-
13	CBCAS	KCDv1b.chr7	99.902	1022	1	0	1	1022	28233723	28232702	0	1882	28232702	28233723	129012	166544	Full	-
14	CBCAS	KCDv1b.chr7	99.878	1635	2	0	1	1635	28304640	28303006	0	3009	28303006	28304640	199316	95627	Full	-
15	CBCAS	KCDv1b.chr7	99.817	1635	3	0	1	1635	28379232	28377598	0	3003	28377598	28379232	273908	21035	Full	-
16	CBCAS	KCDv1b.chr7	99.878	1635	2	0	1	1635	28457295	28455661	0	3009	28455661	28457295	51752	75918	Full	-
17	CBCAS	KCDv1b.chr7	99.694	1635	5	0	1	1635	28543844	28542210	0	2992	28542210	28543844	2822	23061	Full	-
18	CBCAS	KCDv1b.chr7	99.878	1635	2	0	1	1635	28602779	28601145	0	3009	28601145	28602779	25176	155055	Full	-
19	CBCAS	KCDv1b.chr7	99.755	1635	4	0	1	1635	28626780	28625146	0	2998	28625146	28626780	49177	131054	Full	-
20	CBCAS	KCDv1b.chr7	99.755	1635	2	2	1	1635	28678520	28676888	0	2996	28676888	28678520	100919	79314	Partial	-
	query	target	pident	length	mismatch	gaps	qstart	qend	tstart	tend	evalue	bitscore	start	end	down	up	type	direction
0	CBDAS	KOMPa.chr7	93.428	1628	105	2	9	1635	10015197	10013571	0	2412	10013571	10015197	56879	97815	Partial	-
1	CBDAS	KOMPa.chr7	99.388	1635	10	0	1	1635	10422286	10420652	0	2964	10420652	10422286	20093	311573	Partial	-
2	CBDAS	KOMPa.chr7	92.477	1635	123	0	1	1635	11016372	11018006	0	2338	11016372	11018006	416	29370	Partial	+
3	CBDAS	KOMPa.chr7	91.988	1635	131	0	1	1635	11070377	11072011	0	2294	11070377	11072011	416	15961	Partial	+
4	CBDAS	KOMPa.chr7	92.538	1635	122	0	1	1635	11100758	11102392	0	2344	11100758	11102392	415	18124	Partial	+
5	CBDAS	KOMPa.chr7	92.355	1635	125	0	1	1635	11133354	11134988	0	2327	11133354	11134988	416	14534	Partial	+
6	CBDAS	KOMPa.chr7	92.355	1635	125	0	1	1635	11192400	11194034	0	2327	11192400	11194034	417	13886	Partial	+
7	CBDAS	KOMPa.chr7	91.327	980	83	2	657	1635	11225297	11226275	0	1338	11225297	11226275	3635	66108	Partial	+
8	CBDAS	KOMPa.chr7	91.439	1425	116	6	211	1633	11359281	11357861	0	1951	11357861	11359281	56375	115291	Partial	-
9	CBCAS	KOMPa.chr7	99.817	1635	3	0	1	1635	28805514	28803880	0	3003	28803880	28805514	81844	272571	Full	-
10	CBCAS	KOMPa.chr7	99.755	1635	4	0	1	1635	28867357	28865723	0	2998	28865723	28867357	143687	210728	Full	-
11	Cannabis_sativa_CBDAS_AB292682	KOMPa.chr7	88.226	620	69	4	1018	1635	28900572	28899955	0	737	28899955	28900572	177919	177513	Partial	-
12	CBCAS	KOMPa.chr7	100	616	0	0	1020	1635	28900573	28899958	0	1138	28899958	28900573	177922	177512	Full	-
13	CBCAS	KOMPa.chr7	99.902	1022	1	0	1	1022	28911541	28910520	0	1882	28910520	28911541	188484	166544	Full	-
14	CBCAS	KOMPa.chr7	99.878	1635	2	0	1	1635	28982458	28980824	0	3009	28980824	28982458	258788	95627	Full	-
15	CBCAS	KOMPa.chr7	99.817	1635	3	0	1	1635	29057050	29055416	0	3003	29055416	29057050	333380	21035	Full	-
16	CBCAS	KOMPa.chr7	99.878	1635	2	0	1	1635	29135113	29133479	0	3009	29133479	29135113	51752	75918	Full	-
17	CBCAS	KOMPa.chr7	99.694	1635	5	0	1	1635	29221662	29220028	0	2992	29220028	29221662	2822	213999	Full	-
18	CBCAS	KOMPa.chr7	99.878	1635	2	0	1	1635	29280610	29278976	0	3009	29278976	29280610	61770	155051	Full	-
19	CBCAS	KOMPa.chr7	99.755	1635	4	0	1	1635	29304611	29302977	0	2998	29302977	29304611	85771	131050	Full	-
20	CBCAS	KOMPa.chr7	99.755	1635	2	2	1	1635	29356351	29354719	0	2996	29354719	29356351	137513	79310	Partial	-
	query	target	pident	length	mismatch	gaps	qstart	qend	tstart	tend	evalue	bitscore	start	end	down	up	type	direction
0	CBDAS	KOMPb.chr7	93.428	1628	105	2	9	1635	10053660	10052034	0	2412	10052034	10053660	56879	97815	Partial	-
1	Cannabis_sativa_CBDAS_AB292682	KOMPb.chr7	99.388	1635	10	0	1	1635	10460749	10459115	0	2964	10459115	10460749	145631	305382	Partial	-
2	CBDAS	KOMPb.chr7	92.477	1635	123	0	1	1635	11048644	11050278	0	2338	11048644	11050278	416	29370	Partial	+
3	CBDAS	KOMPb.chr7	91.988	1635	131	0	1	1635	11102649	11104283	0	2294	11102649	11104283	416	15961	Partial	+
4	CBDAS	KOMPb.chr7	92.538	1635	122	0	1	1635	11133030	11134664	0	2344	11133030	11134664	415	18124	Partial	+
5	CBDAS	KOMPb.chr7	92.355	1635	125	0	1	1635	11165626	11167260	0	2327	11165626	11167260	416	14534	Partial	+
6	CBDAS	KOMPb.chr7	92.355	1635	125	0	1	1635	11224672	11226306	0	2327	11224672	11226306	417	13886	Partial	+
7	CBDAS	KOMPb.chr7	91.327	980	83	2	657	1635	11257569	11258547	0	1338	11257569	11258547	3635	308962	Partial	+
8	THCAS	KOMPb.chr7	91.439	1425	116	6	211	1633	11391553	11390133	0	1951	11390133	11391553	136199	175956	Partial	-
9	CBCAS	KOMPb.chr7	99.817	1635	3	0	1	1635	28908563	28906929	0	3003	28906929	28908563	61496	67124	Full	-
10	CBCAS	KOMPb.chr7	99.755	1635	4	0	1	1635	28970406	28968772	0	2998	28968772	28970406	123339	5281	Full	-
11	CBDAS	KOMPb.chr7	88.226	620	69	4	1018	1635	29003621	29003004	0	737	29003004	29003621	16470	177513	Partial	-
12	CBCAS	KOMPb.chr7	100	616	0	0	1020	1635	29003622	29003007	0	1138	29003007	29003622	16473	177512	Full	-
13	CBCAS	KOMPb.chr7	99.902	1022	1	0	1	1022	29014590	29013569	0	1882	29013569	29014590	27035	166544	Full	-
14	CBCAS	KOMPb.chr7	99.817	1635	3	0	1	1635	29085507	29083873	0	3003	29083873	29085507	97339	95627	Full	-
15	CBCAS	KOMPb.chr7	99.817	1635	3	0	1	1635	29160099	29158465	0	3003	29158465	29160099	171931	21035	Full	-
16	CBCAS	KOMPb.chr7	99.878	1635	2	0	1	1635	29238162	29236528	0	3009	29236528	29238162	51752	75918	Full	-
17	CBCAS	KOMPb.chr7	99.694	1635	5	0	1	1635	29324711	29323077	0	2992	29323077	29324711	2822	50955	Full	-
18	CBCAS	KOMPb.chr7	99.878	1635	2	0	1	1635	29383659	29382025	0	3009	29382025	29383659	2717	155051	Full	-
19	CBCAS	KOMPb.chr7	99.755	1635	4	0	1	1635	29407660	29406026	0	2998	29406026	29407660	26718	131050	Full	-
20	CBCAS	KOMPb.chr7	99.755	1635	2	2	1	1635	29459400	29457768	0	2996	29457768	29459400	78460	79310	Partial	-
	query	target	pident	length	mismatch	gaps	qstart	qend	tstart	tend	evalue	bitscore	start	end	down	up	type	direction
0	CBDAS	LP10.00003682	91.4	1628	135	5	1	1627	1335370	1336993	0	2226	1335370	1336993	47356	85369	Partial	+
1	CBDAS	LP10.00003682	91.376	1635	138	1	1	1635	1486710	1485079	0	2235	1485079	1486710	57390	416	Partial	-
2	CBDAS	LP10.00003682	92.427	1611	122	0	25	1635	1538135	1536525	0	2300	1536525	1538135	18627	433	Partial	-
3	CBDAS	LP10.00003682	89.744	1638	159	3	1	1635	1538153	1536522	0	2085	1536522	1538153	18624	415	Partial	-
4	CBDAS	LP10.00003682	92.171	1635	128	0	1	1635	1574538	1572904	0	2311	1572904	1574538	9892	417	Partial	-
5	CBDAS	LP10.00003682	91.865	1635	133	0	1	1635	1627073	1625439	0	2283	1625439	1627073	13138	416	Partial	-
6	THCAS	LP10.00003682	99.939	1635	1	0	1	1635	2318853	2317219	0	3014	2317219	2318853	57080	83722	Full	-
7	CBDAS	LP10.00003682	93.887	867	44	4	1	863	2440627	2441488	0	1299	2440627	2441488	8344	3103	Partial	+
8	CBDAS	LP10.00003682	94.065	775	45	1	858	1632	2450951	2451724	0	1175	2450951	2451724	2721	6790	Partial	+
9	CBDAS	LP10.00003682	93.773	1638	93	4	1	1635	2530797	2532428	0	2451	2530797	2532428	14929	58389	Partial	+
10	CBDAS	LP10.00003682	94.814	1639	76	4	1	1635	2624002	2625635	0	2547	2624002	2625635	2051	13989	Partial	+
11	CBDAS	LP10.00003682	92.506	1628	111	4	9	1635	2888925	2890542	0	2320	2888925	2890542	8159	26753	Partial	+
12	THCAS	LP10.00001222	91.4	1628	135	5	1	1627	1349833	1351456	0	2226	1349833	1351456	61819	70906	Partial	+
13	CBDAS	LP10.00001222	91.376	1635	138	1	1	1635	1494109	1492478	0	2235	1492478	1494109	1731	416	Partial	-
14	CBDAS	LP10.00001222	92.489	1611	121	0	25	1635	1545537	1543927	0	2305	1543927	1545537	-1184	121	Partial	-
15	CBDAS	LP10.00001222	89.805	1638	158	3	1	1635	1545555	1543924	0	2091	1543924	1545555	-1187	103	Partial	-
16	CBDAS	LP10.00001222	92.294	1635	126	0	1	1635	1586878	1585244	0	2322	1585244	1586878	6605	417	Partial	-
17	CBDAS	LP10.00001222	91.865	1635	133	0	1	1635	1639820	1638186	0	2283	1638186	1639820	4084	416	Partial	-
18	THCAS	LP10.00001222	100	1635	0	0	1	1635	2354467	2352833	0	3020	2352833	2354467	92694	48108	Full	-
19	CBDAS	LP10.00001222	93.887	867	44	4	1	863	2474433	2475294	0	1299	2474433	2475294	8345	36555	Partial	+
20	CBDAS	LP10.00001222	93.806	775	46	2	858	1632	2491979	2492751	0	1164	2491979	2492751	25891	19098	Partial	+
21	CBDAS	LP10.00001222	93.59	1638	96	4	1	1635	2555375	2557006	0	2435	2555375	2557006	39507	33811	Partial	+
22	CBDAS	LP10.00001222	95.022	1386	64	3	254	1635	2655711	2657095	0	2172	2655711	2657095	7009	4526	Partial	+
23	CBDAS	LP10.00001222	92.506	1628	111	4	9	1635	2929131	2930748	0	2320	2929131	2930748	8194	136437	Partial	+
24	CBCAS	LP10.00003838	99.939	1635	1	0	1	1635	2759100	2757466	0	3014	2757466	2759100	48957	110804	Full	-
25	CBCAS	LP10.00003838	99.878	1635	2	0	1	1635	2846981	2845347	0	3009	2845347	2846981	136838	22923	Full	-
26	CBDAS	LP10.00003838	99.756	1636	3	1	1	1635	2894829	2893194	0	2998	2893194	2894829	12428	22466	Partial	-
27	CBCAS	LP10.00003838	99.878	1635	2	0	1	1635	2958852	2957218	0	3009	2957218	2958852	36281	108333	Full	-
28	CBCAS	LP10.00003838	99.571	1166	5	0	1	1166	3032486	3031321	0	2126	3031321	3032486	110384	34699	Full	-
29	CBCAS	LP10.00003838	99.633	1635	6	0	1	1635	3078819	3077185	0	2987	3077185	3078819	6521	19331	Full	-
30	CBCAS	LP10.00003838	99.572	1635	7	0	1	1635	3135395	3133761	0	2981	3133761	3135395	32132	35598	Full	-
	query	target	pident	length	mismatch	gaps	qstart	qend	tstart	tend	evalue	bitscore	start	end	down	up	type	direction
0	CBDAS	LP6.00001121	91.4	1628	135	5	1	1627	7232813	7234436	0	2226	7232813	7234436	2964	150129	Partial	+
1	CBDAS	LP6.00001121	91.376	1635	138	1	1	1635	7384149	7382518	0	2235	7382518	7384149	152669	416	Partial	-
2	CBDAS	LP6.00001121	92.427	1611	122	0	25	1635	7435573	7433963	0	2300	7433963	7435573	26030	433	Partial	-
3	CBDAS	LP6.00001121	89.744	1638	159	3	1	1635	7435591	7433960	0	2085	7433960	7435591	26027	415	Partial	-
4	CBDAS	LP6.00001121	92.171	1635	128	0	1	1635	7471976	7470342	0	2311	7470342	7471976	-6679	417	Partial	-
5	CBDAS	LP6.00001121	91.865	1635	133	0	1	1635	7524511	7522877	0	2283	7522877	7524511	25886	416	Partial	-
6	THCAS	LP6.00001121	99.939	1635	1	0	1	1635	8216292	8214658	0	3014	8214658	8216292	14839	83722	Full	-
7	CBDAS	LP6.00001121	93.887	867	44	4	1	863	8338065	8338926	0	1299	8338065	8338926	8344	65518	Partial	+
8	CBDAS	LP6.00001121	94.065	775	45	1	858	1632	8348389	8349162	0	1175	8348389	8349162	18668	55282	Partial	+
9	CBDAS	LP6.00001121	93.773	1638	93	4	1	1635	8428234	8429865	0	2451	8428234	8429865	13331	40800	Partial	+
10	CBDAS	LP6.00001121	94.814	1639	76	4	1	1635	8521439	8523072	0	2547	8521439	8523072	6795	-737	Partial	+
11	CBDAS	LP6.00001121	92.506	1628	111	4	9	1635	8786360	8787977	0	2320	8786360	8787977	8159	176643	Partial	+
12	CBCAS	LP6.00000578	99.939	1635	1	0	1	1635	2758961	2757327	0	3014	2757327	2758961	75453	159941	Full	-
13	CBCAS	LP6.00000578	99.878	1635	2	0	1	1635	2846841	2845207	0	3009	2845207	2846841	163333	72061	Full	-
14	CBDAS	LP6.00000578	99.756	1636	3	1	1	1635	2894689	2893054	0	2998	2893054	2894689	211180	24213	Partial	-
15	CBCAS	LP6.00000578	99.878	1635	2	0	1	1635	2958712	2957078	0	3009	2957078	2958712	32510	28910	Full	-
16	CBCAS	LP6.00000578	99.571	1166	5	0	1	1166	3032347	3031182	0	2126	3031182	3032347	25144	151893	Full	-
17	CBCAS	LP6.00000578	99.633	1635	6	0	1	1635	3078680	3077046	0	2987	3077046	3078680	71008	105560	Full	-
18	CBCAS	LP6.00000578	99.572	1635	7	0	1	1635	3135256	3133622	0	2981	3133622	3135256	127584	48984	Full	-
	query	target	pident	length	mismatch	gaps	qstart	qend	tstart	tend	evalue	bitscore	start	end	down	up	type	direction
0	CBCAS	MBFBa.chr7	99.572	1635	7	0	1	1635	35967295	35968929	0	2981	35967295	35968929	83199	248636	Full	+
1	CBCAS	MBFBa.chr7	99.633	1635	6	0	1	1635	36023871	36025505	0	2987	36023871	36025505	139775	192060	Full	+
2	CBCAS	MBFBa.chr7	99.827	1157	2	0	1	1157	36070204	36071360	0	2126	36070204	36071360	186108	146205	Full	+
3	CBCAS	MBFBa.chr7	99.878	1635	2	0	1	1635	36143839	36145473	0	3009	36143839	36145473	259743	72092	Full	+
4	CBDAS	MBFBa.chr7	99.756	1636	3	1	1	1635	36207862	36209497	0	2998	36207862	36209497	323766	8068	Partial	+
5	CBCAS	MBFBa.chr7	99.878	1635	2	0	1	1635	36255710	36257344	0	3009	36255710	36257344	36221	163333	Full	+
6	CBCAS	MBFBa.chr7	99.939	1635	1	0	1	1635	36343590	36345224	0	3014	36343590	36345224	124101	75453	Full	+
7	THCAS	MBFBa.chr7	91.4	1628	135	5	1	1627	52212678	52214301	0	2226	52212678	52214301	155021	64893	Partial	+
8	CBDAS	MBFBa.chr7	91.376	1635	138	1	1	1635	52364014	52362383	0	2235	52362383	52364014	74074	416	Partial	-
9	CBDAS	MBFBa.chr7	92.427	1611	122	0	25	1635	52415440	52413830	0	2300	52413830	52415440	26030	433	Partial	-
10	CBDAS	MBFBa.chr7	89.744	1638	159	3	1	1635	52415458	52413827	0	2085	52413827	52415458	26027	415	Partial	-
11	CBDAS	MBFBa.chr7	92.171	1635	128	0	1	1635	52451843	52450209	0	2311	52450209	52451843	14003	417	Partial	-
12	CBDAS	MBFBa.chr7	91.865	1635	133	0	1	1635	52504380	52502746	0	2283	52502746	52504380	2025	416	Partial	-
13	THCAS	MBFBa.chr7	99.939	1635	1	0	1	1635	53196161	53194527	0	3014	53194527	53196161	86507	18207	Full	-
14	CBDAS	MBFBa.chr7	93.887	867	44	4	1	863	53317934	53318795	0	1299	53317934	53318795	8344	7194	Partial	+
15	CBDAS	MBFBa.chr7	94.065	775	45	1	858	1632	53328258	53329031	0	1175	53328258	53329031	18668	-3042	Partial	+
16	CBDAS	MBFBa.chr7	93.773	1638	93	4	1	1635	53408103	53409734	0	2451	53408103	53409734	14929	58390	Partial	+
17	CBDAS	MBFBa.chr7	94.814	1639	76	4	1	1635	53501309	53502942	0	2547	53501309	53502942	6795	46890	Partial	+
18	CBDAS	MBFBa.chr7	92.506	1628	111	4	9	1635	53766230	53767847	0	2320	53766230	53767847	8159	176643	Partial	+
	query	target	pident	length	mismatch	gaps	qstart	qend	tstart	tend	evalue	bitscore	start	end	down	up	type	direction
0	CBDAS	MBFBb.chr7	92.506	1628	111	4	9	1635	11030859	11029242	0	2320	11029242	11030859	15281	8159	Partial	-
1	CBDAS	MBFBb.chr7	94.814	1639	76	4	1	1635	11295780	11294147	0	2547	11294147	11295780	46890	6795	Partial	-
2	CBDAS	MBFBb.chr7	93.712	1638	94	4	1	1635	11388986	11387355	0	2446	11387355	11388986	58390	14929	Partial	-
3	CBDAS	MBFBb.chr7	87.71	773	90	5	865	1635	11468827	11468058	0	896	11468058	11468827	60124	18672	Partial	-
4	CBDAS	MBFBb.chr7	93.959	778	46	1	858	1635	11468831	11468055	0	1175	11468055	11468831	60121	18668	Partial	-
5	CBDAS	MBFBb.chr7	93.887	867	44	4	1	863	11479155	11478294	0	1299	11478294	11479155	70360	8344	Partial	-
6	THCAS	MBFBb.chr7	99.878	1635	2	0	1	1635	11600931	11602565	0	3009	11600931	11602565	35296	86507	Full	+
7	CBDAS	MBFBb.chr7	91.865	1635	133	0	1	1635	12303012	12304646	0	2283	12303012	12304646	416	25886	Partial	+
8	CBDAS	MBFBb.chr7	92.171	1635	128	0	1	1635	12355549	12357183	0	2311	12355549	12357183	417	22233	Partial	+
9	CBDAS	MBFBb.chr7	89.744	1638	159	3	1	1635	12391934	12393565	0	2085	12391934	12393565	415	26027	Partial	+
10	CBDAS	MBFBb.chr7	92.379	1614	123	0	22	1635	12391949	12393562	0	2300	12391949	12393562	430	26030	Partial	+
11	CBDAS	MBFBb.chr7	91.376	1635	138	1	1	1635	12443378	12445009	0	2235	12443378	12445009	416	170201	Partial	+
12	CBDAS	MBFBb.chr7	91.31	1634	137	5	1	1633	12594715	12593086	0	2226	12593086	12594715	150124	20495	Partial	-
	query	target	pident	length	mismatch	gaps	qstart	qend	tstart	tend	evalue	bitscore	start	end	down	up	type	direction
0	CBCAS	MBSVa.chr7	99.572	1635	7	0	1	1635	36952021	36953655	0	2981	36952021	36953655	83197	354438	Full	+
1	CBCAS	MBSVa.chr7	99.633	1635	6	0	1	1635	37008597	37010231	0	2987	37008597	37010231	139773	297862	Full	+
2	CBCAS	MBSVa.chr7	99.827	1157	2	0	1	1157	37054930	37056086	0	2126	37054930	37056086	186106	252007	Full	+
3	CBCAS	MBSVa.chr7	99.878	1635	2	0	1	1635	37128565	37130199	0	3009	37128565	37130199	259741	177894	Full	+
4	CBCAS	MBSVa.chr7	99.756	1636	3	1	1	1635	37192588	37194223	0	2998	37192588	37194223	323764	113870	Partial	+
5	CBCAS	MBSVa.chr7	99.878	1635	2	0	1	1635	37240436	37242070	0	3009	37240436	37242070	371612	66023	Full	+
6	CBCAS	MBSVa.chr7	99.939	1635	1	0	1	1635	37328316	37329950	0	3014	37328316	37329950	18299	75453	Full	+
7	THCAS	MBSVa.chr7	91.4	1628	135	5	1	1627	53980879	53982502	0	2226	53980879	53982502	155020	61280	Partial	+
8	CBDAS	MBSVa.chr7	91.376	1635	138	1	1	1635	54132215	54130584	0	2235	54130584	54132215	37603	416	Partial	-
9	CBDAS	MBSVa.chr7	92.427	1611	122	0	25	1635	54183639	54182029	0	2300	54182029	54183639	26030	433	Partial	-
10	CBDAS	MBSVa.chr7	89.744	1638	159	3	1	1635	54183657	54182026	0	2085	54182026	54183657	26027	415	Partial	-
11	CBDAS	MBSVa.chr7	92.171	1635	128	0	1	1635	54220042	54218408	0	2311	54218408	54220042	22233	417	Partial	-
12	CBDAS	MBSVa.chr7	91.865	1635	133	0	1	1635	54272577	54270943	0	2283	54270943	54272577	25886	416	Partial	-
13	THCAS	MBSVa.chr7	99.939	1635	1	0	1	1635	54964358	54962724	0	3014	54962724	54964358	87219	83722	Full	-
14	CBDAS	MBSVa.chr7	93.887	867	44	4	1	863	55086131	55086992	0	1299	55086131	55086992	8344	54314	Partial	+
15	CBDAS	MBSVa.chr7	94.065	775	45	1	858	1632	55096455	55097228	0	1175	55096455	55097228	18668	44078	Partial	+
16	CBDAS	MBSVa.chr7	93.773	1638	93	4	1	1635	55176300	55177931	0	2451	55176300	55177931	14929	58389	Partial	+
17	CBDAS	MBSVa.chr7	94.814	1639	76	4	1	1635	55269505	55271138	0	2547	55269505	55271138	6795	41003	Partial	+
18	CBDAS	MBSVa.chr7	92.506	1628	111	4	9	1635	55534427	55536044	0	2320	55534427	55536044	8159	19367	Partial	+
	query	target	pident	length	mismatch	gaps	qstart	qend	tstart	tend	evalue	bitscore	start	end	down	up	type	direction
0	CBDAS	MBSVb.chr7	100	1635	0	0	1	1635	12586404	12584770	0	3020	12584770	12586404	10280	32929	Full	-
1	CBDAS	MBSVb.chr7	91.927	1635	132	0	1	1635	13243564	13245198	0	2289	13243564	13245198	416	15962	Partial	+
2	CBDAS	MBSVb.chr7	92.538	1635	122	0	1	1635	13273959	13275593	0	2344	13273959	13275593	416	24288	Partial	+
3	CBDAS	MBSVb.chr7	92.416	1635	124	0	1	1635	13308303	13309937	0	2333	13308303	13309937	416	14537	Partial	+
4	CBDAS	MBSVb.chr7	92.416	1635	124	0	1	1635	13367552	13369186	0	2333	13367552	13369186	416	14061	Partial	+
5	CBDAS	MBSVb.chr7	91.327	980	83	2	657	1635	13399550	13400528	0	1338	13399550	13400528	3638	76405	Partial	+
6	CBDAS	MBSVb.chr7	91.298	1425	118	6	211	1633	13525954	13524534	0	1940	13524534	13525954	44122	166781	Partial	-
7	CBCAS	MBSVb.chr7	99.939	1635	1	0	1	1635	29705894	29704260	0	3014	29704260	29705894	7881	16267	Full	-
8	CBCAS	MBSVb.chr7	99.878	1635	2	0	1	1635	29793774	29792140	0	3009	29792140	29793774	68332	322106	Full	-
9	CBCAS	MBSVb.chr7	99.756	1636	3	1	1	1635	29841622	29839987	0	2998	29839987	29841622	116179	274258	Partial	-
10	CBCAS	MBSVb.chr7	99.878	1635	2	0	1	1635	29905645	29904011	0	3009	29904011	29905645	180203	210235	Full	-
11	CBCAS	MBSVb.chr7	99.571	1166	5	0	1	1166	29979280	29978115	0	2126	29978115	29979280	254307	136600	Full	-
12	CBCAS	MBSVb.chr7	99.633	1635	6	0	1	1635	30025613	30023979	0	2987	30023979	30025613	300171	90267	Full	-
13	CBCAS	MBSVb.chr7	99.572	1635	7	0	1	1635	30082189	30080555	0	2981	30080555	30082189	356747	33691	Full	-
	query	target	pident	length	mismatch	gaps	qstart	qend	tstart	tend	evalue	bitscore	start	end	down	up	type	direction
0	CBDAS	MM3v1a.chr7	99.511	1635	8	0	1	1635	11277782	11276148	0	2976	11276148	11277782	398022	65656	Full	-
1	CBDAS	MM3v1a.chr7	91.437	1635	140	0	1	1635	12047304	12048938	0	2244	12047304	12048938	418	35595	Partial	+
2	CBDAS	MM3v1a.chr7	91.988	1635	131	0	1	1635	12104017	12105651	0	2294	12104017	12105651	416	-5112	Partial	+
3	CBDAS	MM3v1a.chr7	91.467	668	57	0	1	668	12116127	12115460	0	918	12115460	12116127	11279	33740	Partial	-
	query	target	pident	length	mismatch	gaps	qstart	qend	tstart	tend	evalue	bitscore	start	end	down	up	type	direction
0	CBDAS	MM3v1b.chr7	99.511	1635	8	0	1	1635	31858747	31857113	0	2976	31857113	31858747	215594	65656	Full	-
1	CBDAS	MM3v1b.chr7	91.437	1635	140	0	1	1635	32620737	32622371	0	2244	32620737	32622371	418	25141	Partial	+
2	CBDAS	MM3v1b.chr7	91.988	1635	131	0	1	1635	32677450	32679084	0	2294	32677450	32679084	416	9944	Partial	+
3	CBDAS	MM3v1b.chr7	91.467	668	57	0	1	668	32689560	32688893	0	918	32688893	32689560	11859	-532	Partial	-
	query	target	pident	length	mismatch	gaps	qstart	qend	tstart	tend	evalue	bitscore	start	end	down	up	type	direction
0	CBDAS	MNDB.00004530	91.4	1628	135	5	1	1627	7976919	7978542	0	2226	7976919	7978542	73350	5721	Partial	+
1	CBDAS	MNDB.00004530	91.376	1635	138	1	1	1635	8128256	8126625	0	2235	8126625	8128256	20531	416	Partial	-
2	CBDAS	MNDB.00004530	92.489	1611	121	0	25	1635	8179684	8178074	0	2305	8178074	8179684	26030	433	Partial	-
3	CBDAS	MNDB.00004530	89.805	1638	158	3	1	1635	8179702	8178071	0	2091	8178071	8179702	26027	415	Partial	-
4	CBDAS	MNDB.00004530	92.232	1635	127	0	1	1635	8216088	8214454	0	2316	8214454	8216088	6756	417	Partial	-
5	CBDAS	MNDB.00004530	91.865	1635	133	0	1	1635	8268632	8266998	0	2283	8266998	8268632	25886	416	Partial	-
6	THCAS	MNDB.00004530	100	1635	0	0	1	1635	8960435	8958801	0	3020	8958801	8960435	86492	64387	Full	-
7	CBDAS	MNDB.00004530	93.887	867	44	4	1	863	9087640	9088501	0	1299	9087640	9088501	8345	-147	Partial	+
8	CBDAS	MNDB.00004530	94.065	775	45	1	858	1632	9097965	9098738	0	1175	9097965	9098738	5969	12219	Partial	+
9	CBDAS	MNDB.00004530	93.773	1638	93	4	1	1635	9159257	9160888	0	2451	9159257	9160888	14928	58389	Partial	+
10	CBDAS	MNDB.00004530	94.814	1639	76	4	1	1635	9252462	9254095	0	2547	9252462	9254095	3599	37480	Partial	+
11	CBDAS	MNDB.00004530	92.506	1628	111	4	9	1635	9517383	9519000	0	2320	9517383	9519000	8159	46046	Partial	+
12	THCAS	MNDB.00004766	99.939	1635	1	0	1	1635	259702	258068	0	3014	258068	259702	783	71488	Full	-
13	CBDAS	MNDB.00004766	93.887	867	44	4	1	863	381475	382336	0	1299	381475	382336	8344	70360	Partial	+
14	CBDAS	MNDB.00004766	94.065	775	45	1	858	1632	391799	392572	0	1175	391799	392572	18668	60124	Partial	+
15	CBDAS	MNDB.00004766	93.773	1638	93	4	1	1635	471644	473275	0	2451	471644	473275	15384	116100	Partial	+
16	CBCAS	MNDB.00001198	99.572	1635	7	0	1	1635	9111664	9113298	0	2981	9111664	9113298	-463	27012	Full	+
17	CBCAS	MNDB.00001198	99.633	1635	6	0	1	1635	9168240	9169874	0	2987	9168240	9169874	23911	49403	Full	+
18	CBCAS	MNDB.00001198	99.827	1157	2	0	1	1157	9214573	9215729	0	2126	9214573	9215729	70244	3548	Full	+
19	CBCAS	MNDB.00001198	99.878	1635	2	0	1	1635	9288208	9289842	0	3009	9288208	9289842	39345	1733	Full	+
20	CBDAS	MNDB.00001198	99.756	1636	3	1	1	1635	9352231	9353866	0	2998	9352231	9353866	46719	-3181	Partial	+
21	CBCAS	MNDB.00001198	99.878	1635	2	0	1	1635	9400079	9401713	0	3009	9400079	9401713	9670	96649	Full	+
22	CBCAS	MNDB.00001198	99.939	1635	1	0	1	1635	9487959	9489593	0	3014	9487959	9489593	97550	8769	Full	+
23	CBCAS	MNDB.00000933	99.755	1635	4	0	1	1635	8995770	8997404	0	2998	8995770	8997404	123461	27418	Full	+
24	CBCAS	MNDB.00000933	99.755	1635	4	0	1	1635	9044054	9045688	0	2998	9044054	9045688	15590	12107	Full	+
25	CBCAS	MNDB.00000933	99.939	1635	1	0	1	1635	9103891	9105525	0	3014	9103891	9105525	11895	5432	Full	+
26	CBDAS	MNDB.00000933	99.647	1134	3	1	1	1133	9179842	9180975	0	2071	9179842	9180975	35513	38302	Partial	+
27	CBCAS	MNDB.00000933	99.817	1635	3	0	1	1635	9231871	9233505	0	3003	9231871	9233505	5949	6296	Full	+
28	CBCAS	MNDB.00000933	99.939	1635	1	0	1	1635	9313217	9314851	0	3014	9313217	9314851	7705	35834	Full	+
29	CBCAS	MNDB.00000933	99.878	1635	2	0	1	1635	9395394	9397028	0	3009	9395394	9397028	4985	101334	Full	+
	query	target	pident	length	mismatch	gaps	qstart	qend	tstart	tend	evalue	bitscore	start	end	down	up	type	direction
0	CBDAS	NLv1a.chr7	92.506	1628	111	4	9	1635	11983083	11981466	0	2320	11981466	11983083	174152	8159	Partial	-
1	CBDAS	NLv1a.chr7	94.814	1639	76	4	1	1635	12248002	12246369	0	2547	12246369	12248002	46890	6795	Partial	-
2	CBDAS	NLv1a.chr7	93.712	1638	94	4	1	1635	12341209	12339578	0	2446	12339578	12341209	58391	14929	Partial	-
3	CBDAS	NLv1a.chr7	87.71	773	90	5	865	1635	12421050	12420281	0	896	12420281	12421050	60124	18672	Partial	-
4	CBDAS	NLv1a.chr7	93.959	778	46	1	858	1635	12421054	12420278	0	1175	12420278	12421054	60121	18668	Partial	-
5	CBDAS	NLv1a.chr7	93.887	867	44	4	1	863	12431378	12430517	0	1299	12430517	12431378	70360	8344	Partial	-
6	THCAS	NLv1a.chr7	99.939	1635	1	0	1	1635	12553151	12554785	0	3014	12553151	12554785	83722	86507	Full	+
7	CBDAS	NLv1a.chr7	91.865	1635	133	0	1	1635	13244937	13246571	0	2283	13244937	13246571	416	25886	Partial	+
8	CBDAS	NLv1a.chr7	92.171	1635	128	0	1	1635	13297474	13299108	0	2311	13297474	13299108	417	22233	Partial	+
9	CBDAS	NLv1a.chr7	89.744	1638	159	3	1	1635	13333859	13335490	0	2085	13333859	13335490	415	26027	Partial	+
10	CBDAS	NLv1a.chr7	92.379	1614	123	0	22	1635	13333874	13335487	0	2300	13333874	13335487	430	26030	Partial	+
11	CBDAS	NLv1a.chr7	91.376	1635	138	1	1	1635	13385302	13386933	0	2235	13385302	13386933	416	304727	Partial	+
12	THCAS	NLv1a.chr7	91.31	1634	137	5	1	1633	13536637	13535008	0	2226	13535008	13536637	150122	155023	Partial	-
	query	target	pident	length	mismatch	gaps	qstart	qend	tstart	tend	evalue	bitscore	start	end	down	up	type	direction
0	CBDAS	NLv1b.chr7	92.506	1628	111	4	9	1635	11919911	11918294	0	2320	11918294	11919911	50308	8194	Partial	-
1	CBDAS	NLv1b.chr7	95.022	1386	64	3	254	1635	12193334	12191950	0	2172	12191950	12193334	46887	7008	Partial	-
2	CBDAS	NLv1b.chr7	93.59	1638	96	4	1	1635	12293679	12292048	0	2435	12292048	12293679	1072	47574	Partial	-
3	CBDAS	NLv1b.chr7	87.581	773	90	6	865	1635	12357070	12356302	0	891	12356302	12357070	13964	25895	Partial	-
4	CBDAS	NLv1b.chr7	93.702	778	47	2	858	1635	12357074	12356299	0	1164	12356299	12357074	13961	25891	Partial	-
5	CBDAS	NLv1b.chr7	93.887	867	44	4	1	863	12374620	12373759	0	1299	12373759	12374620	31421	8345	Partial	-
6	THCAS	NLv1b.chr7	100	1635	0	0	1	1635	12494586	12496220	0	3020	12494586	12496220	90124	33519	Full	+
7	CBDAS	NLv1b.chr7	91.865	1635	133	0	1	1635	13209235	13210869	0	2283	13209235	13210869	416	25885	Partial	+
8	CBDAS	NLv1b.chr7	92.294	1635	126	0	1	1635	13262177	13263811	0	2322	13262177	13263811	417	22232	Partial	+
9	CBDAS	NLv1b.chr7	89.805	1638	158	3	1	1635	13303500	13305131	0	2091	13303500	13305131	415	26026	Partial	+
10	CBDAS	NLv1b.chr7	92.441	1614	122	0	22	1635	13303515	13305128	0	2305	13303515	13305128	430	26029	Partial	+
11	CBDAS	NLv1b.chr7	91.376	1635	138	1	1	1635	13354946	13356577	0	2235	13354946	13356577	416	6543	Partial	+
12	CBDAS	NLv1b.chr7	91.31	1634	137	5	1	1633	13499222	13497593	0	2226	13497593	13499222	131389	51238	Partial	-
	query	target	pident	length	mismatch	gaps	qstart	qend	tstart	tend	evalue	bitscore	start	end	down	up	type	direction
0	CBDAS	OFBa.chr7	92.232	1635	127	0	1	1635	35071663	35073297	0	2316	35071663	35073297	416	34732	Partial	+
1	CBDAS	OFBa.chr7	92.355	1635	125	0	1	1635	35140659	35142293	0	2327	35140659	35142293	417	16056	Partial	+
2	CBDAS	OFBa.chr7	92.599	1635	121	0	1	1635	35171681	35173315	0	2350	35171681	35173315	416	32396	Partial	+
3	CBDAS	OFBa.chr7	91.988	1635	130	1	1	1635	35254218	35255851	0	2292	35254218	35255851	416	159869	Partial	+
4	CBDAS	OFBa.chr7	91.228	1425	119	6	211	1633	35399796	35398376	0	1934	35398376	35399796	144574	15924	Partial	-
5	CBCAS	OFBa.chr7	99.939	1635	1	0	1	1635	53195250	53193616	0	3014	53193616	53195250	7702	183231	Full	-
6	CBCAS	OFBa.chr7	99.878	1635	2	0	1	1635	53283130	53281496	0	3009	53281496	53283130	95582	95351	Full	-
7	CBCAS	OFBa.chr7	99.878	1635	2	0	1	1635	53343858	53342224	0	3009	53342224	53343858	156310	34623	Full	-
8	CBDAS	OFBa.chr7	99.756	1636	3	1	1	1635	53391707	53390072	0	2998	53390072	53391707	10395	11419	Partial	-
9	CBCAS	OFBa.chr7	99.878	1635	2	0	1	1635	53455742	53454108	0	3009	53454108	53455742	26881	259739	Full	-
10	CBCAS	OFBa.chr7	99.571	1166	5	0	1	1166	53529377	53528212	0	2126	53528212	53529377	100985	186104	Full	-
11	CBCAS	OFBa.chr7	99.633	1635	6	0	1	1635	53575710	53574076	0	2987	53574076	53575710	146849	139771	Full	-
12	CBCAS	OFBa.chr7	99.572	1635	7	0	1	1635	53632286	53630652	0	2981	53630652	53632286	203425	83195	Full	-
13	CBDAS	OFBa.chr7	91.185	1418	121	4	211	1627	53916694	53918108	0	1923	53916694	53918108	15922	5364	Partial	+
14	CBDAS	OFBa.chr7	91.988	1635	130	1	1	1635	54063938	54062305	0	2292	54062305	54063938	43814	416	Partial	-
15	CBDAS	OFBa.chr7	92.599	1635	121	0	1	1635	54146471	54144837	0	2350	54144837	54146471	32397	416	Partial	-
16	CBDAS	OFBa.chr7	92.416	1635	124	0	1	1635	54177079	54175445	0	2333	54175445	54177079	15681	417	Partial	-
17	CBDAS	OFBa.chr7	92.294	1635	126	0	1	1635	54238173	54236539	0	2322	54236539	54238173	34732	416	Partial	-
18	THCAS	OFBa.chr7	99.939	1635	1	0	1	1635	54884525	54882891	0	3014	54882891	54884525	86386	61216	Full	-
19	CBDAS	OFBa.chr7	93.887	867	44	4	1	863	55009689	55010550	0	1299	55009689	55010550	8343	60664	Partial	+
20	CBDAS	OFBa.chr7	94.065	775	45	1	858	1632	55020013	55020786	0	1175	55020013	55020786	18667	50428	Partial	+
21	CBDAS	OFBa.chr7	93.773	1638	93	4	1	1635	55090140	55091771	0	2451	55090140	55091771	14906	58443	Partial	+
22	CBDAS	OFBa.chr7	94.753	1639	77	4	1	1635	55183388	55185021	0	2542	55183388	55185021	6797	46746	Partial	+
23	CBDAS	OFBa.chr7	92.506	1628	111	4	9	1635	55457686	55459303	0	2320	55457686	55459303	8158	176494	Partial	+
	query	target	pident	length	mismatch	gaps	qstart	qend	tstart	tend	evalue	bitscore	start	end	down	up	type	direction
0	CBDAS	OFBb.chr7	92.506	1628	111	4	9	1635	11279091	11277474	0	2320	11277474	11279091	174153	8159	Partial	-
1	CBDAS	OFBb.chr7	94.814	1639	76	4	1	1635	11544010	11542377	0	2547	11542377	11544010	46890	6795	Partial	-
2	CBDAS	OFBb.chr7	93.712	1638	94	4	1	1635	11637217	11635586	0	2446	11635586	11637217	58391	14929	Partial	-
3	CBDAS	OFBb.chr7	87.71	773	90	5	865	1635	11717059	11716290	0	896	11716290	11717059	60125	18672	Partial	-
4	CBDAS	OFBb.chr7	93.959	778	46	1	858	1635	11717063	11716287	0	1175	11716287	11717063	60122	18668	Partial	-
5	CBDAS	OFBb.chr7	93.887	867	44	4	1	863	11727387	11726526	0	1299	11726526	11727387	70361	8344	Partial	-
6	THCAS	OFBb.chr7	99.878	1635	2	0	1	1635	11849165	11850799	0	3009	11849165	11850799	83726	86508	Full	+
7	CBDAS	OFBb.chr7	91.865	1635	133	0	1	1635	12551254	12552888	0	2283	12551254	12552888	416	25886	Partial	+
8	CBDAS	OFBb.chr7	92.171	1635	128	0	1	1635	12603791	12605425	0	2311	12603791	12605425	417	10378	Partial	+
9	CBDAS	OFBb.chr7	89.744	1638	159	3	1	1635	12640176	12641807	0	2085	12640176	12641807	415	26027	Partial	+
10	CBDAS	OFBb.chr7	92.379	1614	123	0	22	1635	12640191	12641804	0	2300	12640191	12641804	430	26030	Partial	+
11	CBDAS	OFBb.chr7	91.376	1635	138	1	1	1635	12691619	12693250	0	2235	12691619	12693250	416	19319	Partial	+
12	THCAS	OFBb.chr7	91.31	1634	137	5	1	1633	12842954	12841325	0	2226	12841325	12842954	127668	155024	Partial	-
	query	target	pident	length	mismatch	gaps	qstart	qend	tstart	tend	evalue	bitscore	start	end	down	up	type	direction
0	CBDAS	OFP5.00000300	92.232	1635	127	0	1	1635	21916	20282	0	2316	20282	21916	9227	416	Partial	-
1	CBDAS	OFP5.00000300	91.185	1418	121	4	211	1627	186588	188002	0	1923	186588	188002	15920	146244	Partial	+
2	CBDAS	OFP5.00000300	91.988	1635	130	1	1	1635	333830	332197	0	2292	332197	333830	161529	416	Partial	-
3	CBDAS	OFP5.00000300	92.599	1635	121	0	1	1635	409069	407435	0	2350	407435	409069	32397	416	Partial	-
4	CBDAS	OFP5.00000300	92.416	1635	124	0	1	1635	439673	438039	0	2333	438039	439673	15681	417	Partial	-
5	CBDAS	OFP5.00000300	92.294	1635	126	0	1	1635	500769	499135	0	2322	499135	500769	34732	416	Partial	-
6	THCAS	OFP5.00000300	99.939	1635	1	0	1	1635	1147000	1145366	0	3014	1145366	1147000	86383	115634	Full	-
7	CBDAS	OFP5.00000300	93.887	867	44	4	1	863	1272164	1273025	0	1299	1272164	1273025	8343	51182	Partial	+
8	CBDAS	OFP5.00000300	94.065	775	45	1	858	1632	1282487	1283260	0	1175	1282487	1283260	18666	40947	Partial	+
9	CBDAS	OFP5.00000300	93.773	1638	93	4	1	1635	1343133	1344764	0	2451	1343133	1344764	14906	58444	Partial	+
10	CBDAS	OFP5.00000300	94.753	1639	77	4	1	1635	1436382	1438015	0	2542	1436382	1438015	6797	46744	Partial	+
11	CBDAS	OFP5.00000300	92.506	1628	111	4	9	1635	1685269	1686886	0	2320	1685269	1686886	8158	176496	Partial	+
12	CBDAS	OFP5.00000071	92.232	1635	127	0	1	1635	6571661	6573295	0	2316	6571661	6573295	416	34733	Partial	+
13	CBDAS	OFP5.00000071	92.355	1635	125	0	1	1635	6640656	6642290	0	2327	6640656	6642290	417	16056	Partial	+
14	CBDAS	OFP5.00000071	92.599	1635	121	0	1	1635	6671663	6673297	0	2350	6671663	6673297	416	32396	Partial	+
15	CBDAS	OFP5.00000071	91.988	1635	130	1	1	1635	6754198	6755831	0	2292	6754198	6755831	416	159865	Partial	+
16	CBDAS	OFP5.00000071	91.228	1425	119	6	211	1633	6899774	6898354	0	1934	6898354	6899774	144572	15922	Partial	-
17	CBCAS	OFP5.00001347	99.939	1635	1	0	1	1635	1048689	1047055	0	3014	1047055	1048689	211281	4072	Full	-
18	CBCAS	OFP5.00001347	99.878	1635	2	0	1	1635	1136569	1134935	0	3009	1134935	1136569	75952	126065	Full	-
19	CBCAS	OFP5.00001347	99.878	1635	2	0	1	1635	1197297	1195663	0	3009	1195663	1197297	136680	65337	Full	-
20	CBDAS	OFP5.00001347	99.756	1636	3	1	1	1635	1245146	1243511	0	2998	1243511	1245146	184528	17488	Partial	-
21	CBCAS	OFP5.00001347	99.878	1635	2	0	1	1635	1309181	1307547	0	3009	1307547	1309181	43726	15026	Full	-
22	CBCAS	OFP5.00001347	99.571	1166	5	0	1	1166	1382816	1381651	0	2126	1381651	1382816	53424	20392	Full	-
23	CBCAS	OFP5.00001347	99.633	1635	6	0	1	1635	1429149	1427515	0	2987	1427515	1429149	17662	-1640	Full	-
24	CBCAS	OFP5.00001347	99.572	1635	7	0	1	1635	1485727	1484093	0	2981	1484093	1485727	-5193	180522	Full	-
	query	target	pident	length	mismatch	gaps	qstart	qend	tstart	tend	evalue	bitscore	start	end	down	up	type	direction
0	CBDAS	P20.00000174	92.506	1628	111	4	9	1635	12939844	12938227	0	2320	12938227	12939844	174152	8159	Partial	-
1	CBDAS	P20.00000174	94.814	1639	76	4	1	1635	13208801	13207168	0	2547	13207168	13208801	46890	6795	Partial	-
2	CBDAS	P20.00000174	93.712	1638	94	4	1	1635	13302008	13300377	0	2446	13300377	13302008	58391	14929	Partial	-
3	CBDAS	P20.00000174	87.71	773	90	5	865	1635	13381849	13381080	0	896	13381080	13381849	60124	18672	Partial	-
4	CBDAS	P20.00000174	93.959	778	46	1	858	1635	13381853	13381077	0	1175	13381077	13381853	60121	18668	Partial	-
5	CBDAS	P20.00000174	93.887	867	44	4	1	863	13392177	13391316	0	1299	13391316	13392177	70360	8344	Partial	-
6	THCAS	P20.00000174	99.878	1635	2	0	1	1635	13513953	13515587	0	3009	13513953	13515587	83725	86507	Full	+
7	CBDAS	P20.00000174	91.865	1635	133	0	1	1635	14216040	14217674	0	2283	14216040	14217674	416	25886	Partial	+
8	CBDAS	P20.00000174	92.171	1635	128	0	1	1635	14268577	14270211	0	2311	14268577	14270211	417	22233	Partial	+
9	CBDAS	P20.00000174	89.744	1638	159	3	1	1635	14304962	14306593	0	2085	14304962	14306593	415	26027	Partial	+
10	CBDAS	P20.00000174	92.379	1614	123	0	22	1635	14304977	14306590	0	2300	14304977	14306590	430	26030	Partial	+
11	CBDAS	P20.00000174	91.376	1635	138	1	1	1635	14356405	14358036	0	2235	14356405	14358036	416	304729	Partial	+
12	THCAS	P20.00000174	91.31	1634	137	5	1	1633	14507741	14506112	0	2226	14506112	14507741	150123	155024	Partial	-
13	CBCAS	P20.00001589	99.572	1635	7	0	1	1635	3227937	3229571	0	2981	3227937	3229571	83195	451749	Full	+
14	CBCAS	P20.00001589	99.633	1635	6	0	1	1635	3284514	3286148	0	2987	3284514	3286148	139772	395172	Full	+
15	CBCAS	P20.00001589	99.827	1157	2	0	1	1157	3330847	3332003	0	2126	3330847	3332003	186105	349317	Full	+
16	CBCAS	P20.00001589	99.878	1635	2	0	1	1635	3404482	3406116	0	3009	3404482	3406116	259740	275204	Full	+
17	CBCAS	P20.00001589	99.756	1636	3	1	1	1635	3468505	3470140	0	2998	3468505	3470140	323763	211180	Partial	+
18	CBCAS	P20.00001589	99.878	1635	2	0	1	1635	3516353	3517987	0	3009	3516353	3517987	371611	163333	Full	+
19	CBCAS	P20.00001589	99.939	1635	1	0	1	1635	3604233	3605867	0	3014	3604233	3605867	459491	75453	Full	+
	query	target	pident	length	mismatch	gaps	qstart	qend	tstart	tend	evalue	bitscore	start	end	down	up	type	direction
0	CBDAS	P22.00000968	92.506	1628	111	4	9	1635	1443606	1441989	0	2320	1441989	1443606	174152	8159	Partial	-
1	CBDAS	P22.00000968	94.814	1639	76	4	1	1635	1708525	1706892	0	2547	1706892	1708525	46890	6795	Partial	-
2	CBDAS	P22.00000968	93.712	1638	94	4	1	1635	1801732	1800101	0	2446	1800101	1801732	58391	14929	Partial	-
3	CBDAS	P22.00000968	87.71	773	90	5	865	1635	1881573	1880804	0	896	1880804	1881573	5580	18672	Partial	-
4	CBDAS	P22.00000968	93.959	778	46	1	858	1635	1881577	1880801	0	1175	1880801	1881577	5577	18668	Partial	-
5	CBDAS	P22.00000968	93.887	867	44	4	1	863	1891901	1891040	0	1299	1891040	1891901	15816	8344	Partial	-
6	THCAS	P22.00000968	99.878	1635	2	0	1	1635	2013677	2015311	0	3009	2013677	2015311	83725	86508	Full	+
7	CBDAS	P22.00000968	91.865	1635	133	0	1	1635	2715764	2717398	0	2283	2715764	2717398	416	25886	Partial	+
8	CBDAS	P22.00000968	92.171	1635	128	0	1	1635	2768301	2769935	0	2311	2768301	2769935	417	22233	Partial	+
9	CBDAS	P22.00000968	89.744	1638	159	3	1	1635	2804686	2806317	0	2085	2804686	2806317	415	26027	Partial	+
10	CBDAS	P22.00000968	92.379	1614	123	0	22	1635	2804701	2806314	0	2300	2804701	2806314	430	26030	Partial	+
11	CBDAS	P22.00000968	91.376	1635	138	1	1	1635	2856129	2857760	0	2235	2856129	2857760	416	153415	Partial	+
12	CBDAS	P22.00000968	91.31	1634	137	5	1	1633	3007465	3005836	0	2226	3005836	3007465	150123	3710	Partial	-
13	CBCAS	P22.00003930	99.939	1635	1	0	1	1635	400830	399196	0	3014	399196	400830	79162	2781	Full	-
14	CBCAS	P22.00003930	99.878	1635	2	0	1	1635	488711	487077	0	3009	487077	488711	17679	409183	Full	-
15	CBCAS	P22.00003930	99.756	1636	3	1	1	1635	536559	534924	0	2998	534924	536559	65526	361335	Partial	-
16	CBCAS	P22.00003930	99.878	1635	2	0	1	1635	600582	598948	0	3009	598948	600582	129550	297312	Full	-
17	CBCAS	P22.00003930	99.571	1166	5	0	1	1166	674216	673051	0	2126	673051	674216	203653	223678	Full	-
18	CBCAS	P22.00003930	99.633	1635	6	0	1	1635	720549	718915	0	2987	718915	720549	249517	177345	Full	-
19	CBCAS	P22.00003930	99.572	1635	7	0	1	1635	777126	775492	0	2981	775492	777126	306094	120768	Full	-
	query	target	pident	length	mismatch	gaps	qstart	qend	tstart	tend	evalue	bitscore	start	end	down	up	type	direction
0	CBDAS	PBBK.05126	92.355	1635	125	0	1	1635	15361	16995	0	2327	15361	16995	415	-1514	Partial	+
1	CBDAS	PBBK.05126	91.624	967	73	8	1	963	42591	43553	0	1330	42591	43553	414	3775	Partial	+
2	CBDAS	PBBK.05126	92.871	505	36	0	1131	1635	43556	44060	0	734	43556	44060	1379	3268	Partial	+
3	CBDAS	PBBK.05126	88.024	501	60	0	1135	1635	43563	44063	1.36e-167	593	43563	44063	1386	3265	Partial	+
	query	target	pident	length	mismatch	gaps	qstart	qend	tstart	tend	evalue	bitscore	start	end	down	up	type	direction
0	CBDAS	PK.0300	92.11	1635	128	1	1	1635	570	2203	0	2303	570	2203		22187	Partial	+
1	CBDAS	PK.0300	89.628	1639	152	10	1	1635	36865	38489	0	2069	36865	38489	415	25951	Partial	+
2	CBDAS	PK.0300	92.198	1615	117	7	22	1635	36880	38486	0	2276	36880	38486	430	25954	Partial	+
3	CBDAS	PK.0300	91.376	1635	138	1	1	1635	88111	89742	0	2235	88111	89742	416	225231	Partial	+
4	THCAS	PK.chr7	99.939	1635	1	0	1	1635	28651687	28650053	0	3014	28650053	28651687	15438	80489	Full	-
5	CBDAS	PK.chr7	93.887	867	44	4	1	863	28773351	28774212	0	1299	28773351	28774212	5637	3491	Partial	+
6	CBDAS	PK.chr7	94.065	775	45	1	858	1632	28783636	28784409	0	1175	28783636	28784409	3856	-6706	Partial	+
7	CBCAS	PK.chr7	99.694	1636	2	3	1	1635	46551515	46549882	0	2990	46549882	46551515	99428	140247	Partial	-
	query	target	pident	length	mismatch	gaps	qstart	qend	tstart	tend	evalue	bitscore	start	end	down	up	type	direction
0	CBDAS	PPFBa.chr7	92.506	1628	111	4	9	1635	11379070	11377453	0	2320	11377453	11379070	174152	8159	Partial	-
1	CBDAS	PPFBa.chr7	94.814	1639	76	4	1	1635	11643990	11642357	0	2547	11642357	11643990	46891	6795	Partial	-
2	CBDAS	PPFBa.chr7	93.712	1638	94	4	1	1635	11737197	11735566	0	2446	11735566	11737197	58391	14929	Partial	-
3	CBDAS	PPFBa.chr7	87.71	773	90	5	865	1635	11817038	11816269	0	896	11816269	11817038	60124	18672	Partial	-
4	CBDAS	PPFBa.chr7	93.959	778	46	1	858	1635	11817042	11816266	0	1175	11816266	11817042	60121	18668	Partial	-
5	CBDAS	PPFBa.chr7	93.887	867	44	4	1	863	11827366	11826505	0	1299	11826505	11827366	70360	8344	Partial	-
6	THCAS	PPFBa.chr7	99.939	1635	1	0	1	1635	11949139	11950773	0	3014	11949139	11950773	81717	86507	Full	+
7	CBDAS	PPFBa.chr7	91.865	1635	133	0	1	1635	12640923	12642557	0	2283	12640923	12642557	416	25886	Partial	+
8	CBDAS	PPFBa.chr7	92.171	1635	128	0	1	1635	12693460	12695094	0	2311	12693460	12695094	417	22233	Partial	+
9	CBDAS	PPFBa.chr7	89.744	1638	159	3	1	1635	12729845	12731476	0	2085	12729845	12731476	415	26027	Partial	+
10	CBDAS	PPFBa.chr7	92.379	1614	123	0	22	1635	12729860	12731473	0	2300	12729860	12731473	430	26030	Partial	+
11	CBDAS	PPFBa.chr7	91.376	1635	138	1	1	1635	12781288	12782919	0	2235	12781288	12782919	416	6349	Partial	+
12	THCAS	PPFBa.chr7	91.31	1634	137	5	1	1633	12932623	12930994	0	2226	12930994	12932623	140554	155023	Partial	-
	query	target	pident	length	mismatch	gaps	qstart	qend	tstart	tend	evalue	bitscore	start	end	down	up	type	direction
0	CBDAS	PPFBb.chr7	92.506	1628	111	4	9	1635	11457956	11456339	0	2320	11456339	11457956	174152	8159	Partial	-
1	CBDAS	PPFBb.chr7	94.814	1639	76	4	1	1635	11722876	11721243	0	2547	11721243	11722876	46891	6795	Partial	-
2	CBDAS	PPFBb.chr7	93.712	1638	94	4	1	1635	11816083	11814452	0	2446	11814452	11816083	58391	14929	Partial	-
3	CBDAS	PPFBb.chr7	87.71	773	90	5	865	1635	11895924	11895155	0	896	11895155	11895924	46484	18672	Partial	-
4	CBDAS	PPFBb.chr7	93.959	778	46	1	858	1635	11895928	11895152	0	1175	11895152	11895928	46481	18668	Partial	-
5	CBDAS	PPFBb.chr7	93.887	867	44	4	1	863	11906252	11905391	0	1299	11905391	11906252	56720	8344	Partial	-
6	THCAS	PPFBb.chr7	99.878	1635	2	0	1	1635	12028028	12029662	0	3009	12028028	12029662	83725	86507	Full	+
7	CBDAS	PPFBb.chr7	91.865	1635	133	0	1	1635	12730115	12731749	0	2283	12730115	12731749	416	25886	Partial	+
8	CBDAS	PPFBb.chr7	92.171	1635	128	0	1	1635	12782652	12784286	0	2311	12782652	12784286	417	22233	Partial	+
9	CBDAS	PPFBb.chr7	89.744	1638	159	3	1	1635	12819037	12820668	0	2085	12819037	12820668	415	26027	Partial	+
10	CBDAS	PPFBb.chr7	92.379	1614	123	0	22	1635	12819052	12820665	0	2300	12819052	12820665	430	26030	Partial	+
11	CBDAS	PPFBb.chr7	91.376	1635	138	1	1	1635	12870480	12872111	0	2235	12870480	12872111	416	220753	Partial	+
12	THCAS	PPFBb.chr7	91.31	1634	137	5	1	1633	13021815	13020186	0	2226	13020186	13021815	150122	71049	Partial	-
	query	target	pident	length	mismatch	gaps	qstart	qend	tstart	tend	evalue	bitscore	start	end	down	up	type	direction
0	CBDAS	PTK32.00003409	92.506	1628	111	4	9	1635	4661532	4659915	0	2320	4659915	4661532	176643	8159	Partial	-
1	CBDAS	PTK32.00003409	94.814	1639	76	4	1	1635	4926454	4924821	0	2547	4924821	4926454	46890	6795	Partial	-
2	CBDAS	PTK32.00003409	93.773	1638	93	4	1	1635	5019659	5018028	0	2451	5018028	5019659	58389	14929	Partial	-
3	CBDAS	PTK32.00003409	87.71	773	90	5	865	1635	5099500	5098731	0	896	5098731	5099500	60124	18672	Partial	-
4	CBDAS	PTK32.00003409	93.959	778	46	1	858	1635	5099504	5098728	0	1175	5098728	5099504	60121	18668	Partial	-
5	CBDAS	PTK32.00003409	93.887	867	44	4	1	863	5109828	5108967	0	1299	5108967	5109828	70360	8344	Partial	-
6	THCAS	PTK32.00003409	99.939	1635	1	0	1	1635	5231601	5233235	0	3014	5231601	5233235	9202	86508	Full	+
7	CBDAS	PTK32.00003409	91.865	1635	133	0	1	1635	5923382	5925016	0	2283	5923382	5925016	416	25886	Partial	+
8	CBDAS	PTK32.00003409	92.171	1635	128	0	1	1635	5975917	5977551	0	2311	5975917	5977551	417	22233	Partial	+
9	CBDAS	PTK32.00003409	89.744	1638	159	3	1	1635	6012302	6013933	0	2085	6012302	6013933	415	26027	Partial	+
10	CBDAS	PTK32.00003409	92.379	1614	123	0	22	1635	6012317	6013930	0	2300	6012317	6013930	430	26030	Partial	+
11	CBDAS	PTK32.00003409	91.376	1635	138	1	1	1635	6063744	6065375	0	2235	6063744	6065375	416	35851	Partial	+
12	CBDAS	PTK32.00003409	91.31	1634	137	5	1	1633	6215080	6213451	0	2226	6213451	6215080	41536	155020	Partial	-
13	CBCAS	PTK32.00001196	99.878	1635	2	0	1	1635	9587329	9585695	0	3009	9585695	9587329	56309	34757	Full	-
14	CBCAS	PTK32.00001196	99.817	1635	3	0	1	1635	9638438	9636804	0	3003	9636804	9638438	10350	49758	Full	-
15	CBCAS	PTK32.00001196	99.817	1635	3	0	1	1635	9706011	9704377	0	3003	9704377	9706011	7079	39997	Full	-
16	CBDAS	PTK32.00001196	99.572	1636	6	1	1	1635	9744037	9742402	0	2981	9742402	9744037	45104	1971	Partial	-
17	CBCAS	PTK32.00001196	99.633	1635	6	0	1	1635	9807737	9806103	0	2987	9806103	9807737	4998	7850	Full	-
18	CBDAS	PTK32.00001196	99.144	1635	2	1	1	1635	9897550	9895928	0	2931	9895928	9897550	22149	35624	Partial	-
19	CBCAS	PTK32.00001196	99.694	1635	5	0	1	1635	9955802	9954168	0	2992	9954168	9955802	19838	81895	Full	-
20	CBCAS	PTK32.00001196	99.847	654	1	0	982	1635	10010867	10010214	0	1203	10010214	10010867	75884	26830	Full	-
	query	target	pident	length	mismatch	gaps	qstart	qend	tstart	tend	evalue	bitscore	start	end	down	up	type	direction
0	CBDAS	PURD.00006129	91.4	1628	135	5	1	1627	2586163	2587786	0	2226	2586163	2587786	90251	11935	Partial	+
1	CBDAS	PURD.00006129	91.376	1635	138	1	1	1635	2737425	2735794	0	2235	2735794	2737425	129851	416	Partial	-
2	CBDAS	PURD.00006129	92.489	1611	121	0	25	1635	2799055	2797445	0	2305	2797445	2799055	36233	434	Partial	-
3	CBDAS	PURD.00006129	89.805	1638	158	3	1	1635	2799073	2797442	0	2091	2797442	2799073	36230	416	Partial	-
4	CBDAS	PURD.00006129	92.232	1635	127	0	1	1635	2840420	2838786	0	2316	2838786	2840420	22232	417	Partial	-
5	CBDAS	PURD.00006129	91.865	1635	133	0	1	1635	2893336	2891702	0	2283	2891702	2893336	11440	416	Partial	-
6	THCAS	PURD.00006129	100	1635	0	0	1	1635	3605358	3603724	0	3020	3603724	3605358	14129	47062	Full	-
7	CBDAS	PURD.00006129	93.772	867	45	4	1	863	3725333	3726194	0	1293	3725333	3726194	8344	-1906	Partial	+
8	CBDAS	PURD.00006129	93.935	775	46	1	858	1632	3735635	3736408	0	1170	3735635	3736408	4729	49342	Partial	+
9	CBDAS	PURD.00006129	93.651	1638	94	5	1	1635	3804673	3806303	0	2440	3804673	3806303	14913	100598	Partial	+
10	CBDAS	PURD.00006129	94.814	1639	76	4	1	1635	3948864	3950497	0	2547	3948864	3950497	8567	46898	Partial	+
11	CBDAS	PURD.00006129	92.383	1628	113	4	9	1635	4219403	4221020	0	2309	4219403	4221020	9435	7570	Partial	+
12	CBDAS	PURD.00002338	91.332	1419	117	6	211	1627	1233716	1235130	0	1934	1233716	1235130	15922	2311	Partial	+
13	CBDAS	PURD.00002338	91.988	1635	130	1	1	1635	1379288	1377655	0	2292	1377655	1379288	15841	416	Partial	-
14	CBDAS	PURD.00002338	92.599	1635	121	0	1	1635	1461823	1460189	0	2350	1460189	1461823	32396	416	Partial	-
15	CBDAS	PURD.00002338	92.355	1635	125	0	1	1635	1492827	1491193	0	2327	1491193	1492827	16055	417	Partial	-
16	CBDAS	PURD.00002338	92.232	1635	127	0	1	1635	1561842	1560208	0	2316	1560208	1561842	34731	416	Partial	-
17	CBDAS	PURD.00002338	91.185	1418	121	4	211	1627	1726494	1727908	0	1923	1726494	1727908	15920	80838	Partial	+
18	CBDAS	PURD.00002338	91.988	1635	130	1	1	1635	1873737	1872104	0	2292	1872104	1873737	7102	416	Partial	-
19	CBDAS	PURD.00002338	92.538	1635	122	0	1	1635	1956176	1954542	0	2344	1954542	1956176	19229	416	Partial	-
20	CBDAS	PURD.00002338	92.416	1635	124	0	1	1635	1986774	1985140	0	2333	1985140	1986774	15681	417	Partial	-
21	CBDAS	PURD.00002338	92.294	1635	126	0	1	1635	2047882	2046248	0	2322	2046248	2047882	34732	416	Partial	-
22	THCAS	PURD.00002338	99.939	1635	1	0	1	1635	2693958	2692324	0	3014	2692324	2693958	86381	43883	Full	-
23	CBDAS	PURD.00002338	93.887	867	44	4	1	863	2819102	2819963	0	1299	2819102	2819963	2548	20874	Partial	+
24	CBDAS	PURD.00002338	94.065	775	45	1	858	1632	2829425	2830198	0	1175	2829425	2830198	12871	10639	Partial	+
25	CBDAS	PURD.00002338	93.773	1638	93	4	1	1635	2890071	2891702	0	2451	2890071	2891702	9809	2050	Partial	+
26	CBDAS	PURD.00002338	94.753	1639	77	4	1	1635	2983149	2984782	0	2542	2983149	2984782	6797	2390	Partial	+
27	CBDAS	PURD.00002338	92.506	1628	111	4	9	1635	3232037	3233654	0	2320	3232037	3233654	6018	6850	Partial	+
28	CBCAS	PURD.00001389	99.939	1635	1	0	1	1635	9558495	9556861	0	3014	9556861	9558495	75449	520235	Full	-
29	CBCAS	PURD.00001389	99.878	1635	2	0	1	1635	9646375	9644741	0	3009	9644741	9646375	163329	432355	Full	-
30	CBCAS	PURD.00001389	99.878	1635	2	0	1	1635	9707103	9705469	0	3009	9705469	9707103	224057	371627	Full	-
31	CBCAS	PURD.00001389	99.756	1636	3	1	1	1635	9754952	9753317	0	2998	9753317	9754952	271905	323778	Partial	-
32	CBCAS	PURD.00001389	99.878	1635	2	0	1	1635	9818987	9817353	0	3009	9817353	9818987	335941	259743	Full	-
33	CBCAS	PURD.00001389	99.571	1166	5	0	1	1166	9892622	9891457	0	2126	9891457	9892622	410045	186108	Full	-
34	CBCAS	PURD.00001389	99.633	1635	6	0	1	1635	9938955	9937321	0	2987	9937321	9938955	455909	139775	Full	-
35	CBCAS	PURD.00001389	99.572	1635	7	0	1	1635	9995533	9993899	0	2981	9993899	9995533	512487	83197	Full	-
	query	target	pident	length	mismatch	gaps	qstart	qend	tstart	tend	evalue	bitscore	start	end	down	up	type	direction
0	CBDAS	PURP.00002376	91.4	1628	135	5	1	1627	1658398	1660021	0	2226	1658398	1660021	74872	32498	Partial	+
1	CBDAS	PURP.00002376	91.376	1635	138	1	1	1635	1809733	1808102	0	2235	1808102	1809733	13635	416	Partial	-
2	CBDAS	PURP.00002376	92.427	1611	122	0	25	1635	1861159	1859549	0	2300	1859549	1861159	26030	433	Partial	-
3	CBDAS	PURP.00002376	89.744	1638	159	3	1	1635	1861177	1859546	0	2085	1859546	1861177	26027	415	Partial	-
4	CBDAS	PURP.00002376	92.171	1635	128	0	1	1635	1897562	1895928	0	2311	1895928	1897562	22233	417	Partial	-
5	CBDAS	PURP.00002376	91.865	1635	133	0	1	1635	1950099	1948465	0	2283	1948465	1950099	25886	416	Partial	-
6	THCAS	PURP.00002376	99.939	1635	1	0	1	1635	2641882	2640248	0	3014	2640248	2641882	86507	27944	Full	-
7	CBDAS	PURP.00002376	93.887	867	44	4	1	863	2763655	2764516	0	1299	2763655	2764516	8344	70360	Partial	+
8	CBDAS	PURP.00002376	94.065	775	45	1	858	1632	2773979	2774752	0	1175	2773979	2774752	18668	60124	Partial	+
9	CBDAS	PURP.00002376	93.712	1638	94	4	1	1635	2853824	2855455	0	2446	2853824	2855455	14929	5973	Partial	+
10	CBDAS	PURP.00002376	94.814	1639	76	4	1	1635	2947029	2948662	0	2547	2947029	2948662	6795	-2442	Partial	+
11	CBDAS	PURP.00002376	92.506	1628	111	4	9	1635	3211948	3213565	0	2320	3211948	3213565	8159	155868	Partial	+
12	CBDAS	PURP.00003775	91.4	1628	135	5	1	1627	223364	224987	0	2226	223364	224987	30923	57475	Partial	+
13	CBDAS	PURP.00003775	91.376	1635	138	1	1	1635	367640	366009	0	2235	366009	367640	82074	416	Partial	-
14	CBDAS	PURP.00003775	92.489	1611	121	0	25	1635	419068	417458	0	2305	417458	419068	26029	433	Partial	-
15	CBDAS	PURP.00003775	89.805	1638	158	3	1	1635	419086	417455	0	2091	417455	419086	26026	415	Partial	-
16	CBDAS	PURP.00003775	92.294	1635	126	0	1	1635	460409	458775	0	2322	458775	460409	22232	417	Partial	-
17	CBDAS	PURP.00003775	91.865	1635	133	0	1	1635	513350	511716	0	2283	511716	513350	25884	416	Partial	-
18	THCAS	PURP.00003775	100	1635	0	0	1	1635	1227998	1226364	0	3020	1226364	1227998	92695	90124	Full	-
19	CBDAS	PURP.00003775	93.887	867	44	4	1	863	1347964	1348825	0	1299	1347964	1348825	8345	59838	Partial	+
20	CBDAS	PURP.00003775	93.806	775	46	2	858	1632	1365510	1366282	0	1164	1365510	1366282	25891	42381	Partial	+
21	CBDAS	PURP.00003775	93.59	1638	96	4	1	1635	1428905	1430536	0	2435	1428905	1430536	1355	58300	Partial	+
22	CBDAS	PURP.00003775	95.022	1386	64	3	254	1635	1529241	1530625	0	2172	1529241	1530625	7009	46887	Partial	+
23	CBDAS	PURP.00003775	92.506	1628	111	4	9	1635	1802661	1804278	0	2320	1802661	1804278	8194	5871	Partial	+
	query	target	pident	length	mismatch	gaps	qstart	qend	tstart	tend	evalue	bitscore	start	end	down	up	type	direction
0	CBDAS	S8H2LR.000174F	100	1635	0	0	1	1635	334249	332615	0	3020	332615	334249	23	32932	Full	-
1	CBDAS	S8H2LR.000174F	91.927	1635	132	0	1	1635	991427	993061	0	2289	991427	993061	416	7163	Partial	+
2	CBDAS	S8H2LR.000174F	92.538	1635	122	0	1	1635	1021823	1023457	0	2344	1021823	1023457	416	24288	Partial	+
3	CBDAS	S8H2LR.000174F	92.416	1635	124	0	1	1635	1056167	1057801	0	2333	1056167	1057801	416	14539	Partial	+
4	CBDAS	S8H2LR.000174F	92.416	1635	124	0	1	1635	1115419	1117053	0	2333	1115419	1117053	416	14061	Partial	+
5	CBDAS	S8H2LR.000174F	91.327	980	83	2	657	1635	1147418	1148396	0	1338	1147418	1148396	3638	14522	Partial	+
6	CBDAS	S8H2LR.000174F	91.298	1425	118	6	211	1633	1273822	1272402	0	1940	1272402	1273822	59393	85532	Partial	-
7	THCAS	S8H2LR.000012F	91.4	1628	135	5	1	1627	1688990	1690613	0	2226	1688990	1690613	74606	79768	Partial	+
8	CBDAS	S8H2LR.000012F	91.376	1635	138	1	1	1635	1840254	1838623	0	2235	1838623	1840254	63308	416	Partial	-
9	CBDAS	S8H2LR.000012F	92.489	1611	121	0	25	1635	1891684	1890074	0	2305	1890074	1891684	26030	434	Partial	-
10	CBDAS	S8H2LR.000012F	89.805	1638	158	3	1	1635	1891702	1890071	0	2091	1890071	1891702	26027	416	Partial	-
11	CBDAS	S8H2LR.000012F	92.232	1635	127	0	1	1635	1933049	1931415	0	2316	1931415	1933049	15130	417	Partial	-
12	CBDAS	S8H2LR.000012F	91.865	1635	133	0	1	1635	1985960	1984326	0	2283	1984326	1985960	25884	416	Partial	-
13	THCAS	S8H2LR.000012F	100	1635	0	0	1	1635	2697954	2696320	0	3020	2696320	2697954	39591	110443	Full	-
14	CBDAS	S8H2LR.000012F	93.772	867	45	4	1	863	2817929	2818790	0	1293	2817929	2818790	8344	210	Partial	+
15	CBDAS	S8H2LR.000012F	93.935	775	46	1	858	1632	2828231	2829004	0	1170	2828231	2829004	3035	52316	Partial	+
16	CBDAS	S8H2LR.000012F	93.712	1638	94	4	1	1635	2900243	2901874	0	2446	2900243	2901874	14913	100599	Partial	+
17	CBDAS	S8H2LR.000012F	94.814	1639	76	4	1	1635	3044436	3046069	0	2547	3044436	3046069	8567	28163	Partial	+
18	CBDAS	S8H2LR.000012F	92.322	1628	114	4	9	1635	3315077	3316694	0	2303	3315077	3316694	8158	2812	Partial	+
19	CBCAS	S8H2LR.000379F	99.572	1635	7	0	1	1635	124889	126523	0	2981	124889	126523	47340	125706	Full	+
20	CBCAS	S8H2LR.000379F	99.633	1635	6	0	1	1635	181466	183100	0	2987	181466	183100	103917	69129	Full	+
21	CBCAS	S8H2LR.000379F	99.827	1157	2	0	1	1157	227800	228956	0	2126	227800	228956	150251	23273	Full	+
22	CBDAS	S8H2LR.000379F	99.817	1637	1	2	1	1635	274664	276300	0	3005	274664	276300	13327	37558	Partial	+
23	CBCAS	S8H2LR.000379F	99.939	1635	1	0	1	1635	342836	344470	0	3014	342836	344470	10244	22711	Full	+
	query	target	pident	length	mismatch	gaps	qstart	qend	tstart	tend	evalue	bitscore	start	end	down	up	type	direction
0	CBCAS	S8Ha.chr7	99.572	1635	7	0	1	1635	34740567	34742201	0	2981	34740567	34742201	82985	298306	Full	+
1	CBCAS	S8Ha.chr7	99.633	1635	6	0	1	1635	34797143	34798777	0	2987	34797143	34798777	139561	241730	Full	+
2	CBCAS	S8Ha.chr7	99.827	1157	2	0	1	1157	34843476	34844632	0	2126	34843476	34844632	185894	195875	Full	+
3	CBCAS	S8Ha.chr7	99.878	1635	2	0	1	1635	34910672	34912306	0	3009	34910672	34912306	253090	128201	Full	+
4	CBCAS	S8Ha.chr7	99.756	1636	3	1	1	1635	34972602	34974237	0	2998	34972602	34974237	315020	66270	Partial	+
5	CBCAS	S8Ha.chr7	99.878	1635	2	0	1	1635	35020450	35022084	0	3009	35020450	35022084	362868	18423	Full	+
6	CBCAS	S8Ha.chr7	99.939	1635	1	0	1	1635	35108330	35109964	0	3014	35108330	35109964	65751	75453	Full	+
7	THCAS	S8Ha.chr7	91.402	1419	116	6	211	1627	51053701	51055115	0	1940	51053701	51055115	149732	128627	Partial	+
8	CBDAS	S8Ha.chr7	91.327	980	83	2	657	1635	51180104	51179126	0	1338	51179126	51180104	275157	3638	Partial	-
9	CBDAS	S8Ha.chr7	92.416	1635	124	0	1	1635	51212101	51210467	0	2333	51210467	51212101	14061	416	Partial	-
10	CBDAS	S8Ha.chr7	92.416	1635	124	0	1	1635	51271349	51269715	0	2333	51269715	51271349	14537	416	Partial	-
11	CBDAS	S8Ha.chr7	92.538	1635	122	0	1	1635	51305693	51304059	0	2344	51304059	51305693	24288	416	Partial	-
12	CBDAS	S8Ha.chr7	91.927	1635	132	0	1	1635	51336087	51334453	0	2289	51334453	51336087	15962	416	Partial	-
13	CBDAS	S8Ha.chr7	100	1635	0	0	1	1635	51989925	51991559	0	3020	51989925	51991559	32932	10280	Full	+
	query	target	pident	length	mismatch	gaps	qstart	qend	tstart	tend	evalue	bitscore	start	end	down	up	type	direction
0	CBDAS	S8Hb.chr7	92.322	1628	114	4	9	1635	10626586	10624969	0	2303	10624969	10626586	11406	8158	Partial	-
1	CBDAS	S8Hb.chr7	94.814	1639	76	4	1	1635	10897216	10895583	0	2547	10895583	10897216	46893	8567	Partial	-
2	CBDAS	S8Hb.chr7	93.712	1638	94	4	1	1635	11041411	11039780	0	2446	11039780	11041411	100601	14913	Partial	-
3	CBDAS	S8Hb.chr7	87.581	773	91	5	865	1635	11113427	11112658	0	891	11112658	11113427	52324	18650	Partial	-
4	CBDAS	S8Hb.chr7	93.83	778	47	1	858	1635	11113431	11112655	0	1170	11112655	11113431	52321	18646	Partial	-
5	CBDAS	S8Hb.chr7	93.772	867	45	4	1	863	11123733	11122872	0	1293	11122872	11123733	62538	8344	Partial	-
6	THCAS	S8Hb.chr7	100	1635	0	0	1	1635	11243706	11245340	0	3020	11243706	11245340	32490	86509	Full	+
7	CBDAS	S8Hb.chr7	91.865	1635	133	0	1	1635	11955598	11957232	0	2283	11955598	11957232	416	25884	Partial	+
8	CBDAS	S8Hb.chr7	92.232	1635	127	0	1	1635	12008508	12010142	0	2316	12008508	12010142	417	22233	Partial	+
9	CBDAS	S8Hb.chr7	89.805	1638	158	3	1	1635	12049855	12051486	0	2091	12049855	12051486	416	26027	Partial	+
10	CBDAS	S8Hb.chr7	92.441	1614	122	0	22	1635	12049870	12051483	0	2305	12049870	12051483	431	26030	Partial	+
11	CBDAS	S8Hb.chr7	91.203	1637	138	4	1	1635	12101308	12102940	0	2220	12101308	12102940	420	314655	Partial	+
12	THCAS	S8Hb.chr7	91.31	1634	137	5	1	1633	12252591	12250962	0	2226	12250962	12252591	150074	165004	Partial	-
13	CBCAS	S8Hb.chr7	99.939	1635	1	0	1	1635	30091671	30090037	0	3014	30090037	30091671	8168	12897	Full	-
14	CBCAS	S8Hb.chr7	99.878	1635	2	0	1	1635	30159836	30158202	0	3009	30158202	30159836	50149	146838	Full	-
15	CBCAS	S8Hb.chr7	99.817	1635	3	0	1	1635	30209555	30207921	0	3003	30207921	30209555	99868	97119	Full	-
	query	target	pident	length	mismatch	gaps	qstart	qend	tstart	tend	evalue	bitscore	start	end	down	up	type	direction
0	THCAS	S8LR.000009F	91.402	1419	116	6	211	1627	14885403	14886817	0	1940	14885403	14886817	166781	128628	Partial	+
1	CBDAS	S8LR.000009F	91.327	980	83	2	657	1635	15011807	15010829	0	1338	15010829	15011807	292207	3638	Partial	-
2	CBDAS	S8LR.000009F	92.416	1635	124	0	1	1635	15043804	15042170	0	2333	15042170	15043804	14061	416	Partial	-
3	CBDAS	S8LR.000009F	92.416	1635	124	0	1	1635	15103053	15101419	0	2333	15101419	15103053	14537	416	Partial	-
4	CBDAS	S8LR.000009F	92.538	1635	122	0	1	1635	15137396	15135762	0	2344	15135762	15137396	24288	416	Partial	-
5	CBDAS	S8LR.000009F	91.927	1635	132	0	1	1635	15167791	15166157	0	2289	15166157	15167791	15962	416	Partial	-
6	CBDAS	S8LR.000009F	100	1635	0	0	1	1635	15824952	15826586	0	3020	15824952	15826586	32930	10280	Full	+
7	CBCAS	S8LR.000015F	99.878	1635	2	0	1	1635	731324	732958	0	3009	731324	732958	106837	-1077	Full	+
8	CBDAS	S8LR.000015F	99.756	1636	3	1	1	1635	795331	796966	0	2998	795331	796966	31329	188135	Partial	+
9	CBCAS	S8LR.000015F	99.878	1635	2	0	1	1635	843179	844813	0	3009	843179	844813	79177	140288	Full	+
10	CBCAS	S8LR.000015F	99.939	1635	1	0	1	1635	931059	932693	0	3014	931059	932693	167057	52408	Full	+
11	CBDAS	S8LR.000041F	98.599	1642	6	17	1	1635	13135	11504	0	2889	11504	13135	7252	164944	Partial	-
12	CBCAS	S8LR.000041F	99.878	1635	2	0	1	1635	77134	75500	0	3009	75500	77134	71248	100945	Full	-
13	CBCAS	S8LR.000041F	99.571	1166	5	0	1	1166	150769	149604	0	2126	149604	150769	145352	27310	Full	-
14	CBCAS	S8LR.000041F	99.633	1635	6	0	1	1635	197102	195468	0	2987	195468	197102	12023	14521	Full	-
15	CBCAS	S8LR.000041F	99.572	1635	7	0	1	1635	253678	252044	0	2981	252044	253678	35400	28548	Full	-
	query	target	pident	length	mismatch	gaps	qstart	qend	tstart	tend	evalue	bitscore	start	end	down	up	type	direction
0	CBCAS	SAN2a.chr7	99.694	1635	5	0	1	1635	36265194	36266828	0	2992	36265194	36266828	95427	166480	Full	+
1	CBCAS	SAN2a.chr7	99.939	1635	1	0	1	1635	36317256	36318890	0	3014	36317256	36318890	147489	114418	Full	+
2	CBCAS	SAN2a.chr7	99.694	1635	5	0	1	1635	36381289	36382923	0	2992	36381289	36382923	211522	50385	Full	+
3	CBCAS	SAN2a.chr7	99.817	1635	3	0	1	1635	36446502	36448136	0	3003	36446502	36448136	4813	5228	Full	+
4	CBCAS	SAN2a.chr7	99.633	1635	6	0	1	1635	36546768	36548402	0	2987	36546768	36548402	89919	59642	Full	+
5	CBCAS	SAN2a.chr7	99.878	1635	2	0	1	1635	36608854	36610488	0	3009	36608854	36610488	152005	-2444	Full	+
6	CBCAS	SAN2a.chr7	99.572	1635	7	0	1	1635	36675504	36677138	0	2981	36675504	36677138	62577	351776	Full	+
7	CBCAS	SAN2a.chr7	99.873	787	1	0	1	787	36787081	36787867	0	1448	36787081	36787867	174154	241047	Full	+
8	CBCAS	SAN2a.chr7	99.745	783	2	0	853	1635	36787863	36788645	0	1435	36787863	36788645	174936	240269	Full	+
9	CBCAS	SAN2a.chr7	99.878	1635	2	0	1	1635	36865228	36866862	0	3009	36865228	36866862	252301	162052	Full	+
10	CBCAS	SAN2a.chr7	99.45	1635	2	1	1	1635	36924583	36926210	0	2963	36924583	36926210	311656	102704	Partial	+
11	CBCAS	SAN2a.chr7	99.675	1230	4	0	1	1230	36993448	36994677	0	2250	36993448	36994677	380521	34237	Full	+
12	CBCAS	SAN2a.chr7	99.817	1635	3	0	1	1635	37067900	37069534	0	3003	37067900	37069534	35344	317233	Full	+
13	CBCAS	SAN2a.chr7	99.878	1635	2	0	1	1635	37149998	37151632	0	3009	37149998	37151632	117442	235135	Full	+
14	CBCAS	SAN2a.chr7	99.817	1635	3	0	1	1635	37216751	37218385	0	3003	37216751	37218385	184195	168382	Full	+
15	CBCAS	SAN2a.chr7	99.878	1635	2	0	1	1635	37297291	37298925	0	3009	37297291	37298925	264735	87842	Full	+
16	CBDAS	SAN2a.chr7	91.402	1419	116	6	211	1627	54932214	54933628	0	1940	54932214	54933628	93243	7705	Partial	+
17	CBDAS	SAN2a.chr7	91.327	980	83	2	657	1635	55048169	55047191	0	1338	55047191	55048169	99134	3635	Partial	-
18	CBDAS	SAN2a.chr7	92.355	1635	125	0	1	1635	55089666	55088032	0	2327	55088032	55089666	14060	416	Partial	-
19	CBDAS	SAN2a.chr7	92.416	1635	124	0	1	1635	55158390	55156756	0	2333	55156756	55158390	14529	416	Partial	-
20	CBDAS	SAN2a.chr7	92.477	1635	123	0	1	1635	55197984	55196350	0	2338	55196350	55197984	16020	416	Partial	-
21	CBDAS	SAN2a.chr7	91.804	1635	134	0	1	1635	55228399	55226765	0	2278	55226765	55228399	15983	416	Partial	-
22	CBDAS	SAN2a.chr7	92.477	1635	123	0	1	1635	55291842	55290208	0	2338	55290208	55291842	38837	416	Partial	-
	query	target	pident	length	mismatch	gaps	qstart	qend	tstart	tend	evalue	bitscore	start	end	down	up	type	direction
0	THCAS	SAN2b.chr7	91.402	1419	116	6	211	1627	54531122	54532536	0	1940	54531122	54532536	96121	128321	Partial	+
1	CBDAS	SAN2b.chr7	91.327	980	83	2	657	1635	54657222	54656244	0	1338	54656244	54657222	221243	3635	Partial	-
2	CBDAS	SAN2b.chr7	92.355	1635	125	0	1	1635	54698719	54697085	0	2327	54697085	54698719	14060	416	Partial	-
3	CBDAS	SAN2b.chr7	92.416	1635	124	0	1	1635	54767443	54765809	0	2333	54765809	54767443	14529	416	Partial	-
4	CBDAS	SAN2b.chr7	92.477	1635	123	0	1	1635	54807037	54805403	0	2338	54805403	54807037	16020	416	Partial	-
5	CBDAS	SAN2b.chr7	91.804	1635	134	0	1	1635	54837452	54835818	0	2278	54835818	54837452	15983	416	Partial	-
6	CBDAS	SAN2b.chr7	92.477	1635	123	0	1	1635	54900895	54899261	0	2338	54899261	54900895	38837	416	Partial	-
	query	target	pident	length	mismatch	gaps	qstart	qend	tstart	tend	evalue	bitscore	start	end	down	up	type	direction
0	CBDAS	SCFB.00002360	94.994	1638	73	3	1	1635	1806250	1804619	0	2562	1804619	1806250	142924	14148	Partial	-
1	CBDAS	SCFB.00002360	94.139	1638	88	3	1	1635	1853172	1851540	0	2486	1851540	1853172	7773	11667	Partial	-
2	CBDAS	SCFB.00002360	94.207	1640	86	4	1	1635	1940446	1938811	0	2494	1938811	1940446	5984	20317	Partial	-
3	THCAS	SCFB.00002360	99.755	1635	4	0	1	1635	2054836	2056470	0	2998	2054836	2056470	11592	-35	Full	+
4	CBDAS	SCFB.00002360	92.416	1635	124	0	1	1635	2792819	2794453	0	2333	2792819	2794453	416	18008	Partial	+
5	CBDAS	SCFB.00002360	92.416	1635	123	1	1	1635	2838451	2840084	0	2331	2838451	2840084	418	16057	Partial	+
6	CBDAS	SCFB.00002360	92.355	1635	125	0	1	1635	2869442	2871076	0	2327	2869442	2871076	416	1717	Partial	+
7	CBDAS	SCFB.00002360	92.049	1635	129	1	1	1635	2915286	2916919	0	2298	2915286	2916919	415	27690	Partial	+
8	THCAS	SCFB.00002360	91.222	1424	121	4	211	1633	3092567	3091147	0	1934	3091147	3092567	60301	130533	Partial	-
9	CBDAS	SCFB.00002296	91.4	1628	135	5	1	1627	1668646	1670269	0	2226	1668646	1670269	6951	150129	Partial	+
10	CBDAS	SCFB.00002296	91.376	1635	138	1	1	1635	1819982	1818351	0	2235	1818351	1819982	156656	416	Partial	-
11	CBDAS	SCFB.00002296	92.427	1611	122	0	25	1635	1871407	1869797	0	2300	1869797	1871407	-1823	409	Partial	-
12	CBDAS	SCFB.00002296	89.744	1638	159	3	1	1635	1871425	1869794	0	2085	1869794	1871425	-1826	391	Partial	-
13	CBDAS	SCFB.00002296	92.171	1635	128	0	1	1635	1907810	1906176	0	2311	1906176	1907810	22233	417	Partial	-
14	CBDAS	SCFB.00002296	91.865	1635	133	0	1	1635	1960347	1958713	0	2283	1958713	1960347	25886	416	Partial	-
15	THCAS	SCFB.00002296	99.878	1635	2	0	1	1635	2672642	2671008	0	3009	2671008	2672642	45524	37607	Full	-
16	CBDAS	SCFB.00002296	93.887	867	44	4	1	863	2794418	2795279	0	1299	2794418	2795279	2015	17182	Partial	+
17	CBDAS	SCFB.00002296	94.065	775	45	1	858	1632	2804742	2805515	0	1175	2804742	2805515	12339	6946	Partial	+
18	CBDAS	SCFB.00002296	93.712	1638	94	4	1	1635	2884587	2886218	0	2446	2884587	2886218	-4594	3238	Partial	+
19	CBDAS	SCFB.00002296	94.814	1639	76	4	1	1635	2977794	2979427	0	2547	2977794	2979427	6795	386	Partial	+
20	CBDAS	SCFB.00002296	92.506	1628	111	4	9	1635	3242715	3244332	0	2320	3242715	3244332	8159	2476	Partial	+
	query	target	pident	length	mismatch	gaps	qstart	qend	tstart	tend	evalue	bitscore	start	end	down	up	type	direction
0	CBDAS	SDFBa.chr7	92.506	1628	111	4	9	1635	10908885	10907268	0	2320	10907268	10908885	176647	8158	Partial	-
1	CBDAS	SDFBa.chr7	94.814	1639	76	4	1	1635	11173798	11172165	0	2547	11172165	11173798	46887	6795	Partial	-
2	CBDAS	SDFBa.chr7	93.773	1638	93	4	1	1635	11267004	11265373	0	2451	11265373	11267004	46682	12118	Partial	-
3	CBDAS	SDFBa.chr7	87.71	773	90	5	865	1635	11328292	11327523	0	896	11327523	11328292	39943	18674	Partial	-
4	CBDAS	SDFBa.chr7	93.959	778	46	1	858	1635	11328296	11327520	0	1175	11327520	11328296	39940	18670	Partial	-
5	CBDAS	SDFBa.chr7	93.887	867	44	4	1	863	11338621	11337760	0	1299	11337760	11338621	50180	8345	Partial	-
6	THCAS	SDFBa.chr7	100	1635	0	0	1	1635	11465826	11467460	0	3020	11465826	11467460	47322	86492	Full	+
7	CBDAS	SDFBa.chr7	91.865	1635	133	0	1	1635	12158209	12159843	0	2283	12158209	12159843	416	25886	Partial	+
8	CBDAS	SDFBa.chr7	92.232	1635	127	0	1	1635	12210753	12212387	0	2316	12210753	12212387	417	22233	Partial	+
9	CBDAS	SDFBa.chr7	89.805	1638	158	3	1	1635	12247139	12248770	0	2091	12247139	12248770	415	26027	Partial	+
10	CBDAS	SDFBa.chr7	92.441	1614	122	0	22	1635	12247154	12248767	0	2305	12247154	12248767	430	26030	Partial	+
11	CBDAS	SDFBa.chr7	91.376	1635	138	1	1	1635	12298585	12300216	0	2235	12298585	12300216	416	138124	Partial	+
12	CBDAS	SDFBa.chr7	91.31	1634	137	5	1	1633	12449901	12448272	0	2226	12448272	12449901	8569	154741	Partial	-
13	CBCAS	SDFBa.chr7	99.878	1635	2	0	1	1635	30444080	30442446	0	3009	30442446	30444080	101721	4985	Full	-
14	CBCAS	SDFBa.chr7	99.939	1635	1	0	1	1635	30526258	30524624	0	3014	30524624	30526258	35834	20811	Full	-
15	CBCAS	SDFBa.chr7	99.817	1635	3	0	1	1635	30607604	30605970	0	3003	30605970	30607604	6296	139876	Full	-
[truncated: 1,456 more rows]

## Sheet: Figure4e_tree
((((((747759_SZFBa.chr7_THCAS_18_helitron_Type1_mj:0.000000006,742263_TKFBa.chr7_THCAS_18_helitron_Type1_mj:0.000000006)0.759:0.000000006,(637532_AH3Mb.chr7_THCAS_11_helitron_Type1_mj:0.013039933,((771345_DPSVa.chr7_THCAS_3_helitron_Type2_F1:0.000000006,597090_DPFBa.chr7_THCAS_3_helitron_Type1_mj:0.000000006)0.456:0.000000006,(637533_AH3Mb.chr7_THCAS_11_helitron_Type1_mj:0.000000006,681480_COFBb.…
